# Supplementary material for: SATB2 induction of a neural crest mesenchyme-like program drives melanoma invasion and drug resistance
Source: eLife. 2021 Feb 2;10:e64370. doi: 10.7554/eLife.64370 (PMC7880683; doi:10.7554/eLife.64370)
Supplement: Figure 1—figure supplement 1—source data 1. [file elife-64370-fig1-figsupp1-data1.xlsx]

## Sheet: A
Weeks	SATB2 (n=98)	EGFP (n=76)	CBX6 (n=56)	DPF2 (n=56)	PYGO2 (n=77)	SMARC1B (n=25)	PHF23 (n=46)	Pool C (n=85)
8.1	1
8.1	1
8.1	1
8.1	1
8.1	1
8.1	1
8.1	1
8.1	1
9.1	1
9.1	1
9.1	1
9.1	1
9.1	1
9.1	1
9.1	1
9.1	1
9.1	1
9.1	1
9.1	1
9.1	1
9.1	0
11	1
11	1
11	1
11	1
11	1
11	1
11	1
11	1
11	1
11	1
11	1
11	1
11	1
11	1
11	1
11	1
11	1
11	1
11	1
11	1
11	0
12	1
12	1
12	1
12	1
12	1
12	1
12	1
12	1
12	1
12	1
12	1
12	1
12	1
12	1
12	1
12	1
12	1
12	1
12	1
12	1
12	0
14.1	1
14.1	1
14.1	1
14.1	1
14.1	1
14.1	1
14.1	1
14.1	1
14.1	1
14.1	1
14.1	0
14.1	0
14.1	0
14.1	0
15.1	1
15.1	1
15.1	1
16	1
16	1
16	1
16	1
16	1
16	1
16	1
16	1
16	1
16	1
16	1
16	1
16	1
16	0
16	0
16	0
16	0
16	0
5.7		0
6.7		0
7.3		0
8.9		1
9.9		1
10.7		1
11.1		1
11.1		1
11.1		1
11.1		0
14.1		1
14.1		1
14.1		1
14.1		0
15.7		1
15.7		1
15.7		1
15.7		1
15.7		1
15.7		0
18.1		1
18.1		1
18.1		0
20.6		1
20.6		1
20.6		1
21.4		1
21.4		1
21.4		1
21.4		1
23		1
24.3		1
24.3		1
24.3		1
24.3		1
24.3		0
24.3		0
24.3		0
24.3		0
24.3		0
24.3		0
24.3		0
24.3		0
24.3		0
9.6		1
16.4		1
16.4		1
16.4		1
16.4		1
16.4		0
16.4		0
16.4		0
16.4		0
16.4		0
16.4		0
16.4		0
16.4		0
16.4		0
16.4		0
16.4		0
16.4		0
16.4		0
16.4		0
16.4		0
16.4		0
16.4		0
16.4		0
16.4		0
16.4		0
16.4		0
16.4		0
16.4		0
16.4		0
16.4		0
16.4		0
16.4		0
10.7			1
10.7			1
10.7			1
10.7			1
10.7			1
10.7			1
10.7			1
15.9			1
15.9			1
15.9			1
15.9			1
15.9			1
15.9			1
15.9			1
15.9			1
15.9			1
15.9			1
15.9			1
15.9			1
15.9			1
15.9			0
15.9			0
15.9			0
16.7			0
21.6			1
21.6			1
21.6			1
21.6			0
21.6			0
21.6			0
21.6			0
21.6			0
21.6			0
21.6			0
21.6			0
21.6			0
21.6			0
21.6			0
21.6			0
21.6			0
21.6			0
21.6			0
21.6			0
21.6			0
21.6			0
21.6			0
21.6			0
21.6			0
21.6			0
21.6			0
21.6			0
21.6			0
21.6			0
21.6			0
21.6			0
21.6			0
8.6				1
9.4				1
11.4				1
13.4				1
16.1				1
16.1				1
16.1				1
18				0
18				1
18				1
18				1
18				1
20				0
20				0
20				0
20				0
20				0
20				0
20				0
20				0
20				0
20				0
20				0
20				0
20				0
20				0
20				0
20				0
20				0
20				0
20				0
20				0
20				0
20				0
20				0
20				0
20				0
20				0
20				0
20				0
20				0
20				0
20				0
20				0
20				0
20				0
20				0
20				0
20				0
20				0
20				0
20				0
20				0
20				0
20				0
20				0
9.1					1
9.1					1
9.1					1
9.1					1
10.3					1
10.3					0
11.1					1
11.1					1
11.1					1
11.1					1
11.1					0
13.1					1
13.1					1
13.1					1
13.1					1
13.1					1
13.1					1
13.1					1
15.1					1
15.1					1
15.1					1
15.1					1
15.1					1
15.1					1
15.1					1
15.1					1
15.1					1
15.1					1
15.1					1
15.1					1
17.9					1
17.9					1
17.9					1
17.9					1
17.9					1
17.9					1
17.9					1
19.7					1
19.7					1
19.7					1
19.7					1
19.7					1
19.7					1
19.7					1
19.7					1
19.7					1
19.7					0
19.7					0
19.7					0
19.7					0
19.7					0
19.7					0
19.7					0
19.7					0
19.7					0
19.7					0
19.7					0
19.7					0
19.7					0
19.7					0
19.7					0
19.7					0
19.7					0
19.7					0
19.7					0
19.7					0
19.7					0
19.7					0
19.7					0
19.7					0
19.7					0
19.7					0
19.7					0
19.7					0
19.7					0
19.7					0
19.7					0
8.1							1
10							1
10							1
10							1
10							1
13.6							1
13.6							1
13.6							1
13.6							1
13.6							1
15.7							1
15.7							1
15.7							1
15.7							1
15.7							1
15.7							1
15.7							1
15.7							1
15.7							1
17.9							1
17.9							1
19.7							1
19.7							1
19.7							0
19.7							0
19.7							0
19.7							0
19.7							0
19.7							0
19.7							0
19.7							0
19.7							0
19.7							0
19.7							0
19.7							0
19.7							0
19.7							0
19.7							0
19.7							0
19.7							0
19.7							0
19.7							0
19.7							0
19.7							0
19.7							0
19.7							0
11.6						1
13.6						1
13.6						1
13.6						1
14.7						1
15.3						1
15.3						1
16.7						1
16.7						1
17.6						1
17.6						0
17.6						0
20.1						1
20.1						1
20.1						0
20.1						0
20.1						0
20.1						0
20.1						0
20.1						0
20.1						0
20.1						0
20.1						0
20.1						0
20.1						0
7								1
8								1
8								1
8								1
9								0
10								0
12								1
12								1
12								1
12								1
12								1
14								1
14								1
15								1
15								1
16								1
16								1
16								1
16								1
16								1
16								1
16								1
16								1
17								1
17								1
18								1
18								1
18								1
18								0
18								0
18								0
18								0
18								0
18								0
18								0
18								0
18								0
18								0
18								0
18								0
18								0
18								0
18								0
18								0
18								0
18								0
18								0
18								0
18								0
18								0
18								0
18								0
18								0
18								0
18								0
18								0
18								0
18								0
18								0
18								0
18								0
18								0
18								0
18								0
18								0
18								0
18								0
18								0
18								0
18								0
18								0
18								0
18								0
18								0
18								0
18								0
18								0
18								0
18								0
18								0
18								0
18								0
18								0
18								0
18								0

## Sheet: B
Weeks	SATB2 (n=98)	EGFP (n=76)	MECP2 (n=67)	CDYL2 (n=72)	MDM4 (n=93)	PPARG (n=93)	DMAP1 (n=98)	Pool G (n=85)
8.1	1
8.1	1
8.1	1
8.1	1
8.1	1
8.1	1
8.1	1
8.1	1
9.1	1
9.1	1
9.1	1
9.1	1
9.1	1
9.1	1
9.1	1
9.1	1
9.1	1
9.1	1
9.1	1
9.1	1
9.1	0
11	1
11	1
11	1
11	1
11	1
11	1
11	1
11	1
11	1
11	1
11	1
11	1
11	1
11	1
11	1
11	1
11	1
11	1
11	1
11	1
11	0
12	1
12	1
12	1
12	1
12	1
12	1
12	1
12	1
12	1
12	1
12	1
12	1
12	1
12	1
12	1
12	1
12	1
12	1
12	1
12	1
12	0
14.1	1
14.1	1
14.1	1
14.1	1
14.1	1
14.1	1
14.1	1
14.1	1
14.1	1
14.1	1
14.1	0
14.1	0
14.1	0
14.1	0
15.1	1
15.1	1
15.1	1
16	1
16	1
16	1
16	1
16	1
16	1
16	1
16	1
16	1
16	1
16	1
16	1
16	1
16	0
16	0
16	0
16	0
16	0
5.7		0
6.7		0
7.3		0
8.9		1
9.9		1
10.7		1
11.1		1
11.1		1
11.1		1
11.1		0
14.1		1
14.1		1
14.1		1
14.1		0
15.7		1
15.7		1
15.7		1
15.7		1
15.7		1
15.7		0
18.1		1
18.1		1
18.1		0
20.6		1
20.6		1
20.6		1
21.4		1
21.4		1
21.4		1
21.4		1
23		1
24.3		1
24.3		1
24.3		1
24.3		1
24.3		0
24.3		0
24.3		0
24.3		0
24.3		0
24.3		0
24.3		0
24.3		0
24.3		0
9.6		1
16.4		1
16.4		1
16.4		1
16.4		1
16.4		0
16.4		0
16.4		0
16.4		0
16.4		0
16.4		0
16.4		0
16.4		0
16.4		0
16.4		0
16.4		0
16.4		0
16.4		0
16.4		0
16.4		0
16.4		0
16.4		0
16.4		0
16.4		0
16.4		0
16.4		0
16.4		0
16.4		0
16.4		0
16.4		0
16.4		0
16.4		0
8.6			1
8.6			1
11.4			1
11.4			1
13.7			1
13.7			1
13.7			1
13.7			1
13.7			1
13.7			1
13.7			1
13.7			1
13.7			1
13.7			1
15.7			1
15.7			1
15.7			1
15.7			1
15.7			1
15.7			1
18.6			1
18.6			1
18.6			1
18.6			1
18.6			0
18.6			0
18.6			0
18.6			0
18.6			0
18.6			0
18.6			0
18.6			0
18.6			0
18.6			0
18.6			0
18.6			0
18.6			0
18.6			0
18.6			0
18.6			0
18.6			0
18.6			0
18.6			0
18.6			0
18.6			0
18.6			0
18.6			0
18.6			0
18.6			0
18.6			0
18.6			0
18.6			0
18.6			0
18.6			0
18.6			0
18.6			0
18.6			0
18.6			0
18.6			0
18.6			0
18.6			0
18.6			0
18.6			0
18.6			0
18.6			0
18.6			0
18.6			0
8.4				1
8.4				1
8.4				1
8.4				1
9.7				1
9.7				1
9.7				1
9.7				1
9.7				1
9.7				1
9.7				1
11.9				1
11.9				1
11.9				1
11.9				1
11.9				1
11.9				1
11.9				1
11.9				1
11.9				1
13.6				1
13.6				1
13.6				1
13.6				1
13.6				1
13.6				1
13.6				1
15.7				1
15.7				1
15.7				1
18.4				1
18.4				1
18.4				1
18.4				1
18.4				1
18.4				1
18.4				1
18.4				1
18.4				1
18.4				0
18.4				0
18.4				0
18.4				0
18.4				0
18.4				0
18.4				0
18.4				0
18.4				0
18.4				0
18.4				0
18.4				0
18.4				0
18.4				0
18.4				0
18.4				0
18.4				0
18.4				0
18.4				0
18.4				0
18.4				0
18.4				0
18.4				0
18.4				0
18.4				0
18.4				0
18.4				0
18.4				0
18.4				0
18.4				0
18.4				0
18.4				0
18.4				0
8.28571					1
8.28571					1
8.28571					1
8.28571					1
9.14286					1
9.14286					1
9.14286					1
10.4286					1
10.4286					1
10.4286					1
10.4286					1
10.4286					1
11.2857					1
11.2857					1
13.4286					1
13.4286					1
13.4286					1
13.4286					1
13.4286					1
13.4286					1
13.4286					1
13.4286					1
13.4286					1
13.4286					1
13.4286					0
15.2857					1
15.2857					1
15.2857					1
15.2857					1
15.2857					1
15.2857					1
15.2857					1
15.2857					1
15.2857					0
15.2857					0
15.2857					0
17.2857					1
17.2857					1
17.2857					1
17.2857					1
17.2857					1
17.2857					0
20.2857					1
20.2857					1
20.2857					1
20.2857					1
20.2857					1
20.2857					0
20.2857					0
20.2857					0
20.2857					0
20.2857					0
20.2857					0
20.2857					0
20.2857					0
20.2857					0
20.2857					0
20.2857					0
20.2857					0
20.2857					0
20.2857					0
20.2857					0
20.2857					0
20.2857					0
20.2857					0
20.2857					0
20.2857					0
20.2857					0
20.2857					0
20.2857					0
20.2857					0
20.2857					0
20.2857					0
20.2857					0
20.2857					0
20.2857					0
20.2857					0
20.2857					0
20.2857					0
20.2857					0
20.2857					0
20.2857					0
20.2857					0
20.2857					0
20.2857					0
20.2857					0
20.2857					0
20.2857					0
20.2857					0
20.2857					0
20.2857					0
20.2857					0
20.2857					0
8.7						1
8.7						1
11.4						1
13.3						1
15.5						1
15.5						1
15.5						1
15.5						1
16.7						1
16.7						1
16.7						1
17.6						1
17.6						1
17.6						1
17.6						1
20.4						1
20.4						1
20.4						1
20.4						1
20.4						1
20.4						1
20.4						1
20.4						1
20.4						1
20.4						1
20.4						1
20.4						1
20.4						1
20.4						1
20.4						0
20.4						0
20.4						0
20.4						0
20.4						0
20.4						0
20.4						0
20.4						0
20.4						0
20.4						0
20.4						0
20.4						0
20.4						0
20.4						0
20.4						0
20.4						0
20.4						0
20.4						0
20.4						0
20.4						0
20.4						0
20.4						0
20.4						0
20.4						0
20.4						0
20.4						0
20.4						0
20.4						0
20.4						0
20.4						0
20.4						0
20.4						0
20.4						0
20.4						0
20.4						0
20.4						0
20.4						0
20.4						0
20.4						0
20.4						0
20.4						0
20.4						0
20.4						0
20.4						0
20.4						0
20.4						0
20.4						0
20.4						0
20.4						0
20.4						0
20.4						0
20.4						0
20.4						0
20.4						0
20.4						0
20.4						0
20.4						0
20.4						0
20.4						0
20.4						0
20.4						0
20.4						0
20.4						0
20.4						0
8							1
8							1
9.9							1
9.9							1
9.9							1
9.9							1
9.9							1
9.9							1
9.9							1
9.9							1
9.9							1
9.9							1
9.9							1
11							1
11							1
11							1
11							1
11							1
11							1
11							1
11							1
11							1
12							1
12							1
12							1
12							1
14							1
14							1
14							1
14							1
14							1
14							1
14							1
14							1
14							1
16							1
16							1
16							1
16							1
16							1
16							1
16							1
16							1
16							1
18							1
18							1
18							1
18							1
18							1
18							1
18							1
18							1
18							1
21							1
21							0
21							0
21							0
21							0
21							0
21							0
21							0
21							0
21							0
21							0
21							0
21							0
21							0
21							0
21							0
21							0
21							0
21							0
21							0
21							0
21							0
21							0
21							0
21							0
21							0
21							0
21							0
21							0
21							0
21							0
21							0
21							0
21							0
21							0
21							0
21							0
21							0
21							0
21							0
21							0
21							0
21							0
21							0
21							0
7								1
7								1
7								1
7								1
8								1
8								1
9								1
10								1
10								1
10								1
12								1
12								1
12								1
12								1
12								1
12								1
14								1
14								1
14								1
15								1
15								1
15								1
15								1
15								1
15								1
15								1
15								1
15								1
15								1
15								1
15								1
17								1
17								1
17								1
17								1
17								1
17								1
17								1
17								1
17								1
17								1
17								1
17								1
17								1
17								1
17								1
18								1
18								1
18								1
18								1
18								0
18								0
18								0
18								0
18								0
18								0
18								0
18								0
18								0
18								0
18								0
18								0
18								0
18								0
18								0
18								0
18								0
18								0
18								0
18								0
18								0
18								0
18								0
18								0
18								0
18								0
18								0
18								0
18								0
18								0
18								0
18								0
18								0
18								0
18								0

## Sheet: C
Weeks	SATB2 (n=98)	EGFP (n=76)	SMARCAL1 (n=66)	TRIM28 (n=72)	PCAF (n=84)	EZH2 (n=71)	SMARCB1 (n=25)	Pool I (n=63)
8.1	1
8.1	1
8.1	1
8.1	1
8.1	1
8.1	1
8.1	1
8.1	1
9.1	1
9.1	1
9.1	1
9.1	1
9.1	1
9.1	1
9.1	1
9.1	1
9.1	1
9.1	1
9.1	1
9.1	1
9.1	0
11	1
11	1
11	1
11	1
11	1
11	1
11	1
11	1
11	1
11	1
11	1
11	1
11	1
11	1
11	1
11	1
11	1
11	1
11	1
11	1
11	0
12	1
12	1
12	1
12	1
12	1
12	1
12	1
12	1
12	1
12	1
12	1
12	1
12	1
12	1
12	1
12	1
12	1
12	1
12	1
12	1
12	0
14.1	1
14.1	1
14.1	1
14.1	1
14.1	1
14.1	1
14.1	1
14.1	1
14.1	1
14.1	1
14.1	0
14.1	0
14.1	0
14.1	0
15.1	1
15.1	1
15.1	1
16	1
16	1
16	1
16	1
16	1
16	1
16	1
16	1
16	1
16	1
16	1
16	1
16	1
16	0
16	0
16	0
16	0
16	0
5.7		0
6.7		0
7.3		0
8.9		1
9.9		1
10.7		1
11.1		1
11.1		1
11.1		1
11.1		0
14.1		1
14.1		1
14.1		1
14.1		0
15.7		1
15.7		1
15.7		1
15.7		1
15.7		1
15.7		0
18.1		1
18.1		1
18.1		0
20.6		1
20.6		1
20.6		1
21.4		1
21.4		1
21.4		1
21.4		1
23		1
24.3		1
24.3		1
24.3		1
24.3		1
24.3		0
24.3		0
24.3		0
24.3		0
24.3		0
24.3		0
24.3		0
24.3		0
24.3		0
9.6		1
16.4		1
16.4		1
16.4		1
16.4		1
16.4		0
16.4		0
16.4		0
16.4		0
16.4		0
16.4		0
16.4		0
16.4		0
16.4		0
16.4		0
16.4		0
16.4		0
16.4		0
16.4		0
16.4		0
16.4		0
16.4		0
16.4		0
16.4		0
16.4		0
16.4		0
16.4		0
16.4		0
16.4		0
16.4		0
16.4		0
16.4		0
7.7			1
7.7			1
7.7			1
7.7			1
8.7			1
8.7			1
10.1			1
10.1			1
11.1			1
11.1			1
11.1			1
11.1			1
12.1			0
12.1			0
12.1			0
12.1			0
12.1			0
12.1			0
12.1			0
12.1			0
12.1			0
12.1			0
12.1			0
12.1			0
12.1			0
12.1			0
12.1			0
12.1			0
12.1			0
12.1			0
12.1			0
12.1			0
12.1			0
12.1			0
12.1			0
12.1			0
12.1			0
12.1			0
12.1			0
12.1			0
12.1			0
12.1			0
12.1			0
12.1			0
12.1			0
12.1			0
12.1			0
12.1			0
12.1			0
12.1			0
12.1			0
12.1			0
12.1			0
12.1			0
12.1			0
12.1			0
12.1			0
12.1			0
12.1			0
12.1			0
12.1			0
12.1			0
12.1			0
12.1			0
12.1			0
12.1			0
7.9				1
7.9				1
7.9				1
7.9				1
8.9				1
8.9				1
8.9				1
8.9				1
10.4				1
11.4				1
11.4				1
11.4				1
11.4				1
11.4				1
11.4				1
12.4				1
14.1				1
14.1				1
14.1				1
14.1				1
14.1				1
14.1				1
14.1				1
14.1				1
14.1				1
14.1				1
14.1				1
14.1				1
15				1
15				1
18.7				1
18.7				1
18.7				1
18.7				1
18.7				1
18.7				1
18.7				1
18.7				1
18.7				0
18.7				0
18.7				0
18.7				0
18.7				0
18.7				0
18.7				0
18.7				0
18.7				0
18.7				0
18.7				0
18.7				0
18.7				0
18.7				0
18.7				0
18.7				0
18.7				0
18.7				0
18.7				0
18.7				0
18.7				0
18.7				0
18.7				0
18.7				0
18.7				0
18.7				0
18.7				0
18.7				0
18.7				0
18.7				0
18.7				0
18.7				0
18.7				0
18.7				0
8.1					1
8.1					1
8.1					1
9					1
10					1
11.1					1
12.1					1
12.1					1
12.1					1
12.1					0
12.1					0
12.1					0
12.1					0
12.1					0
12.1					0
12.1					0
12.1					0
12.1					0
12.1					0
12.1					0
12.1					0
12.1					0
12.1					0
12.1					0
12.1					0
12.1					0
12.1					0
12.1					0
12.1					0
12.1					0
12.1					0
12.1					0
12.1					0
12.1					0
12.1					0
12.1					0
12.1					0
12.1					0
12.1					0
12.1					0
12.1					0
12.1					0
12.1					0
12.1					0
12.1					0
12.1					0
12.1					0
12.1					0
12.1					0
12.1					0
12.1					0
12.1					0
12.1					0
12.1					0
12.1					0
12.1					0
12.1					0
12.1					0
12.1					0
12.1					0
12.1					0
12.1					0
12.1					0
12.1					0
12.1					0
12.1					0
12.1					0
12.1					0
12.1					0
12.1					0
12.1					0
12.1					0
12.1					0
12.1					0
12.1					0
12.1					0
12.1					0
12.1					0
12.1					0
12.1					0
12.1					0
12.1					0
12.1					0
12.1					0
7.6						1
8.7						1
8.7						1
10.1						1
10.1						1
10.1						1
12.1						1
12.1						1
12.1						1
12.1						1
13.9						1
14.7						1
14.7						1
14.7						1
18.4						1
18.4						1
18.4						1
18.4						1
18.4						1
18.4						1
18.4						1
18.4						1
18.4						0
18.4						0
18.4						0
18.4						0
18.4						0
18.4						0
18.4						0
18.4						0
18.4						0
18.4						0
18.4						0
18.4						0
18.4						0
18.4						0
18.4						0
18.4						0
18.4						0
18.4						0
18.4						0
18.4						0
18.4						0
18.4						0
18.4						0
18.4						0
18.4						0
18.4						0
18.4						0
18.4						0
18.4						0
18.4						0
18.4						0
18.4						0
18.4						0
18.4						0
18.4						0
18.4						0
18.4						0
18.4						0
18.4						0
18.4						0
18.4						0
18.4						0
18.4						0
18.4						0
18.4						0
18.4						0
18.4						0
18.4						0
18.4						0
11.6							1
13.6							1
13.6							1
13.6							1
14.7							1
15.3							1
15.3							1
16.7							1
16.7							1
17.6							1
17.6							0
17.6							0
20.1							1
20.1							1
20.1							0
20.1							0
20.1							0
20.1							0
20.1							0
20.1							0
20.1							0
20.1							0
20.1							0
20.1							0
20.1							0
6								1
6								1
6								1
7								0
8								1
9								1
9								0
9								0
10								1
10								1
10								1
11								1
11								1
11								1
13								1
13								1
13								1
13								1
13								1
13								1
13								1
13								1
14								1
14								1
15								1
15								1
15								1
17								1
17								1
17								1
17								1
17								1
17								1
17								1
17								1
17								1
17								1
17								1
17								1
18								1
18								1
18								1
18								1
18								0
18								0
18								0
18								0
18								0
18								0
18								0
18								0
18								0
18								0
18								0
18								0
18								0
18								0
18								0
18								0
18								0
18								0
18								0
18								0

## Sheet: D
Weeks	SATB2 (n=98)	EGFP (n=76)	CHMP6 (n=18)	CBX1 (n=101)	HDAC6 (n=58)	CBX3 (n=55)	CBX5 (n=51)	Pool B (n=56)
8.1	1
8.1	1
8.1	1
8.1	1
8.1	1
8.1	1
8.1	1
8.1	1
9.1	1
9.1	1
9.1	1
9.1	1
9.1	1
9.1	1
9.1	1
9.1	1
9.1	1
9.1	1
9.1	1
9.1	1
9.1	0
11	1
11	1
11	1
11	1
11	1
11	1
11	1
11	1
11	1
11	1
11	1
11	1
11	1
11	1
11	1
11	1
11	1
11	1
11	1
11	1
11	0
12	1
12	1
12	1
12	1
12	1
12	1
12	1
12	1
12	1
12	1
12	1
12	1
12	1
12	1
12	1
12	1
12	1
12	1
12	1
12	1
12	0
14.1	1
14.1	1
14.1	1
14.1	1
14.1	1
14.1	1
14.1	1
14.1	1
14.1	1
14.1	1
14.1	0
14.1	0
14.1	0
14.1	0
15.1	1
15.1	1
15.1	1
16	1
16	1
16	1
16	1
16	1
16	1
16	1
16	1
16	1
16	1
16	1
16	1
16	1
16	0
16	0
16	0
16	0
16	0
5.7		0
6.7		0
7.3		0
8.9		1
9.9		1
10.7		1
11.1		1
11.1		1
11.1		1
11.1		0
14.1		1
14.1		1
14.1		1
14.1		0
15.7		1
15.7		1
15.7		1
15.7		1
15.7		1
15.7		0
18.1		1
18.1		1
18.1		0
20.6		1
20.6		1
20.6		1
21.4		1
21.4		1
21.4		1
21.4		1
23		1
24.3		1
24.3		1
24.3		1
24.3		1
24.3		0
24.3		0
24.3		0
24.3		0
24.3		0
24.3		0
24.3		0
24.3		0
24.3		0
9.6		1
16.4		1
16.4		1
16.4		1
16.4		1
16.4		0
16.4		0
16.4		0
16.4		0
16.4		0
16.4		0
16.4		0
16.4		0
16.4		0
16.4		0
16.4		0
16.4		0
16.4		0
16.4		0
16.4		0
16.4		0
16.4		0
16.4		0
16.4		0
16.4		0
16.4		0
16.4		0
16.4		0
16.4		0
16.4		0
16.4		0
16.4		0
13.6			1
13.6			1
18.9			1
18.9			1
18.9			1
22.3			1
22.3			0
22.3			0
22.3			0
22.3			0
22.3			0
22.3			0
22.3			0
22.3			0
22.3			0
22.3			0
22.3			0
22.3			0
7.1				1
10.9				1
10.9				1
10.9				1
10.9				1
10.9				1
10.9				1
10.9				1
16				1
16				1
16				1
16				1
16				1
16				1
16				1
16				1
16				1
16				1
16				1
16				1
16				1
16				1
16				1
16				1
16				1
16				1
16				1
17				1
17				1
17				1
17				1
19.9				1
19.9				1
19.9				1
19.9				1
19.9				1
19.9				1
19.9				1
19.9				1
21.7				1
21.7				1
21.7				1
21.7				1
21.7				0
21.7				0
21.7				0
21.7				0
21.7				0
21.7				0
21.7				0
21.7				0
21.7				0
21.7				0
21.7				0
21.7				0
21.7				0
21.7				0
21.7				0
21.7				0
21.7				0
21.7				0
21.7				0
21.7				0
21.7				0
21.7				0
21.7				0
21.7				0
21.7				0
21.7				0
21.7				0
21.7				0
21.7				0
21.7				0
21.7				0
21.7				0
21.7				0
21.7				0
21.7				0
21.7				0
21.7				0
21.7				0
21.7				0
21.7				0
21.7				0
21.7				0
21.7				0
21.7				0
21.7				0
21.7				0
21.7				0
21.7				0
21.7				0
21.7				0
21.7				0
21.7				0
21.7				0
21.7				0
21.7				0
21.7				0
21.7				0
21.7				0
8					1
8					1
8					1
9.9					1
10.4					1
10.4					1
11.6					1
11.6					1
11.6					1
11.6					1
11.6					1
11.6					1
14.7					1
14.7					1
16.4					1
16.4					1
16.4					1
16.4					1
16.4					0
16.4					0
16.4					0
16.4					0
16.4					0
16.4					0
16.4					0
16.4					0
16.4					0
16.4					0
16.4					0
16.4					0
16.4					0
16.4					0
16.4					0
16.4					0
16.4					0
16.4					0
16.4					0
16.4					0
16.4					0
16.4					0
16.4					0
16.4					0
16.4					0
16.4					0
16.4					0
16.4					0
16.4					0
16.4					0
16.4					0
16.4					0
16.4					0
16.4					0
16.4					0
16.4					0
16.4					0
16.4					0
16.4					0
16.4					0
9						1
11.7						1
16.6						1
16.6						1
16.6						1
16.6						1
17.9						1
17.9						1
17.9						1
17.9						0
17.9						0
17.9						0
19.9						1
19.9						1
19.9						0
19.9						0
19.9						0
19.9						0
19.9						0
19.9						0
19.9						0
19.9						0
19.9						0
19.9						0
19.9						0
19.9						0
19.9						0
19.9						0
19.9						0
19.9						0
19.9						0
19.9						0
19.9						0
19.9						0
19.9						0
19.9						0
19.9						0
19.9						0
19.9						0
19.9						0
19.9						0
19.9						0
19.9						0
19.9						0
19.9						0
19.9						0
19.9						0
19.9						0
19.9						0
19.9						0
19.9						0
19.9						0
19.9						0
19.9						0
19.9						0
6.7							1
6.7							1
6.7							1
6.7							1
9.4							1
9.4							1
10.3							1
11.3							1
11.3							1
11.3							1
14.3							1
14.3							1
14.3							1
14.3							0
14.3							0
15.6							1
15.6							1
15.6							1
15.6							1
15.6							1
15.6							1
17.4							0
17.4							0
17.4							0
17.4							0
19.1							1
19.1							1
19.1							1
19.1							1
19.1							1
19.1							1
19.1							1
19.1							0
19.1							0
19.1							0
19.1							0
19.1							0
19.1							0
19.1							0
19.1							0
19.1							0
19.1							0
19.1							0
19.1							0
19.1							0
19.1							0
19.1							0
19.1							0
19.1							0
19.1							0
19.1							0
8								1
8								1
8								1
8								1
8								1
9								1
9								1
11								1
11								1
11								1
11								1
12								1
12								1
12								1
12								1
12								1
14								1
14								1
14								1
14								1
14								1
14								1
14								1
14								1
14								1
14								1
15								1
15								1
15								1
16								1
18								1
18								1
18								1
18								1
18								1
18								1
18								1
18								1
18								1
18								0
18								0
18								0
18								0
18								0
18								0
18								0
18								0
18								0
18								0
18								0
18								0
18								0
18								0
18								0
18								0
18								0
