# Supplementary material for: SATB2 induction of a neural crest mesenchyme-like program drives melanoma invasion and drug resistance
Source: eLife. 2021 Feb 2;10:e64370. doi: 10.7554/eLife.64370 (PMC7880683; doi:10.7554/eLife.64370)
Supplement: Figure 1—source data 1. [file elife-64370-fig1-data1.xlsx]

## Sheet: Figure 1B
weeks	EGFP (n=45)	Pool F (n=69)	Pool D (n=58)	Pool B (n=56)	Pool C (n=85)	Pool E (n=68)	Pool I (n=63)	Pool L (n=72)	Pool G (n=85)	Pool A (n=57)	Pool H (n=37)	Pool J (n=97)	Pool K (n=99)	Pool N (n=36)	Pool P (n=50)	Pool M (n=47)	SETDB1 (n=70)	CYCLIN D1 (n=44)
7	0
8	0
8.9	0
10.3	1
11.4	1
12.9	0
13.7	0
14.9	1
14.9	1
16.9	1
16.9	1
19.9	1
19.9	0
19.9	0
19.9	0
19.9	0
19.9	0
19.9	0
19.9	0
19.9	0
19.9	0
19.9	0
19.9	0
19.9	0
19.9	0
19.9	0
19.9	0
19.9	0
19.9	0
19.9	0
19.9	0
19.9	0
19.9	0
19.9	0
19.9	0
19.9	0
19.9	0
19.9	0
19.9	0
19.9	0
19.9	0
19.9	0
19.9	0
19.9	0
19.9	0
8		1
8		1
8		1
8		1
8		1
8		1
8		1
8		1
8		1
8		1
8		1
8		1
8		1
8		1
8		1
8		1
8		1
9		1
9		1
11		1
11		1
12		1
12		1
12		1
12		1
12		1
12		1
12		1
12		1
12		1
14		1
14		1
14		1
14		1
14		1
14		1
14		1
14		1
14		1
14		1
14		1
14		1
14		1
14		1
15		1
15		1
15		1
15		1
15		1
15		1
16		1
16		1
16		1
16		1
16		0
16		0
16		0
16		0
16		0
16		0
16		0
16		0
16		0
16		0
16		0
16		0
16		0
16		0
16		0
7			1
8			1
8			1
8			1
8			1
10			1
10			1
10			1
10			1
12			1
12			1
13			1
14			1
14			1
14			1
14			1
15			1
15			1
15			1
15			1
15			1
15			1
17			1
17			1
17			1
17			1
17			1
17			1
17			1
17			1
17			1
17			1
17			1
17			1
17			1
17			1
17			1
17			1
17			1
19			1
19			1
19			0
19			0
19			0
19			0
19			0
19			0
19			0
19			0
19			0
19			0
19			0
19			0
19			0
19			0
19			0
19			0
19			0
8				1
8				1
8				1
8				1
8				1
9				1
9				1
11				1
11				1
11				1
11				1
12				1
12				1
12				1
12				1
12				1
14				1
14				1
14				1
14				1
14				1
14				1
14				1
14				1
14				1
14				1
15				1
15				1
15				1
16				1
18				1
18				1
18				1
18				1
18				1
18				1
18				1
18				1
18				1
18				0
18				0
18				0
18				0
18				0
18				0
18				0
18				0
18				0
18				0
18				0
18				0
18				0
18				0
18				0
18				0
18				0
7					1
8					1
8					1
8					1
9					0
10					0
12					1
12					1
12					1
12					1
12					1
14					1
14					1
15					1
15					1
16					1
16					1
16					1
16					1
16					1
16					1
16					1
16					1
17					1
17					1
18					1
18					1
18					1
18					0
18					0
18					0
18					0
18					0
18					0
18					0
18					0
18					0
18					0
18					0
18					0
18					0
18					0
18					0
18					0
18					0
18					0
18					0
18					0
18					0
18					0
18					0
18					0
18					0
18					0
18					0
18					0
18					0
18					0
18					0
18					0
18					0
18					0
18					0
18					0
18					0
18					0
18					0
18					0
18					0
18					0
18					0
18					0
18					0
18					0
18					0
18					0
18					0
18					0
18					0
18					0
18					0
18					0
18					0
18					0
18					0
7						1
8						0
10						0
12						0
12						1
12						1
13						1
15						1
15						1
15						1
17						0
18						1
18						1
18						1
18						0
18						0
18						0
18						0
18						0
18						0
18						0
18						0
18						0
18						0
18						0
18						0
18						0
18						0
18						0
18						0
18						0
18						0
18						0
18						0
18						0
18						0
18						0
18						0
18						0
18						0
18						0
18						0
18						0
18						0
18						0
18						0
18						0
18						0
18						0
18						0
18						0
18						0
18						0
18						0
18						0
18						0
18						0
18						0
18						0
18						0
18						0
18						0
18						0
18						0
18						0
18						0
18						0
18						0
6							1
6							1
6							1
7							0
8							1
9							1
9							0
9							0
10							1
10							1
10							1
11							1
11							1
11							1
13							1
13							1
13							1
13							1
13							1
13							1
13							1
13							1
14							1
14							1
15							1
15							1
15							1
17							1
17							1
17							1
17							1
17							1
17							1
17							1
17							1
17							1
17							1
17							1
17							1
18							1
18							1
18							1
18							1
18							0
18							0
18							0
18							0
18							0
18							0
18							0
18							0
18							0
18							0
18							0
18							0
18							0
18							0
18							0
18							0
18							0
18							0
18							0
18							0
5								1
6								1
6								1
6								1
8								1
8								1
8								1
8								1
8								1
8								1
10								1
10								1
10								1
10								1
10								1
10								1
10								1
10								1
10								1
10								1
10								1
10								1
10								1
10								1
10								1
10								1
15								1
15								1
15								1
15								1
15								1
15								1
15								1
15								1
15								1
15								1
15								1
15								1
15								1
15								1
15								0
15								0
15								0
15								0
15								0
15								0
15								0
15								0
15								0
15								0
15								0
15								0
15								0
15								0
15								0
15								0
15								0
15								0
15								0
15								0
15								0
15								0
15								0
15								0
15								0
15								0
15								0
15								0
15								0
15								0
15								0
15								0
7									1
7									1
7									1
7									1
8									1
8									1
9									1
10									1
10									1
10									1
12									1
12									1
12									1
12									1
12									1
12									1
14									1
14									1
14									1
15									1
15									1
15									1
15									1
15									1
15									1
15									1
15									1
15									1
15									1
15									1
15									1
17									1
17									1
17									1
17									1
17									1
17									1
17									1
17									1
17									1
17									1
17									1
17									1
17									1
17									1
17									1
18									1
18									1
18									1
18									1
18									0
18									0
18									0
18									0
18									0
18									0
18									0
18									0
18									0
18									0
18									0
18									0
18									0
18									0
18									0
18									0
18									0
18									0
18									0
18									0
18									0
18									0
18									0
18									0
18									0
18									0
18									0
18									0
18									0
18									0
18									0
18									0
18									0
18									0
18									0
11.6										1
11.6										1
12.9										1
14.1										1
15.1										1
16.1										1
16.1										1
18.3										1
18.3										1
18.3										1
18.3										1
18.3										1
18.3										1
18.3										1
18.3										1
18.3										0
21.3										1
21.3										1
21.3										1
21.3										1
21.3										0
21.3										0
21.3										0
22.1										1
22.1										1
22.1										1
23.1										1
23.1										1
23.1										0
23.1										0
23.1										0
23.1										0
23.1										0
23.1										0
23.1										0
23.1										0
23.1										0
23.1										0
23.1										0
23.1										0
23.1										0
23.1										0
23.1										0
23.1										0
23.1										0
23.1										0
23.1										0
23.1										0
23.1										0
23.1										0
23.1										0
23.1										0
23.1										0
23.1										0
23.1										0
23.1										0
23.1										0
9.7											1
9.7											0
9.7											0
9.7											0
12.9											1
14.3											1
14.3											1
18.4											1
18.4											1
18.4											1
18.4											1
18.4											1
18.4											0
18.4											0
18.4											0
18.4											0
18.4											0
18.4											0
18.4											0
18.4											0
18.4											0
18.4											0
18.4											0
18.4											0
18.4											0
18.4											0
18.4											0
18.4											0
18.4											0
18.4											0
18.4											0
18.4											0
18.4											0
18.4											0
18.4											0
18.4											0
18.4											0
8.3												0
9.3												0
14												1
14												0
14												0
16												1
16												1
16												0
16												0
16												0
16												0
16												0
16												0
16												0
16												0
16												0
16												0
16												0
16												0
16												0
16												0
16												0
16												0
16												0
16												0
16												0
16												0
16												0
16												0
16												0
16												0
16												0
16												0
16												0
16												0
16												0
16												0
16												0
16												0
16												0
16												0
16												0
16												0
16												0
16												0
16												0
16												0
16												0
16												0
16												0
16												0
16												0
16												0
16												0
16												0
16												0
16												0
16												0
16												0
16												0
16												0
16												0
16												0
16												0
16												0
16												0
16												0
16												0
16												0
16												0
16												0
16												0
16												0
16												0
16												0
16												0
16												0
16												0
16												0
16												0
16												0
16												0
16												0
16												0
16												0
16												0
16												0
16												0
16												0
16												0
16												0
16												0
16												0
16												0
16												0
16												0
16												0
7													1
7													1
8													2
8													2
8													0
8													0
9													1
9													1
9													1
10.1													1
10.1													0
11.6													1
11.6													1
13.7													1
13.7													1
15.7													1
15.7													1
15.7													1
15.7													1
15.7													1
20.6													1
20.6													1
20.6													1
20.6													1
20.6													1
20.6													1
20.6													1
20.6													1
20.6													1
20.6													1
20.6													1
20.6													1
20.6													1
20.6													1
20.6													0
20.6													0
20.6													0
20.6													0
20.6													0
20.6													0
20.6													0
20.6													0
20.6													0
20.6													0
20.6													0
20.6													0
20.6													0
20.6													0
20.6													0
20.6													0
20.6													0
20.6													0
20.6													0
20.6													0
20.6													0
20.6													0
20.6													0
20.6													0
20.6													0
20.6													0
20.6													0
20.6													0
20.6													0
20.6													0
20.6													0
20.6													0
20.6													0
20.6													0
20.6													0
20.6													0
20.6													0
20.6													0
20.6													0
20.6													0
20.6													0
20.6													0
20.6													0
20.6													0
20.6													0
20.6													0
20.6													0
20.6													0
20.6													0
20.6													0
20.6													0
20.6													0
20.6													0
20.6													0
20.6													0
20.6													0
20.6													0
20.6													0
20.6													0
20.6													0
20.6													0
20.6													0
20.6													0
20.6													0
20.6													0
20.6													0
20.6													0
9.1														1
9.1														1
9.1														0
9.1														0
9.1														0
9.1														0
9.1														0
9.1														0
10.7														1
10.7														1
10.7														0
10.7														0
14.9														1
14.9														1
14.9														1
14.9														1
19.7														1
19.7														1
19.7														0
19.7														0
19.7														0
19.7														0
19.7														0
19.7														0
19.7														0
19.7														0
19.7														0
19.7														0
19.7														0
19.7														0
19.7														0
19.7														0
19.7														0
19.7														0
19.7														0
19.7														0
8.1															1
8.1															0
9.14															0
9.14															1
10.7															1
12.9															1
12.9															1
12.9															1
12.9															0
14.9															0
14.9															0
14.9															0
14.9															0
14.9															0
14.9															0
14.9															0
14.9															0
14.9															0
14.9															0
14.9															0
14.9															0
14.9															0
14.9															0
14.9															0
14.9															0
14.9															0
14.9															0
14.9															0
14.9															0
14.9															0
14.9															0
14.9															0
14.9															0
14.9															0
14.9															0
14.9															0
14.9															0
14.9															0
14.9															0
14.9															0
14.9															0
14.9															0
14.9															0
14.9															0
14.9															0
14.9															0
14.9															0
14.9															0
14.9															0
14.9															0
12.4																1
13.3																1
13.3																1
14.4																0
19																1
19																1
19																1
19																1
19																1
23.1																1
23.1																1
23.1																1
23.1																1
23.1																1
23.1																1
23.1																1
23.1																1
23.1																1
23.1																1
23.1																0
23.1																0
23.1																0
23.1																0
23.1																0
23.1																0
23.1																0
23.1																0
23.1																0
23.1																0
23.1																0
23.1																0
23.1																0
23.1																0
23.1																0
23.1																0
23.1																0
23.1																0
23.1																0
23.1																0
23.1																0
23.1																0
23.1																0
23.1																0
23.1																0
23.1																0
23.1																0
23.1																0
7																	1
7																	1
7																	1
7																	1
8																	1
8																	1
8																	1
9																	1
9																	1
9																	1
9																	1
9																	1
9																	1
10																	1
10																	1
10																	1
10																	1
11																	1
11																	1
11																	1
11																	1
11																	1
11																	1
11																	1
11																	1
11																	1
12																	1
12																	1
12																	1
12																	1
12																	1
12																	1
12																	1
12																	1
12																	1
12																	1
12																	1
13																	1
13																	1
13																	1
13																	1
13																	1
14																	1
14																	1
14																	1
14																	1
14																	1
14																	1
15																	1
15																	1
15																	1
16																	1
17																	1
17																	0
17																	0
17																	0
17																	0
17																	0
17																	0
17																	0
17																	0
17																	0
17																	0
17																	0
17																	0
17																	0
17																	0
17																	0
17																	0
17																	0
8																		0
11																		1
11																		1
11																		1
11																		1
11																		1
11																		1
11																		1
11																		1
11																		1
11																		1
12																		1
12																		1
12																		1
12																		1
12																		1
12																		1
12																		1
12																		1
12																		1
12																		1
12																		1
12																		1
13																		1
13																		1
13																		1
13																		1
13																		1
14																		1
14																		1
14																		1
14																		1
15																		1
15																		1
16																		1
18																		1
18																		0
18																		0
18																		0
18																		0
18																		0
18																		0
18																		0
18																		0

## Sheet: Figure 1C
Weeks	CTCF (n=62)	HDAC10 (n=88)	MTA2 (n=22)	SATB2 (n=98)	EGFP (n=76)	PF21A (n=31)	SETDB1 (n=70)	CYCLIN D1 (n=44)	POOL F (n=69)
7.1	1
13.14	1
13.14	1
13.14	1
13.14	1
13.14	1
13.14	1
13.14	1
13.14	1
13.14	0
15.14	1
15.14	1
15.14	1
15.14	1
15.14	1
15.14	1
15.14	1
15.14	0
15.14	0
17	1
17	1
17	1
17	0
17	0
20	1
20	1
20	1
20	1
20	1
20	1
20	1
20	1
20	1
20	1
20	1
20	1
21.71	1
21.71	1
21.71	1
21.71	1
21.71	1
21.71	1
21.71	1
21.71	1
21.71	1
21.71	0
21.71	0
21.71	0
21.71	0
21.71	0
21.71	0
21.71	0
21.71	0
21.71	0
21.71	0
21.71	0
21.71	0
21.71	0
21.71	0
21.71	0
21.71	0
21.71	0
7.4		1
9.7		1
9.7		0
11.6		1
11.6		0
12.7		0
12.7		0
14.8		1
14.8		1
14.8		1
14.8		1
14.8		1
14.8		1
14.8		0
14.8		0
17		1
17		1
17		1
17		1
17		1
17		1
17		1
17		1
17		1
17		1
17		0
17		0
22.4		1
22.4		1
22.4		1
22.4		1
22.4		1
22.4		1
22.4		1
22.4		1
22.4		1
22.4		1
22.4		1
22.4		1
22.4		1
22.4		1
22.4		1
22.4		1
22.4		1
22.4		0
22.4		0
22.4		0
22.4		0
22.4		0
22.4		0
22.4		0
22.4		0
22.4		0
22.4		0
22.4		0
22.4		0
22.4		0
22.4		0
22.4		0
22.4		0
22.4		0
22.4		0
22.4		0
22.4		0
22.4		0
22.4		0
22.4		0
22.4		0
22.4		0
22.4		0
22.4		0
22.4		0
22.4		0
22.4		0
22.4		0
22.4		0
22.4		0
22.4		0
22.4		0
22.4		0
22.4		0
22.4		0
22.4		0
22.4		0
22.4		0
22.4		0
22.4		0
22.4		0
10.6			1
10.6			0
13.6			1
15.1			1
15.1			0
20.3			1
20.3			1
20.3			1
20.3			0
20.3			0
20.3			0
20.3			0
20.3			0
20.3			0
20.3			0
20.3			0
20.3			0
20.3			0
20.3			0
20.3			0
20.3			0
20.3			0
8.1				1
8.1				1
8.1				1
8.1				1
8.1				1
8.1				1
8.1				1
8.1				1
9.1				1
9.1				1
9.1				1
9.1				1
9.1				1
9.1				1
9.1				1
9.1				1
9.1				1
9.1				1
9.1				1
9.1				1
9.1				0
11				1
11				1
11				1
11				1
11				1
11				1
11				1
11				1
11				1
11				1
11				1
11				1
11				1
11				1
11				1
11				1
11				1
11				1
11				1
11				1
11				0
12				1
12				1
12				1
12				1
12				1
12				1
12				1
12				1
12				1
12				1
12				1
12				1
12				1
12				1
12				1
12				1
12				1
12				1
12				1
12				1
12				0
14.1				1
14.1				1
14.1				1
14.1				1
14.1				1
14.1				1
14.1				1
14.1				1
14.1				1
14.1				1
14.1				0
14.1				0
14.1				0
14.1				0
15.1				1
15.1				1
15.1				1
16				1
16				1
16				1
16				1
16				1
16				1
16				1
16				1
16				1
16				1
16				1
16				1
16				1
16				0
16				0
16				0
16				0
16				0
5.7					0
6.7					0
7.3					0
8.9					1
9.9					1
10.7					1
11.1					1
11.1					1
11.1					1
11.1					0
14.1					1
14.1					1
14.1					1
14.1					0
15.7					1
15.7					1
15.7					1
15.7					1
15.7					1
15.7					0
18.1					1
18.1					1
18.1					0
20.6					1
20.6					1
20.6					1
21.4					1
21.4					1
21.4					1
21.4					1
23					1
24.3					1
24.3					1
24.3					1
24.3					1
24.3					0
24.3					0
24.3					0
24.3					0
24.3					0
24.3					0
24.3					0
24.3					0
24.3					0
9.6					1
16.4					1
16.4					1
16.4					1
16.4					1
16.4					0
16.4					0
16.4					0
16.4					0
16.4					0
16.4					0
16.4					0
16.4					0
16.4					0
16.4					0
16.4					0
16.4					0
16.4					0
16.4					0
16.4					0
16.4					0
16.4					0
16.4					0
16.4					0
16.4					0
16.4					0
16.4					0
16.4					0
16.4					0
16.4					0
16.4					0
16.4					0
9.6						1
16.4						1
16.4						1
16.4						1
16.4						1
16.4						0
16.4						0
16.4						0
16.4						0
16.4						0
16.4						0
16.4						0
16.4						0
16.4						0
16.4						0
16.4						0
16.4						0
16.4						0
16.4						0
16.4						0
16.4						0
16.4						0
16.4						0
16.4						0
16.4						0
16.4						0
16.4						0
16.4						0
16.4						0
16.4						0
16.4						0
7							1
7							1
7							1
7							1
8							1
8							1
8							1
9							1
9							1
9							1
9							1
9							1
9							1
10							1
10							1
10							1
10							1
11							1
11							1
11							1
11							1
11							1
11							1
11							1
11							1
11							1
12							1
12							1
12							1
12							1
12							1
12							1
12							1
12							1
12							1
12							1
12							1
13							1
13							1
13							1
13							1
13							1
14							1
14							1
14							1
14							1
14							1
14							1
15							1
15							1
15							1
16							1
17							1
17							0
17							0
17							0
17							0
17							0
17							0
17							0
17							0
17							0
17							0
17							0
17							0
17							0
17							0
17							0
17							0
17							0
8								0
11								1
11								1
11								1
11								1
11								1
11								1
11								1
11								1
11								1
11								1
12								1
12								1
12								1
12								1
12								1
12								1
12								1
12								1
12								1
12								1
12								1
12								1
13								1
13								1
13								1
13								1
13								1
14								1
14								1
14								1
14								1
15								1
15								1
16								1
18								1
18								0
18								0
18								0
18								0
18								0
18								0
18								0
18								0
8									1
8									1
8									1
8									1
8									1
8									1
8									1
8									1
8									1
8									1
8									1
8									1
8									1
8									1
8									1
8									1
8									1
9									1
9									1
11									1
11									1
12									1
12									1
12									1
12									1
12									1
12									1
12									1
12									1
12									1
14									1
14									1
14									1
14									1
14									1
14									1
14									1
14									1
14									1
14									1
14									1
14									1
14									1
14									1
15									1
15									1
15									1
15									1
15									1
15									1
16									1
16									1
16									1
16									1
16									0
16									0
16									0
16									0
16									0
16									0
16									0
16									0
16									0
16									0
16									0
16									0
16									0
16									0
16									0
