# Supplementary material for: SATB2 induction of a neural crest mesenchyme-like program drives melanoma invasion and drug resistance
Source: eLife. 2021 Feb 2;10:e64370. doi: 10.7554/eLife.64370 (PMC7880683; doi:10.7554/eLife.64370)
Supplement: Supplementary file 1. [file elife-64370-supp1.xlsx]

## Sheet: Sheet1
Gene	Pool	Accession nr or reference	Reference Invitrogen Ultimate ORF (https://orf.thermofisher.com/cgi-bin/ORF_Browser)
MLLT11	A	NM_006818.3	IOH6044
HMGA1	A	NM_145899.2	IOH6516
HMGN2	A	NM_005517.3	IOH40568
HMGN1	A	NM_004965.6	IOH4772
CHRAC1	A	NM_017444.5	IOH10035
CBX3	B	NM_016587.3	IOH3033
CBX5	B	NM_012117.2	IOH3162
CBX1	B	NM_006807.4	IOH4111
HDAC6	B	NM_006044.2	IOH53646
CHMP6	B	NM_024591.4	IOH13020
CBX6	C	HsCD00045684, BC012111
DPF2	C	NM_006268.4	IOH10017
SMARCB1	C	NM_003073.3	IOH29630
PYGO2	C	NM_138300.3	IOH22981
PHF23	C	NM_024297.2	IOH3968
CBX7	D	HsCD00367737, BC051773.1
CHMP2B	D	NM_014043.3	IOH10899
HDGF	D	NM_004494.2	IOH14546
YEATS4	D	NM_006530.3	IOH2880
MYBL2	D	NM_002466.3	IOH6886
ING2	E	NM_001564.3	IOH22913
MBD3	E	NM_001281453.1	IOH59233
CITED2	E	NM_006079.4	IOH5598
NSBP1	E	NM_030763.2	IOH7341
ING4	E	NM_001127582.1	IOH6512
pf21a	F	NM_001101802.1	IOH10024
MTA2	F	NM_004739.3	IOH28963
SATB2	F	NM_015265.3	IOH46688
CTCF	F	NM_006565.3	IOH57148
HDAC10	F	NM_032019.5	IOH42550
MDM4	G	NM_002393.4	IOH40040
MECP2	G	NM_004992.3	IOH59107
PPARG	G	NM_015869.4	IOH36704
CDYL2	G	NM_152342.2	IOH40313
DMAP1	G,N	NM_019100.4	IOH5405
CBX8	H	NM_020649.2	IOH27823
HDAC3	H	NM_003883.3	IOH4233
BRD2	H	NM_005104.3	IOH45178
ELF3	H	NM_001114309.1	IOH4879
ZCWPW2	H	NM_001040432.2	IOH62605
EZH1	I	NM_001991.3	IOH10021
SMARCAL1	I	NM_014140.3	IOH26405
KAT2B	I	NM_003884.4	IOH29147
TRIM28	I	NM_005762.2	IOH5106
EZH2	I	NM_004456.4	IOH9963
BRPF1	J	NM_001003694.1	IOH29001
TRIM24	J	NM_015905.2	IOH45510
KDM4B	J	NM_015015.2	IOH53632
SMARCC2	J	NM_003075.3	IOH56122
PHF8	J	NM_015107.2	IOH28930
ARID3B	K	BC041792.1	IOH27265
MBD1	K	NM_015846.3	IOH36702
MIER2	K	NM_017550.1	IOH40210
MTA3	K	NM_020744.3	IOH5213
PRMT5	K	NM_006109.4	IOH59120
HDGFRP3	L	NM_016073.3	IOH10649
CHMP2A	L	NM_014453.3	IOH3951
C20orf20	L	NM_018270.4	IOH14702
PHF17	L	NM_199320.3	IOH38382
CITED1	L	BC004240.1	IOH5542
VPS24	M	NM_016079.3	IOH5607
ING1	M	NM_198219.2	IOH59467
TNFAIP6	M	NM_007115.3	IOH22602
SUV39H2	M	NM_024670.3	IOH6414
CITED4	M	NM_133467.2	IOH27840
PHF22 INTS12	N	NM_020395.3	IOH13332
CHMP7	N	NM_152272.3	IOH14803
MYST1	N	BC037773.1	IOH25827
CCDC71	N	BC035516.1	IOH27307
TAF1	P	NM_004606.4	IOH45225
SUV420H1	p	NM_017635.4	IOH52927
CDC5L	p	NM_001253.3	IOH10658
RNF2	p	NM_007212.3	IOH12266
PHF16	p	NM_014735.4	IOH36182
SETDB1	Single factor	Ceol, Houvras et al., Nature 2011
SUV39H1	Single factor	Ceol, Houvras et al., Nature 2011
SATB1	Single factor	HSCD00043943
JmjD2C	Single factor	Yu et al., Cancer Cell 2018
LSD1	Single factor	Yu et al., Cancer Cell 2018
DEK	Single factor	NM_001134709
