# Supplementary material for: SATB2 induction of a neural crest mesenchyme-like program drives melanoma invasion and drug resistance
Source: eLife. 2021 Feb 2;10:e64370. doi: 10.7554/eLife.64370 (PMC7880683; doi:10.7554/eLife.64370)
Supplement: Supplementary file 2. — Genes confirmed by qPCR on a large panel of primary MCR:SATB2 tumors versus MCR:EGFP tumors. Red is upregulated, green is downregulated. (Sheet 2). Best human ortholog prediction with DIOPT (Sheet 3). MCR tumors RNA-seq data matched with human orthologs (Sheet 4). Input for GSEA analysis on MCR tumors (Sheet 5). Input for IPA analysis on MCR tumors (Sheet 6). SATB2 bound genes based on SATB2 ChIP-seq in MCR:SATB2 tumor (Sheet 7). DIOPT human ortholog prediction of SATB2 bound targets (Sheet 8), and humanized SATB2 bound target list (Sheet 9) used for overlap in Biovenn with published TFAP2A active targets in Figure 3D. Overlap of significant genes with with ChIP-seq to determine SATB2-bound and SATB2-associated loci that are misexpressed. (Sheet 10). [file elife-64370-supp2.xlsx]

## Sheet: RNA-seq MCR tumors
gene_id	gene_name	MCR:EGFP_1	MCR:EGFP_2	MCR:EGFP_3	MCR:SATB2_1	MCR:SATB2_2	MCR:SATB2_3	test_id	gene	locus	sample_1	sample_2	status	value_1	value_2	log2(fold_change)	test_stat	p_value	q_value	significant
ENSDARG00000008473	asb14a	1.57252	0.272782	0.557343	0	0	0	ENSDARG00000008473	asb14a	11:42585137-42599018	EGFP	SATB2	OK	0.800881	0	#NAME?	#NAME?	5e-05	0.00325273	yes
ENSDARG00000025017	prdm8	1.01074	0.598775	0.127662	0	0	0	ENSDARG00000025017	prdm8	13:31292699-31296358	EGFP	SATB2	OK	0.57906	0	#NAME?	#NAME?	5e-05	0.00325273	yes
ENSDARG00000035151	si:dkey-261j4.3	0.449543	0.616343	0	0	0	0	ENSDARG00000035151	si:dkey-261j4.3	5:61630695-61638125	EGFP	SATB2	OK	0.355295	0	#NAME?	#NAME?	5e-05	0.00325273	yes
ENSDARG00000052988	xcr1b.1	1.58109	0.172497	1.08897	0	0	0	ENSDARG00000052988	xcr1b.1	2:50718111-50719170	EGFP	SATB2	OK	0.947521	0	#NAME?	#NAME?	5e-05	0.00325273	yes
ENSDARG00000053853	slc13a2	3.82174	0.0504862	0	0	0	0	ENSDARG00000053853	slc13a2	21:39100288-39118502	EGFP	SATB2	OK	1.29074	0	#NAME?	#NAME?	5e-05	0.00325273	yes
ENSDARG00000055036	itih3a	2.4404	1.00253	0.185277	0	0	0	ENSDARG00000055036	itih3a	11:3614325-3629216	EGFP	SATB2	OK	1.2094	0	#NAME?	#NAME?	5e-05	0.00325273	yes
ENSDARG00000055852	mtnr1ab	0.766526	1.07451	1.29313	0	0	0	ENSDARG00000055852	mtnr1ab	14:30105610-30141162	EGFP	SATB2	OK	1.04472	0	#NAME?	#NAME?	5e-05	0.00325273	yes
ENSDARG00000068691	kctd4	0.815527	1.10025	1.35428	0	0	0	ENSDARG00000068691	kctd4	9:18829359-18905317	EGFP	SATB2	OK	1.09002	0	#NAME?	#NAME?	5e-05	0.00325273	yes
ENSDARG00000071389	si:dkey-78l4.6	4.36834	0.324317	1.2951	0	0	0	ENSDARG00000071389	si:dkey-78l4.6	22:19453821-19455139	EGFP	SATB2	OK	1.99592	0	#NAME?	#NAME?	5e-05	0.00325273	yes
ENSDARG00000074521	map6a	0.87944	0.252744	0.838616	0	0	0	ENSDARG00000074521	map6a	10:32534813-32610776	EGFP	SATB2	OK	0.656934	0	#NAME?	#NAME?	5e-05	0.00325273	yes
ENSDARG00000079043	si:dkeyp-75b4.10	19.3117	0.224046	10.4913	0	0	0	ENSDARG00000079043	si:dkeyp-75b4.10	1:9994810-10000376	EGFP	SATB2	OK	10.009	0	#NAME?	#NAME?	5e-05	0.00325273	yes
ENSDARG00000090267	CU062628.1	11.9417	0	0.126447	0	0	0	ENSDARG00000090267	CU062628.1	16:25133334-25135212	EGFP	SATB2	OK	4.02271	0	#NAME?	#NAME?	5e-05	0.00325273	yes
ENSDARG00000094291	si:rp71-45g20.11	3.00806	0.379427	0	0	0	0	ENSDARG00000094291	si:rp71-45g20.11	9:27750489-27790405	EGFP	SATB2	OK	1.12916	0	#NAME?	#NAME?	5e-05	0.00325273	yes
ENSDARG00000095934	si:dkey-151m22.8	2.43042	0	0	0	0	0	ENSDARG00000095934	si:dkey-151m22.8	1:34748694-34750169	EGFP	SATB2	OK	0.81014	0	#NAME?	#NAME?	5e-05	0.00325273	yes
ENSDARG00000097277	CR381689.1	0.609485	2.66308	0.213388	0	0	0	ENSDARG00000097277	CR381689.1	17:41383755-41428926	EGFP	SATB2	OK	1.16198	0	#NAME?	#NAME?	5e-05	0.00325273	yes
ENSDARG00000098097	jac3	25.8227	0	2.42812	0	0	0	ENSDARG00000098097	jac3	7:8570331-8577190	EGFP	SATB2	OK	9.41695	0	#NAME?	#NAME?	5e-05	0.00325273	yes
ENSDARG00000099773	olfcg4	0.154093	0	50.6027	0	0	0	ENSDARG00000099773	olfcg4	18:32979165-32982171	EGFP	SATB2	OK	16.9189	0	#NAME?	#NAME?	5e-05	0.00325273	yes
ENSDARG00000100051	si:dkey-203a12.6	28.4274	0.655758	40.2196	0	0	0	ENSDARG00000100051	si:dkey-203a12.6	14:15495087-15495844	EGFP	SATB2	OK	23.1009	0	#NAME?	#NAME?	5e-05	0.00325273	yes
ENSDARG00000102655	CABZ01050398.1	3.53167	1.93891	1.21812	0	0	0	ENSDARG00000102655	CABZ01050398.1	KN150193.1:4510-5548	EGFP	SATB2	OK	2.22957	0	#NAME?	#NAME?	5e-05	0.00325273	yes
ENSDARG00000104524	CR391991.4	0.258943	3.3035	0.51084	0	0	0	ENSDARG00000104524	CR391991.4	2:48519593-48539673	EGFP	SATB2	OK	1.35776	0	#NAME?	#NAME?	5e-05	0.00325273	yes
ENSDARG00000105432	si:cabz01029535.1	0.578891	0.0797553	0.512046	0	0	0	ENSDARG00000105432	si:cabz01029535.1	7:10351037-10372503	EGFP	SATB2	OK	0.390231	0	#NAME?	#NAME?	5e-05	0.00325273	yes
ENSDARG00000115178	si:dkey-15b23.3	0.469731	16.0741	2.0506	0	0	0	ENSDARG00000115178	si:dkey-15b23.3	7:11666685-11677237	EGFP	SATB2	OK	6.19815	0	#NAME?	#NAME?	5e-05	0.00325273	yes
ENSDARG00000051993	si:dkey-9i23.4	1.99266	0.413386	0.508009	0	0	0	ENSDARG00000051993	si:dkey-9i23.4	1:44767656-44770055	EGFP	SATB2	OK	0.971353	0	#NAME?	#NAME?	0.0001	0.00571692	yes
ENSDARG00000095098	pimr127	1.5009	0	0	0	0	0	ENSDARG00000095098	pimr127	11:38893818-38899816	EGFP	SATB2	OK	0.500301	0	#NAME?	#NAME?	0.0001	0.00571692	yes
ENSDARG00000092275	si:dkey-234d14.2	1.34194	0	0	0	0	0	ENSDARG00000092275	si:dkey-234d14.2	1:22427134-22428853	EGFP	SATB2	OK	0.447313	0	#NAME?	#NAME?	0.00015	0.00775308	yes
ENSDARG00000105447	si:ch211-129p13.1	2.5884	0	0	0	0	0	ENSDARG00000105447	si:ch211-129p13.1	18:43365889-43440181	EGFP	SATB2	OK	0.862801	0	#NAME?	#NAME?	0.00025	0.0112297	yes
ENSDARG00000097188	CU929037.2	0.708624	3.32154	0	0	0	0	ENSDARG00000097188	CU929037.2	17:49597111-49601114	EGFP	SATB2	OK	1.34339	0	#NAME?	#NAME?	0.0003	0.0130109	yes
ENSDARG00000079907	ptger4c	1.28905	0	0	0	0	0	ENSDARG00000079907	ptger4c	2:17181776-17186371	EGFP	SATB2	OK	0.429684	0	#NAME?	#NAME?	0.0004	0.0162871	yes
ENSDARG00000100948	si:ch73-47f2.1	2.85432	0	0	0	0	0	ENSDARG00000100948	si:ch73-47f2.1	5:11965112-11971946	EGFP	SATB2	OK	0.951439	0	#NAME?	#NAME?	0.0004	0.0162871	yes
ENSDARG00000095803	BX649485.3	0.543033	1.02614	0.93249	0	0	0	ENSDARG00000095803	BX649485.3	22:11106390-11107942	EGFP	SATB2	OK	0.833886	0	#NAME?	#NAME?	0.0005	0.0187099	yes
ENSDARG00000117692	CABZ01068352.1	1.41974	0	0.659674	0	0	0	ENSDARG00000117692	CABZ01068352.1	2:28165966-28216500	EGFP	SATB2	OK	0.693137	0	#NAME?	#NAME?	0.0009	0.0279878	yes
ENSDARG00000015515	mc4r	2.02513	0	0	0	0	0	ENSDARG00000015515	mc4r	2:27932780-27933864	EGFP	SATB2	OK	0.675043	0	#NAME?	#NAME?	0.001	0.029749	yes
ENSDARG00000098460	ccl39.5	4.94641	0.917803	0	0	0	0	ENSDARG00000098460	ccl39.5	25:12981430-12982193	EGFP	SATB2	OK	1.95474	0	#NAME?	#NAME?	0.00115	0.0323817	yes
ENSDARG00000038191	smtla	2.35777	0	0	0	0	0	ENSDARG00000038191	smtla	18:48168754-48178125	EGFP	SATB2	OK	0.785922	0	#NAME?	#NAME?	0.00135	0.0357458	yes
ENSDARG00000092238	or111-9	1.43882	0.275061	0.851027	0	0	0	ENSDARG00000092238	or111-9	15:31407839-31409013	EGFP	SATB2	OK	0.854971	0	#NAME?	#NAME?	0.00135	0.0357458	yes
ENSDARG00000093426	si:dkey-69c1.1	1.10412	0.073239	0	0	0	0	ENSDARG00000093426	si:dkey-69c1.1	20:14465972-14474905	EGFP	SATB2	OK	0.392453	0	#NAME?	#NAME?	0.00145	0.0374305	yes
ENSDARG00000093709	si:dkeyp-7a3.1	2.08181	0.382723	0	0	0	0	ENSDARG00000093709	si:dkeyp-7a3.1	24:35827765-35847643	EGFP	SATB2	OK	0.82151	0	#NAME?	#NAME?	0.0016	0.0402471	yes
ENSDARG00000071386	si:dkey-21e2.3	1.20741	0.37278	1.07698	0	0	0	ENSDARG00000071386	si:dkey-21e2.3	22:19486710-19491728	EGFP	SATB2	OK	0.885724	0	#NAME?	#NAME?	0.0018	0.0435831	yes
ENSDARG00000094644	si:dkey-68l7.2	1.18831	0.0907724	0.099936	0	0	0	ENSDARG00000094644	si:dkey-68l7.2	23:21955055-21957383	EGFP	SATB2	OK	0.459674	0	#NAME?	#NAME?	0.0019	0.0448531	yes
ENSDARG00000091027	aqp1a.2	2.35729	0	0.228384	0	0	0	ENSDARG00000091027	aqp1a.2	2:2761881-2766520	EGFP	SATB2	OK	0.861891	0	#NAME?	#NAME?	0.00195	0.0457472	yes
ENSDARG00000113956	BX248331.4	0	1.32298	0	0	0	0	ENSDARG00000113956	BX248331.4	11:4286629-4290096	EGFP	SATB2	OK	0.440993	0	#NAME?	#NAME?	0.00215	0.0483835	yes
ENSDARG00000094310	si:ch211-255g12.6	2.61762	0	0	0	0	0	ENSDARG00000094310	si:ch211-255g12.6	8:6954983-6958173	EGFP	SATB2	OK	0.872541	0	#NAME?	#NAME?	0.00225	0.0491677	yes
ENSDARG00000076530	jac6	1.18125	0	0.20852	0	0	0	ENSDARG00000076530	jac6	7:8489332-8490886	EGFP	SATB2	OK	0.463257	0	#NAME?	#NAME?	0.0023	0.049923	yes
ENSDARG00000028257	cyb561a3b	0	0	0	2.07928	2.5768	0.88256	ENSDARG00000028257	cyb561a3b	21:16102937-16114061	EGFP	SATB2	OK	0	1.84621	inf	#NAME?	5e-05	0.00325273	yes
ENSDARG00000038248	ggact.2	0	0	0	6.20682	1.40582	9.21231	ENSDARG00000038248	ggact.2	1:2446995-2453185	EGFP	SATB2	OK	0	5.60832	inf	#NAME?	5e-05	0.00325273	yes
ENSDARG00000045601	cax1	0	0	0	0.424864	31.597	2.09026	ENSDARG00000045601	cax1	4:14981853-14990926	EGFP	SATB2	OK	0	11.3707	inf	#NAME?	5e-05	0.00325273	yes
ENSDARG00000098127	BX324212.1	0	0	0	3.39264	0.641118	1.89319	ENSDARG00000098127	BX324212.1	4:38564563-38573606	EGFP	SATB2	OK	0	1.97565	inf	#NAME?	5e-05	0.00325273	yes
ENSDARG00000099374	sp9	0	0	0	8.34392	0.387219	0.148917	ENSDARG00000099374	sp9	9:2591967-2594464	EGFP	SATB2	OK	0	2.96002	inf	#NAME?	5e-05	0.00325273	yes
ENSDARG00000102003	CU695215.2	0	0	0	0.129497	1.70578	1.76769	ENSDARG00000102003	CU695215.2	19:47502580-47527192	EGFP	SATB2	OK	0	1.20099	inf	#NAME?	5e-05	0.00325273	yes
ENSDARG00000102423	FO818711.1	0	0	0	0.90679	0.569083	0.514682	ENSDARG00000102423	FO818711.1	KZ116065.1:2332-20619	EGFP	SATB2	OK	0	0.663518	inf	#NAME?	5e-05	0.00325273	yes
ENSDARG00000113172	RF00017	0	0	0	22.6422	45.3589	10.5756	ENSDARG00000113172	RF00017	11:12168001-12168298	EGFP	SATB2	OK	0	26.1923	inf	#NAME?	5e-05	0.00325273	yes
ENSDARG00000113506	RF00017	0	0	0	17.1354	8.81658	3.69824	ENSDARG00000113506	RF00017	11:12162751-12163048	EGFP	SATB2	OK	0	9.8834	inf	#NAME?	5e-05	0.00325273	yes
ENSDARG00000038968	ccr6b	0	0	0	0.992035	0.200808	1.02128	ENSDARG00000038968	ccr6b	17:51642686-51651631	EGFP	SATB2	OK	0	0.73804	inf	#NAME?	0.0001	0.00571692	yes
ENSDARG00000057983	svopl	0	0	0	1.06172	0.492613	0.0797289	ENSDARG00000057983	svopl	4:9769049-9781132	EGFP	SATB2	OK	0	0.544686	inf	#NAME?	0.00015	0.00775308	yes
ENSDARG00000073821	znf1177	0	0	0	0.847268	2.98078	1.44734	ENSDARG00000073821	znf1177	22:2451731-2452591	EGFP	SATB2	OK	0	1.75846	inf	#NAME?	0.00015	0.00775308	yes
ENSDARG00000097833	BX571712.1	0	0	0	12.2783	0.375393	0.341051	ENSDARG00000097833	BX571712.1	17:31096325-31097541	EGFP	SATB2	OK	0	4.33159	inf	#NAME?	0.00015	0.00775308	yes
ENSDARG00000117463	BX323087.2	0	0	0	1.64647	0.272185	1.36331	ENSDARG00000117463	BX323087.2	23:6399838-6410752	EGFP	SATB2	OK	0	1.09399	inf	#NAME?	0.00015	0.00775308	yes
ENSDARG00000077252	si:rp71-36a1.5	0	0	0	1.27081	0.975849	1.75579	ENSDARG00000077252	si:rp71-36a1.5	22:5835692-5839686	EGFP	SATB2	OK	0	1.33415	inf	#NAME?	0.00025	0.0112297	yes
ENSDARG00000094910	si:dkey-22i16.7	0	0	0	0	5.56297	0	ENSDARG00000094910	si:dkey-22i16.7	1:43945628-43948826	EGFP	SATB2	OK	0	1.85432	inf	#NAME?	0.00045	0.0174744	yes
ENSDARG00000103809	CT990567.3	0	0	0	0	0.209633	5.17532	ENSDARG00000103809	CT990567.3	4:61979755-61982992	EGFP	SATB2	OK	0	1.79498	inf	#NAME?	0.00045	0.0174744	yes
ENSDARG00000117475	CR376825.1	0	0	0	0.979937	1.90543	3.8383	ENSDARG00000117475	CR376825.1	14:18850748-18941644	EGFP	SATB2	OK	0	2.24122	inf	#NAME?	0.00045	0.0174744	yes
ENSDARG00000093983	CR749763.3	0	0	0	0.342043	0.428419	3.84518	ENSDARG00000093983	CR749763.3	4:16019214-16022657	EGFP	SATB2	OK	0	1.53855	inf	#NAME?	0.00055	0.0199223	yes
ENSDARG00000095739	si:dkey-73p2.1	0	0	0	2.07125	0.19565	0.309163	ENSDARG00000095739	si:dkey-73p2.1	3:4266288-4268994	EGFP	SATB2	OK	0	0.858689	inf	#NAME?	0.00065	0.0224319	yes
ENSDARG00000090253	zgc:113223	0	0	0	0.467166	0.847865	0.130345	ENSDARG00000090253	zgc:113223	11:7253076-7261717	EGFP	SATB2	OK	0	0.481792	inf	#NAME?	0.0007	0.0235823	yes
ENSDARG00000117135	si:dkey-78l4.13	0	0	0	0.376336	1.0025	0.344498	ENSDARG00000117135	si:dkey-78l4.13	22:19522981-19530681	EGFP	SATB2	OK	0	0.574446	inf	#NAME?	0.0008	0.0257994	yes
ENSDARG00000103104	tradv23.1.3	0	0	0	11.7419	0	0	ENSDARG00000103104	tradv23.1.3	2:36273161-36273643	EGFP	SATB2	OK	0	3.91396	inf	#NAME?	0.00085	0.0269135	yes
ENSDARG00000089749	aqp8b	0	0	0	0.549277	0.483832	0.747732	ENSDARG00000089749	aqp8b	3:18572278-18575868	EGFP	SATB2	OK	0	0.593613	inf	#NAME?	0.00105	0.0306722	yes
ENSDARG00000093013	BX294181.1	0	0	0	0	4.99186	0.890465	ENSDARG00000093013	BX294181.1	5:38182600-38187056	EGFP	SATB2	OK	0	1.96077	inf	#NAME?	0.0013	0.0349533	yes
ENSDARG00000116946	RF00017	0	0	0	2.46391	6.40706	0.958241	ENSDARG00000116946	RF00017	11:12567986-12568283	EGFP	SATB2	OK	0	3.2764	inf	#NAME?	0.00145	0.0374305	yes
ENSDARG00000098496	tradv25.0.1	0	0	0	4.60379	0.85012	2.83618	ENSDARG00000098496	tradv25.0.1	2:36278979-36279485	EGFP	SATB2	OK	0	2.76336	inf	#NAME?	0.0018	0.0435831	yes
ENSDARG00000096191	si:ch211-112b1.2	0	0	0	3.88533	1.56508	2.17196	ENSDARG00000096191	si:ch211-112b1.2	1:48921943-48922273	EGFP	SATB2	OK	0	2.54079	inf	#NAME?	0.00185	0.0443197	yes
ENSDARG00000039412	dmrta2	0	0	0	0.176218	0.916072	0	ENSDARG00000039412	dmrta2	8:16257219-16259063	EGFP	SATB2	OK	0	0.364097	inf	#NAME?	0.0019	0.0448531	yes
ENSDARG00000078649	il21r.2	0	0	0	0.519246	0	3.09064	ENSDARG00000078649	il21r.2	3:45315476-45326897	EGFP	SATB2	OK	0	1.2033	inf	#NAME?	0.0019	0.0448531	yes
ENSDARG00000092686	BX649292.1	0	0	0	2.08821	0.76125	3.92979	ENSDARG00000092686	BX649292.1	22:22533585-22534463	EGFP	SATB2	OK	0	2.25975	inf	#NAME?	0.00205	0.0471167	yes
ENSDARG00000112699	taar18g	0	0	0	0.31667	0.859685	0.273984	ENSDARG00000112699	taar18g	10:40527236-40528259	EGFP	SATB2	OK	0	0.483446	inf	#NAME?	0.00205	0.0471167	yes
ENSDARG00000076043	si:dkeyp-73d8.9	0	0	0	0.555692	0.561983	0.32301	ENSDARG00000076043	si:dkeyp-73d8.9	2:32642337-32643738	EGFP	SATB2	OK	0	0.480229	inf	#NAME?	0.0022	0.0487814	yes
ENSDARG00000114516	CABZ01021592.1	4.25811	2.35562	2.67972	33.8473	6235.26	3189.59	ENSDARG00000114516	CABZ01021592.1	2:7663941-7666021	EGFP	SATB2	OK	3.09782	3152.9	9.99121	5.89065	5e-05	0.00325273	yes
ENSDARG00000025912	bscl2l	1.47061	0.376621	0.883433	11.6427	1089.42	1329.31	ENSDARG00000025912	bscl2l	14:6159161-6175947	EGFP	SATB2	OK	0.910221	810.125	9.79771	6.883	0.0001	0.00571692	yes
ENSDARG00000076250	rasef	0.298774	0.1642	0.475874	1.74401	121.158	188.046	ENSDARG00000076250	rasef	8:49570883-49606121	EGFP	SATB2	OK	0.31295	103.649	8.37156	6.02386	5e-05	0.00325273	yes
ENSDARG00000070818	pax7b	0.723074	0.115283	0.24913	1.06967	101.775	187.464	ENSDARG00000070818	pax7b	23:20863144-20936845	EGFP	SATB2	OK	0.362495	96.7696	8.06045	5.48432	0.0001	0.00571692	yes
ENSDARG00000059342	avil	0.211287	0.186298	0.167099	2.07153	79.467	61.541	ENSDARG00000059342	avil	11:169393-183328	EGFP	SATB2	OK	0.188228	47.6932	7.98516	6.03432	0.0002	0.00939378	yes
ENSDARG00000063310	oxr1b	1.77079	1.30693	2.34209	5.91071	133.253	705.359	ENSDARG00000063310	oxr1b	19:7309049-7406933	EGFP	SATB2	OK	1.80661	281.508	7.28375	4.31593	5e-05	0.00325273	yes
ENSDARG00000093957	si:dkey-251i10.2	2.75455	11.9809	5.34599	25.291	1478.63	1272.16	ENSDARG00000093957	si:dkey-251i10.2	5:67463026-67471375	EGFP	SATB2	OK	6.6938	925.36	7.11104	6.08358	5e-05	0.00325273	yes
ENSDARG00000105040	fam69c	0.325332	0.350759	0.821252	2.14089	121.053	52.6146	ENSDARG00000105040	fam69c	24:2889334-2917540	EGFP	SATB2	OK	0.499114	58.6028	6.87545	5.72315	5e-05	0.00325273	yes
ENSDARG00000063319	si:ch73-216m24.3	0.258698	0.091819	0.288836	0.752852	7.63384	58.6851	ENSDARG00000063319	si:ch73-216m24.3	19:7299864-7308253	EGFP	SATB2	OK	0.213118	22.3573	6.71295	4.76953	0.0023	0.049923	yes
ENSDARG00000097208	alkbh3	1.55321	1.3445	1.86474	6.68675	137.349	336.332	ENSDARG00000097208	alkbh3	25:30298376-30299662	EGFP	SATB2	OK	1.58748	160.123	6.65629	5.78379	5e-05	0.00325273	yes
ENSDARG00000040777	inhbb	0.568925	0.339713	0.240048	2.75814	20.9436	65.4275	ENSDARG00000040777	inhbb	9:36967293-36974879	EGFP	SATB2	OK	0.382895	29.7098	6.27784	4.52209	5e-05	0.00325273	yes
ENSDARG00000100398	pax7a	1.24368	0.356653	0.316492	1.59102	101.087	44.1467	ENSDARG00000100398	pax7a	11:41242643-41372948	EGFP	SATB2	OK	0.638941	48.9417	6.25924	4.52216	5e-05	0.00325273	yes
ENSDARG00000038974	DPYSL2 (1 of many)	0.231196	0.0777797	0.326272	4.26942	19.2247	24.4818	ENSDARG00000038974	DPYSL2 (1 of many)	8:5119359-5155545	EGFP	SATB2	OK	0.211749	15.992	6.23885	4.20996	0.00115	0.0323817	yes
ENSDARG00000102398	cnn1b	0.531199	0.114989	0.516747	1.87752	43.6631	35.5557	ENSDARG00000102398	cnn1b	3:14463940-14486959	EGFP	SATB2	OK	0.387645	27.0321	6.12379	4.2565	0.00145	0.0374305	yes
ENSDARG00000076844	plin6	3.53434	4.56298	0.272602	12.7629	288.315	248.66	ENSDARG00000076844	plin6	16:28797702-28836529	EGFP	SATB2	OK	2.78997	183.246	6.03739	2.20611	5e-05	0.00325273	yes
ENSDARG00000008403	phospho1	0.177596	0.488402	0.72185	12.7669	25.9257	49.3823	ENSDARG00000008403	phospho1	3:15805916-15811037	EGFP	SATB2	OK	0.462616	29.3583	5.98781	3.07032	0.00045	0.0174744	yes
ENSDARG00000101749	zgc:92161	1.42693	7.66616	7.08573	866.186	24.5042	99.588	ENSDARG00000101749	zgc:92161	3:49043916-49058326	EGFP	SATB2	OK	5.39294	330.093	5.93566	4.0817	5e-05	0.00325273	yes
ENSDARG00000056028	slc22a7a	1.264	1.50178	2.90413	2.25866	195.981	147.267	ENSDARG00000056028	slc22a7a	11:30729744-30742966	EGFP	SATB2	OK	1.88997	115.169	5.92925	5.37549	5e-05	0.00325273	yes
ENSDARG00000014588	adcy2b	0.438508	0.255072	0.281102	0.7476	18.6748	36.3099	ENSDARG00000014588	adcy2b	19:27608926-27777228	EGFP	SATB2	OK	0.324894	18.5774	5.83744	4.91563	5e-05	0.00325273	yes
ENSDARG00000103277	cyp24a1	0.530827	0.766093	0.504224	91.8499	2.90542	6.29189	ENSDARG00000103277	cyp24a1	6:55852273-55864687	EGFP	SATB2	OK	0.600381	33.6824	5.80997	4.36459	5e-05	0.00325273	yes
ENSDARG00000074777	ank1b	0.908246	0.0460988	0.424123	0.690902	40.9073	31.3528	ENSDARG00000074777	ank1b	21:21027374-21148623	EGFP	SATB2	OK	0.459489	24.317	5.72579	2.80192	5e-05	0.00325273	yes
ENSDARG00000089205	si:dkey-73n8.3	1.30129	0.5999	0.58942	1.57927	61.4051	62.694	ENSDARG00000089205	si:dkey-73n8.3	24:18469765-18485491	EGFP	SATB2	OK	0.830202	41.8928	5.65709	4.24056	5e-05	0.00325273	yes
ENSDARG00000057121	c7b	1.16883	10.8972	4.24772	494.009	75.6718	219.518	ENSDARG00000057121	c7b	21:20901504-20932603	EGFP	SATB2	OK	5.43793	263.066	5.59622	4.5551	5e-05	0.00325273	yes
ENSDARG00000001975	hsd11b2	1.43149	0.934344	0.465921	6.43686	19.5385	80.5366	ENSDARG00000001975	hsd11b2	7:35112051-35126374	EGFP	SATB2	OK	0.943919	35.504	5.23317	4.47659	5e-05	0.00325273	yes
ENSDARG00000061371	cdh18a	0.646875	0.0318657	0.531303	0.0744453	12.4369	30.9654	ENSDARG00000061371	cdh18a	2:29249203-29353179	EGFP	SATB2	OK	0.403348	14.4922	5.16711	1.6939	0.0006	0.021125	yes
ENSDARG00000117613	CABZ01030033.1	0.627425	2.97758	0.614101	0.885984	13.7078	134.441	ENSDARG00000117613	CABZ01030033.1	23:5132438-5141915	EGFP	SATB2	OK	1.40637	49.6783	5.14257	3.48968	5e-05	0.00325273	yes
ENSDARG00000045557	socs2	2.0837	0.634822	1.37141	10.6791	10.8273	115.186	ENSDARG00000045557	socs2	4:18419541-18436899	EGFP	SATB2	OK	1.36331	45.5643	5.06272	3.70115	5e-05	0.00325273	yes
ENSDARG00000028896	plpp2b	1.13331	0.23557	0.569929	3.03702	54.8343	2.92398	ENSDARG00000028896	plpp2b	22:21549418-21584670	EGFP	SATB2	OK	0.646271	20.2651	4.97071	3.37055	0.00015	0.00775308	yes
ENSDARG00000087319	tmem121b	0.220926	0.332481	0.0672723	3.20335	5.3799	10.37	ENSDARG00000087319	tmem121b	4:12308975-12312976	EGFP	SATB2	OK	0.206893	6.31775	4.93245	3.26569	0.00035	0.0147006	yes
ENSDARG00000063299	pcloa	0.316314	0.240112	0.0315843	7.52053	3.98181	5.89291	ENSDARG00000063299	pcloa	4:11375893-11450040	EGFP	SATB2	OK	0.196003	5.79842	4.88671	1.1318	5e-05	0.00325273	yes
ENSDARG00000117155	BX323087.1	0.226537	1.00404	0.474482	13.2536	6.21517	30.3611	ENSDARG00000117155	BX323087.1	23:6333405-6354179	EGFP	SATB2	OK	0.568354	16.61	4.86912	2.95804	0.00205	0.0471167	yes
ENSDARG00000006060	crybg1b	0.687776	0.59846	1.25104	18.8371	27.6093	25.4218	ENSDARG00000006060	crybg1b	4:861443-890220	EGFP	SATB2	OK	0.845758	23.9561	4.824	4.25236	5e-05	0.00325273	yes
ENSDARG00000028027	trim63a	1.44123	0.137034	2.69319	6.45882	14.2988	99.0163	ENSDARG00000028027	trim63a	6:15651976-15653494	EGFP	SATB2	OK	1.42382	39.9246	4.80944	3.82825	5e-05	0.00325273	yes
ENSDARG00000101791	kyat3	10.2712	10.7657	18.1349	604.423	5.06712	453.674	ENSDARG00000101791	kyat3	6:25257727-25304430	EGFP	SATB2	OK	13.0573	354.388	4.76241	4.14614	5e-05	0.00325273	yes
ENSDARG00000016936	hmcn1	0.217338	0.068164	0.209807	2.66527	2.57972	8.11677	ENSDARG00000016936	hmcn1	20:34157307-34292607	EGFP	SATB2	OK	0.165103	4.45392	4.75364	1.76002	5e-05	0.00325273	yes
ENSDARG00000074949	c1qtnf7	1.12009	0.597408	1.57632	7.2373	22.4709	55.8232	ENSDARG00000074949	c1qtnf7	23:2185396-2189062	EGFP	SATB2	OK	1.09794	28.5105	4.69862	4.12721	5e-05	0.00325273	yes
ENSDARG00000027065	slc38a3a	0.529236	0.0942755	0.0715247	5.90377	1.62938	10.0945	ENSDARG00000027065	slc38a3a	11:34824098-34914857	EGFP	SATB2	OK	0.231679	5.87588	4.66461	3.00868	5e-05	0.00325273	yes
ENSDARG00000057113	c6	0.583229	3.61142	8.15635	187.149	42.4962	77.3885	ENSDARG00000057113	c6	21:20901504-20932603	EGFP	SATB2	OK	4.117	102.344	4.6357	1.11431	0.0001	0.00571692	yes
ENSDARG00000103844	si:ch211-266c8.1	0.496373	0.906249	0.218636	15.1941	13.8771	9.77589	ENSDARG00000103844	si:ch211-266c8.1	4:75458536-75474456	EGFP	SATB2	OK	0.540419	12.949	4.58262	4.24662	5e-05	0.00325273	yes
ENSDARG00000062481	mlphb	4.38935	4.69327	2.78999	13.0764	199.84	65.8931	ENSDARG00000062481	mlphb	9:24008878-24023369	EGFP	SATB2	OK	3.95754	92.9364	4.55357	3.5677	5e-05	0.00325273	yes
ENSDARG00000079199	megf6a	0.365837	0.120686	0.272216	1.64281	3.57659	12.4656	ENSDARG00000079199	megf6a	23:21119591-21215520	EGFP	SATB2	OK	0.252913	5.89501	4.54278	3.41963	0.0001	0.00571692	yes
ENSDARG00000069356	adgrl2a	1.11558	0.196522	0.366841	0.494417	11.6178	26.299	ENSDARG00000069356	adgrl2a	11:7432532-7737642	EGFP	SATB2	OK	0.559647	12.8038	4.51591	2.17065	5e-05	0.00325273	yes
ENSDARG00000062363	phex	0.51884	0.0447094	0.139266	9.32138	5.34356	1.20622	ENSDARG00000062363	phex	24:25404357-25442346	EGFP	SATB2	OK	0.234272	5.29039	4.49712	1.94143	0.00115	0.0323817	yes
ENSDARG00000105178	erc2	0.131734	0.314049	0.0625825	3.73421	5.22012	2.42118	ENSDARG00000105178	erc2	11:37310880-37425407	EGFP	SATB2	OK	0.169455	3.79184	4.48392	3.3301	5e-05	0.00325273	yes
ENSDARG00000070453	gch1	0.960241	0.279654	1.66757	4.7187	32.6848	26.5675	ENSDARG00000070453	gch1	17:15033821-15189502	EGFP	SATB2	OK	0.969154	21.3237	4.45959	0.631007	0.00205	0.0471167	yes
ENSDARG00000095577	cybrd1	2.51148	2.48332	1.54652	26.4727	52.1624	63.2829	ENSDARG00000095577	cybrd1	9:3490823-3496579	EGFP	SATB2	OK	2.18044	47.306	4.43933	4.12786	5e-05	0.00325273	yes
ENSDARG00000105121	FAM135B	0.561241	0.15181	0.885496	1.56691	11.847	20.809	ENSDARG00000105121	FAM135B	KN150230.1:48969-123549	EGFP	SATB2	OK	0.532849	11.4076	4.42013	2.84222	5e-05	0.00325273	yes
ENSDARG00000114182	mkxb	1.8892	0	0.942975	0.110965	19.7001	39.2669	ENSDARG00000114182	mkxb	2:3986082-4009200	EGFP	SATB2	OK	0.944059	19.6927	4.38264	3.46044	5e-05	0.00325273	yes
ENSDARG00000099421	si:ch73-236c18.9	0.0588113	0.221349	0.802187	1.69033	0.246605	20.6177	ENSDARG00000099421	si:ch73-236c18.9	1:58508789-58526999	EGFP	SATB2	OK	0.360783	7.5182	4.38118	2.99778	0.00025	0.0112297	yes
ENSDARG00000099323	dlg2	3.19548	1.16573	2.56713	17.4017	25.9379	99.7381	ENSDARG00000099323	dlg2	10:29431528-29705509	EGFP	SATB2	OK	2.30945	47.6926	4.36814	3.01388	5e-05	0.00325273	yes
ENSDARG00000100890	si:zfos-1069f5.1	3.12856	0.352842	8.47042	8.70056	7.45482	230.633	ENSDARG00000100890	si:zfos-1069f5.1	14:3123516-3134836	EGFP	SATB2	OK	3.98394	82.2626	4.36797	3.01141	5e-05	0.00325273	yes
ENSDARG00000105277	cnksr3	1.07515	0.794748	0.827323	8.24715	17.1704	29.6944	ENSDARG00000105277	cnksr3	20:3828236-3911546	EGFP	SATB2	OK	0.899075	18.3707	4.35282	4.01167	5e-05	0.00325273	yes
ENSDARG00000104823	znf648	0.621432	0.113289	0.500977	6.74473	0.520417	16.8007	ENSDARG00000104823	znf648	6:23887313-23889678	EGFP	SATB2	OK	0.411899	8.02196	4.28359	3.30863	0.00045	0.0174744	yes
ENSDARG00000098186	TMEM19	7.28794	8.11342	8.37849	31.6675	58.3055	365.77	ENSDARG00000098186	TMEM19	KN149790.1:106985-114723	EGFP	SATB2	OK	7.92662	151.914	4.26041	4.10997	5e-05	0.00325273	yes
ENSDARG00000069946	itga6b	1.57997	2.51138	6.17743	141.13	29.4292	24.6562	ENSDARG00000069946	itga6b	1:31019164-31064706	EGFP	SATB2	OK	3.42293	65.0718	4.24873	3.04034	5e-05	0.00325273	yes
ENSDARG00000039964	fgfbp2a	0.696421	0.432968	0.423375	26.5249	2.30315	0.595901	ENSDARG00000039964	fgfbp2a	14:46449069-46451249	EGFP	SATB2	OK	0.517588	9.80798	4.24408	2.75433	0.0011	0.0317639	yes
ENSDARG00000103952	CABZ01054391.1	0.509931	0.41291	0.482677	10.6231	7.77646	7.59672	ENSDARG00000103952	CABZ01054391.1	4:72668094-72685014	EGFP	SATB2	OK	0.468506	8.66543	4.20913	2.57425	0.0021	0.047685	yes
ENSDARG00000102986	csf1ra	11.9104	33.3554	69.6874	92.9061	802.868	1179.6	ENSDARG00000102986	csf1ra	14:3143336-3180947	EGFP	SATB2	OK	38.3177	691.792	4.17425	3.18149	5e-05	0.00325273	yes
ENSDARG00000007480	rpe65a	0.685105	0.556139	0	1.56764	11.7596	9.01724	ENSDARG00000007480	rpe65a	2:1428695-1443692	EGFP	SATB2	OK	0.413748	7.44816	4.17006	3.10082	5e-05	0.00325273	yes
ENSDARG00000089109	bcl2b	0.907956	0.0299014	0.732687	0.473406	14.4714	14.2979	ENSDARG00000089109	bcl2b	2:13185301-13216269	EGFP	SATB2	OK	0.556848	9.74755	4.12968	3.70507	5e-05	0.00325273	yes
ENSDARG00000036840	krt15	0.201035	1.07198	6.46313	40.0966	14.163	78.4439	ENSDARG00000036840	krt15	11:11515777-11518469	EGFP	SATB2	OK	2.57872	44.2345	4.10045	3.32328	5e-05	0.00325273	yes
ENSDARG00000074563	gpr37a	0.430706	0.482783	0.140183	11.0317	2.33124	4.62371	ENSDARG00000074563	gpr37a	25:27493443-27500288	EGFP	SATB2	OK	0.351224	5.99554	4.09343	3.04314	0.00055	0.0199223	yes
ENSDARG00000034588	scn4ab	0.935359	0.064021	2.82438	47.472	5.52707	10.0733	ENSDARG00000034588	scn4ab	3:22222243-22316844	EGFP	SATB2	OK	1.27459	21.0241	4.04394	3.77841	5e-05	0.00325273	yes
ENSDARG00000099708	cacna1hb	0.518408	0.0498533	0.109281	4.76985	2.48981	3.49082	ENSDARG00000099708	cacna1hb	1:8304903-8404005	EGFP	SATB2	OK	0.225847	3.58349	3.98795	3.25251	0.00145	0.0374305	yes
ENSDARG00000026500	xkr9	0.512757	0.389616	0.15989	1.50834	5.72397	9.42836	ENSDARG00000026500	xkr9	24:14202326-14212521	EGFP	SATB2	OK	0.354087	5.55356	3.97123	2.57056	0.0022	0.0487814	yes
ENSDARG00000030614	syt1a	0.301291	0.0243088	0.111841	0.318246	1.42374	5.07687	ENSDARG00000030614	syt1a	4:21129751-21315399	EGFP	SATB2	OK	0.145814	2.27295	3.96237	2.60603	0.00125	0.0343431	yes
ENSDARG00000104825	trim35-7	0.226358	0.693761	0.53505	0.505344	5.46532	16.7055	ENSDARG00000104825	trim35-7	3:5420405-5433392	EGFP	SATB2	OK	0.485056	7.55874	3.96192	2.86845	0.0006	0.021125	yes
ENSDARG00000056836	si:ch211-125o16.4	0.252757	0.217534	0.562576	12.167	2.79868	0.429479	ENSDARG00000056836	si:ch211-125o16.4	17:22544647-22552678	EGFP	SATB2	OK	0.344289	5.13173	3.89775	3.39312	5e-05	0.00325273	yes
ENSDARG00000069701	lgi2b	1.16741	0.297263	0.811651	12.2779	8.50347	12.4723	ENSDARG00000069701	lgi2b	1:40023639-40028859	EGFP	SATB2	OK	0.758775	11.0846	3.86873	3.19603	0.0006	0.021125	yes
ENSDARG00000059931	hyal2a	6.90994	8.1213	1.26741	91.6941	51.4089	94.9774	ENSDARG00000059931	hyal2a	6:54093056-54111928	EGFP	SATB2	OK	5.43289	79.3602	3.86862	4.16843	5e-05	0.00325273	yes
ENSDARG00000111072	RF00017	25.4747	25.5834	99.1841	881.657	1222.52	71.598	ENSDARG00000111072	RF00017	11:11338803-11339100	EGFP	SATB2	OK	50.0807	725.259	3.85617	3.6594	5e-05	0.00325273	yes
ENSDARG00000076179	ngef	0.534704	0.133407	0.232236	8.28493	3.96916	0.714039	ENSDARG00000076179	ngef	15:40074922-40133784	EGFP	SATB2	OK	0.300116	4.32271	3.84835	2.94984	0.00045	0.0174744	yes
ENSDARG00000057148	mocos	1.07355	0.429963	0.406783	0.32551	12.5081	14.6715	ENSDARG00000057148	mocos	13:16261244-16278920	EGFP	SATB2	OK	0.636767	9.16838	3.84783	3.03398	5e-05	0.00325273	yes
ENSDARG00000056250	add3b	0.546249	0.0869079	0.551578	0.430397	5.32638	11.0823	ENSDARG00000056250	add3b	17:20248176-20430177	EGFP	SATB2	OK	0.394912	5.61301	3.82917	2.85726	0.0002	0.00939378	yes
ENSDARG00000069929	CABZ01053976.1	0.578998	0.675258	0.150262	17.6288	0.809709	1.52258	ENSDARG00000069929	CABZ01053976.1	16:53125917-53153619	EGFP	SATB2	OK	0.468172	6.65371	3.82905	2.55592	0.00115	0.0323817	yes
ENSDARG00000117400	CU651668.1	5.03394	4.09261	6.78241	13.9453	24.1923	187.1	ENSDARG00000117400	CU651668.1	4:71953614-71962414	EGFP	SATB2	OK	5.30299	75.0791	3.82353	3.32305	0.00015	0.00775308	yes
ENSDARG00000077257	timd4	0.20701	0.495661	0.225924	8.48292	2.79557	1.80756	ENSDARG00000077257	timd4	21:29090651-29100110	EGFP	SATB2	OK	0.309532	4.36202	3.81684	1.1574	0.0016	0.0402471	yes
ENSDARG00000016691	cd9b	2.65411	1.88776	7.63563	44.164	62.53	64.6935	ENSDARG00000016691	cd9b	4:4234993-4261673	EGFP	SATB2	OK	4.05916	57.1292	3.81497	3.63849	5e-05	0.00325273	yes
ENSDARG00000059054	pdk2b	1.03323	2.48853	2.64233	5.90221	10.2992	70.4333	ENSDARG00000059054	pdk2b	19:5674906-5687743	EGFP	SATB2	OK	2.0547	28.8783	3.81299	3.2711	5e-05	0.00325273	yes
ENSDARG00000005913	tgm1l3	0.112131	0.483063	0.107206	3.0836	1.4594	5.27023	ENSDARG00000005913	tgm1l3	23:40234601-40250886	EGFP	SATB2	OK	0.234133	3.27107	3.80436	2.6156	0.00135	0.0357458	yes
ENSDARG00000114352	RF00017	4.25794	5.54084	22.0725	175.563	247.904	21.3754	ENSDARG00000114352	RF00017	11:12223461-12223758	EGFP	SATB2	OK	10.6238	148.281	3.80296	2.85407	0.0002	0.00939378	yes
ENSDARG00000071029	si:dkey-147f3.4	0.452964	2.84701	3.88148	33.2188	1.08167	64.3131	ENSDARG00000071029	si:dkey-147f3.4	23:16928505-16945441	EGFP	SATB2	OK	2.39382	32.8712	3.77944	3.07126	5e-05	0.00325273	yes
ENSDARG00000062024	kif1ab	2.33996	0.409224	0.387489	0.912207	12.0892	29.7201	ENSDARG00000062024	kif1ab	2:22694381-22758590	EGFP	SATB2	OK	1.04556	14.2405	3.76765	2.20556	5e-05	0.00325273	yes
ENSDARG00000059067	jupb	0.921999	0.244139	0.938861	7.89238	12.0129	8.46004	ENSDARG00000059067	jupb	19:5480326-5590012	EGFP	SATB2	OK	0.701666	9.45511	3.75224	3.41775	5e-05	0.00325273	yes
ENSDARG00000062593	stox1	0.913313	0.127147	0.0319588	0.808795	2.44947	11.1116	ENSDARG00000062593	stox1	13:18471545-18504243	EGFP	SATB2	OK	0.357473	4.78996	3.74411	2.78669	0.0008	0.0257994	yes
ENSDARG00000112374	RF00017	23.315	43.0662	94.3494	1114.79	879.648	144.712	ENSDARG00000112374	RF00017	11:16127381-16127678	EGFP	SATB2	OK	53.5769	713.051	3.73432	3.47471	5e-05	0.00325273	yes
ENSDARG00000075261	timp2b	3.60417	5.02812	25.866	126.758	90.7549	240.888	ENSDARG00000075261	timp2b	3:57632964-57666996	EGFP	SATB2	OK	11.4994	152.8	3.73201	4.2229	5e-05	0.00325273	yes
ENSDARG00000092240	si:ch211-243a20.3	3.72315	0.277672	0.901661	34.6085	22.2612	7.73073	ENSDARG00000092240	si:ch211-243a20.3	1:45351889-45366422	EGFP	SATB2	OK	1.63416	21.5335	3.71996	3.00924	5e-05	0.00325273	yes
ENSDARG00000058042	kitlgb	1.39573	1.30154	0.225294	24.1027	7.1063	6.92283	ENSDARG00000058042	kitlgb	4:9508504-9515398	EGFP	SATB2	OK	0.974187	12.7106	3.70569	2.94684	0.0002	0.00939378	yes
ENSDARG00000104292	ctgfb	1.03935	0.727733	0.153628	21.0316	2.2641	1.75612	ENSDARG00000104292	ctgfb	19:13796656-13808632	EGFP	SATB2	OK	0.640236	8.3506	3.7052	2.73769	0.0005	0.0187099	yes
ENSDARG00000117348	AL954696.2	0.858193	0.134751	0.296975	0.665207	2.43118	13.5936	ENSDARG00000117348	AL954696.2	2:58272077-58340517	EGFP	SATB2	OK	0.429973	5.56333	3.69363	2.48738	0.00065	0.0224319	yes
ENSDARG00000053488	si:ch73-22a13.3	2.83624	4.23016	0.965639	4.08961	23.6261	75.7445	ENSDARG00000053488	si:ch73-22a13.3	14:6182345-6195286	EGFP	SATB2	OK	2.67735	34.4868	3.68717	3.34416	5e-05	0.00325273	yes
ENSDARG00000027867	paplna	3.96573	1.23919	0.823523	63.7547	11.9025	1.50348	ENSDARG00000027867	paplna	17:51138091-51199558	EGFP	SATB2	OK	2.00948	25.7202	3.67801	2.70172	0.00025	0.0112297	yes
ENSDARG00000059738	ptprsa	0.187827	0.20642	0.716067	7.39765	2.61973	3.9311	ENSDARG00000059738	ptprsa	22:3389346-3680725	EGFP	SATB2	OK	0.370105	4.64949	3.65107	1.56666	5e-05	0.00325273	yes
ENSDARG00000027222	adgrg1	0.988531	0.33615	0.453054	3.56706	6.65744	11.9252	ENSDARG00000027222	adgrg1	7:28668978-28696556	EGFP	SATB2	OK	0.592578	7.38323	3.63917	3.22138	0.00015	0.00775308	yes
ENSDARG00000010031	ssh1b	0.264933	0.125318	0.2113	1.30669	4.16099	1.98335	ENSDARG00000010031	ssh1b	5:31914905-31928913	EGFP	SATB2	OK	0.200517	2.48367	3.63068	2.85883	0.00085	0.0269135	yes
ENSDARG00000036878	sh3bgrl2	0.35464	0.906568	0.759378	0	10.8318	14.0635	ENSDARG00000036878	sh3bgrl2	23:31405496-31423729	EGFP	SATB2	OK	0.673528	8.29844	3.62303	2.8702	0.00065	0.0224319	yes
ENSDARG00000052919	adrb3b	0.435255	0.162262	0.729877	13.5683	1.7622	1.00453	ENSDARG00000052919	adrb3b	10:41199659-41214668	EGFP	SATB2	OK	0.442465	5.44501	3.6213	2.58802	0.00185	0.0443197	yes
ENSDARG00000010266	igf2bp3	2.37702	0.362006	0.429453	4.54797	20.5755	13.7813	ENSDARG00000010266	igf2bp3	19:20201253-20247336	EGFP	SATB2	OK	1.05616	12.9682	3.61808	2.70305	5e-05	0.00325273	yes
ENSDARG00000087804	tnfrsf11a	1.53769	0.567589	1.6484	14.06	16.7038	14.8742	ENSDARG00000087804	tnfrsf11a	24:18485865-18510631	EGFP	SATB2	OK	1.25123	15.2126	3.60385	3.96493	5e-05	0.00325273	yes
ENSDARG00000059233	runx2b	0.166333	0.547885	0.255966	7.62672	2.67322	1.44697	ENSDARG00000059233	runx2b	20:43994847-44109219	EGFP	SATB2	OK	0.323395	3.91564	3.59788	2.17633	0.00015	0.00775308	yes
ENSDARG00000018923	fat2	0.378715	0.144646	0.861192	12.783	2.89977	1.05766	ENSDARG00000018923	fat2	14:26103329-26177156	EGFP	SATB2	OK	0.461518	5.58014	3.59584	1.56884	5e-05	0.00325273	yes
ENSDARG00000087697	lpl	0.66578	0.428682	0.683509	6.34444	0.764841	14.3765	ENSDARG00000087697	lpl	22:15624370-15630421	EGFP	SATB2	OK	0.592657	7.16193	3.59508	3.3379	5e-05	0.00325273	yes
ENSDARG00000056181	ncam1a	1.17332	0.606589	0.214619	16.1869	4.16983	3.63214	ENSDARG00000056181	ncam1a	21:23338058-23746947	EGFP	SATB2	OK	0.664842	7.9963	3.58825	1.73367	0.0002	0.00939378	yes
ENSDARG00000103459	evplb	0.0942716	0.0913102	0.380777	4.9027	1.55726	0.307967	ENSDARG00000103459	evplb	KN149912.1:57101-76613	EGFP	SATB2	OK	0.188786	2.25598	3.57893	2.80812	5e-05	0.00325273	yes
ENSDARG00000070794	greb1	0.405491	0.270564	0.631239	4.16604	7.84584	3.60851	ENSDARG00000070794	greb1	17:30369106-30418016	EGFP	SATB2	OK	0.435765	5.2068	3.57877	1.86012	0.00045	0.0174744	yes
ENSDARG00000103699	ptpn13	1.64542	0.12811	1.48138	16.335	5.19677	17.2564	ENSDARG00000103699	ptpn13	21:9387263-9562272	EGFP	SATB2	OK	1.08497	12.9294	3.57493	1.64919	5e-05	0.00325273	yes
ENSDARG00000075296	fam83c	0.808934	0.208371	0.365837	9.33413	5.49116	1.61534	ENSDARG00000075296	fam83c	6:52468138-52484566	EGFP	SATB2	OK	0.461047	5.48021	3.57124	2.76103	0.00095	0.0289462	yes
ENSDARG00000014340	rab11al	0.948575	0.0808602	1.00089	4.79273	7.09666	12.0962	ENSDARG00000014340	rab11al	16:46725086-46741779	EGFP	SATB2	OK	0.676774	7.99519	3.56239	2.90451	0.00045	0.0174744	yes
ENSDARG00000077749	usp54b	0.649368	1.54826	0.374881	5.69665	9.65909	14.6952	ENSDARG00000077749	usp54b	12:26221998-26383242	EGFP	SATB2	OK	0.857503	10.017	3.54616	3.30341	5e-05	0.00325273	yes
ENSDARG00000060566	cluhb	0.338139	0.620164	0.0484402	5.96657	2.28681	3.43032	ENSDARG00000060566	cluhb	21:39361039-39403012	EGFP	SATB2	OK	0.335581	3.89457	3.53673	2.93929	0.0006	0.021125	yes
ENSDARG00000006396	nrcama	0.155173	1.53858	0.0492053	12.3436	7.22145	0.518653	ENSDARG00000006396	nrcama	4:13696536-13728375	EGFP	SATB2	OK	0.580985	6.69457	3.52642	2.64202	0.0001	0.00571692	yes
ENSDARG00000078975	igl1c3	5.57236	11.6136	10.8111	2.70373	17.2597	301.728	ENSDARG00000078975	igl1c3	3:58833305-58835177	EGFP	SATB2	OK	9.33236	107.231	3.52233	2.59888	5e-05	0.00325273	yes
ENSDARG00000097054	CU927934.1	1.58471	1.76356	5.42853	5.16636	24.6745	70.7956	ENSDARG00000097054	CU927934.1	2:14009629-14010658	EGFP	SATB2	OK	2.9256	33.5455	3.51932	2.92809	5e-05	0.00325273	yes
ENSDARG00000102312	scn5lab	0.419853	0.0609309	0.0777934	0.275516	0.295686	5.81629	ENSDARG00000102312	scn5lab	24:40905099-41143256	EGFP	SATB2	OK	0.186193	2.12916	3.51542	2.35249	0.00015	0.00775308	yes
ENSDARG00000088567	vps72b	1.17295	2.57749	0.91043	43.3098	6.00425	3.81461	ENSDARG00000088567	vps72b	16:29630964-29647738	EGFP	SATB2	OK	1.55362	17.7095	3.51082	2.88601	0.0001	0.00571692	yes
ENSDARG00000095032	ftr33	0.973916	0.408732	0.685444	7.72856	5.71425	10.1203	ENSDARG00000095032	ftr33	2:59255192-59265537	EGFP	SATB2	OK	0.689364	7.85436	3.51015	2.48369	0.00125	0.0343431	yes
ENSDARG00000020876	pdk2a	0.834775	1.3983	1.05305	3.81342	7.67169	25.8903	ENSDARG00000020876	pdk2a	12:28559407-28570989	EGFP	SATB2	OK	1.09538	12.4585	3.50763	3.1406	5e-05	0.00325273	yes
ENSDARG00000040177	rgs16	1.54423	0.8163	0.937601	0.371429	8.41064	28.1211	ENSDARG00000040177	rgs16	6:35443429-35446110	EGFP	SATB2	OK	1.09938	12.301	3.48402	2.90034	5e-05	0.00325273	yes
ENSDARG00000041433	si:dkey-7c18.24	1.96441	2.59053	26.553	230.062	103.722	7.99836	ENSDARG00000041433	si:dkey-7c18.24	20:46039590-46043405	EGFP	SATB2	OK	10.3693	113.928	3.45773	3.14019	5e-05	0.00325273	yes
ENSDARG00000053091	si:ch211-204c21.1	2.9649	12.3253	5.58004	127.809	31.7407	67.5279	ENSDARG00000053091	si:ch211-204c21.1	5:43860563-43959972	EGFP	SATB2	OK	6.95673	75.6925	3.44367	2.93408	5e-05	0.00325273	yes
ENSDARG00000002952	smo	0.6252	0.201039	0.373978	2.20313	7.74803	2.92478	ENSDARG00000002952	smo	4:14971238-14979937	EGFP	SATB2	OK	0.400073	4.29198	3.42331	3.22268	5e-05	0.00325273	yes
ENSDARG00000042934	ctgfa	3.01674	5.36713	3.369	53.7075	15.9368	55.9201	ENSDARG00000042934	ctgfa	20:25340813-25343490	EGFP	SATB2	OK	3.91762	41.8548	3.41734	3.63225	5e-05	0.00325273	yes
ENSDARG00000038709	si:dkeyp-66d1.7	3.25991	0.879638	1.86887	7.19072	41.8456	14.639	ENSDARG00000038709	si:dkeyp-66d1.7	2:37750015-37755128	EGFP	SATB2	OK	2.00281	21.2251	3.40568	2.65436	0.00075	0.0247511	yes
ENSDARG00000015065	c4	1.75075	2.84621	13.9357	16.1248	60.0065	118.042	ENSDARG00000015065	c4	15:32297440-32383529	EGFP	SATB2	OK	6.17754	64.7243	3.3892	2.36755	5e-05	0.00325273	yes
ENSDARG00000087596	si:ch73-95l15.5	0.510407	0.283855	0.61695	0.927314	6.51605	7.34161	ENSDARG00000087596	si:ch73-95l15.5	15:34946778-34986101	EGFP	SATB2	OK	0.470404	4.92833	3.38912	2.92797	5e-05	0.00325273	yes
ENSDARG00000004748	zgc:100868	0.696134	0.455651	4.65811	47.006	10.1415	3.53809	ENSDARG00000004748	zgc:100868	3:39472341-39488639	EGFP	SATB2	OK	1.93663	20.2285	3.38477	3.28733	5e-05	0.00325273	yes
ENSDARG00000093124	scpp8	1.72623	1.00948	0.37514	27.1343	4.38231	0.873033	ENSDARG00000093124	scpp8	10:15106807-15111334	EGFP	SATB2	OK	1.03695	10.7966	3.38015	2.37953	0.0002	0.00939378	yes
ENSDARG00000096569	BX248418.1	2.45007	1.92211	0.382906	3.34256	15.9037	30.2549	ENSDARG00000096569	BX248418.1	20:1200365-1202182	EGFP	SATB2	OK	1.58503	16.5004	3.37992	2.31244	0.0018	0.0435831	yes
ENSDARG00000103789	tmem130	10.2276	0.547559	14.9999	10.6777	103.581	153.981	ENSDARG00000103789	tmem130	12:17865373-17875270	EGFP	SATB2	OK	8.59169	89.4132	3.37947	3.81105	5e-05	0.00325273	yes
ENSDARG00000010047	neu3.2	0.967699	0.0721093	0.969695	4.22888	3.43664	13.1725	ENSDARG00000010047	neu3.2	21:21796662-21799292	EGFP	SATB2	OK	0.669834	6.94601	3.37431	2.77416	0.00085	0.0269135	yes
ENSDARG00000020239	lpin1	3.47651	1.49163	12.2607	17.7916	20.2762	139.434	ENSDARG00000020239	lpin1	17:30442517-30473374	EGFP	SATB2	OK	5.74294	59.1672	3.36494	2.18911	0.0005	0.0187099	yes
ENSDARG00000100968	si:ch211-1a19.3	3.5552	20.6514	9.03629	90.0696	105.652	145.746	ENSDARG00000100968	si:ch211-1a19.3	11:13629527-13640471	EGFP	SATB2	OK	11.081	113.822	3.36063	3.66004	5e-05	0.00325273	yes
ENSDARG00000093316	adgrf8	0.0554682	0.132683	0.359307	3.83511	1.51715	0.259588	ENSDARG00000093316	adgrf8	20:35712883-35759754	EGFP	SATB2	OK	0.182486	1.87062	3.35766	2.53991	0.00195	0.0457472	yes
ENSDARG00000070408	ccnd2b	2.29337	7.69678	3.68411	15.6634	104.27	19.0286	ENSDARG00000070408	ccnd2b	4:5132950-5150347	EGFP	SATB2	OK	4.55808	46.3208	3.34516	2.88827	5e-05	0.00325273	yes
ENSDARG00000094719	CR318588.3	980.601	24.4231	320.98	4807.05	4388.32	4265.83	ENSDARG00000094719	CR318588.3	18:7569328-7572139	EGFP	SATB2	OK	442.001	4487.07	3.34365	2.40965	0.00155	0.0394718	yes
ENSDARG00000089691	ism2a	0.258857	0.0260144	0.0988081	0.875642	1.32568	1.68829	ENSDARG00000089691	ism2a	17:17861680-17902509	EGFP	SATB2	OK	0.127893	1.29654	3.34165	2.3919	0.00225	0.0491677	yes
ENSDARG00000097205	ulk2	2.16338	6.5049	6.25279	11.9853	13.737	125.496	ENSDARG00000097205	ulk2	15:20843160-20894776	EGFP	SATB2	OK	4.97369	50.406	3.34121	1.72117	5e-05	0.00325273	yes
ENSDARG00000113323	RF00017	13.0706	64.3348	45.926	446.751	699.956	89.6145	ENSDARG00000113323	RF00017	11:11435446-11435743	EGFP	SATB2	OK	41.1105	412.107	3.32544	3.27084	5e-05	0.00325273	yes
ENSDARG00000100693	ddr2a	0.300992	0.46567	1.08835	4.96542	4.27753	9.19208	ENSDARG00000100693	ddr2a	6:34960024-35032792	EGFP	SATB2	OK	0.618337	6.14501	3.31295	3.3946	5e-05	0.00325273	yes
ENSDARG00000056499	ca6	0.468289	0.296083	1.76247	14.8761	4.59589	5.63769	ENSDARG00000056499	ca6	23:22634441-22650992	EGFP	SATB2	OK	0.842281	8.36989	3.31284	1.9906	0.0022	0.0487814	yes
ENSDARG00000076781	trim45	1.74228	1.03358	1.00003	4.82089	9.20535	23.4856	ENSDARG00000076781	trim45	9:20526471-20539280	EGFP	SATB2	OK	1.25863	12.504	3.31246	2.95682	5e-05	0.00325273	yes
ENSDARG00000106873	LO018188.1	0.398943	0.511733	0.526339	2.9915	3.73564	7.52231	ENSDARG00000106873	LO018188.1	14:49604361-49665640	EGFP	SATB2	OK	0.479005	4.74981	3.30976	3.08512	5e-05	0.00325273	yes
ENSDARG00000022525	mchr1b	0.230396	0.261245	0.363861	3.67077	1.75088	3.00145	ENSDARG00000022525	mchr1b	3:25503441-25512817	EGFP	SATB2	OK	0.285167	2.8077	3.29951	2.0094	0.00225	0.0491677	yes
ENSDARG00000079917	rassf7a	1.24523	2.45625	1.64574	10.7724	6.69538	34.5522	ENSDARG00000079917	rassf7a	25:25453220-25502640	EGFP	SATB2	OK	1.78241	17.34	3.28221	2.23376	0.00015	0.00775308	yes
ENSDARG00000039682	si:ch211-121a2.2	1.34419	1.80315	1.42471	18.395	23.98	1.64026	ENSDARG00000039682	si:ch211-121a2.2	20:7070633-7080470	EGFP	SATB2	OK	1.52402	14.6718	3.26709	2.60786	0.0002	0.00939378	yes
ENSDARG00000090063	fa2h	1.59006	1.10054	2.16023	3.89981	17.3177	25.4725	ENSDARG00000090063	fa2h	25:13558991-13614863	EGFP	SATB2	OK	1.61694	15.5634	3.26681	2.25887	5e-05	0.00325273	yes
ENSDARG00000113858	AL928650.4	0.0168784	0.202861	0.48123	3.58175	1.26864	1.87572	ENSDARG00000113858	AL928650.4	1:8579196-8586066	EGFP	SATB2	OK	0.233657	2.24204	3.26235	2.72978	0.0008	0.0257994	yes
ENSDARG00000101043	ppl	0.293446	0.254125	2.60354	21.6909	7.48072	0.669101	ENSDARG00000101043	ppl	3:36459789-36481986	EGFP	SATB2	OK	1.05037	9.94689	3.24335	2.56261	5e-05	0.00325273	yes
ENSDARG00000039576	fstl1b	33.7257	7.44454	14.888	201.447	251.646	77.3376	ENSDARG00000039576	fstl1b	9:9735492-9842149	EGFP	SATB2	OK	18.6861	176.81	3.24216	3.11244	5e-05	0.00325273	yes
ENSDARG00000101629	CABZ01079192.1	26.5984	2.64845	22.8886	108.323	141.057	243.256	ENSDARG00000101629	CABZ01079192.1	18:1837667-1925826	EGFP	SATB2	OK	17.3785	164.212	3.24019	3.55916	5e-05	0.00325273	yes
ENSDARG00000114451	mmp13a	0.393715	0.887113	1.07938	18.9261	2.60037	0.551235	ENSDARG00000114451	mmp13a	10:38610740-38620514	EGFP	SATB2	OK	0.786735	7.35925	3.22561	2.65905	5e-05	0.00325273	yes
ENSDARG00000029370	ankrd6b	1.33935	1.6044	2.28655	2.95662	13.3259	32.6368	ENSDARG00000029370	ankrd6b	20:1203237-1239603	EGFP	SATB2	OK	1.74343	16.3064	3.22544	1.89657	5e-05	0.00325273	yes
ENSDARG00000078569	mpeg1.3	0.68517	0	0.898754	12.0733	2.19209	0.419643	ENSDARG00000078569	mpeg1.3	8:29655947-29658171	EGFP	SATB2	OK	0.527975	4.895	3.21277	2.48587	0.00135	0.0357458	yes
ENSDARG00000109769	LO017835.1	9.50592	4.78036	4.93736	14.8608	73.1193	90.1927	ENSDARG00000109769	LO017835.1	23:2542157-2547762	EGFP	SATB2	OK	6.40788	59.3909	3.21232	3.0379	5e-05	0.00325273	yes
ENSDARG00000094041	krt17	0.352885	0.301421	9.42877	53.417	35.2048	3.62972	ENSDARG00000094041	krt17	19:5367329-5372572	EGFP	SATB2	OK	3.36103	30.7505	3.19364	2.04715	0.0002	0.00939378	yes
ENSDARG00000110960	BX769173.1	0.471316	4.88117	2.25116	53.0953	6.18328	9.96979	ENSDARG00000110960	BX769173.1	3:48986670-48993580	EGFP	SATB2	OK	2.53455	23.0828	3.18702	2.57469	5e-05	0.00325273	yes
ENSDARG00000055250	si:ch211-132b12.8	0.821176	1.53517	3.53065	49.0134	3.62085	0.823543	ENSDARG00000055250	si:ch211-132b12.8	18:40698549-40708537	EGFP	SATB2	OK	1.96233	17.8193	3.1828	2.05541	0.0007	0.0235823	yes
ENSDARG00000099979	tgfbr3	1.26551	0.383827	0.991909	9.83479	2.29709	11.8218	ENSDARG00000099979	tgfbr3	6:24398906-24598752	EGFP	SATB2	OK	0.880416	7.98456	3.18096	3.06262	5e-05	0.00325273	yes
ENSDARG00000097827	lrp1aa	9.92096	8.80393	75.1289	210.449	227.076	411.706	ENSDARG00000097827	lrp1aa	11:1628537-1864288	EGFP	SATB2	OK	31.2846	283.077	3.17767	0.976838	5e-05	0.00325273	yes
ENSDARG00000017901	tln2a	0.797486	0.482089	0.509294	0.861011	7.83467	7.40169	ENSDARG00000017901	tln2a	7:29863547-29946044	EGFP	SATB2	OK	0.59629	5.36579	3.1697	1.3478	0.0003	0.0130109	yes
ENSDARG00000019135	ankef1a	0.258847	0.135891	0.0304826	3.20052	0.3455	0.273912	ENSDARG00000019135	ankef1a	20:34868932-34902205	EGFP	SATB2	OK	0.14174	1.27331	3.16726	1.97955	0.0023	0.049923	yes
ENSDARG00000076919	igdcc4	1.19886	0.657944	0.222089	1.81772	7.71229	9.14156	ENSDARG00000076919	igdcc4	7:31625661-31759602	EGFP	SATB2	OK	0.692965	6.22386	3.16695	2.86718	5e-05	0.00325273	yes
ENSDARG00000117278	CR854941.1	0.376602	0.869313	0.141901	2.26831	5.10317	4.86615	ENSDARG00000117278	CR854941.1	12:26200884-26219991	EGFP	SATB2	OK	0.462605	4.07921	3.14044	2.4044	0.00205	0.0471167	yes
ENSDARG00000117258	FP236157.4	0.233705	0.806413	1.14701	12.0851	3.37376	3.52536	ENSDARG00000117258	FP236157.4	1:59423276-59429240	EGFP	SATB2	OK	0.729042	6.32808	3.11769	2.35511	0.0018	0.0435831	yes
ENSDARG00000003902	ctsl.1	0.517267	0.836334	0.445203	7.426	2.80502	5.38031	ENSDARG00000003902	ctsl.1	17:27456803-27461321	EGFP	SATB2	OK	0.599601	5.20378	3.11748	1.82852	0.00065	0.0224319	yes
ENSDARG00000099371	cygb1	9.38621	1.47029	4.67066	34.5993	42.8033	56.3969	ENSDARG00000099371	cygb1	3:6639795-6669640	EGFP	SATB2	OK	5.17572	44.5999	3.10721	3.87363	5e-05	0.00325273	yes
ENSDARG00000039145	plaub	1.57273	0.818418	0.913022	1.807	6.46467	20.1004	ENSDARG00000039145	plaub	12:46740583-46766300	EGFP	SATB2	OK	1.10139	9.45736	3.10211	3.08118	5e-05	0.00325273	yes
ENSDARG00000015575	cyp3c1	7.55591	4.06878	5.22806	18.0257	44.487	82.0308	ENSDARG00000015575	cyp3c1	3:40969241-40976582	EGFP	SATB2	OK	5.61759	48.1812	3.10045	2.84214	5e-05	0.00325273	yes
ENSDARG00000058244	il17ra1a	0.513077	1.21208	0.42982	4.50912	4.4099	9.55327	ENSDARG00000058244	il17ra1a	4:12317460-12323228	EGFP	SATB2	OK	0.718327	6.15743	3.09962	1.98201	0.0003	0.0130109	yes
ENSDARG00000044655	st14b	0.227711	0.167811	0.66488	7.14512	1.32686	0.606574	ENSDARG00000044655	st14b	21:25275692-25295087	EGFP	SATB2	OK	0.353467	3.02618	3.09785	2.23385	0.0013	0.0349533	yes
ENSDARG00000038121	si:ch211-13k12.2	4.73306	0.721729	1.82081	11.0057	22.9665	27.6697	ENSDARG00000038121	si:ch211-13k12.2	18:25563291-25646286	EGFP	SATB2	OK	2.4252	20.5473	3.08277	2.23228	0.00035	0.0147006	yes
ENSDARG00000075854	cx34.4	2.43107	0.669412	0.845221	9.39623	14.7282	9.16321	ENSDARG00000075854	cx34.4	17:24843400-24844543	EGFP	SATB2	OK	1.31524	11.0959	3.07663	2.51122	0.00175	0.0430633	yes
ENSDARG00000098237	fbn2b	4.32507	1.54914	11.7154	92.319	16.0469	37.0703	ENSDARG00000098237	fbn2b	22:4524366-4649238	EGFP	SATB2	OK	5.86319	48.4787	3.04759	1.59884	5e-05	0.00325273	yes
ENSDARG00000053003	slc35f1	0.457958	0.477961	0.480219	0.768093	5.31031	5.6111	ENSDARG00000053003	slc35f1	20:41998501-42203629	EGFP	SATB2	OK	0.472046	3.8965	3.04518	1.70757	0.0012	0.0334155	yes
ENSDARG00000098899	zmp:0000001082	3.37071	5.4447	6.92491	30.917	34.235	63.9658	ENSDARG00000098899	zmp:0000001082	1:59555935-59567685	EGFP	SATB2	OK	5.24677	43.0393	3.03615	3.72413	5e-05	0.00325273	yes
ENSDARG00000028507	itgb4	0.965632	1.85371	4.23347	47.6463	8.509	1.6796	ENSDARG00000028507	itgb4	8:13106759-13159587	EGFP	SATB2	OK	2.35094	19.2783	3.03567	1.71215	5e-05	0.00325273	yes
ENSDARG00000099775	CABZ01074307.1	1.00448	2.78533	0.23538	1.36274	0.810898	30.7404	ENSDARG00000099775	CABZ01074307.1	KN150487.1:31701-60475	EGFP	SATB2	OK	1.34173	10.9713	3.03157	2.34656	0.0006	0.021125	yes
ENSDARG00000005108	oclna	0.626939	0.135805	1.55973	12.0232	5.86793	1.0279	ENSDARG00000005108	oclna	10:2924774-2943474	EGFP	SATB2	OK	0.774158	6.30634	3.0261	2.38472	0.0013	0.0349533	yes
ENSDARG00000041609	adarb1a	0.397756	0.346367	0.580461	2.82691	6.41036	1.48853	ENSDARG00000041609	adarb1a	22:12641579-12693837	EGFP	SATB2	OK	0.441528	3.57527	3.01747	2.8147	0.00015	0.00775308	yes
ENSDARG00000030376	grin2bb	0.392338	0.0624324	0.068122	3.18765	0.465502	0.579904	ENSDARG00000030376	grin2bb	1:45372561-45553602	EGFP	SATB2	OK	0.174298	1.41102	3.01711	2.32134	0.00095	0.0289462	yes
ENSDARG00000100436	cnga2b	2.41956	0.97874	0.806688	14.6531	8.74673	10.479	ENSDARG00000100436	cnga2b	5:23035644-23043974	EGFP	SATB2	OK	1.40166	11.293	3.01021	2.91244	0.0001	0.00571692	yes
ENSDARG00000092883	si:dkey-193b15.5	0.692466	1.03981	1.20315	9.53679	8.36541	5.5337	ENSDARG00000092883	si:dkey-193b15.5	2:36907135-36914281	EGFP	SATB2	OK	0.978476	7.81197	2.99708	2.5876	0.00015	0.00775308	yes
ENSDARG00000051824	tmeff2a	0.599641	0.21455	2.1137	0.473269	13.7982	8.991	ENSDARG00000051824	tmeff2a	9:24249183-24413008	EGFP	SATB2	OK	0.975963	7.75417	2.99007	2.37335	0.0008	0.0257994	yes
ENSDARG00000088116	gstm.3	0.666343	0.508877	1.24137	14.0847	4.29566	0.747186	ENSDARG00000088116	gstm.3	8:25302171-25307014	EGFP	SATB2	OK	0.805529	6.37586	2.98461	2.00154	0.0019	0.0448531	yes
ENSDARG00000040277	fbxo32	2.55928	1.47117	2.50453	8.50306	3.54239	39.2	ENSDARG00000040277	fbxo32	16:25259312-25272633	EGFP	SATB2	OK	2.17833	17.0818	2.97117	2.50405	5e-05	0.00325273	yes
ENSDARG00000075980	tmem125b	0.810879	0.879076	0.540987	7.33227	5.92508	4.22905	ENSDARG00000075980	tmem125b	2:5933901-5942355	EGFP	SATB2	OK	0.743648	5.8288	2.97051	2.30085	0.0001	0.00571692	yes
ENSDARG00000091209	ucp3	1.17867	8.83778	0.972492	61.801	0.074094	24.1179	ENSDARG00000091209	ucp3	10:36650221-36662600	EGFP	SATB2	OK	3.66298	28.6643	2.96817	2.62055	0.0002	0.00939378	yes
ENSDARG00000055784	ptpn3	0.821422	1.39662	1.4114	16.7045	3.21617	8.46391	ENSDARG00000055784	ptpn3	16:26547151-26600624	EGFP	SATB2	OK	1.20981	9.46153	2.96729	3.04992	5e-05	0.00325273	yes
ENSDARG00000096867	clmn	3.79468	0.0266992	1.0215	1.04466	22.696	14.0289	ENSDARG00000096867	clmn	17:15983246-16034453	EGFP	SATB2	OK	1.61429	12.5899	2.96329	1.15311	0.00015	0.00775308	yes
ENSDARG00000043133	cldnf	0.196125	1.15453	0.879128	3.52353	2.70576	10.9956	ENSDARG00000043133	cldnf	15:2650786-2652640	EGFP	SATB2	OK	0.743261	5.74162	2.94952	2.23061	0.0016	0.0402471	yes
ENSDARG00000038288	cd151	7.90676	3.69886	3.46582	16.8508	53.342	45.8918	ENSDARG00000038288	cd151	25:3809732-3830272	EGFP	SATB2	OK	5.02381	38.6949	2.94529	3.12561	5e-05	0.00325273	yes
ENSDARG00000070331	muc5.1	0.522377	0.0547584	0.17066	0.10166	5.28208	0.324684	ENSDARG00000070331	muc5.1	25:8356706-8400166	EGFP	SATB2	OK	0.249265	1.90281	2.93238	2.27725	0.00065	0.0224319	yes
ENSDARG00000058365	hspb8	3.63494	0.0823852	1.14459	15.723	14.0966	7.08433	ENSDARG00000058365	hspb8	5:15819650-15840485	EGFP	SATB2	OK	1.62064	12.3013	2.92418	2.11097	0.0022	0.0487814	yes
ENSDARG00000039669	TSTA3 (1 of many)	0.422741	0.594911	0.771074	9.67328	3.40694	0.494757	ENSDARG00000039669	TSTA3 (1 of many)	20:52492191-52525680	EGFP	SATB2	OK	0.596242	4.52499	2.92395	2.6107	5e-05	0.00325273	yes
ENSDARG00000040534	epcam	0.104736	0.396853	3.59757	20.0794	10.1867	0.716982	ENSDARG00000040534	epcam	13:8840771-8843363	EGFP	SATB2	OK	1.36639	10.3277	2.91808	2.04624	0.0013	0.0349533	yes
ENSDARG00000116411	RF00017	52.3875	23.1818	17.7095	338.631	343.107	21.577	ENSDARG00000116411	RF00017	11:11415512-11415809	EGFP	SATB2	OK	31.0929	234.438	2.91455	2.76491	5e-05	0.00325273	yes
ENSDARG00000110849	RF00017	103.361	72.6094	94.8726	1327.57	652.102	59.3489	ENSDARG00000110849	RF00017	11:11447188-11447485	EGFP	SATB2	OK	90.281	679.672	2.91235	3.06011	5e-05	0.00325273	yes
ENSDARG00000098037	CU927934.3	1.70503	0.738951	3.69807	2.98	14.3222	28.8486	ENSDARG00000098037	CU927934.3	2:14007937-14009528	EGFP	SATB2	OK	2.04735	15.3836	2.90956	2.48776	5e-05	0.00325273	yes
ENSDARG00000100690	si:ch211-256e16.11	1.06107	6.71143	4.16073	24.8667	7.95645	56.7834	ENSDARG00000100690	si:ch211-256e16.11	3:58188902-58189429	EGFP	SATB2	OK	3.97774	29.8688	2.90862	2.30657	0.00215	0.0483835	yes
ENSDARG00000063309	tjp2a	0.165104	0.169886	0.475723	3.91189	1.43639	0.691524	ENSDARG00000063309	tjp2a	10:15815864-15879569	EGFP	SATB2	OK	0.270238	2.01327	2.89724	2.13157	0.0014	0.0366412	yes
ENSDARG00000000212	krt97	0.366756	0.589706	2.68875	9.22722	17.4779	0.424556	ENSDARG00000000212	krt97	22:11756039-11759106	EGFP	SATB2	OK	1.21507	9.04323	2.8958	2.33581	0.001	0.029749	yes
ENSDARG00000103351	FP102192.2	1.79546	0.745941	2.80491	8.3377	11.3624	19.6917	ENSDARG00000103351	FP102192.2	5:8284357-8334243	EGFP	SATB2	OK	1.7821	13.1306	2.88128	3.44775	5e-05	0.00325273	yes
ENSDARG00000056150	rbms2b	3.46907	4.44449	1.3211	10.3573	17.2616	40.0189	ENSDARG00000056150	rbms2b	23:25708786-25768765	EGFP	SATB2	OK	3.07822	22.5459	2.8727	3.01448	5e-05	0.00325273	yes
ENSDARG00000042866	cx35.4	1.45022	1.24068	2.45868	17.621	10.898	9.12745	ENSDARG00000042866	cx35.4	17:24848975-24853918	EGFP	SATB2	OK	1.71653	12.5488	2.86999	2.42849	0.00055	0.0199223	yes
ENSDARG00000056481	vat1	7.24978	6.74315	13.681	32.7325	91.2299	78.2574	ENSDARG00000056481	vat1	3:19914331-19971774	EGFP	SATB2	OK	9.22466	67.4066	2.86932	3.3234	5e-05	0.00325273	yes
ENSDARG00000087666	fibpb	1.43233	1.38895	1.52401	6.76174	7.04868	17.7893	ENSDARG00000087666	fibpb	21:25605367-25613249	EGFP	SATB2	OK	1.44843	10.5332	2.86239	2.56978	0.00055	0.0199223	yes
ENSDARG00000060415	arhgef28	0.882036	1.05722	0.615103	3.50823	4.82414	10.1223	ENSDARG00000060415	arhgef28	5:34827613-34964830	EGFP	SATB2	OK	0.851454	6.15155	2.85295	2.9532	5e-05	0.00325273	yes
ENSDARG00000043128	cldne	0.527236	0.354715	4.81543	33.4152	6.26471	1.45603	ENSDARG00000043128	cldne	15:2638883-2640966	EGFP	SATB2	OK	1.89913	13.712	2.85203	2.39415	0.00085	0.0269135	yes
ENSDARG00000103590	cyp2aa6	0.914155	3.22928	2.36434	5.76929	15.3743	25.7237	ENSDARG00000103590	cyp2aa6	23:42316064-42330488	EGFP	SATB2	OK	2.16926	15.6224	2.84835	2.67974	0.0001	0.00571692	yes
ENSDARG00000016357	fmo5	1.61819	1.07271	3.15569	7.62151	9.22773	25.1798	ENSDARG00000016357	fmo5	20:15093608-15104709	EGFP	SATB2	OK	1.94886	14.0097	2.84572	2.95074	5e-05	0.00325273	yes
ENSDARG00000096355	ighv1-4	11.5027	34.3838	32.8856	6.67818	123.028	436.066	ENSDARG00000096355	ighv1-4	3:33963246-34095221	EGFP	SATB2	OK	26.2574	188.591	2.84446	2.43393	0.00075	0.0247511	yes
ENSDARG00000070497	bicc1b	0.440777	0.568247	0.809787	6.4832	2.53183	4.00695	ENSDARG00000070497	bicc1b	12:7399402-7429824	EGFP	SATB2	OK	0.606271	4.34066	2.83988	2.33924	0.00115	0.0323817	yes
ENSDARG00000079011	col17a1b	0.132562	0.384024	3.12659	14.7977	10.2553	0.906396	ENSDARG00000079011	col17a1b	13:24750077-24779692	EGFP	SATB2	OK	1.21439	8.65312	2.83299	1.86448	0.0007	0.0235823	yes
ENSDARG00000061576	gldn	0.980763	1.26426	1.3834	20.2101	1.28308	4.33054	ENSDARG00000061576	gldn	18:39649659-39662370	EGFP	SATB2	OK	1.20948	8.60791	2.83128	2.41805	0.00015	0.00775308	yes
ENSDARG00000078953	epn3a	1.94924	4.52156	6.63914	54.4165	12.0004	25.7484	ENSDARG00000078953	epn3a	3:50155244-50269145	EGFP	SATB2	OK	4.36998	30.7218	2.81356	2.87191	5e-05	0.00325273	yes
ENSDARG00000063230	bmp7b	0.560116	6.32466	0.220365	21.1247	6.09553	22.7239	ENSDARG00000063230	bmp7b	23:6421413-6522099	EGFP	SATB2	OK	2.36838	16.6481	2.81338	2.52444	0.0011	0.0317639	yes
ENSDARG00000037618	ddit4	14.845	28.1725	21.2119	115.551	103.275	231.516	ENSDARG00000037618	ddit4	12:48340132-48342259	EGFP	SATB2	OK	21.4098	150.114	2.80971	3.20452	5e-05	0.00325273	yes
ENSDARG00000029296	nexmifb	0.343776	0.208744	0	0.759414	1.62258	1.46804	ENSDARG00000029296	nexmifb	14:11103717-11268375	EGFP	SATB2	OK	0.184173	1.28334	2.80077	2.41308	0.0019	0.0448531	yes
ENSDARG00000087352	dnah2	0.358182	0.0439197	0.0505122	0.216419	0.524492	2.40195	ENSDARG00000087352	dnah2	7:21321316-21626580	EGFP	SATB2	OK	0.150871	1.04762	2.79573	2.28131	0.00165	0.0411845	yes
ENSDARG00000098368	aplp1	0.576822	0.12437	0.130873	1.53971	3.35935	0.860197	ENSDARG00000098368	aplp1	15:37105985-37231035	EGFP	SATB2	OK	0.277355	1.91975	2.79111	2.31627	0.00145	0.0374305	yes
ENSDARG00000101613	si:dkey-238i5.2	0.557835	1.19362	1.38281	14.7373	3.39899	3.3976	ENSDARG00000101613	si:dkey-238i5.2	11:31285126-31320617	EGFP	SATB2	OK	1.04475	7.17797	2.78042	2.74867	5e-05	0.00325273	yes
ENSDARG00000104039	errfi1a	0.971405	0.649034	0.292076	3.29042	2.09019	7.51181	ENSDARG00000104039	errfi1a	11:40812589-40847615	EGFP	SATB2	OK	0.637505	4.29747	2.75298	2.17351	0.00185	0.0443197	yes
ENSDARG00000110804	PARD3 (1 of many)	1.82313	1.68753	0.571409	11.8012	5.92177	9.77456	ENSDARG00000110804	PARD3 (1 of many)	24:1845688-1985007	EGFP	SATB2	OK	1.36069	9.16585	2.75193	2.73197	0.00035	0.0147006	yes
ENSDARG00000062531	mapk8ip3	1.71547	2.17174	5.59006	15.5195	27.0746	20.9666	ENSDARG00000062531	mapk8ip3	3:15907296-15988728	EGFP	SATB2	OK	3.15909	21.1869	2.74559	3.11138	5e-05	0.00325273	yes
ENSDARG00000059815	oaz2b	2.14192	0.556774	2.01795	0.332818	13.9281	17.3184	ENSDARG00000059815	oaz2b	7:48266128-48297725	EGFP	SATB2	OK	1.57221	10.5264	2.74315	2.20736	0.001	0.029749	yes
ENSDARG00000031588	si:dkey-239b22.1	0.37606	1.91751	1.84905	20.6344	4.3485	2.70319	ENSDARG00000031588	si:dkey-239b22.1	12:38929662-38974869	EGFP	SATB2	OK	1.38087	9.22868	2.74054	2.21624	0.0001	0.00571692	yes
ENSDARG00000096712	si:dkey-193p11.2	3.24854	1.88841	6.85799	41.162	36.8955	1.69115	ENSDARG00000096712	si:dkey-193p11.2	12:25885909-25887864	EGFP	SATB2	OK	3.99832	26.5829	2.73303	2.44283	0.0001	0.00571692	yes
ENSDARG00000003403	tenm1	0.829085	1.63487	2.03657	7.78007	10.6866	11.39	ENSDARG00000003403	tenm1	5:21295746-21524251	EGFP	SATB2	OK	1.50018	9.95224	2.72989	3.24704	5e-05	0.00325273	yes
ENSDARG00000007671	ghrb	6.47023	1.67655	1.73609	8.04049	8.65589	48.8439	ENSDARG00000007671	ghrb	21:20742875-20765338	EGFP	SATB2	OK	3.29429	21.8468	2.72938	2.6828	5e-05	0.00325273	yes
ENSDARG00000117599	CABZ01068842.1	2.0343	0.215094	7.16124	53.3569	7.72202	1.10373	ENSDARG00000117599	CABZ01068842.1	18:1270386-1280748	EGFP	SATB2	OK	3.13688	20.7276	2.72415	2.38985	0.00225	0.0491677	yes
ENSDARG00000009544	cldnb	0.809819	0.40137	7.74385	46.9095	9.90749	2.33489	ENSDARG00000009544	cldnb	21:25765733-25766840	EGFP	SATB2	OK	2.98501	19.7173	2.72365	2.07759	0.00085	0.0269135	yes
ENSDARG00000004658	zgc:101810	0.253764	0.121037	1.99419	10.0483	4.10481	1.38793	ENSDARG00000004658	zgc:101810	7:7378919-7398350	EGFP	SATB2	OK	0.789663	5.18034	2.71374	2.09168	0.00095	0.0289462	yes
ENSDARG00000036036	mdka	2.03611	0.319833	3.94061	25.7692	12.3096	3.05442	ENSDARG00000036036	mdka	7:39166459-39178198	EGFP	SATB2	OK	2.09885	13.7111	2.70767	1.92047	0.00225	0.0491677	yes
ENSDARG00000013087	ndrg3a	18.5695	2.24821	8.04297	21.2302	44.4616	122.603	ENSDARG00000013087	ndrg3a	11:25064518-25155003	EGFP	SATB2	OK	9.62022	62.7651	2.70582	2.66754	5e-05	0.00325273	yes
ENSDARG00000096147	BX465862.3	1.70534	8.51064	3.0267	30.4197	21.3453	34.6148	ENSDARG00000096147	BX465862.3	4:11610717-11637382	EGFP	SATB2	OK	4.41423	28.7933	2.7055	2.52123	0.00055	0.0199223	yes
ENSDARG00000052039	caspb	0.479649	0.0644976	1.73534	5.11902	9.36379	0.344646	ENSDARG00000052039	caspb	1:58050904-58064738	EGFP	SATB2	OK	0.75983	4.94248	2.70149	2.06124	0.00135	0.0357458	yes
ENSDARG00000067976	ar	1.12949	0.999598	1.31461	4.29716	6.78862	11.2712	ENSDARG00000067976	ar	5:35561606-35679140	EGFP	SATB2	OK	1.1479	7.45234	2.69869	2.82154	5e-05	0.00325273	yes
ENSDARG00000024775	si:ch211-129c21.1	0.0500407	0.391075	0.818019	5.52906	1.63823	0.960733	ENSDARG00000024775	si:ch211-129c21.1	22:22316854-22340688	EGFP	SATB2	OK	0.419712	2.70934	2.69047	1.56627	0.00215	0.0483835	yes
ENSDARG00000023369	mxd	0.345811	1.81109	0.948771	2.30437	12.5462	5.16888	ENSDARG00000023369	mxd	25:19718503-19731255	EGFP	SATB2	OK	1.03522	6.67314	2.68842	2.28776	0.0007	0.0235823	yes
ENSDARG00000013343	kif26ba	0.680488	0.102854	0.528086	2.3254	0.62766	5.49489	ENSDARG00000013343	kif26ba	17:11507130-11718491	EGFP	SATB2	OK	0.437143	2.81598	2.68746	2.69006	0.0001	0.00571692	yes
ENSDARG00000069476	spint2	0.642622	0.416773	2.86249	18.7084	5.99632	0.530946	ENSDARG00000069476	spint2	15:20238427-20250516	EGFP	SATB2	OK	1.3073	8.41188	2.68584	2.04676	0.00165	0.0411845	yes
ENSDARG00000034210	si:dkey-240h12.4	0.88211	1.44734	1.88234	5.27646	7.40517	14.3314	ENSDARG00000034210	si:dkey-240h12.4	19:11167288-11208824	EGFP	SATB2	OK	1.40393	9.00434	2.68115	2.53581	0.00035	0.0147006	yes
ENSDARG00000058492	si:dkey-30c15.17	1.80827	2.47799	0.350199	0.726092	12.9633	15.8677	ENSDARG00000058492	si:dkey-30c15.17	18:7363241-7374783	EGFP	SATB2	OK	1.54549	9.85239	2.67241	2.27248	0.0001	0.00571692	yes
ENSDARG00000099547	nbeal1	1.32898	4.78881	7.27429	8.78428	29.7751	46.7417	ENSDARG00000099547	nbeal1	6:4255318-4365331	EGFP	SATB2	OK	4.46403	28.4337	2.67118	2.84726	5e-05	0.00325273	yes
ENSDARG00000012390	kcnk5b	5.82415	0.844154	7.22333	19.9627	22.9559	45.5482	ENSDARG00000012390	kcnk5b	20:9223513-9239037	EGFP	SATB2	OK	4.63054	29.4889	2.67092	3.11115	5e-05	0.00325273	yes
ENSDARG00000042977	nfil3	4.52602	4.58003	3.11584	9.71591	5.46484	62.4215	ENSDARG00000042977	nfil3	10:5414223-5419256	EGFP	SATB2	OK	4.07396	25.8674	2.66663	2.61837	0.0001	0.00571692	yes
ENSDARG00000100053	CABZ01044099.1	4.28554	2.4177	7.34917	12.4346	30.2758	46.2618	ENSDARG00000100053	CABZ01044099.1	24:41554612-41657005	EGFP	SATB2	OK	4.68413	29.6574	2.66254	2.41222	0.0005	0.0187099	yes
ENSDARG00000098121	FP101882.1	1.49903	2.05909	2.58926	9.17	3.20014	26.5408	ENSDARG00000098121	FP101882.1	6:28222988-28224964	EGFP	SATB2	OK	2.04913	12.9703	2.66213	2.49509	0.00045	0.0174744	yes
ENSDARG00000075139	hdac5	3.9594	7.34942	15.1376	25.1896	24.3162	117.595	ENSDARG00000075139	hdac5	3:22905340-22976456	EGFP	SATB2	OK	8.81547	55.7002	2.65957	2.393	0.0006	0.021125	yes
ENSDARG00000025089	loxl4	1.5911	2.28522	1.3038	18.6412	7.32537	6.65078	ENSDARG00000025089	loxl4	13:40182486-40238813	EGFP	SATB2	OK	1.72671	10.8725	2.65458	2.6478	5e-05	0.00325273	yes
ENSDARG00000017494	tgfbr1a	4.56877	2.68328	5.16597	9.23252	30.1021	38.2926	ENSDARG00000017494	tgfbr1a	2:23856044-23931536	EGFP	SATB2	OK	4.13934	25.8757	2.64413	2.81084	5e-05	0.00325273	yes
ENSDARG00000100446	si:ch211-286o17.1	13.5537	0.540363	1.08908	21.4524	25.8395	46.8121	ENSDARG00000100446	si:ch211-286o17.1	6:47424265-47462413	EGFP	SATB2	OK	5.06103	31.368	2.63179	1.02785	0.0003	0.0130109	yes
ENSDARG00000006526	fn1b	5.50728	2.35826	7.23579	76.4738	9.38678	7.09624	ENSDARG00000006526	fn1b	1:5437389-5543065	EGFP	SATB2	OK	5.03378	30.9856	2.62188	1.16271	0.0014	0.0366412	yes
ENSDARG00000079095	rin1a	0.667752	2.59153	0.817083	11.3662	5.54359	8.1393	ENSDARG00000079095	rin1a	21:27356767-27362938	EGFP	SATB2	OK	1.35879	8.34971	2.61941	2.59465	5e-05	0.00325273	yes
ENSDARG00000077139	col6a3	3.48307	12.543	14.325	34.8259	85.672	65.6081	ENSDARG00000077139	col6a3	9:23914316-23994225	EGFP	SATB2	OK	10.117	62.0353	2.61631	1.33749	5e-05	0.00325273	yes
ENSDARG00000076799	rnd3a	2.57835	2.83644	15.5737	36.8326	40.1143	51.5519	ENSDARG00000076799	rnd3a	22:12431607-12449572	EGFP	SATB2	OK	6.99616	42.8329	2.61409	3.11936	5e-05	0.00325273	yes
ENSDARG00000103732	plp1a	1.79899	1.56904	0.272272	2.77156	4.17328	15.211	ENSDARG00000103732	plp1a	14:14577245-14596699	EGFP	SATB2	OK	1.21343	7.38528	2.60556	2.27938	0.0001	0.00571692	yes
ENSDARG00000073684	quo	1.09433	1.63489	0.574037	7.54404	5.29409	7.1239	ENSDARG00000073684	quo	6:2030702-2092659	EGFP	SATB2	OK	1.10109	6.65401	2.5953	2.99233	5e-05	0.00325273	yes
ENSDARG00000077004	aldh1l1	1.35338	0.343198	2.36174	1.22959	10.3298	12.9072	ENSDARG00000077004	aldh1l1	6:22068588-22104394	EGFP	SATB2	OK	1.35277	8.15555	2.59186	2.86835	5e-05	0.00325273	yes
ENSDARG00000062974	itga2.2	0.208173	0.0299951	2.01317	9.49595	3.66842	0.364037	ENSDARG00000062974	itga2.2	10:8885768-8940896	EGFP	SATB2	OK	0.750447	4.50947	2.58714	2.12091	0.00085	0.0269135	yes
ENSDARG00000017772	mdh1aa	216.612	91.2958	434.71	150.517	1332.67	2974.87	ENSDARG00000017772	mdh1aa	1:50968907-50990889	EGFP	SATB2	OK	247.539	1486.02	2.58573	1.49376	0.0022	0.0487814	yes
ENSDARG00000036830	krt91	2.9127	3.24384	61.3776	262.626	105.055	32.8967	ENSDARG00000036830	krt91	19:5378562-5380770	EGFP	SATB2	OK	22.5114	133.526	2.56839	1.74263	0.0007	0.0235823	yes
ENSDARG00000002787	tle3a	1.82807	2.63524	2.40278	8.33833	12.1343	20.216	ENSDARG00000002787	tle3a	18:20225960-20257511	EGFP	SATB2	OK	2.2887	13.5629	2.56706	2.94101	5e-05	0.00325273	yes
ENSDARG00000052332	ftr98	0.634634	1.57455	1.01003	10.0202	2.93277	6.0663	ENSDARG00000052332	ftr98	8:39827197-39838660	EGFP	SATB2	OK	1.07307	6.33975	2.56268	2.13246	0.00035	0.0147006	yes
ENSDARG00000090982	slc44a1b	11.7228	10.3182	13.158	36.557	103.502	67.51	ENSDARG00000090982	slc44a1b	14:6331498-6402769	EGFP	SATB2	OK	11.733	69.1897	2.55999	2.18031	5e-05	0.00325273	yes
ENSDARG00000044975	krt94	3.05851	1.22414	1.5795	6.87374	6.09012	21.4206	ENSDARG00000044975	krt94	11:11468565-11471857	EGFP	SATB2	OK	1.95405	11.4615	2.55225	2.66456	5e-05	0.00325273	yes
ENSDARG00000034541	tgfbr2b	1.76947	4.25021	3.34218	38.0287	10.0629	6.65808	ENSDARG00000034541	tgfbr2b	16:39485607-39605661	EGFP	SATB2	OK	3.12062	18.2499	2.54798	2.52277	5e-05	0.00325273	yes
ENSDARG00000062515	tecpr1a	0.870138	0.727792	1.15911	3.59406	3.6071	8.84279	ENSDARG00000062515	tecpr1a	12:17794283-17810543	EGFP	SATB2	OK	0.919014	5.34798	2.54084	2.15021	0.001	0.029749	yes
ENSDARG00000052846	fsta	0.711041	1.84393	1.24197	1.5262	9.67648	10.7731	ENSDARG00000052846	fsta	5:40504909-40510399	EGFP	SATB2	OK	1.26565	7.32526	2.53301	2.29156	0.0004	0.0162871	yes
ENSDARG00000075718	rpz5	5.67986	12.6116	9.60923	70.6934	47.3582	43.3132	ENSDARG00000075718	rpz5	16:46492755-46496293	EGFP	SATB2	OK	9.30023	53.7883	2.53195	2.77934	5e-05	0.00325273	yes
ENSDARG00000005476	nav3	0.836728	1.51969	3.35541	18.815	10.1888	4.02593	ENSDARG00000005476	nav3	4:20812899-20987564	EGFP	SATB2	OK	1.90394	11.0099	2.53174	1.07677	0.0009	0.0279878	yes
ENSDARG00000070494	pdgfra	0.748762	0.116602	0.491976	3.11901	1.36289	3.35297	ENSDARG00000070494	pdgfra	20:22435179-22476255	EGFP	SATB2	OK	0.452447	2.61162	2.52913	2.15994	0.00205	0.0471167	yes
ENSDARG00000005104	limk2	0.865459	0.73169	2.28805	10.7707	8.69167	2.9595	ENSDARG00000005104	limk2	5:20823408-20863374	EGFP	SATB2	OK	1.29507	7.47397	2.52885	1.36704	0.001	0.029749	yes
ENSDARG00000086752	LO018205.1	0.277686	0.299444	0.428986	1.63443	0.957853	3.21377	ENSDARG00000086752	LO018205.1	4:74023395-74028161	EGFP	SATB2	OK	0.335372	1.93535	2.52876	2.10828	0.0015	0.0385892	yes
ENSDARG00000087193	prrg2	0.754596	1.3565	0.830917	5.56885	4.4259	6.93891	ENSDARG00000087193	prrg2	3:32416947-32424303	EGFP	SATB2	OK	0.98067	5.64456	2.52502	1.84608	0.00105	0.0306722	yes
ENSDARG00000032010	slc15a2	1.40609	0.89501	0.647057	1.92201	11.289	3.73999	ENSDARG00000032010	slc15a2	9:37320221-37339656	EGFP	SATB2	OK	0.98272	5.65032	2.52348	1.67904	0.0007	0.0235823	yes
ENSDARG00000059826	crtac1a	1.54576	3.08684	1.59642	1.53924	4.23373	29.9683	ENSDARG00000059826	crtac1a	1:54934521-54947592	EGFP	SATB2	OK	2.07634	11.9138	2.52051	1.42876	0.00205	0.0471167	yes
ENSDARG00000076673	wu:fi04e12	0.472186	2.41334	1.14225	11.5208	5.53694	5.9068	ENSDARG00000076673	wu:fi04e12	20:52851792-52882881	EGFP	SATB2	OK	1.34259	7.65486	2.51135	2.76256	5e-05	0.00325273	yes
ENSDARG00000096172	znf1113	1.01133	1.27945	0.570854	4.56696	5.79895	5.93149	ENSDARG00000096172	znf1113	4:48802364-48826449	EGFP	SATB2	OK	0.953878	5.43247	2.50973	2.22805	0.001	0.029749	yes
ENSDARG00000057452	ston2	0.603923	0.238896	2.56614	8.36314	5.00472	6.03762	ENSDARG00000057452	ston2	17:16755286-16808413	EGFP	SATB2	OK	1.13632	6.46849	2.50906	2.58905	0.00115	0.0323817	yes
ENSDARG00000019195	vps9d1	10.2659	6.9112	10.0983	8.79836	47.9645	98.1601	ENSDARG00000019195	vps9d1	18:14633973-14668398	EGFP	SATB2	OK	9.0918	51.641	2.50588	2.05351	5e-05	0.00325273	yes
ENSDARG00000105223	pmp22a	13.9979	32.4183	7.77232	91.3321	55.096	160.649	ENSDARG00000105223	pmp22a	3:50861175-50865079	EGFP	SATB2	OK	18.0629	102.359	2.50254	2.48611	0.0002	0.00939378	yes
ENSDARG00000062350	synm	1.61887	0.322243	1.44885	3.29231	3.52722	12.3489	ENSDARG00000062350	synm	18:20859660-20869175	EGFP	SATB2	OK	1.12999	6.38948	2.49939	2.57587	5e-05	0.00325273	yes
ENSDARG00000037154	hivep3b	1.19901	1.69997	0.707888	4.7157	3.0644	12.3329	ENSDARG00000037154	hivep3b	16:34321393-34425561	EGFP	SATB2	OK	1.20229	6.70434	2.47931	2.35539	0.0001	0.00571692	yes
ENSDARG00000027599	fam221a	2.18515	3.27359	1.68055	3.16291	6.56448	29.9366	ENSDARG00000027599	fam221a	19:20158656-20163233	EGFP	SATB2	OK	2.37976	13.2213	2.47398	1.97087	0.00185	0.0443197	yes
ENSDARG00000094901	abcc6b.2	0.280431	0.195686	0.229957	1.03755	1.32227	1.5613	ENSDARG00000094901	abcc6b.2	3:36807641-36824190	EGFP	SATB2	OK	0.235358	1.30704	2.47338	2.14641	0.0009	0.0279878	yes
ENSDARG00000101514	ftr64	0.517568	3.53315	0.853215	8.04613	4.7588	14.2671	ENSDARG00000101514	ftr64	4:71973210-71983381	EGFP	SATB2	OK	1.63465	9.02403	2.46479	2.23907	0.00015	0.00775308	yes
ENSDARG00000036993	erbb3b	0.543817	0.142803	0.388984	3.82742	1.26363	0.837724	ENSDARG00000036993	erbb3b	23:25232410-25287666	EGFP	SATB2	OK	0.358535	1.97626	2.46259	2.1841	0.00095	0.0289462	yes
ENSDARG00000117211	CR936462.1	0.344385	0.495045	0.435741	2.88061	2.67431	1.47264	ENSDARG00000117211	CR936462.1	5:43822112-43847779	EGFP	SATB2	OK	0.425057	2.34252	2.46233	2.50085	5e-05	0.00325273	yes
ENSDARG00000117754	CU207269.3	3.40608	0.834741	3.10757	18.0477	14.3309	7.97086	ENSDARG00000117754	CU207269.3	21:45462358-45470191	EGFP	SATB2	OK	2.44946	13.4498	2.45705	2.20688	0.0008	0.0257994	yes
ENSDARG00000076005	piezo2a.2	5.19556	2.45645	1.88147	24.372	20.6894	7.14655	ENSDARG00000076005	piezo2a.2	24:854876-945921	EGFP	SATB2	OK	3.17783	17.4027	2.4532	2.31194	5e-05	0.00325273	yes
ENSDARG00000031075	cadm1a	7.02693	0.304667	2.13423	2.1992	20.8325	28.8038	ENSDARG00000031075	cadm1a	21:23953180-24412427	EGFP	SATB2	OK	3.15528	17.2785	2.45314	2.16154	0.00125	0.0343431	yes
ENSDARG00000092352	jac4	0.56347	0.172521	4.45354	17.9735	10.2499	0.104381	ENSDARG00000092352	jac4	7:8456998-8458462	EGFP	SATB2	OK	1.72984	9.44259	2.44854	1.9932	0.00185	0.0443197	yes
ENSDARG00000111170	CABZ01068122.1	0.378235	0.632904	0.702673	4.33357	1.34535	3.65756	ENSDARG00000111170	CABZ01068122.1	KN149984.1:32188-56075	EGFP	SATB2	OK	0.571271	3.11216	2.44567	2.13315	0.0011	0.0317639	yes
ENSDARG00000059558	tecta	1.46385	0.274025	0.532075	3.62409	4.20587	4.51788	ENSDARG00000059558	tecta	5:63177354-63233216	EGFP	SATB2	OK	0.756649	4.11594	2.44353	2.41303	0.0002	0.00939378	yes
ENSDARG00000104770	CABZ01072815.1	0.489632	0.608785	0.279854	1.69277	2.59415	3.11925	ENSDARG00000104770	CABZ01072815.1	KN150572.1:9108-28851	EGFP	SATB2	OK	0.459424	2.46872	2.42587	2.24034	0.0002	0.00939378	yes
ENSDARG00000114837	RF00017	85.3363	16.9878	38.8182	390.082	331.382	36.0512	ENSDARG00000114837	RF00017	11:12171294-12171591	EGFP	SATB2	OK	47.0474	252.505	2.42413	2.23607	0.00065	0.0224319	yes
ENSDARG00000006491	agpat9l	0.320975	0.479546	0.713472	5.07875	1.9923	1.05251	ENSDARG00000006491	agpat9l	5:8919697-8957068	EGFP	SATB2	OK	0.504664	2.70785	2.42375	1.89677	0.002	0.0465823	yes
ENSDARG00000062058	slc12a7b	9.71569	4.05419	13.7415	27.1168	54.0148	64.9685	ENSDARG00000062058	slc12a7b	24:39778647-39885785	EGFP	SATB2	OK	9.17047	48.7	2.40886	2.40294	5e-05	0.00325273	yes
ENSDARG00000110040	CABZ01092781.1	0.736397	0.237994	0.420826	0.713471	3.488	3.19355	ENSDARG00000110040	CABZ01092781.1	20:1996201-2035120	EGFP	SATB2	OK	0.465072	2.46501	2.40606	2.02103	0.0009	0.0279878	yes
ENSDARG00000070487	zgc:110783	1.53768	1.3407	2.44893	4.18191	3.7071	20.2978	ENSDARG00000070487	zgc:110783	17:45472607-45525936	EGFP	SATB2	OK	1.77577	9.39562	2.40354	2.13224	0.0005	0.0187099	yes
ENSDARG00000044525	pparda	0.766127	1.93387	1.54551	5.39287	6.1177	10.7601	ENSDARG00000044525	pparda	22:997837-1019152	EGFP	SATB2	OK	1.41517	7.42355	2.39114	2.29157	0.00105	0.0306722	yes
ENSDARG00000088022	mhc1zfa	0.333219	1.83029	3.21244	10.3132	4.03677	13.5152	ENSDARG00000088022	mhc1zfa	3:325756-336299	EGFP	SATB2	OK	1.79198	9.28839	2.37387	2.32004	0.0003	0.0130109	yes
ENSDARG00000001879	nav2b	1.79615	0.93564	4.08566	33.1546	1.80526	0.319135	ENSDARG00000001879	nav2b	25:14510772-14637660	EGFP	SATB2	OK	2.27248	11.7597	2.37151	1.85132	0.0004	0.0162871	yes
ENSDARG00000061093	phldb1a	0.876165	6.80159	2.18899	16.2044	17.6723	17.0682	ENSDARG00000061093	phldb1a	5:30427197-30491172	EGFP	SATB2	OK	3.28892	16.9817	2.36829	2.69466	0.00025	0.0112297	yes
ENSDARG00000017624	krt4	18.036	14.3849	14.9417	153.34	52.8127	36.1005	ENSDARG00000017624	krt4	6:39308497-39313027	EGFP	SATB2	OK	15.7875	80.751	2.3547	2.56702	5e-05	0.00325273	yes
ENSDARG00000044356	tp63	1.29729	0.922123	1.56858	11.707	4.01972	3.55109	ENSDARG00000044356	tp63	6:28795779-28914225	EGFP	SATB2	OK	1.26267	6.42593	2.34743	2.27499	5e-05	0.00325273	yes
ENSDARG00000059567	si:ch73-281f12.4	1.18719	2.73332	2.21564	9.56942	4.7505	16.4105	ENSDARG00000059567	si:ch73-281f12.4	3:58714740-58798815	EGFP	SATB2	OK	2.04539	10.2435	2.32426	1.94433	0.0018	0.0435831	yes
ENSDARG00000098046	FP017161.1	4.27203	2.65682	2.7262	5.42891	35.3513	7.55516	ENSDARG00000098046	FP017161.1	20:84691-90255	EGFP	SATB2	OK	3.21835	16.1118	2.32373	2.2397	0.0002	0.00939378	yes
ENSDARG00000040815	tsku	1.09851	0.938058	1.26928	8.81856	4.35082	3.32745	ENSDARG00000040815	tsku	15:29343279-29354020	EGFP	SATB2	OK	1.10195	5.49894	2.31909	2.05799	0.00115	0.0323817	yes
ENSDARG00000074258	gramd1bb	7.91576	12.4085	26.9016	21.9113	58.8398	154.205	ENSDARG00000074258	gramd1bb	18:46840796-46957840	EGFP	SATB2	OK	15.7419	78.3185	2.31474	2.40962	0.00015	0.00775308	yes
ENSDARG00000117324	LO018196.1	1.37357	1.03674	1.89211	5.44677	6.77098	9.17333	ENSDARG00000117324	LO018196.1	22:37275953-37330117	EGFP	SATB2	OK	1.43414	7.13036	2.31379	2.27839	0.00155	0.0394718	yes
ENSDARG00000020761	arrdc2	25.6179	17.7818	18.1009	47.8628	35.8519	221.884	ENSDARG00000020761	arrdc2	11:13524503-13533782	EGFP	SATB2	OK	20.5002	101.866	2.31297	2.36694	0.0001	0.00571692	yes
ENSDARG00000078135	mrc2	0.768021	0.292608	0.96033	5.01066	2.12878	2.87702	ENSDARG00000078135	mrc2	3:19732172-19814819	EGFP	SATB2	OK	0.673653	3.33882	2.30926	2.11683	0.00115	0.0323817	yes
ENSDARG00000068194	klf9	7.65415	19.06	24.5304	45.3709	29.9638	178.395	ENSDARG00000068194	klf9	5:26075229-26078165	EGFP	SATB2	OK	17.0815	84.5767	2.30783	2.49073	5e-05	0.00325273	yes
ENSDARG00000103251	sh3pxd2b	4.4937	5.95402	5.64825	38.402	21.2928	19.7452	ENSDARG00000103251	sh3pxd2b	21:42717423-42780082	EGFP	SATB2	OK	5.36533	26.48	2.30316	2.16188	5e-05	0.00325273	yes
ENSDARG00000031678	col5a2a	2.45369	3.4072	6.83286	47.2455	13.7217	1.67139	ENSDARG00000031678	col5a2a	9:42653187-42696408	EGFP	SATB2	OK	4.23125	20.8795	2.30293	2.12694	0.0001	0.00571692	yes
ENSDARG00000086418	si:ch211-236p5.3	1.97191	0.984023	1.41931	8.31962	8.63962	4.59299	ENSDARG00000086418	si:ch211-236p5.3	17:8291560-8305792	EGFP	SATB2	OK	1.45841	7.18408	2.3004	2.68766	5e-05	0.00325273	yes
ENSDARG00000052129	boka	1.20262	1.92231	2.19512	8.85925	9.5412	7.68191	ENSDARG00000052129	boka	6:27062511-27089014	EGFP	SATB2	OK	1.77335	8.69412	2.29356	2.39444	0.0002	0.00939378	yes
ENSDARG00000094809	ms4a17a.11	4.92777	4.00108	13.0178	11.9529	29.6027	65.5318	ENSDARG00000094809	ms4a17a.11	4:76575584-76588333	EGFP	SATB2	OK	7.31556	35.6958	2.28671	2.24826	0.0016	0.0402471	yes
ENSDARG00000025920	tiam1b	0.724247	6.28547	2.43461	18.5979	12.8446	14.2861	ENSDARG00000025920	tiam1b	15:42397124-42551156	EGFP	SATB2	OK	3.14811	15.2429	2.27558	2.72263	5e-05	0.00325273	yes
ENSDARG00000077073	tanc1a	0.538954	0.202316	0.278672	1.01418	1.40788	2.50714	ENSDARG00000077073	tanc1a	6:12036950-12172424	EGFP	SATB2	OK	0.339981	1.64306	2.27286	2.02956	0.00195	0.0457472	yes
ENSDARG00000020544	rem1	0.848197	1.12873	1.47239	11.0533	2.18442	3.43013	ENSDARG00000020544	rem1	11:24313930-24332052	EGFP	SATB2	OK	1.14977	5.55595	2.27269	1.87674	0.0018	0.0435831	yes
ENSDARG00000019564	asap2b	1.16952	2.00724	1.23836	13.4488	5.88017	1.88764	ENSDARG00000019564	asap2b	20:29634652-29675458	EGFP	SATB2	OK	1.47171	7.0722	2.26467	2.29042	0.00025	0.0112297	yes
ENSDARG00000100231	ccdc135	0.537209	0.512553	0.721682	3.97864	1.26531	3.25633	ENSDARG00000100231	ccdc135	25:13731541-13744806	EGFP	SATB2	OK	0.590481	2.83343	2.26258	2.07654	0.00155	0.0394718	yes
ENSDARG00000090352	CR855311.1	10.8675	13.5838	4.70892	107.886	15.3895	16.6247	ENSDARG00000090352	CR855311.1	16:31623974-31628687	EGFP	SATB2	OK	9.7201	46.6334	2.26232	1.99894	0.0018	0.0435831	yes
ENSDARG00000076104	sema4bb	3.45426	0.233303	0.644982	2.63225	6.42209	11.5633	ENSDARG00000076104	sema4bb	7:30240790-30267169	EGFP	SATB2	OK	1.44418	6.87254	2.25059	1.65668	0.00045	0.0174744	yes
ENSDARG00000027529	hmox1a	2.94928	2.73123	2.78104	23.3858	7.95722	8.78661	ENSDARG00000027529	hmox1a	3:26011481-26017831	EGFP	SATB2	OK	2.82052	13.3766	2.24568	2.30533	0.00025	0.0112297	yes
ENSDARG00000117636	FP236157.7	0.332145	1.46312	6.17996	24.9657	6.15132	6.70494	ENSDARG00000117636	FP236157.7	1:59451691-59492590	EGFP	SATB2	OK	2.65841	12.6073	2.24563	2.15279	0.0008	0.0257994	yes
ENSDARG00000057173	ifit8	0.412543	6.05756	7.64781	15.0036	21.0997	30.8016	ENSDARG00000057173	ifit8	13:17694844-17697158	EGFP	SATB2	OK	4.70597	22.3016	2.24458	2.40539	5e-05	0.00325273	yes
ENSDARG00000029075	pfkfb4b	2.87524	6.65066	13.7193	24.6894	28.8901	56.4579	ENSDARG00000029075	pfkfb4b	6:39993604-40029423	EGFP	SATB2	OK	7.7484	36.6791	2.24299	1.96832	5e-05	0.00325273	yes
ENSDARG00000037116	cxcl12a	1.19689	0.412738	2.78241	15.6456	2.16284	2.91092	ENSDARG00000037116	cxcl12a	13:30804366-30819715	EGFP	SATB2	OK	1.46401	6.90644	2.23801	2.12559	0.00175	0.0430633	yes
ENSDARG00000020134	sipa1l1	0.99016	0.774035	0.335071	0.838362	4.13237	4.92471	ENSDARG00000020134	sipa1l1	20:28650024-28768114	EGFP	SATB2	OK	0.699755	3.29848	2.23688	2.45081	0.00055	0.0199223	yes
ENSDARG00000087575	zmp:0000000912	1.1538	11.3646	10.4891	56.2722	18.3572	33.4595	ENSDARG00000087575	zmp:0000000912	3:24655642-24660328	EGFP	SATB2	OK	7.66918	36.0296	2.23204	2.4767	0.0001	0.00571692	yes
ENSDARG00000035273	tmtc2b	1.46027	0.831673	0.624396	5.36109	4.82375	3.48079	ENSDARG00000035273	tmtc2b	18:11858396-11909472	EGFP	SATB2	OK	0.972113	4.55521	2.22832	2.04007	0.002	0.0465823	yes
ENSDARG00000105485	si:cabz01090193.1	23.643	23.9345	16.8757	158.557	64.2637	78.7769	ENSDARG00000105485	si:cabz01090193.1	7:1442058-1449130	EGFP	SATB2	OK	21.4844	100.533	2.2263	2.55159	5e-05	0.00325273	yes
ENSDARG00000075977	prr5a	3.97751	6.5463	1.89604	6.11383	14.8611	36.9481	ENSDARG00000075977	prr5a	25:21075226-21092222	EGFP	SATB2	OK	4.13995	19.3077	2.22149	2.21126	0.00075	0.0247511	yes
ENSDARG00000038278	ptgir	0.763259	0.721478	2.60805	3.49591	7.44031	8.08066	ENSDARG00000038278	ptgir	15:9117329-9184449	EGFP	SATB2	OK	1.36426	6.33896	2.21613	1.96123	0.0006	0.021125	yes
ENSDARG00000074481	ulk1b	9.9039	5.5129	9.38873	19.9611	44.3916	50.8379	ENSDARG00000074481	ulk1b	21:14839588-14878220	EGFP	SATB2	OK	8.26851	38.3968	2.21529	1.82901	5e-05	0.00325273	yes
ENSDARG00000003808	aqp3a	15.0587	3.3197	21.0223	108.426	42.7709	31.3259	ENSDARG00000003808	aqp3a	5:43006421-43011814	EGFP	SATB2	OK	13.1335	60.841	2.21179	2.63338	5e-05	0.00325273	yes
ENSDARG00000052097	trim35-31	0.177493	4.76939	2.5269	8.66385	10.3415	15.4957	ENSDARG00000052097	trim35-31	3:5538484-5555500	EGFP	SATB2	OK	2.49126	11.5004	2.20673	2.14288	0.00105	0.0306722	yes
ENSDARG00000029795	fam213b	5.40668	16.1305	2.27608	15.367	40.3638	54.0687	ENSDARG00000029795	fam213b	11:40617895-40647237	EGFP	SATB2	OK	7.93774	36.5998	2.20504	2.04428	0.0008	0.0257994	yes
ENSDARG00000109164	CABZ01045617.1	19.3497	83.1173	43.8447	269.149	262.418	142.021	ENSDARG00000109164	CABZ01045617.1	KN150411.1:7220-10795	EGFP	SATB2	OK	48.7706	224.529	2.20282	2.27374	0.0006	0.021125	yes
ENSDARG00000112644	CU459056.1	1.43913	0.491493	0.611019	6.36863	2.7279	2.56389	ENSDARG00000112644	CU459056.1	12:35809502-35830625	EGFP	SATB2	OK	0.847215	3.8868	2.19778	2.1737	0.0018	0.0435831	yes
ENSDARG00000075015	soul5	1.42217	5.28203	2.19434	1.03175	14.9046	24.82	ENSDARG00000075015	soul5	3:53476154-53486169	EGFP	SATB2	OK	2.96618	13.5854	2.19538	1.95362	0.0008	0.0257994	yes
ENSDARG00000071685	slco5a1a	5.78107	7.60334	4.04879	19.3832	15.9426	44.2784	ENSDARG00000071685	slco5a1a	24:19591892-19697446	EGFP	SATB2	OK	5.81107	26.5347	2.19101	1.91416	0.0014	0.0366412	yes
ENSDARG00000062302	znf652	3.5427	5.57544	7.3734	23.2036	24.507	27.385	ENSDARG00000062302	znf652	3:15755722-15795396	EGFP	SATB2	OK	5.49718	25.0319	2.187	2.48377	5e-05	0.00325273	yes
ENSDARG00000019392	stat5a	5.94819	12.5147	23.0874	54.6464	43.4392	91.0635	ENSDARG00000019392	stat5a	3:17251541-17331919	EGFP	SATB2	OK	13.8501	63.0497	2.18659	2.343	5e-05	0.00325273	yes
ENSDARG00000031240	kidins220a	1.87292	0.316844	2.28724	5.33049	6.8846	8.12756	ENSDARG00000031240	kidins220a	17:34809642-34963575	EGFP	SATB2	OK	1.49234	6.78088	2.1839	2.12131	0.00015	0.00775308	yes
ENSDARG00000046053	slc27a6	3.9379	8.73157	8.03787	36.8791	21.205	35.8771	ENSDARG00000046053	slc27a6	10:16501698-16540603	EGFP	SATB2	OK	6.90244	31.3204	2.18192	2.60638	5e-05	0.00325273	yes
ENSDARG00000037429	tll1	0.588202	0.447572	0.332952	1.04293	2.75546	2.40074	ENSDARG00000037429	tll1	1:20733101-20826023	EGFP	SATB2	OK	0.456242	2.06638	2.17923	2.04249	0.00225	0.0491677	yes
ENSDARG00000004196	tnfsf10l	2.26633	0.468873	1.3205	6.23229	2.76653	9.31782	ENSDARG00000004196	tnfsf10l	7:22911609-22956889	EGFP	SATB2	OK	1.3519	6.10555	2.17513	1.56742	0.00055	0.0199223	yes
ENSDARG00000004952	rsad2	2.85837	3.49533	4.01315	29.3637	13.0312	4.35407	ENSDARG00000004952	rsad2	17:35357450-35361322	EGFP	SATB2	OK	3.45562	15.583	2.17295	2.12582	0.0005	0.0187099	yes
ENSDARG00000032188	lrrc8aa	6.25895	25.1813	7.90062	74.8558	33.8543	67.723	ENSDARG00000032188	lrrc8aa	21:4256290-4304945	EGFP	SATB2	OK	13.1136	58.811	2.16502	2.61006	5e-05	0.00325273	yes
ENSDARG00000089871	jcada	0.630847	0.38752	0.305573	2.20351	0.683184	3.04016	ENSDARG00000089871	jcada	12:23762965-23796707	EGFP	SATB2	OK	0.441313	1.97562	2.16243	2.20429	0.0002	0.00939378	yes
ENSDARG00000060127	adamts3	0.675725	0.34315	0.577194	4.76823	1.40527	0.950317	ENSDARG00000060127	adamts3	5:45322733-45532848	EGFP	SATB2	OK	0.532023	2.37461	2.15813	1.89471	0.0021	0.047685	yes
ENSDARG00000090833	igfbp6b	3.95329	3.63854	3.171	37.9898	4.22449	5.66894	ENSDARG00000090833	igfbp6b	23:36601983-36605837	EGFP	SATB2	OK	3.58761	15.9611	2.15346	1.95474	0.00135	0.0357458	yes
ENSDARG00000090338	fam20cb	1.77959	4.89479	2.29609	19.3405	10.1388	10.3926	ENSDARG00000090338	fam20cb	12:18234556-18343653	EGFP	SATB2	OK	2.99016	13.2907	2.15212	2.35456	0.0003	0.0130109	yes
ENSDARG00000105648	si:cabz01102082.1	14.0218	13.1728	13.093	86.2592	41.9639	49.9599	ENSDARG00000105648	si:cabz01102082.1	7:1521833-1527551	EGFP	SATB2	OK	13.4292	59.3943	2.14496	2.57375	5e-05	0.00325273	yes
ENSDARG00000006747	tmem178b	1.90995	1.55268	1.3535	2.76092	1.87162	16.6361	ENSDARG00000006747	tmem178b	4:12111153-12239160	EGFP	SATB2	OK	1.60538	7.08953	2.14278	2.05894	0.00065	0.0224319	yes
ENSDARG00000101894	stk10	1.85209	3.46767	2.58805	11.7033	7.34156	15.5284	ENSDARG00000101894	stk10	21:42785515-42831033	EGFP	SATB2	OK	2.63594	11.5244	2.12831	2.48624	5e-05	0.00325273	yes
ENSDARG00000022807	pitpnc1b	2.54291	1.01156	0.991041	15.3853	1.97385	2.50289	ENSDARG00000022807	pitpnc1b	16:13424533-13453818	EGFP	SATB2	OK	1.51517	6.62067	2.1275	1.61435	0.0018	0.0435831	yes
ENSDARG00000006031	abat	33.7062	27.285	43.3262	90.312	67.8494	296.394	ENSDARG00000006031	abat	3:27832499-27880229	EGFP	SATB2	OK	34.7725	151.518	2.12348	1.83612	0.0006	0.021125	yes
ENSDARG00000091821	smc6	0.822233	1.27466	1.77988	3.72254	8.06185	5.10067	ENSDARG00000091821	smc6	17:6667440-6759149	EGFP	SATB2	OK	1.29226	5.62835	2.12282	1.60555	0.0007	0.0235823	yes
ENSDARG00000098214	CABZ01072487.1	8.87501	0.17188	6.87705	29.5947	9.25287	30.4722	ENSDARG00000098214	CABZ01072487.1	KN150032.1:20-20026	EGFP	SATB2	OK	5.30798	23.1066	2.12207	2.38948	0.0016	0.0402471	yes
ENSDARG00000103739	bahcc1a	1.23402	2.40179	3.25604	7.51722	9.76574	12.6913	ENSDARG00000103739	bahcc1a	3:57038032-57174041	EGFP	SATB2	OK	2.29728	9.99144	2.12076	2.53302	5e-05	0.00325273	yes
ENSDARG00000001442	inppl1b	10.5485	3.13797	5.59911	12.6262	14.8926	56.2553	ENSDARG00000001442	inppl1b	14:32793271-32824408	EGFP	SATB2	OK	6.42853	27.9247	2.11898	2.2085	0.0004	0.0162871	yes
ENSDARG00000075539	snphb	1.85719	4.93346	2.07755	18.256	7.53023	12.5983	ENSDARG00000075539	snphb	23:16620800-16642181	EGFP	SATB2	OK	2.95607	12.7949	2.11381	2.21087	0.0004	0.0162871	yes
ENSDARG00000031164	tuba8l2	2.5715	5.07795	7.1421	16.8777	8.26138	38.7644	ENSDARG00000031164	tuba8l2	1:5402475-5419116	EGFP	SATB2	OK	4.93051	21.3011	2.11112	2.2058	0.0004	0.0162871	yes
ENSDARG00000099672	capgb	5.53833	16.6119	45.193	101.255	106.686	82.57	ENSDARG00000099672	capgb	12:22576403-22618080	EGFP	SATB2	OK	22.4477	96.8369	2.10899	2.24358	5e-05	0.00325273	yes
ENSDARG00000023484	rflna	4.34982	1.25342	3.14154	8.95856	5.0977	23.5746	ENSDARG00000023484	rflna	8:43340994-43363590	EGFP	SATB2	OK	2.91493	12.5436	2.10542	1.90496	0.00225	0.0491677	yes
ENSDARG00000004877	rock2b	4.72928	11.5904	9.15906	27.4801	28.0211	53.6258	ENSDARG00000004877	rock2b	20:33601045-33705044	EGFP	SATB2	OK	8.49292	36.3756	2.09864	1.43856	5e-05	0.00325273	yes
ENSDARG00000099517	adssl1	6.45212	1.25798	6.56419	33.6444	14.5481	12.6791	ENSDARG00000099517	adssl1	17:1323698-1355790	EGFP	SATB2	OK	4.7581	20.2905	2.09235	2.48301	5e-05	0.00325273	yes
ENSDARG00000004301	rhogb	6.23282	7.73754	7.32781	25.2672	42.3652	23.009	ENSDARG00000004301	rhogb	21:30937689-30951909	EGFP	SATB2	OK	7.09939	30.2138	2.08944	2.35994	5e-05	0.00325273	yes
ENSDARG00000030107	si:ch211-207i1.2	0.50572	1.1819	1.24872	6.38842	5.60546	0.448709	ENSDARG00000030107	si:ch211-207i1.2	20:21638396-21806170	EGFP	SATB2	OK	0.978781	4.14753	2.08319	0.861533	0.0008	0.0257994	yes
ENSDARG00000070428	CR854916.1	1.55687	1.07486	2.09992	5.75449	5.65465	8.57088	ENSDARG00000070428	CR854916.1	16:28861341-28878080	EGFP	SATB2	OK	1.57722	6.66001	2.07814	2.0704	0.0011	0.0317639	yes
ENSDARG00000016868	rhobtb4	2.47736	0.640952	10.9292	31.3581	11.1771	16.4192	ENSDARG00000016868	rhobtb4	5:43427840-43502675	EGFP	SATB2	OK	4.68251	19.6515	2.06928	1.95703	0.0019	0.0448531	yes
ENSDARG00000091548	stard9	4.46506	8.09413	3.27551	19.8919	14.3481	31.4349	ENSDARG00000091548	stard9	17:38476299-38554584	EGFP	SATB2	OK	5.27823	21.8916	2.05225	1.21947	0.0002	0.00939378	yes
ENSDARG00000061373	znf142	3.85465	3.28956	2.85187	16.8863	13.3868	11.1195	ENSDARG00000061373	znf142	9:38369871-38399432	EGFP	SATB2	OK	3.33203	13.7975	2.04994	1.85741	0.00105	0.0306722	yes
ENSDARG00000103937	ndrg4	26.5022	9.87176	6.93117	28.1865	36.4924	113.494	ENSDARG00000103937	ndrg4	25:13332279-13381854	EGFP	SATB2	OK	14.435	59.391	2.04067	1.87414	0.0007	0.0235823	yes
ENSDARG00000060641	prkaa2	0.338597	1.39883	0.513058	4.11115	2.05321	3.05097	ENSDARG00000060641	prkaa2	20:8028612-8067973	EGFP	SATB2	OK	0.750162	3.07178	2.0338	1.79915	0.0022	0.0487814	yes
ENSDARG00000039987	hivep2a	2.67756	6.66174	4.95766	10.6604	13.2783	34.0175	ENSDARG00000039987	hivep2a	20:37495156-37629084	EGFP	SATB2	OK	4.76565	19.3187	2.01926	2.21332	0.00035	0.0147006	yes
ENSDARG00000032238	dnm3a	2.1568	5.29972	3.79995	21.9706	11.0491	12.561	ENSDARG00000032238	dnm3a	20:14817629-14925281	EGFP	SATB2	OK	3.75216	15.1936	2.01767	2.12492	0.00015	0.00775308	yes
ENSDARG00000039392	wnk1b	6.39067	9.86901	10.0575	33.2499	30.3949	42.0012	ENSDARG00000039392	wnk1b	4:8045563-8155571	EGFP	SATB2	OK	8.77238	35.2153	2.00516	1.85364	0.0002	0.00939378	yes
ENSDARG00000003421	igf2bp2a	8.02269	2.09424	1.75806	10.6067	23.4329	13.6002	ENSDARG00000003421	igf2bp2a	9:12468499-12575776	EGFP	SATB2	OK	3.95833	15.8799	2.00424	1.94306	0.0014	0.0366412	yes
ENSDARG00000089296	si:dkey-240n22.6	3.5744	1.37137	4.00582	12.9061	12.9168	9.83834	ENSDARG00000089296	si:dkey-240n22.6	4:76926058-76964360	EGFP	SATB2	OK	2.98387	11.8871	1.99414	2.38089	0.0002	0.00939378	yes
ENSDARG00000013310	map3k15	0.566224	0.738042	1.98997	6.90153	2.76558	3.45547	ENSDARG00000013310	map3k15	24:25913161-25989500	EGFP	SATB2	OK	1.09808	4.37419	1.99403	2.00283	0.00175	0.0430633	yes
ENSDARG00000055874	cpe	10.6329	7.94609	7.51994	12.6748	20.8244	70.2527	ENSDARG00000055874	cpe	1:20839481-20911297	EGFP	SATB2	OK	8.69965	34.584	1.99107	2.23278	0.0002	0.00939378	yes
ENSDARG00000103600	st8sia4	2.30095	38.01	8.9199	30.4185	44.9166	118.614	ENSDARG00000103600	st8sia4	10:5667400-5684326	EGFP	SATB2	OK	16.4103	64.6495	1.97804	1.86061	0.00205	0.0471167	yes
ENSDARG00000043646	slc6a8	42.6801	42.4288	44.1059	148.239	37.1363	323.543	ENSDARG00000043646	slc6a8	8:9052122-9118958	EGFP	SATB2	OK	43.0716	169.639	1.97766	2.07007	0.00185	0.0443197	yes
ENSDARG00000019815	fn1a	5.39442	3.73876	8.05527	7.97514	56.523	2.93184	ENSDARG00000019815	fn1a	9:15362299-15424639	EGFP	SATB2	OK	5.72948	22.4766	1.97195	2.36107	0.0002	0.00939378	yes
ENSDARG00000006112	myof	0.863493	0.347955	0.913866	5.93061	2.08584	0.26929	ENSDARG00000006112	myof	12:10517472-10567188	EGFP	SATB2	OK	0.708438	2.76191	1.96296	1.94877	0.00105	0.0306722	yes
ENSDARG00000075757	gig2e	1.0718	11.2052	10.041	33.0903	24.2663	29.2892	ENSDARG00000075757	gig2e	21:22685205-22689846	EGFP	SATB2	OK	7.43931	28.8819	1.95693	2.12002	0.0007	0.0235823	yes
ENSDARG00000025522	sgk1	4.48836	27.264	5.33429	80.6034	46.7932	16.2663	ENSDARG00000025522	sgk1	23:31640238-31693309	EGFP	SATB2	OK	12.3622	47.8876	1.95372	1.75543	0.00115	0.0323817	yes
ENSDARG00000034895	tgfb1b	1.98299	10.8878	4.47922	11.8677	26.6702	28.5668	ENSDARG00000034895	tgfb1b	21:21621041-21629828	EGFP	SATB2	OK	5.78333	22.3682	1.95148	2.0393	0.00025	0.0112297	yes
ENSDARG00000036848	slc43a2a	5.85241	18.07	15.8959	34.9038	31.9584	85.4339	ENSDARG00000036848	slc43a2a	15:28368643-28405742	EGFP	SATB2	OK	13.2728	50.7654	1.93537	2.19237	5e-05	0.00325273	yes
ENSDARG00000051975	cd99	36.6013	47.07	86.9919	224.783	165.503	258.603	ENSDARG00000051975	cd99	1:33336922-33380340	EGFP	SATB2	OK	56.8877	216.296	1.92682	2.16903	0.0002	0.00939378	yes
ENSDARG00000078195	fhit	5.16412	7.17068	6.39549	22.8027	12.4409	35.8157	ENSDARG00000078195	fhit	6:54078702-54080052	EGFP	SATB2	OK	6.24343	23.6865	1.92365	1.97302	0.0012	0.0334155	yes
ENSDARG00000104350	si:dkey-68o6.6	0.965049	6.73661	10.0383	20.6347	23.8082	22.7733	ENSDARG00000104350	si:dkey-68o6.6	3:24603922-24610004	EGFP	SATB2	OK	5.91333	22.4054	1.92181	2.02135	0.00055	0.0199223	yes
ENSDARG00000075156	tbc1d4	12.3632	14.5455	8.56612	35.7709	44.9684	53.321	ENSDARG00000075156	tbc1d4	9:30585551-30639362	EGFP	SATB2	OK	11.825	44.6868	1.91801	1.9168	5e-05	0.00325273	yes
ENSDARG00000061226	timp2a	27.6732	25.063	29.9443	87.3574	74.6545	149.817	ENSDARG00000061226	timp2a	12:33960405-34035364	EGFP	SATB2	OK	27.5601	103.943	1.91514	1.94383	0.00195	0.0457472	yes
ENSDARG00000018404	krt18	76.9367	51.2116	37.882	183.88	140.749	300.557	ENSDARG00000018404	krt18	23:10347850-10351754	EGFP	SATB2	OK	55.3434	208.395	1.91284	1.91079	0.00025	0.0112297	yes
ENSDARG00000091801	serpinb14	7.29229	5.3125	7.30087	44.7376	15.746	14.455	ENSDARG00000091801	serpinb14	16:51244296-51254694	EGFP	SATB2	OK	6.63522	24.9795	1.91253	2.17538	0.0005	0.0187099	yes
ENSDARG00000061517	lrp1bb	1.82748	2.37487	2.08736	10.9642	5.41642	7.28916	ENSDARG00000061517	lrp1bb	9:36314866-36694998	EGFP	SATB2	OK	2.09657	7.88991	1.91198	2.38962	0.00015	0.00775308	yes
ENSDARG00000019420	etnk1	20.8539	26.9642	53.0841	101.339	73.5979	204.063	ENSDARG00000019420	etnk1	4:16885853-16906923	EGFP	SATB2	OK	33.6341	126.333	1.90924	2.02481	0.00015	0.00775308	yes
ENSDARG00000101849	adipor2	17.4016	13.9453	17.2305	29.8525	44.0473	108.134	ENSDARG00000101849	adipor2	4:8670661-8735591	EGFP	SATB2	OK	16.1925	60.678	1.90585	2.13682	0.00075	0.0247511	yes
ENSDARG00000014954	snx33	3.99043	3.08045	3.28838	7.58546	9.10318	22.004	ENSDARG00000014954	snx33	25:6451037-6481191	EGFP	SATB2	OK	3.45309	12.8975	1.90114	2.01858	0.002	0.0465823	yes
ENSDARG00000117428	CR848833.1	3.01392	8.50782	3.68935	39.9254	2.48446	14.2751	ENSDARG00000117428	CR848833.1	1:15355856-15498152	EGFP	SATB2	OK	5.07036	18.895	1.89784	1.80367	0.00205	0.0471167	yes
ENSDARG00000074121	dnmbp	3.90137	12.3493	3.83197	32.5343	17.6625	24.3981	ENSDARG00000074121	dnmbp	12:31638044-31710590	EGFP	SATB2	OK	6.69423	24.865	1.89313	1.87151	0.001	0.029749	yes
ENSDARG00000027249	btg1	12.6669	65.4237	58.7641	192.328	112.352	200.811	ENSDARG00000027249	btg1	4:16536172-16545085	EGFP	SATB2	OK	45.6182	168.497	1.88504	2.10843	0.00025	0.0112297	yes
ENSDARG00000019328	plxna4	0.665283	3.62778	0.851453	12.3407	2.75203	3.82419	ENSDARG00000019328	plxna4	4:15207432-15420452	EGFP	SATB2	OK	1.71484	6.30563	1.87857	1.79519	0.00115	0.0323817	yes
ENSDARG00000106631	tmem63bb	2.00681	2.01263	2.67347	1.36466	15.4359	7.80759	ENSDARG00000106631	tmem63bb	11:43470175-43473824	EGFP	SATB2	OK	2.23097	8.20272	1.87843	1.81302	0.00165	0.0411845	yes
ENSDARG00000103775	thbs1a	1.58612	1.23951	2.98457	14.6001	2.8792	3.87503	ENSDARG00000103775	thbs1a	KN150104.1:1740-17962	EGFP	SATB2	OK	1.93673	7.1181	1.87787	1.96478	0.0007	0.0235823	yes
ENSDARG00000059916	hyal1	5.28203	7.68006	7.56089	32.4648	13.3001	29.3237	ENSDARG00000059916	hyal1	6:54063031-54078623	EGFP	SATB2	OK	6.84099	25.0295	1.87135	2.17511	0.00025	0.0112297	yes
ENSDARG00000104550	clcn2b	2.13833	2.36906	3.87417	8.82065	9.42198	12.3393	ENSDARG00000104550	clcn2b	KN150171.1:22084-130516	EGFP	SATB2	OK	2.79385	10.194	1.86739	2.20579	0.00055	0.0199223	yes
ENSDARG00000061836	nfixb	1.27715	0.939534	1.81202	6.64915	3.20317	4.76653	ENSDARG00000061836	nfixb	3:14768363-15058464	EGFP	SATB2	OK	1.3429	4.87295	1.85944	1.86296	0.0016	0.0402471	yes
ENSDARG00000014907	htra1b	2.11414	0.642694	2.25746	6.1177	7.49188	4.57813	ENSDARG00000014907	htra1b	12:11388723-11457625	EGFP	SATB2	OK	1.67143	6.06257	1.85885	2.05276	0.00145	0.0374305	yes
ENSDARG00000045681	irf5	1.07401	1.69991	3.26651	7.63505	6.46781	7.79517	ENSDARG00000045681	irf5	4:13605599-13614936	EGFP	SATB2	OK	2.01348	7.29934	1.85808	1.75551	0.0021	0.047685	yes
ENSDARG00000010946	cbsb	6.65321	8.83362	8.83032	34.8516	26.9049	26.2783	ENSDARG00000010946	cbsb	9:9180619-9228941	EGFP	SATB2	OK	8.10571	29.3449	1.8561	2.274	0.0002	0.00939378	yes
ENSDARG00000045847	si:ch211-214j24.10	6.61753	18.5461	18.7245	44.5318	69.9106	43.9911	ENSDARG00000045847	si:ch211-214j24.10	4:5317482-5325336	EGFP	SATB2	OK	14.6294	52.8112	1.85198	2.11369	0.00045	0.0174744	yes
ENSDARG00000068432	si:dkey-56m19.5	3.15564	6.63718	5.29141	4.97982	16.391	32.8392	ENSDARG00000068432	si:dkey-56m19.5	7:44713134-44717498	EGFP	SATB2	OK	5.02807	18.07	1.84552	2.07459	0.00035	0.0147006	yes
ENSDARG00000045596	rassf8a	7.2986	3.55861	7.50419	2.03618	30.2147	33.4568	ENSDARG00000045596	rassf8a	25:31122805-31162816	EGFP	SATB2	OK	6.12047	21.9025	1.83939	2.04079	0.0005	0.0187099	yes
ENSDARG00000077864	rasgrp3	10.031	5.61405	13.5141	23.059	53.2041	27.4886	ENSDARG00000077864	rasgrp3	17:23146975-23201215	EGFP	SATB2	OK	9.71974	34.5839	1.83111	2.2491	0.00025	0.0112297	yes
ENSDARG00000074617	wfs1b	2.69777	1.51569	3.88856	7.48824	6.60622	14.5254	ENSDARG00000074617	wfs1b	14:17329894-17351159	EGFP	SATB2	OK	2.70067	9.53994	1.82066	2.21355	0.0006	0.021125	yes
ENSDARG00000038025	cbx7a	6.95295	10.749	18.6024	36.0895	21.6765	69.8913	ENSDARG00000038025	cbx7a	3:24986144-24994617	EGFP	SATB2	OK	12.1014	42.5524	1.81406	2.08318	0.0004	0.0162871	yes
ENSDARG00000042816	mmp9	7.33196	4.56599	12.4952	33.0168	48.0525	4.63617	ENSDARG00000042816	mmp9	8:24281511-24295947	EGFP	SATB2	OK	8.13106	28.5685	1.81291	1.88243	0.0001	0.00571692	yes
ENSDARG00000038398	pmm1	4.16628	14.2559	10.4495	57.0697	25.6211	18.7002	ENSDARG00000038398	pmm1	3:3810918-3821845	EGFP	SATB2	OK	9.62388	33.797	1.81221	1.94127	0.0015	0.0385892	yes
ENSDARG00000092347	si:dkey-161j23.6	5.12923	2.09281	2.54007	8.9147	7.07135	18.097	ENSDARG00000092347	si:dkey-161j23.6	24:39576070-39580236	EGFP	SATB2	OK	3.25404	11.361	1.80379	1.8383	0.00185	0.0443197	yes
ENSDARG00000095865	oxr1a	1.57134	2.5572	1.7262	6.63796	6.87998	6.89965	ENSDARG00000095865	oxr1a	16:43417631-43742318	EGFP	SATB2	OK	1.95158	6.80586	1.80214	2.01347	0.00045	0.0174744	yes
ENSDARG00000090971	cc2d2a	2.86877	2.84273	2.60943	3.69287	6.62824	18.6151	ENSDARG00000090971	cc2d2a	23:2191772-2260732	EGFP	SATB2	OK	2.77364	9.64539	1.79806	2.01473	0.0016	0.0402471	yes
ENSDARG00000076171	znf827	3.8886	3.68692	3.27369	21.7966	5.73646	10.1623	ENSDARG00000076171	znf827	1:36017866-36152131	EGFP	SATB2	OK	3.6164	12.5651	1.7968	2.09419	0.001	0.029749	yes
ENSDARG00000041703	rrbp1b	0.650361	2.83496	1.55427	4.47332	10.5568	2.47875	ENSDARG00000041703	rrbp1b	22:25086566-25137256	EGFP	SATB2	OK	1.67986	5.8363	1.79671	1.92707	0.0021	0.047685	yes
ENSDARG00000052139	notch3	8.84764	8.13501	13.0012	28.6092	27.2226	48.0608	ENSDARG00000052139	notch3	3:53526024-53559581	EGFP	SATB2	OK	9.99461	34.6309	1.79284	2.11326	0.0007	0.0235823	yes
ENSDARG00000002396	cry-dash	2.97269	0.900996	6.99581	4.1854	15.2256	18.251	ENSDARG00000002396	cry-dash	24:20194021-20208474	EGFP	SATB2	OK	3.62317	12.554	1.79283	1.84367	0.0013	0.0349533	yes
ENSDARG00000014098	pkd2	2.616	5.50986	2.47975	11.5707	6.56705	18.4533	ENSDARG00000014098	pkd2	1:50538838-50557030	EGFP	SATB2	OK	3.5352	12.197	1.78667	2.11687	0.0005	0.0187099	yes
ENSDARG00000114113	CABZ01030006.1	2.35382	5.53635	4.55854	15.1935	5.46681	22.0685	ENSDARG00000114113	CABZ01030006.1	KN150258.1:33005-36502	EGFP	SATB2	OK	4.14957	14.2429	1.77921	1.75166	0.0023	0.049923	yes
ENSDARG00000104117	fzd4	1.38019	2.41147	1.4219	4.14053	6.12034	7.61893	ENSDARG00000104117	fzd4	KN150617.1:66380-79211	EGFP	SATB2	OK	1.73785	5.95993	1.77799	1.80133	0.00125	0.0343431	yes
ENSDARG00000105117	sdad1	7.59582	12.7352	10.1303	13.8176	17.7024	72.7118	ENSDARG00000105117	sdad1	21:9366966-9384374	EGFP	SATB2	OK	10.1538	34.7439	1.77474	1.71721	0.0013	0.0349533	yes
ENSDARG00000060309	srgap3	10.1382	7.82841	17.6803	21.2351	17.1028	82.9222	ENSDARG00000060309	srgap3	6:41554793-41757181	EGFP	SATB2	OK	11.8823	40.42	1.76625	1.02155	0.00035	0.0147006	yes
ENSDARG00000006420	atrnl1b	3.8954	2.84214	2.98549	9.34359	7.59316	16.0097	ENSDARG00000006420	atrnl1b	12:29842835-30032188	EGFP	SATB2	OK	3.24101	10.9822	1.76064	2.1371	0.00025	0.0112297	yes
ENSDARG00000103457	spartb	2.92206	5.47672	4.32686	14.9034	10.7556	17.4159	ENSDARG00000103457	spartb	15:32798332-32818871	EGFP	SATB2	OK	4.24188	14.3583	1.75911	2.064	0.00045	0.0174744	yes
ENSDARG00000079144	bcl2l11	18.5866	12.9241	12.5144	42.7883	47.2214	58.8877	ENSDARG00000079144	bcl2l11	13:47361103-47403443	EGFP	SATB2	OK	14.675	49.6325	1.75792	1.89628	0.0018	0.0435831	yes
ENSDARG00000078979	arhgef40	1.34899	1.83626	1.26185	4.55364	5.3925	5.04667	ENSDARG00000078979	arhgef40	7:73488034-73571518	EGFP	SATB2	OK	1.48237	4.9976	1.75334	2.09352	0.00065	0.0224319	yes
ENSDARG00000001968	dock5	3.50393	1.68032	5.38171	18.5883	4.82606	12.1431	ENSDARG00000001968	dock5	8:6651252-6825588	EGFP	SATB2	OK	3.52199	11.8525	1.75073	1.89282	0.00135	0.0357458	yes
ENSDARG00000069958	sh2b3	11.0779	7.25989	11.893	42.7841	23.6155	35.3165	ENSDARG00000069958	sh2b3	5:9556942-9625459	EGFP	SATB2	OK	10.0769	33.9054	1.75046	1.92007	0.001	0.029749	yes
ENSDARG00000074184	arhgap32b	3.49124	4.57938	1.86707	19.8848	5.43314	8.11624	ENSDARG00000074184	arhgap32b	21:24539895-24632778	EGFP	SATB2	OK	3.31256	11.1447	1.75034	2.06069	0.00055	0.0199223	yes
ENSDARG00000098955	ssh2b	7.8125	13.5391	11.6456	36.2673	36.5931	36.7662	ENSDARG00000098955	ssh2b	21:40417115-40475727	EGFP	SATB2	OK	10.9991	36.5422	1.73218	1.28414	0.0005	0.0187099	yes
ENSDARG00000004055	uhrf1bp1l	1.28199	3.03809	2.42273	8.80586	7.53891	5.92675	ENSDARG00000004055	uhrf1bp1l	4:18207654-18281160	EGFP	SATB2	OK	2.24761	7.42384	1.72378	2.02416	0.00165	0.0411845	yes
ENSDARG00000101018	ptdss2	7.07111	5.92208	5.5631	10.1654	19.1769	30.9617	ENSDARG00000101018	ptdss2	25:7532626-7564696	EGFP	SATB2	OK	6.18543	20.1013	1.70035	2.0031	0.00115	0.0323817	yes
ENSDARG00000053425	serinc2l	9.8597	7.07302	7.83396	26.8758	20.3924	32.3983	ENSDARG00000053425	serinc2l	16:34459065-34477805	EGFP	SATB2	OK	8.25556	26.5555	1.68557	1.94796	0.00115	0.0323817	yes
ENSDARG00000009336	aif1l	5.88959	7.87455	26.3436	8.23609	67.5966	52.5735	ENSDARG00000009336	aif1l	5:34549364-34575502	EGFP	SATB2	OK	13.3692	42.802	1.67876	1.95302	0.00135	0.0357458	yes
ENSDARG00000077052	tnrc18	4.60274	9.07269	12.0472	36.0894	20.0357	26.1752	ENSDARG00000077052	tnrc18	3:40407351-40488846	EGFP	SATB2	OK	8.57421	27.4334	1.67786	1.89944	0.0009	0.0279878	yes
ENSDARG00000029524	impdh1b	26.2184	36.0599	24.2683	18.562	140.386	113.904	ENSDARG00000029524	impdh1b	4:18960913-18985481	EGFP	SATB2	OK	28.8489	90.9505	1.65657	1.70105	0.00185	0.0443197	yes
ENSDARG00000069928	prkceb	3.51163	3.49308	3.28957	5.9662	12.939	13.487	ENSDARG00000069928	prkceb	13:8452353-8601184	EGFP	SATB2	OK	3.43143	10.7974	1.6538	1.98335	0.001	0.029749	yes
ENSDARG00000055857	dop1b	4.91426	6.60452	9.4742	13.8525	30.047	22.077	ENSDARG00000055857	dop1b	9:33174063-33195586	EGFP	SATB2	OK	6.99766	21.9922	1.65205	1.88916	0.0019	0.0448531	yes
ENSDARG00000101752	plekhg5b	1.32156	1.87595	2.90534	10.7916	3.07104	5.28172	ENSDARG00000101752	plekhg5b	23:37579106-37720166	EGFP	SATB2	OK	2.03428	6.38147	1.64937	1.77841	0.0022	0.0487814	yes
ENSDARG00000042751	riok3	24.1283	28.3072	16.1666	37.9772	80.3063	96.805	ENSDARG00000042751	riok3	24:36239616-36253217	EGFP	SATB2	OK	22.8674	71.6962	1.64861	2.08958	0.0005	0.0187099	yes
ENSDARG00000091003	il34	7.44631	4.42145	14.9072	15.7746	26.4427	40.4176	ENSDARG00000091003	il34	18:18527169-18543358	EGFP	SATB2	OK	8.92498	27.545	1.62587	1.96235	0.0014	0.0366412	yes
ENSDARG00000045075	tmem106a	25.2405	33.3058	24.1801	50.8754	106.997	96.1222	ENSDARG00000045075	tmem106a	12:27231211-27242533	EGFP	SATB2	OK	27.5755	84.6648	1.61838	1.76578	0.00215	0.0483835	yes
ENSDARG00000098817	CABZ01055522.1	7.12922	5.93717	7.4427	20.4703	12.9267	29.1603	ENSDARG00000098817	CABZ01055522.1	24:37274758-37287792	EGFP	SATB2	OK	6.83637	20.8524	1.60891	2.00282	0.00115	0.0323817	yes
ENSDARG00000035256	eef2l2	5.62073	6.01833	2.30082	4.72249	9.76995	28.021	ENSDARG00000035256	eef2l2	5:41485276-41494831	EGFP	SATB2	OK	4.64663	14.1712	1.6087	1.67999	0.00115	0.0323817	yes
ENSDARG00000005126	large1	3.61788	9.35138	4.8665	15.462	20.4679	18.3537	ENSDARG00000005126	large1	4:75013306-75057322	EGFP	SATB2	OK	5.94525	18.0946	1.60575	1.9509	0.0014	0.0366412	yes
ENSDARG00000054438	fzd2	7.27129	4.68937	16.6788	15.4688	28.0368	43.5447	ENSDARG00000054438	fzd2	3:31621773-31624213	EGFP	SATB2	OK	9.54648	29.0167	1.60384	1.90898	0.00165	0.0411845	yes
ENSDARG00000062352	sema4ab	11.3837	17.1618	14.8369	30.1288	30.2365	71.4086	ENSDARG00000062352	sema4ab	19:24324966-24392370	EGFP	SATB2	OK	14.4608	43.9247	1.60288	1.7778	0.00205	0.0471167	yes
ENSDARG00000029766	nr1i2	4.92502	1.95311	4.30239	10.1469	11.8921	11.7553	ENSDARG00000029766	nr1i2	9:9502609-9562644	EGFP	SATB2	OK	3.72684	11.2648	1.59579	1.89826	0.0018	0.0435831	yes
ENSDARG00000060006	nedd4l	7.33616	7.52698	9.44249	33.7918	16.5693	22.8254	ENSDARG00000060006	nedd4l	21:10890257-11054876	EGFP	SATB2	OK	8.10188	24.3955	1.59029	1.88965	0.00155	0.0394718	yes
ENSDARG00000029072	klf6a	34.1524	52.7311	64.2828	135.116	159.816	159.633	ENSDARG00000029072	klf6a	24:4141483-4148915	EGFP	SATB2	OK	50.3888	151.522	1.58835	1.88371	0.00175	0.0430633	yes
ENSDARG00000095268	si:dkey-261h17.1	6.30756	16.3378	20.3387	68.2364	37.865	22.4211	ENSDARG00000095268	si:dkey-261h17.1	23:32499915-32532612	EGFP	SATB2	OK	14.328	42.8408	1.58015	1.81804	0.0022	0.0487814	yes
ENSDARG00000062304	pdpk1a	3.10193	3.33622	9.70195	14.2637	10.5179	22.8172	ENSDARG00000062304	pdpk1a	3:45283390-45308394	EGFP	SATB2	OK	5.38003	15.8663	1.56028	1.90042	0.00185	0.0443197	yes
ENSDARG00000057918	tsc1b	6.50291	12.2032	14.3988	29.0347	26.3719	41.1666	ENSDARG00000057918	tsc1b	21:17301789-17339832	EGFP	SATB2	OK	11.035	32.1911	1.54458	1.91373	0.0017	0.0423858	yes
ENSDARG00000079009	abca1b	4.83959	4.3402	10.9651	35.3808	8.79928	14.4269	ENSDARG00000079009	abca1b	14:6423972-6519076	EGFP	SATB2	OK	6.71495	19.5357	1.54066	1.43466	0.0021	0.047685	yes
ENSDARG00000038281	natd1	13.5827	15.5114	34.9035	53.6367	43.2155	88.1892	ENSDARG00000038281	natd1	3:15817643-15824100	EGFP	SATB2	OK	21.3325	61.6805	1.53176	1.96762	0.0014	0.0366412	yes
ENSDARG00000091411	si:ch211-214p13.9	37.2745	47.0013	24.1535	90.6244	99.2327	122.881	ENSDARG00000091411	si:ch211-214p13.9	9:9415659-9419704	EGFP	SATB2	OK	36.1431	104.246	1.5282	1.89361	0.0006	0.021125	yes
ENSDARG00000086256	si:ch211-236p5.2	4.64813	3.11718	5.02534	10.1515	12.4063	13.8139	ENSDARG00000086256	si:ch211-236p5.2	17:8270863-8287309	EGFP	SATB2	OK	4.26355	12.1239	1.50772	1.94265	0.00195	0.0457472	yes
ENSDARG00000005416	map3k5	5.90156	13.2193	8.59343	20.543	24.221	33.1849	ENSDARG00000005416	map3k5	20:3005471-3087162	EGFP	SATB2	OK	9.2381	25.983	1.4919	1.25524	0.0009	0.0279878	yes
ENSDARG00000076041	wwc1	3.75281	3.25743	4.1613	11.6937	10.3015	9.26403	ENSDARG00000076041	wwc1	21:36465938-36571804	EGFP	SATB2	OK	3.72385	10.4198	1.48445	1.86514	0.0013	0.0349533	yes
ENSDARG00000078188	fam160a2	5.56654	7.02113	4.73065	14.3956	15.6828	18.3146	ENSDARG00000078188	fam160a2	9:32895002-32912638	EGFP	SATB2	OK	5.77277	16.131	1.4825	1.88963	0.0014	0.0366412	yes
ENSDARG00000063126	gusb	13.7296	6.36889	20.2819	27.9563	51.6946	32.8054	ENSDARG00000063126	gusb	5:2066261-2112030	EGFP	SATB2	OK	13.4602	37.4855	1.47764	1.87235	0.0013	0.0349533	yes
ENSDARG00000039974	rai14	6.17617	8.36527	4.12472	18.5869	17.6266	14.8449	ENSDARG00000039974	rai14	21:19547805-19608698	EGFP	SATB2	OK	6.22205	17.0195	1.45173	1.61175	0.00205	0.0471167	yes
ENSDARG00000041502	tgfb1a	3.94884	3.59041	5.06235	13.2019	9.33965	11.8816	ENSDARG00000041502	tgfb1a	15:2776505-2803313	EGFP	SATB2	OK	4.20053	11.4744	1.44977	1.81765	0.00115	0.0323817	yes
ENSDARG00000002663	optn	6.96485	12.9595	8.31691	21.5373	23.1741	32.1456	ENSDARG00000002663	optn	4:8016456-8027318	EGFP	SATB2	OK	9.41376	25.619	1.44437	1.80461	0.00215	0.0483835	yes
ENSDARG00000013990	ube2q2	19.7923	22.3292	15.9492	39.8935	39.869	77.514	ENSDARG00000013990	ube2q2	25:29427851-29463951	EGFP	SATB2	OK	19.3569	52.4255	1.43742	1.77461	0.0022	0.0487814	yes
ENSDARG00000099148	bzw1b	47.795	58.8816	24.2943	155.738	95.015	92.5945	ENSDARG00000099148	bzw1b	9:426391-433915	EGFP	SATB2	OK	43.657	114.449	1.39042	1.61501	0.0016	0.0402471	yes
ENSDARG00000038743	copb2	106.208	93.3237	95.4522	37.65	45.793	33.5994	ENSDARG00000038743	copb2	2:38997356-39015130	EGFP	SATB2	OK	98.3281	39.0141	-1.33361	-1.39371	0.00215	0.0483835	yes
ENSDARG00000042539	ywhaqa	59.7159	48.7079	67.325	22.6102	22.9248	22.1328	ENSDARG00000042539	ywhaqa	20:29565905-29585336	EGFP	SATB2	OK	58.5829	22.5559	-1.37697	-1.81487	0.00155	0.0394718	yes
ENSDARG00000105147	osbpl1a	31.0433	39.1206	36.7394	18.9474	15.1488	6.64258	ENSDARG00000105147	osbpl1a	22:16320075-16348536	EGFP	SATB2	OK	35.6344	13.5796	-1.39183	-1.74876	0.00175	0.0430633	yes
ENSDARG00000045006	ptprga	38.6444	15.8041	26.7439	10.4434	8.33699	12.1066	ENSDARG00000045006	ptprga	11:4953963-5463254	EGFP	SATB2	OK	27.0642	10.2957	-1.39434	-1.72755	0.00175	0.0430633	yes
ENSDARG00000013044	ndufv2	64.1331	43.5092	52.4956	18.0149	19.7496	22.5555	ENSDARG00000013044	ndufv2	2:54641643-54690184	EGFP	SATB2	OK	53.3793	20.1067	-1.40861	-1.7431	0.0021	0.047685	yes
ENSDARG00000099479	SYDE2	7.81679	22.4576	7.56851	3.92126	5.43496	4.87412	ENSDARG00000099479	SYDE2	23:46002858-46020226	EGFP	SATB2	OK	12.6143	4.74345	-1.41105	-1.75188	0.00215	0.0483835	yes
ENSDARG00000070239	knl1	15.0881	4.42127	6.68751	2.43369	3.62686	3.63178	ENSDARG00000070239	knl1	1:11086956-11104805	EGFP	SATB2	OK	8.73229	3.23078	-1.43448	-1.77209	0.0022	0.0487814	yes
ENSDARG00000052348	smarca5	31.028	18.8879	17.4949	8.42972	7.38473	8.51337	ENSDARG00000052348	smarca5	1:52792438-52820954	EGFP	SATB2	OK	22.4702	8.10927	-1.47037	-1.87285	0.00145	0.0374305	yes
ENSDARG00000015749	hps3	30.0627	35.8566	77.6597	10.0612	29.6358	11.6654	ENSDARG00000015749	hps3	22:38202613-38224321	EGFP	SATB2	OK	47.8597	17.1208	-1.48306	-1.67449	0.0021	0.047685	yes
ENSDARG00000053810	hnrnpc	43.0301	32.6483	24.5138	5.44478	16.0969	14.1967	ENSDARG00000053810	hnrnpc	2:38025259-38034190	EGFP	SATB2	OK	33.3974	11.9128	-1.48722	-1.85975	0.0007	0.0235823	yes
ENSDARG00000071586	tgfbi	17.2653	26.2342	23.3214	6.37645	4.94478	12.3441	ENSDARG00000071586	tgfbi	14:26511040-26536504	EGFP	SATB2	OK	22.2737	7.88843	-1.49753	-1.79461	0.00175	0.0430633	yes
ENSDARG00000087186	si:ch211-232b12.5	28.9949	17.5498	21.7759	11.555	6.5793	6.01255	ENSDARG00000087186	si:ch211-232b12.5	11:25313809-25324534	EGFP	SATB2	OK	22.7736	8.04894	-1.50049	-1.91999	0.0011	0.0317639	yes
ENSDARG00000035880	atp6v1c1b	50.6223	40.3976	24.5865	9.00161	17.5203	14.2781	ENSDARG00000035880	atp6v1c1b	19:32947909-32966762	EGFP	SATB2	OK	38.5355	13.6	-1.50258	-1.82066	0.00175	0.0430633	yes
ENSDARG00000097414	si:ch211-106e7.2	28.396	6.13926	19.4138	8.12209	7.34008	3.40441	ENSDARG00000097414	si:ch211-106e7.2	25:28862659-28892882	EGFP	SATB2	OK	17.983	6.28886	-1.51576	-1.91931	0.00105	0.0306722	yes
ENSDARG00000103824	hint1	182.261	156.757	130.49	50.1002	62.4395	51.6414	ENSDARG00000103824	hint1	10:7636810-7640797	EGFP	SATB2	OK	156.503	54.727	-1.51586	-1.92137	0.00125	0.0343431	yes
ENSDARG00000021405	chd3	11.6035	15.8544	13.172	5.547	3.44606	5.04133	ENSDARG00000021405	chd3	7:20673286-20758828	EGFP	SATB2	OK	13.5433	4.67813	-1.53358	-1.9476	0.00075	0.0247511	yes
ENSDARG00000059035	porb	20.6546	39.9572	19.0426	12.6849	6.3563	8.45014	ENSDARG00000059035	porb	15:1847134-1885247	EGFP	SATB2	OK	26.5515	9.16379	-1.53478	-1.85466	0.00115	0.0323817	yes
ENSDARG00000063007	apc2	4.96751	1.37942	3.66507	1.19151	0.693342	1.55246	ENSDARG00000063007	apc2	11:7281239-7320211	EGFP	SATB2	OK	3.33734	1.14577	-1.54238	-1.75854	0.00215	0.0483835	yes
ENSDARG00000014692	znf622	24.5902	37.8308	21.8118	6.51918	10.1297	12.2373	ENSDARG00000014692	znf622	2:41563072-41571454	EGFP	SATB2	OK	28.0776	9.62872	-1.544	-1.89352	0.0019	0.0448531	yes
ENSDARG00000018426	aldh7a1	31.9205	27.6236	74.3433	10.787	14.2042	20.7574	ENSDARG00000018426	aldh7a1	10:16006904-16028082	EGFP	SATB2	OK	44.6291	15.2495	-1.54922	-1.89586	0.00135	0.0357458	yes
ENSDARG00000005612	aph1b	91.3221	83.4997	65.9863	19.8674	35.3048	26.7658	ENSDARG00000005612	aph1b	7:29176923-29186939	EGFP	SATB2	OK	80.2694	27.3127	-1.55528	-1.8657	0.00125	0.0343431	yes
ENSDARG00000053990	hmgb2b	212.251	149.848	235.08	25.3659	89.5424	86.7065	ENSDARG00000053990	hmgb2b	23:45025908-45029559	EGFP	SATB2	OK	199.06	67.2049	-1.56656	-1.7232	0.00205	0.0471167	yes
ENSDARG00000017140	zgc:63587	89.6025	30.313	119.758	30.3694	18.6528	31.8666	ENSDARG00000017140	zgc:63587	8:4621242-4694458	EGFP	SATB2	OK	79.8911	26.9629	-1.56706	-1.98228	0.0013	0.0349533	yes
ENSDARG00000062415	ctnnd2a	2.51378	12.1946	5.66465	2.57658	1.66051	2.63464	ENSDARG00000062415	ctnnd2a	24:22118803-22702017	EGFP	SATB2	OK	6.79103	2.29058	-1.56792	-1.52018	0.0023	0.049923	yes
ENSDARG00000037815	b4galt5	95.1215	125.422	198.672	45.1545	45.2123	50.9108	ENSDARG00000037815	b4galt5	23:4022619-4071748	EGFP	SATB2	OK	139.739	47.0925	-1.56916	-1.90727	0.00145	0.0374305	yes
ENSDARG00000046132	dynlt3	207.426	66.5188	97.5702	24.3759	50.9233	49.3902	ENSDARG00000046132	dynlt3	11:29790625-29794308	EGFP	SATB2	OK	123.838	41.5631	-1.57508	-1.99256	0.0011	0.0317639	yes
ENSDARG00000071670	tma7	67.117	65.0656	73.7628	15.4858	28.662	24.8581	ENSDARG00000071670	tma7	22:5663528-5682494	EGFP	SATB2	OK	68.6485	23.002	-1.57747	-1.92958	0.00095	0.0289462	yes
ENSDARG00000099439	serp1	81.7201	27.7314	67.4996	11.6152	25.4175	22.2236	ENSDARG00000099439	serp1	18:3572313-3576434	EGFP	SATB2	OK	58.9837	19.7521	-1.57831	-1.8751	0.0023	0.049923	yes
ENSDARG00000041108	ctsh	42.3651	27.1284	88.6377	12.9051	22.6817	16.9379	ENSDARG00000041108	ctsh	18:26422123-26428525	EGFP	SATB2	OK	52.7104	17.5083	-1.59005	-1.84533	0.00055	0.0199223	yes
ENSDARG00000053446	sub1a	164.755	100.584	149.223	33.251	46.9709	57.2003	ENSDARG00000053446	sub1a	10:8091143-8098099	EGFP	SATB2	OK	138.188	45.8074	-1.59298	-1.96644	0.0007	0.0235823	yes
ENSDARG00000060925	jarid2a	18.095	8.37259	8.60668	4.61594	3.35256	3.62905	ENSDARG00000060925	jarid2a	16:25407020-25500729	EGFP	SATB2	OK	11.6914	3.86585	-1.59659	-1.95195	0.00085	0.0269135	yes
ENSDARG00000096554	si:dkey-25o16.4	17.6757	5.45915	8.37183	2.88895	3.27538	4.21426	ENSDARG00000096554	si:dkey-25o16.4	1:26676757-26700439	EGFP	SATB2	OK	10.5022	3.45953	-1.60205	-1.98486	0.0008	0.0257994	yes
ENSDARG00000014731	cacybp	35.5949	33.1004	32.4029	6.8426	17.9192	8.54086	ENSDARG00000014731	cacybp	2:35595453-35601370	EGFP	SATB2	OK	33.6994	11.1009	-1.60205	-1.89944	0.00095	0.0289462	yes
ENSDARG00000011301	nae1	38.0065	30.9768	20.7526	5.07064	11.8851	12.5802	ENSDARG00000011301	nae1	7:44773911-44794322	EGFP	SATB2	OK	29.912	9.84531	-1.60321	-1.97841	0.0005	0.0187099	yes
ENSDARG00000032637	si:dkey-261m9.12	89.4238	51.3128	14.1601	15.5363	17.7883	17.572	ENSDARG00000032637	si:dkey-261m9.12	25:35141527-35142127	EGFP	SATB2	OK	51.6322	16.9655	-1.60567	-1.8495	0.00225	0.0491677	yes
ENSDARG00000036427	slc3a2a	216.113	133.77	207.916	73.1783	64.9877	44.8269	ENSDARG00000036427	slc3a2a	7:20524063-20530447	EGFP	SATB2	OK	185.933	60.9977	-1.60796	-1.6154	0.00015	0.00775308	yes
ENSDARG00000015757	tmem50a	150.414	51.2392	145.159	19.098	61.395	33.0993	ENSDARG00000015757	tmem50a	13:45485184-45495562	EGFP	SATB2	OK	115.604	37.8641	-1.61029	-1.89196	0.0012	0.0334155	yes
ENSDARG00000036542	pknox1.2	22.7306	40.9542	14.5559	10.8273	6.68504	8.00611	ENSDARG00000036542	pknox1.2	1:46963992-46984142	EGFP	SATB2	OK	26.0802	8.50615	-1.61638	-1.93728	0.00175	0.0430633	yes
ENSDARG00000002305	me3	40.5137	25.7057	42.3809	9.44578	13.0452	12.7758	ENSDARG00000002305	me3	9:34246383-34260214	EGFP	SATB2	OK	36.2001	11.7556	-1.62265	-2.06256	0.0008	0.0257994	yes
ENSDARG00000111188	cdaa	33.2057	29.5628	59.4745	15.0473	17.8704	6.54224	ENSDARG00000111188	cdaa	23:37458601-37466323	EGFP	SATB2	OK	40.7477	13.1533	-1.63129	-2.00528	0.0013	0.0349533	yes
ENSDARG00000021702	pdcd4a	103.728	37.7274	130.446	22.9696	17.083	46.829	ENSDARG00000021702	pdcd4a	1:26046147-26071535	EGFP	SATB2	OK	90.6338	28.9606	-1.64596	-1.7722	0.0023	0.049923	yes
ENSDARG00000070357	cx39.4	276.893	242.695	105.731	59.368	55.704	84.6025	ENSDARG00000070357	cx39.4	19:37153408-37154436	EGFP	SATB2	OK	208.44	66.5582	-1.64694	-2.07279	0.0003	0.0130109	yes
ENSDARG00000061301	gmpr2	62.5454	49.7284	36.7127	6.21136	20.5268	20.6811	ENSDARG00000061301	gmpr2	7:24196541-24204665	EGFP	SATB2	OK	49.6622	15.8064	-1.65163	-2.02806	0.0005	0.0187099	yes
ENSDARG00000075007	chst2a	68.0028	27.6535	82.0966	12.8495	25.8585	17.8454	ENSDARG00000075007	chst2a	2:8112448-8114608	EGFP	SATB2	OK	59.251	18.8511	-1.65219	-1.99061	0.00035	0.0147006	yes
ENSDARG00000022509	cox4i2	139.522	64.5168	138.227	23.7346	27.9934	57.1124	ENSDARG00000022509	cox4i2	23:18944387-18951148	EGFP	SATB2	OK	114.089	36.2801	-1.6529	-2.01876	0.0009	0.0279878	yes
ENSDARG00000094154	hist2h3c	373.779	210.374	76.9306	67.3185	65.7714	77.054	ENSDARG00000094154	hist2h3c	25:35051655-35052155	EGFP	SATB2	OK	220.361	70.0479	-1.65346	-1.96324	0.0013	0.0349533	yes
ENSDARG00000103919	si:ch73-1a9.3	247.155	111.537	201.941	58.2478	61.0802	58.4018	ENSDARG00000103919	si:ch73-1a9.3	10:39028330-39123213	EGFP	SATB2	OK	186.878	59.2433	-1.65737	-1.9919	0.00095	0.0289462	yes
ENSDARG00000071082	p4ha1b	34.5155	8.40586	17.6928	8.21989	3.66015	7.15559	ENSDARG00000071082	p4ha1b	17:20144625-20167236	EGFP	SATB2	OK	20.2047	6.34521	-1.67095	-1.91493	0.00135	0.0357458	yes
ENSDARG00000015385	ndufs3	86.7531	48.5092	42.852	8.12167	19.9084	27.4803	ENSDARG00000015385	ndufs3	7:38588865-38594602	EGFP	SATB2	OK	59.3714	18.5035	-1.68197	-1.99213	0.00115	0.0323817	yes
ENSDARG00000059483	tead1b	17.9678	8.28247	13.0642	5.08522	3.95295	3.21377	ENSDARG00000059483	tead1b	7:65813300-65924821	EGFP	SATB2	OK	13.1048	4.08398	-1.68205	-1.63312	0.0003	0.0130109	yes
ENSDARG00000062812	glsa	15.0859	35.3847	16.6884	7.13044	7.41166	6.38396	ENSDARG00000062812	glsa	22:12831674-12862415	EGFP	SATB2	OK	22.3863	6.97535	-1.68228	-1.88686	0.0018	0.0435831	yes
ENSDARG00000076532	si:ch211-222l21.1	66.056	93.321	64.9022	22.4156	28.3389	18.6446	ENSDARG00000076532	si:ch211-222l21.1	11:40677615-40696136	EGFP	SATB2	OK	74.7597	23.133	-1.69231	-2.13698	0.0001	0.00571692	yes
ENSDARG00000109737	zgc:171759	210.844	114.601	37.7187	34.2238	29.638	48.5047	ENSDARG00000109737	zgc:171759	25:36333992-36334367	EGFP	SATB2	OK	121.054	37.4555	-1.69241	-1.86642	0.00125	0.0343431	yes
ENSDARG00000096214	si:ch211-197k17.3	15.5914	24.0187	11.4715	5.58277	5.62853	4.5161	ENSDARG00000096214	si:ch211-197k17.3	1:54758574-54765262	EGFP	SATB2	OK	17.0272	5.24247	-1.69952	-2.02602	0.0012	0.0334155	yes
ENSDARG00000057683	mcm6	14.3047	15.9895	29.9906	3.83241	11.1684	3.54348	ENSDARG00000057683	mcm6	6:12968100-12985390	EGFP	SATB2	OK	20.0949	6.18143	-1.70082	-1.99124	0.0006	0.021125	yes
ENSDARG00000098286	CU695232.1	57.6378	18.8143	52.9757	13.2366	17.7239	8.69622	ENSDARG00000098286	CU695232.1	13:46803978-46818627	EGFP	SATB2	OK	43.1426	13.2189	-1.70651	-1.98427	0.001	0.029749	yes
ENSDARG00000007247	ric8a	7.49695	6.91301	8.78999	2.61471	2.10612	2.36689	ENSDARG00000007247	ric8a	25:10458989-10483226	EGFP	SATB2	OK	7.73332	2.36257	-1.71073	-1.91488	0.0012	0.0334155	yes
ENSDARG00000052721	prim2	23.9984	8.70025	17.789	3.59769	7.66791	4.14707	ENSDARG00000052721	prim2	13:23488281-23612369	EGFP	SATB2	OK	16.8292	5.13756	-1.71181	-1.63731	0.0019	0.0448531	yes
ENSDARG00000035470	sh3glb2b	25.5038	25.9081	55.9035	12.4835	12.5357	7.68146	ENSDARG00000035470	sh3glb2b	5:31640880-31689911	EGFP	SATB2	OK	35.7718	10.9002	-1.71446	-1.92762	0.00045	0.0174744	yes
ENSDARG00000002215	rtca	20.692	35.721	41.5421	14.0481	12.2725	3.42021	ENSDARG00000002215	rtca	22:16282143-16291041	EGFP	SATB2	OK	32.6517	9.91358	-1.71968	-1.87687	0.0005	0.0187099	yes
ENSDARG00000010021	grpel1	32.3971	58.4209	28.9278	7.81496	16.2701	12.2177	ENSDARG00000010021	grpel1	7:39744243-39751540	EGFP	SATB2	OK	39.9152	12.1009	-1.72183	-1.80163	0.0016	0.0402471	yes
ENSDARG00000008447	fkbp4	99.6135	38.7747	97.8202	7.20684	35.2181	29.0044	ENSDARG00000008447	fkbp4	18:6536292-6550378	EGFP	SATB2	OK	78.7361	23.8098	-1.72547	-1.97391	0.0007	0.0235823	yes
ENSDARG00000056228	pld1a	41.9356	32.1414	94.6721	19.7183	21.0635	10.1055	ENSDARG00000056228	pld1a	2:25560555-25632090	EGFP	SATB2	OK	56.2497	16.9624	-1.7295	-1.93453	0.0021	0.047685	yes
ENSDARG00000040864	si:dkey-286j15.1	19.3465	53.2628	23.0572	4.88081	17.1135	6.80232	ENSDARG00000040864	si:dkey-286j15.1	22:30009925-30033583	EGFP	SATB2	OK	31.8888	9.59888	-1.73211	-1.89665	0.0009	0.0279878	yes
ENSDARG00000103417	si:dkey-269o24.6	38.2723	25.0907	24.1568	11.8329	8.87882	5.61384	ENSDARG00000103417	si:dkey-269o24.6	4:56889551-56898328	EGFP	SATB2	OK	29.1733	8.77519	-1.73314	-2.11113	0.0004	0.0162871	yes
ENSDARG00000013072	mmp15b	36.745	89.4884	30.1228	16.2027	19.6456	11.1175	ENSDARG00000013072	mmp15b	2:28453337-28521429	EGFP	SATB2	OK	52.1187	15.6553	-1.73515	-2.14419	0.0005	0.0187099	yes
ENSDARG00000102406	si:ch211-165e15.1	30.8529	24.2372	75.0795	19.1324	15.8475	4.11934	ENSDARG00000102406	si:ch211-165e15.1	13:1430093-1534879	EGFP	SATB2	OK	43.3899	13.0331	-1.73518	-1.86779	0.0009	0.0279878	yes
ENSDARG00000027887	zfyve21	54.359	13.5643	46.72	9.10879	18.9863	6.11783	ENSDARG00000027887	zfyve21	13:43639866-43659541	EGFP	SATB2	OK	38.2144	11.4043	-1.74454	-1.81599	0.00125	0.0343431	yes
ENSDARG00000017489	zgc:123068	40.0568	42.4595	121.844	19.3717	33.0162	8.502	ENSDARG00000017489	zgc:123068	13:37605895-37608441	EGFP	SATB2	OK	68.12	20.2966	-1.74684	-1.84833	0.0022	0.0487814	yes
ENSDARG00000113678	BX511082.1	9.32709	72.9713	32.7431	14.2836	9.59406	10.2703	ENSDARG00000113678	BX511082.1	9:14291931-14297132	EGFP	SATB2	OK	38.3472	11.3827	-1.75228	-2.00543	0.0013	0.0349533	yes
ENSDARG00000001241	puf60b	158.841	101.24	80.508	17.377	38.694	44.9384	ENSDARG00000001241	puf60b	7:41146559-41158143	EGFP	SATB2	OK	113.529	33.6698	-1.75354	-1.70108	0.001	0.029749	yes
ENSDARG00000043416	tnfaip2a	34.6129	78.8434	42.071	22.6803	11.6978	11.7089	ENSDARG00000043416	tnfaip2a	20:18661623-18685352	EGFP	SATB2	OK	51.8424	15.3623	-1.75474	-1.52609	0.0009	0.0279878	yes
ENSDARG00000013031	mta2	70.8873	93.191	42.8286	13.5873	20.7626	26.6331	ENSDARG00000013031	mta2	7:17907882-17944488	EGFP	SATB2	OK	68.969	20.3276	-1.7625	-1.27812	0.0013	0.0349533	yes
ENSDARG00000008030	myl9b	8.6546	23.1815	17.8681	7.95702	3.30923	3.35322	ENSDARG00000008030	myl9b	6:1787159-1799561	EGFP	SATB2	OK	16.5681	4.87316	-1.76548	-1.91652	0.00095	0.0289462	yes
ENSDARG00000111648	hist1h2a3	481.21	178.122	68.236	89.7893	54.4127	66.9502	ENSDARG00000111648	hist1h2a3	25:35064641-35065028	EGFP	SATB2	OK	242.523	70.3841	-1.7848	-1.97362	0.0014	0.0366412	yes
ENSDARG00000007813	rnpepl1	20.7692	5.61164	38.211	4.70522	9.14297	4.89216	ENSDARG00000007813	rnpepl1	18:45862413-45887894	EGFP	SATB2	OK	21.5306	6.24678	-1.7852	-2.18352	0.00075	0.0247511	yes
ENSDARG00000044183	prkab1a	14.1808	17.3307	23.9902	3.92069	3.74669	8.42751	ENSDARG00000044183	prkab1a	10:17936440-17946163	EGFP	SATB2	OK	18.5006	5.36496	-1.78593	-1.95423	0.00195	0.0457472	yes
ENSDARG00000070227	nhsa	5.18265	5.14384	19.3818	1.48978	3.06512	4.0582	ENSDARG00000070227	nhsa	23:41200853-41229194	EGFP	SATB2	OK	9.90278	2.87103	-1.78626	-1.8753	0.00175	0.0430633	yes
ENSDARG00000111247	hist1h4l	1028.05	326.413	174.907	139.703	113.123	189.318	ENSDARG00000111247	hist1h4l	25:35137079-35137391	EGFP	SATB2	OK	509.79	147.381	-1.79035	-1.95347	0.0012	0.0334155	yes
ENSDARG00000101240	CU651662.1	157.359	347.018	166.269	98.1514	56.9795	38.7121	ENSDARG00000101240	CU651662.1	7:71494245-71501970	EGFP	SATB2	OK	223.549	64.6143	-1.79066	-2.13281	5e-05	0.00325273	yes
ENSDARG00000102056	si:dkeyp-94b4.1	39.5694	20.9328	24.9753	14.2278	6.36811	4.04491	ENSDARG00000102056	si:dkeyp-94b4.1	12:15690362-15823532	EGFP	SATB2	OK	28.4925	8.2136	-1.79449	-1.92761	0.00095	0.0289462	yes
ENSDARG00000024785	ctnna2	19.2511	11.8684	31.3934	5.94076	6.87975	5.17391	ENSDARG00000024785	ctnna2	1:42224768-43039672	EGFP	SATB2	OK	20.8376	5.99814	-1.7966	-2.11963	0.0001	0.00571692	yes
ENSDARG00000075954	serpinh1a	32.0542	48.2754	86.0505	19.5577	19.9348	8.34733	ENSDARG00000075954	serpinh1a	10:38512260-38544426	EGFP	SATB2	OK	55.46	15.9466	-1.7982	-2.15675	0.0002	0.00939378	yes
ENSDARG00000070670	crip2	26.3367	7.59833	45.1426	4.00174	12.4918	5.96489	ENSDARG00000070670	crip2	17:37445524-37474689	EGFP	SATB2	OK	26.3592	7.48613	-1.81601	-2.00053	0.00045	0.0174744	yes
ENSDARG00000078865	cxxc5a	69.6933	39.2094	50.0155	10.9979	19.9148	14.1571	ENSDARG00000078865	cxxc5a	21:28863120-28920245	EGFP	SATB2	OK	52.9727	15.0233	-1.81805	-2.1585	0.0005	0.0187099	yes
ENSDARG00000018179	acvrl1	49.7959	3.834	17.5847	6.26696	8.1606	5.6898	ENSDARG00000018179	acvrl1	23:27835646-27857104	EGFP	SATB2	OK	23.7382	6.70578	-1.82373	-2.06275	0.0008	0.0257994	yes
ENSDARG00000099771	gne	19.9808	16.1686	37.4505	10.8415	3.13806	6.75098	ENSDARG00000099771	gne	1:12295141-12334540	EGFP	SATB2	OK	24.5333	6.91019	-1.82794	-1.67115	0.00075	0.0247511	yes
ENSDARG00000056929	kdm6bb	11.3084	3.92737	4.76088	2.03396	2.14263	1.45063	ENSDARG00000056929	kdm6bb	10:22724058-22760659	EGFP	SATB2	OK	6.66556	1.87574	-1.82927	-2.23111	0.00015	0.00775308	yes
ENSDARG00000110035	hist1h4l	1108.51	347.578	211.645	66.9475	216.543	185.156	ENSDARG00000110035	hist1h4l	25:35143048-35143360	EGFP	SATB2	OK	555.912	156.216	-1.83132	-1.96466	0.0015	0.0385892	yes
ENSDARG00000057114	hpf1	13.3239	5.1512	13.8225	3.74763	2.16041	3.16763	ENSDARG00000057114	hpf1	1:14020444-14026780	EGFP	SATB2	OK	10.7659	3.02523	-1.83135	-1.9667	0.00225	0.0491677	yes
ENSDARG00000058454	dynll1	213.909	121.781	232.055	46.2139	68.5157	44.8006	ENSDARG00000058454	dynll1	8:2487249-2491471	EGFP	SATB2	OK	189.249	53.1767	-1.83142	-2.22699	5e-05	0.00325273	yes
ENSDARG00000060041	lig1	9.15409	6.64543	8.48162	1.31949	4.05234	1.43563	ENSDARG00000060041	lig1	2:44301275-44344321	EGFP	SATB2	OK	8.09371	2.26915	-1.83465	-2.04545	0.00085	0.0269135	yes
ENSDARG00000090194	lamtor5	69.9574	26.3441	76.4097	9.16142	16.4576	22.7628	ENSDARG00000090194	lamtor5	8:24714732-24744290	EGFP	SATB2	OK	57.5704	16.1273	-1.83582	-2.16434	0.00095	0.0289462	yes
ENSDARG00000044299	lmnb1	51.5098	49.0254	51.6564	15.4863	16.2739	10.8415	ENSDARG00000044299	lmnb1	10:16036245-16056908	EGFP	SATB2	OK	50.7305	14.2005	-1.83691	-2.06581	5e-05	0.00325273	yes
ENSDARG00000004621	gpm6ab	251.435	66.5804	347.514	78.007	46.348	61.9335	ENSDARG00000004621	gpm6ab	1:38649140-38756904	EGFP	SATB2	OK	221.843	62.0962	-1.83696	-2.06549	0.00025	0.0112297	yes
ENSDARG00000003041	CABZ01111496.1	22.0014	277.07	87.5007	38.2779	43.5676	26.173	ENSDARG00000003041	CABZ01111496.1	20:54174977-54192130	EGFP	SATB2	OK	128.857	36.0062	-1.83946	-2.50927	0.0003	0.0130109	yes
ENSDARG00000019507	mcm5	16.3166	23.4081	50.8123	5.53699	15.2372	4.48189	ENSDARG00000019507	mcm5	3:25999476-26011440	EGFP	SATB2	OK	30.179	8.4187	-1.84187	-2.08745	0.00035	0.0147006	yes
ENSDARG00000058221	ugcg	39.5983	189.077	244.125	39.7197	38.1107	53.3349	ENSDARG00000058221	ugcg	10:11038191-11094127	EGFP	SATB2	OK	157.6	43.7218	-1.84984	-2.09681	0.0006	0.021125	yes
ENSDARG00000103032	rap2b	123.186	45.2454	123.024	22.1899	35.5497	22.8796	ENSDARG00000103032	rap2b	18:50536201-50766660	EGFP	SATB2	OK	97.1516	26.8731	-1.85408	-1.87706	0.0018	0.0435831	yes
ENSDARG00000061385	haus3	15.1677	7.302	5.00843	1.68098	3.81823	2.0827	ENSDARG00000061385	haus3	7:24390938-24453754	EGFP	SATB2	OK	9.15939	2.5273	-1.85765	-1.87236	0.00225	0.0491677	yes
ENSDARG00000013561	pgm1	24.9392	21.1636	44.427	8.89315	6.88802	9.06743	ENSDARG00000013561	pgm1	6:32010182-32025225	EGFP	SATB2	OK	30.1766	8.28287	-1.86523	-2.27637	0.00015	0.00775308	yes
ENSDARG00000074381	farp1	50.7226	15.9773	72.5354	18.9112	6.55065	12.7418	ENSDARG00000074381	farp1	1:2301957-2444210	EGFP	SATB2	OK	46.4118	12.7346	-1.86574	-1.17975	0.00035	0.0147006	yes
ENSDARG00000098591	tubb2b	240.731	99.8509	162.504	34.5094	63.2448	40.1592	ENSDARG00000098591	tubb2b	8:52701810-52716316	EGFP	SATB2	OK	167.696	45.9711	-1.86704	-2.13498	0.0002	0.00939378	yes
ENSDARG00000075482	zgc:173587	77.931	14.6103	25.4209	8.63067	11.7982	11.9077	ENSDARG00000075482	zgc:173587	7:73827804-73829243	EGFP	SATB2	OK	39.3207	10.7788	-1.86709	-2.10693	0.00025	0.0112297	yes
ENSDARG00000114711	BX324142.1	6.56506	17.7878	12.2948	3.78301	2.64804	3.61209	ENSDARG00000114711	BX324142.1	4:47636302-47645808	EGFP	SATB2	OK	12.2159	3.34771	-1.86751	-1.97056	0.0003	0.0130109	yes
ENSDARG00000114895	si:ch211-113a14.22	524.113	194.082	91.4772	52.7069	66.7051	101.551	ENSDARG00000114895	si:ch211-113a14.22	25:36347125-36347500	EGFP	SATB2	OK	269.891	73.6542	-1.87354	-1.97845	0.00115	0.0323817	yes
ENSDARG00000111619	hist1h4l	2747.49	869.906	655.6	213.761	582.861	369.485	ENSDARG00000111619	hist1h4l	7:73852282-73852594	EGFP	SATB2	OK	1424.33	388.702	-1.87355	-2.08943	0.00055	0.0199223	yes
ENSDARG00000041394	dnajb1b	94.0062	13.8685	43.9464	6.84371	13.0827	21.454	ENSDARG00000041394	dnajb1b	1:55730204-55750208	EGFP	SATB2	OK	50.6071	13.7935	-1.87535	-1.88748	0.0013	0.0349533	yes
ENSDARG00000005593	rxrga	40.4141	13.7225	31.2177	11.2841	7.20857	4.77124	ENSDARG00000005593	rxrga	2:20725683-20788698	EGFP	SATB2	OK	28.4514	7.75465	-1.87537	-2.08932	0.0002	0.00939378	yes
ENSDARG00000017744	smc2	27.7879	11.1752	12.8179	4.11171	5.03494	4.89724	ENSDARG00000017744	smc2	1:19535119-19561801	EGFP	SATB2	OK	17.2603	4.68129	-1.88248	-2.08548	5e-05	0.00325273	yes
ENSDARG00000069013	prdx4	35.2562	21.7616	42.5503	8.47493	10.9714	7.46122	ENSDARG00000069013	prdx4	5:4298635-4318689	EGFP	SATB2	OK	33.1894	8.96917	-1.88767	-2.17285	0.0003	0.0130109	yes
ENSDARG00000094577	cdc42se2	10.3468	10.5144	12.2537	3.3614	3.35607	2.22339	ENSDARG00000094577	cdc42se2	10:5159474-5221537	EGFP	SATB2	OK	11.0383	2.98028	-1.889	-1.9588	0.0016	0.0402471	yes
ENSDARG00000077769	cited1	108.027	122.578	102.332	12.2455	48.3068	29.3251	ENSDARG00000077769	cited1	7:51642670-51648749	EGFP	SATB2	OK	110.979	29.9591	-1.88922	-2.2037	0.0002	0.00939378	yes
ENSDARG00000036754	hmgn3	26.2228	25.252	47.8293	7.49831	10.2107	9.09323	ENSDARG00000036754	hmgn3	23:31358087-31372807	EGFP	SATB2	OK	33.1014	8.93409	-1.8895	-1.89299	0.00175	0.0430633	yes
ENSDARG00000058806	naxe	22.8072	17.6554	16.6022	4.15588	5.4842	5.75658	ENSDARG00000058806	naxe	19:7408234-7412647	EGFP	SATB2	OK	19.0216	5.13222	-1.88999	-2.02055	0.00155	0.0394718	yes
ENSDARG00000070297	CR354435.1	237.967	61.7921	34.436	23.8529	28.7064	37.2826	ENSDARG00000070297	CR354435.1	25:36369920-36370292	EGFP	SATB2	OK	111.398	29.9473	-1.89523	-1.97435	0.0009	0.0279878	yes
ENSDARG00000016855	sf3b5	71.1361	37.8213	52.8245	10.8065	19.2141	13.4635	ENSDARG00000016855	sf3b5	13:23897974-23901732	EGFP	SATB2	OK	53.9273	14.4947	-1.89549	-2.02436	0.0012	0.0334155	yes
ENSDARG00000087693	atox1	139.442	68.9097	91.3565	24.6408	31.1332	24.7722	ENSDARG00000087693	atox1	14:25982961-25985762	EGFP	SATB2	OK	99.9029	26.8487	-1.89567	-2.13323	0.00045	0.0174744	yes
ENSDARG00000042533	gstm.1	116.848	32.1505	121.288	29.0361	19.6867	23.7318	ENSDARG00000042533	gstm.1	8:25295159-25297928	EGFP	SATB2	OK	90.0955	24.1515	-1.89934	-2.43336	0.0002	0.00939378	yes
ENSDARG00000043713	asf1bb	13.8752	9.46829	16.0433	2.06504	3.70813	4.74667	ENSDARG00000043713	asf1bb	1:55878112-55888970	EGFP	SATB2	OK	13.1289	3.50661	-1.9046	-2.07145	0.00095	0.0289462	yes
ENSDARG00000095819	si:dkey-231j24.3	19.0538	8.30772	13.7238	3.76349	2.36525	4.84409	ENSDARG00000095819	si:dkey-231j24.3	2:16365767-16380283	EGFP	SATB2	OK	13.6951	3.65761	-1.90469	-2.24143	0.0002	0.00939378	yes
ENSDARG00000078088	si:ch211-186j3.6	0.478176	1.63292	1.98195	0.825438	0.12642	0.139961	ENSDARG00000078088	si:ch211-186j3.6	7:47417528-47850702	EGFP	SATB2	OK	1.36435	0.36394	-1.90644	-1.75006	0.0019	0.0448531	yes
ENSDARG00000007751	lmnl3	4.10467	17.376	14.0116	2.57618	3.64327	3.24632	ENSDARG00000007751	lmnl3	23:45845158-45860097	EGFP	SATB2	OK	11.8308	3.15525	-1.90672	-2.28526	0.0004	0.0162871	yes
ENSDARG00000007989	nedd8	97.5045	87.4228	53.831	7.09223	32.8241	23.7373	ENSDARG00000007989	nedd8	7:24205033-24207788	EGFP	SATB2	OK	79.5861	21.2179	-1.90724	-2.08834	0.00135	0.0357458	yes
ENSDARG00000077372	tfr1b	314.645	305.705	46.8162	71.9713	76.4366	29.4138	ENSDARG00000077372	tfr1b	24:26005628-26031204	EGFP	SATB2	OK	222.389	59.2739	-1.90762	-1.85721	0.00135	0.0357458	yes
ENSDARG00000040874	add3a	93.2434	162.923	247.504	70.9112	35.5569	27.398	ENSDARG00000040874	add3a	22:30046364-30270469	EGFP	SATB2	OK	167.89	44.622	-1.91169	-1.42278	0.0002	0.00939378	yes
ENSDARG00000045802	hapln3	21.3032	9.76934	6.75227	4.47113	2.53519	2.98478	ENSDARG00000045802	hapln3	25:19201230-19205875	EGFP	SATB2	OK	12.6083	3.33037	-1.92062	-1.98898	0.00095	0.0289462	yes
ENSDARG00000094695	si:dkey-204f11.64	163.418	66.7514	561.865	63.9943	98.2387	46.8702	ENSDARG00000094695	si:dkey-204f11.64	3:34140506-34147100	EGFP	SATB2	OK	264.012	69.7011	-1.92135	-2.3304	0.0006	0.021125	yes
ENSDARG00000098405	map3k1	58.3609	23.2431	85.4948	22.7294	8.75453	12.589	ENSDARG00000098405	map3k1	10:5954786-6004863	EGFP	SATB2	OK	55.6996	14.691	-1.92274	-2.0565	0.00045	0.0174744	yes
ENSDARG00000006434	polr1e	17.4312	16.3668	16.4158	3.86719	2.95176	6.40514	ENSDARG00000006434	polr1e	1:19637311-19648227	EGFP	SATB2	OK	16.738	4.40803	-1.92492	-1.91531	0.0016	0.0402471	yes
ENSDARG00000042270	arsa	9.15172	5.69656	13.1606	2.4129	2.50255	2.43917	ENSDARG00000042270	arsa	18:8231137-8243538	EGFP	SATB2	OK	9.33628	2.45154	-1.92916	-1.97715	0.00145	0.0374305	yes
ENSDARG00000079463	man2b2	21.5504	20.498	16.4215	3.47515	6.13276	5.70716	ENSDARG00000079463	man2b2	7:19509887-19526721	EGFP	SATB2	OK	19.49	5.10503	-1.93274	-2.43014	5e-05	0.00325273	yes
ENSDARG00000088439	gm2a	81.181	33.0748	112.552	19.2746	16.5193	23.5948	ENSDARG00000088439	gm2a	14:26224540-26227970	EGFP	SATB2	OK	75.6024	19.7962	-1.93321	-2.37472	5e-05	0.00325273	yes
ENSDARG00000102798	mcm2	9.70888	22.1081	33.4479	3.14445	10.5566	3.23252	ENSDARG00000102798	mcm2	22:5632028-5655680	EGFP	SATB2	OK	21.7549	5.64454	-1.94642	-2.16628	0.00015	0.00775308	yes
ENSDARG00000040606	tfap2c	103.873	33.9641	181.654	40.5407	25.6492	16.6606	ENSDARG00000040606	tfap2c	6:56141851-56179707	EGFP	SATB2	OK	106.497	27.6169	-1.94719	-2.2213	0.0004	0.0162871	yes
ENSDARG00000078142	SPAG9	107.582	110.658	157.899	48.9722	30.2679	18.1595	ENSDARG00000078142	SPAG9	12:899222-961014	EGFP	SATB2	OK	125.38	32.4665	-1.94928	-1.96258	0.00105	0.0306722	yes
ENSDARG00000034093	dclk2a	38.5731	15.7094	35.3592	17.8033	3.59136	1.78277	ENSDARG00000034093	dclk2a	1:37195464-37310490	EGFP	SATB2	OK	29.8805	7.72581	-1.95145	-1.2515	0.0021	0.047685	yes
ENSDARG00000113481	si:ch211-113a14.19	632.495	147.545	84.8899	58.091	121.431	44.0652	ENSDARG00000113481	si:ch211-113a14.19	25:35140359-35140746	EGFP	SATB2	OK	288.31	74.5291	-1.95175	-2.07604	0.00055	0.0199223	yes
ENSDARG00000061848	col15a1b	16.87	0.247843	12.4324	1.68564	1.35487	4.57583	ENSDARG00000061848	col15a1b	2:23936953-24022085	EGFP	SATB2	OK	9.85006	2.53878	-1.956	-1.94519	0.00085	0.0269135	yes
ENSDARG00000009087	cd74a	167.74	139.429	772.824	94.0131	81.8694	101.976	ENSDARG00000009087	cd74a	14:3038472-3052361	EGFP	SATB2	OK	359.998	92.6196	-1.9586	-1.56987	0.0019	0.0448531	yes
ENSDARG00000024746	hsp90aa1.2	29.1392	46.7927	44.5292	2.08968	22.2112	6.68445	ENSDARG00000024746	hsp90aa1.2	20:53967349-53981626	EGFP	SATB2	OK	40.1537	10.3284	-1.95891	-1.96355	0.00015	0.00775308	yes
ENSDARG00000114169	HIST2H3C (1 of many)	202.011	50.5863	26.0346	16.5428	29.8947	25.0998	ENSDARG00000114169	HIST2H3C (1 of many)	25:36312458-36312869	EGFP	SATB2	OK	92.8773	23.8458	-1.96159	-1.90065	0.0011	0.0317639	yes
ENSDARG00000062711	gal3st1a	12.5269	10.7726	45.1731	13.9097	3.41242	0.20739	ENSDARG00000062711	gal3st1a	5:12888259-12906542	EGFP	SATB2	OK	22.8242	5.84316	-1.96574	-1.93095	0.00145	0.0374305	yes
ENSDARG00000033285	gsto2	66.5251	5.06371	34.7656	4.39186	14.2111	8.52508	ENSDARG00000033285	gsto2	13:25396895-25402772	EGFP	SATB2	OK	35.4515	9.04268	-1.97102	-2.11983	0.0013	0.0349533	yes
ENSDARG00000052497	zgc:110789	179.67	41.2501	125.671	16.5079	42.6627	29.1613	ENSDARG00000052497	zgc:110789	18:12034984-12052132	EGFP	SATB2	OK	115.531	29.444	-1.97223	-2.38191	0.0001	0.00571692	yes
ENSDARG00000057738	hells	6.00554	4.56456	8.09496	1.29314	2.59004	0.871774	ENSDARG00000057738	hells	13:8255105-8270718	EGFP	SATB2	OK	6.22169	1.58499	-1.97284	-2.11437	0.0004	0.0162871	yes
ENSDARG00000061690	nxpe3	76.467	67.2747	55.7811	22.6212	16.5039	11.6944	ENSDARG00000061690	nxpe3	9:34230066-34243967	EGFP	SATB2	OK	66.5076	16.9398	-1.9731	-1.93898	5e-05	0.00325273	yes
ENSDARG00000074056	kctd1	37.2362	25.6377	38.5242	9.43283	9.13715	7.23263	ENSDARG00000074056	kctd1	20:18209894-18256959	EGFP	SATB2	OK	33.7994	8.60087	-1.97444	-2.34402	0.0001	0.00571692	yes
ENSDARG00000086591	si:ch211-113a14.11	40.3562	16.1992	10.2562	3.967	6.08682	6.91792	ENSDARG00000086591	si:ch211-113a14.11	25:36316279-36322775	EGFP	SATB2	OK	22.2705	5.65725	-1.97696	-1.92395	0.0011	0.0317639	yes
ENSDARG00000068572	slc16a1b	76.6126	40.7894	90.4927	32.9682	10.2866	9.52937	ENSDARG00000068572	slc16a1b	8:26923612-26961779	EGFP	SATB2	OK	69.2982	17.5947	-1.97767	-2.33801	0.00015	0.00775308	yes
ENSDARG00000074490	casc4	66.138	24.8479	44.2116	6.27468	15.2543	12.7375	ENSDARG00000074490	casc4	7:31339128-31367917	EGFP	SATB2	OK	45.0658	11.4222	-1.9802	-2.44348	0.0001	0.00571692	yes
ENSDARG00000040224	krcp	10.1851	5.95226	5.76358	1.10974	2.82312	1.59653	ENSDARG00000040224	krcp	7:24881679-24888634	EGFP	SATB2	OK	7.30032	1.84313	-1.9858	-2.08591	0.0005	0.0187099	yes
ENSDARG00000089039	zgc:173585	318.99	148.185	68.8573	48.4623	27.7705	58.6213	ENSDARG00000089039	zgc:173585	25:35135675-35136267	EGFP	SATB2	OK	178.677	44.9514	-1.99092	-2.18279	0.0005	0.0187099	yes
ENSDARG00000115281	hist1h4l	1044.19	416.976	197.521	28.6764	213.016	174.729	ENSDARG00000115281	hist1h4l	25:35107479-35107791	EGFP	SATB2	OK	552.896	138.807	-1.99393	-2.11464	0.00105	0.0306722	yes
ENSDARG00000010085	p4ha2	31.0408	17.4795	11.1445	5.6317	5.15138	4.16287	ENSDARG00000010085	p4ha2	21:43097797-43131752	EGFP	SATB2	OK	19.8883	4.98198	-1.99713	-2.31675	0.00015	0.00775308	yes
ENSDARG00000042214	tmem243a	114.654	41.6159	99.6532	5.09798	30.3019	28.669	ENSDARG00000042214	tmem243a	18:8912112-8916000	EGFP	SATB2	OK	85.3077	21.3563	-1.99801	-2.24265	0.001	0.029749	yes
ENSDARG00000062025	cpox	24.298	8.35731	16.4846	3.8041	4.95101	3.42408	ENSDARG00000062025	cpox	8:18601251-18613948	EGFP	SATB2	OK	16.38	4.05973	-2.01248	-2.35232	5e-05	0.00325273	yes
ENSDARG00000018178	pgm2	24.686	12.5786	50.6928	9.74138	5.6354	6.39807	ENSDARG00000018178	pgm2	1:18779167-18803919	EGFP	SATB2	OK	29.3191	7.25828	-2.01414	-2.50932	5e-05	0.00325273	yes
ENSDARG00000040265	mpdu1b	36.2966	32.8283	19.8072	6.36616	9.8663	5.76867	ENSDARG00000040265	mpdu1b	7:26459359-26473483	EGFP	SATB2	OK	29.644	7.33371	-2.01512	-2.07527	0.00045	0.0174744	yes
ENSDARG00000110909	zgc:173552	380.763	177.33	84.0273	30.1002	71.7454	56.8521	ENSDARG00000110909	zgc:173552	7:73845325-73845736	EGFP	SATB2	OK	214.04	52.8992	-2.01656	-2.28357	5e-05	0.00325273	yes
ENSDARG00000052625	fkbp1b	16.2433	30.2172	11.3567	2.82073	6.51385	4.91988	ENSDARG00000052625	fkbp1b	20:44464344-44496245	EGFP	SATB2	OK	19.2724	4.75148	-2.02009	-1.97397	0.00055	0.0199223	yes
ENSDARG00000075818	dok2	27.7851	25.6268	49.7647	15.863	4.4049	5.08412	ENSDARG00000075818	dok2	8:42545756-42594484	EGFP	SATB2	OK	34.3922	8.45066	-2.02495	-1.99538	0.0002	0.00939378	yes
ENSDARG00000042069	pebp1	14.5683	11.1147	7.82546	1.75938	3.6468	2.82686	ENSDARG00000042069	pebp1	5:15350953-15357819	EGFP	SATB2	OK	11.1695	2.74435	-2.02503	-2.04561	0.0007	0.0235823	yes
ENSDARG00000043640	cenpn	20.8349	3.35657	6.62947	1.02655	5.01279	1.52219	ENSDARG00000043640	cenpn	18:29898954-29906010	EGFP	SATB2	OK	10.2736	2.52051	-2.02716	-1.8705	0.0021	0.047685	yes
ENSDARG00000028793	nlk2	8.43182	15.7346	29.4789	3.21322	6.26648	3.63575	ENSDARG00000028793	nlk2	15:30157601-30301528	EGFP	SATB2	OK	17.8818	4.37182	-2.03218	-2.25395	0.00015	0.00775308	yes
ENSDARG00000116524	zgc:103700	20.268	0.0691461	33.1596	5.1992	1.90063	5.95779	ENSDARG00000116524	zgc:103700	8:36321335-36327328	EGFP	SATB2	OK	17.8323	4.35254	-2.03456	-2.62675	0.0004	0.0162871	yes
ENSDARG00000012881	slc4a1a	12.3241	18.3683	2.05186	5.46085	1.95433	0.572666	ENSDARG00000012881	slc4a1a	3:20065860-20092124	EGFP	SATB2	OK	10.9148	2.66261	-2.03537	-1.85829	0.0022	0.0487814	yes
ENSDARG00000024109	naa40	16.7101	20.797	13.6668	2.19643	4.66644	5.57816	ENSDARG00000024109	naa40	7:25000059-25011597	EGFP	SATB2	OK	17.058	4.14701	-2.0403	-2.00856	0.0004	0.0162871	yes
ENSDARG00000028327	gmfb	161.628	48.5357	115.689	30.2215	33.9406	15.0068	ENSDARG00000028327	gmfb	13:36585398-36612159	EGFP	SATB2	OK	108.617	26.3897	-2.04121	-2.06586	0.0003	0.0130109	yes
ENSDARG00000074583	grid1a	14.6069	0.724015	1.81039	1.23981	0.894085	2.02159	ENSDARG00000074583	grid1a	17:25955002-26365082	EGFP	SATB2	OK	5.71377	1.38516	-2.04439	-1.72678	0.002	0.0465823	yes
ENSDARG00000063361	si:ch211-1e14.1	35.533	10.1635	53.6542	3.88524	11.901	8.26686	ENSDARG00000063361	si:ch211-1e14.1	18:12364732-12453550	EGFP	SATB2	OK	33.1169	8.01771	-2.04631	-2.20583	0.0012	0.0334155	yes
ENSDARG00000025350	prdx2	509.133	157.111	348.376	68.1073	83.2484	94.2635	ENSDARG00000025350	prdx2	1:51721850-51729862	EGFP	SATB2	OK	338.207	81.873	-2.04645	-2.33058	0.00075	0.0247511	yes
ENSDARG00000115875	si:ch211-113a14.19	946.322	356.937	168.327	63.6985	134.883	156.704	ENSDARG00000115875	si:ch211-113a14.19	7:73846608-73846995	EGFP	SATB2	OK	490.529	118.428	-2.05032	-2.32541	0.00025	0.0112297	yes
ENSDARG00000037363	st5	45.6987	38.0346	51.6699	9.97613	6.99651	15.7164	ENSDARG00000037363	st5	7:28464793-28549535	EGFP	SATB2	OK	45.1344	10.8963	-2.05038	-1.52571	5e-05	0.00325273	yes
ENSDARG00000034773	ncapd3	27.4593	6.43709	9.61586	2.53109	3.69441	4.26315	ENSDARG00000034773	ncapd3	1:21540452-21563040	EGFP	SATB2	OK	14.5041	3.49622	-2.05259	-2.25523	5e-05	0.00325273	yes
ENSDARG00000020795	rac3b	21.8007	11.4971	24.1598	6.45819	5.12897	2.22639	ENSDARG00000020795	rac3b	12:3022881-3042029	EGFP	SATB2	OK	19.1525	4.60451	-2.05641	-2.4917	5e-05	0.00325273	yes
ENSDARG00000061362	fam69ab	15.2343	3.56012	24.3755	1.67623	4.51329	4.17248	ENSDARG00000061362	fam69ab	6:29102941-29143463	EGFP	SATB2	OK	14.39	3.454	-2.05873	-1.92326	0.00125	0.0343431	yes
ENSDARG00000059529	-	5.60855	16.2889	12.2602	0.763838	4.72249	2.70779	ENSDARG00000059529	-	7:56735194-56746338	EGFP	SATB2	OK	11.3859	2.73137	-2.05955	-1.97431	0.00225	0.0491677	yes
ENSDARG00000015003	arhgap4b	30.0773	9.90861	55.5378	6.35355	9.89417	6.66414	ENSDARG00000015003	arhgap4b	23:18615991-18668836	EGFP	SATB2	OK	31.8412	7.63729	-2.05976	-2.25966	0.0002	0.00939378	yes
ENSDARG00000070006	rcn1	16.8818	32.3787	15.7733	5.12514	4.98672	5.4226	ENSDARG00000070006	rcn1	7:15818777-15830251	EGFP	SATB2	OK	21.678	5.17815	-2.06572	-1.81363	0.0022	0.0487814	yes
ENSDARG00000055722	bco2a	8.33642	6.51299	16.0916	2.02605	2.56938	2.79023	ENSDARG00000055722	bco2a	5:30052713-30080332	EGFP	SATB2	OK	10.3137	2.46189	-2.06672	-1.73497	0.00095	0.0289462	yes
ENSDARG00000017229	megf10	182.863	89.2231	175.85	63.0754	21.2578	22.2743	ENSDARG00000017229	megf10	10:16069986-16161040	EGFP	SATB2	OK	149.312	35.5359	-2.07098	-2.02116	0.00015	0.00775308	yes
ENSDARG00000018726	slco3a1	50.9274	10.7403	47.8918	12.1143	10.2388	3.71486	ENSDARG00000018726	slco3a1	18:25073983-25177230	EGFP	SATB2	OK	36.5198	8.6893	-2.07137	-2.23674	0.00025	0.0112297	yes
ENSDARG00000026577	cdk2	25.026	9.15648	16.2221	2.79711	6.024	3.12227	ENSDARG00000026577	cdk2	11:3301276-3308569	EGFP	SATB2	OK	16.8015	3.98113	-2.07735	-2.11903	0.00045	0.0174744	yes
ENSDARG00000061794	jam3b	260.367	104.328	214.621	87.0042	26.4993	23.5345	ENSDARG00000061794	jam3b	21:24984969-25046991	EGFP	SATB2	OK	193.105	45.6793	-2.07977	-2.23687	0.00065	0.0224319	yes
ENSDARG00000063032	dok6	7.52505	5.5954	4.60021	0.357361	2.32065	1.51278	ENSDARG00000063032	dok6	24:14937204-15107330	EGFP	SATB2	OK	5.90689	1.39693	-2.08014	-1.72996	0.00135	0.0357458	yes
ENSDARG00000008858	cyp7b1	8.61963	7.07639	3.74118	2.69576	0.372238	1.51897	ENSDARG00000008858	cyp7b1	2:42135718-42152135	EGFP	SATB2	OK	6.47907	1.52899	-2.08321	-1.88693	0.001	0.029749	yes
ENSDARG00000112375	CR762436.1	263.695	87.2228	51.9458	23.691	28.4651	42.9101	ENSDARG00000112375	CR762436.1	25:35139109-35139520	EGFP	SATB2	OK	134.288	31.6888	-2.08329	-2.16061	0.00045	0.0174744	yes
ENSDARG00000112175	zgc:173552	591.04	147.895	95.8109	40.7549	69.9211	85.0352	ENSDARG00000112175	zgc:173552	7:73854065-73854476	EGFP	SATB2	OK	278.249	65.2371	-2.09261	-2.23812	0.00015	0.00775308	yes
ENSDARG00000019969	smarcd3b	38.2328	11.3122	12.2592	2.3494	8.18842	3.94435	ENSDARG00000019969	smarcd3b	7:41436487-41489997	EGFP	SATB2	OK	20.6014	4.82739	-2.09343	-1.85552	5e-05	0.00325273	yes
ENSDARG00000091813	si:dkey-21a6.5	293.039	98.8185	417.703	41.492	106.685	40.5384	ENSDARG00000091813	si:dkey-21a6.5	17:43519289-43533095	EGFP	SATB2	OK	269.854	62.9051	-2.10093	-2.18675	0.0002	0.00939378	yes
ENSDARG00000096365	si:ch211-195m9.3	53.8575	30.5435	7.55364	5.46967	7.8899	7.90089	ENSDARG00000096365	si:ch211-195m9.3	18:35128684-35148310	EGFP	SATB2	OK	30.6516	7.08682	-2.11275	-2.0747	0.00075	0.0247511	yes
ENSDARG00000101644	ARHGEF17	11.4671	1.37173	23.8396	2.37818	4.04466	2.05267	ENSDARG00000101644	ARHGEF17	18:2681240-2727764	EGFP	SATB2	OK	12.2261	2.82517	-2.11356	-2.13575	0.0003	0.0130109	yes
ENSDARG00000033273	primpol	32.0101	5.62676	6.61588	2.67189	2.21061	5.33209	ENSDARG00000033273	primpol	1:21563310-21573013	EGFP	SATB2	OK	14.7509	3.40486	-2.11513	-1.83288	0.001	0.029749	yes
ENSDARG00000109926	si:ch211-113a14.19	1538.17	533.54	325.699	98.8787	185.688	268.804	ENSDARG00000109926	si:ch211-113a14.19	7:73855686-73856073	EGFP	SATB2	OK	799.137	184.457	-2.11516	-2.3263	5e-05	0.00325273	yes
ENSDARG00000100514	cfap20	50.3333	26.4841	20.2235	2.76777	6.68421	12.8683	ENSDARG00000100514	cfap20	19:1393359-1405363	EGFP	SATB2	OK	32.347	7.44008	-2.12024	-2.00517	0.002	0.0465823	yes
ENSDARG00000103071	si:ch211-244c8.4	12.5361	9.89275	26.013	4.49715	2.82631	3.80032	ENSDARG00000103071	si:ch211-244c8.4	10:35537973-35542071	EGFP	SATB2	OK	16.1473	3.70793	-2.12261	-2.41794	5e-05	0.00325273	yes
ENSDARG00000071662	si:rp71-36a1.3	19.8336	54.0287	46.938	6.85443	19.7617	1.0907	ENSDARG00000071662	si:rp71-36a1.3	22:5940397-5958066	EGFP	SATB2	OK	40.2668	9.2356	-2.12431	-1.97967	0.0019	0.0448531	yes
ENSDARG00000074379	knstrn	29.934	8.53083	14.2659	1.886	5.22593	4.85779	ENSDARG00000074379	knstrn	1:11107687-11117930	EGFP	SATB2	OK	17.5769	3.98991	-2.13926	-2.23289	0.0003	0.0130109	yes
ENSDARG00000101135	si:dkey-85k7.7	56.6253	1.21734	6.57699	7.44357	2.78302	4.3775	ENSDARG00000101135	si:dkey-85k7.7	7:21859336-21874346	EGFP	SATB2	OK	21.4732	4.86803	-2.14113	-2.13536	0.0008	0.0257994	yes
ENSDARG00000116483	FP102122.1	89.3226	102.1	166.963	18.4775	31.1841	30.9508	ENSDARG00000116483	FP102122.1	13:50670743-50672341	EGFP	SATB2	OK	119.462	26.8708	-2.15244	-2.29181	0.0003	0.0130109	yes
ENSDARG00000010192	pax3a	119.34	83.6547	69.2555	44.407	11.6456	4.95289	ENSDARG00000010192	pax3a	2:47370322-47431205	EGFP	SATB2	OK	90.7501	20.3352	-2.15792	-2.30353	0.00055	0.0199223	yes
ENSDARG00000042894	tyms	45.2417	20.0691	19.6373	1.93374	11.8067	5.25249	ENSDARG00000042894	tyms	7:71535044-71541329	EGFP	SATB2	OK	28.3161	6.33098	-2.16112	-2.31282	0.00015	0.00775308	yes
ENSDARG00000053713	ccdc88c	9.53722	0.544352	8.13631	2.09694	1.19194	0.703212	ENSDARG00000053713	ccdc88c	17:38602601-38716245	EGFP	SATB2	OK	6.07263	1.3307	-2.19014	-2.37231	5e-05	0.00325273	yes
ENSDARG00000073696	frmd8	320.926	75.7325	155.806	48.5617	26.9142	45.3008	ENSDARG00000073696	frmd8	10:26944417-26961209	EGFP	SATB2	OK	184.155	40.2589	-2.19354	-2.33119	0.00045	0.0174744	yes
ENSDARG00000058292	sephs1	21.8984	8.17417	13.0187	1.12723	5.22118	3.02454	ENSDARG00000058292	sephs1	18:8367601-8380120	EGFP	SATB2	OK	14.3638	3.12432	-2.20082	-2.23035	0.0002	0.00939378	yes
ENSDARG00000091905	si:dkey-108k21.21	56.0571	55.5126	12.4166	6.46709	12.0507	8.43448	ENSDARG00000091905	si:dkey-108k21.21	25:35103412-35104129	EGFP	SATB2	OK	41.3288	8.98409	-2.2017	-2.58798	0.00015	0.00775308	yes
ENSDARG00000067520	zgc:158482	18.2858	23.2374	30.2614	1.24861	9.16218	5.15988	ENSDARG00000067520	zgc:158482	18:54353-60885	EGFP	SATB2	OK	23.9282	5.19022	-2.20484	-2.50557	0.0001	0.00571692	yes
ENSDARG00000002304	gins2	16.8836	4.94387	9.68763	1.02839	3.85468	1.93928	ENSDARG00000002304	gins2	18:30481029-30499489	EGFP	SATB2	OK	10.505	2.27412	-2.2077	-1.89896	0.00175	0.0430633	yes
ENSDARG00000104710	psip1a	10.2898	3.60526	8.0957	1.77908	1.09024	1.87739	ENSDARG00000104710	psip1a	1:28089702-28195267	EGFP	SATB2	OK	7.33026	1.58224	-2.2119	-2.10943	0.00185	0.0443197	yes
ENSDARG00000058082	birc7	75.441	98.282	229.78	37.2221	32.773	17.0159	ENSDARG00000058082	birc7	23:14217507-14230506	EGFP	SATB2	OK	134.501	29.0037	-2.21331	-2.40165	0.0001	0.00571692	yes
ENSDARG00000101362	mibp	62.8602	70.3712	28.8724	9.34043	19.4331	6.1659	ENSDARG00000101362	mibp	22:5118360-5122557	EGFP	SATB2	OK	54.0346	11.6465	-2.21399	-2.06588	0.001	0.029749	yes
ENSDARG00000052615	tnmd	13.1602	0.599609	12.8089	2.05882	2.89763	0.750625	ENSDARG00000052615	tnmd	14:40641349-40722928	EGFP	SATB2	OK	8.85624	1.90236	-2.21891	-2.17478	0.0008	0.0257994	yes
ENSDARG00000101766	ptmab	168.523	116.801	155.832	38.2094	41.4305	14.8971	ENSDARG00000101766	ptmab	2:5131963-5135125	EGFP	SATB2	OK	147.052	31.5123	-2.22234	-2.70694	5e-05	0.00325273	yes
ENSDARG00000039616	cenpk	38.9889	3.14172	8.10322	4.29383	3.31087	3.15275	ENSDARG00000039616	cenpk	1:31508738-31516112	EGFP	SATB2	OK	16.7446	3.58582	-2.22332	-1.80407	0.0022	0.0487814	yes
ENSDARG00000079712	gal3st4	39.282	20.6375	22.7225	7.49328	7.98869	2.17176	ENSDARG00000079712	gal3st4	7:26393750-26408472	EGFP	SATB2	OK	27.5473	5.88458	-2.2269	-2.62583	5e-05	0.00325273	yes
ENSDARG00000060927	si:ch211-136a13.1	10.4162	14.5311	16.7781	4.88488	2.39257	1.62847	ENSDARG00000060927	si:ch211-136a13.1	18:49225551-49247479	EGFP	SATB2	OK	13.9085	2.96864	-2.22809	-2.65469	5e-05	0.00325273	yes
ENSDARG00000095130	CT583652.1	10.1807	122.5	61.7748	12.7342	16.495	12.2391	ENSDARG00000095130	CT583652.1	20:6581798-6583670	EGFP	SATB2	OK	64.8185	13.8228	-2.22936	-1.80423	0.00085	0.0269135	yes
ENSDARG00000059707	ZNF423	18.751	3.96866	19.6103	3.38136	3.01944	2.60489	ENSDARG00000059707	ZNF423	18:17786547-17997474	EGFP	SATB2	OK	14.11	3.0019	-2.23277	-2.53742	5e-05	0.00325273	yes
ENSDARG00000012199	gpt2	46.4439	25.7181	34.2473	7.41986	7.17872	7.98898	ENSDARG00000012199	gpt2	7:41887428-41901688	EGFP	SATB2	OK	35.4698	7.52919	-2.23602	-2.83504	5e-05	0.00325273	yes
ENSDARG00000016835	tcirg1a	17.2812	2.31886	18.0378	2.00252	2.75344	3.23218	ENSDARG00000016835	tcirg1a	1:44870879-44901163	EGFP	SATB2	OK	12.5459	2.66271	-2.23625	-2.51429	0.0001	0.00571692	yes
ENSDARG00000044246	snx18b	10.6956	1.25207	4.15584	1.84947	0.782122	0.75129	ENSDARG00000044246	snx18b	10:9092814-9097996	EGFP	SATB2	OK	5.36784	1.12763	-2.25105	-2.11087	0.00115	0.0323817	yes
ENSDARG00000056554	rap1gap	9.92958	19.7158	5.9053	2.11817	2.04986	3.29168	ENSDARG00000056554	rap1gap	23:22267373-22425257	EGFP	SATB2	OK	11.8502	2.48657	-2.25269	-2.15094	5e-05	0.00325273	yes
ENSDARG00000099144	igfbp3	27.695	7.79217	29.0426	7.54994	4.09661	1.88346	ENSDARG00000099144	igfbp3	20:6756246-6804237	EGFP	SATB2	OK	21.5099	4.51	-2.2538	-2.32498	5e-05	0.00325273	yes
ENSDARG00000079542	stard13a	34.2404	36.3451	78.1412	18.1209	9.83902	3.17068	ENSDARG00000079542	stard13a	10:34315718-34404768	EGFP	SATB2	OK	49.5756	10.3769	-2.25626	-1.7079	0.0001	0.00571692	yes
ENSDARG00000116988	FP236542.1	129.201	8.40689	218.524	33.9384	21.5223	18.8966	ENSDARG00000116988	FP236542.1	10:42873162-42882215	EGFP	SATB2	OK	118.711	24.7858	-2.25986	-2.69738	0.00075	0.0247511	yes
ENSDARG00000038643	alas2	33.7358	23.3855	0.499033	7.61701	3.41263	0.992686	ENSDARG00000038643	alas2	8:21353877-21372485	EGFP	SATB2	OK	19.2068	4.00744	-2.26086	-2.1553	5e-05	0.00325273	yes
ENSDARG00000057575	pnp4a	30.4274	51.4363	162.613	21.8375	19.0429	10.0837	ENSDARG00000057575	pnp4a	11:24251140-24310645	EGFP	SATB2	OK	81.4922	16.988	-2.26214	-2.66215	5e-05	0.00325273	yes
ENSDARG00000110787	znf1102	19.1431	15.698	18.1973	2.69938	5.03244	3.32395	ENSDARG00000110787	znf1102	4:40295895-40337764	EGFP	SATB2	OK	17.6795	3.68526	-2.26224	-2.23522	0.00075	0.0247511	yes
ENSDARG00000005989	rgl1	361.224	103.237	387.379	80.6064	28.4425	67.6447	ENSDARG00000005989	rgl1	8:19283142-19342111	EGFP	SATB2	OK	283.947	58.8979	-2.26933	-1.65684	0.0008	0.0257994	yes
ENSDARG00000053272	si:dkey-166d12.2	9.42072	1.57008	18.9562	3.56609	1.36213	1.27907	ENSDARG00000053272	si:dkey-166d12.2	6:47869396-47953829	EGFP	SATB2	OK	9.98232	2.0691	-2.27037	-2.24285	0.0003	0.0130109	yes
ENSDARG00000013317	pygmb	24.728	6.83805	10.5008	1.78969	4.25103	2.66679	ENSDARG00000013317	pygmb	7:22823888-22852189	EGFP	SATB2	OK	14.0223	2.9025	-2.27235	-1.72086	0.0001	0.00571692	yes
ENSDARG00000011876	ednraa	109.118	11.6459	48.9221	5.35572	23.718	5.74583	ENSDARG00000011876	ednraa	1:36612659-36702355	EGFP	SATB2	OK	56.5621	11.6065	-2.2849	-1.40171	0.00055	0.0199223	yes
ENSDARG00000042659	thyn1	50.6918	20.0069	3.01299	3.00061	7.83183	4.26455	ENSDARG00000042659	thyn1	15:19331158-19334448	EGFP	SATB2	OK	24.5705	5.03233	-2.28763	-2.29883	0.00015	0.00775308	yes
ENSDARG00000061304	ppp1r9a	10.5622	7.12462	13.4231	3.47126	1.83949	1.04693	ENSDARG00000061304	ppp1r9a	19:41075487-41160943	EGFP	SATB2	OK	10.37	2.11922	-2.2908	-2.09209	5e-05	0.00325273	yes
ENSDARG00000022303	higd1a	247.043	168.232	198.805	48.7835	46.674	29.7584	ENSDARG00000022303	higd1a	2:2168546-2175629	EGFP	SATB2	OK	204.693	41.7386	-2.29401	-2.8283	5e-05	0.00325273	yes
ENSDARG00000098769	slitrk6	6.84736	5.2242	4.67642	1.00616	1.22002	1.15856	ENSDARG00000098769	slitrk6	1:4101740-4154332	EGFP	SATB2	OK	5.58266	1.12825	-2.30687	-2.45326	0.0002	0.00939378	yes
ENSDARG00000070360	inka1a	76.8188	80.8228	31.4801	20.1014	9.60313	8.35406	ENSDARG00000070360	inka1a	11:35048641-35056607	EGFP	SATB2	OK	63.0406	12.6862	-2.31302	-2.69489	5e-05	0.00325273	yes
ENSDARG00000071644	si:dkey-19a16.7	14.9018	20.0605	10.0287	8.18963	0.499708	0.302999	ENSDARG00000071644	si:dkey-19a16.7	22:6487047-6499077	EGFP	SATB2	OK	14.997	2.99744	-2.32287	-1.96643	0.00225	0.0491677	yes
ENSDARG00000026865	fam107b	131.707	36.7092	142.138	29.4876	19.3617	13.0624	ENSDARG00000026865	fam107b	18:12276566-12327478	EGFP	SATB2	OK	103.518	20.6372	-2.32656	-2.32429	0.00015	0.00775308	yes
ENSDARG00000014898	ncbp2	9.38926	24.08	15.5526	2.21997	5.15897	2.29746	ENSDARG00000014898	ncbp2	22:38930724-38934989	EGFP	SATB2	OK	16.3406	3.22547	-2.34088	-2.25459	0.0009	0.0279878	yes
ENSDARG00000041572	zfpm1	1.99996	2.16282	3.28238	0.265171	0.733485	0.464923	ENSDARG00000041572	zfpm1	18:17270426-17399376	EGFP	SATB2	OK	2.48172	0.48786	-2.3468	-2.28884	0.00055	0.0199223	yes
ENSDARG00000039486	bag3	8.47042	3.02277	7.26514	1.08763	0.921613	1.67062	ENSDARG00000039486	bag3	13:25486607-25498661	EGFP	SATB2	OK	6.25278	1.22662	-2.34981	-2.20209	0.0012	0.0334155	yes
ENSDARG00000029856	cnn3b	109.086	49.584	99.4195	16.7658	20.1388	13.5799	ENSDARG00000029856	cnn3b	2:15048409-15075295	EGFP	SATB2	OK	86.0298	16.8282	-2.35395	-2.98077	5e-05	0.00325273	yes
ENSDARG00000061941	trpv4	18.6002	2.09998	23.5384	5.10311	2.65869	0.765533	ENSDARG00000061941	trpv4	5:19795976-19833310	EGFP	SATB2	OK	14.7462	2.84245	-2.37514	-2.46154	5e-05	0.00325273	yes
ENSDARG00000001889	tuba1a	4.90331	16.4283	9.93046	2.04293	2.5498	1.42717	ENSDARG00000001889	tuba1a	23:35708729-35711398	EGFP	SATB2	OK	10.4207	2.00663	-2.3766	-2.22103	0.00155	0.0394718	yes
ENSDARG00000055552	dvl1b	2.44755	2.11391	13.1566	0.661321	0.915419	1.83173	ENSDARG00000055552	dvl1b	11:24360743-24428319	EGFP	SATB2	OK	5.90601	1.13616	-2.37802	-1.93721	0.00145	0.0374305	yes
ENSDARG00000013082	uap1l1	144.449	23.8578	199.893	24.1362	32.3536	14.2014	ENSDARG00000013082	uap1l1	5:31811661-31817395	EGFP	SATB2	OK	122.733	23.5638	-2.38088	-2.39855	5e-05	0.00325273	yes
ENSDARG00000111396	HIST2H3A (1 of many)	701.553	138.4	75.2503	54.9702	61.7389	57.5434	ENSDARG00000111396	HIST2H3A (1 of many)	25:36365566-36365977	EGFP	SATB2	OK	305.068	58.0842	-2.39291	-2.42019	0.0002	0.00939378	yes
ENSDARG00000042953	cyp2n13	0.150408	66.6608	13.3378	6.95207	7.71843	0.581336	ENSDARG00000042953	cyp2n13	20:25515258-25522911	EGFP	SATB2	OK	26.7164	5.08394	-2.3937	-1.98232	0.00025	0.0112297	yes
ENSDARG00000098099	zgc:64065	8.52122	2.73177	22.2871	1.8695	0.946757	3.54408	ENSDARG00000098099	zgc:64065	6:9155251-9161393	EGFP	SATB2	OK	11.18	2.12011	-2.39871	-2.1947	0.0005	0.0187099	yes
ENSDARG00000026166	emilin1b	46.6724	7.52866	114.467	23.8625	7.18096	0.928646	ENSDARG00000026166	emilin1b	17:12439965-12498219	EGFP	SATB2	OK	56.2226	10.6574	-2.3993	-2.179	0.0005	0.0187099	yes
ENSDARG00000082628	RF00003	7.70942	3028.13	579.965	339.196	247.811	97.7934	ENSDARG00000082628	RF00003	10:211781-211947	EGFP	SATB2	OK	1205.27	228.267	-2.40056	-2.23943	0.00115	0.0323817	yes
ENSDARG00000111714	zgc:112271	10.6918	7.42384	5.26542	2.47423	1.21332	0.738292	ENSDARG00000111714	zgc:112271	7:59553039-59564011	EGFP	SATB2	OK	7.79368	1.47528	-2.40132	-2.21484	0.0006	0.021125	yes
ENSDARG00000092970	tmsb2	3.90648	1.13494	17.0072	1.36925	0.952495	1.81522	ENSDARG00000092970	tmsb2	14:34486628-34488993	EGFP	SATB2	OK	7.34955	1.37899	-2.41404	-2.07735	0.002	0.0465823	yes
ENSDARG00000040362	ehd2b	68.1854	42.5504	237.973	30.3051	26.8336	7.81221	ENSDARG00000040362	ehd2b	18:44630414-44663244	EGFP	SATB2	OK	116.236	21.6503	-2.4246	-2.03824	0.00215	0.0483835	yes
ENSDARG00000002506	zgc:92818	18.7244	17.2992	23.3282	3.20865	3.73535	4.06676	ENSDARG00000002506	zgc:92818	7:41873079-41881238	EGFP	SATB2	OK	19.7839	3.67026	-2.43038	-2.34243	0.0001	0.00571692	yes
ENSDARG00000061989	mpnd	13.1283	4.29755	13.1471	3.57418	1.53723	0.509661	ENSDARG00000061989	mpnd	8:18830758-18840694	EGFP	SATB2	OK	10.191	1.87369	-2.44334	-2.32083	0.0004	0.0162871	yes
ENSDARG00000060023	ncapg2	17.0807	25.0132	12.6436	1.2459	4.97923	3.83023	ENSDARG00000060023	ncapg2	7:40205393-40227602	EGFP	SATB2	OK	18.2458	3.35179	-2.44456	-1.18594	0.00105	0.0306722	yes
ENSDARG00000043257	ckbb	281.147	190.506	267.008	55.9722	55.7703	22.7335	ENSDARG00000043257	ckbb	20:20816746-20821789	EGFP	SATB2	OK	246.22	44.8253	-2.45756	-2.82519	5e-05	0.00325273	yes
ENSDARG00000014233	sept8b	13.3344	0.864135	2.69875	0.929349	1.41179	0.732734	ENSDARG00000014233	sept8b	14:49040189-49063157	EGFP	SATB2	OK	5.63244	1.02462	-2.45866	-1.96758	0.001	0.029749	yes
ENSDARG00000099203	atp1b2a	9.93699	141.833	36.0891	11.0528	18.2855	4.76931	ENSDARG00000099203	atp1b2a	23:44732862-44763861	EGFP	SATB2	OK	62.6198	11.3692	-2.46149	-1.79889	5e-05	0.00325273	yes
ENSDARG00000022213	uck2b	46.0952	36.6226	26.2015	6.63117	7.29452	5.78987	ENSDARG00000022213	uck2b	2:6051915-6065416	EGFP	SATB2	OK	36.3064	6.57185	-2.46585	-2.84058	5e-05	0.00325273	yes
ENSDARG00000037176	ggh	30.4865	13.6478	15.3626	4.28676	3.6495	2.76925	ENSDARG00000037176	ggh	7:58179512-58186877	EGFP	SATB2	OK	19.8323	3.5685	-2.47446	-2.31359	0.0008	0.0257994	yes
ENSDARG00000112561	si:dkey-108k21.11	214.306	33.8933	40.2066	16.7497	10.4366	24.6844	ENSDARG00000112561	si:dkey-108k21.11	25:35054245-35054619	EGFP	SATB2	OK	96.1353	17.2902	-2.47511	-2.30561	0.0001	0.00571692	yes
ENSDARG00000004169	stmn1a	166.339	42.776	37.9355	11.3662	13.0351	19.9402	ENSDARG00000004169	stmn1a	19:17205142-17210928	EGFP	SATB2	OK	82.35	14.7805	-2.47807	-2.73286	5e-05	0.00325273	yes
ENSDARG00000092467	si:ch73-46j18.5	65.1213	59.6712	93.5278	17.4058	14.5449	7.06293	ENSDARG00000092467	si:ch73-46j18.5	10:1708116-1718395	EGFP	SATB2	OK	72.7734	13.0045	-2.4844	-3.1203	5e-05	0.00325273	yes
ENSDARG00000004115	mgat4b	26.6151	5.86627	30.9602	5.07414	4.46553	1.66419	ENSDARG00000004115	mgat4b	14:16483925-16754262	EGFP	SATB2	OK	21.1472	3.73462	-2.50143	-2.74645	5e-05	0.00325273	yes
ENSDARG00000104571	gadd45ab	127.933	8.98006	20.1047	9.46008	6.73791	11.4875	ENSDARG00000104571	gadd45ab	6:23891229-23939154	EGFP	SATB2	OK	52.3391	9.22849	-2.50372	-2.33371	0.0013	0.0349533	yes
ENSDARG00000091280	si:ch211-66k16.27	22.88	13.4269	12.9451	1.87456	3.1849	3.60658	ENSDARG00000091280	si:ch211-66k16.27	2:45441006-45448291	EGFP	SATB2	OK	16.4173	2.88868	-2.50674	-2.05153	0.00055	0.0199223	yes
ENSDARG00000103435	sorbs1	49.7768	13.2596	41.8822	9.41063	7.70864	1.31005	ENSDARG00000103435	sorbs1	13:23132665-23226460	EGFP	SATB2	OK	34.9729	6.14311	-2.5092	-1.55432	5e-05	0.00325273	yes
ENSDARG00000070898	si:ch211-262h13.3	13.9902	17.5512	12.193	0.993641	3.4653	3.19824	ENSDARG00000070898	si:ch211-262h13.3	22:38796338-38801510	EGFP	SATB2	OK	14.5781	2.5524	-2.51388	-2.23253	0.0006	0.021125	yes
ENSDARG00000099222	prpsap1	100.39	121.249	253.28	18.7587	33.0245	31.161	ENSDARG00000099222	prpsap1	3:59070400-59083158	EGFP	SATB2	OK	158.306	27.6481	-2.51747	-2.74306	5e-05	0.00325273	yes
ENSDARG00000060349	wasf1	6.7547	40.2109	9.70021	6.61195	2.07109	1.17451	ENSDARG00000060349	wasf1	20:53300587-53366137	EGFP	SATB2	OK	18.8886	3.28585	-2.52318	-2.13299	0.0013	0.0349533	yes
ENSDARG00000056087	ecrg4a	2.99389	46.5992	15.4433	2.57506	6.09689	2.61254	ENSDARG00000056087	ecrg4a	9:6371918-6380653	EGFP	SATB2	OK	21.6788	3.7615	-2.52691	-1.91005	0.0013	0.0349533	yes
ENSDARG00000036117	mchr2	90.7247	101.58	166.979	47.5444	14.5453	0.164054	ENSDARG00000036117	mchr2	24:34806821-34823043	EGFP	SATB2	OK	119.761	20.7513	-2.52889	-2.03068	0.00055	0.0199223	yes
ENSDARG00000024877	ptgr1	118.621	80.2717	70.5897	11.521	12.7291	22.4009	ENSDARG00000024877	ptgr1	7:24375069-24390879	EGFP	SATB2	OK	89.8274	15.5503	-2.53021	-2.74054	5e-05	0.00325273	yes
ENSDARG00000042210	sema3ab	28.95	12.895	66.5619	2.76192	7.63861	8.35087	ENSDARG00000042210	sema3ab	18:9323210-9439922	EGFP	SATB2	OK	36.1356	6.25047	-2.53139	-2.75342	5e-05	0.00325273	yes
ENSDARG00000102277	lama1	2.5238	10.8826	12.3662	2.06885	2.15297	0.232653	ENSDARG00000102277	lama1	24:41690544-41784173	EGFP	SATB2	OK	8.59088	1.48483	-2.53251	-2.80994	5e-05	0.00325273	yes
ENSDARG00000001906	si:dkey-247m21.3	16.9476	1.40578	21.3003	3.83534	1.77311	1.20157	ENSDARG00000001906	si:dkey-247m21.3	21:20229925-20308457	EGFP	SATB2	OK	13.2179	2.27001	-2.54172	-2.09918	0.00065	0.0224319	yes
ENSDARG00000079068	adam12	2.89837	0.557009	6.56555	0.640973	0.913389	0.161072	ENSDARG00000079068	adam12	17:32158950-32334107	EGFP	SATB2	OK	3.34031	0.571811	-2.54637	-1.89223	0.0002	0.00939378	yes
ENSDARG00000042188	ttc38	42.7079	8.29063	66.485	5.10242	6.90676	7.80645	ENSDARG00000042188	ttc38	18:10926196-10959429	EGFP	SATB2	OK	39.1612	6.60521	-2.56775	-1.75988	0.00095	0.0289462	yes
ENSDARG00000007383	kcnk6	73.6299	9.85052	205.212	25.2718	19.7423	3.38004	ENSDARG00000007383	kcnk6	18:46171103-46208581	EGFP	SATB2	OK	96.2309	16.1314	-2.57663	-2.71041	5e-05	0.00325273	yes
ENSDARG00000075730	dnph1	38.6999	13.7356	19.3328	2.53126	4.64616	4.83704	ENSDARG00000075730	dnph1	13:4218328-4223955	EGFP	SATB2	OK	23.9228	4.00482	-2.57858	-2.39373	0.0004	0.0162871	yes
ENSDARG00000007818	palm1b	252.382	109.278	243.257	22.5713	51.0527	27.4026	ENSDARG00000007818	palm1b	2:26237321-26284245	EGFP	SATB2	OK	201.639	33.6755	-2.582	-2.86689	5e-05	0.00325273	yes
ENSDARG00000105526	CR318601.1	33.2923	12.754	10.6661	5.20305	2.0145	2.21573	ENSDARG00000105526	CR318601.1	7:38573916-38577255	EGFP	SATB2	OK	18.9041	3.14443	-2.58783	-1.92531	0.0007	0.0235823	yes
ENSDARG00000101735	chn1	40.0409	16.4337	24.5552	3.64184	6.75413	3.06994	ENSDARG00000101735	chn1	9:2393763-2487171	EGFP	SATB2	OK	27.0099	4.48863	-2.58914	-2.40663	5e-05	0.00325273	yes
ENSDARG00000018619	cers4b	5.58871	19.1265	7.1631	2.10326	0.803107	2.38493	ENSDARG00000018619	cers4b	2:56356651-56387041	EGFP	SATB2	OK	10.6261	1.76377	-2.59088	-2.18342	0.00155	0.0394718	yes
ENSDARG00000105341	si:dkey-9l20.3	2.71167	0.143795	0.251816	0.170468	0.322388	0.0215253	ENSDARG00000105341	si:dkey-9l20.3	23:3538462-3641439	EGFP	SATB2	OK	1.03576	0.17146	-2.59475	-0.390072	5e-05	0.00325273	yes
ENSDARG00000058734	prdx1	234.477	34.7722	256.815	16.4973	46.1029	24.4101	ENSDARG00000058734	prdx1	2:6104377-6115688	EGFP	SATB2	OK	175.355	29.0034	-2.59598	-2.81081	5e-05	0.00325273	yes
ENSDARG00000061446	smap2	57.7984	28.2564	64.1915	13.8475	6.55423	4.44606	ENSDARG00000061446	smap2	19:38387254-38419575	EGFP	SATB2	OK	50.0821	8.28259	-2.59614	-2.80563	5e-05	0.00325273	yes
ENSDARG00000023537	ahr1b	8.56437	12.4145	3.19263	3.00583	0.757861	0.232921	ENSDARG00000023537	ahr1b	22:12979212-13042992	EGFP	SATB2	OK	8.05716	1.3322	-2.59646	-2.41748	0.0001	0.00571692	yes
ENSDARG00000095949	si:dkey-22i16.9	4.9247	0.72943	2.26888	0.343555	0.536583	0.428877	ENSDARG00000095949	si:dkey-22i16.9	1:43973879-43983405	EGFP	SATB2	OK	2.641	0.436338	-2.59757	-2.24294	0.0011	0.0317639	yes
ENSDARG00000059279	tfap2a	287.545	31.6782	137.211	53.6384	18.3892	2.97872	ENSDARG00000059279	tfap2a	24:8721675-8732519	EGFP	SATB2	OK	152.145	25.0021	-2.60532	-2.46879	5e-05	0.00325273	yes
ENSDARG00000069595	si:ch211-214c7.4	8.30183	4.14466	8.31788	1.01662	1.21339	1.1633	ENSDARG00000069595	si:ch211-214c7.4	1:45707218-45752261	EGFP	SATB2	OK	6.92146	1.13111	-2.61334	-3.01634	5e-05	0.00325273	yes
ENSDARG00000069600	zgc:109889	29.3773	22.8055	30.3469	2.37018	3.86692	7.01802	ENSDARG00000069600	zgc:109889	7:23495985-23543642	EGFP	SATB2	OK	27.5099	4.41837	-2.63836	-2.33192	5e-05	0.00325273	yes
ENSDARG00000060837	trpc5b	9.49731	0.703701	2.96684	1.62677	0.438566	0.0410859	ENSDARG00000060837	trpc5b	21:34132746-34211658	EGFP	SATB2	OK	4.38928	0.702141	-2.64415	-2.10945	0.00085	0.0269135	yes
ENSDARG00000091592	peli1a	2.4456	8.70011	2.82274	1.01703	0.738928	0.478475	ENSDARG00000091592	peli1a	1:55044657-55068941	EGFP	SATB2	OK	4.65615	0.744812	-2.64419	-1.60523	0.0019	0.0448531	yes
ENSDARG00000094732	mical3b	25.9017	3.01237	30.2023	4.93593	1.9979	2.47099	ENSDARG00000094732	mical3b	4:9669716-9764769	EGFP	SATB2	OK	19.7055	3.13494	-2.65208	-1.12592	0.00165	0.0411845	yes
ENSDARG00000052279	osgn1	15.9954	11.2574	25.3785	3.00432	3.26286	2.10393	ENSDARG00000052279	osgn1	6:50695380-50704689	EGFP	SATB2	OK	17.5438	2.79037	-2.65243	-2.80614	5e-05	0.00325273	yes
ENSDARG00000099729	pcdh10a	670.522	275.159	1190.93	43.1882	95.9989	200.337	ENSDARG00000099729	pcdh10a	1:12763460-12797410	EGFP	SATB2	OK	712.203	113.175	-2.65374	-1.23104	0.00085	0.0269135	yes
ENSDARG00000094316	si:rp71-80o10.4	60.8113	37.1868	15.2588	4.55224	6.72146	6.46645	ENSDARG00000094316	si:rp71-80o10.4	23:43300891-43307237	EGFP	SATB2	OK	37.7523	5.91338	-2.67451	-2.73232	5e-05	0.00325273	yes
ENSDARG00000115778	chrnb2a	11.7395	0.498929	8.57642	1.53541	0.518713	1.19251	ENSDARG00000115778	chrnb2a	1:22542456-22594338	EGFP	SATB2	OK	6.93827	1.08221	-2.68059	-2.61147	5e-05	0.00325273	yes
ENSDARG00000063264	pcdh9	34.449	8.93353	41.0757	8.87487	3.22038	0.98925	ENSDARG00000063264	pcdh9	6:4872882-4984243	EGFP	SATB2	OK	28.1527	4.3615	-2.69038	-2.84016	0.0001	0.00571692	yes
ENSDARG00000056638	pir	98.6552	27.213	35.1374	4.95808	6.67283	13.2143	ENSDARG00000056638	pir	11:29917612-29946927	EGFP	SATB2	OK	53.6685	8.28175	-2.69607	-2.679	5e-05	0.00325273	yes
ENSDARG00000020493	lgi1a	3.94922	2.02005	3.85076	0.292697	0.640992	0.542698	ENSDARG00000020493	lgi1a	13:421230-430143	EGFP	SATB2	OK	3.27334	0.492129	-2.73366	-2.36491	0.00035	0.0147006	yes
ENSDARG00000095673	si:dkey-79f11.8	1.213	7.61534	11.8113	1.13566	0.650285	1.28963	ENSDARG00000095673	si:dkey-79f11.8	1:7946841-7951002	EGFP	SATB2	OK	6.87988	1.02519	-2.74649	-2.28047	0.00045	0.0174744	yes
ENSDARG00000077082	agtrap	636.559	69.0704	253.404	41.9086	65.4558	35.4936	ENSDARG00000077082	agtrap	11:16040516-16064291	EGFP	SATB2	OK	319.678	47.6193	-2.747	-2.48575	0.00035	0.0147006	yes
ENSDARG00000026170	hps1	241.565	73.0422	100.407	30.0943	26.8441	4.45242	ENSDARG00000026170	hps1	13:40686132-40726865	EGFP	SATB2	OK	138.338	20.4636	-2.75707	-1.19059	0.001	0.029749	yes
ENSDARG00000031763	smad6b	23.7715	1.25422	0.669578	1.74549	1.48779	0.566228	ENSDARG00000031763	smad6b	18:19648274-19699061	EGFP	SATB2	OK	8.5651	1.2665	-2.75762	-2.0708	0.00105	0.0306722	yes
ENSDARG00000078331	best1	5.00515	3.25734	1.72616	0.458427	0.95544	0.0619045	ENSDARG00000078331	best1	25:3069670-3087556	EGFP	SATB2	OK	3.32955	0.491924	-2.75882	-2.00506	0.002	0.0465823	yes
ENSDARG00000030530	slc22a2	10.6557	22.4757	21.7542	2.79434	4.62389	0.675944	ENSDARG00000030530	slc22a2	20:42668874-42688487	EGFP	SATB2	OK	18.2952	2.69806	-2.76147	-2.63064	0.00015	0.00775308	yes
ENSDARG00000045420	epdr1	31.719	7.30669	24.065	6.40302	2.1964	0.661332	ENSDARG00000045420	epdr1	2:31833996-31836902	EGFP	SATB2	OK	21.0302	3.08692	-2.76823	-2.62047	5e-05	0.00325273	yes
ENSDARG00000044767	tspan10	32.703	29.5935	95.4804	10.6698	9.96849	2.46523	ENSDARG00000044767	tspan10	3:15176736-15186292	EGFP	SATB2	OK	52.5923	7.70116	-2.77171	-3.04346	5e-05	0.00325273	yes
ENSDARG00000012801	pfkpb	71.7112	39.8273	54.6053	11.0951	8.1431	5.04486	ENSDARG00000012801	pfkpb	2:48119493-48171441	EGFP	SATB2	OK	55.3813	8.09434	-2.77441	-2.18608	5e-05	0.00325273	yes
ENSDARG00000071555	zgc:153675	24.7846	7.62131	13.3254	2.79433	2.08433	1.80168	ENSDARG00000071555	zgc:153675	22:812847-817479	EGFP	SATB2	OK	15.2438	2.22678	-2.77519	-2.52444	0.0003	0.0130109	yes
ENSDARG00000062174	cacnb4b	0.309047	0.468089	4.42928	0.304318	0.215887	0.236465	ENSDARG00000062174	cacnb4b	6:14086687-14146979	EGFP	SATB2	OK	1.73547	0.252223	-2.78255	-1.77367	0.0019	0.0448531	yes
ENSDARG00000003449	pde10a	51.9374	69.5589	73.3708	19.1221	5.84069	3.2248	ENSDARG00000003449	pde10a	13:4505078-4620715	EGFP	SATB2	OK	64.9557	9.39586	-2.78936	-3.06913	5e-05	0.00325273	yes
ENSDARG00000075436	sytl2b	3.27847	1.69791	1.57419	0.39931	0.42624	0.119888	ENSDARG00000075436	sytl2b	15:19688874-19724932	EGFP	SATB2	OK	2.18352	0.315146	-2.79257	-2.20124	0.00025	0.0112297	yes
ENSDARG00000007824	camta1b	2.20919	1.37322	0.422548	0.14832	0.180852	0.247814	ENSDARG00000007824	camta1b	11:39672873-39926872	EGFP	SATB2	OK	1.33498	0.192329	-2.79518	-2.65823	0.00015	0.00775308	yes
ENSDARG00000036809	si:ch211-106j24.1	5.53653	16.7849	3.21196	1.61064	1.62184	0.42901	ENSDARG00000036809	si:ch211-106j24.1	7:15373411-15413188	EGFP	SATB2	OK	8.51114	1.2205	-2.80188	-2.63669	5e-05	0.00325273	yes
ENSDARG00000007172	plxna3	21.2188	18.406	28.8449	6.84632	2.15288	0.805655	ENSDARG00000007172	plxna3	8:9222683-9570511	EGFP	SATB2	OK	22.8232	3.26828	-2.8039	-3.03131	5e-05	0.00325273	yes
ENSDARG00000052336	ociad2	0.750616	18.2935	4.89747	1.54374	0.834577	1.04292	ENSDARG00000052336	ociad2	20:23238832-23244193	EGFP	SATB2	OK	7.98052	1.14041	-2.80693	-2.10065	0.00045	0.0174744	yes
ENSDARG00000029866	slc6a14	5.9984	13.8115	0.197556	1.10762	1.74562	0	ENSDARG00000029866	slc6a14	11:20994025-21014572	EGFP	SATB2	OK	6.66914	0.951082	-2.80986	-2.21338	0.00145	0.0374305	yes
ENSDARG00000021442	cdh11	11.4995	2.46435	16.1583	1.77012	1.856	0.643737	ENSDARG00000021442	cdh11	7:43760148-43859024	EGFP	SATB2	OK	10.0407	1.42328	-2.81856	-2.89313	5e-05	0.00325273	yes
ENSDARG00000097006	CR854839.1	8.54838	24.1293	21.9686	6.21205	0.570261	0.953403	ENSDARG00000097006	CR854839.1	3:51417421-51446595	EGFP	SATB2	OK	18.2154	2.57857	-2.82052	-2.3633	0.00075	0.0247511	yes
ENSDARG00000075962	vav3b	39.2649	2.24635	1.77568	0.771454	2.15677	3.06519	ENSDARG00000075962	vav3b	2:15993388-16159491	EGFP	SATB2	OK	14.429	1.9978	-2.85248	-1.49061	5e-05	0.00325273	yes
ENSDARG00000020143	pah	203.812	51.4504	137.939	14.4328	27.0582	12.6856	ENSDARG00000020143	pah	4:17391679-17409533	EGFP	SATB2	OK	131.067	18.0589	-2.85953	-3.35613	5e-05	0.00325273	yes
ENSDARG00000004305	vangl1	9.62691	6.39009	6.03641	0.646227	1.57772	0.81333	ENSDARG00000004305	vangl1	9:33009283-33055440	EGFP	SATB2	OK	7.35113	1.01243	-2.86015	-2.61201	0.0002	0.00939378	yes
ENSDARG00000103903	LO017650.1	5.35063	3.62284	2.86801	0.465281	0.559797	0.598491	ENSDARG00000103903	LO017650.1	12:39685484-39770387	EGFP	SATB2	OK	3.94716	0.541189	-2.86661	-2.54147	0.0005	0.0187099	yes
ENSDARG00000092774	tarsl2	0.865384	2.30771	9.54345	0.565026	0.591273	0.566694	ENSDARG00000092774	tarsl2	18:210837-226800	EGFP	SATB2	OK	4.23885	0.574331	-2.88372	-2.26248	0.0022	0.0487814	yes
ENSDARG00000079496	bicd1a	17.3119	0.270814	2.05292	0.0800769	1.59709	0.980523	ENSDARG00000079496	bicd1a	18:12058402-12118907	EGFP	SATB2	OK	6.54523	0.885898	-2.88523	-2.34914	0.0002	0.00939378	yes
ENSDARG00000088584	si:ch73-352p18.4	2.76468	25.791	15.4568	2.96462	1.47106	1.4834	ENSDARG00000088584	si:ch73-352p18.4	22:1028723-1042756	EGFP	SATB2	OK	14.6708	1.97303	-2.89447	-2.66974	0.00015	0.00775308	yes
ENSDARG00000052826	runx3	204.148	14.1432	123.175	16.9207	22.0438	6.89116	ENSDARG00000052826	runx3	13:45092765-45225980	EGFP	SATB2	OK	113.822	15.2852	-2.89657	-2.81836	0.00045	0.0174744	yes
ENSDARG00000100900	si:ch211-183d5.2	1.15899	32.2293	9.89262	0.954409	1.86524	2.96929	ENSDARG00000100900	si:ch211-183d5.2	7:8967973-8981507	EGFP	SATB2	OK	14.427	1.92965	-2.90236	-2.20906	5e-05	0.00325273	yes
ENSDARG00000062487	si:dkey-6n6.1	2.14546	19.1768	1.31224	1.12109	0.608661	1.28069	ENSDARG00000062487	si:dkey-6n6.1	8:14130244-14151051	EGFP	SATB2	OK	7.54482	1.00348	-2.91047	-2.53318	5e-05	0.00325273	yes
ENSDARG00000060018	si:ch1073-44g3.1	5.49326	5.59158	4.18019	1.25755	0.57183	0.175761	ENSDARG00000060018	si:ch1073-44g3.1	14:49135263-49137035	EGFP	SATB2	OK	5.08834	0.66838	-2.92845	-2.25935	0.00225	0.0491677	yes
ENSDARG00000100808	znf1183	2.83508	4.31921	29.5926	1.7388	1.28613	1.79912	ENSDARG00000100808	znf1183	22:1610182-1613586	EGFP	SATB2	OK	12.249	1.60802	-2.92931	-2.37117	0.0002	0.00939378	yes
ENSDARG00000003655	tmem59l	29.8605	41.8882	69.6758	4.07	8.0728	6.39638	ENSDARG00000003655	tmem59l	22:21128112-21150845	EGFP	SATB2	OK	47.1415	6.17972	-2.93138	-3.38942	5e-05	0.00325273	yes
ENSDARG00000031745	si:busm1-266f07.2	17.5175	25.4279	124.589	10.8719	3.55648	7.51309	ENSDARG00000031745	si:busm1-266f07.2	8:36472443-36475328	EGFP	SATB2	OK	55.8447	7.31382	-2.93272	-3.03259	5e-05	0.00325273	yes
ENSDARG00000020054	aox6	0.500007	56.7928	0.741093	5.77701	0.710864	1.10732	ENSDARG00000020054	aox6	22:14051244-14083583	EGFP	SATB2	OK	19.3446	2.53173	-2.93374	-2.12929	0.00075	0.0247511	yes
ENSDARG00000100981	CABZ01055306.1	2.32466	0.0504022	2.2109	0.190756	0.21473	0.189718	ENSDARG00000100981	CABZ01055306.1	2:7668572-7696503	EGFP	SATB2	OK	1.52865	0.198401	-2.94577	-2.38704	0.00045	0.0174744	yes
ENSDARG00000093098	ccl34b.8	26.281	21.3589	55.2126	8.25672	1.47471	3.54409	ENSDARG00000093098	ccl34b.8	24:27450084-27452488	EGFP	SATB2	OK	34.2841	4.42517	-2.95374	-2.52345	0.00125	0.0343431	yes
ENSDARG00000043317	kita	158.645	279.017	428.404	45.6463	38.7253	26.674	ENSDARG00000043317	kita	20:22335510-22378401	EGFP	SATB2	OK	288.689	37.0152	-2.96332	-3.09448	5e-05	0.00325273	yes
ENSDARG00000011821	plod2	160.525	0.518719	9.36484	2.8006	2.14923	16.5694	ENSDARG00000011821	plod2	24:5237708-5314707	EGFP	SATB2	OK	56.803	7.17309	-2.9853	-1.77581	0.0002	0.00939378	yes
ENSDARG00000087740	BX664618.1	35.2916	2.48881	36.7916	4.19426	3.09422	2.12721	ENSDARG00000087740	BX664618.1	8:21030141-21043897	EGFP	SATB2	OK	24.8573	3.13856	-2.9855	-2.87582	0.0001	0.00571692	yes
ENSDARG00000043858	cdk19	2.78568	19.8773	2.52178	0.934749	1.36485	0.876953	ENSDARG00000043858	cdk19	20:2879699-2949028	EGFP	SATB2	OK	8.39493	1.05885	-2.98702	-1.38775	0.0006	0.021125	yes
ENSDARG00000101322	tfr1a	12.6021	18.521	0.555082	1.88201	1.90697	0.167849	ENSDARG00000101322	tfr1a	2:4849268-4874966	EGFP	SATB2	OK	10.5594	1.31894	-3.00107	-2.77648	0.00015	0.00775308	yes
ENSDARG00000020711	rrm2	13.8122	8.59322	4.29697	0.42887	0.668398	2.23755	ENSDARG00000020711	rrm2	20:29492468-29499426	EGFP	SATB2	OK	8.90079	1.11161	-3.00129	-1.84337	0.00075	0.0247511	yes
ENSDARG00000075161	defbl1	51.9895	3.18033	45.145	6.45766	3.85635	1.98287	ENSDARG00000075161	defbl1	21:21741803-21742991	EGFP	SATB2	OK	33.4383	4.09896	-3.02817	-2.83768	5e-05	0.00325273	yes
ENSDARG00000110756	CLEC3A	44.0396	0.405652	5.30213	0.346205	4.74049	0.917518	ENSDARG00000110756	CLEC3A	7:65387373-65397354	EGFP	SATB2	OK	16.5825	2.0014	-3.05057	-2.34755	0.00105	0.0306722	yes
ENSDARG00000041747	sspn	35.5127	13.4666	91.5166	3.5913	7.62623	5.44592	ENSDARG00000041747	sspn	18:16111184-16123222	EGFP	SATB2	OK	46.832	5.55448	-3.07577	-2.76572	0.0001	0.00571692	yes
ENSDARG00000076239	si:ch211-74f19.2	40.4128	10.8532	13.3848	3.87852	1.90753	1.87139	ENSDARG00000076239	si:ch211-74f19.2	7:8890365-8961941	EGFP	SATB2	OK	21.5503	2.55248	-3.07774	-3.33081	5e-05	0.00325273	yes
ENSDARG00000010250	nqo1	102.874	30.8503	174.332	27.145	8.17945	1.15632	ENSDARG00000010250	nqo1	7:56703253-56722320	EGFP	SATB2	OK	102.685	12.1603	-3.07799	-2.90508	5e-05	0.00325273	yes
ENSDARG00000078362	zmp:0000000846	24.499	0.40335	3.02208	1.31403	0.727154	1.25967	ENSDARG00000078362	zmp:0000000846	5:5708575-5831037	EGFP	SATB2	OK	9.30813	1.10028	-3.08062	-2.71585	5e-05	0.00325273	yes
ENSDARG00000052437	mia	105.083	6.29464	343.01	30.7443	9.72007	12.8553	ENSDARG00000052437	mia	5:57653458-57655092	EGFP	SATB2	OK	151.463	17.7732	-3.09119	-2.79185	5e-05	0.00325273	yes
ENSDARG00000020764	slmapb	28.1116	77.2774	79.4622	12.4013	7.29214	1.90629	ENSDARG00000020764	slmapb	23:19590005-19604413	EGFP	SATB2	OK	61.617	7.19991	-3.09728	-2.82138	5e-05	0.00325273	yes
ENSDARG00000076075	myh7ba	0.282915	10.5691	0.0476703	0.473745	0.421842	0.369368	ENSDARG00000076075	myh7ba	11:25181885-25226926	EGFP	SATB2	OK	3.63323	0.421652	-3.10713	-1.21307	0.0018	0.0435831	yes
ENSDARG00000031749	CU861476.1	94.3245	1.602	34.466	4.75428	2.79666	7.34983	ENSDARG00000031749	CU861476.1	10:1899594-1900662	EGFP	SATB2	OK	43.4642	4.96692	-3.1294	-2.63643	5e-05	0.00325273	yes
ENSDARG00000092278	BX548015.1	64.1382	2.72701	1.32362	2.81474	1.45473	3.43857	ENSDARG00000092278	BX548015.1	1:30919335-30923141	EGFP	SATB2	OK	22.7296	2.56934	-3.1451	-2.45758	0.00025	0.0112297	yes
ENSDARG00000058508	cfap70	0.640672	6.24613	8.45124	0.654425	0.597887	0.427637	ENSDARG00000058508	cfap70	3:11977270-12026741	EGFP	SATB2	OK	5.11268	0.559983	-3.19063	-2.82965	0.0001	0.00571692	yes
ENSDARG00000079078	si:ch211-5k11.8	1813.26	1842.32	37.2879	222.788	130.618	47.5427	ENSDARG00000079078	si:ch211-5k11.8	3:55105065-55105966	EGFP	SATB2	OK	1230.95	133.65	-3.20325	-3.18162	5e-05	0.00325273	yes
ENSDARG00000041616	b3gnt9	6.02467	5.64754	13.1085	0.56099	1.2199	0.906556	ENSDARG00000041616	b3gnt9	18:17511994-17513426	EGFP	SATB2	OK	8.26023	0.895817	-3.20491	-2.77347	5e-05	0.00325273	yes
ENSDARG00000056267	dixdc1b	35.7842	7.74557	64.8448	6.93743	2.95677	1.82865	ENSDARG00000056267	dixdc1b	21:25068214-25119942	EGFP	SATB2	OK	36.1249	3.90762	-3.20863	-2.15123	0.0001	0.00571692	yes
ENSDARG00000104735	nkx6.2	3.59872	5.51372	4.18562	0.507629	0.730924	0.17667	ENSDARG00000104735	nkx6.2	13:51579850-51584264	EGFP	SATB2	OK	4.43269	0.471741	-3.23211	-2.53203	0.00155	0.0394718	yes
ENSDARG00000077089	blm	13.7967	5.04106	28.4236	0.640487	3.01537	1.32225	ENSDARG00000077089	blm	18:26428828-26453729	EGFP	SATB2	OK	15.7538	1.65937	-3.24699	-2.79441	5e-05	0.00325273	yes
ENSDARG00000107442	SLC35D3	3.08063	70.6169	2.16674	3.03498	1.95419	2.93356	ENSDARG00000107442	SLC35D3	20:39513434-39517164	EGFP	SATB2	OK	25.2881	2.64091	-3.25935	-2.452	5e-05	0.00325273	yes
ENSDARG00000075421	pttg1	59.5443	7.93924	11.0752	1.88082	3.97454	2.32884	ENSDARG00000075421	pttg1	14:34558479-34561282	EGFP	SATB2	OK	26.1863	2.72807	-3.26286	-2.87338	5e-05	0.00325273	yes
ENSDARG00000094579	b4galnt2.1	0.498277	7.73408	24.6262	2.03029	0.465895	0.909237	ENSDARG00000094579	b4galnt2.1	3:23063717-23085279	EGFP	SATB2	OK	10.9529	1.13514	-3.27036	-2.48679	0.00085	0.0269135	yes
ENSDARG00000096906	si:dkey-7i4.24	8.98959	0.140526	2.758	0.378184	0.778302	0.0745094	ENSDARG00000096906	si:dkey-7i4.24	15:714202-721558	EGFP	SATB2	OK	3.96271	0.410332	-3.27162	-2.30227	0.0014	0.0366412	yes
ENSDARG00000015891	ptprea	347.744	183.707	241.044	44.695	18.1858	16.9633	ENSDARG00000015891	ptprea	12:43376435-43576437	EGFP	SATB2	OK	257.498	26.6147	-3.27427	-3.2173	5e-05	0.00325273	yes
ENSDARG00000086691	dnajc12	14.2793	12.103	9.05971	1.79452	1.68803	0.174815	ENSDARG00000086691	dnajc12	13:50368667-50373021	EGFP	SATB2	OK	11.814	1.21912	-3.27658	-2.54667	0.00125	0.0343431	yes
ENSDARG00000103647	gpc5a	13.9474	0.743583	34.1043	1.42638	2.9176	0.689617	ENSDARG00000103647	gpc5a	1:3100243-3295045	EGFP	SATB2	OK	16.2651	1.67787	-3.27708	-2.88491	5e-05	0.00325273	yes
ENSDARG00000068397	tns2b	5.97128	10.6246	10.1614	1.0955	0.469116	1.15871	ENSDARG00000068397	tns2b	6:39011702-39037613	EGFP	SATB2	OK	8.91908	0.907774	-3.29649	-2.55967	0.0021	0.047685	yes
ENSDARG00000089087	hbba1	1658.03	1216.16	35.8998	188.72	70.241	36.4894	ENSDARG00000089087	hbba1	3:55103444-55104310	EGFP	SATB2	OK	970.03	98.4835	-3.30007	-2.78025	0.00015	0.00775308	yes
ENSDARG00000006990	creld1b	3.63531	4.59215	18.8976	1.08575	0.666523	0.98912	ENSDARG00000006990	creld1b	8:54202553-54210276	EGFP	SATB2	OK	9.04169	0.913798	-3.30665	-2.53728	5e-05	0.00325273	yes
ENSDARG00000045074	arl4d	31.5552	39.8608	88.7562	5.40906	5.90579	4.84729	ENSDARG00000045074	arl4d	12:27243058-27245757	EGFP	SATB2	OK	53.3907	5.38738	-3.30893	-3.58349	5e-05	0.00325273	yes
ENSDARG00000069105	fgfr4	133.794	0.29302	24.5861	2.13388	0.814043	12.9686	ENSDARG00000069105	fgfr4	21:37183123-37194839	EGFP	SATB2	OK	52.891	5.30551	-3.31746	-2.72384	0.00025	0.0112297	yes
ENSDARG00000097209	cox8b	76.5525	16.702	11.5442	0.802647	6.0672	3.40276	ENSDARG00000097209	cox8b	25:10499641-10503043	EGFP	SATB2	OK	34.9329	3.4242	-3.35075	-2.52644	0.00105	0.0306722	yes
ENSDARG00000025348	igfbp5b	54.1809	2.3428	4.65791	2.81469	1.77757	1.27307	ENSDARG00000025348	igfbp5b	9:46820635-46842179	EGFP	SATB2	OK	20.3939	1.95511	-3.38281	-3.00577	0.00035	0.0147006	yes
ENSDARG00000058256	draxin	0.874394	13.6549	4.36607	0.601967	0.659928	0.540493	ENSDARG00000058256	draxin	11:15931187-16013114	EGFP	SATB2	OK	6.29847	0.600796	-3.39005	-2.12396	0.00035	0.0147006	yes
ENSDARG00000076030	cacnb3b	23.7534	11.1792	19.2527	2.32386	2.70266	0.0967013	ENSDARG00000076030	cacnb3b	23:26946428-26959206	EGFP	SATB2	OK	18.0618	1.70774	-3.40278	-2.52374	0.00045	0.0174744	yes
ENSDARG00000097011	hbaa1	1570.13	750.826	14.3931	172.749	29.5659	17.4842	ENSDARG00000097011	hbaa1	3:55100044-55100936	EGFP	SATB2	OK	778.448	73.2664	-3.40938	-2.73397	0.0001	0.00571692	yes
ENSDARG00000011166	cahz	37.1523	30.4476	0.520638	3.79387	1.83972	0.699369	ENSDARG00000011166	cahz	2:29477382-29485408	EGFP	SATB2	OK	22.7068	2.11099	-3.42714	-3.15951	5e-05	0.00325273	yes
ENSDARG00000102096	adra2b	37.4536	17.4849	54.4477	7.25083	2.56458	0.144815	ENSDARG00000102096	adra2b	8:40644837-40646418	EGFP	SATB2	OK	36.4621	3.32008	-3.45711	-3.22409	5e-05	0.00325273	yes
ENSDARG00000075600	si:dkeyp-41f9.3	13.5221	13.0376	6.96047	1.46337	1.1247	0.417122	ENSDARG00000075600	si:dkeyp-41f9.3	10:9105006-9115383	EGFP	SATB2	OK	11.1734	1.00173	-3.4795	-3.39237	5e-05	0.00325273	yes
ENSDARG00000045753	tmtc2a	28.2766	1.08262	15.0485	0.974008	2.36025	0.642008	ENSDARG00000045753	tmtc2a	4:10959441-11024844	EGFP	SATB2	OK	14.8026	1.32542	-3.48132	-3.23366	5e-05	0.00325273	yes
ENSDARG00000103146	nlrc3	13.5349	97.5645	103.447	6.61469	4.59682	7.65764	ENSDARG00000103146	nlrc3	24:37449892-37466754	EGFP	SATB2	OK	71.5156	6.28971	-3.50719	-1.19105	0.0003	0.0130109	yes
ENSDARG00000102773	cacna1da	17.9628	4.33859	14.526	0.140849	1.36106	1.69059	ENSDARG00000102773	cacna1da	11:36793472-36963988	EGFP	SATB2	OK	12.2758	1.06416	-3.52803	-3.63936	5e-05	0.00325273	yes
ENSDARG00000002084	lamb2	0.448826	37.8377	0.214477	1.75914	0.962647	0.598926	ENSDARG00000002084	lamb2	23:20180158-20258490	EGFP	SATB2	OK	12.8337	1.1069	-3.53533	-3.12015	5e-05	0.00325273	yes
ENSDARG00000090980	apof	143.956	32.4049	31.4392	6.39755	9.64386	1.85829	ENSDARG00000090980	apof	6:39162293-39167732	EGFP	SATB2	OK	69.2668	5.96657	-3.53719	-3.68711	5e-05	0.00325273	yes
ENSDARG00000076280	ppp1r1b	43.4422	3.67038	26.7617	1.93723	1.35888	3.03542	ENSDARG00000076280	ppp1r1b	19:4912816-4962402	EGFP	SATB2	OK	24.6248	2.11051	-3.54445	-3.69477	5e-05	0.00325273	yes
ENSDARG00000086931	CABZ01029822.1	7.01875	15.1222	12.0711	0.469465	1.33336	1.12178	ENSDARG00000086931	CABZ01029822.1	19:6856588-6873107	EGFP	SATB2	OK	11.404	0.97487	-3.54819	-3.26446	5e-05	0.00325273	yes
ENSDARG00000096971	si:dkey-206p8.1	4.20782	1.24862	25.3817	0.452266	1.24581	0.929257	ENSDARG00000096971	si:dkey-206p8.1	17:46387085-46439252	EGFP	SATB2	OK	10.2794	0.875777	-3.55305	-2.23611	0.0009	0.0279878	yes
ENSDARG00000074117	si:dkey-1h24.2	8.44838	0.445791	12.5121	0.327669	0.578752	0.917141	ENSDARG00000074117	si:dkey-1h24.2	1:29608127-29653472	EGFP	SATB2	OK	7.13543	0.607854	-3.5532	-2.71636	0.00165	0.0411845	yes
ENSDARG00000086853	dpyda.3	7.02879	0.395928	11.8538	0.85909	0.441386	0.329632	ENSDARG00000086853	dpyda.3	24:30521618-30774116	EGFP	SATB2	OK	6.42616	0.543369	-3.56395	-2.91498	0.0001	0.00571692	yes
ENSDARG00000097238	hbba1	615.373	494.744	15.0962	54.0901	25.3058	13.6839	ENSDARG00000097238	hbba1	3:55098456-55099272	EGFP	SATB2	OK	375.071	31.0266	-3.59559	-3.69137	5e-05	0.00325273	yes
ENSDARG00000036186	mbpa	24.2561	0.0752491	1.32338	1.79097	0.0925517	0.226733	ENSDARG00000036186	mbpa	19:21814046-21850808	EGFP	SATB2	OK	8.55159	0.703417	-3.60374	-1.74304	0.00015	0.00775308	yes
ENSDARG00000079276	ube2ql1	18.8102	1.71915	56.6619	0.94189	3.5363	1.82711	ENSDARG00000079276	ube2ql1	19:27957118-27966780	EGFP	SATB2	OK	25.7304	2.10177	-3.6138	-2.39191	0.0006	0.021125	yes
ENSDARG00000098057	dscaml1	1.36002	8.38482	2.60729	0.329425	0.371805	0.304934	ENSDARG00000098057	dscaml1	15:12071036-12229874	EGFP	SATB2	OK	4.11737	0.335388	-3.61782	-3.21741	5e-05	0.00325273	yes
ENSDARG00000018856	dclk1a	1.09956	2.09598	6.12101	0.231393	0.299283	0.222937	ENSDARG00000018856	dclk1a	10:34737321-34871737	EGFP	SATB2	OK	3.10552	0.251204	-3.6279	-1.62834	0.0002	0.00939378	yes
ENSDARG00000063527	elmo2	39.4974	41.045	50.3097	2.84189	5.96358	1.5245	ENSDARG00000063527	elmo2	11:88246-103157	EGFP	SATB2	OK	43.6174	3.44332	-3.66303	-3.05674	5e-05	0.00325273	yes
ENSDARG00000014103	dkk1a	24.1105	54.7827	229.341	0.546597	20.9835	2.76696	ENSDARG00000014103	dkk1a	13:41022501-41026398	EGFP	SATB2	OK	102.745	8.09902	-3.66517	-3.08195	5e-05	0.00325273	yes
ENSDARG00000109824	CU182823.1	5.72149	18.6172	9.90888	0.698838	1.29642	0.704049	ENSDARG00000109824	CU182823.1	KN147637.2:37081-44843	EGFP	SATB2	OK	11.4158	0.899769	-3.66534	-3.35493	5e-05	0.00325273	yes
ENSDARG00000056740	tmeff1b	15.472	0.444218	1.50807	0.391101	0.48123	0.499176	ENSDARG00000056740	tmeff1b	24:33708803-33756003	EGFP	SATB2	OK	5.8081	0.457169	-3.66727	-2.5657	5e-05	0.00325273	yes
ENSDARG00000069981	cspg5a	23.844	2.41468	26.6117	1.57439	2.22487	0.180649	ENSDARG00000069981	cspg5a	16:42319437-42390640	EGFP	SATB2	OK	17.6234	1.32664	-3.73165	-3.42509	5e-05	0.00325273	yes
ENSDARG00000067626	ywhag1	27.4998	6.59405	25.709	0.713199	1.91364	1.83525	ENSDARG00000067626	ywhag1	5:3501858-3545221	EGFP	SATB2	OK	19.9343	1.48737	-3.74442	-3.45764	5e-05	0.00325273	yes
ENSDARG00000044605	stx12l	10.7856	29.3157	18.8699	1.03264	1.86694	1.483	ENSDARG00000044605	stx12l	16:7626534-7641367	EGFP	SATB2	OK	19.6571	1.46086	-3.75016	-3.30743	5e-05	0.00325273	yes
ENSDARG00000077239	si:ch211-165i18.2	32.6926	0.541557	25.7494	0.367601	1.62719	2.36324	ENSDARG00000077239	si:ch211-165i18.2	4:73606481-73612754	EGFP	SATB2	OK	19.6612	1.45268	-3.75856	-3.44263	5e-05	0.00325273	yes
ENSDARG00000101660	sntg2	7.33682	0.122289	0.467592	0.189646	0.330604	0.061708	ENSDARG00000101660	sntg2	17:3379672-3570911	EGFP	SATB2	OK	2.64224	0.193986	-3.76773	-2.34172	0.00105	0.0306722	yes
ENSDARG00000055723	hsp70l	36.9388	5.95212	30.8839	1.20981	1.32602	2.81656	ENSDARG00000055723	hsp70l	8:4798157-4800911	EGFP	SATB2	OK	24.5916	1.78413	-3.78487	-3.87876	5e-05	0.00325273	yes
ENSDARG00000028845	calcr	0.85871	28.7897	2.11086	1.78591	0.0850186	0.407518	ENSDARG00000028845	calcr	19:40716974-40826024	EGFP	SATB2	OK	10.5864	0.759481	-3.80106	-2.4798	5e-05	0.00325273	yes
ENSDARG00000101131	pbx1b	6.63056	1.03977	16.1489	0.583075	0.916469	0.199836	ENSDARG00000101131	pbx1b	6:2271558-2395013	EGFP	SATB2	OK	7.93974	0.56646	-3.80905	-2.89525	0.0005	0.0187099	yes
ENSDARG00000007682	ppdpfa	117.776	7.08604	6.08272	6.73248	0.882147	1.68205	ENSDARG00000007682	ppdpfa	8:23213319-23216035	EGFP	SATB2	OK	43.6484	3.09889	-3.81611	-2.95312	5e-05	0.00325273	yes
ENSDARG00000040257	slc38a11	209.97	35.188	127.236	10.7029	11.4458	3.61497	ENSDARG00000040257	slc38a11	9:49906036-50032969	EGFP	SATB2	OK	124.132	8.58789	-3.85342	-4.01246	5e-05	0.00325273	yes
ENSDARG00000054754	hs6st1a	31.1528	26.4933	8.43436	1.60408	1.68848	1.21312	ENSDARG00000054754	hs6st1a	2:40901996-41124013	EGFP	SATB2	OK	22.0268	1.5019	-3.87441	-3.11051	0.0004	0.0162871	yes
ENSDARG00000006025	tp53i11b	214.091	24.4139	251.546	11.9738	14.6832	6.60892	ENSDARG00000006025	tp53i11b	18:27439679-27570030	EGFP	SATB2	OK	163.35	11.0887	-3.88081	-3.71528	5e-05	0.00325273	yes
ENSDARG00000055459	dlgap3	3.64202	38.7568	11.636	0.808994	1.63275	1.21931	ENSDARG00000055459	dlgap3	19:37458609-37492517	EGFP	SATB2	OK	18.0116	1.22035	-3.88356	-4.0142	5e-05	0.00325273	yes
ENSDARG00000041073	si:dkey-12e7.4	14.2064	4.38259	2.59758	0.4452	0.835396	0.119609	ENSDARG00000041073	si:dkey-12e7.4	18:21171464-21177674	EGFP	SATB2	OK	7.06219	0.466735	-3.91944	-2.6014	0.0021	0.047685	yes
ENSDARG00000102334	SH3RF3	2.44357	28.3452	5.23993	0.720798	0.911894	0.732461	ENSDARG00000102334	SH3RF3	9:55893788-55946377	EGFP	SATB2	OK	12.0096	0.788384	-3.92914	-3.85757	5e-05	0.00325273	yes
ENSDARG00000068994	pimr129	2.03279	23.0988	0.427668	0.535856	0.447805	0.660675	ENSDARG00000068994	pimr129	20:39489930-39498164	EGFP	SATB2	OK	8.51976	0.548112	-3.95827	-2.77318	5e-05	0.00325273	yes
ENSDARG00000071192	cx40.8	71.8724	5.2719	31.2318	2.55447	1.87967	2.40841	ENSDARG00000071192	cx40.8	17:15413411-15417217	EGFP	SATB2	OK	36.1254	2.28085	-3.98537	-4.0394	5e-05	0.00325273	yes
ENSDARG00000060668	tm4sf18	18.2779	223.655	192.606	6.53869	15.5259	4.96928	ENSDARG00000060668	tm4sf18	22:38159822-38168571	EGFP	SATB2	OK	144.846	9.01127	-4.00665	-2.6372	5e-05	0.00325273	yes
ENSDARG00000071709	ppp1r9bb	10.5374	4.9471	0.841614	0.413977	0.556136	0.028881	ENSDARG00000071709	ppp1r9bb	12:9703171-9774747	EGFP	SATB2	OK	5.44203	0.332998	-4.03056	-1.48462	0.00065	0.0224319	yes
ENSDARG00000028118	dscamb	4.55567	0.215752	0.4018	0.138656	0.0945364	0.0826784	ENSDARG00000028118	dscamb	15:6138422-6404443	EGFP	SATB2	OK	1.72441	0.10529	-4.03366	-2.82936	0.00025	0.0112297	yes
ENSDARG00000032746	tnfsf10l3	73.7549	16.2587	85.6687	1.89905	6.61042	2.04622	ENSDARG00000032746	tnfsf10l3	21:30701901-30714665	EGFP	SATB2	OK	58.5608	3.51856	-4.05688	-3.86179	5e-05	0.00325273	yes
ENSDARG00000091888	si:dkeyp-69c1.9	255.383	39.0335	62.788	14.0549	6.507	0.266302	ENSDARG00000091888	si:dkeyp-69c1.9	21:22706252-22709251	EGFP	SATB2	OK	119.068	6.94273	-4.10014	-3.72635	5e-05	0.00325273	yes
ENSDARG00000011076	zgc:91968	916.024	443.944	1719.66	27.163	137.397	9.84541	ENSDARG00000011076	zgc:91968	19:4990319-4999232	EGFP	SATB2	OK	1026.54	58.1351	-4.14224	-2.26765	5e-05	0.00325273	yes
ENSDARG00000103184	si:ch211-102l7.3	6.23033	12.5634	5.05653	0.751338	0.378436	0.168871	ENSDARG00000103184	si:ch211-102l7.3	7:49797527-49845755	EGFP	SATB2	OK	7.95009	0.432882	-4.19893	-2.14432	0.00035	0.0147006	yes
ENSDARG00000053479	gdf6a	58.7414	0.149736	0.512188	1.92805	0.783232	0.51279	ENSDARG00000053479	gdf6a	16:39125588-39131666	EGFP	SATB2	OK	19.8011	1.07469	-4.20359	-3.27232	5e-05	0.00325273	yes
ENSDARG00000063133	slc4a10a	39.6198	7.44195	4.14125	0.601099	0.906395	1.23515	ENSDARG00000063133	slc4a10a	11:10669460-10798064	EGFP	SATB2	OK	17.0677	0.914215	-4.22259	-3.72011	5e-05	0.00325273	yes
ENSDARG00000062821	slc6a15	2.14758	5.88313	108.952	2.93231	1.42691	1.89776	ENSDARG00000062821	slc6a15	18:16151773-16181952	EGFP	SATB2	OK	38.9943	2.08566	-4.22469	-3.58919	0.0001	0.00571692	yes
ENSDARG00000024492	col9a2	19.5236	0.696102	19.8411	0.74124	1.18253	0.180118	ENSDARG00000024492	col9a2	19:38422058-38467554	EGFP	SATB2	OK	13.3536	0.701295	-4.25106	-2.05393	0.0001	0.00571692	yes
ENSDARG00000062297	soat1	163.456	8.75765	154.582	6.69808	4.71147	5.24552	ENSDARG00000062297	soat1	8:14886451-14910223	EGFP	SATB2	OK	108.932	5.55169	-4.29436	-4.72868	5e-05	0.00325273	yes
ENSDARG00000035629	parvab	86.5075	12.598	22.6879	2.21955	2.87094	1.07972	ENSDARG00000035629	parvab	7:65673884-65706839	EGFP	SATB2	OK	40.5978	2.05674	-4.30297	-3.98901	5e-05	0.00325273	yes
ENSDARG00000023712	mao	42.6698	19.5651	23.6804	1.45243	2.50604	0.388251	ENSDARG00000023712	mao	9:33660963-33725972	EGFP	SATB2	OK	28.6384	1.44891	-4.30492	-4.24092	5e-05	0.00325273	yes
ENSDARG00000044501	viml	127.552	5.40509	29.3936	1.60337	6.54477	0.0544534	ENSDARG00000044501	viml	2:50391330-50409763	EGFP	SATB2	OK	54.117	2.7342	-4.30689	-3.62597	5e-05	0.00325273	yes
ENSDARG00000016771	tfa	38.4782	0.177929	2.26485	0.624597	0.694189	0.712066	ENSDARG00000016771	tfa	2:16780642-16794710	EGFP	SATB2	OK	13.6403	0.676951	-4.33269	-2.92157	5e-05	0.00325273	yes
ENSDARG00000104685	grk1b	134.531	69.6715	23.7936	0.247461	9.74134	1.1229	ENSDARG00000104685	grk1b	5:54161361-54197084	EGFP	SATB2	OK	75.9987	3.7039	-4.35886	-3.374	5e-05	0.00325273	yes
ENSDARG00000017367	rhbdf1b	2.23483	9.67437	6.02371	0.363583	0.31918	0.183368	ENSDARG00000017367	rhbdf1b	12:20227394-20303438	EGFP	SATB2	OK	5.97764	0.28871	-4.37188	-3.41821	0.00055	0.0199223	yes
ENSDARG00000076020	pappa2	2.57167	1.36307	4.22882	0.147799	0.159124	0.0849873	ENSDARG00000076020	pappa2	2:34986200-35103069	EGFP	SATB2	OK	2.72119	0.130637	-4.3806	-3.35942	0.00045	0.0174744	yes
ENSDARG00000036156	fnbp1a	10.6187	1.95108	5.14207	0.203901	0.197702	0.446121	ENSDARG00000036156	fnbp1a	8:11578317-11640240	EGFP	SATB2	OK	5.90394	0.282575	-4.38497	-3.25801	0.00065	0.0224319	yes
ENSDARG00000099753	zgc:63863	81.2123	42.7071	55.7974	2.08555	4.57849	1.87477	ENSDARG00000099753	zgc:63863	19:1329538-1363759	EGFP	SATB2	OK	59.9056	2.84627	-4.39555	-4.84588	5e-05	0.00325273	yes
ENSDARG00000004377	ppp1r13ba	34.6197	2.29942	96.4516	2.41484	1.7155	2.20173	ENSDARG00000004377	ppp1r13ba	17:14614144-14691576	EGFP	SATB2	OK	44.4569	2.11069	-4.39662	-2.91929	5e-05	0.00325273	yes
ENSDARG00000089643	mcama	17.3213	6.11372	10.4324	0.82535	0.499446	0.278744	ENSDARG00000089643	mcama	5:58850625-58939460	EGFP	SATB2	OK	11.2891	0.534513	-4.40056	-4.29763	5e-05	0.00325273	yes
ENSDARG00000103503	dgat1a	17.9574	18.213	8.19279	0.316578	1.02365	0.745397	ENSDARG00000103503	dgat1a	19:1370503-1393308	EGFP	SATB2	OK	14.7877	0.695208	-4.41081	-4.05971	5e-05	0.00325273	yes
ENSDARG00000020114	slc20a1a	103.556	13.9359	133.489	6.77703	4.39887	0.570327	ENSDARG00000020114	slc20a1a	8:31057114-31075015	EGFP	SATB2	OK	83.6604	3.91541	-4.41731	-3.47368	5e-05	0.00325273	yes
ENSDARG00000053269	slc2a15b	366.197	51.1141	365.672	3.78965	25.4622	5.81344	ENSDARG00000053269	slc2a15b	1:31573224-31598417	EGFP	SATB2	OK	260.994	11.6884	-4.48086	-4.53134	5e-05	0.00325273	yes
ENSDARG00000006456	pdgfrl	11.0795	27.858	12.1198	1.12458	0.752063	0.381876	ENSDARG00000006456	pdgfrl	14:30359123-30366196	EGFP	SATB2	OK	17.0191	0.752839	-4.49867	-3.51674	0.0002	0.00939378	yes
ENSDARG00000034757	zdhhc2	43.3938	47.8871	200.343	4.19293	8.20693	0.461639	ENSDARG00000034757	zdhhc2	14:30426955-30452218	EGFP	SATB2	OK	97.208	4.28717	-4.50298	-3.66145	5e-05	0.00325273	yes
ENSDARG00000029219	avpr2ab	27.882	1.24399	29.0368	0.57787	0.970358	0.92449	ENSDARG00000029219	avpr2ab	23:18527027-18543359	EGFP	SATB2	OK	19.3876	0.824239	-4.55593	-3.41506	5e-05	0.00325273	yes
ENSDARG00000102051	mtbl	3938.92	1043.34	1373.78	146.214	105.901	13.5608	ENSDARG00000102051	mtbl	7:29148713-29149228	EGFP	SATB2	OK	2118.68	88.5584	-4.58039	-4.21379	5e-05	0.00325273	yes
ENSDARG00000029204	tyrp1a	363.08	592.866	275.903	30.1092	16.0419	2.46508	ENSDARG00000029204	tyrp1a	7:74084202-74090168	EGFP	SATB2	OK	410.616	16.2054	-4.66325	-4.96822	5e-05	0.00325273	yes
ENSDARG00000113833	CABZ01112461.1	9.3446	8.70604	19.3876	0.491583	0.847401	0.136043	ENSDARG00000113833	CABZ01112461.1	18:47522972-47533692	EGFP	SATB2	OK	12.4794	0.491676	-4.6657	-3.11245	0.00225	0.0491677	yes
ENSDARG00000007560	sema3bl	4.83029	1.66833	39.1635	0.831927	0.532714	0.406195	ENSDARG00000007560	sema3bl	8:26522012-26573963	EGFP	SATB2	OK	15.2207	0.590278	-4.68849	-2.94168	5e-05	0.00325273	yes
ENSDARG00000056624	vegfd	37.9849	7.10763	11.7942	0.576841	1.36066	0.156921	ENSDARG00000056624	vegfd	11:29889827-29916607	EGFP	SATB2	OK	18.9622	0.698142	-4.76347	-3.42406	0.0002	0.00939378	yes
ENSDARG00000115903	KIRREL3	17.2273	9.83555	27.1334	0.353657	1.41058	0.0577125	ENSDARG00000115903	KIRREL3	18:47534180-47662696	EGFP	SATB2	OK	18.0654	0.607317	-4.89464	-3.86775	0.0001	0.00571692	yes
ENSDARG00000061288	kcnc4	1.90269	0.630876	43.9924	0.828096	0.200461	0.479516	ENSDARG00000061288	kcnc4	8:24928631-24965308	EGFP	SATB2	OK	15.5087	0.502691	-4.94726	-3.2478	0.00015	0.00775308	yes
ENSDARG00000104387	si:ch211-48m9.1	1.01519	20.0283	5.3472	0.517876	0.0587495	0.272673	ENSDARG00000104387	si:ch211-48m9.1	10:44811699-44901444	EGFP	SATB2	OK	8.7969	0.283099	-4.95762	-3.76068	5e-05	0.00325273	yes
ENSDARG00000022183	gsto1	28.4067	17.6534	42.4266	0.544243	2.05461	0.233462	ENSDARG00000022183	gsto1	13:25380431-25389051	EGFP	SATB2	OK	29.4956	0.944104	-4.96541	-3.82163	5e-05	0.00325273	yes
ENSDARG00000062165	tub	39.841	0.956659	11.3445	0.62307	0.660003	0.349196	ENSDARG00000062165	tub	7:27898090-28189681	EGFP	SATB2	OK	17.3807	0.54409	-4.9975	-2.70235	5e-05	0.00325273	yes
ENSDARG00000057751	zbtb47a	20.3533	6.76217	9.26034	0.636921	0.321292	0.177731	ENSDARG00000057751	zbtb47a	2:21309271-21321749	EGFP	SATB2	OK	12.1253	0.378648	-5.00101	-2.56929	0.0018	0.0435831	yes
ENSDARG00000100787	CR855274.1	10.0024	178.035	3.32287	2.62167	0.879433	2.0666	ENSDARG00000100787	CR855274.1	11:31047853-31055288	EGFP	SATB2	OK	63.7868	1.8559	-5.10307	-2.78492	0.00065	0.0224319	yes
ENSDARG00000102478	BX470176.1	22.2542	15.1332	23.6206	0.408454	0.995705	0.322515	ENSDARG00000102478	BX470176.1	7:57146541-57332915	EGFP	SATB2	OK	20.336	0.575558	-5.14293	-5.0976	5e-05	0.00325273	yes
ENSDARG00000056781	zanl	1.89786	30.2614	3.03175	0.494237	0.294029	0.16129	ENSDARG00000056781	zanl	7:26326461-26365420	EGFP	SATB2	OK	11.7303	0.316519	-5.21181	-4.19628	5e-05	0.00325273	yes
ENSDARG00000025465	spon2a	275.45	6.29095	49.6946	2.14155	5.68707	0.944957	ENSDARG00000025465	spon2a	14:21861098-21901815	EGFP	SATB2	OK	110.479	2.92453	-5.23942	-4.49864	5e-05	0.00325273	yes
ENSDARG00000076534	si:ch211-14a17.10	9.29283	0.0884397	12.6243	0.439347	0.11877	0.0230016	ENSDARG00000076534	si:ch211-14a17.10	2:38231694-38261272	EGFP	SATB2	OK	7.33519	0.193706	-5.24289	-1.05836	0.0001	0.00571692	yes
ENSDARG00000093415	si:dkey-21e2.12	21.5957	1.13964	24.0092	0.28337	0.213924	0.701599	ENSDARG00000093415	si:dkey-21e2.12	22:19188808-19428807	EGFP	SATB2	OK	15.5815	0.399631	-5.28502	-1.29065	0.00225	0.0491677	yes
ENSDARG00000100917	slc30a8	171.845	16.2103	235.292	3.26911	6.87834	0.262213	ENSDARG00000100917	slc30a8	19:46343384-46362232	EGFP	SATB2	OK	141.116	3.46989	-5.34585	-4.75748	5e-05	0.00325273	yes
ENSDARG00000056166	jac2	140.329	1.21748	17.688	2.30615	0.515854	0.645115	ENSDARG00000056166	jac2	7:8598994-8602864	EGFP	SATB2	OK	53.078	1.15571	-5.52127	-4.14815	5e-05	0.00325273	yes
ENSDARG00000003381	si:ch211-266g18.6	64.8017	1.02066	7.39653	0.692949	0.607364	0.238144	ENSDARG00000003381	si:ch211-266g18.6	17:15388478-15410985	EGFP	SATB2	OK	24.4063	0.512819	-5.57266	-2.51899	5e-05	0.00325273	yes
ENSDARG00000077228	ntrk3a	8.88469	16.2435	23.3111	0.247801	0.45799	0.250687	ENSDARG00000077228	ntrk3a	25:11795682-12203961	EGFP	SATB2	OK	16.1465	0.318826	-5.6623	-4.08639	5e-05	0.00325273	yes
ENSDARG00000020237	mc1r	135.101	17.1649	88.786	0.372604	3.56113	0.301394	ENSDARG00000020237	mc1r	18:31226287-31227615	EGFP	SATB2	OK	80.3508	1.41171	-5.8308	-3.72227	0.00095	0.0289462	yes
ENSDARG00000061692	yjefn3	49.6137	49.1996	117.624	1.45975	1.48413	0.499992	ENSDARG00000061692	yjefn3	22:18389270-18464654	EGFP	SATB2	OK	72.1457	1.14796	-5.97377	-4.70095	0.0002	0.00939378	yes
ENSDARG00000100442	cfh	60.0403	0.172543	4.73186	0.790281	0.0361052	0.206188	ENSDARG00000100442	cfh	22:23641800-23668468	EGFP	SATB2	OK	21.6482	0.344191	-5.9749	-3.0195	0.0001	0.00571692	yes
ENSDARG00000074715	stk17a	69.4221	6.4205	82.4127	1.46951	0.680841	0.337303	ENSDARG00000074715	stk17a	24:744712-788777	EGFP	SATB2	OK	52.7518	0.829218	-5.99132	-5.70841	5e-05	0.00325273	yes
ENSDARG00000110399	RF00004	25668.1	562.887	33052.1	403.869	186.909	272.777	ENSDARG00000110399	RF00004	7:69478913-69494504	EGFP	SATB2	OK	19761.1	287.852	-6.10119	-4.93485	5e-05	0.00325273	yes
ENSDARG00000044048	prnpb	9.39951	1.33538	55.2147	0.169661	0.515479	0.258954	ENSDARG00000044048	prnpb	10:20628697-20632779	EGFP	SATB2	OK	21.9832	0.314698	-6.12629	-4.2407	5e-05	0.00325273	yes
ENSDARG00000043002	vmo1a	0.340039	78.2824	118.485	0.971381	1.14193	0.570334	ENSDARG00000043002	vmo1a	3:5403847-5413018	EGFP	SATB2	OK	65.7026	0.894548	-6.19865	-4.68564	5e-05	0.00325273	yes
ENSDARG00000041623	mt2	1567.56	73.9473	5668.01	68.6155	24.6023	2.76471	ENSDARG00000041623	mt2	18:17534626-17535979	EGFP	SATB2	OK	2436.51	31.9942	-6.25086	-5.01224	5e-05	0.00325273	yes
ENSDARG00000077377	si:dkey-85n7.6	56.9922	16.8821	1.60684	0.238628	0.118317	0.0471638	ENSDARG00000077377	si:dkey-85n7.6	20:27240387-27283820	EGFP	SATB2	OK	25.1604	0.134703	-7.54523	-2.30562	0.00205	0.0471167	yes
ENSDARG00000055053	itih1	138.535	18.4244	11.1345	0.112137	0.277296	0.240302	ENSDARG00000055053	itih1	11:3630626-3647014	EGFP	SATB2	OK	56.0314	0.209912	-8.06031	-5.10623	0.00035	0.0147006	yes
ENSDARG00000035852	cart3	17.6421	2364.46	264.41	0.622005	3.25791	3.12243	ENSDARG00000035852	cart3	7:52962631-52963493	EGFP	SATB2	OK	882.171	2.33412	-8.56204	-4.99066	5e-05	0.00325273	yes
ENSDARG00000019228	mogat2	0.375646	0.0919407	0.751915	0	0	0	ENSDARG00000019228	mogat2	10:32534813-32610776	EGFP	SATB2	OK	0.406501	0	#NAME?	#NAME?	0.003	0.059472	no
ENSDARG00000015527	CU929145.1	1.43915	0	0.203973	0	0	0	ENSDARG00000015527	CU929145.1	24:39120724-39121900	EGFP	SATB2	OK	0.547708	0	#NAME?	#NAME?	0.00305	0.0601996	no
ENSDARG00000026338	styxl1	0.506345	0.310903	0.377116	0	0	0	ENSDARG00000026338	styxl1	10:35257650-35262368	EGFP	SATB2	OK	0.398121	0	#NAME?	#NAME?	0.00325	0.0623532	no
ENSDARG00000097268	CU929145.2	1.28004	0	0.298331	0	0	0	ENSDARG00000097268	CU929145.2	24:39117498-39118364	EGFP	SATB2	OK	0.526124	0	#NAME?	#NAME?	0.0034	0.0639839	no
ENSDARG00000077622	si:ch211-263p13.7	1.62427	0	0	0	0	0	ENSDARG00000077622	si:ch211-263p13.7	10:26813709-26822190	EGFP	SATB2	OK	0.541424	0	#NAME?	#NAME?	0.00395	0.0694286	no
ENSDARG00000094928	si:ch211-53m15.2	4.03306	0	0	0	0	0	ENSDARG00000094928	si:ch211-53m15.2	16:41135017-41136139	EGFP	SATB2	OK	1.34435	0	#NAME?	#NAME?	0.00395	0.0694286	no
ENSDARG00000096352	BX957260.1	1.31755	0	0	0	0	0	ENSDARG00000096352	BX957260.1	19:39927405-39969458	EGFP	SATB2	OK	0.439183	0	#NAME?	#NAME?	0.00395	0.0694286	no
ENSDARG00000105477	si:dkey-88n24.12	0.64348	0.557166	0.249378	0	0	0	ENSDARG00000105477	si:dkey-88n24.12	7:3922235-3927923	EGFP	SATB2	OK	0.483341	0	#NAME?	#NAME?	0.00415	0.0721596	no
ENSDARG00000093648	CR513785.1	0.913225	2.49633	0	0	0	0	ENSDARG00000093648	CR513785.1	9:44849157-44850663	EGFP	SATB2	OK	1.13652	0	#NAME?	#NAME?	0.00425	0.0734471	no
ENSDARG00000032993	ccl34b.3	0.839979	0.525871	0.691709	0	0	0	ENSDARG00000032993	ccl34b.3	24:27407954-27409599	EGFP	SATB2	OK	0.685853	0	#NAME?	#NAME?	0.0051	0.0819439	no
ENSDARG00000091978	CR450716.1	2.60527	11.4154	2.70097	0	0	0	ENSDARG00000091978	CR450716.1	18:25515892-25516631	EGFP	SATB2	OK	5.57387	0	#NAME?	#NAME?	0.0054	0.0851921	no
ENSDARG00000096259	ighv4-1	0	4.85857	0.902658	0	0	0	ENSDARG00000096259	ighv4-1	3:34115437-34115886	EGFP	SATB2	OK	1.92041	0	#NAME?	#NAME?	0.0056	0.0872529	no
ENSDARG00000087805	FP236735.1	1.25971	0.212932	0	0	0	0	ENSDARG00000087805	FP236735.1	6:30456787-30464567	EGFP	SATB2	OK	0.490879	0	#NAME?	#NAME?	0.00615	0.0928818	no
ENSDARG00000092372	BX511023.1	2.41777	0	2.27753	0	0	0	ENSDARG00000092372	BX511023.1	2:27000541-27010345	EGFP	SATB2	OK	1.5651	0	#NAME?	#NAME?	0.0067	0.0979221	no
ENSDARG00000112428	AL808129.2	1.42579	0	0.22332	0	0	0	ENSDARG00000112428	AL808129.2	8:43852742-43853846	EGFP	SATB2	OK	0.549703	0	#NAME?	#NAME?	0.0069	0.0994962	no
ENSDARG00000095793	si:dkey-85n7.8	1.24806	0.150765	0.211364	0	0	0	ENSDARG00000095793	si:dkey-85n7.8	20:27194832-27198254	EGFP	SATB2	OK	0.536731	0	#NAME?	#NAME?	0.00755	0.105705	no
ENSDARG00000099896	CR388184.1	0.674564	0.340215	0.250906	0	0	0	ENSDARG00000099896	CR388184.1	7:67730147-67731886	EGFP	SATB2	OK	0.421895	0	#NAME?	#NAME?	0.00865	0.114252	no
ENSDARG00000096634	si:ch73-94k4.1	0.988111	0	0.66801	0	0	0	ENSDARG00000096634	si:ch73-94k4.1	1:57118782-57120505	EGFP	SATB2	OK	0.55204	0	#NAME?	#NAME?	0.00905	0.117614	no
ENSDARG00000100295	ccl39.3	0	6.26842	0	0	0	0	ENSDARG00000100295	ccl39.3	25:12997640-12998202	EGFP	SATB2	OK	2.08947	0	#NAME?	#NAME?	0.0093	0.118951	no
ENSDARG00000105576	BX323060.1	2.19211	0	0	0	0	0	ENSDARG00000105576	BX323060.1	7:38104702-38109515	EGFP	SATB2	OK	0.730703	0	#NAME?	#NAME?	0.0093	0.118951	no
ENSDARG00000112708	RF00001	482.185	0	0	0	0	0	ENSDARG00000112708	RF00001	25:7133654-7133769	EGFP	SATB2	OK	160.728	0	#NAME?	#NAME?	0.0093	0.118951	no
ENSDARG00000097891	CR751227.2	0.779662	0.412661	3.25363	0	0	0	ENSDARG00000097891	CR751227.2	3:23697996-23860941	EGFP	SATB2	OK	1.48198	0	#NAME?	#NAME?	0.0097	0.122271	no
ENSDARG00000087907	ndufa4l2b	0.57772	0.965223	0.355844	0	0	0	ENSDARG00000087907	ndufa4l2b	6:59255135-59271436	EGFP	SATB2	OK	0.632929	0	#NAME?	#NAME?	0.0114	0.136264	no
ENSDARG00000105580	BX323060.2	1.75643	0.280886	0	0	0	0	ENSDARG00000105580	BX323060.2	7:38144618-38145828	EGFP	SATB2	OK	0.679104	0	#NAME?	#NAME?	0.01155	0.137188	no
ENSDARG00000099782	CR383669.2	0	4.82049	1.18936	0	0	0	ENSDARG00000099782	CR383669.2	24:27428140-27430612	EGFP	SATB2	OK	2.00328	0	#NAME?	#NAME?	0.01165	0.137797	no
ENSDARG00000095002	si:rp71-17i16.4	1.25707	0	0.217269	0	0	0	ENSDARG00000095002	si:rp71-17i16.4	23:20408226-20420243	EGFP	SATB2	OK	0.491445	0	#NAME?	#NAME?	0.01215	0.141712	no
ENSDARG00000105331	BX569779.1	1.63717	0	0	0	0	0	ENSDARG00000105331	BX569779.1	11:44750934-44756483	EGFP	SATB2	OK	0.545725	0	#NAME?	#NAME?	0.01425	0.155174	no
ENSDARG00000097410	BX548045.1	0	1.68963	0.484569	0	0	0	ENSDARG00000097410	BX548045.1	17:44355292-44409623	EGFP	SATB2	OK	0.724734	0	#NAME?	#NAME?	0.0149	0.159944	no
ENSDARG00000076512	si:ch211-265g22.4	3.68874	0	0	0	0	0	ENSDARG00000076512	si:ch211-265g22.4	2:44366971-44368824	EGFP	SATB2	OK	1.22958	0	#NAME?	#NAME?	0.0158	0.164156	no
ENSDARG00000080093	RF00001	227.435	0	0	0	0	0	ENSDARG00000080093	RF00001	18:41713075-41713190	EGFP	SATB2	OK	75.8118	0	#NAME?	#NAME?	0.0158	0.164156	no
ENSDARG00000094063	CU570972.1	2.24327	0	0	0	0	0	ENSDARG00000094063	CU570972.1	1:49699902-49715822	EGFP	SATB2	OK	0.747757	0	#NAME?	#NAME?	0.0158	0.164156	no
ENSDARG00000096477	BX571825.14	3.97353	0	0	0	0	0	ENSDARG00000096477	BX571825.14	19:23049884-23050160	EGFP	SATB2	OK	1.32451	0	#NAME?	#NAME?	0.0158	0.164156	no
ENSDARG00000104386	CU019647.1	1.71105	0	0	0	0	0	ENSDARG00000104386	CU019647.1	7:8532326-8539741	EGFP	SATB2	OK	0.570352	0	#NAME?	#NAME?	0.0158	0.164156	no
ENSDARG00000089202	nkl.3	1.30289	0	0.68021	0	0	0	ENSDARG00000089202	nkl.3	17:8879811-8886735	EGFP	SATB2	OK	0.661033	0	#NAME?	#NAME?	0.016	0.165626	no
ENSDARG00000110362	CMKLR1 (1 of many)	0.857432	0	1.01776	0	0	0	ENSDARG00000110362	CMKLR1 (1 of many)	5:20599657-20600537	EGFP	SATB2	OK	0.625065	0	#NAME?	#NAME?	0.01625	0.166388	no
ENSDARG00000115195	FO203432.1	0.832417	0	0.81902	0	0	0	ENSDARG00000115195	FO203432.1	1:59123749-59124505	EGFP	SATB2	OK	0.550479	0	#NAME?	#NAME?	0.01625	0.166388	no
ENSDARG00000100443	CR376766.2	0.662052	0.224379	0.358378	0	0	0	ENSDARG00000100443	CR376766.2	13:2352288-2352995	EGFP	SATB2	OK	0.414936	0	#NAME?	#NAME?	0.01815	0.177878	no
ENSDARG00000108301	RF00001	0	269.769	79.2346	0	0	0	ENSDARG00000108301	RF00001	19:37227909-37228025	EGFP	SATB2	OK	116.335	0	#NAME?	#NAME?	0.01885	0.181748	no
ENSDARG00000092274	si:dkey-3k20.1	0	1.37088	0.342647	0	0	0	ENSDARG00000092274	si:dkey-3k20.1	22:20720807-20747062	EGFP	SATB2	OK	0.571174	0	#NAME?	#NAME?	0.02585	0.217392	no
ENSDARG00000094935	si:dkey-58f10.11	0.175015	14.7602	20.7724	0	0	0	ENSDARG00000094935	si:dkey-58f10.11	5:38679622-38711506	EGFP	SATB2	OK	11.9025	0	#NAME?	#NAME?	0.0279	0.22745	no
ENSDARG00000095164	CU469530.1	0.457595	0	1.35934	0	0	0	ENSDARG00000095164	CU469530.1	2:27484558-27485309	EGFP	SATB2	OK	0.605644	0	#NAME?	#NAME?	0.02915	0.23352	no
ENSDARG00000100191	trgv6	2.90793	0.844104	0	0	0	0	ENSDARG00000100191	trgv6	2:31869120-31869554	EGFP	SATB2	OK	1.25068	0	#NAME?	#NAME?	0.0322	0.247194	no
ENSDARG00000058254	si:ch211-213d14.1	2.34317	0	0.578686	0	0	0	ENSDARG00000058254	si:ch211-213d14.1	15:17722053-17748319	EGFP	SATB2	OK	0.973954	0	#NAME?	#NAME?	0.036	0.262566	no
ENSDARG00000086271	acyp2	4.74522	0	2.4253	0	0	0	ENSDARG00000086271	acyp2	11:43102420-43104475	EGFP	SATB2	OK	2.39017	0	#NAME?	#NAME?	0.037	0.265856	no
ENSDARG00000101330	CR382300.3	1.63026	0	0	0	0	0	ENSDARG00000101330	CR382300.3	19:19717970-19871211	EGFP	SATB2	OK	0.54342	0	#NAME?	#NAME?	0.03965	0.274843	no
ENSDARG00000114984	si:dkey-234i14.13	0	1.98853	0.959086	0	0	0	ENSDARG00000114984	si:dkey-234i14.13	24:39684133-39686707	EGFP	SATB2	OK	0.98254	0	#NAME?	#NAME?	0.0417	0.281889	no
ENSDARG00000101464	HDGFL3	7.04869	0	13.6749	0	0	0	ENSDARG00000101464	HDGFL3	KN150039.1:78-763	EGFP	SATB2	OK	6.90787	0	#NAME?	#NAME?	0.04195	0.282482	no
ENSDARG00000095894	BX511250.1	0.54286	0.888814	0	0	0	0	ENSDARG00000095894	BX511250.1	16:31879166-31881623	EGFP	SATB2	OK	0.477225	0	#NAME?	#NAME?	0.04225	0.283239	no
ENSDARG00000102019	AL627305.3	26.339	33.7629	0	0	0	0	ENSDARG00000102019	AL627305.3	21:2141984-2142309	EGFP	SATB2	OK	20.034	0	#NAME?	#NAME?	0.04225	0.283239	no
ENSDARG00000099673	si:dkey-203a12.5	4.36086	0	1.11852	0	0	0	ENSDARG00000099673	si:dkey-203a12.5	14:15191175-15431947	EGFP	SATB2	OK	1.82646	0	#NAME?	#NAME?	0.0489	0.30573	no
ENSDARG00000038869	htr5aa	1.04578	0.15134	0	0	0	0	ENSDARG00000038869	htr5aa	2:29925560-29940519	EGFP	SATB2	OK	0.399041	0	#NAME?	#NAME?	0.0527	0.317645	no
ENSDARG00000089021	si:dkey-7f16.3	0.556512	1.08771	0	0	0	0	ENSDARG00000089021	si:dkey-7f16.3	3:37824267-38625940	EGFP	SATB2	OK	0.548074	0	#NAME?	#NAME?	0.0614	0.344324	no
ENSDARG00000098050	BX571712.3	0.26095	2.26512	0	0	0	0	ENSDARG00000098050	BX571712.3	17:31125154-31127838	EGFP	SATB2	OK	0.842024	0	#NAME?	#NAME?	0.06235	0.34767	no
ENSDARG00000109844	BX901962.2	7.02181	5.59708	1.38251	0	0	0	ENSDARG00000109844	BX901962.2	4:9603305-9637398	EGFP	SATB2	OK	4.66713	0	#NAME?	#NAME?	0.06325	0.350016	no
ENSDARG00000113396	BX548045.2	0.841337	0.775321	0	0	0	0	ENSDARG00000113396	BX548045.2	17:44355292-44409623	EGFP	SATB2	OK	0.538886	0	#NAME?	#NAME?	0.0639	0.351124	no
ENSDARG00000102029	si:dkey-183c6.7	1.24219	0.148704	0	0	0	0	ENSDARG00000102029	si:dkey-183c6.7	7:23940932-23965561	EGFP	SATB2	OK	0.463633	0	#NAME?	#NAME?	0.0737	0.372458	no
ENSDARG00000081096	RF00001	57.3403	0	0	0	0	0	ENSDARG00000081096	RF00001	8:50517781-50517903	EGFP	SATB2	OK	19.1134	0	#NAME?	#NAME?	0.0741	0.372458	no
ENSDARG00000081303	mir363	89.4874	0	0	0	0	0	ENSDARG00000081303	mir363	14:31466670-31466782	EGFP	SATB2	OK	29.8291	0	#NAME?	#NAME?	0.0741	0.372458	no
ENSDARG00000081350	dre-mir-125b-1	23.4709	0	0	0	0	0	ENSDARG00000081350	dre-mir-125b-1	15:21447655-21447800	EGFP	SATB2	OK	7.82363	0	#NAME?	#NAME?	0.0741	0.372458	no
ENSDARG00000084074	RF00001	73.1857	0	0	0	0	0	ENSDARG00000084074	RF00001	24:4059455-4059573	EGFP	SATB2	OK	24.3952	0	#NAME?	#NAME?	0.0741	0.372458	no
ENSDARG00000085955	RF00001	46.6796	0	0	0	0	0	ENSDARG00000085955	RF00001	18:39615774-39615905	EGFP	SATB2	OK	15.5599	0	#NAME?	#NAME?	0.0741	0.372458	no
ENSDARG00000090345	RF00001	40.7201	0	0	0	0	0	ENSDARG00000090345	RF00001	24:41537061-41537191	EGFP	SATB2	OK	13.5734	0	#NAME?	#NAME?	0.0741	0.372458	no
ENSDARG00000099167	RF00001	66.092	0	0	0	0	0	ENSDARG00000099167	RF00001	8:44040795-44040913	EGFP	SATB2	OK	22.0307	0	#NAME?	#NAME?	0.0741	0.372458	no
ENSDARG00000100714	RF00001	71.3123	0	0	0	0	0	ENSDARG00000100714	RF00001	25:4325615-4325731	EGFP	SATB2	OK	23.7708	0	#NAME?	#NAME?	0.0741	0.372458	no
ENSDARG00000104019	RF00001	60.691	0	0	0	0	0	ENSDARG00000104019	RF00001	2:56042511-56042630	EGFP	SATB2	OK	20.2303	0	#NAME?	#NAME?	0.0741	0.372458	no
ENSDARG00000107179	RF00001	71.1534	0	0	0	0	0	ENSDARG00000107179	RF00001	7:31485484-31485601	EGFP	SATB2	OK	23.7178	0	#NAME?	#NAME?	0.0741	0.372458	no
ENSDARG00000107631	RF00001	66.1124	0	0	0	0	0	ENSDARG00000107631	RF00001	7:62578519-62578635	EGFP	SATB2	OK	22.0375	0	#NAME?	#NAME?	0.0741	0.372458	no
ENSDARG00000107728	RF00001	70.3187	0	0	0	0	0	ENSDARG00000107728	RF00001	8:48390561-48390678	EGFP	SATB2	OK	23.4396	0	#NAME?	#NAME?	0.0741	0.372458	no
ENSDARG00000107770	RF00001	69.7295	0	0	0	0	0	ENSDARG00000107770	RF00001	19:19709926-19710042	EGFP	SATB2	OK	23.2432	0	#NAME?	#NAME?	0.0741	0.372458	no
ENSDARG00000109943	RF00001	79.1175	0	0	0	0	0	ENSDARG00000109943	RF00001	17:39531814-39531929	EGFP	SATB2	OK	26.3725	0	#NAME?	#NAME?	0.0741	0.372458	no
ENSDARG00000110084	RF00001	70.9486	0	0	0	0	0	ENSDARG00000110084	RF00001	1:13875804-13875921	EGFP	SATB2	OK	23.6495	0	#NAME?	#NAME?	0.0741	0.372458	no
ENSDARG00000110796	RF00001	70.2261	0	0	0	0	0	ENSDARG00000110796	RF00001	19:5773920-5774035	EGFP	SATB2	OK	23.4087	0	#NAME?	#NAME?	0.0741	0.372458	no
ENSDARG00000110981	RF00015	28.0736	0	0	0	0	0	ENSDARG00000110981	RF00015	17:23346237-23346378	EGFP	SATB2	OK	9.35786	0	#NAME?	#NAME?	0.0741	0.372458	no
ENSDARG00000111632	RF00001	54.6357	0	0	0	0	0	ENSDARG00000111632	RF00001	18:37458445-37458562	EGFP	SATB2	OK	18.2119	0	#NAME?	#NAME?	0.0741	0.372458	no
ENSDARG00000111777	RF00026	124.355	0	0	0	0	0	ENSDARG00000111777	RF00026	4:64702880-64702987	EGFP	SATB2	OK	41.4517	0	#NAME?	#NAME?	0.0741	0.372458	no
ENSDARG00000112886	RF00001	83.0142	0	0	0	0	0	ENSDARG00000112886	RF00001	6:4658944-4659059	EGFP	SATB2	OK	27.6714	0	#NAME?	#NAME?	0.0741	0.372458	no
ENSDARG00000113950	RF00026	124.162	0	0	0	0	0	ENSDARG00000113950	RF00026	4:32290171-32290278	EGFP	SATB2	OK	41.3874	0	#NAME?	#NAME?	0.0741	0.372458	no
ENSDARG00000114000	RF00001	74.7013	0	0	0	0	0	ENSDARG00000114000	RF00001	5:4942597-4942712	EGFP	SATB2	OK	24.9004	0	#NAME?	#NAME?	0.0741	0.372458	no
ENSDARG00000114096	RF00001	80.7669	0	0	0	0	0	ENSDARG00000114096	RF00001	1:23751098-23751213	EGFP	SATB2	OK	26.9223	0	#NAME?	#NAME?	0.0741	0.372458	no
ENSDARG00000114259	RF00001	74.7023	0	0	0	0	0	ENSDARG00000114259	RF00001	8:47275295-47275410	EGFP	SATB2	OK	24.9008	0	#NAME?	#NAME?	0.0741	0.372458	no
ENSDARG00000115983	RF00001	73.0233	0	0	0	0	0	ENSDARG00000115983	RF00001	8:10052018-10052133	EGFP	SATB2	OK	24.3411	0	#NAME?	#NAME?	0.0741	0.372458	no
ENSDARG00000116013	RF00020	67.0934	0	0	0	0	0	ENSDARG00000116013	RF00020	5:43216144-43216260	EGFP	SATB2	OK	22.3645	0	#NAME?	#NAME?	0.0741	0.372458	no
ENSDARG00000116228	RF00001	74.7332	0	0	0	0	0	ENSDARG00000116228	RF00001	1:12735919-12736034	EGFP	SATB2	OK	24.9111	0	#NAME?	#NAME?	0.0741	0.372458	no
ENSDARG00000116547	RF00001	83.4959	0	0	0	0	0	ENSDARG00000116547	RF00001	5:27094223-27094338	EGFP	SATB2	OK	27.832	0	#NAME?	#NAME?	0.0741	0.372458	no
ENSDARG00000082173	dre-let-7a-6	0	0	47.803	0	0	0	ENSDARG00000082173	dre-let-7a-6	6:54506457-54506586	EGFP	SATB2	OK	15.9343	0	#NAME?	#NAME?	0.07535	0.373124	no
ENSDARG00000085040	RF00001	0	0	72.2453	0	0	0	ENSDARG00000085040	RF00001	14:52049157-52049274	EGFP	SATB2	OK	24.0818	0	#NAME?	#NAME?	0.07535	0.373124	no
ENSDARG00000096323	BX571681.4	0	0	51.6474	0	0	0	ENSDARG00000096323	BX571681.4	18:18910365-18911261	EGFP	SATB2	OK	17.2158	0	#NAME?	#NAME?	0.07535	0.373124	no
ENSDARG00000099467	RF00026	0	0	138.596	0	0	0	ENSDARG00000099467	RF00026	4:42440106-42440212	EGFP	SATB2	OK	46.1987	0	#NAME?	#NAME?	0.07535	0.373124	no
ENSDARG00000109266	RF00001	0	0	82.9053	0	0	0	ENSDARG00000109266	RF00001	12:21794001-21794116	EGFP	SATB2	OK	27.6351	0	#NAME?	#NAME?	0.07535	0.373124	no
ENSDARG00000109845	RF00020	0	0	91.4912	0	0	0	ENSDARG00000109845	RF00020	5:43120170-43120286	EGFP	SATB2	OK	30.4971	0	#NAME?	#NAME?	0.07535	0.373124	no
ENSDARG00000116155	RF00020	0	0	100.017	0	0	0	ENSDARG00000116155	RF00020	5:43121392-43121508	EGFP	SATB2	OK	33.339	0	#NAME?	#NAME?	0.07535	0.373124	no
ENSDARG00000116218	RF00001	0	0	55.8404	0	0	0	ENSDARG00000116218	RF00001	16:1212673-1212788	EGFP	SATB2	OK	18.6135	0	#NAME?	#NAME?	0.07535	0.373124	no
ENSDARG00000117677	CU137681.8	0	0	18.0981	0	0	0	ENSDARG00000117677	CU137681.8	17:46978854-46979490	EGFP	SATB2	OK	6.03268	0	#NAME?	#NAME?	0.07535	0.373124	no
ENSDARG00000082216	RF00001	0	71.5508	0	0	0	0	ENSDARG00000082216	RF00001	15:23378070-23378188	EGFP	SATB2	OK	23.8503	0	#NAME?	#NAME?	0.07565	0.373124	no
ENSDARG00000084043	RF00001	0	21.1905	0	0	0	0	ENSDARG00000084043	RF00001	4:23419319-23419455	EGFP	SATB2	OK	7.06348	0	#NAME?	#NAME?	0.07565	0.373124	no
ENSDARG00000084791	RF00001	0	28.7863	0	0	0	0	ENSDARG00000084791	RF00001	7:25791228-25791355	EGFP	SATB2	OK	9.59545	0	#NAME?	#NAME?	0.07565	0.373124	no
ENSDARG00000088351	RF00001	0	63.2392	0	0	0	0	ENSDARG00000088351	RF00001	3:9914271-9914389	EGFP	SATB2	OK	21.0797	0	#NAME?	#NAME?	0.07565	0.373124	no
ENSDARG00000104776	RF00001	0	31.7792	0	0	0	0	ENSDARG00000104776	RF00001	21:6523653-6523780	EGFP	SATB2	OK	10.5931	0	#NAME?	#NAME?	0.07565	0.373124	no
ENSDARG00000106436	RF00001	0	52.3321	0	0	0	0	ENSDARG00000106436	RF00001	25:22251688-22251804	EGFP	SATB2	OK	17.444	0	#NAME?	#NAME?	0.07565	0.373124	no
ENSDARG00000107556	RF00001	0	71.0446	0	0	0	0	ENSDARG00000107556	RF00001	9:28632384-28632500	EGFP	SATB2	OK	23.6815	0	#NAME?	#NAME?	0.07565	0.373124	no
ENSDARG00000107748	RF00001	0	60.2617	0	0	0	0	ENSDARG00000107748	RF00001	16:45018423-45018540	EGFP	SATB2	OK	20.0872	0	#NAME?	#NAME?	0.07565	0.373124	no
ENSDARG00000111412	RF00001	0	74.3927	0	0	0	0	ENSDARG00000111412	RF00001	23:43530600-43530715	EGFP	SATB2	OK	24.7976	0	#NAME?	#NAME?	0.07565	0.373124	no
ENSDARG00000112488	RF00001	0	74.8982	0	0	0	0	ENSDARG00000112488	RF00001	17:48162950-48163065	EGFP	SATB2	OK	24.9661	0	#NAME?	#NAME?	0.07565	0.373124	no
ENSDARG00000113203	RF00001	0	81.8206	0	0	0	0	ENSDARG00000113203	RF00001	23:15107847-15107962	EGFP	SATB2	OK	27.2735	0	#NAME?	#NAME?	0.07565	0.373124	no
ENSDARG00000113353	RF00001	0	51.2472	0	0	0	0	ENSDARG00000113353	RF00001	23:36959790-36959912	EGFP	SATB2	OK	17.0824	0	#NAME?	#NAME?	0.07565	0.373124	no
ENSDARG00000114445	RF00001	0	69.2599	0	0	0	0	ENSDARG00000114445	RF00001	24:4318178-4318293	EGFP	SATB2	OK	23.0866	0	#NAME?	#NAME?	0.07565	0.373124	no
ENSDARG00000114548	RF00026	0	92.9176	0	0	0	0	ENSDARG00000114548	RF00026	4:31198099-31198206	EGFP	SATB2	OK	30.9725	0	#NAME?	#NAME?	0.07565	0.373124	no
ENSDARG00000115310	RF00001	0	76.7847	0	0	0	0	ENSDARG00000115310	RF00001	KN149826.1:35564-35679	EGFP	SATB2	OK	25.5949	0	#NAME?	#NAME?	0.07565	0.373124	no
ENSDARG00000117122	RF00001	0	62.9613	0	0	0	0	ENSDARG00000117122	RF00001	7:71908213-71908328	EGFP	SATB2	OK	20.9871	0	#NAME?	#NAME?	0.07565	0.373124	no
ENSDARG00000097183	CU570976.1	1.3446	0.330357	1.05452	0	0	0	ENSDARG00000097183	CU570976.1	6:32326073-32507298	EGFP	SATB2	OK	0.909825	0	#NAME?	#NAME?	0.07635	0.374618	no
ENSDARG00000110426	BX901962.3	0.214389	0.484838	0.946666	0	0	0	ENSDARG00000110426	BX901962.3	4:9603305-9637398	EGFP	SATB2	OK	0.548631	0	#NAME?	#NAME?	0.0769	0.37585	no
ENSDARG00000082842	RF00020	0	0	238.028	0	0	0	ENSDARG00000082842	RF00020	20:48611194-48611310	EGFP	SATB2	OK	79.3428	0	#NAME?	#NAME?	0.0782	0.379338	no
ENSDARG00000100943	RF00001	0	0	54.3318	0	0	0	ENSDARG00000100943	RF00001	7:53641041-53641178	EGFP	SATB2	OK	18.1106	0	#NAME?	#NAME?	0.0782	0.379338	no
ENSDARG00000096289	ighv4-8	0	1.2575	3.76107	0	0	0	ENSDARG00000096289	ighv4-8	3:33963246-34095221	EGFP	SATB2	OK	1.67286	0	#NAME?	#NAME?	0.07955	0.383096	no
ENSDARG00000083682	RF00001	0	57.0073	0	0	0	0	ENSDARG00000083682	RF00001	24:39726845-39726978	EGFP	SATB2	OK	19.0024	0	#NAME?	#NAME?	0.0843	0.392527	no
ENSDARG00000085174	RF00004	0	32.7387	0	0	0	0	ENSDARG00000085174	RF00004	2:14767476-14767626	EGFP	SATB2	OK	10.9129	0	#NAME?	#NAME?	0.0843	0.392527	no
ENSDARG00000080448	RF00003	11.3588	0	0	0	0	0	ENSDARG00000080448	RF00003	8:4705664-4705828	EGFP	SATB2	OK	3.78627	0	#NAME?	#NAME?	0.08455	0.392883	no
ENSDARG00000084399	RF00001	103.359	0	0	0	0	0	ENSDARG00000084399	RF00001	9:55231077-55231198	EGFP	SATB2	OK	34.4531	0	#NAME?	#NAME?	0.08455	0.392883	no
ENSDARG00000085449	RF00001	140.439	0	0	0	0	0	ENSDARG00000085449	RF00001	22:22840557-22840675	EGFP	SATB2	OK	46.813	0	#NAME?	#NAME?	0.08455	0.392883	no
ENSDARG00000096609	BX465225.1	6.1291	0	0	0	0	0	ENSDARG00000096609	BX465225.1	20:14454907-14455626	EGFP	SATB2	OK	2.04303	0	#NAME?	#NAME?	0.08455	0.392883	no
ENSDARG00000096408	ighv11-2	0	2.1501	4.14741	0	0	0	ENSDARG00000096408	ighv11-2	3:33963246-34095221	EGFP	SATB2	OK	2.09917	0	#NAME?	#NAME?	0.08475	0.39357	no
ENSDARG00000108241	RF00001	140.287	69.7807	123.937	0	0	0	ENSDARG00000108241	RF00001	14:40745832-40850481	EGFP	SATB2	OK	111.335	0	#NAME?	#NAME?	0.086	0.39669	no
ENSDARG00000093030	BX950184.1	1.23234	3.42208	0	0	0	0	ENSDARG00000093030	BX950184.1	13:28276897-28417158	EGFP	SATB2	OK	1.55148	0	#NAME?	#NAME?	0.0923	0.410607	no
ENSDARG00000112855	CT033790.2	0.195815	0.876279	1.3533	0	0	0	ENSDARG00000112855	CT033790.2	11:4293287-4302567	EGFP	SATB2	OK	0.808464	0	#NAME?	#NAME?	0.0956	0.418705	no
ENSDARG00000117744	LO018324.1	0	18.9354	0.450208	0	0	0	ENSDARG00000117744	LO018324.1	7:11656566-11664988	EGFP	SATB2	OK	6.46186	0	#NAME?	#NAME?	0.0972	0.422606	no
ENSDARG00000104270	si:dkey-56m15.7	1.91491	2.53031	1.46392	0	0	0	ENSDARG00000104270	si:dkey-56m15.7	4:54862024-55069079	EGFP	SATB2	OK	1.96972	0	#NAME?	#NAME?	0.09815	0.425293	no
ENSDARG00000055656	pdzd3b	3.51715	0	0.0515036	0	0	0	ENSDARG00000055656	pdzd3b	5:30680803-30697908	EGFP	SATB2	OK	1.18955	0	#NAME?	#NAME?	0.10215	0.433328	no
ENSDARG00000089879	soul5l	1.03687	0	0.213333	0	0	0	ENSDARG00000089879	soul5l	1:59154520-59158077	EGFP	SATB2	OK	0.416735	0	#NAME?	#NAME?	0.1022	0.433328	no
ENSDARG00000094739	BX530079.1	15.8084	0	0	0	0	0	ENSDARG00000094739	BX530079.1	13:25443983-25444523	EGFP	SATB2	OK	5.26947	0	#NAME?	#NAME?	0.10305	0.435008	no
ENSDARG00000079332	AL928650.1	0	0.175769	1.97427	0	0	0	ENSDARG00000079332	AL928650.1	1:8615534-8625266	EGFP	SATB2	OK	0.71668	0	#NAME?	#NAME?	0.10425	0.437382	no
ENSDARG00000076983	rnasel4	0.277759	1.50266	0	0	0	0	ENSDARG00000076983	rnasel4	22:6254193-6258740	EGFP	SATB2	OK	0.593473	0	#NAME?	#NAME?	0.10565	0.440805	no
ENSDARG00000094509	CR354538.1	4.58696	0	0	0	0	0	ENSDARG00000094509	CR354538.1	2:39926960-40026622	EGFP	SATB2	OK	1.52899	0	#NAME?	#NAME?	0.10905	0.447974	no
ENSDARG00000117222	BX088525.2	1.8274	0	0.772285	0	0	0	ENSDARG00000117222	BX088525.2	10:33361019-33364108	EGFP	SATB2	OK	0.866562	0	#NAME?	#NAME?	0.10915	0.448141	no
ENSDARG00000020741	fga	1.41347	0	0	0	0	0	ENSDARG00000020741	fga	1:10063500-10071539	EGFP	SATB2	OK	0.471155	0	#NAME?	#NAME?	0.1098	0.44918	no
ENSDARG00000036457	cacng6a	1.09994	0.107701	0	0	0	0	ENSDARG00000036457	cacng6a	19:9732083-9798248	EGFP	SATB2	OK	0.402547	0	#NAME?	#NAME?	0.11005	0.449676	no
ENSDARG00000110283	BX296549.1	1.34856	0.204337	0	0	0	0	ENSDARG00000110283	BX296549.1	8:24296638-24697586	EGFP	SATB2	OK	0.517631	0	#NAME?	#NAME?	0.1114	0.45335	no
ENSDARG00000095711	BX284666.3	0	0	10.8568	0	0	0	ENSDARG00000095711	BX284666.3	2:49792507-49793317	EGFP	SATB2	OK	3.61894	0	#NAME?	#NAME?	0.11205	0.454117	no
ENSDARG00000093636	si:dkey-26i13.5	1.24272	0.900492	0	0	0	0	ENSDARG00000093636	si:dkey-26i13.5	1:11615272-11616295	EGFP	SATB2	OK	0.714406	0	#NAME?	#NAME?	0.1123	0.454682	no
ENSDARG00000037411	npy1r	1.21088	0	0.123283	0	0	0	ENSDARG00000037411	npy1r	1:21242835-21297748	EGFP	SATB2	OK	0.44472	0	#NAME?	#NAME?	0.11495	0.460838	no
ENSDARG00000092527	BX663522.1	0.857419	1.27257	1.61313	0	0	0	ENSDARG00000092527	BX663522.1	18:22793464-22975655	EGFP	SATB2	OK	1.24771	0	#NAME?	#NAME?	0.11495	0.460838	no
ENSDARG00000117314	AL954703.1	4.74337	0	0	0	0	0	ENSDARG00000117314	AL954703.1	1:9308270-9321931	EGFP	SATB2	OK	1.58112	0	#NAME?	#NAME?	0.1157	0.462371	no
ENSDARG00000096424	ighv2-2	0	0	7.21591	0	0	0	ENSDARG00000096424	ighv2-2	3:33963246-34095221	EGFP	SATB2	OK	2.4053	0	#NAME?	#NAME?	0.11715	0.465082	no
ENSDARG00000100045	pimr184	1.61538	0	0	0	0	0	ENSDARG00000100045	pimr184	8:48768872-48770603	EGFP	SATB2	OK	0.53846	0	#NAME?	#NAME?	0.11745	0.465584	no
ENSDARG00000003797	asb2a.1	3.91258	1.19389	0	0	0	0	ENSDARG00000003797	asb2a.1	20:27295700-27381691	EGFP	SATB2	OK	1.70215	0	#NAME?	#NAME?	0.11815	0.466318	no
ENSDARG00000025311	cuzd1.2	1.65731	0	0	0	0	0	ENSDARG00000025311	cuzd1.2	17:21833718-21859164	EGFP	SATB2	OK	0.552437	0	#NAME?	#NAME?	0.11815	0.466318	no
ENSDARG00000096822	CR847898.1	0.709439	0	1.6746	0	0	0	ENSDARG00000096822	CR847898.1	6:29821616-29831200	EGFP	SATB2	OK	0.794679	0	#NAME?	#NAME?	0.1185	0.466966	no
ENSDARG00000102456	cfhl4	1.70094	0	0	0	0	0	ENSDARG00000102456	cfhl4	22:23598035-23625372	EGFP	SATB2	OK	0.56698	0	#NAME?	#NAME?	0.12125	0.472978	no
ENSDARG00000077626	fam19a4a	1.38682	1.52611	0	0	0	0	ENSDARG00000077626	fam19a4a	23:18134312-18145233	EGFP	SATB2	OK	0.970978	0	#NAME?	#NAME?	0.12145	0.473074	no
ENSDARG00000030980	csrp1b	0.276874	1.38797	0	0	0	0	ENSDARG00000030980	csrp1b	6:54838268-54845622	EGFP	SATB2	OK	0.554949	0	#NAME?	#NAME?	0.1218	0.473442	no
ENSDARG00000081423	dre-mir-124-3	69.6151	0	0	0	0	0	ENSDARG00000081423	dre-mir-124-3	24:24416874-24503022	EGFP	SATB2	OK	23.205	0	#NAME?	#NAME?	0.1223	0.474345	no
ENSDARG00000092697	pimr200	0	4.10564	0	0	0	0	ENSDARG00000092697	pimr200	5:39981478-39987192	EGFP	SATB2	OK	1.36855	0	#NAME?	#NAME?	0.1224	0.47457	no
ENSDARG00000102496	CR847898.4	1.42619	0	0.540543	0	0	0	ENSDARG00000102496	CR847898.4	6:29821616-29831200	EGFP	SATB2	OK	0.655579	0	#NAME?	#NAME?	0.12295	0.47605	no
ENSDARG00000092472	AL953896.1	0.580415	0	0.879925	0	0	0	ENSDARG00000092472	AL953896.1	2:39028336-39046184	EGFP	SATB2	OK	0.48678	0	#NAME?	#NAME?	0.12425	0.47814	no
ENSDARG00000104002	ccl39.4	1.24238	1.05575	0	0	0	0	ENSDARG00000104002	ccl39.4	25:12995856-12996439	EGFP	SATB2	OK	0.766043	0	#NAME?	#NAME?	0.125	0.479439	no
ENSDARG00000112334	RF00001	71.2322	67.1747	0	0	0	0	ENSDARG00000112334	RF00001	13:11974451-11974568	EGFP	SATB2	OK	46.1356	0	#NAME?	#NAME?	0.125	0.479439	no
ENSDARG00000040321	rx2	1.46273	0	0	0	0	0	ENSDARG00000040321	rx2	2:55833424-55861351	EGFP	SATB2	OK	0.487578	0	#NAME?	#NAME?	0.12515	0.479439	no
ENSDARG00000088322	mir1-1	135.289	0	0	0	0	0	ENSDARG00000088322	mir1-1	23:7171652-7217479	EGFP	SATB2	OK	45.0962	0	#NAME?	#NAME?	0.12525	0.479439	no
ENSDARG00000069089	agrp	4.13533	0	0	0	0	0	ENSDARG00000069089	agrp	7:35080489-35083585	EGFP	SATB2	OK	1.37844	0	#NAME?	#NAME?	0.1253	0.479439	no
ENSDARG00000105419	CR318599.3	0.128665	0.894632	0.138487	0	0	0	ENSDARG00000105419	CR318599.3	7:4624925-4923974	EGFP	SATB2	OK	0.387261	0	#NAME?	#NAME?	0.12535	0.479439	no
ENSDARG00000105764	CR354581.1	0	0.971132	0.870347	0	0	0	ENSDARG00000105764	CR354581.1	7:48219330-48225410	EGFP	SATB2	OK	0.613826	0	#NAME?	#NAME?	0.1256	0.47999	no
ENSDARG00000107839	RF00001	0	72.3593	77.7674	0	0	0	ENSDARG00000107839	RF00001	21:11252510-11252626	EGFP	SATB2	OK	50.0423	0	#NAME?	#NAME?	0.1256	0.47999	no
ENSDARG00000116628	BX908782.3	6.06338	26.7037	1.36949	0	0	0	ENSDARG00000116628	BX908782.3	2:51783119-51815413	EGFP	SATB2	OK	11.3789	0	#NAME?	#NAME?	0.12645	0.481397	no
ENSDARG00000098669	exd1	2.01107	0	0	0	0	0	ENSDARG00000098669	exd1	17:53324005-53329704	EGFP	SATB2	OK	0.670355	0	#NAME?	#NAME?	0.12695	0.482623	no
ENSDARG00000011283	si:dkey-110k5.10	2.04866	0	0	0	0	0	ENSDARG00000011283	si:dkey-110k5.10	5:23721514-23729590	EGFP	SATB2	OK	0.682886	0	#NAME?	#NAME?	0.1274	0.483198	no
ENSDARG00000100086	adipoqb	1.34177	0	0	0	0	0	ENSDARG00000100086	adipoqb	2:4490603-4496358	EGFP	SATB2	OK	0.447256	0	#NAME?	#NAME?	0.12785	0.484013	no
ENSDARG00000110456	RF00001	0	79.1181	0	0	0	0	ENSDARG00000110456	RF00001	17:262802-277046	EGFP	SATB2	OK	26.3727	0	#NAME?	#NAME?	0.12855	0.48585	no
ENSDARG00000109198	RF00001	62.8009	0	0	0	0	0	ENSDARG00000109198	RF00001	18:1447839-1559823	EGFP	SATB2	OK	20.9336	0	#NAME?	#NAME?	0.12975	0.488292	no
ENSDARG00000053130	pcp4a	0.412046	0.675652	0.218925	0	0	0	ENSDARG00000053130	pcp4a	10:38775407-39011514	EGFP	SATB2	OK	0.435541	0	#NAME?	#NAME?	0.13	0.488476	no
ENSDARG00000096255	ighv8-1	4.22485	0.838773	0	0	0	0	ENSDARG00000096255	ighv8-1	3:33963246-34095221	EGFP	SATB2	OK	1.68787	0	#NAME?	#NAME?	0.1309	0.490555	no
ENSDARG00000096418	ighv14-1	0	2.23031	0	0	0	0	ENSDARG00000096418	ighv14-1	3:33963246-34095221	EGFP	SATB2	OK	0.743438	0	#NAME?	#NAME?	0.13955	0.508003	no
ENSDARG00000020866	apoa4b.2	1.18907	0	0	0	0	0	ENSDARG00000020866	apoa4b.2	16:23837846-23977525	EGFP	SATB2	OK	0.396356	0	#NAME?	#NAME?	0.14025	0.508933	no
ENSDARG00000115014	RF00001	0	63.7161	0	0	0	0	ENSDARG00000115014	RF00001	5:20319518-20419863	EGFP	SATB2	OK	21.2387	0	#NAME?	#NAME?	0.1408	0.509522	no
ENSDARG00000113082	RF00001	66.8097	0	0	0	0	0	ENSDARG00000113082	RF00001	25:418931-554142	EGFP	SATB2	OK	22.2699	0	#NAME?	#NAME?	0.14235	0.51129	no
ENSDARG00000105852	RF00001	76.5405	0	0	0	0	0	ENSDARG00000105852	RF00001	9:40081523-40350169	EGFP	SATB2	OK	25.5135	0	#NAME?	#NAME?	0.1442	0.513535	no
ENSDARG00000096709	BX255913.1	5.1027	0.912638	0	0	0	0	ENSDARG00000096709	BX255913.1	20:27295700-27381691	EGFP	SATB2	OK	2.00511	0	#NAME?	#NAME?	0.14605	0.515984	no
ENSDARG00000100627	CR354537.1	2.50185	0.87818	0.399514	0	0	0	ENSDARG00000100627	CR354537.1	23:14265121-14403939	EGFP	SATB2	OK	1.25985	0	#NAME?	#NAME?	0.1547	0.52713	no
ENSDARG00000093902	CU694380.1	1.17756	0.614804	0	0	0	0	ENSDARG00000093902	CU694380.1	8:36528232-36541856	EGFP	SATB2	OK	0.597456	0	#NAME?	#NAME?	0.1552	0.527519	no
ENSDARG00000000175	hoxb2a	0.0657228	0.0806369	0.903762	0	0	0	ENSDARG00000000175	hoxb2a	3:23697996-23860941	EGFP	SATB2	OK	0.350041	0	#NAME?	#NAME?	0.156	0.528854	no
ENSDARG00000099065	BX323051.1	4.26169	0.89905	0	0	0	0	ENSDARG00000099065	BX323051.1	7:47226091-47266151	EGFP	SATB2	OK	1.72025	0	#NAME?	#NAME?	0.1586	0.532248	no
ENSDARG00000096293	BX649612.1	2.03432	0	0	0	0	0	ENSDARG00000096293	BX649612.1	18:18087259-18249698	EGFP	SATB2	OK	0.678107	0	#NAME?	#NAME?	0.1587	0.532347	no
ENSDARG00000097678	CR450824.1	2.17335	0	0	0	0	0	ENSDARG00000097678	CR450824.1	23:6635171-6661450	EGFP	SATB2	OK	0.724449	0	#NAME?	#NAME?	0.15945	0.533084	no
ENSDARG00000099571	CU468012.2	0	21.5628	0	0	0	0	ENSDARG00000099571	CU468012.2	4:70712806-71124547	EGFP	SATB2	OK	7.18759	0	#NAME?	#NAME?	0.16105	0.535076	no
ENSDARG00000093306	CT025585.1	0.955034	0.929286	0	0	0	0	ENSDARG00000093306	CT025585.1	23:28391106-28423222	EGFP	SATB2	OK	0.628107	0	#NAME?	#NAME?	0.1649	0.54151	no
ENSDARG00000084789	RF00001	0	0	67.0781	0	0	0	ENSDARG00000084789	RF00001	24:23241443-23323526	EGFP	SATB2	OK	22.3594	0	#NAME?	#NAME?	0.16865	0.544893	no
ENSDARG00000112997	RF00001	68.5431	0	0	0	0	0	ENSDARG00000112997	RF00001	1:57132139-57238464	EGFP	SATB2	OK	22.8477	0	#NAME?	#NAME?	0.17115	0.547192	no
ENSDARG00000110403	CR388363.3	0	0.981157	0.208971	0	0	0	ENSDARG00000110403	CR388363.3	4:60760282-60790123	EGFP	SATB2	OK	0.396709	0	#NAME?	#NAME?	0.177	0.555083	no
ENSDARG00000071446	zgc:153659	0	6.83982	0	0	0	0	ENSDARG00000071446	zgc:153659	24:39688071-39698825	EGFP	SATB2	OK	2.27994	0	#NAME?	#NAME?	0.17765	0.555884	no
ENSDARG00000108746	RF00001	73.4763	0	0	0	0	0	ENSDARG00000108746	RF00001	5:23622176-23675222	EGFP	SATB2	OK	24.4921	0	#NAME?	#NAME?	0.1795	0.557588	no
ENSDARG00000113043	RF00001	0	81.0537	0	0	0	0	ENSDARG00000113043	RF00001	7:10895882-11020900	EGFP	SATB2	OK	27.0179	0	#NAME?	#NAME?	0.1796	0.557593	no
ENSDARG00000085149	RF00001	0	56.0288	0	0	0	0	ENSDARG00000085149	RF00001	23:26543715-26725637	EGFP	SATB2	OK	18.6763	0	#NAME?	#NAME?	0.1828	0.561064	no
ENSDARG00000083084	RF00001	0	39.6895	0	0	0	0	ENSDARG00000083084	RF00001	21:35382442-35534401	EGFP	SATB2	OK	13.2298	0	#NAME?	#NAME?	0.18585	0.564987	no
ENSDARG00000097438	BX510360.1	11.5169	0	4.76576	0	0	0	ENSDARG00000097438	BX510360.1	2:30116485-30135446	EGFP	SATB2	OK	5.42757	0	#NAME?	#NAME?	0.18595	0.565063	no
ENSDARG00000113260	RF00001	59.955	0	0	0	0	0	ENSDARG00000113260	RF00001	7:50641918-50764714	EGFP	SATB2	OK	19.985	0	#NAME?	#NAME?	0.18605	0.565291	no
ENSDARG00000102694	CU570769.2	0.848072	0.408121	2.38386	0	0	0	ENSDARG00000102694	CU570769.2	22:1249787-1267301	EGFP	SATB2	OK	1.21335	0	#NAME?	#NAME?	0.18695	0.566429	no
ENSDARG00000107017	RF00001	69.7388	0	0	0	0	0	ENSDARG00000107017	RF00001	6:52947185-53036902	EGFP	SATB2	OK	23.2463	0	#NAME?	#NAME?	0.1874	0.566958	no
ENSDARG00000084912	RF00001	49.7123	0	0	0	0	0	ENSDARG00000084912	RF00001	2:11216813-11468654	EGFP	SATB2	OK	16.5708	0	#NAME?	#NAME?	0.1885	0.568085	no
ENSDARG00000106746	RF00001	66.2439	0	0	0	0	0	ENSDARG00000106746	RF00001	2:41162102-41447837	EGFP	SATB2	OK	22.0813	0	#NAME?	#NAME?	0.18975	0.569119	no
ENSDARG00000096698	BX119915.1	5.70477	126.149	0	0	0	0	ENSDARG00000096698	BX119915.1	20:39489930-39498164	EGFP	SATB2	OK	43.9514	0	#NAME?	#NAME?	0.19005	0.569119	no
ENSDARG00000103254	si:dkeyp-80d11.4	1.03656	0.146437	0	0	0	0	ENSDARG00000103254	si:dkeyp-80d11.4	4:70712806-71124547	EGFP	SATB2	OK	0.394334	0	#NAME?	#NAME?	0.19005	0.569119	no
ENSDARG00000080804	RF00001	188.569	0	0	0	0	0	ENSDARG00000080804	RF00001	19:30517310-30565122	EGFP	SATB2	OK	62.8562	0	#NAME?	#NAME?	0.19095	0.570306	no
ENSDARG00000112899	RF00001	0	0	85.0936	0	0	0	ENSDARG00000112899	RF00001	7:59677272-59719911	EGFP	SATB2	OK	28.3645	0	#NAME?	#NAME?	0.19105	0.570529	no
ENSDARG00000106113	RF00001	69.3345	0	0	0	0	0	ENSDARG00000106113	RF00001	19:8816656-8880688	EGFP	SATB2	OK	23.1115	0	#NAME?	#NAME?	0.19185	0.571411	no
ENSDARG00000080246	RF00001	71.4215	0	0	0	0	0	ENSDARG00000080246	RF00001	8:30159328-30316436	EGFP	SATB2	OK	23.8072	0	#NAME?	#NAME?	0.1922	0.571626	no
ENSDARG00000104383	RF00001	59.2669	43.2343	0	0	0	0	ENSDARG00000104383	RF00001	18:44053051-44129151	EGFP	SATB2	OK	34.1671	0	#NAME?	#NAME?	0.1933	0.57294	no
ENSDARG00000113491	RF00001	0	72.6887	0	0	0	0	ENSDARG00000113491	RF00001	1:45754867-45836167	EGFP	SATB2	OK	24.2296	0	#NAME?	#NAME?	0.1937	0.573669	no
ENSDARG00000096044	BX548032.2	5.91502	0	0	0	0	0	ENSDARG00000096044	BX548032.2	1:51753124-51826020	EGFP	SATB2	OK	1.97167	0	#NAME?	#NAME?	0.19435	0.574173	no
ENSDARG00000115656	RF00001	57.3091	0	0	0	0	0	ENSDARG00000115656	RF00001	23:11864222-12015139	EGFP	SATB2	OK	19.103	0	#NAME?	#NAME?	0.19455	0.57424	no
ENSDARG00000113040	RF00001	153.305	0	0	0	0	0	ENSDARG00000113040	RF00001	5:62804251-62988463	EGFP	SATB2	OK	51.1018	0	#NAME?	#NAME?	0.195	0.574515	no
ENSDARG00000100831	RF00001	39.8901	0	0	0	0	0	ENSDARG00000100831	RF00001	19:19241371-19270755	EGFP	SATB2	OK	13.2967	0	#NAME?	#NAME?	0.1954	0.574721	no
ENSDARG00000098340	RF00003	0	11.3043	0	0	0	0	ENSDARG00000098340	RF00003	4:30884011-31064584	EGFP	SATB2	OK	3.76811	0	#NAME?	#NAME?	0.1959	0.575277	no
ENSDARG00000108693	RF00001	300.4	0	76.9415	0	0	0	ENSDARG00000108693	RF00001	25:28862659-28892882	EGFP	SATB2	OK	125.78	0	#NAME?	#NAME?	0.19615	0.575277	no
ENSDARG00000080977	RF00001	75.6403	0	0	0	0	0	ENSDARG00000080977	RF00001	22:38824011-38913871	EGFP	SATB2	OK	25.2134	0	#NAME?	#NAME?	0.1962	0.575277	no
ENSDARG00000099689	si:dkey-203a12.3	11.6134	0.994736	0.511502	0	0	0	ENSDARG00000099689	si:dkey-203a12.3	14:15191175-15431947	EGFP	SATB2	OK	4.3732	0	#NAME?	#NAME?	0.19625	0.575277	no
ENSDARG00000113381	RF00001	63.1108	0	0	0	0	0	ENSDARG00000113381	RF00001	14:29200771-29760015	EGFP	SATB2	OK	21.0369	0	#NAME?	#NAME?	0.19635	0.575277	no
ENSDARG00000097460	CU929339.2	3.80424	0	0	0	0	0	ENSDARG00000097460	CU929339.2	6:57431318-57476465	EGFP	SATB2	OK	1.26808	0	#NAME?	#NAME?	0.1967	0.575856	no
ENSDARG00000083966	RF00001	0	49.521	0	0	0	0	ENSDARG00000083966	RF00001	17:11372530-11377195	EGFP	SATB2	OK	16.507	0	#NAME?	#NAME?	0.19865	0.57768	no
ENSDARG00000116800	RF00001	64.5563	0	0	0	0	0	ENSDARG00000116800	RF00001	12:1469089-1526051	EGFP	SATB2	OK	21.5188	0	#NAME?	#NAME?	0.1987	0.577751	no
ENSDARG00000081104	RF00001	0	33.5624	0	0	0	0	ENSDARG00000081104	RF00001	16:5013867-5105322	EGFP	SATB2	OK	11.1875	0	#NAME?	#NAME?	0.1993	0.578233	no
ENSDARG00000107345	RF00001	159.096	0	0	0	0	0	ENSDARG00000107345	RF00001	17:12767639-12923574	EGFP	SATB2	OK	53.0321	0	#NAME?	#NAME?	0.1994	0.578295	no
ENSDARG00000107059	RF00001	0	71.6874	0	0	0	0	ENSDARG00000107059	RF00001	13:28009726-28263868	EGFP	SATB2	OK	23.8958	0	#NAME?	#NAME?	0.19945	0.578295	no
ENSDARG00000083826	RF00417	40.9939	34.0186	0	0	0	0	ENSDARG00000083826	RF00417	21:43702009-43716471	EGFP	SATB2	OK	25.0042	0	#NAME?	#NAME?	0.1997	0.57843	no
ENSDARG00000106504	RF00001	66.0069	136.491	0	0	0	0	ENSDARG00000106504	RF00001	13:31687972-31707870	EGFP	SATB2	OK	67.4994	0	#NAME?	#NAME?	0.19985	0.578565	no
ENSDARG00000097041	BX927349.1	6.20138	1.53508	0.612353	0	0	0	ENSDARG00000097041	BX927349.1	17:43534114-43558494	EGFP	SATB2	OK	2.78294	0	#NAME?	#NAME?	0.2004	0.57905	no
ENSDARG00000096538	CU469541.1	0	2.88687	0	0	0	0	ENSDARG00000096538	CU469541.1	1:28898944-28950366	EGFP	SATB2	OK	0.962291	0	#NAME?	#NAME?	0.20065	0.579476	no
ENSDARG00000109073	RF00001	0	0	53.2423	0	0	0	ENSDARG00000109073	RF00001	12:31161563-31422536	EGFP	SATB2	OK	17.7474	0	#NAME?	#NAME?	0.20125	0.579878	no
ENSDARG00000100469	RF00001	0	0	129.785	0	0	0	ENSDARG00000100469	RF00001	KN150165.1:1366-16840	EGFP	SATB2	OK	43.2616	0	#NAME?	#NAME?	0.20185	0.580572	no
ENSDARG00000084398	RF00001	49.922	0	0	0	0	0	ENSDARG00000084398	RF00001	13:21888213-22095934	EGFP	SATB2	OK	16.6407	0	#NAME?	#NAME?	0.20195	0.580712	no
ENSDARG00000089634	dre-mir-2188	308.826	0	0	0	0	0	ENSDARG00000089634	dre-mir-2188	5:68899472-69041102	EGFP	SATB2	OK	102.942	0	#NAME?	#NAME?	0.2023	0.581054	no
ENSDARG00000108819	RF00001	75.2759	0	0	0	0	0	ENSDARG00000108819	RF00001	16:38015349-38067952	EGFP	SATB2	OK	25.092	0	#NAME?	#NAME?	0.2023	0.581054	no
ENSDARG00000094024	CR387989.1	0	0	67.4895	0	0	0	ENSDARG00000094024	CR387989.1	18:11016202-11317187	EGFP	SATB2	OK	22.4965	0	#NAME?	#NAME?	0.2031	0.581941	no
ENSDARG00000106996	RF00001	0	70.3972	0	0	0	0	ENSDARG00000106996	RF00001	19:38167467-38327733	EGFP	SATB2	OK	23.4657	0	#NAME?	#NAME?	0.2035	0.582281	no
ENSDARG00000111406	RF00001	86.0315	0	0	0	0	0	ENSDARG00000111406	RF00001	16:35661330-35776074	EGFP	SATB2	OK	28.6772	0	#NAME?	#NAME?	0.20355	0.582281	no
ENSDARG00000108209	RF00001	76.2676	74.4172	0	0	0	0	ENSDARG00000108209	RF00001	12:41420354-41468926	EGFP	SATB2	OK	50.2283	0	#NAME?	#NAME?	0.2036	0.58235	no
ENSDARG00000110123	RF00001	0	57.9041	0	0	0	0	ENSDARG00000110123	RF00001	4:53115164-53158623	EGFP	SATB2	OK	19.3014	0	#NAME?	#NAME?	0.2039	0.582374	no
ENSDARG00000107560	RF00001	0	70.1975	0	0	0	0	ENSDARG00000107560	RF00001	3:37059802-37082618	EGFP	SATB2	OK	23.3992	0	#NAME?	#NAME?	0.2043	0.582508	no
ENSDARG00000110520	RF00001	72.6171	0	0	0	0	0	ENSDARG00000110520	RF00001	23:17146314-17211806	EGFP	SATB2	OK	24.2057	0	#NAME?	#NAME?	0.20465	0.582923	no
ENSDARG00000085665	RF00001	38.5152	0	0	0	0	0	ENSDARG00000085665	RF00001	20:47927719-47984895	EGFP	SATB2	OK	12.8384	0	#NAME?	#NAME?	0.20475	0.582983	no
ENSDARG00000106269	RF00001	66.3572	0	0	0	0	0	ENSDARG00000106269	RF00001	8:29894443-29930821	EGFP	SATB2	OK	22.1191	0	#NAME?	#NAME?	0.20515	0.58332	no
ENSDARG00000104532	RF00001	0	32.8692	0	0	0	0	ENSDARG00000104532	RF00001	17:49484639-49543048	EGFP	SATB2	OK	10.9564	0	#NAME?	#NAME?	0.2055	0.583504	no
ENSDARG00000109429	RF00001	0	69.9368	0	0	0	0	ENSDARG00000109429	RF00001	24:6513842-6647275	EGFP	SATB2	OK	23.3123	0	#NAME?	#NAME?	0.20555	0.583504	no
ENSDARG00000109809	RF00001	74.0815	0	0	0	0	0	ENSDARG00000109809	RF00001	24:1673249-1837822	EGFP	SATB2	OK	24.6938	0	#NAME?	#NAME?	0.20575	0.583706	no
ENSDARG00000108447	RF00001	146.166	0	0	0	0	0	ENSDARG00000108447	RF00001	12:30458408-30540755	EGFP	SATB2	OK	48.7221	0	#NAME?	#NAME?	0.20605	0.584187	no
ENSDARG00000114663	RF00001	0	0	160.809	0	0	0	ENSDARG00000114663	RF00001	10:9006573-9089636	EGFP	SATB2	OK	53.603	0	#NAME?	#NAME?	0.20775	0.586221	no
ENSDARG00000101966	BX664606.2	26.4995	3.65862	0	0	0	0	ENSDARG00000101966	BX664606.2	4:70010098-70313412	EGFP	SATB2	OK	10.0527	0	#NAME?	#NAME?	0.20875	0.587578	no
ENSDARG00000106135	RF00001	77.4912	0	0	0	0	0	ENSDARG00000106135	RF00001	10:24302432-24391716	EGFP	SATB2	OK	25.8304	0	#NAME?	#NAME?	0.2091	0.587889	no
ENSDARG00000105492	si:dkey-97l20.6	1.26001	2.89296	1.24481	0	0	0	ENSDARG00000105492	si:dkey-97l20.6	20:12566100-12642685	EGFP	SATB2	OK	1.79926	0	#NAME?	#NAME?	0.20965	0.58821	no
ENSDARG00000106981	RF00001	72.1153	0	0	0	0	0	ENSDARG00000106981	RF00001	18:17660157-17704546	EGFP	SATB2	OK	24.0384	0	#NAME?	#NAME?	0.21065	0.589117	no
ENSDARG00000111597	RF00001	75.6254	0	0	0	0	0	ENSDARG00000111597	RF00001	19:38422058-38467554	EGFP	SATB2	OK	25.2085	0	#NAME?	#NAME?	0.2107	0.589179	no
ENSDARG00000110390	RF00001	150.504	0	0	0	0	0	ENSDARG00000110390	RF00001	25:28340170-28443607	EGFP	SATB2	OK	50.1682	0	#NAME?	#NAME?	0.2112	0.589854	no
ENSDARG00000115172	RF00001	60.298	0	0	0	0	0	ENSDARG00000115172	RF00001	17:28340137-28564070	EGFP	SATB2	OK	20.0993	0	#NAME?	#NAME?	0.21255	0.591126	no
ENSDARG00000108019	RF00001	0	71.5353	0	0	0	0	ENSDARG00000108019	RF00001	4:23223880-23408029	EGFP	SATB2	OK	23.8451	0	#NAME?	#NAME?	0.2133	0.591544	no
ENSDARG00000113619	RF00001	0	0	76.2557	0	0	0	ENSDARG00000113619	RF00001	8:44623539-44695260	EGFP	SATB2	OK	25.4186	0	#NAME?	#NAME?	0.2136	0.591544	no
ENSDARG00000106314	RF00001	79.4009	0	0	0	0	0	ENSDARG00000106314	RF00001	15:25910500-26089064	EGFP	SATB2	OK	26.467	0	#NAME?	#NAME?	0.21385	0.591544	no
ENSDARG00000115052	RF00001	61.2725	0	0	0	0	0	ENSDARG00000115052	RF00001	6:54805135-54826061	EGFP	SATB2	OK	20.4242	0	#NAME?	#NAME?	0.2139	0.591544	no
ENSDARG00000080449	RF00001	60.8982	0	0	0	0	0	ENSDARG00000080449	RF00001	13:26226409-26703767	EGFP	SATB2	OK	20.2994	0	#NAME?	#NAME?	0.214	0.591544	no
ENSDARG00000085780	RF00001	28.8484	0	0	0	0	0	ENSDARG00000085780	RF00001	11:19271556-19471758	EGFP	SATB2	OK	9.61615	0	#NAME?	#NAME?	0.21455	0.592197	no
ENSDARG00000084123	RF00001	42.9921	0	0	0	0	0	ENSDARG00000084123	RF00001	17:22760125-22947117	EGFP	SATB2	OK	14.3307	0	#NAME?	#NAME?	0.2148	0.592296	no
ENSDARG00000113093	RF00001	0	70.6977	0	0	0	0	ENSDARG00000113093	RF00001	5:2409553-2636078	EGFP	SATB2	OK	23.5659	0	#NAME?	#NAME?	0.2148	0.592296	no
ENSDARG00000116202	RF00001	145.674	0	0	0	0	0	ENSDARG00000116202	RF00001	7:44628680-44704910	EGFP	SATB2	OK	48.5582	0	#NAME?	#NAME?	0.21605	0.593652	no
ENSDARG00000080487	RF00001	126.526	0	0	0	0	0	ENSDARG00000080487	RF00001	2:20725683-20788698	EGFP	SATB2	OK	42.1754	0	#NAME?	#NAME?	0.21675	0.594335	no
ENSDARG00000108956	RF00001	77.5749	0	0	0	0	0	ENSDARG00000108956	RF00001	1:34593489-34685329	EGFP	SATB2	OK	25.8583	0	#NAME?	#NAME?	0.2177	0.5948	no
ENSDARG00000106217	RF00001	71.9093	0	0	0	0	0	ENSDARG00000106217	RF00001	5:32162683-32182728	EGFP	SATB2	OK	23.9698	0	#NAME?	#NAME?	0.2182	0.595232	no
ENSDARG00000081623	RF00377	127.859	0	0	0	0	0	ENSDARG00000081623	RF00377	7:24049775-24097070	EGFP	SATB2	OK	42.6198	0	#NAME?	#NAME?	0.21985	0.597076	no
ENSDARG00000108229	RF00001	61.6416	0	0	0	0	0	ENSDARG00000108229	RF00001	13:2830573-2849857	EGFP	SATB2	OK	20.5472	0	#NAME?	#NAME?	0.22	0.597076	no
ENSDARG00000082675	RF00001	56.1989	52.1438	0	0	0	0	ENSDARG00000082675	RF00001	7:52887700-52960714	EGFP	SATB2	OK	36.1142	0	#NAME?	#NAME?	0.22005	0.597076	no
ENSDARG00000081379	RF00096	0	0	55.8563	0	0	0	ENSDARG00000081379	RF00096	10:17104297-17132910	EGFP	SATB2	OK	18.6188	0	#NAME?	#NAME?	0.2202	0.597076	no
ENSDARG00000082165	RF00001	50.3652	0	0	0	0	0	ENSDARG00000082165	RF00001	14:2661645-2933266	EGFP	SATB2	OK	16.7884	0	#NAME?	#NAME?	0.2203	0.597076	no
ENSDARG00000112538	RF00001	0	67.8215	0	0	0	0	ENSDARG00000112538	RF00001	7:64378067-64589920	EGFP	SATB2	OK	22.6072	0	#NAME?	#NAME?	0.2203	0.597076	no
ENSDARG00000107092	RF00001	0	0	75.5762	0	0	0	ENSDARG00000107092	RF00001	17:30473506-30521043	EGFP	SATB2	OK	25.1921	0	#NAME?	#NAME?	0.2209	0.597891	no
ENSDARG00000084449	RF00429	0	27.4454	0	0	0	0	ENSDARG00000084449	RF00429	16:17234539-17251898	EGFP	SATB2	OK	9.14846	0	#NAME?	#NAME?	0.2216	0.598326	no
ENSDARG00000085957	RF00001	51.2579	0	0	0	0	0	ENSDARG00000085957	RF00001	18:15841448-15881931	EGFP	SATB2	OK	17.086	0	#NAME?	#NAME?	0.22175	0.598326	no
ENSDARG00000115024	RF00001	63.8603	0	0	0	0	0	ENSDARG00000115024	RF00001	7:51103231-51194430	EGFP	SATB2	OK	21.2868	0	#NAME?	#NAME?	0.2222	0.598326	no
ENSDARG00000114943	RF00001	70.7963	0	0	0	0	0	ENSDARG00000114943	RF00001	13:47007074-47178279	EGFP	SATB2	OK	23.5988	0	#NAME?	#NAME?	0.2223	0.598326	no
ENSDARG00000109870	RF00001	84.2718	0	0	0	0	0	ENSDARG00000109870	RF00001	1:55124295-55131439	EGFP	SATB2	OK	28.0906	0	#NAME?	#NAME?	0.22235	0.598326	no
ENSDARG00000113231	RF00415	36.3552	0	0	0	0	0	ENSDARG00000113231	RF00415	12:5048043-5071836	EGFP	SATB2	OK	12.1184	0	#NAME?	#NAME?	0.2227	0.598777	no
ENSDARG00000112186	RF00001	85.8279	0	0	0	0	0	ENSDARG00000112186	RF00001	7:43131217-43423919	EGFP	SATB2	OK	28.6093	0	#NAME?	#NAME?	0.22285	0.599038	no
ENSDARG00000104602	RF00001	59.0659	0	0	0	0	0	ENSDARG00000104602	RF00001	11:38614475-38876352	EGFP	SATB2	OK	19.6886	0	#NAME?	#NAME?	0.223	0.599189	no
ENSDARG00000082871	RF00015	0	48.1561	0	0	0	0	ENSDARG00000082871	RF00015	23:36497517-36592436	EGFP	SATB2	OK	16.052	0	#NAME?	#NAME?	0.22315	0.599189	no
ENSDARG00000106813	RF00001	145.356	0	0	0	0	0	ENSDARG00000106813	RF00001	8:46758263-46894362	EGFP	SATB2	OK	48.4521	0	#NAME?	#NAME?	0.2236	0.599607	no
ENSDARG00000111346	RF00001	0	68.7641	0	0	0	0	ENSDARG00000111346	RF00001	4:17886837-18202291	EGFP	SATB2	OK	22.9214	0	#NAME?	#NAME?	0.2239	0.599796	no
ENSDARG00000116480	RF00001	77.9583	0	0	0	0	0	ENSDARG00000116480	RF00001	16:23495599-23524374	EGFP	SATB2	OK	25.9861	0	#NAME?	#NAME?	0.2247	0.600376	no
ENSDARG00000108421	RF00001	0	0	66.9282	0	0	0	ENSDARG00000108421	RF00001	20:23742573-23836967	EGFP	SATB2	OK	22.3094	0	#NAME?	#NAME?	0.2259	0.601789	no
ENSDARG00000115438	RF00001	0	62.2769	0	0	0	0	ENSDARG00000115438	RF00001	24:33767770-33780387	EGFP	SATB2	OK	20.759	0	#NAME?	#NAME?	0.22595	0.601789	no
ENSDARG00000086601	dre-mir-26a-2	42.0865	0	0	0	0	0	ENSDARG00000086601	dre-mir-26a-2	2:21356241-21381406	EGFP	SATB2	OK	14.0288	0	#NAME?	#NAME?	0.2263	0.601996	no
ENSDARG00000081109	dre-mir-7b	0	0	121.554	0	0	0	ENSDARG00000081109	dre-mir-7b	5:55602719-55625247	EGFP	SATB2	OK	40.518	0	#NAME?	#NAME?	0.2266	0.602112	no
ENSDARG00000115447	RF00001	240.234	0	0	0	0	0	ENSDARG00000115447	RF00001	5:38837428-39086768	EGFP	SATB2	OK	80.078	0	#NAME?	#NAME?	0.22745	0.603026	no
ENSDARG00000080835	RF00001	138.515	0	0	0	0	0	ENSDARG00000080835	RF00001	16:12256526-12319822	EGFP	SATB2	OK	46.1717	0	#NAME?	#NAME?	0.2277	0.603195	no
ENSDARG00000110139	RF00001	0	0	82.4029	0	0	0	ENSDARG00000110139	RF00001	23:30967685-30981438	EGFP	SATB2	OK	27.4676	0	#NAME?	#NAME?	0.2278	0.603214	no
ENSDARG00000112783	RF00001	73.3573	0	0	0	0	0	ENSDARG00000112783	RF00001	1:21610470-21714025	EGFP	SATB2	OK	24.4524	0	#NAME?	#NAME?	0.2288	0.603496	no
ENSDARG00000116577	RF00001	0	0	86.0601	0	0	0	ENSDARG00000116577	RF00001	10:11767790-11788565	EGFP	SATB2	OK	28.6867	0	#NAME?	#NAME?	0.2295	0.604005	no
ENSDARG00000113083	RF00001	0	0	73.8073	0	0	0	ENSDARG00000113083	RF00001	22:39007532-39046472	EGFP	SATB2	OK	24.6024	0	#NAME?	#NAME?	0.2299	0.604285	no
ENSDARG00000115618	RF00001	0	59.1887	0	0	0	0	ENSDARG00000115618	RF00001	4:18852820-18939338	EGFP	SATB2	OK	19.7296	0	#NAME?	#NAME?	0.2299	0.604285	no
ENSDARG00000112693	RF00001	78.9645	0	0	0	0	0	ENSDARG00000112693	RF00001	1:51444548-51474974	EGFP	SATB2	OK	26.3215	0	#NAME?	#NAME?	0.23075	0.604956	no
ENSDARG00000083238	RF00001	63.4447	0	0	0	0	0	ENSDARG00000083238	RF00001	13:39236140-39271505	EGFP	SATB2	OK	21.1482	0	#NAME?	#NAME?	0.23135	0.605276	no
ENSDARG00000108287	RF00001	72.9464	0	0	0	0	0	ENSDARG00000108287	RF00001	8:9866350-9986978	EGFP	SATB2	OK	24.3155	0	#NAME?	#NAME?	0.2314	0.605276	no
ENSDARG00000116050	RF00001	0	0	41.4335	0	0	0	ENSDARG00000116050	RF00001	7:9326233-9511298	EGFP	SATB2	OK	13.8112	0	#NAME?	#NAME?	0.2314	0.605276	no
ENSDARG00000108843	RF00001	70.5983	0	0	0	0	0	ENSDARG00000108843	RF00001	18:402047-423921	EGFP	SATB2	OK	23.5328	0	#NAME?	#NAME?	0.2318	0.605413	no
ENSDARG00000115037	RF00001	150.569	0	0	0	0	0	ENSDARG00000115037	RF00001	17:15502963-15528597	EGFP	SATB2	OK	50.1896	0	#NAME?	#NAME?	0.23185	0.605474	no
ENSDARG00000084589	RF00001	73.7362	0	0	0	0	0	ENSDARG00000084589	RF00001	5:66433286-66512308	EGFP	SATB2	OK	24.5787	0	#NAME?	#NAME?	0.2322	0.605643	no
ENSDARG00000099228	RF00001	0	71.1315	0	0	0	0	ENSDARG00000099228	RF00001	10:34315718-34404768	EGFP	SATB2	OK	23.7105	0	#NAME?	#NAME?	0.2322	0.605643	no
ENSDARG00000084959	RF00001	0	0	78.4388	0	0	0	ENSDARG00000084959	RF00001	16:30621683-30655980	EGFP	SATB2	OK	26.1463	0	#NAME?	#NAME?	0.2329	0.606049	no
ENSDARG00000106039	RF00001	0	0	94.5401	0	0	0	ENSDARG00000106039	RF00001	2:16597010-16647259	EGFP	SATB2	OK	31.5134	0	#NAME?	#NAME?	0.2329	0.606049	no
ENSDARG00000081182	dre-mir-15b	82.1265	0	0	0	0	0	ENSDARG00000081182	dre-mir-15b	7:26065217-26087807	EGFP	SATB2	OK	27.3755	0	#NAME?	#NAME?	0.2344	0.607016	no
ENSDARG00000103412	RF00001	0	0	99.8623	0	0	0	ENSDARG00000103412	RF00001	12:28377744-28537615	EGFP	SATB2	OK	33.2874	0	#NAME?	#NAME?	0.2346	0.607016	no
ENSDARG00000109511	RF00001	0	0	85.4052	0	0	0	ENSDARG00000109511	RF00001	10:32898532-33156789	EGFP	SATB2	OK	28.4684	0	#NAME?	#NAME?	0.2347	0.607016	no
ENSDARG00000106712	RF00001	69.6918	0	0	0	0	0	ENSDARG00000106712	RF00001	20:27295700-27381691	EGFP	SATB2	OK	23.2306	0	#NAME?	#NAME?	0.2356	0.607727	no
ENSDARG00000102054	CR848705.1	4.30076	0	0	0	0	0	ENSDARG00000102054	CR848705.1	11:11781972-11796299	EGFP	SATB2	OK	1.43359	0	#NAME?	#NAME?	0.2361	0.607849	no
ENSDARG00000084974	RF00001	0	18.4385	0	0	0	0	ENSDARG00000084974	RF00001	15:6514963-6650993	EGFP	SATB2	OK	6.14618	0	#NAME?	#NAME?	0.23655	0.607861	no
ENSDARG00000107394	RF00001	0	70.9427	0	0	0	0	ENSDARG00000107394	RF00001	15:8604476-8765029	EGFP	SATB2	OK	23.6476	0	#NAME?	#NAME?	0.2371	0.608446	no
ENSDARG00000106803	BX470232.1	0	119.606	0	0	0	0	ENSDARG00000106803	BX470232.1	7:26116102-26125092	EGFP	SATB2	OK	39.8687	0	#NAME?	#NAME?	0.2373	0.608545	no
ENSDARG00000106223	RF00001	70.1523	0	0	0	0	0	ENSDARG00000106223	RF00001	13:1726952-1786145	EGFP	SATB2	OK	23.3841	0	#NAME?	#NAME?	0.2374	0.608663	no
ENSDARG00000109981	RF00001	66.059	0	0	0	0	0	ENSDARG00000109981	RF00001	25:7784581-7866470	EGFP	SATB2	OK	22.0197	0	#NAME?	#NAME?	0.23915	0.6106	no
ENSDARG00000113247	RF00001	0	60.7764	0	0	0	0	ENSDARG00000113247	RF00001	19:47394269-47423628	EGFP	SATB2	OK	20.2588	0	#NAME?	#NAME?	0.23945	0.6106	no
ENSDARG00000111318	RF00001	0	0	72.8424	0	0	0	ENSDARG00000111318	RF00001	15:46386260-46598864	EGFP	SATB2	OK	24.2808	0	#NAME?	#NAME?	0.2396	0.610845	no
ENSDARG00000110947	RF00001	0	0	87.5208	0	0	0	ENSDARG00000110947	RF00001	1:30083577-30310689	EGFP	SATB2	OK	29.1736	0	#NAME?	#NAME?	0.2403	0.611655	no
ENSDARG00000108707	RF00001	0	0	65.5707	0	0	0	ENSDARG00000108707	RF00001	20:26572455-26624042	EGFP	SATB2	OK	21.8569	0	#NAME?	#NAME?	0.24055	0.611889	no
ENSDARG00000114054	RF00001	49.1036	0	0	0	0	0	ENSDARG00000114054	RF00001	5:11840904-11864424	EGFP	SATB2	OK	16.3679	0	#NAME?	#NAME?	0.24095	0.611923	no
ENSDARG00000093136	BX936323.1	0	0.166442	2.6442	0	0	0	ENSDARG00000093136	BX936323.1	9:22375330-22618558	EGFP	SATB2	OK	0.93688	0	#NAME?	#NAME?	0.24115	0.612029	no
ENSDARG00000081194	RF00001	251.922	0	0	0	0	0	ENSDARG00000081194	RF00001	7:27898090-28189681	EGFP	SATB2	OK	83.9741	0	#NAME?	#NAME?	0.2424	0.613008	no
ENSDARG00000085944	RF00001	63.5131	0	0	0	0	0	ENSDARG00000085944	RF00001	25:11389219-11706389	EGFP	SATB2	OK	21.171	0	#NAME?	#NAME?	0.24305	0.613082	no
ENSDARG00000083829	RF00001	40.2305	0	0	0	0	0	ENSDARG00000083829	RF00001	3:39759129-39952441	EGFP	SATB2	OK	13.4102	0	#NAME?	#NAME?	0.2444	0.613469	no
ENSDARG00000112233	RF00001	87.4604	0	0	0	0	0	ENSDARG00000112233	RF00001	7:42703717-42836480	EGFP	SATB2	OK	29.1535	0	#NAME?	#NAME?	0.2444	0.613469	no
ENSDARG00000096377	BX890590.1	2.48377	0	0	0	0	0	ENSDARG00000096377	BX890590.1	3:34919809-34981673	EGFP	SATB2	OK	0.827922	0	#NAME?	#NAME?	0.24515	0.614073	no
ENSDARG00000114644	RF00001	108.982	0	0	0	0	0	ENSDARG00000114644	RF00001	2:26060527-26156784	EGFP	SATB2	OK	36.3274	0	#NAME?	#NAME?	0.24535	0.614073	no
ENSDARG00000090367	RF00001	81.4603	0	0	0	0	0	ENSDARG00000090367	RF00001	6:50021409-50204262	EGFP	SATB2	OK	27.1534	0	#NAME?	#NAME?	0.2467	0.614558	no
ENSDARG00000117509	BX294178.3	4.05656	0	0	0	0	0	ENSDARG00000117509	BX294178.3	7:35435257-35665643	EGFP	SATB2	OK	1.35219	0	#NAME?	#NAME?	0.24705	0.614558	no
ENSDARG00000074610	si:ch211-113e8.6	2.37963	0	0.465983	0	0	0	ENSDARG00000074610	si:ch211-113e8.6	1:40181403-40208237	EGFP	SATB2	OK	0.948539	0	#NAME?	#NAME?	0.2494	0.616148	no
ENSDARG00000000474	tnni1a	0	0	0.534533	0	0	0	ENSDARG00000000474	tnni1a	23:5723089-5729484	EGFP	SATB2	NOTEST	0.178178	0	#NAME?	0	1	1	no
ENSDARG00000000638	opn1mw4	0.138831	0	0.304644	0	0	0	ENSDARG00000000638	opn1mw4	6:41200499-41202554	EGFP	SATB2	NOTEST	0.147825	0	#NAME?	0	1	1	no
ENSDARG00000001913	palmda	0.717427	0.0244702	0.0443155	0	0	0	ENSDARG00000001913	palmda	2:20406398-20428140	EGFP	SATB2	NOTEST	0.262071	0	#NAME?	0	1	1	no
ENSDARG00000002193	rho	0	0.277771	0	0	0	0	ENSDARG00000002193	rho	8:54076194-54077740	EGFP	SATB2	NOTEST	0.0925903	0	#NAME?	0	1	1	no
ENSDARG00000002330	lhx8a	0.263863	0	0.264617	0	0	0	ENSDARG00000002330	lhx8a	2:11205794-11210168	EGFP	SATB2	NOTEST	0.17616	0	#NAME?	0	1	1	no
ENSDARG00000002728	kiss1ra	0.50427	0	0	0	0	0	ENSDARG00000002728	kiss1ra	2:33796206-33821163	EGFP	SATB2	NOTEST	0.16809	0	#NAME?	0	1	1	no
ENSDARG00000002933	gbx2	0	0	0.111677	0	0	0	ENSDARG00000002933	gbx2	6:16031188-16034286	EGFP	SATB2	NOTEST	0.0372257	0	#NAME?	0	1	1	no
ENSDARG00000003090	or103-4	0.229915	0	0.303253	0	0	0	ENSDARG00000003090	or103-4	15:31438567-31445759	EGFP	SATB2	NOTEST	0.177723	0	#NAME?	0	1	1	no
ENSDARG00000003290	dab1b	0.292681	0	0	0	0	0	ENSDARG00000003290	dab1b	2:1522720-1569250	EGFP	SATB2	NOTEST	0.0975602	0	#NAME?	0	1	1	no
ENSDARG00000003395	col4a3	0.382174	0	0	0	0	0	ENSDARG00000003395	col4a3	15:35951887-36112794	EGFP	SATB2	NOTEST	0.127391	0	#NAME?	0	1	1	no
ENSDARG00000003994	syt9a	0.101469	0	0	0	0	0	ENSDARG00000003994	syt9a	18:28988372-29060842	EGFP	SATB2	NOTEST	0.0338232	0	#NAME?	0	1	1	no
ENSDARG00000004082	cx39.9	0.95569	0	0	0	0	0	ENSDARG00000004082	cx39.9	5:23622176-23675222	EGFP	SATB2	NOTEST	0.318563	0	#NAME?	0	1	1	no
ENSDARG00000004219	slc6a3	0.0673731	0	0	0	0	0	ENSDARG00000004219	slc6a3	16:248238-263658	EGFP	SATB2	NOTEST	0.0224577	0	#NAME?	0	1	1	no
ENSDARG00000004232	dlb	0.308352	0.0408741	0.0908492	0	0	0	ENSDARG00000004232	dlb	5:36693858-36701760	EGFP	SATB2	NOTEST	0.146692	0	#NAME?	0	1	1	no
ENSDARG00000004328	LIN28A	0.532658	0	0	0	0	0	ENSDARG00000004328	LIN28A	16:4654332-4707668	EGFP	SATB2	NOTEST	0.177553	0	#NAME?	0	1	1	no
ENSDARG00000004358	gnb3a	0.285681	0	0	0	0	0	ENSDARG00000004358	gnb3a	16:12022542-12049762	EGFP	SATB2	NOTEST	0.095227	0	#NAME?	0	1	1	no
ENSDARG00000004561	prkcg	0.124726	0	0	0	0	0	ENSDARG00000004561	prkcg	16:13020775-13109749	EGFP	SATB2	NOTEST	0.0415754	0	#NAME?	0	1	1	no
ENSDARG00000004643	cdhr1a	0.112785	0	0	0	0	0	ENSDARG00000004643	cdhr1a	13:29480009-29505946	EGFP	SATB2	NOTEST	0.0375949	0	#NAME?	0	1	1	no
ENSDARG00000004864	zgc:171734	0.095248	0	0	0	0	0	ENSDARG00000004864	zgc:171734	5:58665647-58684455	EGFP	SATB2	NOTEST	0.0317493	0	#NAME?	0	1	1	no
ENSDARG00000004904	gys2	0.0533136	0	0	0	0	0	ENSDARG00000004904	gys2	4:16783971-16824556	EGFP	SATB2	NOTEST	0.0177712	0	#NAME?	0	1	1	no
ENSDARG00000005485	ucmab	0.461274	0	0.277209	0	0	0	ENSDARG00000005485	ucmab	25:7982978-8030425	EGFP	SATB2	NOTEST	0.246161	0	#NAME?	0	1	1	no
ENSDARG00000005522	galr1a	1.19804	0.0804113	0	0	0	0	ENSDARG00000005522	galr1a	19:21919855-21924241	EGFP	SATB2	NOTEST	0.42615	0	#NAME?	0	1	1	no
ENSDARG00000005776	guk1b	0.326025	0	0	0	0	0	ENSDARG00000005776	guk1b	8:18230947-18239498	EGFP	SATB2	NOTEST	0.108675	0	#NAME?	0	1	1	no
ENSDARG00000005783	ncanb	0.20543	0.133356	0.0919539	0	0	0	ENSDARG00000005783	ncanb	22:17864871-18116635	EGFP	SATB2	NOTEST	0.14358	0	#NAME?	0	1	1	no
ENSDARG00000005846	SP5 (1 of many)	0.161319	0	0	0	0	0	ENSDARG00000005846	SP5 (1 of many)	6:3730842-3813374	EGFP	SATB2	NOTEST	0.053773	0	#NAME?	0	1	1	no
ENSDARG00000006206	pou4f3	0	0.19165	0	0	0	0	ENSDARG00000006206	pou4f3	9:54282493-54361357	EGFP	SATB2	NOTEST	0.0638832	0	#NAME?	0	1	1	no
ENSDARG00000006341	tas1r3	0.446872	0	0	0	0	0	ENSDARG00000006341	tas1r3	11:40731601-40742507	EGFP	SATB2	NOTEST	0.148957	0	#NAME?	0	1	1	no
ENSDARG00000006356	slc18a3a	0.10967	0	0	0	0	0	ENSDARG00000006356	slc18a3a	13:29422048-29424454	EGFP	SATB2	NOTEST	0.0365567	0	#NAME?	0	1	1	no
ENSDARG00000006568	kcnmb2	0.122208	0	0	0	0	0	ENSDARG00000006568	kcnmb2	2:7818367-7829400	EGFP	SATB2	NOTEST	0.0407359	0	#NAME?	0	1	1	no
ENSDARG00000006816	gtf2f2b	0.231796	0	0.218916	0	0	0	ENSDARG00000006816	gtf2f2b	9:18829359-18905317	EGFP	SATB2	NOTEST	0.150237	0	#NAME?	0	1	1	no
ENSDARG00000007276	ela3l	0.147037	0	0	0	0	0	ENSDARG00000007276	ela3l	5:26111595-26118855	EGFP	SATB2	NOTEST	0.0490124	0	#NAME?	0	1	1	no
ENSDARG00000007356	fgf20a	0.193126	0	0	0	0	0	ENSDARG00000007356	fgf20a	1:16393076-16394814	EGFP	SATB2	NOTEST	0.0643754	0	#NAME?	0	1	1	no
ENSDARG00000007421	ftcd	0.0648344	0	0	0	0	0	ENSDARG00000007421	ftcd	22:12770876-12786532	EGFP	SATB2	NOTEST	0.0216115	0	#NAME?	0	1	1	no
ENSDARG00000007436	avpr2aa	1.00363	0	0	0	0	0	ENSDARG00000007436	avpr2aa	23:25038994-25050521	EGFP	SATB2	NOTEST	0.334545	0	#NAME?	0	1	1	no
ENSDARG00000007655	crybb1l3	0.218508	0	0	0	0	0	ENSDARG00000007655	crybb1l3	15:28086192-28125224	EGFP	SATB2	NOTEST	0.0728362	0	#NAME?	0	1	1	no
ENSDARG00000008095	olfcd1	0.466191	0.0492823	0	0	0	0	ENSDARG00000008095	olfcd1	18:33185818-33282047	EGFP	SATB2	NOTEST	0.171824	0	#NAME?	0	1	1	no
ENSDARG00000008203	pax1a	0.189932	0	0	0	0	0	ENSDARG00000008203	pax1a	17:42274239-42278340	EGFP	SATB2	NOTEST	0.0633107	0	#NAME?	0	1	1	no
ENSDARG00000008219	crygm4	0.354159	0.413913	0	0	0	0	ENSDARG00000008219	crygm4	6:72039-72996	EGFP	SATB2	NOTEST	0.256024	0	#NAME?	0	1	1	no
ENSDARG00000008969	fgb	0.507482	0	0	0	0	0	ENSDARG00000008969	fgb	1:10051762-10059496	EGFP	SATB2	NOTEST	0.169161	0	#NAME?	0	1	1	no
ENSDARG00000009161	ftr55	0.266187	0	0	0	0	0	ENSDARG00000009161	ftr55	19:15423056-15434813	EGFP	SATB2	NOTEST	0.088729	0	#NAME?	0	1	1	no
ENSDARG00000009466	rgs9bp	0.22983	0	0	0	0	0	ENSDARG00000009466	rgs9bp	7:41303571-41312197	EGFP	SATB2	NOTEST	0.0766099	0	#NAME?	0	1	1	no
ENSDARG00000009822	her4.4	0.103867	0	0	0	0	0	ENSDARG00000009822	her4.4	23:21462020-21463788	EGFP	SATB2	NOTEST	0.0346222	0	#NAME?	0	1	1	no
ENSDARG00000010231	ppm1na	0.133331	0	0	0	0	0	ENSDARG00000010231	ppm1na	15:9053058-9069172	EGFP	SATB2	NOTEST	0.0444435	0	#NAME?	0	1	1	no
ENSDARG00000010712	npffr1l3	0.325318	0	0	0	0	0	ENSDARG00000010712	npffr1l3	10:518545-532628	EGFP	SATB2	NOTEST	0.108439	0	#NAME?	0	1	1	no
ENSDARG00000011326	ankrd45	0.786239	0	0.0765702	0	0	0	ENSDARG00000011326	ankrd45	2:35615546-35851661	EGFP	SATB2	NOTEST	0.287603	0	#NAME?	0	1	1	no
ENSDARG00000011521	upb1	0.184573	0.631832	0.231997	0	0	0	ENSDARG00000011521	upb1	8:30699428-30742233	EGFP	SATB2	NOTEST	0.349467	0	#NAME?	0	1	1	no
ENSDARG00000012539	dnase1	0.254829	0.109254	0	0	0	0	ENSDARG00000012539	dnase1	3:27778974-27784457	EGFP	SATB2	NOTEST	0.121361	0	#NAME?	0	1	1	no
ENSDARG00000013251	hsf4	0.321955	0	0.103283	0	0	0	ENSDARG00000013251	hsf4	18:22739731-22753637	EGFP	SATB2	NOTEST	0.141746	0	#NAME?	0	1	1	no
ENSDARG00000013649	casr	0.473498	0	0	0	0	0	ENSDARG00000013649	casr	5:67768161-67783593	EGFP	SATB2	NOTEST	0.157833	0	#NAME?	0	1	1	no
ENSDARG00000013855	slc12a3	0.440991	0	0	0	0	0	ENSDARG00000013855	slc12a3	18:17583478-17598755	EGFP	SATB2	NOTEST	0.146997	0	#NAME?	0	1	1	no
ENSDARG00000014169	SYT2	0	0.140718	0	0	0	0	ENSDARG00000014169	SYT2	6:55174743-55192813	EGFP	SATB2	NOTEST	0.0469059	0	#NAME?	0	1	1	no
ENSDARG00000014232	si:dkey-121j17.5	0.0512364	0	0.0547916	0	0	0	ENSDARG00000014232	si:dkey-121j17.5	20:616113-641511	EGFP	SATB2	NOTEST	0.0353427	0	#NAME?	0	1	1	no
ENSDARG00000014356	krt95	0	0.0736205	0	0	0	0	ENSDARG00000014356	krt95	11:12188119-12198914	EGFP	SATB2	NOTEST	0.0245402	0	#NAME?	0	1	1	no
ENSDARG00000014358	optc	0.206311	0.0872359	0	0	0	0	ENSDARG00000014358	optc	11:23205888-23219367	EGFP	SATB2	NOTEST	0.097849	0	#NAME?	0	1	1	no
ENSDARG00000014477	sstr3	1.06182	0	0	0	0	0	ENSDARG00000014477	sstr3	3:29600916-29602479	EGFP	SATB2	NOTEST	0.35394	0	#NAME?	0	1	1	no
ENSDARG00000014479	ptf1a	1.10197	0	0	0	0	0	ENSDARG00000014479	ptf1a	2:29710856-29711761	EGFP	SATB2	NOTEST	0.367323	0	#NAME?	0	1	1	no
ENSDARG00000014792	lrrc4bb	0.287532	0	0	0	0	0	ENSDARG00000014792	lrrc4bb	24:38369350-38384432	EGFP	SATB2	NOTEST	0.095844	0	#NAME?	0	1	1	no
ENSDARG00000014953	cnih3	0.0977953	0	0	0	0	0	ENSDARG00000014953	cnih3	20:36233872-36298140	EGFP	SATB2	NOTEST	0.0325984	0	#NAME?	0	1	1	no
ENSDARG00000014975	irge1	0.218091	0	0	0	0	0	ENSDARG00000014975	irge1	16:25975425-25978063	EGFP	SATB2	NOTEST	0.0726971	0	#NAME?	0	1	1	no
ENSDARG00000015662	pla2g12b	0.4181	0.523418	0.101103	0	0	0	ENSDARG00000015662	pla2g12b	13:4671697-4683595	EGFP	SATB2	NOTEST	0.34754	0	#NAME?	0	1	1	no
ENSDARG00000015854	chata	0.0715623	0	0	0	0	0	ENSDARG00000015854	chata	13:29406813-29421331	EGFP	SATB2	NOTEST	0.0238541	0	#NAME?	0	1	1	no
ENSDARG00000015906	mxtx2	0.22797	0.0953814	0	0	0	0	ENSDARG00000015906	mxtx2	12:29236273-29237815	EGFP	SATB2	NOTEST	0.107784	0	#NAME?	0	1	1	no
ENSDARG00000016088	rtn2a	0.148224	0	0	0	0	0	ENSDARG00000016088	rtn2a	15:9010890-9031996	EGFP	SATB2	NOTEST	0.049408	0	#NAME?	0	1	1	no
ENSDARG00000016421	crygm1	0.278723	0	0	0	0	0	ENSDARG00000016421	crygm1	9:22011911-22012819	EGFP	SATB2	NOTEST	0.0929076	0	#NAME?	0	1	1	no
ENSDARG00000016918	ace2	0.088997	0.0691199	0	0	0	0	ENSDARG00000016918	ace2	11:29975829-29996357	EGFP	SATB2	NOTEST	0.0527056	0	#NAME?	0	1	1	no
ENSDARG00000017188	si:ch211-223m11.2	0.101646	0	0	0	0	0	ENSDARG00000017188	si:ch211-223m11.2	20:14096857-14114151	EGFP	SATB2	NOTEST	0.0338819	0	#NAME?	0	1	1	no
ENSDARG00000017193	cnn1a	0.229609	0	0	0	0	0	ENSDARG00000017193	cnn1a	1:52214894-52222989	EGFP	SATB2	NOTEST	0.0765364	0	#NAME?	0	1	1	no
ENSDARG00000017429	sphkap	0.408358	0	0.0548616	0	0	0	ENSDARG00000017429	sphkap	18:46395908-46464501	EGFP	SATB2	NOTEST	0.154407	0	#NAME?	0	1	1	no
ENSDARG00000017983	rsph14	0.568574	0.101819	0	0	0	0	ENSDARG00000017983	rsph14	8:44566707-44586985	EGFP	SATB2	NOTEST	0.223464	0	#NAME?	0	1	1	no
ENSDARG00000018077	rbp1	0.168573	0	1.06836	0	0	0	ENSDARG00000018077	rbp1	2:39028336-39046184	EGFP	SATB2	NOTEST	0.412312	0	#NAME?	0	1	1	no
ENSDARG00000018351	hpda	0.413943	0	0	0	0	0	ENSDARG00000018351	hpda	5:2815020-2852285	EGFP	SATB2	NOTEST	0.137981	0	#NAME?	0	1	1	no
ENSDARG00000018418	pth1rb	0.0602061	0	0	0	0	0	ENSDARG00000018418	pth1rb	12:9257456-9294819	EGFP	SATB2	NOTEST	0.0200687	0	#NAME?	0	1	1	no
ENSDARG00000018671	si:ch211-262i1.4	0.684545	0	0	0	0	0	ENSDARG00000018671	si:ch211-262i1.4	11:14295010-14300253	EGFP	SATB2	NOTEST	0.228182	0	#NAME?	0	1	1	no
ENSDARG00000018797	crygmxl1	0.225085	0	0	0	0	0	ENSDARG00000018797	crygmxl1	9:22056171-22057658	EGFP	SATB2	NOTEST	0.0750285	0	#NAME?	0	1	1	no
ENSDARG00000019660	rxfp2b	0.230608	0	0	0	0	0	ENSDARG00000019660	rxfp2b	15:31735930-31772657	EGFP	SATB2	NOTEST	0.0768692	0	#NAME?	0	1	1	no
ENSDARG00000019990	cabp1a	0.558431	0	0	0	0	0	ENSDARG00000019990	cabp1a	8:39890185-39952727	EGFP	SATB2	NOTEST	0.186144	0	#NAME?	0	1	1	no
ENSDARG00000020028	cps1	0.150826	0	0.0249357	0	0	0	ENSDARG00000020028	cps1	9:39026310-39139722	EGFP	SATB2	NOTEST	0.0585872	0	#NAME?	0	1	1	no
ENSDARG00000020758	tmem178	0.101861	0	0.0544389	0	0	0	ENSDARG00000020758	tmem178	11:30513655-30531106	EGFP	SATB2	NOTEST	0.0521	0	#NAME?	0	1	1	no
ENSDARG00000021172	cyp2ad2	0.244207	0	0	0	0	0	ENSDARG00000021172	cyp2ad2	20:25525801-25558418	EGFP	SATB2	NOTEST	0.0814023	0	#NAME?	0	1	1	no
ENSDARG00000021462	daw1	0.33041	0.146447	0	0	0	0	ENSDARG00000021462	daw1	18:46382483-46394080	EGFP	SATB2	NOTEST	0.158953	0	#NAME?	0	1	1	no
ENSDARG00000021497	gpr132a	0	0.196724	0	0	0	0	ENSDARG00000021497	gpr132a	17:39760144-39761086	EGFP	SATB2	NOTEST	0.0655747	0	#NAME?	0	1	1	no
ENSDARG00000021909	VSTM2A	0.919478	0	0	0	0	0	ENSDARG00000021909	VSTM2A	24:402492-495025	EGFP	SATB2	NOTEST	0.306493	0	#NAME?	0	1	1	no
ENSDARG00000022098	opn4a	0.497716	0	0	0	0	0	ENSDARG00000022098	opn4a	13:22421150-22464121	EGFP	SATB2	NOTEST	0.165905	0	#NAME?	0	1	1	no
ENSDARG00000022295	hnf1bb	0.147093	0	0	0	0	0	ENSDARG00000022295	hnf1bb	21:38817784-38840667	EGFP	SATB2	NOTEST	0.0490311	0	#NAME?	0	1	1	no
ENSDARG00000022334	si:ch211-156l18.7	0.995149	0	0	0	0	0	ENSDARG00000022334	si:ch211-156l18.7	11:12175161-12184543	EGFP	SATB2	NOTEST	0.331716	0	#NAME?	0	1	1	no
ENSDARG00000022668	grapb	0.400335	0	0	0	0	0	ENSDARG00000022668	grapb	1:8165339-8192418	EGFP	SATB2	NOTEST	0.133445	0	#NAME?	0	1	1	no
ENSDARG00000022938	taar11	0.458644	0	0	0	0	0	ENSDARG00000022938	taar11	20:46131811-46132911	EGFP	SATB2	NOTEST	0.152881	0	#NAME?	0	1	1	no
ENSDARG00000023519	BX323555.1	1.13195	0	0	0	0	0	ENSDARG00000023519	BX323555.1	21:8058251-8059239	EGFP	SATB2	NOTEST	0.377318	0	#NAME?	0	1	1	no
ENSDARG00000023722	hcrtr2	0.291456	0.363432	0	0	0	0	ENSDARG00000023722	hcrtr2	13:2010286-2060713	EGFP	SATB2	NOTEST	0.218296	0	#NAME?	0	1	1	no
ENSDARG00000024139	p2rx8	0.56399	0.103409	0	0	0	0	ENSDARG00000024139	p2rx8	15:16343072-16371103	EGFP	SATB2	NOTEST	0.222466	0	#NAME?	0	1	1	no
ENSDARG00000024503	c6ast3	0.553502	0	0	0	0	0	ENSDARG00000024503	c6ast3	7:38642113-38644560	EGFP	SATB2	NOTEST	0.184501	0	#NAME?	0	1	1	no
ENSDARG00000025162	asic4a	0.0613312	0.0844361	0	0	0	0	ENSDARG00000025162	asic4a	9:10557143-11341315	EGFP	SATB2	NOTEST	0.0485891	0	#NAME?	0	1	1	no
ENSDARG00000025600	or102-5	0.363562	0	0	0	0	0	ENSDARG00000025600	or102-5	15:31481938-31482892	EGFP	SATB2	NOTEST	0.121187	0	#NAME?	0	1	1	no
ENSDARG00000025658	or111-2	0.788058	0.0917237	0	0	0	0	ENSDARG00000025658	or111-2	15:31331355-31366742	EGFP	SATB2	NOTEST	0.29326	0	#NAME?	0	1	1	no
ENSDARG00000026513	hoxb6b	0.128978	0	0	0	0	0	ENSDARG00000026513	hoxb6b	12:27127138-27128768	EGFP	SATB2	NOTEST	0.0429926	0	#NAME?	0	1	1	no
ENSDARG00000026764	ahsg1	0.127983	0	0.0564059	0	0	0	ENSDARG00000026764	ahsg1	22:37874690-37881714	EGFP	SATB2	NOTEST	0.061463	0	#NAME?	0	1	1	no
ENSDARG00000026855	cacna2d4a	0.0582781	0	0	0	0	0	ENSDARG00000026855	cacna2d4a	4:20271462-20292853	EGFP	SATB2	NOTEST	0.019426	0	#NAME?	0	1	1	no
ENSDARG00000029057	tm6sf2	0.65021	0	0	0	0	0	ENSDARG00000029057	tm6sf2	22:17784413-17823608	EGFP	SATB2	NOTEST	0.216737	0	#NAME?	0	1	1	no
ENSDARG00000029069	tnni2a.4	0.178321	0	0	0	0	0	ENSDARG00000029069	tnni2a.4	25:31276841-31288658	EGFP	SATB2	NOTEST	0.0594403	0	#NAME?	0	1	1	no
ENSDARG00000029461	cd209	0	0	0.179801	0	0	0	ENSDARG00000029461	cd209	10:24971472-25028527	EGFP	SATB2	NOTEST	0.0599336	0	#NAME?	0	1	1	no
ENSDARG00000029511	kcns3b	0.599861	0	0	0	0	0	ENSDARG00000029511	kcns3b	20:14114257-14118296	EGFP	SATB2	NOTEST	0.199954	0	#NAME?	0	1	1	no
ENSDARG00000029635	si:dkey-47k20.3	0.191662	0	0	0	0	0	ENSDARG00000029635	si:dkey-47k20.3	18:33570169-33577224	EGFP	SATB2	NOTEST	0.0638872	0	#NAME?	0	1	1	no
ENSDARG00000029710	lrrc30a	0.538791	0	0	0	0	0	ENSDARG00000029710	lrrc30a	24:41678256-41679356	EGFP	SATB2	NOTEST	0.179597	0	#NAME?	0	1	1	no
ENSDARG00000029803	oxgr1b	0.711146	0	0	0	0	0	ENSDARG00000029803	oxgr1b	9:29323162-29328009	EGFP	SATB2	NOTEST	0.237049	0	#NAME?	0	1	1	no
ENSDARG00000029859	armh1	0.4273	0	0.131765	0	0	0	ENSDARG00000029859	armh1	8:18214080-18229209	EGFP	SATB2	NOTEST	0.186355	0	#NAME?	0	1	1	no
ENSDARG00000029890	si:dkeyp-86f7.4	0.929152	0	0	0	0	0	ENSDARG00000029890	si:dkeyp-86f7.4	14:9432626-9447115	EGFP	SATB2	NOTEST	0.309717	0	#NAME?	0	1	1	no
ENSDARG00000029993	si:dkey-42l23.9	0.32094	0	0	0	0	0	ENSDARG00000029993	si:dkey-42l23.9	15:37773125-37774544	EGFP	SATB2	NOTEST	0.10698	0	#NAME?	0	1	1	no
ENSDARG00000030270	tnnt3a	0.92662	0.0800758	0	0	0	0	ENSDARG00000030270	tnnt3a	25:31405265-31418457	EGFP	SATB2	NOTEST	0.335565	0	#NAME?	0	1	1	no
ENSDARG00000031243	snai3	0.235789	0	0	0	0	0	ENSDARG00000031243	snai3	7:55112921-55120300	EGFP	SATB2	NOTEST	0.0785962	0	#NAME?	0	1	1	no
ENSDARG00000031316	six6b	0.137403	0	0	0	0	0	ENSDARG00000031316	six6b	20:20428327-20582383	EGFP	SATB2	NOTEST	0.0458011	0	#NAME?	0	1	1	no
ENSDARG00000032156	zgc:171776	0	0.181048	0	0	0	0	ENSDARG00000032156	zgc:171776	9:8396754-8399119	EGFP	SATB2	NOTEST	0.0603493	0	#NAME?	0	1	1	no
ENSDARG00000032578	pax2b	0.0895879	0	0	0	0	0	ENSDARG00000032578	pax2b	12:45799981-45876387	EGFP	SATB2	NOTEST	0.0298626	0	#NAME?	0	1	1	no
ENSDARG00000032639	cd36	0.0837699	0.068442	0	0	0	0	ENSDARG00000032639	cd36	4:22658471-22671469	EGFP	SATB2	NOTEST	0.0507373	0	#NAME?	0	1	1	no
ENSDARG00000032885	si:ch211-226m7.4	0.216552	0	0	0	0	0	ENSDARG00000032885	si:ch211-226m7.4	11:28620682-28631342	EGFP	SATB2	NOTEST	0.0721839	0	#NAME?	0	1	1	no
ENSDARG00000032963	her12	0.319924	0	0	0	0	0	ENSDARG00000032963	her12	23:21444921-21446985	EGFP	SATB2	NOTEST	0.106641	0	#NAME?	0	1	1	no
ENSDARG00000033161	sst1.2	0.141762	0	0	0	0	0	ENSDARG00000033161	sst1.2	15:36115954-36120277	EGFP	SATB2	NOTEST	0.0472541	0	#NAME?	0	1	1	no
ENSDARG00000033956	oxtr	0.917978	0	0	0	0	0	ENSDARG00000033956	oxtr	6:41956354-41974205	EGFP	SATB2	NOTEST	0.305993	0	#NAME?	0	1	1	no
ENSDARG00000034528	chodl	0.26349	0	0.0926877	0	0	0	ENSDARG00000034528	chodl	24:24014879-24028235	EGFP	SATB2	NOTEST	0.118726	0	#NAME?	0	1	1	no
ENSDARG00000034862	f7	0.0637867	0	0	0	0	0	ENSDARG00000034862	f7	1:119959-125246	EGFP	SATB2	NOTEST	0.0212622	0	#NAME?	0	1	1	no
ENSDARG00000035095	tdgf1	0.769794	0	0.31172	0	0	0	ENSDARG00000035095	tdgf1	10:1955474-1961930	EGFP	SATB2	NOTEST	0.360505	0	#NAME?	0	1	1	no
ENSDARG00000035214	si:dkey-47k20.8	0.134619	0	0	0	0	0	ENSDARG00000035214	si:dkey-47k20.8	18:33675663-33679254	EGFP	SATB2	NOTEST	0.0448731	0	#NAME?	0	1	1	no
ENSDARG00000035257	akr1a1a	0.127115	0	0	0	0	0	ENSDARG00000035257	akr1a1a	5:41521042-41531629	EGFP	SATB2	NOTEST	0.0423718	0	#NAME?	0	1	1	no
ENSDARG00000035602	dao.1	0.097046	0	0	0	0	0	ENSDARG00000035602	dao.1	5:20188437-20195350	EGFP	SATB2	NOTEST	0.0323487	0	#NAME?	0	1	1	no
ENSDARG00000035648	irx4a	0.0463959	0	0.0812678	0	0	0	ENSDARG00000035648	irx4a	16:378765-383664	EGFP	SATB2	NOTEST	0.0425546	0	#NAME?	0	1	1	no
ENSDARG00000035765	CU633984.1	0.500001	0.0860946	0	0	0	0	ENSDARG00000035765	CU633984.1	15:6678520-6727082	EGFP	SATB2	NOTEST	0.195365	0	#NAME?	0	1	1	no
ENSDARG00000036140	crybgx	0.184609	0	0	0	0	0	ENSDARG00000036140	crybgx	7:34222432-34225011	EGFP	SATB2	NOTEST	0.0615364	0	#NAME?	0	1	1	no
ENSDARG00000036584	st8sia5	0.100555	0	0	0	0	0	ENSDARG00000036584	st8sia5	21:5209475-5240595	EGFP	SATB2	NOTEST	0.0335182	0	#NAME?	0	1	1	no
ENSDARG00000036671	tnni4b.2	0.148981	0.0556322	0.123846	0	0	0	ENSDARG00000036671	tnni4b.2	25:20089985-20099773	EGFP	SATB2	NOTEST	0.109486	0	#NAME?	0	1	1	no
ENSDARG00000036743	nitr7a	0.88645	0	0	0	0	0	ENSDARG00000036743	nitr7a	7:17253148-17383554	EGFP	SATB2	NOTEST	0.295483	0	#NAME?	0	1	1	no
ENSDARG00000036833	upp2	0.193675	0	0	0	0	0	ENSDARG00000036833	upp2	9:16097811-16109001	EGFP	SATB2	NOTEST	0.0645584	0	#NAME?	0	1	1	no
ENSDARG00000037246	pimr212	0.385296	0.106415	0	0	0	0	ENSDARG00000037246	pimr212	14:26395313-26400501	EGFP	SATB2	NOTEST	0.163904	0	#NAME?	0	1	1	no
ENSDARG00000037278	lrata	0.521777	0	0	0	0	0	ENSDARG00000037278	lrata	1:25696797-25698039	EGFP	SATB2	NOTEST	0.173926	0	#NAME?	0	1	1	no
ENSDARG00000037292	chrm1a	0.572436	0	0	0	0	0	ENSDARG00000037292	chrm1a	14:24258561-24262815	EGFP	SATB2	NOTEST	0.190812	0	#NAME?	0	1	1	no
ENSDARG00000037475	foxb2	1.2885	0	0	0	0	0	ENSDARG00000037475	foxb2	8:38505382-38506339	EGFP	SATB2	NOTEST	0.4295	0	#NAME?	0	1	1	no
ENSDARG00000037526	CR749762.1	0.581288	0	0	0	0	0	ENSDARG00000037526	CR749762.1	23:20373313-20374396	EGFP	SATB2	NOTEST	0.193763	0	#NAME?	0	1	1	no
ENSDARG00000037576	BX530018.1	0.383365	0	0	0	0	0	ENSDARG00000037576	BX530018.1	1:14372679-14373891	EGFP	SATB2	NOTEST	0.127788	0	#NAME?	0	1	1	no
ENSDARG00000037695	pcdh2aa1	0	0.0580701	0	0	0	0	ENSDARG00000037695	pcdh2aa1	14:2118774-2327853	EGFP	SATB2	NOTEST	0.0193567	0	#NAME?	0	1	1	no
ENSDARG00000037760	uncx4.1	0.367804	0	0	0	0	0	ENSDARG00000037760	uncx4.1	1:9290102-9294115	EGFP	SATB2	NOTEST	0.122601	0	#NAME?	0	1	1	no
ENSDARG00000038089	TMEM114	0.374558	0	0.115723	0	0	0	ENSDARG00000038089	TMEM114	3:27929504-27952302	EGFP	SATB2	NOTEST	0.163427	0	#NAME?	0	1	1	no
ENSDARG00000038147	hbbe3	0.400403	0	0	0	0	0	ENSDARG00000038147	hbbe3	12:20339412-20340543	EGFP	SATB2	NOTEST	0.133468	0	#NAME?	0	1	1	no
ENSDARG00000038439	fabp10a	0	0.959948	0	0	0	0	ENSDARG00000038439	fabp10a	16:52512024-52516915	EGFP	SATB2	NOTEST	0.319983	0	#NAME?	0	1	1	no
ENSDARG00000038981	zgc:153615	0.172285	0	0	0	0	0	ENSDARG00000038981	zgc:153615	2:9629557-9646857	EGFP	SATB2	NOTEST	0.0574282	0	#NAME?	0	1	1	no
ENSDARG00000039173	ctslb	0.120283	0	0	0	0	0	ENSDARG00000039173	ctslb	12:16617137-16619757	EGFP	SATB2	NOTEST	0.0400942	0	#NAME?	0	1	1	no
ENSDARG00000039174	olfm3b	0.577004	0	0.105431	0	0	0	ENSDARG00000039174	olfm3b	2:15341688-15362923	EGFP	SATB2	NOTEST	0.227478	0	#NAME?	0	1	1	no
ENSDARG00000039218	gpr101	0.0809534	0.0994691	0.320342	0	0	0	ENSDARG00000039218	gpr101	14:31890000-31893996	EGFP	SATB2	NOTEST	0.166921	0	#NAME?	0	1	1	no
ENSDARG00000039349	qrfpra	0.688641	0	0	0	0	0	ENSDARG00000039349	qrfpra	13:30215764-30235220	EGFP	SATB2	NOTEST	0.229547	0	#NAME?	0	1	1	no
ENSDARG00000039516	c8a	0.170888	0	0.140179	0	0	0	ENSDARG00000039516	c8a	2:1470069-1518360	EGFP	SATB2	NOTEST	0.103689	0	#NAME?	0	1	1	no
ENSDARG00000039569	emx1	0.356241	0	0	0	0	0	ENSDARG00000039569	emx1	13:15004397-15010683	EGFP	SATB2	NOTEST	0.118747	0	#NAME?	0	1	1	no
ENSDARG00000039615	fgf8b	0.621425	0	0	0	0	0	ENSDARG00000039615	fgf8b	1:31638273-31672343	EGFP	SATB2	NOTEST	0.207142	0	#NAME?	0	1	1	no
ENSDARG00000039687	zgc:194221	0	0.103665	0	0	0	0	ENSDARG00000039687	zgc:194221	22:2680894-2682759	EGFP	SATB2	NOTEST	0.0345549	0	#NAME?	0	1	1	no
ENSDARG00000039730	zgc:112160	0.220541	0	0	0	0	0	ENSDARG00000039730	zgc:112160	7:35062131-35066457	EGFP	SATB2	NOTEST	0.0735137	0	#NAME?	0	1	1	no
ENSDARG00000039979	tecrl2b	0.220786	0	0	0	0	0	ENSDARG00000039979	tecrl2b	2:15300087-15324837	EGFP	SATB2	NOTEST	0.0735954	0	#NAME?	0	1	1	no
ENSDARG00000040008	neurod6a	0.0625087	0	0	0	0	0	ENSDARG00000040008	neurod6a	24:32411752-32474949	EGFP	SATB2	NOTEST	0.0208362	0	#NAME?	0	1	1	no
ENSDARG00000040081	zp3d.1	0.0612289	0	0	0	0	0	ENSDARG00000040081	zp3d.1	16:42057917-42152145	EGFP	SATB2	NOTEST	0.0204096	0	#NAME?	0	1	1	no
ENSDARG00000040162	zgc:165461	0.351091	0	0	0	0	0	ENSDARG00000040162	zgc:165461	17:23298927-23302321	EGFP	SATB2	NOTEST	0.11703	0	#NAME?	0	1	1	no
ENSDARG00000040254	hormad1	0.258048	0	0	0	0	0	ENSDARG00000040254	hormad1	16:29551022-29577708	EGFP	SATB2	NOTEST	0.0860161	0	#NAME?	0	1	1	no
ENSDARG00000040358	spred3	0.364058	0.0366079	0.0342582	0	0	0	ENSDARG00000040358	spred3	18:44596786-44611252	EGFP	SATB2	NOTEST	0.144975	0	#NAME?	0	1	1	no
ENSDARG00000040594	v2rh32	0.338806	0	0	0	0	0	ENSDARG00000040594	v2rh32	18:33373810-33378068	EGFP	SATB2	NOTEST	0.112935	0	#NAME?	0	1	1	no
ENSDARG00000040632	v2rx1	0.717704	0	0	0	0	0	ENSDARG00000040632	v2rx1	18:33333410-33337703	EGFP	SATB2	NOTEST	0.239235	0	#NAME?	0	1	1	no
ENSDARG00000040732	elavl2	0.331381	0	0	0	0	0	ENSDARG00000040732	elavl2	22:38252685-38274995	EGFP	SATB2	NOTEST	0.11046	0	#NAME?	0	1	1	no
ENSDARG00000040736	crygm7	0.848301	0	0	0	0	0	ENSDARG00000040736	crygm7	9:21993091-21994057	EGFP	SATB2	NOTEST	0.282767	0	#NAME?	0	1	1	no
ENSDARG00000040738	zgc:153846	0.74084	0	0	0	0	0	ENSDARG00000040738	zgc:153846	9:22017367-22018304	EGFP	SATB2	NOTEST	0.246947	0	#NAME?	0	1	1	no
ENSDARG00000040948	olig1	0.0927671	0	0	0	0	0	ENSDARG00000040948	olig1	9:32728652-32730487	EGFP	SATB2	NOTEST	0.0309224	0	#NAME?	0	1	1	no
ENSDARG00000041007	AL845428.1	0.171461	0	0.353836	0	0	0	ENSDARG00000041007	AL845428.1	15:31454929-31457948	EGFP	SATB2	NOTEST	0.175099	0	#NAME?	0	1	1	no
ENSDARG00000041115	cnfn	0.296003	0	0	0	0	0	ENSDARG00000041115	cnfn	16:11790639-11798994	EGFP	SATB2	NOTEST	0.0986677	0	#NAME?	0	1	1	no
ENSDARG00000041133	rapsn	0.630546	0	0	0	0	0	ENSDARG00000041133	rapsn	18:20494412-20511015	EGFP	SATB2	NOTEST	0.210182	0	#NAME?	0	1	1	no
ENSDARG00000041292	si:ch211-231m23.4	0.271395	0	0	0	0	0	ENSDARG00000041292	si:ch211-231m23.4	16:50163351-50164281	EGFP	SATB2	NOTEST	0.0904651	0	#NAME?	0	1	1	no
ENSDARG00000041295	lim2.5	0.155087	0	0	0	0	0	ENSDARG00000041295	lim2.5	16:50166420-50181206	EGFP	SATB2	NOTEST	0.0516957	0	#NAME?	0	1	1	no
ENSDARG00000041490	afp4	0.201445	0	0	0	0	0	ENSDARG00000041490	afp4	16:45904152-45910050	EGFP	SATB2	NOTEST	0.0671484	0	#NAME?	0	1	1	no
ENSDARG00000041569	ces2	0.0823647	0.387785	0.200939	0	0	0	ENSDARG00000041569	ces2	18:17408469-17415609	EGFP	SATB2	NOTEST	0.223696	0	#NAME?	0	1	1	no
ENSDARG00000041595	ces3	0	0.208295	0	0	0	0	ENSDARG00000041595	ces3	18:17418253-17426306	EGFP	SATB2	NOTEST	0.0694317	0	#NAME?	0	1	1	no
ENSDARG00000041645	sb:cb37	0.0346698	0	0.0355239	0	0	0	ENSDARG00000041645	sb:cb37	15:21137045-21155657	EGFP	SATB2	NOTEST	0.0233979	0	#NAME?	0	1	1	no
ENSDARG00000041735	tmem237a	0.396254	0	0	0	0	0	ENSDARG00000041735	tmem237a	9:13714378-13728937	EGFP	SATB2	NOTEST	0.132085	0	#NAME?	0	1	1	no
ENSDARG00000041779	trdn	0.182643	0	0.246866	0	0	0	ENSDARG00000041779	trdn	20:40150611-40231379	EGFP	SATB2	NOTEST	0.14317	0	#NAME?	0	1	1	no
ENSDARG00000041791	mgat4c	0.59428	0	0.075746	0	0	0	ENSDARG00000041791	mgat4c	18:16387744-16590056	EGFP	SATB2	NOTEST	0.223342	0	#NAME?	0	1	1	no
ENSDARG00000041848	rh50	0.276801	0	0	0	0	0	ENSDARG00000041848	rh50	8:37259397-37263524	EGFP	SATB2	NOTEST	0.0922671	0	#NAME?	0	1	1	no
ENSDARG00000042033	mettl11b	0.143923	0	0.15433	0	0	0	ENSDARG00000042033	mettl11b	20:34455644-34466483	EGFP	SATB2	NOTEST	0.0994176	0	#NAME?	0	1	1	no
ENSDARG00000042041	tal2	0.290718	0.299322	0	0	0	0	ENSDARG00000042041	tal2	5:9348283-9349045	EGFP	SATB2	NOTEST	0.19668	0	#NAME?	0	1	1	no
ENSDARG00000042106	mnx2a	0.379162	0	0	0	0	0	ENSDARG00000042106	mnx2a	9:7724151-7728223	EGFP	SATB2	NOTEST	0.126387	0	#NAME?	0	1	1	no
ENSDARG00000042291	dlx6a	0.387465	0	0	0	0	0	ENSDARG00000042291	dlx6a	19:41419518-41468553	EGFP	SATB2	NOTEST	0.129155	0	#NAME?	0	1	1	no
ENSDARG00000042515	gpr176	0.318163	0	0	0	0	0	ENSDARG00000042515	gpr176	20:28960339-28974309	EGFP	SATB2	NOTEST	0.106054	0	#NAME?	0	1	1	no
ENSDARG00000042559	tnni1c	0.792437	0	0	0	0	0	ENSDARG00000042559	tnni1c	18:6625347-6634424	EGFP	SATB2	NOTEST	0.264146	0	#NAME?	0	1	1	no
ENSDARG00000042920	sult3st3	0.126177	0	0	0	0	0	ENSDARG00000042920	sult3st3	22:15315654-15318280	EGFP	SATB2	NOTEST	0.0420591	0	#NAME?	0	1	1	no
ENSDARG00000042936	fam228a	0.552999	0	0	0	0	0	ENSDARG00000042936	fam228a	20:25350434-25355985	EGFP	SATB2	NOTEST	0.184333	0	#NAME?	0	1	1	no
ENSDARG00000042947	mstna	0	0.329704	0	0	0	0	ENSDARG00000042947	mstna	22:12790836-12795340	EGFP	SATB2	NOTEST	0.109901	0	#NAME?	0	1	1	no
ENSDARG00000042961	zgc:100920	0.495299	0	0	0	0	0	ENSDARG00000042961	zgc:100920	8:23034717-23120252	EGFP	SATB2	NOTEST	0.1651	0	#NAME?	0	1	1	no
ENSDARG00000042970	gng8	0.246514	0	0	0	0	0	ENSDARG00000042970	gng8	21:25231159-25235926	EGFP	SATB2	NOTEST	0.0821714	0	#NAME?	0	1	1	no
ENSDARG00000042992	crygs1	0.402765	0	0	0	0	0	ENSDARG00000042992	crygs1	22:11710466-11714158	EGFP	SATB2	NOTEST	0.134255	0	#NAME?	0	1	1	no
ENSDARG00000043066	nog2	0.17915	0.16169	0	0	0	0	ENSDARG00000043066	nog2	24:38814733-38816725	EGFP	SATB2	NOTEST	0.113614	0	#NAME?	0	1	1	no
ENSDARG00000043168	CELA1 (1 of many)	0.157068	0	0	0	0	0	ENSDARG00000043168	CELA1 (1 of many)	22:7497318-7508894	EGFP	SATB2	NOTEST	0.052356	0	#NAME?	0	1	1	no
ENSDARG00000043196	rnasel2	0.213257	0	0	0	0	0	ENSDARG00000043196	rnasel2	22:6293562-6294749	EGFP	SATB2	NOTEST	0.0710857	0	#NAME?	0	1	1	no
ENSDARG00000043394	si:dkey-71h2.2	0.491139	0	0	0	0	0	ENSDARG00000043394	si:dkey-71h2.2	20:19276931-19366022	EGFP	SATB2	NOTEST	0.163713	0	#NAME?	0	1	1	no
ENSDARG00000043460	wu:fj39g12	0.225637	0	0	0	0	0	ENSDARG00000043460	wu:fj39g12	16:17204250-17207754	EGFP	SATB2	NOTEST	0.0752123	0	#NAME?	0	1	1	no
ENSDARG00000043466	kcnk3a	0.126015	0	0	0	0	0	ENSDARG00000043466	kcnk3a	20:13360655-13394780	EGFP	SATB2	NOTEST	0.0420051	0	#NAME?	0	1	1	no
ENSDARG00000043664	si:dkey-63b1.1	0.939867	0	0	0	0	0	ENSDARG00000043664	si:dkey-63b1.1	20:10287060-10288156	EGFP	SATB2	NOTEST	0.313289	0	#NAME?	0	1	1	no
ENSDARG00000043769	si:ch211-282j17.1	0.274964	0	0	0	0	0	ENSDARG00000043769	si:ch211-282j17.1	7:3622557-3723144	EGFP	SATB2	NOTEST	0.0916548	0	#NAME?	0	1	1	no
ENSDARG00000043847	tmem244	0.211492	0	0	0	0	0	ENSDARG00000043847	tmem244	20:2099242-2206310	EGFP	SATB2	NOTEST	0.0704972	0	#NAME?	0	1	1	no
ENSDARG00000043901	ugt5g2	0.724295	0	0	0	0	0	ENSDARG00000043901	ugt5g2	10:22082595-22086626	EGFP	SATB2	NOTEST	0.241432	0	#NAME?	0	1	1	no
ENSDARG00000043934	il17a/f2	0.250577	0	0	0	0	0	ENSDARG00000043934	il17a/f2	17:12730024-12733858	EGFP	SATB2	NOTEST	0.0835257	0	#NAME?	0	1	1	no
ENSDARG00000044278	synpr	0.411383	0	0	0	0	0	ENSDARG00000044278	synpr	6:41223203-41229787	EGFP	SATB2	NOTEST	0.137128	0	#NAME?	0	1	1	no
ENSDARG00000044279	opn1mw3	0	0	0.15693	0	0	0	ENSDARG00000044279	opn1mw3	6:41191481-41193419	EGFP	SATB2	NOTEST	0.05231	0	#NAME?	0	1	1	no
ENSDARG00000044280	opn1mw2	0.607714	0	0	0	0	0	ENSDARG00000044280	opn1mw2	6:41186319-41189460	EGFP	SATB2	NOTEST	0.202571	0	#NAME?	0	1	1	no
ENSDARG00000044336	si:ch211-218m3.16	0.0875071	0.052226	0	0	0	0	ENSDARG00000044336	si:ch211-218m3.16	21:40292800-40296052	EGFP	SATB2	NOTEST	0.0465777	0	#NAME?	0	1	1	no
ENSDARG00000044337	or115-6	0.182663	0	0	0	0	0	ENSDARG00000044337	or115-6	21:40280026-40282140	EGFP	SATB2	NOTEST	0.0608878	0	#NAME?	0	1	1	no
ENSDARG00000044343	or115-13	0	0.0887975	0	0	0	0	ENSDARG00000044343	or115-13	21:40219817-40221641	EGFP	SATB2	NOTEST	0.0295992	0	#NAME?	0	1	1	no
ENSDARG00000044514	st6gal1	0.490026	0	0	0	0	0	ENSDARG00000044514	st6gal1	21:31150437-31184035	EGFP	SATB2	NOTEST	0.163342	0	#NAME?	0	1	1	no
ENSDARG00000044754	gnrh2	0.228546	0	0	0	0	0	ENSDARG00000044754	gnrh2	21:15824181-15828029	EGFP	SATB2	NOTEST	0.0761821	0	#NAME?	0	1	1	no
ENSDARG00000044862	opn1lw1	0.501637	0	0	0	0	0	ENSDARG00000044862	opn1lw1	11:25477642-25480037	EGFP	SATB2	NOTEST	0.167212	0	#NAME?	0	1	1	no
ENSDARG00000044875	crygm2e	1.07461	0	0	0	0	0	ENSDARG00000044875	crygm2e	9:22080121-22080989	EGFP	SATB2	NOTEST	0.358202	0	#NAME?	0	1	1	no
ENSDARG00000044900	prlhr2a	1.05646	0	0	0	0	0	ENSDARG00000044900	prlhr2a	8:37905665-37950194	EGFP	SATB2	NOTEST	0.352152	0	#NAME?	0	1	1	no
ENSDARG00000045039	kcnj16	0.793388	0	0	0	0	0	ENSDARG00000045039	kcnj16	12:36267760-36268723	EGFP	SATB2	NOTEST	0.264463	0	#NAME?	0	1	1	no
ENSDARG00000045142	hbae5	0.246901	0	0	0	0	0	ENSDARG00000045142	hbae5	12:20342450-20353541	EGFP	SATB2	NOTEST	0.0823004	0	#NAME?	0	1	1	no
ENSDARG00000045157	si:ch211-147h1.4	0.0743994	0	0	0	0	0	ENSDARG00000045157	si:ch211-147h1.4	12:18663153-18666282	EGFP	SATB2	NOTEST	0.0247998	0	#NAME?	0	1	1	no
ENSDARG00000045268	tectb	0.238468	0	0	0	0	0	ENSDARG00000045268	tectb	12:31476168-31484677	EGFP	SATB2	NOTEST	0.0794895	0	#NAME?	0	1	1	no
ENSDARG00000045275	klhl14	0.130567	0	0.119679	0	0	0	ENSDARG00000045275	klhl14	24:35880329-35930390	EGFP	SATB2	NOTEST	0.0834155	0	#NAME?	0	1	1	no
ENSDARG00000045378	pi15a	0.383365	0.111264	0	0	0	0	ENSDARG00000045378	pi15a	24:14801843-14810634	EGFP	SATB2	NOTEST	0.164876	0	#NAME?	0	1	1	no
ENSDARG00000045442	cpb1	0.333331	0.10082	0	0	0	0	ENSDARG00000045442	cpb1	24:4755390-4765740	EGFP	SATB2	NOTEST	0.144717	0	#NAME?	0	1	1	no
ENSDARG00000045612	lrrc10	0.635316	0	0	0	0	0	ENSDARG00000045612	lrrc10	25:28672538-28674739	EGFP	SATB2	NOTEST	0.211772	0	#NAME?	0	1	1	no
ENSDARG00000045638	slc13a1	0.205944	0	0.0702261	0	0	0	ENSDARG00000045638	slc13a1	25:27923845-27932723	EGFP	SATB2	NOTEST	0.0920567	0	#NAME?	0	1	1	no
ENSDARG00000045673	il22	0.256504	0.275049	0	0	0	0	ENSDARG00000045673	il22	4:13544594-13548806	EGFP	SATB2	NOTEST	0.177184	0	#NAME?	0	1	1	no
ENSDARG00000045677	opn1sw1	0.262628	0.0815657	0	0	0	0	ENSDARG00000045677	opn1sw1	4:13577664-13580348	EGFP	SATB2	NOTEST	0.114731	0	#NAME?	0	1	1	no
ENSDARG00000045811	lrtm2b	0.232206	0	0	0	0	0	ENSDARG00000045811	lrtm2b	25:19023736-19090628	EGFP	SATB2	NOTEST	0.0774019	0	#NAME?	0	1	1	no
ENSDARG00000045834	si:dkey-14d8.7	0.623577	0	0	0	0	0	ENSDARG00000045834	si:dkey-14d8.7	4:5498229-5539842	EGFP	SATB2	NOTEST	0.207859	0	#NAME?	0	1	1	no
ENSDARG00000045856	fgf6b	0.438618	0	0	0	0	0	ENSDARG00000045856	fgf6b	4:5180649-5183337	EGFP	SATB2	NOTEST	0.146206	0	#NAME?	0	1	1	no
ENSDARG00000051873	zgc:158222	0.167475	0	0	0	0	0	ENSDARG00000051873	zgc:158222	25:21800396-21822426	EGFP	SATB2	NOTEST	0.0558249	0	#NAME?	0	1	1	no
ENSDARG00000052027	tspan1	0.114093	0	0	0	0	0	ENSDARG00000052027	tspan1	6:33104543-33129312	EGFP	SATB2	NOTEST	0.0380311	0	#NAME?	0	1	1	no
ENSDARG00000052099	agxta	0.101425	0.156724	0.210488	0	0	0	ENSDARG00000052099	agxta	6:27090799-27139396	EGFP	SATB2	NOTEST	0.156212	0	#NAME?	0	1	1	no
ENSDARG00000052558	porcn	0	0	0.137749	0	0	0	ENSDARG00000052558	porcn	8:21146261-21155964	EGFP	SATB2	NOTEST	0.0459163	0	#NAME?	0	1	1	no
ENSDARG00000052610	olig4	0.28613	0	0	0	0	0	ENSDARG00000052610	olig4	13:45967178-45968256	EGFP	SATB2	NOTEST	0.0953765	0	#NAME?	0	1	1	no
ENSDARG00000052731	ankrd31	0.0902987	0	0	0	0	0	ENSDARG00000052731	ankrd31	5:51001984-51011386	EGFP	SATB2	NOTEST	0.0300996	0	#NAME?	0	1	1	no
ENSDARG00000052893	rx3	0.358342	0.196945	0	0	0	0	ENSDARG00000052893	rx3	21:10756153-10759223	EGFP	SATB2	NOTEST	0.185095	0	#NAME?	0	1	1	no
ENSDARG00000053062	CR628323.2	0.355929	0	0.162962	0	0	0	ENSDARG00000053062	CR628323.2	17:6358159-6385314	EGFP	SATB2	NOTEST	0.172964	0	#NAME?	0	1	1	no
ENSDARG00000053135	tas1r2.2	0.326455	0	0	0	0	0	ENSDARG00000053135	tas1r2.2	8:46587592-46597751	EGFP	SATB2	NOTEST	0.108818	0	#NAME?	0	1	1	no
ENSDARG00000053526	enpp7.1	0.148258	0	0	0	0	0	ENSDARG00000053526	enpp7.1	12:32402083-32421046	EGFP	SATB2	NOTEST	0.0494194	0	#NAME?	0	1	1	no
ENSDARG00000053630	si:dkey-182o15.5	0.442086	0.154064	0.233656	0	0	0	ENSDARG00000053630	si:dkey-182o15.5	7:29509254-29515727	EGFP	SATB2	NOTEST	0.276602	0	#NAME?	0	1	1	no
ENSDARG00000053648	or135-1	0.210414	0	0	0	0	0	ENSDARG00000053648	or135-1	8:37527574-37531221	EGFP	SATB2	NOTEST	0.0701379	0	#NAME?	0	1	1	no
ENSDARG00000053813	or115-11	0.151787	0	0	0	0	0	ENSDARG00000053813	or115-11	21:40232909-40234525	EGFP	SATB2	NOTEST	0.0505958	0	#NAME?	0	1	1	no
ENSDARG00000053817	or115-2	0.248433	0	0	0	0	0	ENSDARG00000053817	or115-2	21:40296479-40297710	EGFP	SATB2	NOTEST	0.0828109	0	#NAME?	0	1	1	no
ENSDARG00000053833	mtnr1ba	0.121153	0	0	0	0	0	ENSDARG00000053833	mtnr1ba	15:41027465-41064007	EGFP	SATB2	NOTEST	0.0403845	0	#NAME?	0	1	1	no
ENSDARG00000053845	cbln14	0.381406	0	0	0	0	0	ENSDARG00000053845	cbln14	2:37959039-37960688	EGFP	SATB2	NOTEST	0.127135	0	#NAME?	0	1	1	no
ENSDARG00000053875	cryba1b	0.188867	0	0	0	0	0	ENSDARG00000053875	cryba1b	21:39185460-39195314	EGFP	SATB2	NOTEST	0.0629556	0	#NAME?	0	1	1	no
ENSDARG00000053931	si:dkey-42l23.5	1.21794	0	0	0	0	0	ENSDARG00000053931	si:dkey-42l23.5	15:37751112-37752236	EGFP	SATB2	NOTEST	0.40598	0	#NAME?	0	1	1	no
ENSDARG00000054055	ostn	0.28717	0	0.0547664	0	0	0	ENSDARG00000054055	ostn	15:36228834-36249087	EGFP	SATB2	NOTEST	0.113979	0	#NAME?	0	1	1	no
ENSDARG00000054150	cx23	0.994674	0	0	0	0	0	ENSDARG00000054150	cx23	20:37294111-37298274	EGFP	SATB2	NOTEST	0.331558	0	#NAME?	0	1	1	no
ENSDARG00000054184	btr06	0.134646	0	0	0	0	0	ENSDARG00000054184	btr06	7:16205608-16214891	EGFP	SATB2	NOTEST	0.0448819	0	#NAME?	0	1	1	no
ENSDARG00000054199	mthfd2l	0.262286	0	0	0	0	0	ENSDARG00000054199	mthfd2l	8:32389837-32412923	EGFP	SATB2	NOTEST	0.0874285	0	#NAME?	0	1	1	no
ENSDARG00000054254	taar18a	0.504012	0	0	0	0	0	ENSDARG00000054254	taar18a	10:40523706-40524741	EGFP	SATB2	NOTEST	0.168004	0	#NAME?	0	1	1	no
ENSDARG00000054352	lrrc9	0	0.183821	0.298673	0	0	0	ENSDARG00000054352	lrrc9	13:31479813-31494287	EGFP	SATB2	NOTEST	0.160831	0	#NAME?	0	1	1	no
ENSDARG00000054374	alg13	0.555615	0	0	0	0	0	ENSDARG00000054374	alg13	21:34233491-34261784	EGFP	SATB2	NOTEST	0.185205	0	#NAME?	0	1	1	no
ENSDARG00000054655	si:ch211-1f22.5	0.294891	0.227258	0	0	0	0	ENSDARG00000054655	si:ch211-1f22.5	1:56823436-56827882	EGFP	SATB2	NOTEST	0.17405	0	#NAME?	0	1	1	no
ENSDARG00000054734	or116-1	0	0.183528	0	0	0	0	ENSDARG00000054734	or116-1	15:31296516-31298174	EGFP	SATB2	NOTEST	0.061176	0	#NAME?	0	1	1	no
ENSDARG00000054786	faah2b	0.149645	0.0698806	0.0731593	0	0	0	ENSDARG00000054786	faah2b	7:24491965-24527246	EGFP	SATB2	NOTEST	0.0975617	0	#NAME?	0	1	1	no
ENSDARG00000054846	CU657980.1	0.278865	0	0.649264	0	0	0	ENSDARG00000054846	CU657980.1	23:39951552-39952406	EGFP	SATB2	NOTEST	0.309376	0	#NAME?	0	1	1	no
ENSDARG00000054890	rgra	0.546772	0	0	0	0	0	ENSDARG00000054890	rgra	13:29446225-29455859	EGFP	SATB2	NOTEST	0.182257	0	#NAME?	0	1	1	no
ENSDARG00000055185	tm4sf5	0.285298	0	0.15832	0	0	0	ENSDARG00000055185	tm4sf5	7:21841036-21848205	EGFP	SATB2	NOTEST	0.147872	0	#NAME?	0	1	1	no
ENSDARG00000055278	cfb	0.0569065	0	0	0	0	0	ENSDARG00000055278	cfb	21:27416283-27431397	EGFP	SATB2	NOTEST	0.0189688	0	#NAME?	0	1	1	no
ENSDARG00000055317	c1ql4b	0.194991	0	0	0	0	0	ENSDARG00000055317	c1ql4b	6:39812474-39831089	EGFP	SATB2	NOTEST	0.064997	0	#NAME?	0	1	1	no
ENSDARG00000055332	si:dkey-28d5.11	0.130554	0.098337	0	0	0	0	ENSDARG00000055332	si:dkey-28d5.11	7:4624925-4923974	EGFP	SATB2	NOTEST	0.0762969	0	#NAME?	0	1	1	no
ENSDARG00000055346	si:dkey-83f18.2	0.451169	0	0	0	0	0	ENSDARG00000055346	si:dkey-83f18.2	7:4624925-4923974	EGFP	SATB2	NOTEST	0.15039	0	#NAME?	0	1	1	no
ENSDARG00000055388	vtna	0.0708665	0.0651296	0	0	0	0	ENSDARG00000055388	vtna	15:28202169-28223906	EGFP	SATB2	NOTEST	0.045332	0	#NAME?	0	1	1	no
ENSDARG00000055415	zp2l1	0	0.182937	0.289505	0	0	0	ENSDARG00000055415	zp2l1	9:35631439-35633827	EGFP	SATB2	NOTEST	0.15748	0	#NAME?	0	1	1	no
ENSDARG00000055463	lrit3a	0.550039	0	0	0	0	0	ENSDARG00000055463	lrit3a	14:36328424-36345175	EGFP	SATB2	NOTEST	0.183346	0	#NAME?	0	1	1	no
ENSDARG00000055565	cacnb2b	0.226059	0	0.0953917	0	0	0	ENSDARG00000055565	cacnb2b	2:31475771-31540922	EGFP	SATB2	NOTEST	0.10715	0	#NAME?	0	1	1	no
ENSDARG00000055739	ribc1	0.197709	0.063818	0	0	0	0	ENSDARG00000055739	ribc1	23:28685265-28692581	EGFP	SATB2	NOTEST	0.0871758	0	#NAME?	0	1	1	no
ENSDARG00000055920	si:dkey-47k20.9	0.209368	0	0	0	0	0	ENSDARG00000055920	si:dkey-47k20.9	18:33685118-33689274	EGFP	SATB2	NOTEST	0.0697894	0	#NAME?	0	1	1	no
ENSDARG00000055952	v2rc2	0.206651	0	0	0	0	0	ENSDARG00000055952	v2rc2	18:33185818-33282047	EGFP	SATB2	NOTEST	0.0688835	0	#NAME?	0	1	1	no
ENSDARG00000055994	v2rh1	0.915226	0	0	0	0	0	ENSDARG00000055994	v2rh1	18:33490314-33493613	EGFP	SATB2	NOTEST	0.305075	0	#NAME?	0	1	1	no
ENSDARG00000056000	v2rh7	0.492009	0	0	0	0	0	ENSDARG00000056000	v2rh7	18:33521608-33526012	EGFP	SATB2	NOTEST	0.164003	0	#NAME?	0	1	1	no
ENSDARG00000056006	si:dkey-47k20.2	0.682494	0	0	0	0	0	ENSDARG00000056006	si:dkey-47k20.2	18:33557124-33561739	EGFP	SATB2	NOTEST	0.227498	0	#NAME?	0	1	1	no
ENSDARG00000056009	v2rh9	0.304381	0	0	0	0	0	ENSDARG00000056009	v2rh9	18:33464344-33473581	EGFP	SATB2	NOTEST	0.10146	0	#NAME?	0	1	1	no
ENSDARG00000056014	si:dkey-47k20.7	0.374637	0	0	0	0	0	ENSDARG00000056014	si:dkey-47k20.7	18:33652975-33656425	EGFP	SATB2	NOTEST	0.124879	0	#NAME?	0	1	1	no
ENSDARG00000056154	si:ch211-229c8.4	0.180983	0	0	0	0	0	ENSDARG00000056154	si:ch211-229c8.4	18:33185818-33282047	EGFP	SATB2	NOTEST	0.0603277	0	#NAME?	0	1	1	no
ENSDARG00000056180	v2ra17	0.265757	0	0	0	0	0	ENSDARG00000056180	v2ra17	18:33284201-33294131	EGFP	SATB2	NOTEST	0.0885858	0	#NAME?	0	1	1	no
ENSDARG00000056209	myoz1a	0.204265	0	0.128591	0	0	0	ENSDARG00000056209	myoz1a	13:22264913-22278415	EGFP	SATB2	NOTEST	0.110952	0	#NAME?	0	1	1	no
ENSDARG00000056277	or132-5	0.16959	0	0	0	0	0	ENSDARG00000056277	or132-5	21:25375171-25376738	EGFP	SATB2	NOTEST	0.0565299	0	#NAME?	0	1	1	no
ENSDARG00000056294	si:ch211-183d21.3	0.52955	0	0	0	0	0	ENSDARG00000056294	si:ch211-183d21.3	24:37361088-37404466	EGFP	SATB2	NOTEST	0.176517	0	#NAME?	0	1	1	no
ENSDARG00000056314	a2ml	0.0677845	0	0	0	0	0	ENSDARG00000056314	a2ml	15:21113964-21132480	EGFP	SATB2	NOTEST	0.0225948	0	#NAME?	0	1	1	no
ENSDARG00000056395	onecut3a	0.171166	0	0	0	0	0	ENSDARG00000056395	onecut3a	22:20461487-20515347	EGFP	SATB2	NOTEST	0.0570553	0	#NAME?	0	1	1	no
ENSDARG00000056400	helt	0.382217	0	0	0	0	0	ENSDARG00000056400	helt	1:17593391-17595045	EGFP	SATB2	NOTEST	0.127406	0	#NAME?	0	1	1	no
ENSDARG00000056439	2019-03-04	0.255551	0	0.0779771	0	0	0	ENSDARG00000056439	42066	9:52492638-52539704	EGFP	SATB2	NOTEST	0.111176	0	#NAME?	0	1	1	no
ENSDARG00000056462	crp2	0.825176	0	0	0	0	0	ENSDARG00000056462	crp2	24:38082470-38092588	EGFP	SATB2	NOTEST	0.275059	0	#NAME?	0	1	1	no
ENSDARG00000056616	pimr48	0	0	0.0927351	0	0	0	ENSDARG00000056616	pimr48	13:13668990-13671097	EGFP	SATB2	NOTEST	0.0309117	0	#NAME?	0	1	1	no
ENSDARG00000056620	grpr	0.526732	0	0	0	0	0	ENSDARG00000056620	grpr	11:29856031-29877090	EGFP	SATB2	NOTEST	0.175577	0	#NAME?	0	1	1	no
ENSDARG00000056633	fgf13b	1.11639	0	0	0	0	0	ENSDARG00000056633	fgf13b	10:26716361-26744166	EGFP	SATB2	NOTEST	0.372131	0	#NAME?	0	1	1	no
ENSDARG00000056666	sp8b	0.127143	0	0	0	0	0	ENSDARG00000056666	sp8b	16:19536613-19568795	EGFP	SATB2	NOTEST	0.0423811	0	#NAME?	0	1	1	no
ENSDARG00000056732	her4.1	0	0	0.157436	0	0	0	ENSDARG00000056732	her4.1	23:21452556-21453614	EGFP	SATB2	NOTEST	0.0524787	0	#NAME?	0	1	1	no
ENSDARG00000056896	ttc12	0.365415	0.035916	0	0	0	0	ENSDARG00000056896	ttc12	15:21947116-21981546	EGFP	SATB2	NOTEST	0.133777	0	#NAME?	0	1	1	no
ENSDARG00000056915	si:ch211-237l4.6	0	0	0.214953	0	0	0	ENSDARG00000056915	si:ch211-237l4.6	10:22782521-22786450	EGFP	SATB2	NOTEST	0.071651	0	#NAME?	0	1	1	no
ENSDARG00000057027	rtn2b	0.12566	0	0	0	0	0	ENSDARG00000057027	rtn2b	21:21374276-21386120	EGFP	SATB2	NOTEST	0.0418867	0	#NAME?	0	1	1	no
ENSDARG00000057055	ndufs8b	0.277694	0	0	0	0	0	ENSDARG00000057055	ndufs8b	14:21671106-21678917	EGFP	SATB2	NOTEST	0.0925646	0	#NAME?	0	1	1	no
ENSDARG00000057253	pimr141	0.163819	0.946014	0	0	0	0	ENSDARG00000057253	pimr141	2:19505262-19513296	EGFP	SATB2	NOTEST	0.369944	0	#NAME?	0	1	1	no
ENSDARG00000057429	arg1	0.222872	0	0	0	0	0	ENSDARG00000057429	arg1	12:9597150-9617770	EGFP	SATB2	NOTEST	0.0742906	0	#NAME?	0	1	1	no
ENSDARG00000057536	crygm2a	0.24771	0	0	0	0	0	ENSDARG00000057536	crygm2a	9:22075527-22076368	EGFP	SATB2	NOTEST	0.08257	0	#NAME?	0	1	1	no
ENSDARG00000057728	slc17a8	0.249354	0	0.087929	0	0	0	ENSDARG00000057728	slc17a8	18:15616166-15635407	EGFP	SATB2	NOTEST	0.112428	0	#NAME?	0	1	1	no
ENSDARG00000057887	nts	0.388352	0	0	0	0	0	ENSDARG00000057887	nts	18:16330024-16339902	EGFP	SATB2	NOTEST	0.129451	0	#NAME?	0	1	1	no
ENSDARG00000057942	glt8d2	0.240212	0.343485	0.163034	0	0	0	ENSDARG00000057942	glt8d2	4:9843922-9867843	EGFP	SATB2	NOTEST	0.24891	0	#NAME?	0	1	1	no
ENSDARG00000058120	GPR83	0.659588	0	0	0	0	0	ENSDARG00000058120	GPR83	5:22363014-22369916	EGFP	SATB2	NOTEST	0.219863	0	#NAME?	0	1	1	no
ENSDARG00000058329	btr21	0.623065	0.118897	0	0	0	0	ENSDARG00000058329	btr21	15:18212189-18218227	EGFP	SATB2	NOTEST	0.247321	0	#NAME?	0	1	1	no
ENSDARG00000058336	slc25a22b	0.222814	0	0	0	0	0	ENSDARG00000058336	slc25a22b	7:12976172-12999913	EGFP	SATB2	NOTEST	0.0742712	0	#NAME?	0	1	1	no
ENSDARG00000058379	otpb	0.286134	0	0.0803631	0	0	0	ENSDARG00000058379	otpb	5:51615024-51619742	EGFP	SATB2	NOTEST	0.122166	0	#NAME?	0	1	1	no
ENSDARG00000058464	rasd3	0.236113	0	0.122339	0	0	0	ENSDARG00000058464	rasd3	1:9144957-9145896	EGFP	SATB2	NOTEST	0.119484	0	#NAME?	0	1	1	no
ENSDARG00000058476	stc1l	0.221124	0	0	0	0	0	ENSDARG00000058476	stc1l	10:42677890-42716739	EGFP	SATB2	NOTEST	0.0737081	0	#NAME?	0	1	1	no
ENSDARG00000058535	si:dkey-211g8.7	0.252948	0	0	0	0	0	ENSDARG00000058535	si:dkey-211g8.7	19:10624643-10627752	EGFP	SATB2	NOTEST	0.0843161	0	#NAME?	0	1	1	no
ENSDARG00000058547	si:ch73-160i9.3	0.216566	0	0	0	0	0	ENSDARG00000058547	si:ch73-160i9.3	19:10527227-10528344	EGFP	SATB2	NOTEST	0.0721888	0	#NAME?	0	1	1	no
ENSDARG00000058578	ccdc106b	0.329348	0	0	0	0	0	ENSDARG00000058578	ccdc106b	19:10325359-10330831	EGFP	SATB2	NOTEST	0.109783	0	#NAME?	0	1	1	no
ENSDARG00000058601	gdap1	0.174024	0	0	0	0	0	ENSDARG00000058601	gdap1	24:14713775-14725763	EGFP	SATB2	NOTEST	0.058008	0	#NAME?	0	1	1	no
ENSDARG00000058701	nos1apb	0.331609	0	0	0	0	0	ENSDARG00000058701	nos1apb	2:6926099-6952754	EGFP	SATB2	NOTEST	0.110536	0	#NAME?	0	1	1	no
ENSDARG00000058702	vax2	0	0.878962	0	0	0	0	ENSDARG00000058702	vax2	7:8844284-8881514	EGFP	SATB2	NOTEST	0.292987	0	#NAME?	0	1	1	no
ENSDARG00000058733	ihha	0.0671846	0	0	0	0	0	ENSDARG00000058733	ihha	9:7357818-7367278	EGFP	SATB2	NOTEST	0.0223949	0	#NAME?	0	1	1	no
ENSDARG00000058876	mmp16b	0.0373117	0	0	0	0	0	ENSDARG00000058876	mmp16b	2:3630306-3678029	EGFP	SATB2	NOTEST	0.0124372	0	#NAME?	0	1	1	no
ENSDARG00000058937	cldn10a	0.199158	0	0	0	0	0	ENSDARG00000058937	cldn10a	6:7299193-7306056	EGFP	SATB2	NOTEST	0.066386	0	#NAME?	0	1	1	no
ENSDARG00000059090	sstr2a	0.809634	0	0.175801	0	0	0	ENSDARG00000059090	sstr2a	12:1556146-1557286	EGFP	SATB2	NOTEST	0.328479	0	#NAME?	0	1	1	no
ENSDARG00000059315	ora3	0.14182	0	0	0	0	0	ENSDARG00000059315	ora3	22:381142-382955	EGFP	SATB2	NOTEST	0.0472735	0	#NAME?	0	1	1	no
ENSDARG00000059347	calml4b	0.581454	0	0	0	0	0	ENSDARG00000059347	calml4b	25:1266944-1323928	EGFP	SATB2	NOTEST	0.193818	0	#NAME?	0	1	1	no
ENSDARG00000059574	fscn2a	0.241306	0	0.151165	0	0	0	ENSDARG00000059574	fscn2a	3:57234092-57257075	EGFP	SATB2	NOTEST	0.130824	0	#NAME?	0	1	1	no
ENSDARG00000059616	hs3st2	0.447843	0	0	0	0	0	ENSDARG00000059616	hs3st2	3:44947354-45000645	EGFP	SATB2	NOTEST	0.149281	0	#NAME?	0	1	1	no
ENSDARG00000059951	pld6	0.240501	0	0	0	0	0	ENSDARG00000059951	pld6	1:52203008-52210950	EGFP	SATB2	NOTEST	0.080167	0	#NAME?	0	1	1	no
ENSDARG00000060035	rnf32	0.202719	0.0890155	0	0	0	0	ENSDARG00000060035	rnf32	7:40715755-40738774	EGFP	SATB2	NOTEST	0.0972447	0	#NAME?	0	1	1	no
ENSDARG00000060303	slc4a10b	0.269107	0.170927	0	0	0	0	ENSDARG00000060303	slc4a10b	9:51289903-51370293	EGFP	SATB2	NOTEST	0.146678	0	#NAME?	0	1	1	no
ENSDARG00000060400	gpr185a	0	0.216825	0	0	0	0	ENSDARG00000060400	gpr185a	21:43559122-43562630	EGFP	SATB2	NOTEST	0.072275	0	#NAME?	0	1	1	no
ENSDARG00000060702	npffr2b	0.783291	0	0	0	0	0	ENSDARG00000060702	npffr2b	5:33067282-33104366	EGFP	SATB2	NOTEST	0.261097	0	#NAME?	0	1	1	no
ENSDARG00000061070	chst3a	0.646509	0	0	0	0	0	ENSDARG00000061070	chst3a	13:29506659-29701742	EGFP	SATB2	NOTEST	0.215503	0	#NAME?	0	1	1	no
ENSDARG00000061432	zgc:194330	0.193898	0.0443643	0.0738547	0	0	0	ENSDARG00000061432	zgc:194330	22:26519298-26524596	EGFP	SATB2	NOTEST	0.104039	0	#NAME?	0	1	1	no
ENSDARG00000061835	zpld1a	0	0	0.115793	0	0	0	ENSDARG00000061835	zpld1a	10:29112755-29120535	EGFP	SATB2	NOTEST	0.0385978	0	#NAME?	0	1	1	no
ENSDARG00000061883	v2rh10	0.196233	0	0.074017	0	0	0	ENSDARG00000061883	v2rh10	18:33420994-33424553	EGFP	SATB2	NOTEST	0.0900835	0	#NAME?	0	1	1	no
ENSDARG00000061903	v2ra18	0.624155	0	0	0	0	0	ENSDARG00000061903	v2ra18	18:33322514-33331641	EGFP	SATB2	NOTEST	0.208052	0	#NAME?	0	1	1	no
ENSDARG00000061963	vrtn	0.317525	0.0735631	0	0	0	0	ENSDARG00000061963	vrtn	20:27749132-27755014	EGFP	SATB2	NOTEST	0.130363	0	#NAME?	0	1	1	no
ENSDARG00000062077	acsbg1	0.279619	0	0	0	0	0	ENSDARG00000062077	acsbg1	25:25993239-26018424	EGFP	SATB2	NOTEST	0.0932064	0	#NAME?	0	1	1	no
ENSDARG00000062084	clcn1a	0.314424	0	0.0465246	0	0	0	ENSDARG00000062084	clcn1a	19:9612162-9662958	EGFP	SATB2	NOTEST	0.120316	0	#NAME?	0	1	1	no
ENSDARG00000062182	slc22a7b.3	0.424134	0	0	0	0	0	ENSDARG00000062182	slc22a7b.3	17:21964471-21993707	EGFP	SATB2	NOTEST	0.141378	0	#NAME?	0	1	1	no
ENSDARG00000062228	adipoqa	0.923866	0	0.114089	0	0	0	ENSDARG00000062228	adipoqa	24:26276804-26283359	EGFP	SATB2	NOTEST	0.345985	0	#NAME?	0	1	1	no
ENSDARG00000062293	qpctlb	0.390605	0	0	0	0	0	ENSDARG00000062293	qpctlb	21:21325499-21336437	EGFP	SATB2	NOTEST	0.130202	0	#NAME?	0	1	1	no
ENSDARG00000062429	trim109	0.495409	0	0.0583312	0	0	0	ENSDARG00000062429	trim109	16:14064396-14074594	EGFP	SATB2	NOTEST	0.18458	0	#NAME?	0	1	1	no
ENSDARG00000062446	neurl2	0.170741	0	0.100945	0	0	0	ENSDARG00000062446	neurl2	12:18524952-18527221	EGFP	SATB2	NOTEST	0.0905621	0	#NAME?	0	1	1	no
ENSDARG00000062478	ackr3a	0.968814	0	0.128831	0	0	0	ENSDARG00000062478	ackr3a	9:24043779-24050257	EGFP	SATB2	NOTEST	0.365882	0	#NAME?	0	1	1	no
ENSDARG00000062849	kcnk10a	0.314942	0	0	0	0	0	ENSDARG00000062849	kcnk10a	20:10166296-10220280	EGFP	SATB2	NOTEST	0.104981	0	#NAME?	0	1	1	no
ENSDARG00000063059	abcg8	0.421367	0.0460694	0	0	0	0	ENSDARG00000063059	abcg8	13:10926527-10968607	EGFP	SATB2	NOTEST	0.155812	0	#NAME?	0	1	1	no
ENSDARG00000063078	abcg5	0.337899	0	0	0	0	0	ENSDARG00000063078	abcg5	13:10926527-10968607	EGFP	SATB2	NOTEST	0.112633	0	#NAME?	0	1	1	no
ENSDARG00000063088	si:dkey-211g8.6	1.32461	0	0	0	0	0	ENSDARG00000063088	si:dkey-211g8.6	19:10611787-10612774	EGFP	SATB2	NOTEST	0.441536	0	#NAME?	0	1	1	no
ENSDARG00000063129	si:ch211-38m6.7	0.421559	0	0	0	0	0	ENSDARG00000063129	si:ch211-38m6.7	2:7831913-7845110	EGFP	SATB2	NOTEST	0.14052	0	#NAME?	0	1	1	no
ENSDARG00000063158	CABZ01081780.1	0.476225	0.307441	0.0932177	0	0	0	ENSDARG00000063158	CABZ01081780.1	7:73332485-73402030	EGFP	SATB2	NOTEST	0.292294	0	#NAME?	0	1	1	no
ENSDARG00000067781	urp2	0.323324	0	0	0	0	0	ENSDARG00000067781	urp2	1:1599978-1614500	EGFP	SATB2	NOTEST	0.107775	0	#NAME?	0	1	1	no
ENSDARG00000067813	zgc:171844	0	0	0.0846242	0	0	0	ENSDARG00000067813	zgc:171844	3:25857007-25894124	EGFP	SATB2	NOTEST	0.0282081	0	#NAME?	0	1	1	no
ENSDARG00000067828	si:ch211-229c8.13	0.372217	0	0	0	0	0	ENSDARG00000067828	si:ch211-229c8.13	18:33100605-33103808	EGFP	SATB2	NOTEST	0.124072	0	#NAME?	0	1	1	no
ENSDARG00000067848	nmrk2	1.38061	0	0	0	0	0	ENSDARG00000067848	nmrk2	2:55890672-56003799	EGFP	SATB2	NOTEST	0.460202	0	#NAME?	0	1	1	no
ENSDARG00000067990	myhz1.1	0.014557	0	0	0	0	0	ENSDARG00000067990	myhz1.1	5:32298623-32309129	EGFP	SATB2	NOTEST	0.00485233	0	#NAME?	0	1	1	no
ENSDARG00000068065	BX664721.2	0.860092	0	0.226642	0	0	0	ENSDARG00000068065	BX664721.2	7:73713798-73717082	EGFP	SATB2	NOTEST	0.362245	0	#NAME?	0	1	1	no
ENSDARG00000068085	CT573494.1	0.455817	0	0	0	0	0	ENSDARG00000068085	CT573494.1	7:65965299-65968838	EGFP	SATB2	NOTEST	0.151939	0	#NAME?	0	1	1	no
ENSDARG00000068181	dpep1	0.824671	0	0	0	0	0	ENSDARG00000068181	dpep1	7:56615553-56637406	EGFP	SATB2	NOTEST	0.27489	0	#NAME?	0	1	1	no
ENSDARG00000068220	mbl2	0.637519	0	0.155975	0	0	0	ENSDARG00000068220	mbl2	2:37887276-37889152	EGFP	SATB2	NOTEST	0.264498	0	#NAME?	0	1	1	no
ENSDARG00000068232	cbln12	0.743383	0	0	0	0	0	ENSDARG00000068232	cbln12	2:38121414-38125657	EGFP	SATB2	NOTEST	0.247794	0	#NAME?	0	1	1	no
ENSDARG00000068363	si:ch211-132b12.3	0.23285	0	0	0	0	0	ENSDARG00000068363	si:ch211-132b12.3	18:40584287-40604363	EGFP	SATB2	NOTEST	0.0776167	0	#NAME?	0	1	1	no
ENSDARG00000068372	zgc:158427	0.299998	0	0	0	0	0	ENSDARG00000068372	zgc:158427	18:40617716-40638096	EGFP	SATB2	NOTEST	0.0999995	0	#NAME?	0	1	1	no
ENSDARG00000068520	v2rh14	0.670695	0	0	0	0	0	ENSDARG00000068520	v2rh14	18:33340867-33344315	EGFP	SATB2	NOTEST	0.223565	0	#NAME?	0	1	1	no
ENSDARG00000068551	elovl8a	0.537059	0	0	0	0	0	ENSDARG00000068551	elovl8a	2:27403299-27409706	EGFP	SATB2	NOTEST	0.17902	0	#NAME?	0	1	1	no
ENSDARG00000068566	olfcq19	0.595611	0	0	0	0	0	ENSDARG00000068566	olfcq19	18:33818576-33821891	EGFP	SATB2	NOTEST	0.198537	0	#NAME?	0	1	1	no
ENSDARG00000068576	olfcd3	0.362151	0	0	0	0	0	ENSDARG00000068576	olfcd3	18:33090442-33093741	EGFP	SATB2	NOTEST	0.120717	0	#NAME?	0	1	1	no
ENSDARG00000068586	CU302253.1	0.0840205	0.0490563	0.0305741	0	0	0	ENSDARG00000068586	CU302253.1	14:50839281-50892442	EGFP	SATB2	NOTEST	0.0545503	0	#NAME?	0	1	1	no
ENSDARG00000068678	iqcg	0.10454	0	0	0	0	0	ENSDARG00000068678	iqcg	18:27843775-27897217	EGFP	SATB2	NOTEST	0.0348466	0	#NAME?	0	1	1	no
ENSDARG00000068704	or108-1	0.168032	0	0	0	0	0	ENSDARG00000068704	or108-1	10:36194526-36196218	EGFP	SATB2	NOTEST	0.0560105	0	#NAME?	0	1	1	no
ENSDARG00000068846	zgc:66024	0.23649	0	0	0	0	0	ENSDARG00000068846	zgc:66024	15:34899644-34938844	EGFP	SATB2	NOTEST	0.0788301	0	#NAME?	0	1	1	no
ENSDARG00000068934	cyp1b1	0.671171	0.166847	0.0486135	0	0	0	ENSDARG00000068934	cyp1b1	13:42011284-42018948	EGFP	SATB2	NOTEST	0.295544	0	#NAME?	0	1	1	no
ENSDARG00000068947	si:ch211-264e16.1	0.290445	0	0	0	0	0	ENSDARG00000068947	si:ch211-264e16.1	18:15706159-15718931	EGFP	SATB2	NOTEST	0.0968149	0	#NAME?	0	1	1	no
ENSDARG00000068976	bsx	0.314523	0	0	0	0	0	ENSDARG00000068976	bsx	10:29890534-29892486	EGFP	SATB2	NOTEST	0.104841	0	#NAME?	0	1	1	no
ENSDARG00000069011	eps8b	0.503561	0	0	0	0	0	ENSDARG00000069011	eps8b	18:16387744-16590056	EGFP	SATB2	NOTEST	0.167854	0	#NAME?	0	1	1	no
ENSDARG00000069033	pimr51	0	0.132323	0	0	0	0	ENSDARG00000069033	pimr51	2:19574495-19630297	EGFP	SATB2	NOTEST	0.0441077	0	#NAME?	0	1	1	no
ENSDARG00000069058	lgals9l4	0	0	0.139074	0	0	0	ENSDARG00000069058	lgals9l4	15:31022013-31027112	EGFP	SATB2	NOTEST	0.0463579	0	#NAME?	0	1	1	no
ENSDARG00000069206	taar15	0.435058	0	0	0	0	0	ENSDARG00000069206	taar15	20:46164337-46249185	EGFP	SATB2	NOTEST	0.145019	0	#NAME?	0	1	1	no
ENSDARG00000069214	taar10	0.140493	0	0.441412	0	0	0	ENSDARG00000069214	taar10	20:46164337-46249185	EGFP	SATB2	NOTEST	0.193968	0	#NAME?	0	1	1	no
ENSDARG00000069260	rec8b	0.0593439	0.0514987	0.0577599	0	0	0	ENSDARG00000069260	rec8b	24:12690162-12734583	EGFP	SATB2	NOTEST	0.0562009	0	#NAME?	0	1	1	no
ENSDARG00000069265	matn3b	0.649806	0	0	0	0	0	ENSDARG00000069265	matn3b	13:32627443-32635885	EGFP	SATB2	NOTEST	0.216602	0	#NAME?	0	1	1	no
ENSDARG00000069276	pimr132	0.105261	0	0	0	0	0	ENSDARG00000069276	pimr132	20:43491525-43495506	EGFP	SATB2	NOTEST	0.035087	0	#NAME?	0	1	1	no
ENSDARG00000069293	ahsg2	0.655959	0	0	0	0	0	ENSDARG00000069293	ahsg2	2:10134344-10141741	EGFP	SATB2	NOTEST	0.218653	0	#NAME?	0	1	1	no
ENSDARG00000069323	si:ch73-122g19.1	0	0.096917	0	0	0	0	ENSDARG00000069323	si:ch73-122g19.1	10:23441487-23443074	EGFP	SATB2	NOTEST	0.0323057	0	#NAME?	0	1	1	no
ENSDARG00000069327	nkx3.3	0.893529	0	0.0803437	0	0	0	ENSDARG00000069327	nkx3.3	13:40397516-40401870	EGFP	SATB2	NOTEST	0.324624	0	#NAME?	0	1	1	no
ENSDARG00000069361	spa17	0.0580993	0	0	0	0	0	ENSDARG00000069361	spa17	15:22267846-22286918	EGFP	SATB2	NOTEST	0.0193664	0	#NAME?	0	1	1	no
ENSDARG00000069374	sh2d4ba	0.361223	0	0	0	0	0	ENSDARG00000069374	sh2d4ba	13:21600945-21621856	EGFP	SATB2	NOTEST	0.120408	0	#NAME?	0	1	1	no
ENSDARG00000069607	zgc:162331	0.149981	0	0	0	0	0	ENSDARG00000069607	zgc:162331	4:4782720-4795205	EGFP	SATB2	NOTEST	0.0499936	0	#NAME?	0	1	1	no
ENSDARG00000069660	chrnb1	0.81918	0	0.104472	0	0	0	ENSDARG00000069660	chrnb1	7:22543962-22580026	EGFP	SATB2	NOTEST	0.307884	0	#NAME?	0	1	1	no
ENSDARG00000069737	pou4f2	0.120496	0	0	0	0	0	ENSDARG00000069737	pou4f2	1:36436935-36440301	EGFP	SATB2	NOTEST	0.0401655	0	#NAME?	0	1	1	no
ENSDARG00000069739	fndc5a	0.785756	0	0.0803993	0	0	0	ENSDARG00000069739	fndc5a	13:45786112-45811137	EGFP	SATB2	NOTEST	0.288718	0	#NAME?	0	1	1	no
ENSDARG00000069748	capn5b	0.390304	0	0	0	0	0	ENSDARG00000069748	capn5b	21:22158743-22214734	EGFP	SATB2	NOTEST	0.130101	0	#NAME?	0	1	1	no
ENSDARG00000069773	nitr1b	0.345569	0	0	0	0	0	ENSDARG00000069773	nitr1b	7:17559928-17600540	EGFP	SATB2	NOTEST	0.11519	0	#NAME?	0	1	1	no
ENSDARG00000069801	crygm2d12	0	0	0.186835	0	0	0	ENSDARG00000069801	crygm2d12	9:22204676-22205682	EGFP	SATB2	NOTEST	0.0622784	0	#NAME?	0	1	1	no
ENSDARG00000069817	crygm2d17	0.262638	0	0	0	0	0	ENSDARG00000069817	crygm2d17	9:22127116-22129839	EGFP	SATB2	NOTEST	0.087546	0	#NAME?	0	1	1	no
ENSDARG00000069848	nitr1b	0.523923	0	0	0	0	0	ENSDARG00000069848	nitr1b	7:17400444-17458631	EGFP	SATB2	NOTEST	0.174641	0	#NAME?	0	1	1	no
ENSDARG00000069866	sox1a	0.123026	0	0	0	0	0	ENSDARG00000069866	sox1a	9:21722732-21724661	EGFP	SATB2	NOTEST	0.0410085	0	#NAME?	0	1	1	no
ENSDARG00000070013	dmrt2b	0.0807477	0	0	0	0	0	ENSDARG00000070013	dmrt2b	6:34213970-34220641	EGFP	SATB2	NOTEST	0.0269159	0	#NAME?	0	1	1	no
ENSDARG00000070039	AL935184.1	0	0.261351	0	0	0	0	ENSDARG00000070039	AL935184.1	1:25709812-25711803	EGFP	SATB2	NOTEST	0.087117	0	#NAME?	0	1	1	no
ENSDARG00000070168	sod3a	0.116554	0	0	0	0	0	ENSDARG00000070168	sod3a	7:71335814-71339294	EGFP	SATB2	NOTEST	0.0388512	0	#NAME?	0	1	1	no
ENSDARG00000070394	uroc1	0.248886	0.0424768	0	0	0	0	ENSDARG00000070394	uroc1	6:40039533-40058686	EGFP	SATB2	NOTEST	0.0971211	0	#NAME?	0	1	1	no
ENSDARG00000070414	si:dkey-61f9.1	0	0	0.0788412	0	0	0	ENSDARG00000070414	si:dkey-61f9.1	4:3806257-3811017	EGFP	SATB2	NOTEST	0.0262804	0	#NAME?	0	1	1	no
ENSDARG00000070504	trpc5a	0.594458	0.0611138	0.110758	0	0	0	ENSDARG00000070504	trpc5a	1:10378705-10620459	EGFP	SATB2	NOTEST	0.255444	0	#NAME?	0	1	1	no
ENSDARG00000070575	fam131bb	0.143982	0	0	0	0	0	ENSDARG00000070575	fam131bb	16:17389115-17467462	EGFP	SATB2	NOTEST	0.0479939	0	#NAME?	0	1	1	no
ENSDARG00000070611	zgc:152986	0	0	0.228273	0	0	0	ENSDARG00000070611	zgc:152986	6:40467561-40470521	EGFP	SATB2	NOTEST	0.0760911	0	#NAME?	0	1	1	no
ENSDARG00000070724	chrna4b	0.111535	0	0	0	0	0	ENSDARG00000070724	chrna4b	11:12982259-12998400	EGFP	SATB2	NOTEST	0.0371785	0	#NAME?	0	1	1	no
ENSDARG00000070730	gabra5	0.223259	0	0	0	0	0	ENSDARG00000070730	gabra5	6:38366935-38513578	EGFP	SATB2	NOTEST	0.0744196	0	#NAME?	0	1	1	no
ENSDARG00000070770	her4.3	0	0.0699451	0	0	0	0	ENSDARG00000070770	her4.3	23:21455151-21461140	EGFP	SATB2	NOTEST	0.023315	0	#NAME?	0	1	1	no
ENSDARG00000070781	gjd2b	0.605525	0	0	0	0	0	ENSDARG00000070781	gjd2b	20:9958505-9963713	EGFP	SATB2	NOTEST	0.201842	0	#NAME?	0	1	1	no
ENSDARG00000070857	si:dkey-32e6.6	0.701275	0	0	0	0	0	ENSDARG00000070857	si:dkey-32e6.6	23:20068879-20100436	EGFP	SATB2	NOTEST	0.233758	0	#NAME?	0	1	1	no
ENSDARG00000070918	si:ch211-284e20.8	0.473955	0	0	0	0	0	ENSDARG00000070918	si:ch211-284e20.8	22:38229320-38240168	EGFP	SATB2	NOTEST	0.157985	0	#NAME?	0	1	1	no
ENSDARG00000070954	hmx2	0.105558	0	0	0	0	0	ENSDARG00000070954	hmx2	17:21760031-21822840	EGFP	SATB2	NOTEST	0.035186	0	#NAME?	0	1	1	no
ENSDARG00000070960	si:ch211-288g17.4	0.237246	0	0	0	0	0	ENSDARG00000070960	si:ch211-288g17.4	19:9344170-9364342	EGFP	SATB2	NOTEST	0.0790819	0	#NAME?	0	1	1	no
ENSDARG00000071085	adgrg7.2	0.243073	0	0	0	0	0	ENSDARG00000071085	adgrg7.2	22:28610371-28624879	EGFP	SATB2	NOTEST	0.0810244	0	#NAME?	0	1	1	no
ENSDARG00000071310	si:dkey-78l4.5	0.160857	0	0	0	0	0	ENSDARG00000071310	si:dkey-78l4.5	22:19188808-19428807	EGFP	SATB2	NOTEST	0.053619	0	#NAME?	0	1	1	no
ENSDARG00000071496	zic6	0.112585	0	0	0	0	0	ENSDARG00000071496	zic6	14:31905234-32057696	EGFP	SATB2	NOTEST	0.0375283	0	#NAME?	0	1	1	no
ENSDARG00000071601	pvalb9	0.110918	0	0	0	0	0	ENSDARG00000071601	pvalb9	12:17695985-17698669	EGFP	SATB2	NOTEST	0.0369728	0	#NAME?	0	1	1	no
ENSDARG00000071735	prlh2	0.345027	0	0	0	0	0	ENSDARG00000071735	prlh2	24:11105785-11110087	EGFP	SATB2	NOTEST	0.115009	0	#NAME?	0	1	1	no
ENSDARG00000071745	pimr46	0	0	0.108104	0	0	0	ENSDARG00000071745	pimr46	12:9250106-9252051	EGFP	SATB2	NOTEST	0.0360345	0	#NAME?	0	1	1	no
ENSDARG00000073720	RNF180	0.781034	0	0	0	0	0	ENSDARG00000073720	RNF180	8:31923857-31938364	EGFP	SATB2	NOTEST	0.260345	0	#NAME?	0	1	1	no
ENSDARG00000073742	prss59.2	0.168133	0	0	0	0	0	ENSDARG00000073742	prss59.2	16:26017359-26018694	EGFP	SATB2	NOTEST	0.0560444	0	#NAME?	0	1	1	no
ENSDARG00000073814	pax1b	0.369458	0	0	0	0	0	ENSDARG00000073814	pax1b	20:48694055-48701593	EGFP	SATB2	NOTEST	0.123153	0	#NAME?	0	1	1	no
ENSDARG00000074179	CALHM2 (1 of many)	0.886656	0	0	0	0	0	ENSDARG00000074179	CALHM2 (1 of many)	13:25418560-25426955	EGFP	SATB2	NOTEST	0.295552	0	#NAME?	0	1	1	no
ENSDARG00000074265	dzip1l	0.0360992	0	0	0	0	0	ENSDARG00000074265	dzip1l	6:26309967-26353179	EGFP	SATB2	NOTEST	0.0120331	0	#NAME?	0	1	1	no
ENSDARG00000074320	CABZ01083937.1	0	0.217125	0	0	0	0	ENSDARG00000074320	CABZ01083937.1	5:68112193-68190264	EGFP	SATB2	NOTEST	0.0723752	0	#NAME?	0	1	1	no
ENSDARG00000074387	alkal1	0.417649	0	0.45351	0	0	0	ENSDARG00000074387	alkal1	8:18460806-18488221	EGFP	SATB2	NOTEST	0.290386	0	#NAME?	0	1	1	no
ENSDARG00000074666	zgc:153760	0	0.11984	0	0	0	0	ENSDARG00000074666	zgc:153760	12:4308521-4317165	EGFP	SATB2	NOTEST	0.0399466	0	#NAME?	0	1	1	no
ENSDARG00000074813	btr05	0.248245	0	0	0	0	0	ENSDARG00000074813	btr05	7:16196902-16205471	EGFP	SATB2	NOTEST	0.0827482	0	#NAME?	0	1	1	no
ENSDARG00000074816	si:zfos-367g9.1	0	0	0.221831	0	0	0	ENSDARG00000074816	si:zfos-367g9.1	8:36354124-36362830	EGFP	SATB2	NOTEST	0.0739436	0	#NAME?	0	1	1	no
ENSDARG00000074897	hes2.1	0.35953	0	0	0	0	0	ENSDARG00000074897	hes2.1	8:46921332-46926259	EGFP	SATB2	NOTEST	0.119843	0	#NAME?	0	1	1	no
ENSDARG00000075134	adgrf11	0.0729223	0.179887	0	0	0	0	ENSDARG00000075134	adgrf11	20:35517571-35536676	EGFP	SATB2	NOTEST	0.0842699	0	#NAME?	0	1	1	no
ENSDARG00000075170	zdhhc22	0.0739973	0.0999446	0.0979946	0	0	0	ENSDARG00000075170	zdhhc22	17:44767724-44776224	EGFP	SATB2	NOTEST	0.0906455	0	#NAME?	0	1	1	no
ENSDARG00000075177	ribc2	0.382527	0.129074	0	0	0	0	ENSDARG00000075177	ribc2	25:16706100-16782394	EGFP	SATB2	NOTEST	0.170534	0	#NAME?	0	1	1	no
ENSDARG00000075193	BX908780.1	1.05769	0	0	0	0	0	ENSDARG00000075193	BX908780.1	1:29174194-29202689	EGFP	SATB2	NOTEST	0.352565	0	#NAME?	0	1	1	no
ENSDARG00000075330	phox2ba	0.144903	0	0	0	0	0	ENSDARG00000075330	phox2ba	1:19074325-19079957	EGFP	SATB2	NOTEST	0.048301	0	#NAME?	0	1	1	no
ENSDARG00000075403	gpha2	0.738262	0.248146	0	0	0	0	ENSDARG00000075403	gpha2	7:25109699-25112402	EGFP	SATB2	NOTEST	0.328803	0	#NAME?	0	1	1	no
ENSDARG00000075463	mss51	0.582191	0	0	0	0	0	ENSDARG00000075463	mss51	24:39105050-39114123	EGFP	SATB2	NOTEST	0.194064	0	#NAME?	0	1	1	no
ENSDARG00000075480	si:dkey-63d15.12	0.478893	0	0.3302	0	0	0	ENSDARG00000075480	si:dkey-63d15.12	8:39650939-39654669	EGFP	SATB2	NOTEST	0.269698	0	#NAME?	0	1	1	no
ENSDARG00000075541	si:ch73-236c18.3	0.131034	0	0.0744428	0	0	0	ENSDARG00000075541	si:ch73-236c18.3	1:58312186-58466934	EGFP	SATB2	NOTEST	0.0684923	0	#NAME?	0	1	1	no
ENSDARG00000075562	si:ch211-119o8.4	0.14204	0	0	0	0	0	ENSDARG00000075562	si:ch211-119o8.4	2:38892630-38909401	EGFP	SATB2	NOTEST	0.0473466	0	#NAME?	0	1	1	no
ENSDARG00000075676	fndc7b	0.370419	0.165951	0	0	0	0	ENSDARG00000075676	fndc7b	23:1586286-1587955	EGFP	SATB2	NOTEST	0.17879	0	#NAME?	0	1	1	no
ENSDARG00000075714	si:dkey-27p23.3	0.157175	0	0	0	0	0	ENSDARG00000075714	si:dkey-27p23.3	5:57901167-57920600	EGFP	SATB2	NOTEST	0.0523916	0	#NAME?	0	1	1	no
ENSDARG00000075812	kcnt2	0.350484	0	0	0	0	0	ENSDARG00000075812	kcnt2	2:12019340-12079718	EGFP	SATB2	NOTEST	0.116828	0	#NAME?	0	1	1	no
ENSDARG00000075837	si:dkey-1d7.3	0.319205	0	0	0	0	0	ENSDARG00000075837	si:dkey-1d7.3	21:18405584-18445953	EGFP	SATB2	NOTEST	0.106402	0	#NAME?	0	1	1	no
ENSDARG00000075858	fam155a	0.872425	0	0	0	0	0	ENSDARG00000075858	fam155a	1:29281763-29391034	EGFP	SATB2	NOTEST	0.290808	0	#NAME?	0	1	1	no
ENSDARG00000075929	si:dkey-219c10.4	0.0871081	0	0	0	0	0	ENSDARG00000075929	si:dkey-219c10.4	9:38140910-38156894	EGFP	SATB2	NOTEST	0.029036	0	#NAME?	0	1	1	no
ENSDARG00000075958	si:dkey-266f7.9	0.227466	0	0	0	0	0	ENSDARG00000075958	si:dkey-266f7.9	19:8086490-8096984	EGFP	SATB2	NOTEST	0.075822	0	#NAME?	0	1	1	no
ENSDARG00000076122	si:ch211-160b11.4	0.330697	0	0	0	0	0	ENSDARG00000076122	si:ch211-160b11.4	9:34978866-34986827	EGFP	SATB2	NOTEST	0.110232	0	#NAME?	0	1	1	no
ENSDARG00000076126	actc1a	0.104675	0	0	0	0	0	ENSDARG00000076126	actc1a	19:47549567-47555956	EGFP	SATB2	NOTEST	0.0348917	0	#NAME?	0	1	1	no
ENSDARG00000076132	siglec15l	0	0	0.180309	0	0	0	ENSDARG00000076132	siglec15l	16:41505254-41515717	EGFP	SATB2	NOTEST	0.0601029	0	#NAME?	0	1	1	no
ENSDARG00000076137	si:dkey-98f17.3	0.909141	0	0	0	0	0	ENSDARG00000076137	si:dkey-98f17.3	5:12713257-12713920	EGFP	SATB2	NOTEST	0.303047	0	#NAME?	0	1	1	no
ENSDARG00000076183	frrs1a	0.116221	0	0.101876	0	0	0	ENSDARG00000076183	frrs1a	2:20444476-20470140	EGFP	SATB2	NOTEST	0.0726991	0	#NAME?	0	1	1	no
ENSDARG00000076186	lrrc3cb	0.586558	0	0	0	0	0	ENSDARG00000076186	lrrc3cb	3:16771796-16774074	EGFP	SATB2	NOTEST	0.195519	0	#NAME?	0	1	1	no
ENSDARG00000076262	pou3f2b	0.0448377	0	0	0	0	0	ENSDARG00000076262	pou3f2b	16:32559820-32563092	EGFP	SATB2	NOTEST	0.0149459	0	#NAME?	0	1	1	no
ENSDARG00000076448	serpinf2a	0.318901	0	0	0	0	0	ENSDARG00000076448	serpinf2a	21:40092300-40104916	EGFP	SATB2	NOTEST	0.1063	0	#NAME?	0	1	1	no
ENSDARG00000076495	vwc2	0.214608	0.10542	0	0	0	0	ENSDARG00000076495	vwc2	13:16150653-16191674	EGFP	SATB2	NOTEST	0.106676	0	#NAME?	0	1	1	no
ENSDARG00000076778	si:ch73-343l4.5	0.93353	0	0	0	0	0	ENSDARG00000076778	si:ch73-343l4.5	1:55908577-55918530	EGFP	SATB2	NOTEST	0.311177	0	#NAME?	0	1	1	no
ENSDARG00000076790	crygm2d16	0	0.182577	0	0	0	0	ENSDARG00000076790	crygm2d16	9:22146300-22158784	EGFP	SATB2	NOTEST	0.060859	0	#NAME?	0	1	1	no
ENSDARG00000076857	her3	0.339832	0	0	0	0	0	ENSDARG00000076857	her3	8:46641313-46642556	EGFP	SATB2	NOTEST	0.113277	0	#NAME?	0	1	1	no
ENSDARG00000076949	zgc:173837	0.177474	0	0.0955257	0	0	0	ENSDARG00000076949	zgc:173837	10:19595008-19598009	EGFP	SATB2	NOTEST	0.091	0	#NAME?	0	1	1	no
ENSDARG00000076978	pmchl	0.60828	0	0	0	0	0	ENSDARG00000076978	pmchl	5:54685174-54685710	EGFP	SATB2	NOTEST	0.20276	0	#NAME?	0	1	1	no
ENSDARG00000077021	calhm1	0.957768	0	0	0	0	0	ENSDARG00000077021	calhm1	13:25412306-25417915	EGFP	SATB2	NOTEST	0.319256	0	#NAME?	0	1	1	no
ENSDARG00000077058	zgc:92511	0.0962123	0	0.100561	0	0	0	ENSDARG00000077058	zgc:92511	22:7742210-7754391	EGFP	SATB2	NOTEST	0.0655911	0	#NAME?	0	1	1	no
ENSDARG00000077290	mmp25a	0.52327	0	0	0	0	0	ENSDARG00000077290	mmp25a	3:32587009-32650278	EGFP	SATB2	NOTEST	0.174423	0	#NAME?	0	1	1	no
ENSDARG00000077382	si:rp71-68n21.12	1.09978	0	0	0	0	0	ENSDARG00000077382	si:rp71-68n21.12	9:21243334-21257516	EGFP	SATB2	NOTEST	0.366592	0	#NAME?	0	1	1	no
ENSDARG00000077475	zgc:174353	0.313044	0	0	0	0	0	ENSDARG00000077475	zgc:174353	11:12703522-12744082	EGFP	SATB2	NOTEST	0.104348	0	#NAME?	0	1	1	no
ENSDARG00000077557	nitr5	0.40581	0	0	0	0	0	ENSDARG00000077557	nitr5	7:17559928-17600540	EGFP	SATB2	NOTEST	0.13527	0	#NAME?	0	1	1	no
ENSDARG00000077665	pimr140	0.162856	0.727655	0	0	0	0	ENSDARG00000077665	pimr140	2:19539679-19565273	EGFP	SATB2	NOTEST	0.296837	0	#NAME?	0	1	1	no
ENSDARG00000077687	rp1	1.07762	0	0	0	0	0	ENSDARG00000077687	rp1	2:30732885-30734098	EGFP	SATB2	NOTEST	0.359207	0	#NAME?	0	1	1	no
ENSDARG00000078034	zgc:112001	0.0576249	0	0	0	0	0	ENSDARG00000078034	zgc:112001	20:84691-90255	EGFP	SATB2	NOTEST	0.0192083	0	#NAME?	0	1	1	no
ENSDARG00000078087	CNNM1	0.144627	0	0	0	0	0	ENSDARG00000078087	CNNM1	13:40462365-40499296	EGFP	SATB2	NOTEST	0.0482089	0	#NAME?	0	1	1	no
ENSDARG00000078134	crygm2f	1.11893	0	0	0	0	0	ENSDARG00000078134	crygm2f	9:22344594-22366295	EGFP	SATB2	NOTEST	0.372977	0	#NAME?	0	1	1	no
ENSDARG00000078138	si:ch211-202h22.8	0.873313	0	0.510551	0	0	0	ENSDARG00000078138	si:ch211-202h22.8	1:54638125-54648766	EGFP	SATB2	NOTEST	0.461288	0	#NAME?	0	1	1	no
ENSDARG00000078177	cxcr3.1	0.14592	0	0	0	0	0	ENSDARG00000078177	cxcr3.1	16:11623955-11642009	EGFP	SATB2	NOTEST	0.0486401	0	#NAME?	0	1	1	no
ENSDARG00000078187	slc12a5b	0.437224	0	0.0344005	0	0	0	ENSDARG00000078187	slc12a5b	8:37280531-37391372	EGFP	SATB2	NOTEST	0.157208	0	#NAME?	0	1	1	no
ENSDARG00000078271	si:ch211-57m13.8	0.0414013	0.0380524	0	0	0	0	ENSDARG00000078271	si:ch211-57m13.8	10:6697368-6702812	EGFP	SATB2	NOTEST	0.0264846	0	#NAME?	0	1	1	no
ENSDARG00000078289	CABZ01046425.1	0.263283	0	0	0	0	0	ENSDARG00000078289	CABZ01046425.1	22:8827346-8829082	EGFP	SATB2	NOTEST	0.087761	0	#NAME?	0	1	1	no
ENSDARG00000078318	tmod1	0.327149	0	0	0	0	0	ENSDARG00000078318	tmod1	1:12231477-12257979	EGFP	SATB2	NOTEST	0.10905	0	#NAME?	0	1	1	no
ENSDARG00000078415	lrrc3	0.135826	0	0	0	0	0	ENSDARG00000078415	lrrc3	9:42157577-42164744	EGFP	SATB2	NOTEST	0.0452753	0	#NAME?	0	1	1	no
ENSDARG00000078518	kazald2	0.107617	0	0	0	0	0	ENSDARG00000078518	kazald2	14:5804927-5820524	EGFP	SATB2	NOTEST	0.0358725	0	#NAME?	0	1	1	no
ENSDARG00000078618	inpp5kb	0.143838	0	0.0957081	0	0	0	ENSDARG00000078618	inpp5kb	10:24302432-24391716	EGFP	SATB2	NOTEST	0.0798485	0	#NAME?	0	1	1	no
ENSDARG00000078821	si:ch211-225k7.5	0.755771	0	0	0	0	0	ENSDARG00000078821	si:ch211-225k7.5	7:4624925-4923974	EGFP	SATB2	NOTEST	0.251924	0	#NAME?	0	1	1	no
ENSDARG00000078875	adm2b	1.18154	0	0	0	0	0	ENSDARG00000078875	adm2b	18:6753676-6766354	EGFP	SATB2	NOTEST	0.393848	0	#NAME?	0	1	1	no
ENSDARG00000078918	comtd1	0.180177	0	0	0	0	0	ENSDARG00000078918	comtd1	13:17672526-17685345	EGFP	SATB2	NOTEST	0.060059	0	#NAME?	0	1	1	no
ENSDARG00000078927	BX323994.1	0.103553	0	0	0	0	0	ENSDARG00000078927	BX323994.1	5:53479575-53484789	EGFP	SATB2	NOTEST	0.0345176	0	#NAME?	0	1	1	no
ENSDARG00000079155	si:ch211-67f13.8	0.950345	0	0	0	0	0	ENSDARG00000079155	si:ch211-67f13.8	13:35984620-35985772	EGFP	SATB2	NOTEST	0.316782	0	#NAME?	0	1	1	no
ENSDARG00000079414	sez6b	0.426054	0.0457848	0	0	0	0	ENSDARG00000079414	sez6b	15:24212846-24544680	EGFP	SATB2	NOTEST	0.15728	0	#NAME?	0	1	1	no
ENSDARG00000079443	vipb	0.268793	0	0.134817	0	0	0	ENSDARG00000079443	vipb	11:43401200-43414172	EGFP	SATB2	NOTEST	0.134537	0	#NAME?	0	1	1	no
ENSDARG00000079452	rbm46	0.200945	0	0	0	0	0	ENSDARG00000079452	rbm46	1:10127162-10137776	EGFP	SATB2	NOTEST	0.0669817	0	#NAME?	0	1	1	no
ENSDARG00000079522	si:ch211-184m13.4	0.218025	0.149757	0.168472	0	0	0	ENSDARG00000079522	si:ch211-184m13.4	9:31075895-31259145	EGFP	SATB2	NOTEST	0.178751	0	#NAME?	0	1	1	no
ENSDARG00000079570	rspo2	0.361234	0.0553277	0	0	0	0	ENSDARG00000079570	rspo2	16:38453875-38553721	EGFP	SATB2	NOTEST	0.138854	0	#NAME?	0	1	1	no
ENSDARG00000079897	si:dkey-7k24.5	0.443281	0	0	0	0	0	ENSDARG00000079897	si:dkey-7k24.5	6:46481023-46494084	EGFP	SATB2	NOTEST	0.14776	0	#NAME?	0	1	1	no
ENSDARG00000082734	RF00004	0	8.07571	0	0	0	0	ENSDARG00000082734	RF00004	2:14670996-14671173	EGFP	SATB2	NOTEST	2.6919	0	#NAME?	0	1	1	no
ENSDARG00000086025	si:dkey-238d18.7	0	0.735972	0.197501	0	0	0	ENSDARG00000086025	si:dkey-238d18.7	15:37992274-37993810	EGFP	SATB2	NOTEST	0.311158	0	#NAME?	0	1	1	no
ENSDARG00000086055	si:dkey-7e14.3	0.939676	0	0	0	0	0	ENSDARG00000086055	si:dkey-7e14.3	12:18358081-18362422	EGFP	SATB2	NOTEST	0.313225	0	#NAME?	0	1	1	no
ENSDARG00000086265	bsnd	0.362584	0	0	0	0	0	ENSDARG00000086265	bsnd	20:7243878-7251770	EGFP	SATB2	NOTEST	0.120861	0	#NAME?	0	1	1	no
ENSDARG00000086383	or111-8	0.951099	0.364199	0	0	0	0	ENSDARG00000086383	or111-8	15:31404805-31406093	EGFP	SATB2	NOTEST	0.438433	0	#NAME?	0	1	1	no
ENSDARG00000086393	dbx1a	0.110351	0	0	0	0	0	ENSDARG00000086393	dbx1a	7:17023288-17041322	EGFP	SATB2	NOTEST	0.0367837	0	#NAME?	0	1	1	no
ENSDARG00000086412	taar12c	0.391173	0	0	0	0	0	ENSDARG00000086412	taar12c	20:46104101-46105119	EGFP	SATB2	NOTEST	0.130391	0	#NAME?	0	1	1	no
ENSDARG00000086460	si:dkey-83f18.10	0.130943	0	0	0	0	0	ENSDARG00000086460	si:dkey-83f18.10	7:4523050-4586777	EGFP	SATB2	NOTEST	0.0436476	0	#NAME?	0	1	1	no
ENSDARG00000086692	taar14a	0	0	0.351832	0	0	0	ENSDARG00000086692	taar14a	20:46164337-46249185	EGFP	SATB2	NOTEST	0.117277	0	#NAME?	0	1	1	no
ENSDARG00000086756	RGS9BP	0.17647	0	0	0	0	0	ENSDARG00000086756	RGS9BP	18:5781193-5781922	EGFP	SATB2	NOTEST	0.0588232	0	#NAME?	0	1	1	no
ENSDARG00000086859	qdprb2	0.297019	0	0	0	0	0	ENSDARG00000086859	qdprb2	1:24376393-24462691	EGFP	SATB2	NOTEST	0.0990062	0	#NAME?	0	1	1	no
ENSDARG00000086956	si:dkey-241l7.3	0	0.896086	0	0	0	0	ENSDARG00000086956	si:dkey-241l7.3	20:54013211-54035844	EGFP	SATB2	NOTEST	0.298695	0	#NAME?	0	1	1	no
ENSDARG00000087094	foxa	0.701124	0.0657913	0	0	0	0	ENSDARG00000087094	foxa	14:33973145-33981544	EGFP	SATB2	NOTEST	0.255638	0	#NAME?	0	1	1	no
ENSDARG00000087107	si:ch73-222h13.1	0.0493433	0	0	0	0	0	ENSDARG00000087107	si:ch73-222h13.1	1:10783669-10806625	EGFP	SATB2	NOTEST	0.0164478	0	#NAME?	0	1	1	no
ENSDARG00000087227	oit3	0.366771	0	0	0	0	0	ENSDARG00000087227	oit3	13:4685308-4707018	EGFP	SATB2	NOTEST	0.122257	0	#NAME?	0	1	1	no
ENSDARG00000087241	ucn3l	0.460117	0	0	0	0	0	ENSDARG00000087241	ucn3l	4:15981095-15981539	EGFP	SATB2	NOTEST	0.153372	0	#NAME?	0	1	1	no
ENSDARG00000087285	tmem182b	1.20669	0	0	0	0	0	ENSDARG00000087285	tmem182b	6:14301213-14312611	EGFP	SATB2	NOTEST	0.402231	0	#NAME?	0	1	1	no
ENSDARG00000087381	tcf23	0.264712	0	0	0	0	0	ENSDARG00000087381	tcf23	6:9651702-9657694	EGFP	SATB2	NOTEST	0.0882373	0	#NAME?	0	1	1	no
ENSDARG00000087390	hbbe1.3	0.528034	0	0	0	0	0	ENSDARG00000087390	hbbe1.3	3:55131288-55132052	EGFP	SATB2	NOTEST	0.176011	0	#NAME?	0	1	1	no
ENSDARG00000087419	taar12g	0.190294	0	0	0	0	0	ENSDARG00000087419	taar12g	20:46068597-46069609	EGFP	SATB2	NOTEST	0.0634313	0	#NAME?	0	1	1	no
ENSDARG00000087440	ponzr4	0.405658	0	0	0	0	0	ENSDARG00000087440	ponzr4	7:22678345-22699716	EGFP	SATB2	NOTEST	0.135219	0	#NAME?	0	1	1	no
ENSDARG00000087496	tradv30.0.6	1.16482	0	0	0	0	0	ENSDARG00000087496	tradv30.0.6	2:36597321-36597793	EGFP	SATB2	NOTEST	0.388273	0	#NAME?	0	1	1	no
ENSDARG00000087584	si:dkeyp-98a7.9	0.392614	0.0886623	0	0	0	0	ENSDARG00000087584	si:dkeyp-98a7.9	22:25733816-25744301	EGFP	SATB2	NOTEST	0.160425	0	#NAME?	0	1	1	no
ENSDARG00000087663	si:ch211-248l17.3	0	0	0.0401366	0	0	0	ENSDARG00000087663	si:ch211-248l17.3	24:37999089-38012593	EGFP	SATB2	NOTEST	0.0133789	0	#NAME?	0	1	1	no
ENSDARG00000087679	BX005012.1	0	0	0.42264	0	0	0	ENSDARG00000087679	BX005012.1	16:41524789-41529013	EGFP	SATB2	NOTEST	0.14088	0	#NAME?	0	1	1	no
ENSDARG00000087741	asb14b	0.508144	0.0780766	0	0	0	0	ENSDARG00000087741	asb14b	23:19490382-19503530	EGFP	SATB2	NOTEST	0.195407	0	#NAME?	0	1	1	no
ENSDARG00000088051	AL935044.1	0.171656	0.114356	0.701529	0	0	0	ENSDARG00000088051	AL935044.1	3:11371785-11373435	EGFP	SATB2	NOTEST	0.32918	0	#NAME?	0	1	1	no
ENSDARG00000088079	tmed6	0.149719	0	0	0	0	0	ENSDARG00000088079	tmed6	25:37285736-37288184	EGFP	SATB2	NOTEST	0.0499065	0	#NAME?	0	1	1	no
ENSDARG00000088100	KCNIP4	0.152279	0	0	0	0	0	ENSDARG00000088100	KCNIP4	7:69959140-69983948	EGFP	SATB2	NOTEST	0.0507597	0	#NAME?	0	1	1	no
ENSDARG00000088192	v2rh13	0.288958	0	0	0	0	0	ENSDARG00000088192	v2rh13	18:33353270-33357241	EGFP	SATB2	NOTEST	0.0963193	0	#NAME?	0	1	1	no
ENSDARG00000088252	si:dkey-83f18.7	0.390511	0	0.132062	0	0	0	ENSDARG00000088252	si:dkey-83f18.7	7:4523050-4586777	EGFP	SATB2	NOTEST	0.174191	0	#NAME?	0	1	1	no
ENSDARG00000088263	zgc:174356	0.218529	0	0.105509	0	0	0	ENSDARG00000088263	zgc:174356	17:39242436-39316202	EGFP	SATB2	NOTEST	0.108013	0	#NAME?	0	1	1	no
ENSDARG00000088330	AL935210.1	0.307124	0	0	0	0	0	ENSDARG00000088330	AL935210.1	3:55127548-55128258	EGFP	SATB2	NOTEST	0.102375	0	#NAME?	0	1	1	no
ENSDARG00000088462	taar12j	0.395659	0	0.230097	0	0	0	ENSDARG00000088462	taar12j	20:46045734-46046758	EGFP	SATB2	NOTEST	0.208585	0	#NAME?	0	1	1	no
ENSDARG00000088502	pimr137	0.411446	0	0.614169	0	0	0	ENSDARG00000088502	pimr137	10:36720165-36726188	EGFP	SATB2	NOTEST	0.341872	0	#NAME?	0	1	1	no
ENSDARG00000088556	si:dkey-1c7.2	0.844248	0	0	0	0	0	ENSDARG00000088556	si:dkey-1c7.2	1:57774453-57779848	EGFP	SATB2	NOTEST	0.281416	0	#NAME?	0	1	1	no
ENSDARG00000088682	si:dkey-192d15.3	1.04929	0	0	0	0	0	ENSDARG00000088682	si:dkey-192d15.3	7:3622557-3723144	EGFP	SATB2	NOTEST	0.349764	0	#NAME?	0	1	1	no
ENSDARG00000088717	ecrg4b	0.389351	0	0	0	0	0	ENSDARG00000088717	ecrg4b	6:15268684-15300140	EGFP	SATB2	NOTEST	0.129784	0	#NAME?	0	1	1	no
ENSDARG00000088794	si:ch73-180n10.1	0.912156	0	0.250404	0	0	0	ENSDARG00000088794	si:ch73-180n10.1	12:28543063-28548789	EGFP	SATB2	NOTEST	0.38752	0	#NAME?	0	1	1	no
ENSDARG00000088911	cbln17	0.25409	0.122533	0	0	0	0	ENSDARG00000088911	cbln17	10:21861450-21909696	EGFP	SATB2	NOTEST	0.125541	0	#NAME?	0	1	1	no
ENSDARG00000089000	taar1b	0.903513	0	0	0	0	0	ENSDARG00000089000	taar1b	20:46127590-46128590	EGFP	SATB2	NOTEST	0.301171	0	#NAME?	0	1	1	no
ENSDARG00000089026	si:dkey-183k8.2	0.328033	0	0	0	0	0	ENSDARG00000089026	si:dkey-183k8.2	6:49255705-49260454	EGFP	SATB2	NOTEST	0.109344	0	#NAME?	0	1	1	no
ENSDARG00000089183	ppp1r32	0.125009	0.11025	0	0	0	0	ENSDARG00000089183	ppp1r32	25:4180300-4192637	EGFP	SATB2	NOTEST	0.0784197	0	#NAME?	0	1	1	no
ENSDARG00000089193	CR384099.1	0.901995	0	0	0	0	0	ENSDARG00000089193	CR384099.1	24:32870700-33020894	EGFP	SATB2	NOTEST	0.300665	0	#NAME?	0	1	1	no
ENSDARG00000089320	ccdc175	0.128526	0.168772	0.199317	0	0	0	ENSDARG00000089320	ccdc175	17:14425218-14442570	EGFP	SATB2	NOTEST	0.165538	0	#NAME?	0	1	1	no
ENSDARG00000089567	si:ch211-103b1.2	0.0435095	0	0	0	0	0	ENSDARG00000089567	si:ch211-103b1.2	12:13091841-13106963	EGFP	SATB2	NOTEST	0.0145032	0	#NAME?	0	1	1	no
ENSDARG00000089593	pcdh2ab11	0.584162	0.205067	0	0	0	0	ENSDARG00000089593	pcdh2ab11	14:2118774-2327853	EGFP	SATB2	NOTEST	0.263077	0	#NAME?	0	1	1	no
ENSDARG00000089689	tex26	0.107562	0	0	0	0	0	ENSDARG00000089689	tex26	15:31513064-31523117	EGFP	SATB2	NOTEST	0.035854	0	#NAME?	0	1	1	no
ENSDARG00000089750	si:dkey-26g8.5	0	0	0.1166	0	0	0	ENSDARG00000089750	si:dkey-26g8.5	12:16919410-16923162	EGFP	SATB2	NOTEST	0.0388668	0	#NAME?	0	1	1	no
ENSDARG00000089952	si:ch211-147k9.8	0	0	0.340263	0	0	0	ENSDARG00000089952	si:ch211-147k9.8	25:21895181-21908644	EGFP	SATB2	NOTEST	0.113421	0	#NAME?	0	1	1	no
ENSDARG00000089954	si:ch211-189e2.3	0.0534651	0	0.119918	0	0	0	ENSDARG00000089954	si:ch211-189e2.3	17:6603690-6666849	EGFP	SATB2	NOTEST	0.0577944	0	#NAME?	0	1	1	no
ENSDARG00000089958	si:dkey-88n24.9	0.129239	0	0.101089	0	0	0	ENSDARG00000089958	si:dkey-88n24.9	7:3783874-3850107	EGFP	SATB2	NOTEST	0.076776	0	#NAME?	0	1	1	no
ENSDARG00000089966	si:zfos-1505d6.3	0.122083	0	0	0	0	0	ENSDARG00000089966	si:zfos-1505d6.3	20:54299418-54301276	EGFP	SATB2	NOTEST	0.0406945	0	#NAME?	0	1	1	no
ENSDARG00000090041	F2R (1 of many)	0.145607	0.121896	0	0	0	0	ENSDARG00000090041	F2R (1 of many)	21:8006535-8026267	EGFP	SATB2	NOTEST	0.089168	0	#NAME?	0	1	1	no
ENSDARG00000090064	TMEM179 (1 of many)	0.43502	0	0	0	0	0	ENSDARG00000090064	TMEM179 (1 of many)	17:46451370-46457622	EGFP	SATB2	NOTEST	0.145007	0	#NAME?	0	1	1	no
ENSDARG00000090126	si:ch211-105f12.2	0.516357	0	0	0	0	0	ENSDARG00000090126	si:ch211-105f12.2	15:15375606-15381879	EGFP	SATB2	NOTEST	0.172119	0	#NAME?	0	1	1	no
ENSDARG00000090179	si:ch211-117c9.1	0.383231	0.126071	0	0	0	0	ENSDARG00000090179	si:ch211-117c9.1	23:6926182-6943491	EGFP	SATB2	NOTEST	0.169767	0	#NAME?	0	1	1	no
ENSDARG00000090319	rnf212	0.103843	0	0	0	0	0	ENSDARG00000090319	rnf212	14:17397533-17416730	EGFP	SATB2	NOTEST	0.0346142	0	#NAME?	0	1	1	no
ENSDARG00000090372	taar14e	0.424053	0	0	0	0	0	ENSDARG00000090372	taar14e	20:46268905-46270063	EGFP	SATB2	NOTEST	0.141351	0	#NAME?	0	1	1	no
ENSDARG00000090428	ctrb1	0.799633	0	0	0	0	0	ENSDARG00000090428	ctrb1	7:35075846-35079299	EGFP	SATB2	NOTEST	0.266544	0	#NAME?	0	1	1	no
ENSDARG00000090429	si:dkeyp-7a3.1	0.0493491	0	0	0	0	0	ENSDARG00000090429	si:dkeyp-7a3.1	24:35787628-35814379	EGFP	SATB2	NOTEST	0.0164497	0	#NAME?	0	1	1	no
ENSDARG00000090464	taar14h	0.534724	0	0.316351	0	0	0	ENSDARG00000090464	taar14h	20:46250943-46252080	EGFP	SATB2	NOTEST	0.283692	0	#NAME?	0	1	1	no
ENSDARG00000090592	taar10b	0.208415	0	0	0	0	0	ENSDARG00000090592	taar10b	20:46137099-46138110	EGFP	SATB2	NOTEST	0.0694718	0	#NAME?	0	1	1	no
ENSDARG00000090670	si:dkey-201i6.8	0.491959	0.101858	0	0	0	0	ENSDARG00000090670	si:dkey-201i6.8	16:41032960-41059919	EGFP	SATB2	NOTEST	0.197939	0	#NAME?	0	1	1	no
ENSDARG00000090722	leg1.1	0.276437	0	0.0852239	0	0	0	ENSDARG00000090722	leg1.1	20:1412192-1421005	EGFP	SATB2	NOTEST	0.120554	0	#NAME?	0	1	1	no
ENSDARG00000090727	celf5b	0.117631	0	0	0	0	0	ENSDARG00000090727	celf5b	2:53357952-53426522	EGFP	SATB2	NOTEST	0.0392102	0	#NAME?	0	1	1	no
ENSDARG00000090899	sycn.3	0.684065	0	0	0	0	0	ENSDARG00000090899	sycn.3	21:25216396-25219305	EGFP	SATB2	NOTEST	0.228022	0	#NAME?	0	1	1	no
ENSDARG00000091029	phox2bb	0.203956	0.103467	0	0	0	0	ENSDARG00000091029	phox2bb	14:17064125-17072736	EGFP	SATB2	NOTEST	0.102474	0	#NAME?	0	1	1	no
ENSDARG00000091135	si:ch211-253p18.5	0.596139	0	0.158227	0	0	0	ENSDARG00000091135	si:ch211-253p18.5	20:20713384-20722619	EGFP	SATB2	NOTEST	0.251455	0	#NAME?	0	1	1	no
ENSDARG00000091143	or106-10	0.171757	0	0	0	0	0	ENSDARG00000091143	or106-10	10:36201193-36406562	EGFP	SATB2	NOTEST	0.0572524	0	#NAME?	0	1	1	no
ENSDARG00000091266	si:ch211-71m22.5	0.311516	0	0	0	0	0	ENSDARG00000091266	si:ch211-71m22.5	2:8617815-8636175	EGFP	SATB2	NOTEST	0.103839	0	#NAME?	0	1	1	no
ENSDARG00000091409	zp2.6	0.112899	0	0	0	0	0	ENSDARG00000091409	zp2.6	20:54304799-54306651	EGFP	SATB2	NOTEST	0.0376329	0	#NAME?	0	1	1	no
ENSDARG00000091519	BX511084.1	0.434441	0	0	0	0	0	ENSDARG00000091519	BX511084.1	13:9450825-9464509	EGFP	SATB2	NOTEST	0.144814	0	#NAME?	0	1	1	no
ENSDARG00000091609	spink4	1.22595	0	0	0	0	0	ENSDARG00000091609	spink4	1:12135128-12138612	EGFP	SATB2	NOTEST	0.408651	0	#NAME?	0	1	1	no
ENSDARG00000091616	prok2	0.218707	0	0	0	0	0	ENSDARG00000091616	prok2	6:43918528-43922813	EGFP	SATB2	NOTEST	0.0729024	0	#NAME?	0	1	1	no
ENSDARG00000091638	CABZ01072989.1	0.40555	0.184237	0	0	0	0	ENSDARG00000091638	CABZ01072989.1	22:387072-392224	EGFP	SATB2	NOTEST	0.196596	0	#NAME?	0	1	1	no
ENSDARG00000091790	si:ch211-203b20.4	0.314948	0	0	0	0	0	ENSDARG00000091790	si:ch211-203b20.4	18:33914167-33918356	EGFP	SATB2	NOTEST	0.104983	0	#NAME?	0	1	1	no
ENSDARG00000091832	MDFIC2	0.469366	0	0.156262	0	0	0	ENSDARG00000091832	MDFIC2	6:43491634-43498996	EGFP	SATB2	NOTEST	0.208543	0	#NAME?	0	1	1	no
ENSDARG00000091845	pimr21	0.645078	0	0	0	0	0	ENSDARG00000091845	pimr21	6:16870003-16871403	EGFP	SATB2	NOTEST	0.215026	0	#NAME?	0	1	1	no
ENSDARG00000091861	BX942825.1	5.63702	0	0	0	0	0	ENSDARG00000091861	BX942825.1	9:26199623-26504452	EGFP	SATB2	NOTEST	1.87901	0	#NAME?	0	1	1	no
ENSDARG00000091934	BX005429.1	0.683933	0	0	0	0	0	ENSDARG00000091934	BX005429.1	16:13955585-13965518	EGFP	SATB2	NOTEST	0.227978	0	#NAME?	0	1	1	no
ENSDARG00000091936	si:ch211-135f11.5	0.236177	0	0	0	0	0	ENSDARG00000091936	si:ch211-135f11.5	5:23839769-23843636	EGFP	SATB2	NOTEST	0.0787258	0	#NAME?	0	1	1	no
ENSDARG00000091941	CR847971.1	0	0	0.185	0	0	0	ENSDARG00000091941	CR847971.1	18:24477525-24483285	EGFP	SATB2	NOTEST	0.0616667	0	#NAME?	0	1	1	no
ENSDARG00000091974	CR356233.1	0	0.273072	0	0	0	0	ENSDARG00000091974	CR356233.1	4:6339571-6623645	EGFP	SATB2	NOTEST	0.0910241	0	#NAME?	0	1	1	no
ENSDARG00000091977	BX470189.2	0	0.476535	0	0	0	0	ENSDARG00000091977	BX470189.2	5:47977616-48023366	EGFP	SATB2	NOTEST	0.158845	0	#NAME?	0	1	1	no
ENSDARG00000091990	v2ra16	0.254745	0	0	0	0	0	ENSDARG00000091990	v2ra16	18:33310810-33314836	EGFP	SATB2	NOTEST	0.0849149	0	#NAME?	0	1	1	no
ENSDARG00000092001	CR735121.1	0.705036	0	0	0	0	0	ENSDARG00000092001	CR735121.1	9:41445790-41446719	EGFP	SATB2	NOTEST	0.235012	0	#NAME?	0	1	1	no
ENSDARG00000092026	zgc:173545	0.427324	0	0	0	0	0	ENSDARG00000092026	zgc:173545	11:18157259-18158883	EGFP	SATB2	NOTEST	0.142441	0	#NAME?	0	1	1	no
ENSDARG00000092104	BX571955.1	0.306511	0	0	0	0	0	ENSDARG00000092104	BX571955.1	10:8675889-8677828	EGFP	SATB2	NOTEST	0.10217	0	#NAME?	0	1	1	no
ENSDARG00000092109	BX511093.1	0.520389	0	0	0	0	0	ENSDARG00000092109	BX511093.1	1:17330494-17361155	EGFP	SATB2	NOTEST	0.173463	0	#NAME?	0	1	1	no
ENSDARG00000092137	si:dkey-4i23.5	0	0.332363	0	0	0	0	ENSDARG00000092137	si:dkey-4i23.5	2:35612620-35614293	EGFP	SATB2	NOTEST	0.110788	0	#NAME?	0	1	1	no
ENSDARG00000092174	si:ch211-59d15.4	0	0.228615	0.194544	0	0	0	ENSDARG00000092174	si:ch211-59d15.4	20:9211236-9216772	EGFP	SATB2	NOTEST	0.141053	0	#NAME?	0	1	1	no
ENSDARG00000092178	BX908388.1	0	1.02227	0	0	0	0	ENSDARG00000092178	BX908388.1	18:44153673-44154271	EGFP	SATB2	NOTEST	0.340756	0	#NAME?	0	1	1	no
ENSDARG00000092200	si:dkey-26i13.6	0.237895	0	0	0	0	0	ENSDARG00000092200	si:dkey-26i13.6	1:11606009-11607062	EGFP	SATB2	NOTEST	0.0792983	0	#NAME?	0	1	1	no
ENSDARG00000092217	AL929092.1	0.285376	0	0	0	0	0	ENSDARG00000092217	AL929092.1	15:31479656-31480566	EGFP	SATB2	NOTEST	0.0951254	0	#NAME?	0	1	1	no
ENSDARG00000092255	si:dkey-102f14.7	1.30824	0	0.289419	0	0	0	ENSDARG00000092255	si:dkey-102f14.7	18:17474988-17476941	EGFP	SATB2	NOTEST	0.532554	0	#NAME?	0	1	1	no
ENSDARG00000092317	pimr152	0.0796236	0	0	0	0	0	ENSDARG00000092317	pimr152	13:9492953-9496141	EGFP	SATB2	NOTEST	0.0265412	0	#NAME?	0	1	1	no
ENSDARG00000092379	si:dkeyp-51b9.3	0.199504	0	0	0	0	0	ENSDARG00000092379	si:dkeyp-51b9.3	8:2478861-2481965	EGFP	SATB2	NOTEST	0.0665012	0	#NAME?	0	1	1	no
ENSDARG00000092406	or115-8	0.180098	0	0	0	0	0	ENSDARG00000092406	or115-8	21:40254428-40256146	EGFP	SATB2	NOTEST	0.0600327	0	#NAME?	0	1	1	no
ENSDARG00000092408	CU467861.2	0	0.442575	0.381166	0	0	0	ENSDARG00000092408	CU467861.2	8:16565836-16566479	EGFP	SATB2	NOTEST	0.27458	0	#NAME?	0	1	1	no
ENSDARG00000092437	BX649502.3	0	0.761788	0	0	0	0	ENSDARG00000092437	BX649502.3	3:33963246-34095221	EGFP	SATB2	NOTEST	0.253929	0	#NAME?	0	1	1	no
ENSDARG00000092459	si:dkey-9i23.5	0.216754	0	0	0	0	0	ENSDARG00000092459	si:dkey-9i23.5	1:44780848-44783558	EGFP	SATB2	NOTEST	0.0722515	0	#NAME?	0	1	1	no
ENSDARG00000092460	si:dkey-229d2.7	0.748795	0	0	0	0	0	ENSDARG00000092460	si:dkey-229d2.7	5:25585868-25589551	EGFP	SATB2	NOTEST	0.249598	0	#NAME?	0	1	1	no
ENSDARG00000092487	si:ch211-215m21.22	0.24706	0	0	0	0	0	ENSDARG00000092487	si:ch211-215m21.22	5:9112290-9114040	EGFP	SATB2	NOTEST	0.0823532	0	#NAME?	0	1	1	no
ENSDARG00000092518	si:dkey-21e2.11	0.209689	0	1.23243	0	0	0	ENSDARG00000092518	si:dkey-21e2.11	22:19188808-19428807	EGFP	SATB2	NOTEST	0.480706	0	#NAME?	0	1	1	no
ENSDARG00000092523	si:dkey-47k20.1	0.339839	0	0	0	0	0	ENSDARG00000092523	si:dkey-47k20.1	18:33550666-33553897	EGFP	SATB2	NOTEST	0.11328	0	#NAME?	0	1	1	no
ENSDARG00000092525	si:dkey-88l16.4	0.42969	0.347623	0	0	0	0	ENSDARG00000092525	si:dkey-88l16.4	10:14947002-14949367	EGFP	SATB2	NOTEST	0.259104	0	#NAME?	0	1	1	no
ENSDARG00000092538	BX927394.1	0.558842	0	0	0	0	0	ENSDARG00000092538	BX927394.1	21:19632250-19685679	EGFP	SATB2	NOTEST	0.186281	0	#NAME?	0	1	1	no
ENSDARG00000092539	CR855328.1	0.363816	0	0.376366	0	0	0	ENSDARG00000092539	CR855328.1	2:29795832-29899878	EGFP	SATB2	NOTEST	0.246727	0	#NAME?	0	1	1	no
ENSDARG00000092540	BX649502.4	0.280235	0	0	0	0	0	ENSDARG00000092540	BX649502.4	3:33963246-34095221	EGFP	SATB2	NOTEST	0.0934115	0	#NAME?	0	1	1	no
ENSDARG00000092552	fndc7rs2	0.691124	0	0	0	0	0	ENSDARG00000092552	fndc7rs2	2:45593782-45598651	EGFP	SATB2	NOTEST	0.230375	0	#NAME?	0	1	1	no
ENSDARG00000092567	si:dkey-61l1.4	0.0784589	0	0	0	0	0	ENSDARG00000092567	si:dkey-61l1.4	5:29199291-29238889	EGFP	SATB2	NOTEST	0.026153	0	#NAME?	0	1	1	no
ENSDARG00000092574	si:ch211-198d23.1	0.830147	0.423257	0	0	0	0	ENSDARG00000092574	si:ch211-198d23.1	8:38593903-38616712	EGFP	SATB2	NOTEST	0.417801	0	#NAME?	0	1	1	no
ENSDARG00000092589	pimr150	0.0965204	0	0	0	0	0	ENSDARG00000092589	pimr150	10:34120542-34150672	EGFP	SATB2	NOTEST	0.0321735	0	#NAME?	0	1	1	no
ENSDARG00000092591	BX322660.1	1.30559	0	0	0	0	0	ENSDARG00000092591	BX322660.1	13:38190597-38195214	EGFP	SATB2	NOTEST	0.435198	0	#NAME?	0	1	1	no
ENSDARG00000092650	si:ch211-223p8.8	0	0.342208	0	0	0	0	ENSDARG00000092650	si:ch211-223p8.8	13:24829995-24830717	EGFP	SATB2	NOTEST	0.114069	0	#NAME?	0	1	1	no
ENSDARG00000092691	CU682811.1	0	0.202618	0	0	0	0	ENSDARG00000092691	CU682811.1	23:38096819-38099972	EGFP	SATB2	NOTEST	0.0675392	0	#NAME?	0	1	1	no
ENSDARG00000092695	CT025775.1	0.326265	0	0	0	0	0	ENSDARG00000092695	CT025775.1	13:9002574-9236954	EGFP	SATB2	NOTEST	0.108755	0	#NAME?	0	1	1	no
ENSDARG00000092723	si:ch73-381f5.2	0	0.0551444	0	0	0	0	ENSDARG00000092723	si:ch73-381f5.2	23:19135914-19140781	EGFP	SATB2	NOTEST	0.0183815	0	#NAME?	0	1	1	no
ENSDARG00000092750	CR396590.3	0.655252	0.43889	0	0	0	0	ENSDARG00000092750	CR396590.3	10:40609460-40609953	EGFP	SATB2	NOTEST	0.364714	0	#NAME?	0	1	1	no
ENSDARG00000092764	si:dkey-57a22.14	0.872537	0	0	0	0	0	ENSDARG00000092764	si:dkey-57a22.14	9:21996314-21997149	EGFP	SATB2	NOTEST	0.290846	0	#NAME?	0	1	1	no
ENSDARG00000092800	CU075735.2	0.470783	0	0	0	0	0	ENSDARG00000092800	CU075735.2	10:23933777-24298042	EGFP	SATB2	NOTEST	0.156928	0	#NAME?	0	1	1	no
ENSDARG00000092939	BX537338.1	0.200657	0	0	0	0	0	ENSDARG00000092939	BX537338.1	16:33515765-33541958	EGFP	SATB2	NOTEST	0.0668855	0	#NAME?	0	1	1	no
ENSDARG00000092943	BX001050.1	0.490745	0	0	0	0	0	ENSDARG00000092943	BX001050.1	10:40747872-40748898	EGFP	SATB2	NOTEST	0.163582	0	#NAME?	0	1	1	no
ENSDARG00000092951	BX548044.4	0.246149	0	0	0	0	0	ENSDARG00000092951	BX548044.4	10:34035688-34043319	EGFP	SATB2	NOTEST	0.0820497	0	#NAME?	0	1	1	no
ENSDARG00000093015	si:ch211-174j14.2	0.177011	0	0	0	0	0	ENSDARG00000093015	si:ch211-174j14.2	18:28937060-28938912	EGFP	SATB2	NOTEST	0.0590036	0	#NAME?	0	1	1	no
ENSDARG00000093079	proca	0.153441	0	0	0	0	0	ENSDARG00000093079	proca	2:5456540-5475921	EGFP	SATB2	NOTEST	0.051147	0	#NAME?	0	1	1	no
ENSDARG00000093083	CT573467.1	0.351351	0	0.46959	0	0	0	ENSDARG00000093083	CT573467.1	2:11685741-11833356	EGFP	SATB2	NOTEST	0.273647	0	#NAME?	0	1	1	no
ENSDARG00000093105	BX004774.1	0.756221	0	0	0	0	0	ENSDARG00000093105	BX004774.1	8:20825986-20858676	EGFP	SATB2	NOTEST	0.252074	0	#NAME?	0	1	1	no
ENSDARG00000093156	si:ch73-21g5.7	0.271312	0	0	0	0	0	ENSDARG00000093156	si:ch73-21g5.7	23:21473102-21474476	EGFP	SATB2	NOTEST	0.0904372	0	#NAME?	0	1	1	no
ENSDARG00000093164	si:rp71-23d18.8	0.319572	0	0	0	0	0	ENSDARG00000093164	si:rp71-23d18.8	22:24673167-24683002	EGFP	SATB2	NOTEST	0.106524	0	#NAME?	0	1	1	no
ENSDARG00000093234	si:dkey-65l23.2	0.164299	0	0	0	0	0	ENSDARG00000093234	si:dkey-65l23.2	21:18866975-18891041	EGFP	SATB2	NOTEST	0.0547662	0	#NAME?	0	1	1	no
ENSDARG00000093237	si:ch211-89o9.4	0.123505	0	0	0	0	0	ENSDARG00000093237	si:ch211-89o9.4	1:41454209-41464007	EGFP	SATB2	NOTEST	0.0411682	0	#NAME?	0	1	1	no
ENSDARG00000093266	taar19o	0.511766	0.289475	0	0	0	0	ENSDARG00000093266	taar19o	10:40756351-40757389	EGFP	SATB2	NOTEST	0.26708	0	#NAME?	0	1	1	no
ENSDARG00000093270	AL954694.2	0.443273	0	0	0	0	0	ENSDARG00000093270	AL954694.2	5:40557231-40714602	EGFP	SATB2	NOTEST	0.147758	0	#NAME?	0	1	1	no
ENSDARG00000093305	BX957257.1	0.33302	0	0	0	0	0	ENSDARG00000093305	BX957257.1	5:23768376-23770557	EGFP	SATB2	NOTEST	0.111007	0	#NAME?	0	1	1	no
ENSDARG00000093318	si:dkey-57a22.15	0.290574	0	0	0	0	0	ENSDARG00000093318	si:dkey-57a22.15	9:22003941-22004833	EGFP	SATB2	NOTEST	0.0968581	0	#NAME?	0	1	1	no
ENSDARG00000093320	BX323028.1	0.809118	0	0	0	0	0	ENSDARG00000093320	BX323028.1	23:10601323-10606546	EGFP	SATB2	NOTEST	0.269706	0	#NAME?	0	1	1	no
ENSDARG00000093347	si:ch211-239f4.6	0.654395	0	0	0	0	0	ENSDARG00000093347	si:ch211-239f4.6	1:45138904-45146834	EGFP	SATB2	NOTEST	0.218132	0	#NAME?	0	1	1	no
ENSDARG00000093353	si:ch211-263m18.4	0.589558	0.125861	0	0	0	0	ENSDARG00000093353	si:ch211-263m18.4	21:43644572-43666481	EGFP	SATB2	NOTEST	0.238473	0	#NAME?	0	1	1	no
ENSDARG00000093410	BX936421.1	0.179287	0	0	0	0	0	ENSDARG00000093410	BX936421.1	9:25567604-25837749	EGFP	SATB2	NOTEST	0.0597625	0	#NAME?	0	1	1	no
ENSDARG00000093431	BX119909.1	0.189776	0	0	0	0	0	ENSDARG00000093431	BX119909.1	6:9245086-9251122	EGFP	SATB2	NOTEST	0.0632588	0	#NAME?	0	1	1	no
ENSDARG00000093446	BX649502.6	1.01777	0	0	0	0	0	ENSDARG00000093446	BX649502.6	3:33963246-34095221	EGFP	SATB2	NOTEST	0.339258	0	#NAME?	0	1	1	no
ENSDARG00000093458	si:dkey-76d14.2	0.719269	0	0	0	0	0	ENSDARG00000093458	si:dkey-76d14.2	2:45068365-45070442	EGFP	SATB2	NOTEST	0.239756	0	#NAME?	0	1	1	no
ENSDARG00000093470	CT009596.1	0	0	0.764416	0	0	0	ENSDARG00000093470	CT009596.1	4:4166343-4167489	EGFP	SATB2	NOTEST	0.254805	0	#NAME?	0	1	1	no
ENSDARG00000093471	CR361551.1	1.118	0	0	0	0	0	ENSDARG00000093471	CR361551.1	9:19027431-19069164	EGFP	SATB2	NOTEST	0.372668	0	#NAME?	0	1	1	no
ENSDARG00000093485	BX571701.3	0	0.627257	0	0	0	0	ENSDARG00000093485	BX571701.3	13:2857460-2859411	EGFP	SATB2	NOTEST	0.209086	0	#NAME?	0	1	1	no
[truncated: 30,520 more rows]

## Sheet: Confirmed by qPCR
Confirmed by qPCR	Human ortholog	Significance	SATB2-bound (3kb-TSS-gene body+3k)	SATB2-associated (nearest gene prediction, 10kb-TSS+5KB-100kb distal)	Neural crest associated	invadopodia associated	Description
pdgfab	PDGFA	****	SATB2-bound	SATB2-associated		invadopodia associated	platelet-derived growth factor alpha polypeptide
itga6b	ITGA6	****	SATB2-bound	SATB2-associated			integrin, alpha 6
mao	MAOB	****	SATB2-bound	SATB2-associated			monoamine oxidase B
fgfr4	FGFR4	****	SATB2-bound	SATB2-associated			fibroblast growth factor receptor 4
klf6a	KLF6	***	SATB2-bound	SATB2-associated			Kruppel-like factor 6
rhobtb2a	RHOBTB2	***	SATB2-bound	SATB2-associated			Rho-related BTB domain containing 2
c6	C6	***	SATB2-bound	SATB2-associated			complement
figf	FIGF	***	SATB2-bound	SATB2-associated			c-fos induced growth factor (vascular endothelial growth factor D)
lifra	LIFR	**	SATB2-bound	SATB2-associated			leukemia inhibitory factor receptor alpha
klf13	KLF13	**	SATB2-bound	SATB2-associated			Kruppel-like factor 13
nrp2a	NRP2	**	SATB2-bound	SATB2-associated	neural crest associated		neuropilin 2
snai2	SNAI2	*	SATB2-bound	SATB2-associated	neural crest associated	invadopodia associated	SNAIL
igf2bp3	IGF2BP3	*	SATB2-bound	SATB2-associated		invadopodia associated	insulin-like growth factor 2 mRNA binding protein 3
sema3fa	SEMA3F	*	SATB2-bound	SATB2-associated	neural crest associated		sema domain, immunoglobulin domain (Ig), short basic domain, secreted, (semaphorin) 3F
hdac1	HDAC1	*	SATB2-bound	SATB2-associated			histone deacetylase 1
esrrga	ESRRG	*	SATB2-bound	SATB2-associated			estrogen-related receptor gamma
fbn2b	FBN2	****		SATB2-associated			fibrillin 2
csf1ra	CSF1R	****		SATB2-associated	neural crest associated		colony stimulating factor 1 receptor
emilin1a	EMILIN1	***		SATB2-associated			elastin microfibril interfacer 1
vim	VIM	**		SATB2-associated			vimentin
sox2	SOX2	**		SATB2-associated			sox2
dpysl5b	DPYSL5	**		SATB2-associated	neural crest associated		dihydropyrimidinase-like 5
chd7	CHD7	*		SATB2-associated	neural crest associated		chromodomain helicase DNA binding protein 7
sema3aa	SEMA3A	*		SATB2-associated			sema domain, immunoglobulin domain (Ig), short basic domain, secreted, (semaphorin) 3A
adam28	ADAM28	*		SATB2-associated			ADAM metallopeptidase domain 28
dusp6	DUSP6	*		SATB2-associated			dual specificity phosphatase 6
cited2	CITED2	****			neural crest associated		Cbp/p300-interacting transactivator, with Glu/Asp-rich carboxy-terminal domain, 2
fn1b	FN1	****					fibronectin 1
runx2a	RUNX2	**			neural crest associated		runt-related transcription factor 2
krt15	KRT15	**					keratin 15, type I
gsnb	GSN	**					gelsolin
arpc1a	ARPC1A	*					actin related protein 2/3 complex, subunit 1A, 41kDa
camk2n1a	CAMK2N2	*					calcium/calmodulin-dependent protein kinase II inhibitor 2

## Sheet: RNA Best human ortholog DIOPT
Zebrafish GeneID	Zebrafish Gene ID	ZFINID	Zebrafish Symbol	Species	Human GeneID	HGNCID	Human Symbol	DIOPT Score	Weighted Score	Rank	Best Score	Best Score Reverse	Prediction Derived From
ENSDARG00000000001	368418	ZDB-GENE-030616-55	slc35a5	Human	55032	20792	SLC35A5	15	15.3	high	Yes	Yes	Compara, eggNOG, Hieranoid, Homologene, Inparanoid, OMA, OrthoDB, OrthoFinder, OrthoInspector, orthoMCL, Panther, Phylome, RoundUp, TreeFam, ZFIN
ENSDARG00000000002	368419	ZDB-GENE-030616-56	ccdc80	Human	151887	30649	CCDC80	14	14.27	high	Yes	Yes	Compara, eggNOG, Hieranoid, Homologene, Inparanoid, OMA, OrthoDB, OrthoFinder, OrthoInspector, orthoMCL, Panther, Phylome, TreeFam, ZFIN
ENSDARG00000000018	64604	ZDB-GENE-001221-1	nrf1	Human	4899	7996	NRF1	15	15.3	high	Yes	Yes	Compara, eggNOG, Hieranoid, Homologene, Inparanoid, OMA, OrthoDB, OrthoFinder, OrthoInspector, orthoMCL, Panther, Phylome, RoundUp, TreeFam, ZFIN
ENSDARG00000000019	368425	ZDB-GENE-030616-67	ube2h	Human	7328	12484	UBE2H	15	15.3	high	Yes	Yes	Compara, eggNOG, Hieranoid, Homologene, Inparanoid, OMA, OrthoDB, OrthoFinder, OrthoInspector, orthoMCL, Panther, Phylome, RoundUp, TreeFam, ZFIN
ENSDARG00000000068	327272	ZDB-GENE-031006-7	slc9a3r1a	Human	9368	11075	SLC9A3R1	13	13.47	high	Yes	Yes	Hieranoid, Homologene, Inparanoid, OMA, OrthoDB, OrthoFinder, OrthoInspector, orthoMCL, Panther, Phylome, RoundUp, TreeFam, ZFIN
ENSDARG00000000069	58093	ZDB-GENE-000511-3	dap	Human	1611	2672	DAP	9	9.3	high	Yes	Yes	Compara, eggNOG, Hieranoid, Homologene, OrthoFinder, Panther, Phylome, TreeFam, ZFIN
ENSDARG00000000086	368504	ZDB-GENE-030616-226	itsn1	Human	6453	6183	ITSN1	15	15.3	high	Yes	Yes	Compara, eggNOG, Hieranoid, Homologene, Inparanoid, OMA, OrthoDB, OrthoFinder, OrthoInspector, orthoMCL, Panther, Phylome, RoundUp, TreeFam, ZFIN
ENSDARG00000000103	555454	ZDB-GENE-030616-162	myh10	Human	4628	7568	MYH10	14	14.3	high	Yes	Yes	Compara, eggNOG, Homologene, Inparanoid, OMA, OrthoDB, OrthoFinder, OrthoInspector, orthoMCL, Panther, Phylome, RoundUp, TreeFam, ZFIN
ENSDARG00000000142	368645	ZDB-GENE-030616-546	tmem267	Human	64417	26139	TMEM267	15	15.3	high	Yes	Yes	Compara, eggNOG, Hieranoid, Homologene, Inparanoid, OMA, OrthoDB, OrthoFinder, OrthoInspector, orthoMCL, Panther, Phylome, RoundUp, TreeFam, ZFIN
ENSDARG00000000151	30670	ZDB-GENE-990415-263	thraa	Human	7067	11796	THRA	9	9.41	high	Yes	Yes	Compara, Homologene, OrthoDB, OrthoFinder, OrthoInspector, Panther, Phylome, TreeFam, ZFIN
ENSDARG00000000161	566412	ZDB-GENE-041014-84	itsn2a	Human	50618	6184	ITSN2	13	13.25	high	Yes	Yes	Compara, eggNOG, Homologene, OMA, OrthoDB, OrthoFinder, OrthoInspector, orthoMCL, Panther, Phylome, RoundUp, TreeFam, ZFIN
ENSDARG00000000175	30338	ZDB-GENE-990415-103	hoxb2a	Human	3212	5113	HOXB2	14	14.29	high	Yes	Yes	Compara, eggNOG, Hieranoid, Homologene, Inparanoid, OMA, OrthoFinder, OrthoInspector, orthoMCL, Panther, Phylome, RoundUp, TreeFam, ZFIN
ENSDARG00000000183	407634	ZDB-GENE-030131-6259	ptpn4b	Human	5775	9656	PTPN4	10	10.24	moderate	Yes	No	Compara, eggNOG, OrthoDB, OrthoFinder, orthoMCL, Panther, Phylome, RoundUp, TreeFam, ZFIN
ENSDARG00000000189	556743	ZDB-GENE-040724-119	sema6e	Human	10500	10740	SEMA6C	10	9.75	high	Yes	Yes	Compara, eggNOG, OMA, OrthoDB, OrthoFinder, orthoMCL, Panther, Phylome, RoundUp, TreeFam
ENSDARG00000000212	436656	ZDB-GENE-040718-78	krt97	Human	3860	6415	KRT13	7	6.86	moderate	Yes	No	Compara, eggNOG, OMA, OrthoDB, OrthoInspector, Panther, Phylome
ENSDARG00000000212	436656	ZDB-GENE-040718-78	krt97	Human	3872	6427	KRT17	7	6.76	moderate	Yes	No	Compara, eggNOG, Homologene, OMA, OrthoDB, OrthoInspector, Phylome
ENSDARG00000000229	559473	ZDB-GENE-050208-484	usp49	Human	25862	20078	USP49	12	12.25	high	Yes	Yes	Compara, eggNOG, Homologene, OMA, OrthoDB, OrthoFinder, orthoMCL, Panther, Phylome, RoundUp, TreeFam, ZFIN
ENSDARG00000000241	58153	ZDB-GENE-000511-8	slc40a1	Human	30061	10909	SLC40A1	14	14.29	high	Yes	Yes	Compara, eggNOG, Hieranoid, Homologene, Inparanoid, OMA, OrthoFinder, OrthoInspector, orthoMCL, Panther, Phylome, RoundUp, TreeFam, ZFIN
ENSDARG00000000324	100007924	ZDB-GENE-070912-578	dcaf8	Human	50717	24891	DCAF8	14	14.29	high	Yes	Yes	Compara, eggNOG, Hieranoid, Homologene, Inparanoid, OrthoDB, OrthoFinder, OrthoInspector, orthoMCL, Panther, Phylome, RoundUp, TreeFam, ZFIN
ENSDARG00000000349	497149	ZDB-GENE-040724-203	si:rp71-1p14.7	Human	85016	28188	C11orf70	13	13.27	high	Yes	Yes	Compara, eggNOG, Hieranoid, Homologene, Inparanoid, OMA, OrthoDB, OrthoFinder, orthoMCL, Panther, Phylome, TreeFam, ZFIN
ENSDARG00000000369	678619	ZDB-GENE-060421-6938	prkag3b	Human	53632	9387	PRKAG3	12	12.22	high	Yes	Yes	Compara, eggNOG, Hieranoid, Homologene, OMA, OrthoDB, OrthoInspector, orthoMCL, Panther, Phylome, TreeFam, ZFIN
ENSDARG00000000370	368847	ZDB-GENE-030616-399	triob	Human	7204	12303	TRIO	7	7.29	moderate	Yes	No	Compara, eggNOG, OrthoFinder, orthoMCL, Panther, TreeFam, ZFIN
ENSDARG00000000380	368410	ZDB-GENE-030616-42	pde6a	Human	5145	8785	PDE6A	14	14.25	high	Yes	Yes	Compara, eggNOG, Hieranoid, Homologene, OMA, OrthoDB, OrthoFinder, OrthoInspector, orthoMCL, Panther, Phylome, RoundUp, TreeFam, ZFIN
ENSDARG00000000394	556290	ZDB-GENE-090505-1	matr3l1.2	Human	9782	6912	MATR3	10	9.66	high	Yes	Yes	Compara, eggNOG, Hieranoid, Inparanoid, OrthoDB, OrthoFinder, OrthoInspector, orthoMCL, Phylome, TreeFam
ENSDARG00000000423	368688	ZDB-GENE-030616-19	si:ch73-314g15.3					0	0	None
ENSDARG00000000442	368686	ZDB-GENE-030616-17	slc39a13	Human	91252	20859	SLC39A13	15	15.3	high	Yes	Yes	Compara, eggNOG, Hieranoid, Homologene, Inparanoid, OMA, OrthoDB, OrthoFinder, OrthoInspector, orthoMCL, Panther, Phylome, RoundUp, TreeFam, ZFIN
ENSDARG00000000460	60647	ZDB-GENE-001106-6	nitr2b	Human	284759	16247	SIRPB2	3	3.06	moderate	Yes	No	Hieranoid, Inparanoid, OrthoDB
ENSDARG00000000472	30726	ZDB-GENE-990630-12	cntn2	Human	6900	2172	CNTN2	10	10.11	high	Yes	Yes	Compara, eggNOG, Hieranoid, Homologene, OMA, OrthoFinder, orthoMCL, Phylome, TreeFam, ZFIN
ENSDARG00000000474	558408	ZDB-GENE-030616-266	tnni1a	Human	7135	11945	TNNI1	11	11.25	high	Yes	Yes	Compara, eggNOG, Hieranoid, Inparanoid, OrthoFinder, OrthoInspector, orthoMCL, Panther, Phylome, TreeFam, ZFIN
ENSDARG00000000476	368631	ZDB-GENE-030616-528	pms1	Human	5378	9121	PMS1	12	12.22	high	Yes	Yes	Compara, eggNOG, Hieranoid, Homologene, OMA, OrthoDB, OrthoFinder, orthoMCL, Panther, Phylome, TreeFam, ZFIN
ENSDARG00000000489	393929	ZDB-GENE-040426-1630	upf3b	Human	65109	20439	UPF3B	11	11.21	high	Yes	Yes	Compara, eggNOG, Hieranoid, Homologene, OMA, OrthoFinder, orthoMCL, Panther, Phylome, TreeFam, ZFIN
ENSDARG00000000503	58038	ZDB-GENE-000330-4	stx1b	Human	112755	18539	STX1B	15	15.3	high	Yes	Yes	Compara, eggNOG, Hieranoid, Homologene, Inparanoid, OMA, OrthoDB, OrthoFinder, OrthoInspector, orthoMCL, Panther, Phylome, RoundUp, TreeFam, ZFIN
ENSDARG00000000516	368636	ZDB-GENE-030616-533	ankar	Human	150709	26350	ANKAR	12	12.36	high	Yes	Yes	Compara, eggNOG, Homologene, Inparanoid, OMA, OrthoDB, OrthoFinder, OrthoInspector, orthoMCL, Panther, TreeFam, ZFIN
ENSDARG00000000529	327216	ZDB-GENE-030131-5427	ofd1	Human	8481	2567	OFD1	14	14.2	high	Yes	Yes	Compara, eggNOG, Hieranoid, Homologene, Inparanoid, OMA, OrthoDB, OrthoFinder, OrthoInspector, orthoMCL, Phylome, RoundUp, TreeFam, ZFIN
ENSDARG00000000540	368827	ZDB-GENE-030616-362	asnsd1	Human	54529	24910	ASNSD1	15	15.3	high	Yes	Yes	Compara, eggNOG, Hieranoid, Homologene, Inparanoid, OMA, OrthoDB, OrthoFinder, OrthoInspector, orthoMCL, Panther, Phylome, RoundUp, TreeFam, ZFIN
ENSDARG00000000542	567899	ZDB-GENE-041210-221	gtf2e1	Human	2960	4650	GTF2E1	15	15.3	high	Yes	Yes	Compara, eggNOG, Hieranoid, Homologene, Inparanoid, OMA, OrthoDB, OrthoFinder, OrthoInspector, orthoMCL, Panther, Phylome, RoundUp, TreeFam, ZFIN
ENSDARG00000000551	368885	ZDB-GENE-030616-566	slc1a4	Human	6509	10942	SLC1A4	15	15.3	high	Yes	Yes	Compara, eggNOG, Hieranoid, Homologene, Inparanoid, OMA, OrthoDB, OrthoFinder, OrthoInspector, orthoMCL, Panther, Phylome, RoundUp, TreeFam, ZFIN
ENSDARG00000000563	100001684	ZDB-GENE-030616-413	ttn.1	Human	7273	12403	TTN	6	6.33	high	Yes	Yes	Compara, eggNOG, OrthoFinder, orthoMCL, Panther, ZFIN
ENSDARG00000000567	100005963	ZDB-GENE-131126-34	znf281a	Human	23528	13075	ZNF281	10	10.36	moderate	Yes	No	Compara, Hieranoid, Homologene, Inparanoid, OMA, OrthoDB, OrthoInspector, orthoMCL, TreeFam, ZFIN
ENSDARG00000000568	325221	ZDB-GENE-030131-3946	ell	Human	8178	23114	ELL	11	11.21	high	Yes	Yes	Compara, eggNOG, Hieranoid, Homologene, OMA, OrthoFinder, orthoMCL, Panther, Phylome, TreeFam, ZFIN
ENSDARG00000000588	558950	ZDB-GENE-060312-30	grasp	Human	160622	18707	GRASP	13	13.49	high	Yes	Yes	Compara, Hieranoid, Homologene, Inparanoid, OMA, OrthoDB, OrthoFinder, OrthoInspector, orthoMCL, Panther, RoundUp, TreeFam, ZFIN
ENSDARG00000000606	100148193	ZDB-GENE-030616-623	dnah6	Human	1768	2951	DNAH6	13	12.75	high	Yes	Yes	Compara, eggNOG, Hieranoid, Homologene, OMA, OrthoDB, OrthoFinder, OrthoInspector, orthoMCL, Panther, Phylome, RoundUp, TreeFam
ENSDARG00000000631	368448	ZDB-GENE-030616-449	ptpn4a	Human	5775	9656	PTPN4	12	12.46	high	Yes	Yes	eggNOG, Homologene, Inparanoid, OMA, OrthoDB, OrthoFinder, OrthoInspector, orthoMCL, Panther, RoundUp, TreeFam, ZFIN
ENSDARG00000000631	407644	-	LOC407644	Human	5775	9656	PTPN4	3	2.84	moderate	Yes	No	Compara, OMA, orthoMCL
ENSDARG00000000638	30504	ZDB-GENE-990604-43	opn1mw4	Human	6010	10012	RHO	2	2.01	moderate	Yes	No	OrthoDB, OrthoFinder
ENSDARG00000000651	368635	ZDB-GENE-030616-532	osgepl1	Human	64172	23075	OSGEPL1	13	13.26	high	Yes	Yes	Compara, eggNOG, Hieranoid, Homologene, Inparanoid, OMA, OrthoFinder, OrthoInspector, orthoMCL, Panther, Phylome, TreeFam, ZFIN
ENSDARG00000000656	30665	ZDB-GENE-990415-140	psmb9a	Human	5698	9546	PSMB9	15	15.3	high	Yes	Yes	Compara, eggNOG, Hieranoid, Homologene, Inparanoid, OMA, OrthoDB, OrthoFinder, OrthoInspector, orthoMCL, Panther, Phylome, RoundUp, TreeFam, ZFIN
ENSDARG00000000666	492339	ZDB-GENE-041114-173	creg2	Human	200407	14272	CREG2	11	11.33	high	Yes	Yes	Compara, eggNOG, Homologene, OMA, OrthoFinder, OrthoInspector, orthoMCL, Panther, RoundUp, TreeFam, ZFIN
ENSDARG00000000690	799482	ZDB-GENE-050417-309	sypl2b	Human	6856	11507	SYPL1	7	6.95	moderate	Yes	No	eggNOG, Hieranoid, OMA, OrthoDB, OrthoFinder, OrthoInspector, RoundUp
ENSDARG00000000729	561006	ZDB-GENE-010110-3	daxx	Human	1616	2681	DAXX	11	11.4	high	Yes	Yes	Compara, eggNOG, Hieranoid, Inparanoid, OMA, OrthoDB, OrthoFinder, OrthoInspector, orthoMCL, Panther, ZFIN
ENSDARG00000000730	368923	ZDB-GENE-030616-629	slc6a22.1	Human	6539	11045	SLC6A12	4	3.87	moderate	Yes	No	OrthoDB, OrthoFinder, orthoMCL, TreeFam
ENSDARG00000000747	100005300	ZDB-GENE-110714-2	lcmt2	Human	9836	17558	LCMT2	15	15.3	high	Yes	Yes	Compara, eggNOG, Hieranoid, Homologene, Inparanoid, OMA, OrthoDB, OrthoFinder, OrthoInspector, orthoMCL, Panther, Phylome, RoundUp, TreeFam, ZFIN
ENSDARG00000000760	368916	ZDB-GENE-030616-621	znf511	Human	118472	28445	ZNF511	14	14.4	high	Yes	Yes	Compara, Hieranoid, Homologene, Inparanoid, OMA, OrthoDB, OrthoFinder, OrthoInspector, orthoMCL, Panther, Phylome, RoundUp, TreeFam, ZFIN
ENSDARG00000000767	30117	ZDB-GENE-980526-164	spi1b	Human	6688	11241	SPI1	15	15.3	high	Yes	Yes	Compara, eggNOG, Hieranoid, Homologene, Inparanoid, OMA, OrthoDB, OrthoFinder, OrthoInspector, orthoMCL, Panther, Phylome, RoundUp, TreeFam, ZFIN
ENSDARG00000000779	317732	ZDB-GENE-030116-3	scfd1	Human	23256	20726	SCFD1	12	12.22	high	Yes	Yes	Compara, eggNOG, Hieranoid, Homologene, OMA, OrthoDB, OrthoFinder, orthoMCL, Panther, Phylome, TreeFam, ZFIN
ENSDARG00000000796	431720	ZDB-GENE-040704-11	nr4a1	Human	3164	7980	NR4A1	14	14.34	high	Yes	Yes	Compara, eggNOG, Hieranoid, Homologene, Inparanoid, OMA, OrthoDB, OrthoFinder, OrthoInspector, orthoMCL, Panther, Phylome, RoundUp, ZFIN
ENSDARG00000000804	751594	ZDB-GENE-030616-513	rassf6	Human	166824	20796	RASSF6	15	15.3	high	Yes	Yes	Compara, eggNOG, Hieranoid, Homologene, Inparanoid, OMA, OrthoDB, OrthoFinder, OrthoInspector, orthoMCL, Panther, Phylome, RoundUp, TreeFam, ZFIN
ENSDARG00000000830	777634	ZDB-GENE-061103-523	telo2	Human	9894	29099	TELO2	14	14.29	high	Yes	Yes	Compara, eggNOG, Hieranoid, Homologene, Inparanoid, OMA, OrthoFinder, OrthoInspector, orthoMCL, Panther, Phylome, RoundUp, TreeFam, ZFIN
ENSDARG00000000837	368424	ZDB-GENE-030616-66	snx9a	Human	51429	14973	SNX9	8	8.25	moderate	Yes	No	Compara, eggNOG, OrthoDB, OrthoFinder, orthoMCL, Panther, Phylome, ZFIN
ENSDARG00000000853	402922	ZDB-GENE-040826-2	dstyk	Human	25778	29043	DSTYK	15	15.3	high	Yes	Yes	Compara, eggNOG, Hieranoid, Homologene, Inparanoid, OMA, OrthoDB, OrthoFinder, OrthoInspector, orthoMCL, Panther, Phylome, RoundUp, TreeFam, ZFIN
ENSDARG00000000857	65237	ZDB-GENE-010202-2	mapk14a	Human	1432	6876	MAPK14	14	14.3	high	Yes	Yes	Compara, eggNOG, Hieranoid, Homologene, Inparanoid, OMA, OrthoDB, OrthoFinder, orthoMCL, Panther, Phylome, RoundUp, TreeFam, ZFIN
ENSDARG00000000861	368473	ZDB-GENE-030616-572	scrib	Human	23513	30377	SCRIB	13	13.47	high	Yes	Yes	Hieranoid, Homologene, Inparanoid, OMA, OrthoDB, OrthoFinder, OrthoInspector, orthoMCL, Panther, Phylome, RoundUp, TreeFam, ZFIN
ENSDARG00000000887	405758	ZDB-GENE-040426-2099	zgc:56699	Human	121355	26565	GTSF1	13	12.79	high	Yes	Yes	Compara, eggNOG, Hieranoid, Homologene, Inparanoid, OMA, OrthoFinder, OrthoInspector, orthoMCL, Panther, Phylome, RoundUp, TreeFam
ENSDARG00000000906	368564	ZDB-GENE-030616-438	skap2	Human	8935	15687	SKAP2	15	15.3	high	Yes	Yes	Compara, eggNOG, Hieranoid, Homologene, Inparanoid, OMA, OrthoDB, OrthoFinder, OrthoInspector, orthoMCL, Panther, Phylome, RoundUp, TreeFam, ZFIN
ENSDARG00000000935	393205	ZDB-GENE-040426-707	unk	Human	85451	29369	UNK	13	13.29	high	Yes	Yes	Compara, eggNOG, Homologene, Inparanoid, OMA, OrthoFinder, OrthoInspector, orthoMCL, Panther, Phylome, RoundUp, TreeFam, ZFIN
ENSDARG00000000943	402875	ZDB-GENE-040526-1	dzip1	Human	22873	20908	DZIP1	14	14.3	high	Yes	Yes	Compara, eggNOG, Homologene, Inparanoid, OMA, OrthoDB, OrthoFinder, OrthoInspector, orthoMCL, Panther, Phylome, RoundUp, TreeFam, ZFIN
ENSDARG00000000966	561503	ZDB-GENE-030616-81	ncor2	Human	9612	7673	NCOR2	11	11.53	high	Yes	Yes	Compara, Homologene, Inparanoid, OMA, OrthoDB, OrthoFinder, OrthoInspector, orthoMCL, Panther, RoundUp, ZFIN
ENSDARG00000001014	561431	ZDB-GENE-030131-998	myh9b	Human	4627	7579	MYH9	12	12.25	high	Yes	Yes	Compara, eggNOG, Hieranoid, OMA, OrthoDB, OrthoFinder, orthoMCL, Panther, Phylome, RoundUp, TreeFam, ZFIN
ENSDARG00000001015	368610	ZDB-GENE-030616-498	znf384l	Human	171017	11955	ZNF384	11	10.89	high	Yes	Yes	Compara, Hieranoid, Homologene, Inparanoid, OMA, OrthoDB, OrthoFinder, OrthoInspector, orthoMCL, RoundUp, TreeFam
ENSDARG00000001057	394081	ZDB-GENE-040426-1287	bysl	Human	705	1157	BYSL	11	11.21	high	Yes	Yes	Compara, eggNOG, Hieranoid, Homologene, OMA, OrthoFinder, orthoMCL, Panther, Phylome, TreeFam, ZFIN
ENSDARG00000001127	494492	ZDB-GENE-050105-4	slc17a6a	Human	57084	16703	SLC17A6	11	11.29	high	Yes	Yes	Compara, eggNOG, Hieranoid, Homologene, Inparanoid, OrthoFinder, OrthoInspector, orthoMCL, Panther, Phylome, ZFIN
ENSDARG00000001129	324724	ZDB-GENE-030131-3445	dicer1	Human	23405	17098	DICER1	15	15.3	high	Yes	Yes	Compara, eggNOG, Hieranoid, Homologene, Inparanoid, OMA, OrthoDB, OrthoFinder, OrthoInspector, orthoMCL, Panther, Phylome, RoundUp, TreeFam, ZFIN
ENSDARG00000001154	563166	ZDB-GENE-040724-96	rimbp2	Human	23504	30339	RIMBP2	10	10.39	high	Yes	Yes	Compara, Homologene, OMA, OrthoDB, OrthoFinder, orthoMCL, Panther, Phylome, RoundUp, ZFIN
ENSDARG00000001162	556124	ZDB-GENE-030616-40	matr3l1.1	Human	9782	6912	MATR3	2	2.6	moderate	Yes	No	Panther, ZFIN
ENSDARG00000001169	64815	ZDB-GENE-010110-1	hsd17b8	Human	7923	3554	HSD17B8	15	15.3	high	Yes	Yes	Compara, eggNOG, Hieranoid, Homologene, Inparanoid, OMA, OrthoDB, OrthoFinder, OrthoInspector, orthoMCL, Panther, Phylome, RoundUp, TreeFam, ZFIN
ENSDARG00000001210	751672	ZDB-GENE-060825-216	arl14ep	Human	120534	26798	ARL14EP	10	10.28	high	Yes	Yes	Compara, eggNOG, OrthoDB, OrthoFinder, OrthoInspector, orthoMCL, Panther, Phylome, RoundUp, ZFIN
ENSDARG00000001220	368439	ZDB-GENE-030616-132	mycbp2	Human	23077	23386	MYCBP2	12	12.24	high	Yes	Yes	Compara, eggNOG, Hieranoid, Homologene, OMA, OrthoFinder, orthoMCL, Panther, Phylome, RoundUp, TreeFam, ZFIN
ENSDARG00000001234	678610	ZDB-GENE-030616-163	map4k2	Human	5871	6864	MAP4K2	14	14.2	high	Yes	Yes	Compara, eggNOG, Hieranoid, Homologene, Inparanoid, OMA, OrthoDB, OrthoFinder, OrthoInspector, orthoMCL, Phylome, RoundUp, TreeFam, ZFIN
ENSDARG00000001241	415211	ZDB-GENE-040625-116	puf60b	Human	22827	17042	PUF60	9	9.21	moderate	Yes	No	Compara, eggNOG, OrthoDB, OrthoFinder, orthoMCL, Panther, Phylome, TreeFam, ZFIN
ENSDARG00000001244	406751	ZDB-GENE-040426-2789	srrm1	Human	10250	16638	SRRM1	11	11.35	high	Yes	Yes	Compara, eggNOG, Hieranoid, Inparanoid, OMA, OrthoFinder, OrthoInspector, orthoMCL, Panther, TreeFam, ZFIN
ENSDARG00000001249	368900	ZDB-GENE-030616-605	pcgf1	Human	84759	17615	PCGF1	13	13.44	high	Yes	Yes	Compara, Hieranoid, Homologene, Inparanoid, OMA, OrthoDB, OrthoFinder, OrthoInspector, orthoMCL, Panther, Phylome, RoundUp, ZFIN
ENSDARG00000001259	557312	-	gas2	Human	2620	4167	GAS2	12	11.7	high	Yes	Yes	Compara, eggNOG, Hieranoid, Inparanoid, OMA, OrthoDB, OrthoFinder, OrthoInspector, orthoMCL, Phylome, RoundUp, TreeFam
ENSDARG00000001303	30666	ZDB-GENE-990415-141	psmb8a	Human	5696	9545	PSMB8	15	15.3	high	Yes	Yes	Compara, eggNOG, Hieranoid, Homologene, Inparanoid, OMA, OrthoDB, OrthoFinder, OrthoInspector, orthoMCL, Panther, Phylome, RoundUp, TreeFam, ZFIN
ENSDARG00000001313	368848	ZDB-GENE-030616-400	g2e3	Human	55632	20338	G2E3	14	14.29	high	Yes	Yes	Compara, eggNOG, Hieranoid, Homologene, Inparanoid, OMA, OrthoFinder, OrthoInspector, orthoMCL, Panther, Phylome, RoundUp, TreeFam, ZFIN
ENSDARG00000001354	561024	ZDB-GENE-030616-628	slc6a22.2	Human	6539	11045	SLC6A12	5	4.97	high	Yes	Yes	OrthoDB, OrthoFinder, orthoMCL, Panther, TreeFam
ENSDARG00000001414	562393	ZDB-GENE-040724-63	mctp2a	Human	55784	25636	MCTP2	9	9.46	high	Yes	Yes	Compara, Homologene, Inparanoid, OrthoDB, OrthoInspector, Panther, Phylome, TreeFam, ZFIN
ENSDARG00000001431	323320	ZDB-GENE-030131-2040	actn3b	Human	89	165	ACTN3	11	11.54	high	Yes	Yes	Compara, Hieranoid, Inparanoid, OMA, OrthoDB, OrthoFinder, OrthoInspector, Panther, Phylome, RoundUp, ZFIN
ENSDARG00000001437	555778	ZDB-GENE-030131-3158	slc2a1a	Human	6513	11005	SLC2A1	14	14.29	high	Yes	Yes	Compara, eggNOG, Hieranoid, Homologene, Inparanoid, OrthoDB, OrthoFinder, OrthoInspector, orthoMCL, Panther, Phylome, RoundUp, TreeFam, ZFIN
ENSDARG00000001442	368433	ZDB-GENE-030616-75	inppl1b	Human	3636	6080	INPPL1	5	4.86	moderate	Yes	No	eggNOG, OrthoFinder, orthoMCL, Panther, TreeFam
ENSDARG00000001447	566167	ZDB-GENE-070705-170	mier1b	Human	57708	29657	MIER1	14	14.3	high	Yes	Yes	Compara, eggNOG, Hieranoid, Inparanoid, OMA, OrthoDB, OrthoFinder, OrthoInspector, orthoMCL, Panther, Phylome, RoundUp, TreeFam, ZFIN
ENSDARG00000001452	368917	ZDB-GENE-030616-622	adam8a	Human	101	215	ADAM8	14	14.4	high	Yes	Yes	Compara, eggNOG, Hieranoid, Homologene, Inparanoid, OMA, OrthoDB, OrthoFinder, OrthoInspector, Panther, Phylome, RoundUp, TreeFam, ZFIN
ENSDARG00000001463	556781	ZDB-GENE-070620-14	tdh2	Human	157739	15547	TDH	1	1.1	low	Yes	No	Panther
ENSDARG00000001470	565708	ZDB-GENE-070705-176	mhc1zea	Human	3133	4962	HLA-E	4	4.05	moderate	Yes	No	eggNOG, Inparanoid, OrthoInspector, Panther
ENSDARG00000001470	565708	ZDB-GENE-070705-176	mhc1zea	Human	3105	4931	HLA-A	4	4.05	moderate	Yes	No	Homologene, Inparanoid, orthoMCL, Panther
ENSDARG00000001498	563784	ZDB-GENE-090721-1	skap1	Human	8631	15605	SKAP1	15	15.3	high	Yes	Yes	Compara, eggNOG, Hieranoid, Homologene, Inparanoid, OMA, OrthoDB, OrthoFinder, OrthoInspector, orthoMCL, Panther, Phylome, RoundUp, TreeFam, ZFIN
ENSDARG00000001549	558652	ZDB-GENE-070410-111	sp3a	Human	6670	11208	SP3	11	11.39	high	Yes	Yes	Compara, Homologene, Inparanoid, OMA, OrthoDB, OrthoFinder, OrthoInspector, orthoMCL, RoundUp, TreeFam, ZFIN
ENSDARG00000001557	323361	ZDB-GENE-030131-2081	tomm34	Human	10953	15746	TOMM34	15	15.3	high	Yes	Yes	Compara, eggNOG, Hieranoid, Homologene, Inparanoid, OMA, OrthoDB, OrthoFinder, OrthoInspector, orthoMCL, Panther, Phylome, RoundUp, TreeFam, ZFIN
ENSDARG00000001558	30453	ZDB-GENE-000208-21	kifc1	Human	3833	6389	KIFC1	15	15.3	high	Yes	Yes	Compara, eggNOG, Hieranoid, Homologene, Inparanoid, OMA, OrthoDB, OrthoFinder, OrthoInspector, orthoMCL, Panther, Phylome, RoundUp, TreeFam, ZFIN
ENSDARG00000001559	565460	ZDB-GENE-030616-39	csmd2	Human	114784	19290	CSMD2	11	11.38	high	Yes	Yes	Compara, Hieranoid, Homologene, OMA, OrthoFinder, OrthoInspector, orthoMCL, Panther, Phylome, RoundUp, ZFIN
ENSDARG00000001572	559849	ZDB-GENE-060503-461	prf1.3	Human	5551	9360	PRF1	5	4.9	moderate	Yes	No	Compara, eggNOG, OMA, Panther, TreeFam
ENSDARG00000001578	368912	ZDB-GENE-030616-617	echs1	Human	1892	3151	ECHS1	15	15.3	high	Yes	Yes	Compara, eggNOG, Hieranoid, Homologene, Inparanoid, OMA, OrthoDB, OrthoFinder, OrthoInspector, orthoMCL, Panther, Phylome, RoundUp, TreeFam, ZFIN
ENSDARG00000001621	573719	ZDB-GENE-040718-491	nfyal	Human	4800	7804	NFYA	9	8.83	moderate	Yes	No	Compara, eggNOG, Homologene, OMA, OrthoFinder, orthoMCL, Panther, RoundUp, TreeFam
ENSDARG00000001634	405804	ZDB-GENE-040426-2126	kirrel1a	Human	55243	15734	KIRREL1	15	15.3	high	Yes	Yes	Compara, eggNOG, Hieranoid, Homologene, Inparanoid, OMA, OrthoDB, OrthoFinder, OrthoInspector, orthoMCL, Panther, Phylome, RoundUp, TreeFam, ZFIN
ENSDARG00000001656	64280	ZDB-GENE-001208-2	psmb10	Human	5699	9538	PSMB10	5	4.97	moderate	Yes	No	eggNOG, OrthoDB, OrthoFinder, Panther, TreeFam
ENSDARG00000001656	64280	ZDB-GENE-001208-2	psmb10	Human	5695	9544	PSMB7	5	4.91	moderate	Yes	No	eggNOG, OrthoDB, OrthoFinder, orthoMCL, Panther
ENSDARG00000001676	503756	ZDB-GENE-030710-10	gpm6bb	Human	2824	4461	GPM6B	10	10.36	moderate	Yes	No	Compara, Hieranoid, OMA, OrthoDB, OrthoFinder, OrthoInspector, orthoMCL, Panther, Phylome, ZFIN
ENSDARG00000001686	570547	ZDB-GENE-040724-238	uckl1a	Human	54963	15938	UCKL1	10	10.31	moderate	Yes	No	eggNOG, OrthoDB, OrthoFinder, OrthoInspector, orthoMCL, Panther, Phylome, RoundUp, TreeFam, ZFIN
ENSDARG00000001710	561345	ZDB-GENE-020430-1	flot1a	Human	10211	3757	FLOT1	15	15.3	high	Yes	Yes	Compara, eggNOG, Hieranoid, Homologene, Inparanoid, OMA, OrthoDB, OrthoFinder, OrthoInspector, orthoMCL, Panther, Phylome, RoundUp, TreeFam, ZFIN
ENSDARG00000001712	796753	ZDB-GENE-141216-101	si:ch211-247n2.1	Human	10242	6286	KCNMB2	13	12.77	high	Yes	Yes	Compara, eggNOG, Hieranoid, Homologene, Inparanoid, OMA, OrthoDB, OrthoFinder, OrthoInspector, orthoMCL, Panther, Phylome, TreeFam
ENSDARG00000001721	568941	ZDB-GENE-070912-300	oc90	Human	729330	8100	OC90	6	6.33	high	Yes	Yes	Compara, eggNOG, OrthoFinder, orthoMCL, Panther, ZFIN
ENSDARG00000001729	563124	ZDB-GENE-030616-405	strn3	Human	29966	15720	STRN3	10	10.21	high	Yes	Yes	Compara, eggNOG, Homologene, OMA, OrthoFinder, orthoMCL, Panther, Phylome, TreeFam, ZFIN
ENSDARG00000001733	368404	ZDB-GENE-030616-21	gulp1a	Human	51454	18649	GULP1	14	14.4	high	Yes	Yes	Compara, Hieranoid, Homologene, Inparanoid, OMA, OrthoDB, OrthoFinder, OrthoInspector, orthoMCL, Panther, Phylome, RoundUp, TreeFam, ZFIN
ENSDARG00000001734	393858	ZDB-GENE-040426-1849	fkbp8	Human	23770	3724	FKBP8	15	15.3	high	Yes	Yes	Compara, eggNOG, Hieranoid, Homologene, Inparanoid, OMA, OrthoDB, OrthoFinder, OrthoInspector, orthoMCL, Panther, Phylome, RoundUp, TreeFam, ZFIN
ENSDARG00000001754	58013	ZDB-GENE-000607-75	noc2l	Human	26155	24517	NOC2L	12	12.43	high	Yes	Yes	Compara, eggNOG, Homologene, Inparanoid, OMA, OrthoDB, OrthoFinder, OrthoInspector, orthoMCL, Panther, RoundUp, ZFIN
ENSDARG00000001760	100536295	ZDB-GENE-070103-5	tnxba	Human	7148	11976	TNXB	4	4.29	high	Yes	Yes	Compara, eggNOG, TreeFam, ZFIN
ENSDARG00000001767	503537	ZDB-GENE-050220-15	slc29a2	Human	3177	11004	SLC29A2	11	11.21	high	Yes	Yes	Compara, eggNOG, Hieranoid, Homologene, OMA, OrthoFinder, orthoMCL, Panther, Phylome, TreeFam, ZFIN
ENSDARG00000001769	140818	ZDB-GENE-020107-1	ptpra	Human	5786	9664	PTPRA	10	10.45	high	Yes	Yes	Compara, Homologene, Inparanoid, OMA, OrthoFinder, OrthoInspector, orthoMCL, Panther, TreeFam, ZFIN
ENSDARG00000001771	553759	ZDB-GENE-050707-1	otol1a	Human	131149	34071	OTOL1	15	15.3	high	Yes	Yes	Compara, eggNOG, Hieranoid, Homologene, Inparanoid, OMA, OrthoDB, OrthoFinder, OrthoInspector, orthoMCL, Panther, Phylome, RoundUp, TreeFam, ZFIN
ENSDARG00000001776	563901	ZDB-GENE-120404-3	stim2b	Human	57620	19205	STIM2	13	13.24	high	Yes	Yes	Compara, eggNOG, Hieranoid, Homologene, OMA, OrthoFinder, OrthoInspector, orthoMCL, Panther, Phylome, RoundUp, TreeFam, ZFIN
ENSDARG00000001777	393125	ZDB-GENE-040426-711	nup155	Human	9631	8063	NUP155	11	11.21	high	Yes	Yes	Compara, eggNOG, Hieranoid, Homologene, OMA, OrthoFinder, orthoMCL, Panther, Phylome, TreeFam, ZFIN
ENSDARG00000001781	564029	ZDB-GENE-041210-93	tspan11	Human	441631	30795	TSPAN11	13	13.4	high	Yes	Yes	Compara, Homologene, Inparanoid, OMA, OrthoDB, OrthoFinder, OrthoInspector, orthoMCL, Panther, Phylome, RoundUp, TreeFam, ZFIN
ENSDARG00000001782	393998	ZDB-GENE-040426-1351	prkacba	Human	5567	9381	PRKACB	8	8.11	moderate	Yes	No	Compara, eggNOG, OrthoDB, OrthoFinder, orthoMCL, Phylome, TreeFam, ZFIN
ENSDARG00000001785	394032	ZDB-GENE-040426-1446	irx2a	Human	153572	14359	IRX2	15	15.3	high	Yes	Yes	Compara, eggNOG, Hieranoid, Homologene, Inparanoid, OMA, OrthoDB, OrthoFinder, OrthoInspector, orthoMCL, Panther, Phylome, RoundUp, TreeFam, ZFIN
ENSDARG00000001788	335191	ZDB-GENE-050522-147	atp5po	Human	539	850	ATP5PO	15	15.3	high	Yes	Yes	Compara, eggNOG, Hieranoid, Homologene, Inparanoid, OMA, OrthoDB, OrthoFinder, OrthoInspector, orthoMCL, Panther, Phylome, RoundUp, TreeFam, ZFIN
ENSDARG00000001803	405763	ZDB-GENE-040702-5	kcnh6a	Human	81033	18862	KCNH6	9	9.2	high	Yes	Yes	Compara, eggNOG, Homologene, OrthoFinder, orthoMCL, Panther, Phylome, TreeFam, ZFIN
ENSDARG00000001804	550424	ZDB-GENE-050417-235	zgc:112148	Human	51030	20399	TVP23B	7	6.8	moderate	Yes	No	Compara, eggNOG, OMA, OrthoFinder, orthoMCL, Panther, TreeFam
ENSDARG00000001807	564874	ZDB-GENE-030131-5971	tnfrsf21	Human	27242	13469	TNFRSF21	12	12.39	high	Yes	Yes	Compara, Hieranoid, Homologene, OMA, OrthoDB, OrthoFinder, OrthoInspector, orthoMCL, Panther, Phylome, RoundUp, ZFIN
ENSDARG00000001817	798602	ZDB-GENE-130530-524	zmp:0000000521	Human	54466	20694	SPIN2A	4	3.99	moderate	Yes	No	Compara, OrthoFinder, Panther, TreeFam
ENSDARG00000001817	798602	ZDB-GENE-130530-524	zmp:0000000521	Human	474343	33147	SPIN2B	4	3.99	moderate	Yes	No	Compara, OrthoFinder, Panther, TreeFam
ENSDARG00000001818	566347	ZDB-GENE-030131-3063	c3b.2	Human	718	1318	C3	5	5.47	moderate	Yes	No	eggNOG, OrthoDB, Panther, TreeFam, ZFIN
ENSDARG00000001825	568701	ZDB-GENE-080815-3	cfap43	Human	80217	26684	CFAP43	9	9.3	high	Yes	Yes	Compara, eggNOG, Homologene, OMA, OrthoFinder, orthoMCL, Panther, TreeFam, ZFIN
ENSDARG00000001829	503771	ZDB-GENE-050306-55	zgc:112982	Human	256643	27413	BCLAF3	1	1.1	low	Yes	No	Panther
ENSDARG00000001835	548345	ZDB-GENE-050410-12	nalcn	Human	259232	19082	NALCN	13	13.39	high	Yes	Yes	Compara, eggNOG, Homologene, Inparanoid, OMA, OrthoDB, OrthoFinder, OrthoInspector, orthoMCL, Panther, RoundUp, TreeFam, ZFIN
ENSDARG00000001857	556421	ZDB-GENE-100910-5	aff4	Human	27125	17869	AFF4	11	11.49	high	Yes	Yes	Compara, eggNOG, Homologene, Inparanoid, OMA, OrthoDB, OrthoFinder, Panther, RoundUp, TreeFam, ZFIN
ENSDARG00000001859	30416	ZDB-GENE-000128-11	dbx1b	Human	120237	33185	DBX1	14	14.29	high	Yes	Yes	Compara, eggNOG, Hieranoid, Homologene, Inparanoid, OMA, OrthoFinder, OrthoInspector, orthoMCL, Panther, Phylome, RoundUp, TreeFam, ZFIN
ENSDARG00000001870	64615	ZDB-GENE-001212-4	atp1a1a.4	Human	476	799	ATP1A1	10	10.2	moderate	Yes	No	Compara, eggNOG, Hieranoid, Homologene, OrthoFinder, orthoMCL, Panther, Phylome, TreeFam, ZFIN
ENSDARG00000001873	321928	ZDB-GENE-030131-647	phgdh	Human	26227	8923	PHGDH	15	15.3	high	Yes	Yes	Compara, eggNOG, Hieranoid, Homologene, Inparanoid, OMA, OrthoDB, OrthoFinder, OrthoInspector, orthoMCL, Panther, Phylome, RoundUp, TreeFam, ZFIN
ENSDARG00000001879	557290	ZDB-GENE-061207-13	nav2b	Human	89797	15997	NAV2	6	6.39	moderate	Yes	No	Compara, eggNOG, OrthoFinder, Panther, TreeFam, ZFIN
ENSDARG00000001880	393515	ZDB-GENE-040426-1489	stx3a	Human	6809	11438	STX3	11	10.91	high	Yes	Yes	Compara, Hieranoid, Homologene, Inparanoid, OMA, OrthoDB, OrthoFinder, OrthoInspector, orthoMCL, Panther, Phylome
ENSDARG00000001881	565158	ZDB-GENE-060221-2	cacnb3a	Human	784	1403	CACNB3	8	8.4	high	Yes	Yes	Compara, eggNOG, Homologene, OMA, OrthoFinder, Panther, TreeFam, ZFIN
ENSDARG00000001882	559380	ZDB-GENE-050904-1	kbtbd12	Human	166348	25731	KBTBD12	13	13.37	high	Yes	Yes	Compara, Hieranoid, Homologene, Inparanoid, OMA, OrthoDB, OrthoFinder, OrthoInspector, orthoMCL, Panther, Phylome, TreeFam, ZFIN
ENSDARG00000001888	30672	ZDB-GENE-991102-16	ppm1ba	Human	5495	9276	PPM1B	11	11.21	moderate	Yes	No	Compara, eggNOG, Hieranoid, Homologene, OrthoDB, OrthoFinder, orthoMCL, Panther, Phylome, TreeFam, ZFIN
ENSDARG00000001889	573216	ZDB-GENE-090507-4	tuba1a	Human	7846	20766	TUBA1A	14	14.39	high	Yes	Yes	Compara, eggNOG, Hieranoid, Homologene, Inparanoid, OMA, OrthoDB, OrthoFinder, OrthoInspector, orthoMCL, Panther, RoundUp, TreeFam, ZFIN
ENSDARG00000001890	323918	ZDB-GENE-030131-2638	stt3b	Human	201595	30611	STT3B	11	11.49	high	Yes	Yes	Compara, eggNOG, Inparanoid, OMA, OrthoDB, OrthoFinder, OrthoInspector, Panther, RoundUp, TreeFam, ZFIN
ENSDARG00000001891	561547	ZDB-GENE-041014-36	syt14b	Human	255928	23143	SYT14	3	2.94	moderate	Yes	No	Compara, Panther, Phylome
ENSDARG00000001897	541519	ZDB-GENE-050327-52	man2b1	Human	4125	6826	MAN2B1	12	12.22	high	Yes	Yes	Compara, eggNOG, Hieranoid, Homologene, OMA, OrthoDB, OrthoFinder, orthoMCL, Panther, Phylome, TreeFam, ZFIN
ENSDARG00000001898	447827	ZDB-GENE-040912-87	manea	Human	79694	21072	MANEA	11	10.99	high	Yes	Yes	Compara, eggNOG, Homologene, Inparanoid, OMA, OrthoDB, OrthoFinder, OrthoInspector, Panther, RoundUp, TreeFam
ENSDARG00000001906	559089	ZDB-GENE-091204-249	si:dkey-247m21.3	Human	3360	5299	HTR4	6	5.87	moderate	Yes	No	Hieranoid, OrthoFinder, orthoMCL, Panther, Phylome, TreeFam
ENSDARG00000001909	555361	ZDB-GENE-081222-1	vill	Human	50853	30906	VILL	8	8.21	high	Yes	Yes	Compara, eggNOG, OrthoDB, orthoMCL, Panther, Phylome, TreeFam, ZFIN
ENSDARG00000001910	554722	ZDB-GENE-040426-855	rorab	Human	6095	10258	RORA	6	6.36	moderate	Yes	No	eggNOG, OrthoFinder, orthoMCL, Panther, TreeFam, ZFIN
ENSDARG00000001912	503566	ZDB-GENE-051113-172	drd4-rs	Human	1815	3025	DRD4	4	3.97	moderate	Yes	No	OrthoDB, OrthoFinder, OrthoInspector, TreeFam
ENSDARG00000001913	559824	ZDB-GENE-070705-48	palmda	Human	54873	15846	PALMD	7	7.29	high	Yes	Yes	Compara, eggNOG, OrthoFinder, orthoMCL, Panther, TreeFam, ZFIN
ENSDARG00000001929	494085	ZDB-GENE-041212-53	pink1	Human	65018	14581	PINK1	10	10.28	high	Yes	Yes	eggNOG, Hieranoid, Homologene, OMA, OrthoFinder, orthoMCL, Panther, Phylome, TreeFam, ZFIN
ENSDARG00000001930	445186	ZDB-GENE-040801-99	klhl15	Human	80311	29347	KLHL15	14	14.4	high	Yes	Yes	Compara, Hieranoid, Homologene, Inparanoid, OMA, OrthoDB, OrthoFinder, OrthoInspector, orthoMCL, Panther, Phylome, RoundUp, TreeFam, ZFIN
ENSDARG00000001933	568316	ZDB-GENE-070912-442	prkag2b	Human	51422	9386	PRKAG2	9	9.3	moderate	Yes	No	Compara, eggNOG, Homologene, OrthoDB, OrthoInspector, orthoMCL, Panther, TreeFam, ZFIN
ENSDARG00000001937	100334818	-	LOC100334818	Human	6513	11005	SLC2A1	4	4.01	moderate	Yes	No	eggNOG, OrthoDB, OrthoFinder, Panther
ENSDARG00000001939	192334	ZDB-GENE-020419-3	b3gat3	Human	26229	923	B3GAT3	13	13.29	high	Yes	Yes	Compara, eggNOG, Hieranoid, Homologene, OMA, OrthoDB, OrthoFinder, OrthoInspector, orthoMCL, Panther, Phylome, RoundUp, ZFIN
ENSDARG00000001940	553324	ZDB-GENE-061103-529	dnajc1	Human	64215	20090	DNAJC1	9	9.3	high	Yes	Yes	Compara, eggNOG, Homologene, OMA, OrthoFinder, orthoMCL, Panther, TreeFam, ZFIN
ENSDARG00000001950	445486	ZDB-GENE-040822-37	ak1	Human	203	361	AK1	15	15.3	high	Yes	Yes	Compara, eggNOG, Hieranoid, Homologene, Inparanoid, OMA, OrthoDB, OrthoFinder, OrthoInspector, orthoMCL, Panther, Phylome, RoundUp, TreeFam, ZFIN
ENSDARG00000001953	554477	ZDB-GENE-040426-2724	pfkfb3	Human	5209	8874	PFKFB3	13	13.44	high	Yes	Yes	Compara, Hieranoid, Homologene, Inparanoid, OMA, OrthoDB, OrthoFinder, OrthoInspector, orthoMCL, Panther, Phylome, RoundUp, ZFIN
ENSDARG00000001968	571688	ZDB-GENE-080108-4	dock5	Human	80005	23476	DOCK5	10	10.31	high	Yes	Yes	Compara, eggNOG, Homologene, OMA, OrthoDB, OrthoFinder, orthoMCL, Panther, TreeFam, ZFIN
ENSDARG00000001969	324984	ZDB-GENE-060616-122	txlng	Human	55787	18578	TXLNG	15	15.3	high	Yes	Yes	Compara, eggNOG, Hieranoid, Homologene, Inparanoid, OMA, OrthoDB, OrthoFinder, OrthoInspector, orthoMCL, Panther, Phylome, RoundUp, TreeFam, ZFIN
ENSDARG00000001971	566140	ZDB-GENE-050420-46	cthrc1b	Human	115908	18831	CTHRC1	13	13.37	high	Yes	Yes	Compara, eggNOG, Hieranoid, Homologene, Inparanoid, OMA, OrthoDB, OrthoFinder, OrthoInspector, Panther, Phylome, TreeFam, ZFIN
ENSDARG00000001975	334098	ZDB-GENE-030131-6030	hsd11b2	Human	3291	5209	HSD11B2	15	15.3	high	Yes	Yes	Compara, eggNOG, Hieranoid, Homologene, Inparanoid, OMA, OrthoDB, OrthoFinder, OrthoInspector, orthoMCL, Panther, Phylome, RoundUp, TreeFam, ZFIN
ENSDARG00000001976	497400	ZDB-GENE-050208-116	fkbp16	Human	23770	3724	FKBP8	2	1.86	moderate	Yes	No	eggNOG, TreeFam
ENSDARG00000001993	100002040	ZDB-GENE-081124-1	myhb	Human	4622	7574	MYH4	8	7.8	moderate	Yes	No	Compara, eggNOG, Homologene, OMA, OrthoFinder, orthoMCL, Panther, TreeFam
ENSDARG00000001994	574003	ZDB-GENE-050626-106	stxbp1a	Human	6812	11444	STXBP1	12	12.22	high	Yes	Yes	Compara, eggNOG, Hieranoid, Homologene, OMA, OrthoDB, OrthoFinder, orthoMCL, Panther, Phylome, TreeFam, ZFIN
ENSDARG00000001999	100150128	ZDB-GENE-070815-1	adamts18	Human	170692	17110	ADAMTS18	14	14.27	high	Yes	Yes	Compara, eggNOG, Hieranoid, Homologene, Inparanoid, OMA, OrthoDB, OrthoFinder, OrthoInspector, orthoMCL, Panther, Phylome, TreeFam, ZFIN
ENSDARG00000002002	394045	ZDB-GENE-040426-1067	lmcd1	Human	29995	6633	LMCD1	10	10.51	high	Yes	Yes	Compara, Homologene, Inparanoid, OMA, OrthoDB, OrthoFinder, OrthoInspector, Panther, Phylome, ZFIN
ENSDARG00000002006	30486	ZDB-GENE-990415-242	rxrbb	Human	6257	10478	RXRB	9	9.35	moderate	Yes	No	Compara, Hieranoid, Homologene, Inparanoid, orthoMCL, Panther, Phylome, TreeFam, ZFIN
ENSDARG00000002013	446167	ZDB-GENE-040822-32	grb10a	Human	2887	4564	GRB10	12	12.26	moderate	Yes	No	Compara, eggNOG, Hieranoid, Inparanoid, OrthoDB, OrthoFinder, OrthoInspector, orthoMCL, Panther, Phylome, TreeFam, ZFIN
ENSDARG00000002016	393966	ZDB-GENE-040426-1096	ppil2	Human	23759	9261	PPIL2	12	12.22	high	Yes	Yes	Compara, eggNOG, Hieranoid, Homologene, OMA, OrthoDB, OrthoFinder, orthoMCL, Panther, Phylome, TreeFam, ZFIN
ENSDARG00000002020	561835	ZDB-GENE-070810-5	rictorb	Human	253260	28611	RICTOR	15	15.3	high	Yes	Yes	Compara, eggNOG, Hieranoid, Homologene, Inparanoid, OMA, OrthoDB, OrthoFinder, OrthoInspector, orthoMCL, Panther, Phylome, RoundUp, TreeFam, ZFIN
ENSDARG00000002021	403051	ZDB-GENE-040928-2	pygb	Human	5834	9723	PYGB	11	11.21	high	Yes	Yes	Compara, eggNOG, Hieranoid, Homologene, OMA, OrthoFinder, orthoMCL, Panther, Phylome, TreeFam, ZFIN
ENSDARG00000002026	100462714	ZDB-GENE-081028-54	qkib	Human	9444	21100	QKI	10	10.34	moderate	Yes	No	Compara, eggNOG, Homologene, OMA, OrthoDB, OrthoFinder, OrthoInspector, RoundUp, TreeFam, ZFIN
ENSDARG00000002031	559853	ZDB-GENE-070912-576	tox4a	Human	9878	20161	TOX4	13	13.29	high	Yes	Yes	Compara, eggNOG, Hieranoid, Inparanoid, OrthoDB, OrthoFinder, OrthoInspector, orthoMCL, Panther, Phylome, RoundUp, TreeFam, ZFIN
ENSDARG00000002037	564852	ZDB-GENE-120222-1	pfkfb2b	Human	5208	8873	PFKFB2	12	12.22	moderate	Yes	No	Compara, eggNOG, Hieranoid, Homologene, OMA, OrthoDB, OrthoFinder, orthoMCL, Panther, Phylome, TreeFam, ZFIN
ENSDARG00000002060	445142	ZDB-GENE-040801-43	brf2	Human	55290	17298	BRF2	14	14.27	high	Yes	Yes	Compara, eggNOG, Hieranoid, Homologene, Inparanoid, OMA, OrthoDB, OrthoFinder, OrthoInspector, orthoMCL, Panther, Phylome, TreeFam, ZFIN
ENSDARG00000002071	550502	ZDB-GENE-050417-337	adss	Human	159	292	ADSS	15	15.3	high	Yes	Yes	Compara, eggNOG, Hieranoid, Homologene, Inparanoid, OMA, OrthoDB, OrthoFinder, OrthoInspector, orthoMCL, Panther, Phylome, RoundUp, TreeFam, ZFIN
ENSDARG00000002077	450080	ZDB-GENE-041010-203	mnat1	Human	4331	7181	MNAT1	15	15.3	high	Yes	Yes	Compara, eggNOG, Hieranoid, Homologene, Inparanoid, OMA, OrthoDB, OrthoFinder, OrthoInspector, orthoMCL, Panther, Phylome, RoundUp, TreeFam, ZFIN
ENSDARG00000002082	30502	ZDB-GENE-990415-27	csnk2a1	Human	1457	2457	CSNK2A1	12	12.19	high	Yes	Yes	Compara, eggNOG, Hieranoid, Inparanoid, OrthoDB, OrthoFinder, OrthoInspector, orthoMCL, Phylome, RoundUp, TreeFam, ZFIN
ENSDARG00000002084	337767	ZDB-GENE-081030-4	lamb2	Human	3913	6487	LAMB2	15	15.3	high	Yes	Yes	Compara, eggNOG, Hieranoid, Homologene, Inparanoid, OMA, OrthoDB, OrthoFinder, OrthoInspector, orthoMCL, Panther, Phylome, RoundUp, TreeFam, ZFIN
ENSDARG00000002127	386967	ZDB-GENE-031118-123	stam	Human	8027	11357	STAM	15	15.3	high	Yes	Yes	Compara, eggNOG, Hieranoid, Homologene, Inparanoid, OMA, OrthoDB, OrthoFinder, OrthoInspector, orthoMCL, Panther, Phylome, RoundUp, TreeFam, ZFIN
ENSDARG00000002128	387304	ZDB-GENE-031204-5	cwf19l1	Human	55280	25613	CWF19L1	15	15.3	high	Yes	Yes	Compara, eggNOG, Hieranoid, Homologene, Inparanoid, OMA, OrthoDB, OrthoFinder, OrthoInspector, orthoMCL, Panther, Phylome, RoundUp, TreeFam, ZFIN
ENSDARG00000002131	373117	ZDB-GENE-030826-35	celf2	Human	10659	2550	CELF2	14	14.4	high	Yes	Yes	Compara, Hieranoid, Homologene, Inparanoid, OMA, OrthoDB, OrthoFinder, OrthoInspector, orthoMCL, Panther, Phylome, RoundUp, TreeFam, ZFIN
ENSDARG00000002165	30648	ZDB-GENE-991110-17	psme1	Human	5720	9568	PSME1	14	14.34	high	Yes	Yes	Compara, eggNOG, Hieranoid, Homologene, Inparanoid, OMA, OrthoDB, OrthoFinder, OrthoInspector, orthoMCL, Panther, Phylome, RoundUp, ZFIN
ENSDARG00000002167	436925	ZDB-GENE-040718-399	cacnb1	Human	782	1401	CACNB1	13	13.4	high	Yes	Yes	Compara, Hieranoid, Inparanoid, OMA, OrthoDB, OrthoFinder, OrthoInspector, orthoMCL, Panther, Phylome, RoundUp, TreeFam, ZFIN
ENSDARG00000002168	394172	ZDB-GENE-040426-1094	tra2b	Human	6434	10781	TRA2B	10	10.21	high	Yes	Yes	Compara, eggNOG, Hieranoid, OMA, OrthoFinder, orthoMCL, Panther, Phylome, TreeFam, ZFIN
ENSDARG00000002172	561935	ZDB-GENE-060929-512	aplnra	Human	187	339	APLNR	12	12.39	high	Yes	Yes	Compara, Hieranoid, Inparanoid, OrthoDB, OrthoFinder, OrthoInspector, orthoMCL, Panther, Phylome, RoundUp, TreeFam, ZFIN
ENSDARG00000002174	550607	ZDB-GENE-041008-161	itfg2	Human	55846	30879	ITFG2	15	15.3	high	Yes	Yes	Compara, eggNOG, Hieranoid, Homologene, Inparanoid, OMA, OrthoDB, OrthoFinder, OrthoInspector, orthoMCL, Panther, Phylome, RoundUp, TreeFam, ZFIN
ENSDARG00000002184	406843	ZDB-GENE-040426-2928	igbp1	Human	3476	5461	IGBP1	12	12.22	high	Yes	Yes	Compara, eggNOG, Hieranoid, Homologene, OMA, OrthoDB, OrthoFinder, orthoMCL, Panther, Phylome, TreeFam, ZFIN
ENSDARG00000002190	405840	ZDB-GENE-040426-2539	chmp2bb	Human	25978	24537	CHMP2B	13	13.44	high	Yes	Yes	Compara, Hieranoid, Homologene, Inparanoid, OMA, OrthoDB, OrthoFinder, OrthoInspector, orthoMCL, Panther, Phylome, RoundUp, ZFIN
ENSDARG00000002192	65228	ZDB-GENE-041105-7	aspn	Human	54829	14872	ASPN	11	11.37	high	Yes	Yes	Compara, Hieranoid, Homologene, Inparanoid, OMA, OrthoDB, orthoMCL, Panther, Phylome, TreeFam, ZFIN
ENSDARG00000002193	30295	ZDB-GENE-990415-271	rho	Human	6010	10012	RHO	10	10.38	high	Yes	Yes	Compara, Inparanoid, OrthoFinder, OrthoInspector, orthoMCL, Panther, Phylome, RoundUp, TreeFam, ZFIN
ENSDARG00000002194	554272	ZDB-GENE-051213-1	rhd	Human	6007	10009	RHD	7	7.21	high	Yes	Yes	Compara, eggNOG, OrthoDB, OrthoFinder, Phylome, TreeFam, ZFIN
ENSDARG00000002196	553688	ZDB-GENE-050522-220	bach1b	Human	571	935	BACH1	3	3.61	moderate	Yes	No	OMA, Panther, ZFIN
ENSDARG00000002197	493916	ZDB-GENE-041205-1	pygl	Human	5836	9725	PYGL	8	8.31	high	Yes	Yes	Compara, eggNOG, OMA, OrthoFinder, Panther, Phylome, TreeFam, ZFIN
ENSDARG00000002204	796767	ZDB-GENE-030131-5148	hspb11	Human	26353	30171	HSPB8	2	1.86	moderate	Yes	No	eggNOG, TreeFam
ENSDARG00000002210	449653	ZDB-GENE-041010-92	stk25a	Human	10494	11404	STK25	10	10.43	moderate	Yes	No	Compara, Inparanoid, OrthoDB, OrthoFinder, OrthoInspector, orthoMCL, Panther, Phylome, RoundUp, ZFIN
ENSDARG00000002213	245946	ZDB-GENE-020507-2	invs	Human	27130	17870	INVS	11	11.48	high	Yes	Yes	Compara, Homologene, Inparanoid, OrthoDB, OrthoFinder, OrthoInspector, orthoMCL, Panther, RoundUp, TreeFam, ZFIN
ENSDARG00000002215	321129	ZDB-GENE-030131-9687	rtca	Human	8634	17981	RTCA	14	14.25	high	Yes	Yes	Compara, eggNOG, Hieranoid, Homologene, OMA, OrthoDB, OrthoFinder, OrthoInspector, orthoMCL, Panther, Phylome, RoundUp, TreeFam, ZFIN
ENSDARG00000002216	556870	ZDB-GENE-070209-80	tbx3a	Human	6926	11602	TBX3	15	15.3	high	Yes	Yes	Compara, eggNOG, Hieranoid, Homologene, Inparanoid, OMA, OrthoDB, OrthoFinder, OrthoInspector, orthoMCL, Panther, Phylome, RoundUp, TreeFam, ZFIN
ENSDARG00000002217	791709	ZDB-GENE-041010-41	scocb	Human	60592	20335	SCOC	10	10.34	moderate	Yes	No	Compara, eggNOG, OMA, OrthoDB, OrthoFinder, orthoMCL, Panther, RoundUp, TreeFam, ZFIN
ENSDARG00000002219	570552	ZDB-GENE-090313-170	si:dkey-103j14.5	Human	80150	16448	ASRGL1	5	4.9	moderate	Yes	No	eggNOG, OrthoDB, OrthoFinder, RoundUp, TreeFam
ENSDARG00000002220	449772	ZDB-GENE-041010-15	zgc:103692	Human	51759	24932	C9orf78	15	15.3	high	Yes	Yes	Compara, eggNOG, Hieranoid, Homologene, Inparanoid, OMA, OrthoDB, OrthoFinder, OrthoInspector, orthoMCL, Panther, Phylome, RoundUp, TreeFam, ZFIN
ENSDARG00000002230	436774	ZDB-GENE-040718-205	sypb	Human	6855	11506	SYP	9	9.32	moderate	Yes	No	Compara, OMA, OrthoDB, OrthoFinder, orthoMCL, Panther, Phylome, TreeFam, ZFIN
ENSDARG00000002231	563806	ZDB-GENE-140703-2	plpp2a	Human	8612	9230	PLPP2	14	14.3	high	Yes	Yes	Compara, eggNOG, Homologene, Inparanoid, OMA, OrthoDB, OrthoFinder, OrthoInspector, orthoMCL, Panther, Phylome, RoundUp, TreeFam, ZFIN
ENSDARG00000002235	373882	ZDB-GENE-030901-1	mmp14a	Human	4323	7160	MMP14	9	9.2	moderate	Yes	No	Compara, eggNOG, Homologene, OrthoFinder, orthoMCL, Panther, Phylome, TreeFam, ZFIN
ENSDARG00000002240	30388	ZDB-GENE-990415-216	psmb6	Human	5694	9543	PSMB6	11	11.21	high	Yes	Yes	Compara, eggNOG, Hieranoid, Homologene, OMA, OrthoFinder, orthoMCL, Panther, Phylome, TreeFam, ZFIN
ENSDARG00000002241	100537815	-	LOC100537815	Human	3742	6225	KCNA6	2	2.01	moderate	Yes	No	OrthoDB, OrthoFinder
ENSDARG00000002241	100537815	-	LOC100537815	Human	3741	6224	KCNA5	2	2.01	moderate	Yes	No	OrthoDB, OrthoFinder
ENSDARG00000002241	100537815	-	LOC100537815	Human	3744	6219	KCNA10	2	2.01	moderate	Yes	No	OrthoDB, OrthoFinder
ENSDARG00000002241	100537815	-	LOC100537815	Human	3737	6220	KCNA2	2	2.01	moderate	Yes	No	OrthoDB, OrthoFinder
ENSDARG00000002241	100537815	-	LOC100537815	Human	3736	6218	KCNA1	2	2.01	moderate	Yes	No	OrthoDB, OrthoFinder
ENSDARG00000002241	100537815	-	LOC100537815	Human	3743	6226	KCNA7	2	2.01	moderate	Yes	No	OrthoDB, OrthoFinder
ENSDARG00000002241	100537815	-	LOC100537815	Human	3738	6221	KCNA3	2	2.01	moderate	Yes	No	OrthoDB, OrthoFinder
ENSDARG00000002241	562853	ZDB-GENE-080204-89	kcna2b	Human	3737	6220	KCNA2	15	15.3	high	Yes	Yes	Compara, eggNOG, Hieranoid, Homologene, Inparanoid, OMA, OrthoDB, OrthoFinder, OrthoInspector, orthoMCL, Panther, Phylome, RoundUp, TreeFam, ZFIN
ENSDARG00000002249	792041	ZDB-GENE-030131-8805	tbxas1	Human	6916	11609	TBXAS1	15	15.3	high	Yes	Yes	Compara, eggNOG, Hieranoid, Homologene, Inparanoid, OMA, OrthoDB, OrthoFinder, OrthoInspector, orthoMCL, Panther, Phylome, RoundUp, TreeFam, ZFIN
ENSDARG00000002255	445478	ZDB-GENE-040822-8	epb41l3a	Human	23136	3380	EPB41L3	9	9.31	high	Yes	Yes	Compara, eggNOG, Hieranoid, OMA, OrthoFinder, Panther, Phylome, TreeFam, ZFIN
ENSDARG00000002259	768190	ZDB-GENE-061013-737	ca15c	Human	762	1375	CA4	7	6.91	moderate	Yes	No	Compara, eggNOG, OMA, OrthoDB, OrthoFinder, Panther, TreeFam
ENSDARG00000002264	553805	ZDB-GENE-050522-200	mrpl41	Human	64975	14492	MRPL41	13	13.26	high	Yes	Yes	Compara, eggNOG, Hieranoid, Homologene, Inparanoid, OMA, OrthoFinder, OrthoInspector, orthoMCL, Panther, Phylome, TreeFam, ZFIN
ENSDARG00000002267	393097	ZDB-GENE-040426-703	dcaf13	Human	25879	24535	DCAF13	13	13.26	high	Yes	Yes	Compara, eggNOG, Hieranoid, Homologene, Inparanoid, OMA, OrthoFinder, OrthoInspector, orthoMCL, Panther, Phylome, TreeFam, ZFIN
ENSDARG00000002271	393923	ZDB-GENE-040426-875	zfand5b	Human	7763	13008	ZFAND5	14	14.3	high	Yes	Yes	Compara, eggNOG, Hieranoid, Homologene, Inparanoid, OMA, OrthoDB, OrthoFinder, orthoMCL, Panther, Phylome, RoundUp, TreeFam, ZFIN
ENSDARG00000002285	406689	ZDB-GENE-040426-2704	mcoln1a	Human	57192	13356	MCOLN1	12	12.4	moderate	Yes	No	Compara, eggNOG, Inparanoid, OMA, OrthoDB, OrthoFinder, OrthoInspector, Panther, Phylome, RoundUp, TreeFam, ZFIN
ENSDARG00000002293	555440	ZDB-GENE-050208-616	si:ch211-197g15.9	Human	10561	16938	IFI44	10	9.93	moderate	Yes	No	eggNOG, Hieranoid, Homologene, Inparanoid, OMA, OrthoFinder, OrthoInspector, Panther, Phylome, TreeFam
ENSDARG00000002293	555440	ZDB-GENE-050208-616	si:ch211-197g15.9	Human	10964	17817	IFI44L	10	9.83	high	Yes	Yes	eggNOG, Hieranoid, Inparanoid, OMA, OrthoFinder, OrthoInspector, orthoMCL, Panther, Phylome, TreeFam
ENSDARG00000002295	101883345	ZDB-GENE-081105-162	si:dkey-21p1.3	Human	114088	16288	TRIM9	1	1.01	low	Yes	No	OrthoDB
ENSDARG00000002295	101883345	ZDB-GENE-081105-162	si:dkey-21p1.3	Human	440730	31859	TRIM67	1	1.01	low	Yes	No	OrthoDB
ENSDARG00000002295	101883345	ZDB-GENE-081105-162	si:dkey-21p1.3	Human	255631	20821	COL24A1	1	0.96	low	Yes	No	TreeFam
ENSDARG00000002295	101883345	ZDB-GENE-081105-162	si:dkey-21p1.3	Human	85301	22986	COL27A1	1	0.96	low	Yes	No	TreeFam
ENSDARG00000002298	393244	ZDB-GENE-040426-1120	ankrd22	Human	118932	28321	ANKRD22	10	10.31	high	Yes	Yes	Compara, Hieranoid, Homologene, OMA, OrthoFinder, orthoMCL, Panther, Phylome, TreeFam, ZFIN
ENSDARG00000002299	100332997	ZDB-GENE-081104-120	arsh	Human	414	717	ARSD	15	15.3	high	Yes	Yes	Compara, eggNOG, Hieranoid, Homologene, Inparanoid, OMA, OrthoDB, OrthoFinder, OrthoInspector, orthoMCL, Panther, Phylome, RoundUp, TreeFam, ZFIN
ENSDARG00000002300	387297	ZDB-GENE-030319-2	p2rx2	Human	22953	15459	P2RX2	11	11.21	high	Yes	Yes	Compara, eggNOG, Hieranoid, Homologene, OMA, OrthoFinder, orthoMCL, Panther, Phylome, TreeFam, ZFIN
ENSDARG00000002304	554146	ZDB-GENE-050419-19	gins2	Human	51659	24575	GINS2	15	15.3	high	Yes	Yes	Compara, eggNOG, Hieranoid, Homologene, Inparanoid, OMA, OrthoDB, OrthoFinder, OrthoInspector, orthoMCL, Panther, Phylome, RoundUp, TreeFam, ZFIN
ENSDARG00000002305	492719	ZDB-GENE-041111-294	me3	Human	10873	6985	ME3	14	14.29	high	Yes	Yes	Compara, eggNOG, Hieranoid, Homologene, Inparanoid, OrthoDB, OrthoFinder, OrthoInspector, orthoMCL, Panther, Phylome, RoundUp, TreeFam, ZFIN
ENSDARG00000002311	553579	ZDB-GENE-050522-391	fabp11b	Human	2167	3559	FABP4	7	6.81	high	Yes	Yes	Compara, eggNOG, OrthoDB, OrthoFinder, Panther, Phylome, TreeFam
ENSDARG00000002311	553579	ZDB-GENE-050522-391	fabp11b	Human	646480	3563	FABP9	7	6.72	high	Yes	Yes	Compara, eggNOG, OMA, OrthoDB, OrthoFinder, Phylome, TreeFam
ENSDARG00000002311	553579	ZDB-GENE-050522-391	fabp11b	Human	5375	9117	PMP2	7	6.71	high	Yes	Yes	Compara, eggNOG, Homologene, OrthoDB, OrthoFinder, Phylome, TreeFam
ENSDARG00000002330	378959	ZDB-GENE-031008-2	lhx8a	Human	431707	28838	LHX8	10	10.31	high	Yes	Yes	Compara, Hieranoid, Homologene, OMA, OrthoFinder, orthoMCL, Panther, Phylome, TreeFam, ZFIN
ENSDARG00000002332	321937	ZDB-GENE-050522-354	frmd6	Human	122786	19839	FRMD6	14	14.4	high	Yes	Yes	Compara, Hieranoid, Homologene, Inparanoid, OMA, OrthoDB, OrthoFinder, OrthoInspector, orthoMCL, Panther, Phylome, RoundUp, TreeFam, ZFIN
ENSDARG00000002333	557909	ZDB-GENE-041014-330	fam102bb	Human	284611	27637	FAM102B	15	15.3	high	Yes	Yes	Compara, eggNOG, Hieranoid, Homologene, Inparanoid, OMA, OrthoDB, OrthoFinder, OrthoInspector, orthoMCL, Panther, Phylome, RoundUp, TreeFam, ZFIN
ENSDARG00000002336	30120	ZDB-GENE-000125-4	dlc	Human	10683	2909	DLL3	4	4.51	moderate	Yes	No	OrthoFinder, Panther, Phylome, ZFIN
ENSDARG00000002339	449813	ZDB-GENE-041010-62	sgf29	Human	112869	25156	SGF29	13	13.39	high	Yes	Yes	Compara, eggNOG, Homologene, Inparanoid, OMA, OrthoDB, OrthoFinder, OrthoInspector, orthoMCL, Panther, RoundUp, TreeFam, ZFIN
ENSDARG00000002344	336681	ZDB-GENE-030131-8625	tubb4b	Human	10383	20771	TUBB4B	12	12.5	high	Yes	Yes	eggNOG, Hieranoid, Homologene, Inparanoid, OMA, OrthoDB, OrthoFinder, OrthoInspector, orthoMCL, Panther, RoundUp, ZFIN
ENSDARG00000002347	80374	ZDB-GENE-010306-1	cyp11a1	Human	1583	2590	CYP11A1	13	13.37	high	Yes	Yes	Compara, Hieranoid, Homologene, Inparanoid, OMA, OrthoDB, OrthoFinder, OrthoInspector, orthoMCL, Panther, Phylome, TreeFam, ZFIN
ENSDARG00000002353	393842	ZDB-GENE-040426-1877	tagapa	Human	117289	15669	TAGAP	9	9.31	moderate	Yes	No	Compara, eggNOG, OrthoDB, OrthoFinder, OrthoInspector, Panther, Phylome, TreeFam, ZFIN
ENSDARG00000002355	100001676	ZDB-GENE-060526-357	shpk	Human	23729	1492	SHPK	13	13.39	high	Yes	Yes	Compara, Hieranoid, Homologene, Inparanoid, OMA, OrthoFinder, OrthoInspector, orthoMCL, Panther, Phylome, RoundUp, TreeFam, ZFIN
ENSDARG00000002362	794012	ZDB-GENE-040718-191	ubald1a	Human	124402	29576	UBALD1	10	10.45	high	Yes	Yes	eggNOG, Homologene, Inparanoid, OMA, OrthoFinder, orthoMCL, Panther, RoundUp, TreeFam, ZFIN
ENSDARG00000002365	323020	ZDB-GENE-030131-1740	cers5	Human	91012	23749	CERS5	11	11.21	high	Yes	Yes	Compara, eggNOG, Hieranoid, Homologene, OMA, OrthoFinder, orthoMCL, Panther, Phylome, TreeFam, ZFIN
ENSDARG00000002369	550134	ZDB-GENE-050411-10	ubb	Human	7314	12463	UBB	4	4.33	moderate	Yes	No	Compara, OrthoFinder, orthoMCL, ZFIN
ENSDARG00000002369	550134	ZDB-GENE-050411-10	ubb	Human	7316	12468	UBC	4	3.91	moderate	Yes	No	Hieranoid, OMA, OrthoFinder, orthoMCL
ENSDARG00000002377	767710	ZDB-GENE-060929-864	mief2	Human	125170	17920	MIEF2	7	7.3	high	Yes	Yes	Compara, eggNOG, OrthoFinder, Panther, Phylome, TreeFam, ZFIN
ENSDARG00000002385	403064	ZDB-GENE-040809-1	atm	Human	472	795	ATM	13	13.29	high	Yes	Yes	Compara, eggNOG, Hieranoid, Homologene, OMA, OrthoDB, OrthoFinder, OrthoInspector, orthoMCL, Panther, Phylome, RoundUp, ZFIN
ENSDARG00000002391	450051	ZDB-GENE-041010-173	tlcd1	Human	116238	25177	TLCD1	11	11.21	high	Yes	Yes	Compara, eggNOG, Hieranoid, Homologene, OMA, OrthoFinder, orthoMCL, Panther, Phylome, TreeFam, ZFIN
ENSDARG00000002394	100415794	ZDB-GENE-091118-36	ugt5d1	Human	7363	12553	UGT2B4	3	3	moderate	Yes	No	eggNOG, OrthoFinder, Panther
ENSDARG00000002394	100415794	ZDB-GENE-091118-36	ugt5d1	Human	7366	12546	UGT2B15	3	3	moderate	Yes	No	eggNOG, OrthoFinder, Panther
ENSDARG00000002394	100415794	ZDB-GENE-091118-36	ugt5d1	Human	54490	13479	UGT2B28	3	3	moderate	Yes	No	eggNOG, OrthoFinder, Panther
ENSDARG00000002394	100415794	ZDB-GENE-091118-36	ugt5d1	Human	7367	12547	UGT2B17	3	3	moderate	Yes	No	eggNOG, OrthoFinder, Panther
ENSDARG00000002394	100415794	ZDB-GENE-091118-36	ugt5d1	Human	10720	12545	UGT2B11	3	3	moderate	Yes	No	eggNOG, OrthoFinder, Panther
ENSDARG00000002394	100415794	ZDB-GENE-091118-36	ugt5d1	Human	79799	28528	UGT2A3	3	3	moderate	Yes	No	eggNOG, OrthoFinder, Panther
ENSDARG00000002394	100415794	ZDB-GENE-091118-36	ugt5d1	Human	7364	12554	UGT2B7	3	3	moderate	Yes	No	eggNOG, OrthoFinder, Panther
ENSDARG00000002394	100415794	ZDB-GENE-091118-36	ugt5d1	Human	7365	12544	UGT2B10	3	3	moderate	Yes	No	eggNOG, OrthoFinder, Panther
ENSDARG00000002394	100415794	ZDB-GENE-091118-36	ugt5d1	Human	7368	12555	UGT8	3	2.86	moderate	Yes	No	eggNOG, OrthoFinder, TreeFam
ENSDARG00000002396	402986	ZDB-GENE-040617-2	cry-dash	Human	1408	2385	CRY2	1	0.9	low	Yes	No	eggNOG
ENSDARG00000002396	402986	ZDB-GENE-040617-2	cry-dash	Human	1407	2384	CRY1	1	0.9	low	Yes	No	eggNOG
ENSDARG00000002401	678540	ZDB-GENE-060421-6479	gale	Human	2582	4116	GALE	15	15.3	high	Yes	Yes	Compara, eggNOG, Hieranoid, Homologene, Inparanoid, OMA, OrthoDB, OrthoFinder, OrthoInspector, orthoMCL, Panther, Phylome, RoundUp, TreeFam, ZFIN
ENSDARG00000002402	324323	ZDB-GENE-030131-3043	ercc3	Human	2071	3435	ERCC3	13	13.39	high	Yes	Yes	Compara, Hieranoid, Homologene, Inparanoid, OMA, OrthoFinder, OrthoInspector, orthoMCL, Panther, Phylome, RoundUp, TreeFam, ZFIN
ENSDARG00000002403	567446	ZDB-GENE-030827-5	nusap1	Human	51203	18538	NUSAP1	15	15.3	high	Yes	Yes	Compara, eggNOG, Hieranoid, Homologene, Inparanoid, OMA, OrthoDB, OrthoFinder, OrthoInspector, orthoMCL, Panther, Phylome, RoundUp, TreeFam, ZFIN
ENSDARG00000002405	561694	ZDB-GENE-060531-39	si:ch211-225b11.1	Human	6529	11042	SLC6A1	1	1	low	Yes	No	OrthoFinder
ENSDARG00000002405	561694	ZDB-GENE-060531-39	si:ch211-225b11.1	Human	6538	11044	SLC6A11	1	1	low	Yes	No	OrthoFinder
ENSDARG00000002405	561694	ZDB-GENE-060531-39	si:ch211-225b11.1	Human	6539	11045	SLC6A12	1	1	low	Yes	No	OrthoFinder
ENSDARG00000002405	561694	ZDB-GENE-060531-39	si:ch211-225b11.1	Human	6533	11052	SLC6A6	1	1	low	Yes	No	OrthoFinder
ENSDARG00000002405	561694	ZDB-GENE-060531-39	si:ch211-225b11.1	Human	6540	11046	SLC6A13	1	1	low	Yes	No	OrthoFinder
ENSDARG00000002406	393368	ZDB-GENE-040426-1218	zmynd10	Human	51364	19412	ZMYND10	15	15.3	high	Yes	Yes	Compara, eggNOG, Hieranoid, Homologene, Inparanoid, OMA, OrthoDB, OrthoFinder, OrthoInspector, orthoMCL, Panther, Phylome, RoundUp, TreeFam, ZFIN
ENSDARG00000002411	571344	ZDB-GENE-041210-266	crtc1b	Human	23373	16062	CRTC1	8	8.33	moderate	Yes	No	Compara, eggNOG, OMA, orthoMCL, Panther, RoundUp, TreeFam, ZFIN
ENSDARG00000002445	323473	ZDB-GENE-030131-2193	prdm1a	Human	639	9346	PRDM1	15	15.3	high	Yes	Yes	Compara, eggNOG, Hieranoid, Homologene, Inparanoid, OMA, OrthoDB, OrthoFinder, OrthoInspector, orthoMCL, Panther, Phylome, RoundUp, TreeFam, ZFIN
ENSDARG00000002463	101883655	ZDB-GENE-100514-3	arhgef37	Human	389337	34430	ARHGEF37	15	15.3	high	Yes	Yes	Compara, eggNOG, Hieranoid, Homologene, Inparanoid, OMA, OrthoDB, OrthoFinder, OrthoInspector, orthoMCL, Panther, Phylome, RoundUp, TreeFam, ZFIN
ENSDARG00000002467	334665	ZDB-GENE-030131-6605	rdh14b	Human	57665	19979	RDH14	12	12.27	high	Yes	Yes	Compara, eggNOG, Hieranoid, Inparanoid, OMA, OrthoDB, OrthoFinder, orthoMCL, Panther, Phylome, TreeFam, ZFIN
ENSDARG00000002479	100005291	ZDB-GENE-060531-56	ercc6l	Human	54821	20794	ERCC6L	13	13.29	high	Yes	Yes	Compara, eggNOG, Hieranoid, Inparanoid, OrthoDB, OrthoFinder, OrthoInspector, orthoMCL, Panther, Phylome, RoundUp, TreeFam, ZFIN
[truncated: 33,182 more rows]

## Sheet: RNA Filtered human ortholg yes
gene_id	gene_name	HUMAN GENE	EvR-2	EvR-3	EvR-4	EvR-6	EvR-7	EvR-8	test_id	gene	locus	sample_1	sample_2	status	value_1	value_2	log2(fold_change)	test_stat	p_value	q_value	significant
[truncated: 20,558 more rows]

[truncated: 6 more sheets: GSEA input, IPA INPUT, SATB2-Bound TSS+gene Body+-3kb, Bound DIOPT prediction, Humanized SATB2 Bound list, Overlap RNA with SATB2 ChIp-seq]
