# Supplementary material for: SATB2 induction of a neural crest mesenchyme-like program drives melanoma invasion and drug resistance
Source: eLife. 2021 Feb 2;10:e64370. doi: 10.7554/eLife.64370 (PMC7880683; doi:10.7554/eLife.64370)
Supplement: Supplementary file 3. — (Sheet 2) Neural-crest-associated genes. (Sheet 3) SATB2/neural-crest-associated genes. (Sheet 4) Human predicted orthologs (DIOPT) of SATB2-Bound genes (TSS+ gene body +/- 3 kb). [file elife-64370-supp3.xlsx]

## Sheet: SATB2 bound and associated
AACS
AATF
ABAT
ABCA4
ABCC4
ABCC5
ABCC9
ABCD1
ABCD3
ABCF1
ABCG2
ABCG5
ABCG8
ABHD12
ABHD12B
ABHD17B
ABHD2
ABI1
ABL2
ABLIM1
ACACA
ACAD11
ACAD9
ACADVL
ACAP3
ACBD5
ACBD6
ACCS
ACER1
ACER3
ACKR3
ACOT13
ACOT7
ACOT9
ACOX3
ACSL1
ACSL3
ACSL3
ACSL4
ACSS1
ACTA1
ACTC1
ACTN1
ACTN2
ACTR2
ACTR3
ACTR3B
ACVR1B
ACVR2A
ACVR2B
ACVRL1
ADAM10
ADAM17
ADAM8
ADAM9
ADAMTS15
ADAT3
ADCK1
ADCY2
ADCY5
ADCY8
ADD1
ADD3
ADGRL4
ADGRV1
ADH4
ADK
ADRBK2
ADSSL1
ADTRP
AEBP2
AES
AFTPH
AGAP2
AGBL4
AGFG1
AGL
AGO2
AGO4
AGPAT5
AGPS
AGRN
AGT
AGTRAP
AHR
AIF1L
AIFM1
AIFM2
AIRE
AK1
AKR1B1
AKT2
AKT3
ALCAM
ALDH9A1
ALDOC
ALG14
ALG5
ALX1
AMER2
AMMECR1
AMOTL2
AMY1C
AMY2A
AMY2B
ANGPT1
ANGPT1
ANGPT2
ANK2
ANKDD1A
ANKH
ANKHD1-EIF4EBP3
ANKIB1
ANKLE1
ANKLE2
ANKRD10
ANKRD12
ANKRD13A
ANKRD16
ANKRD50
ANKRD52
ANKRD65
ANKS1B
ANO10
ANO5
ANPEP
ANTXR2
ANXA1
ANXA1
ANXA11
ANXA13
ANXA4
AP1B1
AP1M1
AP1S3
AP2B1
AP3M1
AP3M2
AP4B1
AP5S1
APC
APCS
APCS
APEX1
APLP2
APOA4
APOD
APOOL
APP
AQP12A
AQP12B
AQP3
AQR
AR
ARAF
ARF1
ARF3
ARG2
ARGLU1
ARHGAP1
ARHGAP12
ARHGAP15
ARHGAP25
ARHGAP36
ARHGAP39
ARHGAP6
ARHGAP6
ARHGEF1
ARHGEF11
ARHGEF2
ARHGEF39
ARID2
ARID3C
ARID5B
ARIH1
ARL13A
ARL15
ARL4A
ARL6IP1
ARMC1
ARMC8
ARNT2
ARPC2
ARPC5L
ARPIN
ARRB2
ARRB2
ARRDC1
ARRDC1
ARRDC3
ARSA
ARSK
ARV1
ARVCF
AS3MT
ASAP2
ASB4
ASCC2
ASIC2
ASIC2
ASIC4
ASMT
ASNS
ASRGL1
ASRGL1
ASS1
ATAT1
ATE1
ATF1
ATF5
ATF7
ATG16L1
ATG5
ATL1
ATP11A
ATP11B
ATP11C
ATP13A2
ATP1A3
ATP1A3
ATP1B2
ATP2B3
ATP5H
ATP6AP1
ATP6V0A1
ATP6V0A2
ATP6V0C
ATP6V1A
ATP6V1H
ATP8A1
ATP8A1
ATP8A2
ATP8B1
ATP8B2
ATP8B3
ATP8B4
ATP9B
ATRN
ATRX
ATXN1
ATXN1
ATXN2
ATXN2L
AURKA
AZIN1
B3GALNT2
B3GAT2
B4GALT1
B4GALT2
B4GALT4
B4GALT5
BAG3
BAG5
BAMBI
BANP
BASP1
BAZ2A
BBOX1
BCAR1
BCAR3
BCAS3
BCKDHB
BCKDK
BCL11A
BCL11A
BCL2
BCL2A1
BCL2L10
BCL2L11
BCL6
BCL7A
BCL9L
BCO2
BCOR
BCR
BDH1
BET1
BFSP2
BGN
BHLHE40
BIN1
BIN2
BIN3
BIRC7
BMP1
BMP2K
BMP7
BMP8B
BMPR1A
BMPR1A
BMPR2
BMPR2
BNC2
BNIP2
BNIP3
BNIP3
BNIP3L
BOC
BOLA2
BOP1
BORCS7
BRD2
BRDT
BRE
BRF1
BRF1
BRINP3
BRMS1
BSDC1
BTD
BTG1
BTG4
BZW1
BZW2
C10orf11
C10orf54
C11orf54
C14orf166
C14orf169
C15orf59
C16orf46
C18orf21
C19orf47
C1orf106
C1orf35
C1QBP
C21orf91
C2CD2L
C2orf76
C3orf58
C3orf58
C3orf67
C3orf70
C4orf22
C5orf51
C6
C6orf106
C6orf62
C8orf34
C8orf44-SGK3
C9
C9orf171
C9orf3
C9orf85
C9orf9
CA13
CAB39
CAB39L
CACNA1B
CACNA1D
CACNA1S
CACNA2D1
CACNA2D2
CACNB3
CACNB4
CACNG2
CACNG2
CACNG7
CACNG8
CADM1
CADM2
CALCOCO1
CALM1
CALM1
CAMK1G
CAMK2B
CAMK2G
CAMKK1
CAMSAP1
CAMSAP2
CANX
CAP2
CAPG
CAPN5
CAPZB
CARKD
CASD1
CASK
CASQ1
CASR
CAST
CAV2
CBFB
CBL
CBLN2
CBS
CBWD1
CBX3
CCDC102A
CCDC115
CCDC117
CCDC127
CCDC153
CCDC167
CCDC176
CCDC28B
CCDC34
CCDC40
CCDC47
CCDC50
CCDC58
CCDC6
CCDC64B
CCDC80
CCDC85A
CCDC85B
CCNB1
CCND2
CCNH
CCNL1
CCNT1
CCSAP
CCT6A
CCT7
CCZ1
CCZ1B
CD207
CD226
CD244
CD276
CD2AP
CD40
CD53
CD81
CD99
CD99L2
CDA
CDC42BPB
CDC42EP3
CDC42SE2
CDC5L
CDCA2
CDH1
CDH23
CDH4
CDH6
CDH7
CDK15
CDK17
CDK5
CDK5RAP2
CDK6
CDK8
CDKAL1
CDON
CDR2L
CDS2
CEBPD
CELF1
CELF2
CELF3
CELF4
CELF5
CEP112
CEP89
CERK
CERKL
CERS2
CFAP53
CFH
CFLAR
CHCHD6
CHD1L
CHD4
CHIA
CHL1
CHMP4C
CHMP6
CHN1
CHP1
CHRD
CHRFAM7A
CHRNA5
CHRNA7
CHRNB1
CHRND
CHRNE
CHST11
CHSY1
CHSY3
CHTOP
CITED1
CKAP2L
CKM
CLASP1
CLASP2
CLCN1
CLCN7
CLDN11
CLDN17
CLDN19
CLDN3
CLDN4
CLDN6
CLDN7
CLDN7
CLDN8
CLDN8
CLDN9
CLEC18A
CLEC18B
CLEC18C
CLEC4A
CLEC4C
CLEC4D
CLEC4E
CLEC4E
CLEC4E
CLEC4E
CLEC4G
CLEC6A
CLIC2
CLIC4
CLINT1
CLNS1A
CLPTM1
CLPTM1L
CLSTN1
CLSTN2
CLTC
CLUAP1
CLUL1
CLYBL
CMSS1
CMTM4
CMTM6
CNBP
CNDP2
CNKSR1
CNN3
CNN3
CNNM2
CNOT3
CNOT6
CNOT6L
CNPY1
CNPY2
CNTFR
CNTN1
CNTN4
CNTN5
CNTNAP2
CNTNAP2
COG3
COG6
COG7
COL11A1
COL11A1
COL11A2
COL18A1
COL1A2
COL27A1
COL27A1
COL5A3
COL8A1
COL8A2
COL9A1
COL9A1
COL9A2
COL9A3
COLEC12
COLGALT1
COLGALT2
COPB1
COPS4
COPS5
COQ5
CORO1A
CORO1B
CORO1C
CORO1C
CORO6
CORO7
COX6A2
COX6C
CPEB3
CPEB4
CPEB4
CPLX2
CPLX3
CPM
CPNE2
CPNE3
CPNE5
CPO
CPO
CPPED1
CPSF1
CRABP2
CRACR2B
CRBN
CRCP
CRHR2
CRLF3
CRP
CRP
CRTC1
CRY1
CRY1
CRY2
CRYAB
CRYBA4
CRYGA
CRYGA
CRYGB
CRYGB
CRYGC
CRYGC
CRYGD
CRYGD
CRYGN
CS
CSNK1E
CSNK2A1
CSPG5
CSRP1
CSRP2
CSTF1
CTAGE1
CTAGE5
CTBP1
CTBP2
CTBS
CTCF
CTDP1
CTDSPL
CTDSPL
CTGF
CTHRC1
CTNNA1
CTNNA1
CTNNA2
CTNNAL1
CTNNB1
CTNNBIP1
CTSB
CTSD
CTSH
CTSS
CTSV
CTSZ
CTTNBP2NL
CUL1
CUL3
CUL4A
CWC15
CWC22
CWC27
CXADR
CXCR4
CXXC1
CYB561A3
CYBA
CYFIP1
CYHR1
CYP17A1
CYP26B1
CYP2B6
CYP2C18
CYP2C19
CYP2C8
CYP2C9
CYP2J2
CYP2U1
CYP2W1
CYP46A1
CYP46A1
CYP4F2
CYR61
CYTH1
CYTH1
CYYR1
D2HGDH
DAAM1
DAB1
DAB2
DAB2IP
DACH1
DACH1
DACH2
DACH2
DACT2
DAP
DAPK1
DAPK2
DAPL1
DARS
DAXX
DBI
DBP
DCAF10
DCAF6
DCBLD2
DCC
DCLK2
DCPS
DCT
DCTN2
DCTN4
DCUN1D3
DDAH2
DDOST
DDX18
DDX19A
DDX19B
DDX23
DDX39B
DDX39B
DDX56
DEF8
DEGS1
DENND2D
DENR
DERL2
DES
DESI1
DFFA
DGAT1
DGCR8
DGKA
DHRS11
DHRS11
DHRS13
DHRS3
DHRS9
DHRSX
DHX15
DIAPH3
DIEXF
DIO3
DIP2B
DIRC2
DISC1
DISP2
DLG1
DLG2
DLG4
DLG5
DLGAP3
DLL1
DLX1
DLX2
DLX5
DLX6
DMRT2
DMRT3
DMTN
DMXL2
DNAJA3
DNAJB12
DNAJB12
DNAJB13
DNAJB6
DNAJC11
DNAJC11
DNAJC3
DNM1
DNM3
DNMT3B
DNTT
DOCK1
DOCK11
DOCK5
DOK6
DPAGT1
DPF2
DPM2
DPM3
DPP6
DPYD
DPYD
DPYSL2
DR1
DRAP1
DRD3
DRD4
DRGX
DROSHA
DSCAM
DSCR3
DSTYK
DTNB
DTNBP1
DTX2
DTX3
DUPD1
DUSP18
DUSP21
DUSP22
DVL1
DVL2
DYNC1H1
DYSF
DZIP1L
E2F7
ECD
ECE1
ECHDC2
ECI2
EDN1
EDN2
EEF1A1
EEF1A1
EEF1A2
EEF1A2
EEF1A2
EEF1B2
EEF2K
EEPD1
EFCAB1
EFHD1
EFNA1
EFNA3
EFNB1
EFNB2
EFNB3
EFR3A
EGF
EGFR
EGLN1
EHD1
EHD1
EHD2
EHMT1
EHMT1
EHMT2
EIF1
EIF2B3
EIF2B5
EIF2S1
EIF3A
EIF3E
EIF3H
EIF3I
EIF4A1
EIF4A2
EIF4B
EIF4E
EIF4E2
EIF4E3
EIF4EBP2
EIF4G2
EIF5
EIF5A
EIF5A2
ELAC1
ELF1
ELMO1
ELMO2
ELOVL1
ELOVL3
ELOVL5
ELOVL6
ELOVL6
ELP2
ELP4
EMC2
EMILIN1
EML1
EML2
EMP2
EMP3
EMX1
EN2
ENAH
ENDOU
ENGASE
ENO1
ENO2
ENO4
ENOPH1
ENSA
ENTPD6
EPAS1
EPB41L3
EPB41L3
EPB41L4A
EPG5
EPHA4
EPHA4
EPHB4
EPHB4
EPO
ERBB2
ERBB2IP
ERBB3
ERCC3
ERCC8
ERF
ERLIN2
ESAM
ESRRG
ETFA
ETNK2
ETV5
ETV5
EVA1A
EVA1B
EVL
EWSR1
EXD1
EXOC3L4
EXOC4
EXOC5
EXOC6B
EXOSC4
EXOSC7
EXT1
EXT2
EXTL1
EYA1
EYA3
EYA4
EZR
F11R
F11R
F5
FAAH
FAM102A
FAM102B
FAM107B
FAM110B
FAM117B
FAM120B
FAM126A
FAM131C
FAM135A
FAM13B
FAM155B
FAM160A2
FAM160B1
FAM162A
FAM168A
FAM168B
FAM172A
FAM175B
FAM184B
FAM19A4
FAM19A5
FAM204A
FAM20B
FAM212A
FAM219A
FAM222A
FAM222B
FAM35A
FAM49A
FAM49A
FAM49A
FAM49B
FAM50A
FAM63A
FAM65B
FAM69C
FAM72A
FAM76B
FAM83H
FAM84B
FAM92A1
FANCL
FAR1
FAR1
FARS2
FASLG
FASTK
FAT1
FBLN1
FBLN5
FBXL3
FBXL5
FBXL7
FBXO6
FBXO6
FBXO9
FBXW4
FCER1A
FCER2
FCER2
FCER2
FCHO2
FDX1
FERMT2
FETUB
FGF11
FGF2
FGFR1
FGFR2
FGFR3
FGFR4
FGFRL1
FGR
FH
FHL1
FHL3
FIBCD1
FIBP
FICD
FIGF
FIGN
FIGNL2
FILIP1L
FLI1
FLOT1
FLOT2
FLT1
FNBP1
FNBP1L
FNDC3B
FNDC5
FNIP2
FOXB1
FOXN3
FOXN4
FOXO6
FOXP1
FOXP1
FOXP2
FOXP4
FRAS1
FREM2
FREM2
FRMD1
FRMD4A
FRYL
FRZB
FSCN1
FSTL1
FSTL4
FUBP3
FUCA1
FUCA1
FUCA2
FUOM
FURIN
FXR2
FXYD6-FXYD2
FYN
FZD3
FZD3
FZD6
FZD7
FZD8
G3BP2
GABARAP
GABBR2
GABPB1
GAD1
GAD2
GADD45A
GAL3ST1
GALC
GALNT14
GALNT2
GAPVD1
GARNL3
GAS1
GATA2
GATA5
GATAD1
GATAD2B
GATSL2
GBGT1
GC
GCLC
GDA
GDAP1
GDF6
GDI2
GFAP
GFAP
GFM2
GFOD1
GFRA2
GFRA4
GGCT
GGPS1
GHITM
GHR
GHRHR
GIGYF2
GIN1
GIT2
GIT2
GJA1
GJA10
GJA3
GJA4
GJA4
GJA5
GJA5
GJA5
GJA8
GJA9
GJB1
GJB1
GJB2
GJB3
GJB4
GJB4
GJB5
GJB6
GJB7
GJC1
GJC2
GJC3
GJD2
GJD2
GJD4
GK5
GLCCI1
GLCE
GLDC
GLG1
GLI2
GLI3
GLIS3
GLMP
GLRA4
GLRB
GLTP
GLUD1
GLYCTK
GM2A
GMDS
GMEB1
GMFB
GMPS
GNA11
GNA11
GNA12
GNA13
GNAI1
GNAI2
GNAI2
GNAI3
GNAL
GNAO1
GNAO1
GNB1
GNB1
GNB1L
GNB2
GNG10
GNG10
GNG11
GNG12
GNG12
GNG13
GNG2
GNG3
GNG4
GNG5
GNG7
GNG7
GNG8
GNGT1
GNPTG
GOLGA2
GOLGA3
GOLPH3L
GORASP2
GOT1
GPAT2
GPAT3
GPC1
GPC3
GPC4
GPC5
GPC6
GPC6
GPD1
GPD1L
GPD2
GPHN
GPHN
GPM6A
GPR107
GPR12
GPR143
GPR146
GPR157
GPR161
GPR183
GPR183
GPR3
GPR50
GPR6
GPR84
GPS2
GPSM2
GPT
GRASP
GRB10
GRHL1
GRHL2
GRIA1
GRIA1
GRIA3
GRID2
GRIN1
GRM2
GRM4
GRM6
GRM8
GRN
GRSF1
GSC
GSE1
GSK3A
GSK3B
GSN
GSTCD
GTDC1
GTF2H2
GTF2H2C_2
GTF2H4
GUCY1B3
GUCY2D
GUK1
GULP1
GXYLT2
GYG1
GYLTL1B
GYPC
H2AFV
H2AFV
H3F3A
HACD2
HAND2
HAS3
HAT1
HAUS4
HAX1
HBS1L
HDAC1
HDAC3
HDAC4
HDAC8
HDC
HDLBP
HEATR5A
HEBP1
HEBP2
HECTD1
HEG1
HELZ
HEPACAM2
HES1
HES4
HES4
HES5
HES5
HEXA
HGH1
HGSNAT
HHAT
HHATL
HHATL
HHIP
HIBADH
HIBCH
HIGD1A
HIP1
HIPK2
HIPK3
HIST1H1B
HIST1H4A
HIST1H4B
HIST1H4C
HIST1H4D
HIST1H4E
HIST1H4F
HIST1H4H
HIST1H4I
HIST1H4J
HIST1H4K
HIST1H4L
HIST2H4A
HIST2H4B
HIST4H4
HIVEP2
HK1
HK2
HKDC1
HLA-A
HLA-B
HLA-C
HMBOX1
HMGA1
HMGCR
HMGN3
HMGN4
HN1
HN1L
HNF1B
HNF4G
HNRNPA1
HNRNPA1
HNRNPA1L2
HNRNPA3
HNRNPAB
HNRNPDL
HNRNPK
HOOK2
HOXA13
HOXA3
HOXA4
HOXA7
HOXB7
HOXC10
HOXC5
HOXC8
HOXD1
HOXD10
HOXD11
HOXD12
HOXD13
HOXD3
HOXD4
HOXD9
HPCA
HPCA
HPCAL1
HPCAL4
HPD
HPS1
HPS3
HPS4
HS2ST1
HS3ST1
HS3ST5
HS6ST1
HS6ST1
HS6ST3
HSD11B2
HSD17B2
HSD17B6
HSD17B7
HSF1
HSH2D
HSPA12A
HSPA4
HSPB1
HSPB2
HSPB3
HSPB8
HSPE1
HTRA1
HTT
Human Symbol
IAH1
ICA1L
IDE
IER5L
IFI44L
IFIH1
IFNA1
IFNA13
IFNA14
IFNA17
IFNA2
IFNA21
IFNA4
IFNA6
IFNA7
IFNA8
IFNAR1
IFNB1
IFNE
IFT172
IFT27
IFT57
IGF1R
IGF1R
IGF2
IGF2BP3
IGF2R
IGFBP3
IGFBP6
IGFBP7
IGFN1
IGSF11
IGSF21
IGSF21
IGSF22
IGSF3
IKZF4
IL11RA
IL12RB2
IL12RB2
IL17RD
IL1B
IL1RAPL1
IL1RAPL1
IL1RAPL2
IL23R
ILF2
ILF3
IMP3
IMPACT
INA
INA
ING4
ING5
INHBB
INPP5F
INPP5K
INSL5
INSR
INSR
INTS12
INTS2
INTS3
INTS8
INVS
INVS
IP6K2
IPO7
IPO8
IQCA1
IQCB1
IQCB1
IQCH
IQGAP2
IRF2BP2
IRF2BPL
IRF9
IRX4
ISCU
ISM1
IST1
ITGA5
ITGA6
ITGA8
ITGAV
ITPKC
ITPRIP
ITSN2
JAG1
JAG2
JAK2
JAM3
JARID2
JAZF1
JMY
JPH1
JUP
KANK1
KANK2
KANSL2
KAT2B
KAT5
KAT6A
KAT8
KAZN
KCNAB1
KCNAB2
KCNC1
KCNC3
KCND2
KCND3
KCNG1
KCNH1
KCNH2
KCNH5
KCNIP1
KCNIP1
KCNIP2
KCNIP3
KCNIP3
KCNIP4
KCNJ13
KCNK2
KCNK5
KCNMA1
KCNN1
KCNQ1
KCTD12
KCTD15
KCTD6
KDM1A
KDM4B
KDM5B
KDM6B
KEAP1
KEAP1
KHDRBS1
KHDRBS1
KHDRBS2
KIAA0586
KIAA1109
KIAA1147
KIAA1211L
KIAA1324L
KIAA1407
KIAA1468
KIAA1715
KIAA1755
KIF11
KIF1B
KIF1BP
KIF20A
KIF2A
KIF2C
KIF3B
KIF4A
KIFAP3
KIRREL
KISS1R
KLC1
KLC4
KLF11
KLF12
KLF13
KLF15
KLF6
KLF7
KLF8
KLF9
KLHL15
KLHL21
KLHL24
KLHL31
KLHL40
KLHL9
KMO
KPTN
KREMEN1
KRIT1
KRT10
KRT12
KRT13
KRT14
KRT15
KRT16
KRT17
KRT18
KRT18
KRT19
KRT20
KRT23
KRT24
KRT25
KRT26
KRT27
KRT28
KRT32
KRT35
KRT36
KRT39
KRT40
KRT78
KRT8
KRT80
KRT82
KRT9
KSR2
KTN1
L1CAM
L1CAM
LAMA1
LAMA2
LAMA5
LAMB1
LAMB2
LAMC1
LAPTM4B
LARP4B
LAS1L
LASP1
LATS2
LCK
LCN15
LDAH
LDB1
LDB2
LDB3
LDLRAD4
LDLRAP1
LDLRAP1
LEF1
LETM1
LFNG
LGALS9
LGALSL
LHCGR
LHFPL2
LHFPL2
LHX1
LHX3
LHX9
LIFR
LIG3
LIMA1
LIMCH1
LIMS1
LIN28A
LIN54
LINGO2
LLGL1
LMBR1L
LMBRD1
LMBRD2
LMNA
LMNA
LMO2
LMO4
LMO7
LMX1A
LMX1B
LNPEP
LNX1
LOC100129924
LOC100505585
LONP2
LOXL1
LOXL2
LOXL3
LOXL3
LPAR1
LPCAT1
LPIN3
LPP
LPPR1
LPPR3
LPPR5
LPPR5
LRFN1
LRIG3
LRP12
LRPPRC
LRRC1
LRRC30
LRRC3B
LRRC57
LRRC9
LRRFIP2
LRSAM1
LSM14A
LTA
LTB
LTBP3
LTK
LUC7L
LURAP1
LUZP2
LYPLA2
LZTR1
LZTS2
M1AP
MACROD1
MACROD2
MAFB
MAFK
MAGI1
MAGI2
MAK
MAK16
MAL
MAN1A2
MAN1B1
MAN2A1
MANEAL
MAOB
MAP2K1
MAP2K5
MAP3K5
MAP4K5
MAP7D1
MAPK1
MAPK11
MAPK12
MAPK14
MAPK8
MAPK8IP3
MAPRE1
MAPRE2
MAPRE3
MARCH4
MARCKSL1
MARCKSL1
MARK3
MARVELD1
MARVELD3
MASTL
MAT1A
MATN1
MATN3
MATR3
MAVS
MBD2
MBLAC2
MBNL1
MBNL3
MBTPS1
MC1R
MCAM
MCL1
MCU
MDH1B
MDM2
MDM4
ME2
ME3
MEAF6
MED10
MED13
MED18
MED23
MED26
MED30
MED30
MEF2A
MEF2C
MEF2C
MEFV
MEFV
MEIS1
MEIS2
METAP1
METTL16
METTL25
MFN2
MFSD10
MFSD12
MFSD2A
MFSD2A
MFSD5
MGAT2
MGAT4B
MGAT5
MGLL
MIA
MICAL2
MICU1
MICU2
MINK1
MINOS1
MIPOL1
MIR10B
MIR125B1
MIR150
MIR17
MIR193A
MIR196A2
MIR199B
MIR30C2
MIR365B
MIR92A1
MIR92A2
MIS12
MITF
MKLN1
MKX
MLLT11
MLPH
MLYCD
MMP14
MMRN2
MNAT1
MOB1A
MOB1B
MOB2
MOB2
MOB4
MOCOS
MOCS3
MOGAT2
MORN2
MOSPD2
MOV10
MPC1
MPDU1
MPL
MPND
MPP6
MPP7
MPPED2
MREG
MRGBP
MRPL14
MRPL23
MRPL24
MRPL53
MRPS21
MRPS35
MRPS5
MRPS9
MRRF
MSH3
MSI2
MSI2
MSL2
MSN
MSRA
MSRB3
MSX2
MT1A
MT1H
MT2A
MTA2
MTDH
MTFR1
MTFR1L
MTHFD2
MTMR1
MTMR3
MTMR6
MTMR9
MTNR1A
MTNR1A
MTNR1B
MTOR
MTSS1
MTX1
MUL1
MVB12B
MVK
MXRA8
MYB
MYBBP1A
MYBBP1A
MYBPH
MYBPH
MYC
MYC
MYEOV2
MYL10
MYL6
MYL7
MYLIP
MYLK2
MYNN
MYO1C
MYO1G
MYO3A
MYO5B
MYO6
MYO7A
NAA10
NAA38
NAB2
NACA
NADSYN1
NAIF1
NAMPT
NANOGP1
NANP
NANS
NAP1L4
NAPB
NAPB
NAPB
NAV3
NBAS
NBEA
NCALD
NCAM2
NCAPH
NCCRP1
NCK2
NCK2
NCKAP1
NCOA2
NCOA4
NCOR1
NCOR2
NCS1
NDEL1
NDFIP1
NDFIP1
NDNL2
NDOR1
NDRG1
NDRG2
NDRG3
NDUFA12
NDUFA4
NDUFB4
NDUFS1
NDUFS3
NDUFS5
NDUFV1
NECAB1
NECAP1
NEDD9
NEFM
NEGR1
NEK7
NELFB
NELFCD
NEO1
NEURL1B
NEUROD6
NEUROG3
NF2
NFATC1
NFE2
NFE2L2
NFIX
NFKB2
NFYC
NGB
NGLY1
NHEJ1
NIPBL
NIPBL
NIPBL
NKAIN1
NKAIN4
NKD1
NKD2
NKX2-3
NKX3-1
NKX6-2
NLGN1
NLGN2
NLK
NME7
NME8
NMNAT1
NOC2L
NOL10
NOL4L
NOL6
NONO
NOP14
NOP58
NOS1
NOTCH1
NOTCH1
NOVA1
NPC1
NPEPL1
NPR1
NPTN
NPTX1
NPVF
NPY
NPY1R
NR1D2
NR2F1
NR2F6
NR3C1
NR3C2
NR6A1
NRAP
NRG1
NRG2
NRM
NRP1
NRP2
NRP2
NRXN2
NRXN3
NRXN3
NSFL1C
NSMCE4A
NSRP1
NSUN2
NT5C1A
NT5C1B
NT5C2
NT5C2
NTMT1
NTN1
NTRK2
NTRK2
NTRK3
NUBP2
NUBPL
NUCKS1
NUDCD1
NUDT10
NUDT11
NUDT14
NUDT2
NUDT22
NUDT3
NUDT3
NUDT4
NUFIP2
NUGGC
NUGGC
NUMB
NUP107
NUP155
NUP160
NUP205
NUP58
NUP93
NUPL2
NXF1
NXN
NXPE3
NXPH1
OCLN
OCLN
OCRL
ODC1
[truncated: 1,583 more rows]

## Sheet: SATB2- and NC-associated genes
ABCC4
ACVR2A
ACVR2B
ALCAM
ANKRD50
BHLHE40
BMPR1A
C10orf11
CDH6
CDON
CNBP
CNDP2
CNN3
COL11A1
CTSB
CTSH
CXCR4
DACH1
DCT
DEGS1
DISC1
DLG1
DLL1
DLX2
DPYSL2
DTNBP1
EDN1
EFNB1
EFNB2
EIF2S1
ERBB2
ERBB3
FGFR1
FGFRL1
FRZB
FZD3
FZD7
GDF6
GMPS
GPD1
GPR143
GSC
HAND2
HES1
HES4
HHIP
HOXA3
IGFBP3
IL17RD
KAT6A
KCTD15
KRT18
L1CAM
LAMA5
LATS2
LEF1
LMO4
LOXL3
MAFB
MARVELD1
MEF2A
MEF2C
MEIS1
MITF
MOCOS
MREG
MSX2
MYC
NRG1
NRG2
NRP1
NRP2
OCRL
PAH
PAX3
PAX7
PBX1
PCDH10
PCNA
PEPD
PLCB3
PMEL
PNP
POU3F3
PRDX1
PTTG1IP
RAB7A
RARA
RARG
RDH10
RET
RNF41
RTKN
RUNX2
RXRA
RXRG
SDC4
SEMA3F
SFRP1
SFRP5
SLC22A7
SLC39A1
SLC4A2
SLMAP
SMAD4
SMARCA4
SNAI1
SNAI2
SOX10
SOX4
TES
TFAP2A
TFAP2C
TFAP2E
TNC
TRAF4
TWIST1
TWIST2
UBE2I
VENTX
VGLL2
WNT1
WNT11
WNT5B
WTIP
ZEB2
ZFP36L1

## Sheet: NC-associated genes
ABCC4
ACBD7
ACVR1
ACVR2A
ACVR2B
ALCAM
ALDH16A1
ALDH1A2
ALDH2
ALK
AMDHD2
ANKRD50
AOX1
AQP7
ASPM
ATIC
ATOH8
ATP1B3
BARX1
BHLHE40
BHLHE41
BMP2
BMP4
BMPER
BMPR1A
BTBD6
C10orf11
C10orf140
C7orf23
CCDC136
CCND1
CD200
CDH2
CDH6
CDON
CFL1
CFL2
CHD7
CHGA
CHRNA4
CITED2
CITED4
CNBP
CNDP2
CNN3
COL11A1
COL15A1
COL2A1
COL5A1
COLEC11
CRIP2
CSF1R
CTR9
CTSB
CTSC
CTSH
CXCR4
CYB5A
CYP26A1
CYP26C1
D4ADT9
DACH1
DCT
DDX21
DEGS1
DERA
DFNA5
DISC1
DLG1
DLL1
DLX2
DPYSL2
DPYSL3
DPYSL4
DPYSL5
DSTN
DTNBP1
EDN1
EDN3
EDNRA
EDNRB
EFNB1
EFNB2
EGR2
EIF2S1
ERBB2
ERBB3
ERBB4
FAM46B
FGF10
FGF15
FGF19
FGF3
FGF8
FGFR1
FGFRL1
FLNC
FLRT3
FMR1
FOXC1
FOXC2
FOXD1
FOXD2
FOXD3
FOXD4
FOXD4L1
FOXD4L2
FOXD4L4
FOXD4L5
FOXD4L6
FOXD5
FOXI2
FOXS1
FRZB
FZD3
FZD7
GADD45B
GART
GBX2
GCH1
GDF6
GDNF
GIPC2
GMPS
GPD1
GPR143
GREM1
GSC
GSTP1
HAND2
HES1
HES3
HES4
HHIP
HIF1A
HOXA1
HOXA2
HOXA3
HOXB1
HOXB2
HOXB3
HTR2B
ID2
ID3
IGFBP3
IL17RD
IMPDH1
IRX1
ISL1
ITGB1
KAT6A
KCTD15
KIT
KITLG
KLF2
KRT18
L1CAM
LAMA5
LATS2
LEF1
LEO1
LHX6
LIMD1
LMO4
LOXL3
LPL
LRAT
LRP5
LRP6
MAFB
MARVELD1
MASP1
MDK
MECOM
MED12
MEF2A
MEF2C
MEIS1
MEIS3
MITF
MOCOS
MPV17
MREG
MSX1
MSX2
MYC
NES
NEUROD4
NEUROG1
NRARP
NRG1
NRG2
NRP1
NRP2
NRTN
NUSAP1
OCRL
olfm2a
OSR1
OSR2
OVOL2
PAH
PAICS
PARP3
PAX3
PAX7
PAX9
PBX1
PBX2
PBX3
PBX4
PCDH10
PCDH18
PCNA
PDGFRA
PEPD
PHACTR4
PHLDA1
PHOX2B
PITX2
PKNOX1
PLCB3
PMEL
PNP
POLD1
POU3F3
PPAT
PRDM1
PRDM12
PRDX1
PRDX2
PTTG1IP
RAB11FIP2
RAB12
RAB32
RAB3C
RAB7A
RADIL
RALDH2
RARA
RARG
RASL11A
RAX
RDH10
RET
RGS14
RHOU
RNF213
RNF41
RPE65
RTF1
RTKN
RUNX2
RXRA
RXRG
SDC4
SEMA3C
SEMA3D
SEMA3F
SFRP1
SFRP5
SHH
SLC1A3
SLC22A7
SLC39A1
SLC40A1
SLC45A2
SLC4A1
SLC4A2
SLMAP
SMAD4
SMARCA4
SMO
SNAI1
SNAI2
SOX10
SOX11
SOX4
SOX8
SOX9
SPRY1
SQSTM1
STAT3
STMN1
SUMO1
SUMO2
SUMO3
SYNGR1
SYPL1
TBC1D5
TBX1
TBX22
TES
TFAP2A
TFAP2C
TFAP2E
TFEC
TGFB2
TGFB3
TGFBI
TNC
TRAF4
TSPAN3
TTC8
TWIST1
TWIST2
TWIST3
UBE2G2
UBE2I
VENTX
VGLL2
WNT1
WNT10A
WNT11
WNT3A
WNT5B
WNT8A
WTIP
XBP1
ZBTB10
ZEB2
ZFP36L1
ZIC1
ZIC3
ZIC4
ZIC5
ZMAT1

## Sheet: Hum. SATB2-bound iCis-target 
Human Symbol		Human unique predicted othologs (DIOPT) of SATB2-Bound genes ( TSS+ gene body +/- 3kb)
VSTM2A
STK17A
TGFBR1
NRP1
FARS2
ECI2
TUBB6
TUBB4A
TUBB2A
TUBB4B
TUBB2B
TUBB8
TUBB
TUBB1
TUBB3
FAM69C
SUGCT
GYG1
GYG2
WDR37
KLF6
KLF7
FZD8
FZD5
PLOD2
PLOD1
PLOD3
C3orf58
TRPC1
PCOLCE2
MASTL
ACBD5
ABI1
ABI2
PDSS1
GAD2
MYO3A
MYO3B
ACTR3B
ACTR3C
ACTR3
ATP6V0A1
ATP6V0A2
TCIRG1
ATP6V0A4
CAVIN1
CD180
TLR2
TLR3
TLR7
TLR9
TLR10
TLR4
TLR6
TLR1
TLR5
TLR8
TXNDC5
SLC35B3
TFAP2A
TFAP2C
TFAP2E
MAK
ICK
GNAL
TGIF1
TGIF2LX
TGIF2LY
TGIF2-C20orf24
UBA5
TOPBP1
YAE1D1
ANKH
MYC
FAM49B
CHMP4C
ACAD11
PRPF4B
GLI3
PDCD6
PEF1
REC8
NANOG
NANOGP1
NANOGP8
UBE2W
STAU2
STAU1
RDH10
HSD17B11
SDR16C5
TRPA1
EYA1
NCOA2
JPH1
JPH2
JPH3
GDAP1
GDAP1L1
DOK6
DOK4
DOK5
CD226
CBLN2
SEMA5A
SEMA5B
KLHL15
PIP4K2A
PIP4K2B
PIP5K1A
PIP5K1C
PIP4K2C
CUL1
CNTNAP2
CNTNAP1
CNTNAP4
CNTNAP3
CNTNAP3B
CNTNAP5
TPK1
RDH12
RDH11
RDH14
RDH13
KIAA1468
C8orf34
SULF1
SULF2
SLC22A13
SLC22A14
SLC22A4
SLC22A5
SLC22A7
SLC22A12
SLC22A8
SLC22A6
OXSR1
STK39
CRY2
CRY1
MAP3K3
MAP3K19
MAP3K2
PLCD1
CTDSPL
CTDNEP1
CTDSP2
CTDSP1
HHATL
HHAT
VIPR1
PTH2R
CCDC58
FAM162A
FAM162B
DRD3
CCDC191
BOC
SPICE1
CDK8
CDK19
WASF3
USP12
USP46
RPL21
PAN3
FLT1
FLT4
KDR
TAGLN3
TAGLN2
CNN3
CNN2
CNN1
TAGLN
ACOT9
DAP
ZC2HC1A
PKIA
PKIB
HNF4G
HNF4A
PIGN
COPS5
PPP1R42
SGK3
C8orf44-SGK3
POLA1
NDUFB4
BCLAF3
RPS6KA3
RPS6KA1
RPS6KA2
RPS6KB1
RPS6KB2
RPS6KA6
SGK2
RPS6KA5
RPS6KA4
PDHA1
PDHA2
YTHDF3
YTHDF1
YTHDF2
ARMC1
MTFR1
PDE7A
PDE7B
SLC51A
NUP58
MTMR6
MTMR8
MTMR7
AMER2
CHRND
SMPX
PHEX
MMEL1
MME
TFRC
KLHL24
APOD
COPS9
OTOS
MYNN
SKIL
CLDN11
RPL22L1
RPL22
EIF5A2
EIF5A
EIF5AL1
TNIK
MINK1
TNFSF10
MSL2
LARP4B
LARP4
VIPR2
EPHA4
EPHA10
EPHA3
EPHB2
EPHA2
EPHA5
EPHB6
EPHB4
EPHA1
EPHB1
EPHA7
EPHA8
EPHB3
HS6ST1
HS6ST3
HS6ST2
BCL2
PRKAG2
PRKAG1
SH3GLB1
SH3GLB2
ABCA4
COL11A1
COL11A2
COL5A1
RNPC3
PLPPR5
CPNE3
CPNE1
CPNE8
CPNE5
CPNE2
CPNE9
ABCD3
ABCD1
ABCD2
FAM168B
ALG14
PTBP2
DPYD
SNX7
NEUROD6
NEUROD1
NEUROD4
CA13
CA2
CA3
CA1
RARRES2
SLC4A2
TMEFF1
MSANTD3-TMEFF1
TMEFF2
CDK5
CDK2
CDK1
CDK3
ASIC1
ASIC2
ASIC3
ASIC5
ASIC4
CTNNA1
CTNNA2
CTNNA3
PCMTD1
PCMTD2
SNAI2
SNAI3
SNAI1
UBE2V2
TMEM189-UBE2V1
UBE2V1
CEBPD
CEBPG
MAPRE2
MAPRE1
MAPRE3
RIOK3
KCNC3
KCNC2
KCNC1
KCNC4
COG7
UBE2I
PDPK1
PDPK2P
TSR3
GNPTG
CLUAP1
RHBDL1
RHBDL2
RHBDL3
RAB11FIP3
RAB11FIP4
TMEM204
APCS
CRP
FCER1A
SLC6A16
ATP6V0C
NUBP2
NUBP1
DCUN1D3
DCUN1D5
DCUN1D2
DCUN1D1
LUC7L
LUC7L2
LUC7L3
STUB1
WDR48
SCN5A
ACVR2B
ACVR2A
CRYGN
PTPRM
LRRC30
LAMA1
LAMA2
EPB41L3
VAPA
PPP4R1
TWSG1
SERPINB6
SERPINB8
SERPINB3
SERPINB9
SERPINB4
SERPINB10
SERPINB13
SERPINB2
SERPINB1
SERPINB12
SERPINB11
SERPINB5
CNTN1
PRICKLE1
PRICKLE2
ZNF609
ZNF608
FBLN1
MRPS35
CCDC34
CRACR2B
NANS
SNX22
RHCG
RHBG
RHAG
ACCS
ACCSL
RIC8A
RIC8B
NTRK2
NTRK3
43350
43349
43351
43354
43345
43347
43353
43355
43348
43357
SNRK
PPFIBP2
PPFIBP1
FAR1
FAR2
MICAL2
MICAL3
TEAD1
TEAD2
TEAD3
TEAD4
SLC45A3
POC1B
POC1A
TES
MOB2
NAP1L4
NAP1L1
MRPL23
LOC107987373
IGF2
BANP
ETFA
TPM1
TPM3
FOXB1
FOXB2
BNIP2
TRPM1
NUP160
KLF13
WWP2
ITCH
NEDD4L
NEDD4
SMURF2
SMURF1
WWP1
SVIP
SPI1
SPIB
WWOX
FYN
SRC
FRK
FGR
PTK6
LYN
BLK
LCK
SRMS
YES1
KCNK2
RNGTT
PNRC1
MED23
MAP3K5
MAP3K6
MAP3K15
ARV1
TTC13
PAPOLA
PAPOLB
PAPOLG
GALC
ZDHHC14
ZDHHC9
ZDHHC18
ZDHHC8
ZDHHC5
TMEM242
CYP46A1
NRXN3
IGFBP3
SIRT5
DUPD1
DAB1
DAB2
KCNK5
RAD51B
EZR
RDX
MSN
DNM3
DNM1
DNM1L
DNM2
FAM20B
FAM20C
RALGPS2
ECHDC2
AUH
CDC42BPB
CDC42BPG
CDC42BPA
EIF5
PINX1
KCNH5
KCNH1
PPP2R5E
PPP2R5C
PPP2R5B
PPP2R5A
PPP2R5D
RTN1
RTN4
RTN3
RTN2
PPP1R13B
TP53BP2
BRF1
NUDT14
JAG2
JAG1
DAAM1
DAAM2
INF2
GRID2IP
LNX1
LNX2
SCFD2
SPATA18
FRYL
FRY
SLAIN2
GMDS
SIPA1L1
SIPA1
SIPA1L2
SIPA1L3
SLC22A16
SASH1
SAMD5
SNX3
SNX12
NBAS
ROCK2
ROCK1
SCYL3
PRG4
FZD3
FZD6
FAM49A
CD2AP
SH3KBP1
OPN5
ENAH
EVL
VASP
VTA1
HIVEP2
HIVEP3
HIVEP1
VASH2
GALNT14
GALNT2
GALNT16
IFT172
MSRA
PEX7
IGF2R
RUNX2
NAPB
WDR26
RIOX1
GPHN
MGAT2
PPP1R35
TSC22D4
PAK5
JMY
LHFPL2
NOP14
HMGCR
ADD1
ADD2
ADD3
HNRNPAB
HNRNPA1
HNRNPA1L2
HNRNPA3
HNRNPA2B1
HNRNPD
HNRNPDL
SMAD7
SMAD6
SCAMP1
SCAMP3
SCAMP2
ST6GALNAC4
CDK5RAP2
NOTCH1
NOTCH2
NR6A1
SDAD1
ARID5B
RTKN
RTKN2
CAST
RFESD
NUDT2
UBAP2
UBAP2L
CELF4
CELF5
CELF3
CELF6
FAM219A
SPTAN1
SPTA1
EHMT1
EHMT2
SUV39H2
SUV39H1
SFSWAP
SMARCB1
PTPRA
TNFRSF10A
TNFRSF10B
TNFRSF10D
TNFRSF10C
AQP3
AQP9
AQP7
GSN
SCIN
AVIL
VIL1
VILL
RXRA
RXRG
PRC1
C6
MYO5B
MYO5C
MYO5A
CFAP53
RCSD1
ZBTB16
CADM1
JAM3
SUPT6H
RPL23A
TLCD1
GRIA1
GRIA2
GRIA4
GRIA3
ANKHD1-EIF4EBP3
ANKHD1
ANKRD17
PPP1R14B
TNFSF11
LOC100133315
CRCP
CNOT6
CNOT6L
DACH2
DACH1
KIF20A
KIF20B
SGCD
NDFIP1
NDFIP2
RBM41
FGFR4
FGFR3
KLF8
VTN
UNC119
UNC119B
CPD
CPM
NSRP1
43344
CCT6A
CCT6B
RNF14
P4HA2
P4HA1
HSPA4
HSPH1
HSPA4L
AMMECR1
AMMECR1L
KIF4A
KIF4B
FSTL4
FSTL5
TCF7
CAPZB
DSTYK
TMEM263
CACNA1S
CACNA1A
CACNA1D
CACNA1C
CACNA1F
CACNA1B
AQP12B
AQP12A
PAK2
ING5
ING4
ING1
ING2
ING3
IMPACT
KDM4B
KDM4E
KDM4D
KDM4C
KDM4A
CD58
SLAMF6
CD244
CD84
INSR
IGF1R
INSRR
BCOR
BCORL1
MGAT5
MGAT5B
AHR
AHRR
TPM4
IFI44L
IFI44
YJEFN3
NAXE
CELF1
CELF2
TCF3
TCF12
TCF4
SSBP4
SSBP2
SSBP3
SHC2
SHC1
SHC3
PLPP2
PLPP1
PLPP3
TLE2
TLE3
TLE4
TLE1
GNA11
GNA14
GNAQ
GNA15
CAMSAP2
CAMSAP1
CAMSAP3
UCHL5
CFH
CFHR5
CFHR4
CFHR2
F13B
CFHR3
CFHR1
LHX9
NEK7
NEK6
NEK2
NEK8
VASN
DNAJA3
PCBP4
RNF13
ZNRF4
RNF167
TSC22D2
TSC22D1
PSMD1
WWTR1
YAP1
HPS3
FETUB
PTK7
AP4B1
SAMHD1
COL9A3
L1CAM
NRCAM
CHL1
MITF
SLC34A2
PRDM5
PLCG1
PLCG2
ZHX3
ZHX1
DHX35
MAFB
NRL
NUDT3
NUDT4
NUDT10
NUDT11
HMGA1
SLC9A8
SLC9A9
SLC9A6
SLC9A7
TNNC1
B4GALT5
B4GALT6
SRSF6
SRSF4
ADTRP
CNBP
ZCCHC13
TAZ
PHLDA3
MYBPH
MYBPHL
BMP7
BMP8B
BMP6
BMP5
RBM38
RBM24
BAZ2A
P4HTM
GATA5
GATA1
GATA4
GATA3
GATA6
GATA2
POFUT1
KIF3B
KIF3C
KIF3A
LAMA5
ZMYND8
ZMYND11
KRT8
KRT7
KRT79
KRT6B
KRT5
KRT75
KRT6A
KRT6C
KRT1
KRT80
KRT4
KRT77
KRT3
KRT76
KRT84
KRT82
KRT2
KRT85
KRT73
KRT71
KRT78
KRT72
EIF4B
EIF4H
FOXP1
FOXP3
EIF4E3
PPP4R2
PHACTR3
SNX21
SNX20
SMC1A
SMC1B
NSMCE3
MAGEF1
MAGEB18
MAGEB3
MAGEB1
MAGEE1
MAGEB2
MAGEE2
MAGEB4
MAGEB17
MAGEB6
NDN
MAGEA9B
MAGEA4
MAGED1
MAGEA8
MAGEA2B
MAGEA3
MAGEC3
MAGEA6
MAGEC2
MAGEA11
MAGEA1
MAGEB10
MAGED2
MAGEA12
MAGEA10
MAGEC1
MAGEL2
MAGEH1
MAGEB5
TRO
MAGEB16
MAGED4
MAGED4B
NAA10
NAA11
CACNB3
CACNB1
CACNB4
DDX23
BIRC7
NKAIN4
NDRG3
NDRG1
NDRG2
PHF20
PHF20L1
EEF1A2
EEF1A1
MRGBP
SDCBP
SDCBP2
FBXO6
FBXO44
FBXO2
DNMT3B
DNMT3A
NOL4L
NOL4
TPD52L2
TPD52L3
TRIM55
SLC17A9
RND1
NACA
NACA2
CHIA
CHIT1
OVGP1
CHI3L2
CHI3L1
PM20D1
NUCKS1
TRPC4AP
EMP3
NSFL1C
UBXN2B
UBXN2A
PARD6B
PARD6G
CCDC115
SLMAP
SMIM4
KCTD6
ATP2B3
ATP2B2
ATP2B4
ATP2B1
BGN
LAMB2
LAMB1
LAMB4
SLC35C2
COL20A1
UBA1
UBA7
UBA6
ZNF362
GFOD1
PAX7
PAX3
KCNAB2
KCNAB3
KCNAB1
TAS1R1
HES5
RCC2
IGSF21
PHC2
SLC2A1
SLC2A3
SLC2A4
SLC2A14
SLC2A9
SLC2A2
SLC2A5
SLC2A11
SLC2A7
RAP1GAP
SPSB1
SPSB4
SPSB2
GPR157
ENO1
ENO2
ENO3
NOC2L
HES4
HES1
HES2
AGRN
PTPN11
PTPN6
PLEKHM2
DDOST
FAM131C
SULT1C4
SULT1B1
SULT1C2
SULT1A1
SULT1A2
SULT1C3
SULT1A4
SULT1A3
SULT1E1
LOC105369243
SULT6B1
SULT4A1
SULT2A1
SULT2B1
ATP13A2
ATP13A5
ATP13A3
ATP13A4
KANSL2
OLFML3
KLHL21
ERBB3
ERBB2
ERBB4
EGFR
RBMS2
RBMS1
RBMS3
PKIG
WISP2
PFKFB1
PFKFB3
PFKFB4
PFKFB2
ATP6AP1
TMEM269
CERK
DTX3
STAT6
STAT5A
STAT5B
FIGNL2
SCN8A
SCN1A
SCN4A
SCN2A
SCN9A
SCN3A
SCN11A
DIP2B
DIP2C
DIP2A
ATF7
CREB5
ATF2
PFKM
PFKL
PFKP
PHF8
KDM7A
PHF2
KDM2A
KDM2B
ARF3
ARF1
ARF4
ARF5
WNT1
RPS26
LOC101929876
LOC100996747
RPS26P11
IKZF4
LMBR1L
LMBR1
ACVR1B
ACVRL1
ACVR1
RIBC1
RIBC2
SRM
DFFA
TARDBP
PGD
KIF1B
KIF1C
KIF13A
KIF13B
UBE4B
NMNAT1
RBP7
NMNAT2
NMNAT3
CLSTN1
CLSTN2
CLSTN3
CTNNBIP1
MXRA8
CCDC50
DNAJC11
THAP3
TBX18
HMGN3
EYA4
EYA2
SLC2A12
SLC2A13
HBS1L
MYB
MYBL1
MYBL2
ORMDL2
ORMDL1
ORMDL3
MYLK2
GRASP
DGKA
DGKB
DGKG
RNF41
ANKRD52
TAF8
ITGA5
ITGA8
ITGA2B
RACGAP1
CS
SNRPG
SNRPGP15
FAM50A
FAM50B
SARS
SARS2
CHCHD6
CHCHD3
KLF15
CRHR2
CCNT1
CCNT2
TUBA1B
TUBA1A
TUBA1C
TUBA3D
TUBAL3
TUBA3E
TUBA4A
TUBA3C
TUBA8
PMEL
MFSD5
RARG
RARB
CALCOCO1
HOXC10
MIR196A2
HOXA3
HOXC8
HOXC5
HOXB1
HOXD1
HOXA1
NFE2
NFE2L1
LIMA1
SPRYD3
IGFBP6
AGAP2
TSPAN31
TSPAN13
UBE2J2
DDX19A
DDX19B
DDX25
MUL1
TOR1A
TOR1B
CD40
SALL4
BMF
KCNG1
CAMK1G
CAMK1
CAMK1D
PNCK
CAMK4
MINOS1
PPP1R14C
PPP1R14D
GHRHR
GPSM2
GPSM1
RNF146
CLTRN
SCUBE3
SCUBE1
SCUBE2
STK35
PDIK1L
SLAIN1
RPRD1B
RPRD1A
RPRD2
PIK3CA
DLG4
DLG3
DLG2
DLG1
SERP2
SGMS2
SH3GL2
VDR
CYR61
CYP17A1
PRELID1
ABCG2
ABCG5
ABCG8
ABCG4
FBXL5
SYAP1
LMNA
LMNB1
TGM1
TGM4
TGM6
TGM7
TGM2
TGM3
CUL4A
CUL3
CUL4B
RUNX1
GPC6
GPC5
CPO
CPA2
CPA3
CPB2
CPA1
CPA4
CPB1
CPA5
CPA6
NRP2
EFNB2
PCDH10
FAT1
FAT3
FAT4
FAT2
DCHS1
DCHS2
MTNR1A
MTNR1B
GPR50
TYRP1
DCT
FNIP2
FNIP1
NPY1R
GLRB
PROM1
PROM2
TAPT1
FAM184B
SLIT2
SLIT3
SLIT1
GUCY1B1
INTS12
G3BP2
G3BP1
BNC2
BNC1
RAPH1
APBB1IP
43163
VPS8
C3orf70
GPR183
UBAC2
ITGA6
ITGA7
NT5C2
NT5DC4
CD99
CD99L2
DHRSX
DHRS13
KCTD12
KCTD16
KCTD8
KCTD15
KCTD1
HHIP
NR3C2
DCLK2
DCLK1
DCX
HAND2
HAND1
GPM6A
WDR17
TENM3
RGS12
HTT
RNF24
RNF122
SMOX
PAOX
GJA5
SH3PXD2A
CXCL13
GTF3C5
LEF1
TCF7L2
GSTCD
DLL1
DLL4
AFTPH
COLGALT1
COLGALT2
CERCAM
ILF3
SOX10
SOX8
SOX9
ZC3H7B
ZC3H7A
DDX39B
DDX39A
PKN1
PKN3
PKN2
JPT1
HOOK2
CYP2W1
PRKAR1B
PRKAR2B
PRKAR2A
PRKAR1A
PDGFA
CORO7
CORO7-PAM16
SUN1
NFIX
NFIA
SH2B1
SH2B2
ATXN2L
ATXN2
SPNS1
SPNS2
SPNS3
JPT2
MAPK8IP3
LASP1
NDUFA4
EMP2
CLCN7
ABAT
CACNG2
CACNG3
ELOB
ARL6IP1
SMG1
CCDC47
GFAP
ZP3
POMZP3
TNNT1
TNNT3
TNNT2
MIR150
RNF25
KAT8
KAT5
KAT7
RARA
SGSM3
GNG5
43352
THRA
THRB
SMARCE1
PRKCB
PRKCA
PRKCG
PRKCH
PRKCE
PRKCD
PRKCQ
RBBP6
CRLF3
ENGASE
GNA13
GNA12
LLGL1
LLGL2
FSCN1
FSCN2
GNAT2
GNAZ
GNAO1
GNAT3
GNAT1
GNAI2
GNAI3
GNAI1
LFNG
RFNG
MFNG
PLA2G10
PLA2G1B
MAFK
MAFF
TMEM184A
TMEM184C
TMEM184B
PSMG3
GPR146
ATP5PD
NDEL1
NDE1
SAMD1
SAMD13
RDH8
HSD17B1
COL5A3
TRIP10
FNBP1L
FNBP1
PPAN
PPAN-P2RY11
S1PR2
RHBDF1
RHBDF2
KANK2
TEX2
RAC1
RAC3
RAC2
CDC42
STK19
CEP112
CYTH1
CYTH3
TIMP2
TIMP4
NPTX1
CDR2L
LOC101060399
XYLT2
ST6GALNAC2
UBALD2
HELZ
ARHGEF11
ARHGEF12
ZNF213
ZNF682
ZNF485
ZKSCAN7
ZNF229
ZNF852
ZNF730
ZNF530
ZNF69
ZNF134
ZNF30
ZNF540
SREBF1
ZNF124
ZNF586
ZNF883
ZNF260
ZNF501
ZNF660
ZNF670
ZNF121
ZNF146
PROZ
DUSP22
DUSP15
STYX
DUSP12
DUSP19
EXOSC4
SLC22A23
HIGD1A
HIGD1C
HIGD1B
HIGD2A
PTH1R
BAMBI
EIF2B5
GUK1
C1orf35
PIK3R3
PIK3R2
PIK3R1
SNAP47
GPT
GPT2
NPC1
NPC1L1
SCP2
UCK2
UCK1
UCKL1
ALDH9A1
PRDX1
PRDX3
PRDX2
PRDX4
SMC6
RGS18
RGS1
RGS21
RGS4
RGS16
RGS19
RGS13
RGS17
RGS8
EIF4A2
EIF4A1
EIF4A3
ZZZ3
ANXA13
IMP3
SLC35A3
SLC35A2
BCL6
GNG12
GNG7
GNG2
GNG11
GNG3
GNG10
GNGT1
GNG4
GNG13
GNG8
TROVE2
DPP6
DPP10
VAV3
VAV1
VAV2
XRN1
XRN2
GK5
GK
GK2
PPP1R7
ST3GAL3
PTPRF
PTPRD
PTPRS
PTBP3
PTBP1
PLPPR1
PBX1
PBX3
PBX2
PBX4
AGL
KLHL40
FBXL7
TOX
TOX2
FAM110B
AIRE
MFSD12
KIFAP3
HS2ST1
MED26
RPS28
KCNN1
OCLN
KCNH2
KCNH6
VOPP1
CRTC1
CRTC2
CRTC3
FNDC3B
FNDC3A
PLD1
PLD2
MAP4K4
PLPPR3
PLPPR4
PALM
CDH7
CDH19
TESK2
TESK1
THAP12
THAP8
THAP10
THAP2
TOE1
CDH6
CDH9
CDH10
EN2
CNPY1
CNPY2
DNAJB6
DNAJB7
DNAJB8
DNAJB2
ATP6V1H
CLUL1
COLEC12
RANBP9
RANBP10
SLC4A3
SLC4A10
SLC4A8
SLC4A1
SLC4A7
SLC4A5
SLC4A4
SLC4A9
FASTK
RNF220
B4GALT2
B4GALT4
B4GALT3
B4GALT1
KISS1R
KIF2C
KIF2A
KIF2B
KIF24
EIF2B3
TNR
TNN
TNC
FIBCD1
FCN2
LAMC1
LAMC3
LAMA3
SAMD7
SEC62
PRKCI
PRKCZ
PCP4L1
ZNF853
CASQ1
CASQ2
UGGT1
UGGT2
D2HGDH
KEAP1
IFT57
TMEM71
BASP1
ADCY8
EFR3A
EFR3B
PARD3
KIRREL1
KIRREL3
EIF4E2
FAM102B
GPC1
ACSL3
ACSL4
AP1S3
AP1S1
AP1S2
MBNL1
GIGYF2
GIGYF1
PER2
PER3
RORC
RORB
RORA
SH3GL1
SH3GL3
VIM
THEM6
AES
RANBP3
RANBP3L
ANKRD12
ANKRD11
RNF126
RNF115
RAB8A
RAB8B
RAB10
RAB13
UPF1
SLC25A42
SLC25A16
ZFP41
ZNF710
CYYR1
DCC
TRABD2A
TRABD2B
ASS1
FUBP3
RNF185
RNF5
MBD2
GOLGA2
GOLGA6C
GOLGA6A
GOLGA8J
GOLGA6B
GOLGA8M
GOLGA8A
GOLGA8G
GOLGA8N
GOLGA8K
GOLGA6D
GOLGA8H
GOLGA8B
GOLGA8O
GOLGA6L1
GOLGA6L2
GOLGA6L6
HAUS4
RCL1
VKORC1L1
VKORC1
HPD
MIR142
YWHAG
YWHAH
YWHAQ
YWHAE
YWHAB
SFN
HSPB1
CRYAB
CRYAA2
CRYAA
HSPB6
HSPB2
ZNHIT3
C1QBP
PIGW
DHRS11
SRRT
PTGDS
LCN15
LCN2
LCN10
LCN12
LCNL1
ZBTB43
LMX1B
LMX1A
MVB12B
BNIP3
BNIP3L
ELAC1
ME2
ME1
ME3
LIFR
OSMR
LMBRD2
NIPBL
OPN4
PDLIM5
LDB3
MYBBP1A
PAIP1
GPAT3
GPAT4
TNKS
TNKS2
TAL2
LYL1
TAL1
TOR4A
NF2
RNFT2
RNFT1
NOS1
KSR2
RFC5
WSB2
VSIG10
LZTR1
POLE
P2RX2
PES1
GAL3ST1
PPIL2
YPEL1
YPEL2
YPEL4
YPEL5
YPEL3
MAPK1
MAPK3
MAPK11
MAPK13
MAPK14
MAPK12
MAPK7
PPM1F
PPM1E
SEC14L2
SEC14L3
SEC14L4
SEC14L6
CKAP2L
PURB
PURA
PURG
H2AFV
H2AFZ
HK2
TET3
TET1
AP3M2
AP3M1
KAT6A
KAT6B
CDCA2
SEMA4C
GNB1L
HSPB8
ZNRF3
COQ5
KREMEN1
KREMEN2
PIWIL2
ASCC2
AACS
ANKLE2
GOLGA3
RANBP1
FOXN4
UBE3B
UBE3C
MVK
FAM222A
TRPV4
TRPV1
TRPV3
TRPV2
GLTP
PLEKHA8
TCHP
GIT2
GIT1
ANKRD13A
ANKRD13D
ANKRD13B
SLC6A4
SLC6A3
SLC6A2
CORO1A
CORO6
CORO2A
CORO1C
CORO2B
CORO1B
ISCU
SART3
FICD
WSCD2
SLC6A1
SLC6A11
SLC6A12
SLC6A6
SLC6A13
PIK3IP1
CAMK2B
CAMK2D
CAMK2A
CAMK2G
HS3ST1
HS3ST5
CDS2
CDS1
ARHGAP25
ARHGAP24
ARHGAP22
SH2D1A
SMARCA1
SMARCA5
LAS1L
FDX1
FDX1L
RPL36A
RPL36AL
RPL36A-HNRNPH2
GLRA4
GLRA2
GLRA3
GLRA1
AIFM1
TXNDC12
NONO
PSPC1
SFPQ
APOOL
HMGN1
STAG2
STAG3
STAG1
CWC15
FAM76B
FAM76A
GJB1
GABARAP
GABARAPL1
GABARAPL2
GABARAPL3
GPS2
TP53
CAPG
SPRR3
SENP3
SENP1
SENP2
PHF23
PHF13
ATP6V1A
ZNF703
ZNF503
DGCR8
TRMT2A
OSBP2
OSBP
OSBPL2
OSBPL1A
OSBPL7
OSBPL6
OSBPL3
RASL10B
RASL10A
AP1B1
AP2B1
EWSR1
GBGT1
ABO
TRPM6
C9orf40
ANXA1
TMC2
TMC1
ZFAND5
ZFAND6
GDA
C9orf85
ABHD17B
TMEM2
CEMIP
KLF9
FBXL15
BCO2
BCO1
RAD17
GTF2H2C_2
GTF2H2
GTF2H2C
ARVCF
CTNND2
CTNND1
TANGO2
TMEM150A
RNF181
CCDC117
TCN2
GIF
TCN1
ARAF
BRAF
RAF1
[truncated: 3,107 more rows]
