# Supplementary material for: SATB2 induction of a neural crest mesenchyme-like program drives melanoma invasion and drug resistance
Source: eLife. 2021 Feb 2;10:e64370. doi: 10.7554/eLife.64370 (PMC7880683; doi:10.7554/eLife.64370)
Supplement: Supplementary file 4. — (Sheet 1) Genes with a log(2) fold change >1.0 and a p-value<0.05. (Sheet 2) Unfiltered RNA-seq expression data. [file elife-64370-supp4.xlsx]

## Sheet: FC>1 p<0.05
test_id	gene_id	gene	locus	sample_1	sample_2	status	value_1	value_2	log2(fold_change)	test_stat	p_value	q_value	significant	Adjust log2FC
LCN2	LCN2	LCN2	chr9:130911731-130915734	ctrl	dox	OK	0	7.94223	inf	#NAME?	5e-05	0.000758876	yes	9.63522	9.63522
FAM25A	FAM25A	FAM25A	chr10:88780045-88784487	ctrl	dox	OK	0	7.35705	inf	#NAME?	5e-05	0.000758876	yes	9.52494
CIDEA	CIDEA	CIDEA	chr18:12254317-12277594	ctrl	dox	OK	0	6.57166	inf	#NAME?	5e-05	0.000758876	yes	9.36231
PDCD1	PDCD1	PDCD1	chr2:242792032-242801058	ctrl	dox	OK	0	6.54438	inf	#NAME?	5e-05	0.000758876	yes	9.35632
LOC102546229	LOC102546229	LOC102546229	chr5:133764741-133770738	ctrl	dox	OK	0	6.12794	inf	#NAME?	5e-05	0.000758876	yes	9.26161
WNT11	WNT11	WNT11	chr11:75897369-75917574	ctrl	dox	OK	0	4.6765	inf	#NAME?	5e-05	0.000758876	yes	8.87237
CHST13	CHST13	CHST13	chr3:126243130-126262134	ctrl	dox	OK	0	3.17727	inf	#NAME?	5e-05	0.000758876	yes	8.31618
FAM132A	FAM132A	FAM132A	chr1:1177825-1182102	ctrl	dox	OK	0	3.14991	inf	#NAME?	5e-05	0.000758876	yes	8.30374
NCMAP	NCMAP	NCMAP	chr1:24882566-24935818	ctrl	dox	OK	0	2.55217	inf	#NAME?	5e-05	0.000758876	yes	8.00122
SBK3	SBK3	SBK3	chr19:56052022-56056909	ctrl	dox	OK	0	2.47938	inf	#NAME?	5e-05	0.000758876	yes	7.95964
PGC	PGC	PGC	chr6:41704448-41715139	ctrl	dox	OK	0	2.46749	inf	#NAME?	5e-05	0.000758876	yes	7.95274
P2RX3	P2RX3	P2RX3	chr11:57105840-57137549	ctrl	dox	OK	0	2.3826	inf	#NAME?	5e-05	0.000758876	yes	7.90244
SBK2	SBK2	SBK2	chr19:56041099-56048435	ctrl	dox	OK	0	2.35909	inf	#NAME?	5e-05	0.000758876	yes	7.88819
TRIM29	TRIM29	TRIM29	chr11:119981993-120008863	ctrl	dox	OK	0.0526589	14.4486	8.10004	7.4425	0.00055	0.00600319	yes	7.85019
CCR3	CCR3	CCR3	chr3:46283871-46308197	ctrl	dox	OK	0	2.12942	inf	#NAME?	5e-05	0.000758876	yes	7.74108
EDN2	EDN2	EDN2	chr1:41944445-41950344	ctrl	dox	OK	0	2.09645	inf	#NAME?	5e-05	0.000758876	yes	7.71867
PSG11	PSG11	PSG11	chr19:43511808-43530631	ctrl	dox	OK	0	1.86211	inf	#NAME?	5e-05	0.000758876	yes	7.54852
ARHGDIG	ARHGDIG	ARHGDIG	chr16:330605-333003	ctrl	dox	OK	0	1.75229	inf	#NAME?	5e-05	0.000758876	yes	7.46131
TRPV6	TRPV6	TRPV6	chr7:142568955-142583490	ctrl	dox	OK	0	1.67044	inf	#NAME?	5e-05	0.000758876	yes	7.3927
PSG1	PSG1	PSG1	chr19:43370612-43383871	ctrl	dox	OK	0	1.65345	inf	#NAME?	5e-05	0.000758876	yes	7.37803
LY6H	LY6H	LY6H	chr8:144239330-144242053	ctrl	dox	OK	0	1.65044	inf	#NAME?	5e-05	0.000758876	yes	7.37542
LCN1	LCN1	LCN1	chr9:138413283-138418386	ctrl	dox	OK	0	1.6084	inf	#NAME?	5e-05	0.000758876	yes	7.33842
KCNK9	KCNK9	KCNK9	chr8:140613080-140715299	ctrl	dox	OK	0.0687694	12.7091	7.52988	6.53947	0.00035	0.00411812	yes	7.33515
GSDMA	GSDMA	GSDMA	chr17:38119225-38134019	ctrl	dox	OK	0	1.52909	inf	#NAME?	5e-05	0.000758876	yes	7.26593
LILRB2	LILRB2	LILRB2	chr19:54777674-54785033	ctrl	dox	OK	0	1.5207	inf	#NAME?	5e-05	0.000758876	yes	7.25805
TIE1	TIE1	TIE1	chr1:43766565-43788781	ctrl	dox	OK	0.0938501	15.8309	7.39817	5.96438	5e-05	0.000758876	yes	7.25301
TNNI2	TNNI2	TNNI2	chr11:1860232-1862910	ctrl	dox	OK	0	1.44472	inf	#NAME?	5e-05	0.000758876	yes	7.1846
APOA4	APOA4	APOA4	chr11:116691417-116694011	ctrl	dox	OK	0	1.44424	inf	#NAME?	5e-05	0.000758876	yes	7.18412
MT4	MT4	MT4	chr16:56598960-56602869	ctrl	dox	OK	0	1.38758	inf	#NAME?	0.0003	0.00361996	yes	7.12679
GATA5	GATA5	GATA5	chr20:61038552-61051026	ctrl	dox	OK	0	1.38191	inf	#NAME?	5e-05	0.000758876	yes	7.12092
PAK6	PAK6	PAK6	chr15:40453209-40569688	ctrl	dox	OK	0.0223695	4.4689	7.64224	0.750558	0.0024	0.0196498	yes	7.11237
GAL	GAL	GAL	chr11:68451982-68458643	ctrl	dox	OK	0	1.34966	inf	#NAME?	5e-05	0.000758876	yes	7.0871
SERPINH1	SERPINH1	SERPINH1	chr11:75273100-75283849	ctrl	dox	OK	0.0538155	8.48254	7.30033	5.30155	0.00125	0.0116048	yes	7.05615
THEG	THEG	THEG	chr19:362056-376013	ctrl	dox	OK	0	1.2983	inf	#NAME?	5e-05	0.000758876	yes	7.03155
KLK7	KLK7	KLK7	chr19:51479734-51487320	ctrl	dox	OK	0	1.25921	inf	#NAME?	5e-05	0.000758876	yes	6.98779
PSTPIP1	PSTPIP1	PSTPIP1	chr15:77287464-77329671	ctrl	dox	OK	0	1.1681	inf	#NAME?	5e-05	0.000758876	yes	6.88032
RAET1L	RAET1L	RAET1L	chr6:150341265-150346668	ctrl	dox	OK	0	1.15482	inf	#NAME?	5e-05	0.000758876	yes	6.86396
KRT16P3	KRT16P3	KRT16P3	chr17:20404826-20407811	ctrl	dox	OK	0	1.10732	inf	#NAME?	5e-05	0.000758876	yes	6.8039
TMEM88B	TMEM88B	TMEM88B	chr1:1361507-1363167	ctrl	dox	OK	0	1.06097	inf	#NAME?	5e-05	0.000758876	yes	6.74277
NKAIN4	NKAIN4	NKAIN4	chr20:61872135-61892967	ctrl	dox	OK	0.124055	14.1271	6.83135	6.08787	0.00075	0.007695	yes	6.72052
PVRL4	PVRL4	PVRL4	chr1:161040780-161059385	ctrl	dox	OK	0.0423546	5.21943	6.94523	5.26093	0.00285	0.0224536	yes	6.64219
LY6D	LY6D	LY6D	chr8:143866297-143868008	ctrl	dox	OK	0	0.963733	inf	#NAME?	5e-05	0.000758876	yes	6.60545
TBC1D10C	TBC1D10C	TBC1D10C	chr11:67171383-67177561	ctrl	dox	OK	0	0.953112	inf	#NAME?	5e-05	0.000758876	yes	6.58963
EPHB3	EPHB3	EPHB3	chr3:184279586-184300196	ctrl	dox	OK	0.836098	79.652	6.57389	10.554	5e-05	0.000758876	yes	6.55692
SATB2	SATB2	SATB2	chr2:200134222-200337481	ctrl	dox	OK	12.7172	1183.9	6.54062	11.6377	5e-05	0.000758876	yes	6.5395
ALPPL2	ALPPL2	ALPPL2	chr2:233271551-233275424	ctrl	dox	OK	0	0.914405	inf	#NAME?	5e-05	0.000758876	yes	6.53045
NTF4	NTF4	NTF4	chr19:49564396-49567124	ctrl	dox	OK	0	0.896119	inf	#NAME?	5e-05	0.000758876	yes	6.50163
C1QTNF4	C1QTNF4	C1QTNF4	chr11:47611215-47615961	ctrl	dox	OK	0	0.894961	inf	#NAME?	5e-05	0.000758876	yes	6.49978
NKX2-8	NKX2-8	NKX2-8	chr14:37049215-37051786	ctrl	dox	OK	0	0.888259	inf	#NAME?	5e-05	0.000758876	yes	6.48906
C11orf86	C11orf86	C11orf86	chr11:66742753-66744479	ctrl	dox	OK	0.345357	31.7385	6.52201	6.80136	5e-05	0.000758876	yes	6.48128
SRMS	SRMS	SRMS	chr20:62171276-62178857	ctrl	dox	OK	0	0.869669	inf	#NAME?	5e-05	0.000758876	yes	6.45889
ODF3L2	ODF3L2	ODF3L2	chr19:463345-474983	ctrl	dox	OK	0	0.845779	inf	#NAME?	5e-05	0.000758876	yes	6.41917
LYPD2	LYPD2	LYPD2	chr8:143831627-143833952	ctrl	dox	OK	0	0.840681	inf	#NAME?	5e-05	0.000758876	yes	6.41055
USH1C	USH1C	USH1C	chr11:17515441-17565963	ctrl	dox	OK	0.0505049	5.06439	6.64782	4.81023	0.00075	0.007695	yes	6.39004
KIF19	KIF19	KIF19	chr17:72322350-72351959	ctrl	dox	OK	0	0.81542	inf	#NAME?	5e-05	0.000758876	yes	6.36706
AQP7	AQP7	AQP7	chr9:33384947-33402517	ctrl	dox	OK	0	0.770751	inf	#NAME?	5e-05	0.000758876	yes	6.28679
MYT1	MYT1	MYT1	chr20:62795826-62873606	ctrl	dox	OK	0.118	9.97741	6.4018	7.30164	5e-05	0.000758876	yes	6.28589
NTRK1	NTRK1	NTRK1	chr1:156776034-156851642	ctrl	dox	OK	0.0434325	4.03511	6.53769	2.18505	0.0062	0.0410324	yes	6.24232
DUSP27	DUSP27	DUSP27	chr1:167064086-167098402	ctrl	dox	OK	0.03019	2.9985	6.63402	5.18107	0.00115	0.0108276	yes	6.22606
TNF	TNF	TNF	chr6_ssto_hap7:2874144-2876913	ctrl	dox	OK	0	0.737617	inf	#NAME?	5e-05	0.000758876	yes	6.22423
RBP1	RBP1	RBP1	chr3:139236275-139258671	ctrl	dox	OK	0	0.718811	inf	#NAME?	5e-05	0.000758876	yes	6.18747
TMEM151A	TMEM151A	TMEM151A	chr11:66059372-66064135	ctrl	dox	OK	0	0.714431	inf	#NAME?	5e-05	0.000758876	yes	6.17878
PTGDS	PTGDS	PTGDS	chr9:139871955-139876194	ctrl	dox	OK	0	0.711805	inf	#NAME?	5e-05	0.000758876	yes	6.17354
VPREB3	VPREB3	VPREB3	chr22:24094929-24096630	ctrl	dox	OK	0	0.689994	inf	#NAME?	5e-05	0.000758876	yes	6.12927
VWA1	VWA1	VWA1	chr1:1370902-1378262	ctrl	dox	OK	0.0362663	3.16395	6.44695	5.50464	0.00015	0.001995	yes	6.10017
HCN4	HCN4	HCN4	chr15:73612199-73661605	ctrl	dox	OK	0	0.669647	inf	#NAME?	5e-05	0.000758876	yes	6.08671
DMBT1	DMBT1	DMBT1	chr10:124320180-124403252	ctrl	dox	OK	0.218199	14.6894	6.07298	5.44005	5e-05	0.000758876	yes	6.00932
MYLK3	MYLK3	MYLK3	chr16:46736193-46782221	ctrl	dox	OK	0.167767	10.4133	5.95583	7.88226	5e-05	0.000758876	yes	5.87368
PRSS8	PRSS8	PRSS8	chr16:31142753-31147151	ctrl	dox	OK	0.0517172	3.60004	6.12123	4.16067	0.00795	0.0498402	yes	5.8702
MAFA	MAFA	MAFA	chr8:144510229-144512602	ctrl	dox	OK	0.176761	10.5951	5.90545	6.20071	5e-05	0.000758876	yes	5.82742
BPIFB3	BPIFB3	BPIFB3	chr20:31643229-31661434	ctrl	dox	OK	0	0.5422	inf	#NAME?	5e-05	0.000758876	yes	5.78712
GPRIN2	GPRIN2	GPRIN2	chr10:46993545-47000568	ctrl	dox	OK	0	0.540975	inf	#NAME?	5e-05	0.000758876	yes	5.78391
CCL22	CCL22	CCL22	chr16:57392694-57400102	ctrl	dox	OK	0	0.539048	inf	#NAME?	5e-05	0.000758876	yes	5.77886
PRR5L	PRR5L	PRR5L	chr11:36317724-36486754	ctrl	dox	OK	0.299923	16.8935	5.81573	7.48136	5e-05	0.000758876	yes	5.76927
CHRNA4	CHRNA4	CHRNA4	chr20:61974661-62002529	ctrl	dox	OK	0	0.533678	inf	#NAME?	5e-05	0.000758876	yes	5.76468
LOC400558	LOC400558	LOC400558	chr16:89232790-89235555	ctrl	dox	OK	0	0.53235	inf	#NAME?	5e-05	0.000758876	yes	5.76115
ITGB4	ITGB4	ITGB4	chr17:73717515-73753899	ctrl	dox	OK	0.108002	6.29853	5.86589	6.94649	5e-05	0.000758876	yes	5.74042
KCNE3	KCNE3	KCNE3	chr11:74165885-74178600	ctrl	dox	OK	0	0.52208	inf	#NAME?	5e-05	0.000758876	yes	5.73357
FRG2B	FRG2B	FRG2B	chr10:135438602-135440299	ctrl	dox	OK	0.109245	6.3015	5.85006	3.90349	0.00795	0.0498402	yes	5.72598
PKP1	PKP1	PKP1	chr1:201252579-201302121	ctrl	dox	OK	0	0.518292	inf	#NAME?	5e-05	0.000758876	yes	5.72326
GZMM	GZMM	GZMM	chr19:544033-549920	ctrl	dox	OK	0.201655	11.0857	5.78066	5.4262	0.0001	0.00140493	yes	5.71214
ECSCR	ECSCR	ECSCR	chr5:138784244-138842320	ctrl	dox	OK	1.59957	83.99	5.71446	6.69611	5e-05	0.000758876	yes	5.70564
SEMA3F	SEMA3F	SEMA3F	chr3:50192847-50226508	ctrl	dox	OK	0.348862	18.5042	5.72905	7.34142	5e-05	0.000758876	yes	5.68906
SLC13A5	SLC13A5	SLC13A5	chr17:6588031-6616740	ctrl	dox	OK	0.387185	20.4439	5.7225	6.38699	5e-05	0.000758876	yes	5.68642
RGS8	RGS8	RGS8	chr1:182615791-182642067	ctrl	dox	OK	0	0.497436	inf	#NAME?	5e-05	0.000758876	yes	5.66515
IFNA4	IFNA4	IFNA4	chr9:21186617-21187598	ctrl	dox	OK	0	0.496448	inf	#NAME?	5e-05	0.000758876	yes	5.66234
CGB	CGB	CGB	chr19:49526125-49527632	ctrl	dox	OK	0	0.495372	inf	#NAME?	5e-05	0.000758876	yes	5.65927
PRSS21	PRSS21	PRSS21	chr16:2867163-2871723	ctrl	dox	OK	0	0.494978	inf	#NAME?	5e-05	0.000758876	yes	5.65815
PDLIM4	PDLIM4	PDLIM4	chr5:131593350-131609147	ctrl	dox	OK	0.0777915	4.41984	5.82824	4.78866	0.0005	0.00552122	yes	5.65703
GATA1	GATA1	GATA1	chrX:48644981-48652717	ctrl	dox	OK	0	0.49457	inf	#NAME?	5e-05	0.000758876	yes	5.65698
HBA1	HBA1	HBA1	chr16:226678-227520	ctrl	dox	OK	0	0.494303	inf	#NAME?	5e-05	0.000758876	yes	5.65622
TMEM59L	TMEM59L	TMEM59L	chr19:18723681-18731849	ctrl	dox	OK	0.0917551	5.09866	5.79619	4.80729	0.002	0.0169467	yes	5.64977
MDFI	MDFI	MDFI	chr6:41606194-41621982	ctrl	dox	OK	0.469563	24.0144	5.67644	6.95978	5e-05	0.000758876	yes	5.64664
FAM170A	FAM170A	FAM170A	chr5:118965253-118971517	ctrl	dox	OK	0	0.486069	inf	#NAME?	5e-05	0.000758876	yes	5.63247
PDZD3	PDZD3	PDZD3	chr11:119056165-119060932	ctrl	dox	OK	0	0.482924	inf	#NAME?	5e-05	0.000758876	yes	5.62329
CD8A	CD8A	CD8A	chr2:87011727-87035519	ctrl	dox	OK	0	0.48083	inf	#NAME?	5e-05	0.000758876	yes	5.61715
GGT1	GGT1	GGT1	chr22:24979717-25024972	ctrl	dox	OK	0.0954362	5.01744	5.71627	4.44285	5e-05	0.000758876	yes	5.57538
VSIG2	VSIG2	VSIG2	chr11:124617369-124622109	ctrl	dox	OK	0	0.466593	inf	#NAME?	5e-05	0.000758876	yes	5.57469
RHOD	RHOD	RHOD	chr11:66824288-66839488	ctrl	dox	OK	0	0.459116	inf	#NAME?	5e-05	0.000758876	yes	5.55187
ICOSLG	ICOSLG	ICOSLG	chr21:45642877-45660887	ctrl	dox	OK	0.086462	4.47064	5.69227	3.94895	5e-05	0.000758876	yes	5.5376
SMCR9	SMCR9	SMCR9	chr17:17322657-17326728	ctrl	dox	OK	0	0.452328	inf	#NAME?	0.0003	0.00361996	yes	5.53084
RBBP8NL	RBBP8NL	RBBP8NL	chr20:60985292-61002629	ctrl	dox	OK	0	0.439394	inf	#NAME?	5e-05	0.000758876	yes	5.48991
MLC1	MLC1	MLC1	chr22:50497819-50524358	ctrl	dox	OK	0.0305611	1.78029	5.86427	3.91798	0.00135	0.0123418	yes	5.46395
LINC01101	LINC01101	LINC01101	chr2:121221910-121223925	ctrl	dox	OK	0	0.42974	inf	#NAME?	5e-05	0.000758876	yes	5.45858
WNT6	WNT6	WNT6	chr2:219724545-219738954	ctrl	dox	OK	0.11275	5.37155	5.57413	4.87228	0.0024	0.0196498	yes	5.45423
VIL1	VIL1	VIL1	chr2:219283837-219314248	ctrl	dox	OK	0	0.426177	inf	#NAME?	5e-05	0.000758876	yes	5.44684
ALS2CL	ALS2CL	ALS2CL	chr3:46710484-46735194	ctrl	dox	OK	0.183204	8.31473	5.50415	5.93562	5e-05	0.000758876	yes	5.42921
PTGIR	PTGIR	PTGIR	chr19:47123724-47128354	ctrl	dox	OK	0	0.417325	inf	#NAME?	5e-05	0.000758876	yes	5.41726
LOC101928292	LOC101928292	LOC101928292	chr11:69300328-69308311	ctrl	dox	OK	0.0838786	3.96916	5.56439	4.73311	5e-05	0.000758876	yes	5.40552
MYO1G	MYO1G	MYO1G	chr7:45002259-45018704	ctrl	dox	OK	0	0.408351	inf	#NAME?	5e-05	0.000758876	yes	5.38664
CRYGC	CRYGC	CRYGC	chr2:208983852-209021486	ctrl	dox	OK	0	0.398139	inf	#NAME?	0.0003	0.00361996	yes	5.35099
DOC2B	DOC2B	DOC2B	chr17:6010-31421	ctrl	dox	OK	0	0.396351	inf	#NAME?	5e-05	0.000758876	yes	5.34465
SLC38A3	SLC38A3	SLC38A3	chr3:50242678-50258411	ctrl	dox	OK	0	0.394631	inf	#NAME?	5e-05	0.000758876	yes	5.33853
ATP12A	ATP12A	ATP12A	chr13:25254548-25285923	ctrl	dox	OK	0	0.394508	inf	#NAME?	5e-05	0.000758876	yes	5.3381
SERPINA13P	SERPINA13P	SERPINA13P	chr14:95107061-95113331	ctrl	dox	OK	0	0.38528	inf	#NAME?	5e-05	0.000758876	yes	5.3048
EFS	EFS	EFS	chr14:23825608-23834842	ctrl	dox	OK	0	0.384501	inf	#NAME?	5e-05	0.000758876	yes	5.30196
CRABP2	CRABP2	CRABP2	chr1:156669399-156675608	ctrl	dox	OK	0.714536	28.5083	5.31823	6.23054	5e-05	0.000758876	yes	5.29869
LTC4S	LTC4S	LTC4S	chr5:179220985-179223513	ctrl	dox	OK	0	0.380049	inf	#NAME?	0.0001	0.00140493	yes	5.28558
KRT16P2	KRT16P2	KRT16P2	chr17:16733796-16736147	ctrl	dox	OK	0	0.378186	inf	#NAME?	5e-05	0.000758876	yes	5.27868
CD247	CD247	CD247	chr1:167399876-167487847	ctrl	dox	OK	0.108367	4.55956	5.3949	4.21373	0.0012	0.0112102	yes	5.27072
OTOF	OTOF	OTOF	chr2:26680070-26781566	ctrl	dox	OK	0	0.373592	inf	#NAME?	5e-05	0.000758876	yes	5.2615
SLURP1	SLURP1	SLURP1	chr8:143822361-143823829	ctrl	dox	OK	0	0.369514	inf	#NAME?	0.0004	0.00458914	yes	5.24608
KRT79	KRT79	KRT79	chr12:53215230-53228077	ctrl	dox	OK	0.306221	11.9761	5.28944	5.93004	5e-05	0.000758876	yes	5.24429
SYP	SYP	SYP	chrX:49044264-49058913	ctrl	dox	OK	1.06554	40.6629	5.25405	7.93722	5e-05	0.000758876	yes	5.24093
C1orf127	C1orf127	C1orf127	chr1:11006529-11042094	ctrl	dox	OK	0	0.368143	inf	#NAME?	5e-05	0.000758876	yes	5.24086
TBC1D26	TBC1D26	TBC1D26	chr17:15635590-15648098	ctrl	dox	OK	0	0.365857	inf	#NAME?	5e-05	0.000758876	yes	5.23211
MYL3	MYL3	MYL3	chr3:46899356-46904973	ctrl	dox	OK	0	0.365135	inf	#NAME?	5e-05	0.000758876	yes	5.22934
LINC00521	LINC00521	LINC00521	chr14:94463615-94478041	ctrl	dox	OK	0	0.364556	inf	#NAME?	5e-05	0.000758876	yes	5.22711
CRLF1	CRLF1	CRLF1	chr19:18704034-18717660	ctrl	dox	OK	0.458095	17.4442	5.25096	6.8754	5e-05	0.000758876	yes	5.22063
ADAMTS4	ADAMTS4	ADAMTS4	chr1:161159537-161168845	ctrl	dox	OK	0.12522	4.99412	5.31769	6.28301	5e-05	0.000758876	yes	5.20974
ST14	ST14	ST14	chr11:130029681-130080257	ctrl	dox	OK	0.266466	10.1738	5.25477	5.37335	5e-05	0.000758876	yes	5.20303
SPEG	SPEG	SPEG	chr2:220299699-220358354	ctrl	dox	OK	0.229045	8.79084	5.2623	4.15158	5e-05	0.000758876	yes	5.20229
EPPK1	EPPK1	EPPK1	chr8:144939491-144952632	ctrl	dox	OK	0.0382509	1.76591	5.52878	5.08024	5e-05	0.000758876	yes	5.20186
MISP	MISP	MISP	chr19:751145-764318	ctrl	dox	OK	0.147393	5.71251	5.27639	5.98784	5e-05	0.000758876	yes	5.1842
PAX4	PAX4	PAX4	chr7:127250345-127255780	ctrl	dox	OK	0	0.352	inf	#NAME?	5e-05	0.000758876	yes	5.17792
KIF1A	KIF1A	KIF1A	chr2:241653180-241759725	ctrl	dox	OK	0.0143973	0.866603	5.9115	4.12671	0.0013	0.0119639	yes	5.16713
DNASE1L3	DNASE1L3	DNASE1L3	chr3:58178352-58196730	ctrl	dox	OK	0	0.345999	inf	#NAME?	5e-05	0.000758876	yes	5.1538
COL15A1	COL15A1	COL15A1	chr9:101705994-101833074	ctrl	dox	OK	0.330336	12.0745	5.19189	7.63912	5e-05	0.000758876	yes	5.15005
TNNT3	TNNT3	TNNT3	chr11:1940798-1959936	ctrl	dox	OK	0	0.344972	inf	#NAME?	5e-05	0.000758876	yes	5.14963
ALPP	ALPP	ALPP	chr2:233243347-233247599	ctrl	dox	OK	0	0.337549	inf	#NAME?	5e-05	0.000758876	yes	5.11914
PTH2	PTH2	PTH2	chr19:49925670-49926698	ctrl	dox	OK	0	0.329618	inf	#NAME?	0.00635	0.0417482	yes	5.08584
CREB3L3	CREB3L3	CREB3L3	chr19:4153597-4173051	ctrl	dox	OK	0.0604257	2.3811	5.30032	3.61512	0.00025	0.00312152	yes	5.08543
GNLY	GNLY	GNLY	chr2:85921413-85925875	ctrl	dox	OK	0.372776	12.5894	5.07775	4.95604	5e-05	0.000758876	yes	5.04071
SCARF1	SCARF1	SCARF1	chr17:1537151-1549083	ctrl	dox	OK	0.0329052	1.39706	5.40793	2.93369	0.0008	0.00807874	yes	5.03539
EXOC3L2	EXOC3L2	EXOC3L2	chr19:45715878-45737469	ctrl	dox	OK	0.124106	4.37746	5.14045	4.69457	0.0001	0.00140493	yes	5.03194
ACAN	ACAN	ACAN	chr15:89346673-89418585	ctrl	dox	OK	1.26342	41.1475	5.0254	10.5847	5e-05	0.000758876	yes	5.01438
OR1F1	OR1F1	OR1F1	chr16:3254246-3255185	ctrl	dox	OK	0	0.307736	inf	#NAME?	0.0001	0.00140493	yes	4.98976
IL17B	IL17B	IL17B	chr5:148753829-148758838	ctrl	dox	OK	0.304491	9.9205	5.02594	4.47055	0.00045	0.00505616	yes	4.98078
FIGNL2	FIGNL2	FIGNL2	chr12:52211675-52225701	ctrl	dox	OK	0	0.305452	inf	#NAME?	5e-05	0.000758876	yes	4.97935
IL23A	IL23A	IL23A	chr12:56732662-56734194	ctrl	dox	OK	0.293047	9.5328	5.0237	4.85165	5e-05	0.000758876	yes	4.9768
PYY	PYY	PYY	chr17:42030106-42081837	ctrl	dox	OK	0	0.303821	inf	#NAME?	5e-05	0.000758876	yes	4.97187
IL32	IL32	IL32	chr16:3115312-3119668	ctrl	dox	OK	0.233008	7.53135	5.01446	3.12309	5e-05	0.000758876	yes	4.95575
FAM3D	FAM3D	FAM3D	chr3:58619669-58652561	ctrl	dox	OK	0	0.300161	inf	#NAME?	5e-05	0.000758876	yes	4.95495
LBH	LBH	LBH	chr2:30454396-30482899	ctrl	dox	OK	0.726187	22.8101	4.97319	7.14616	5e-05	0.000758876	yes	4.95409
ESPNL	ESPNL	ESPNL	chr2:239008950-239041928	ctrl	dox	OK	0.0184836	0.872317	5.56054	3.76338	0.00795	0.0498402	yes	4.95309
PDE2A	PDE2A	PDE2A	chr11:72287183-72385497	ctrl	dox	OK	0.160744	5.23338	5.0249	5.93478	5e-05	0.000758876	yes	4.94059
KRT6A	KRT6A	KRT6A	chr12:52880957-52887181	ctrl	dox	OK	0	0.295572	inf	#NAME?	5e-05	0.000758876	yes	4.93344
IL11	IL11	IL11	chr19:55875749-55881831	ctrl	dox	OK	3.24496	98.8968	4.92965	9.33996	5e-05	0.000758876	yes	4.92536
TRIM53AP	TRIM53AP	TRIM53AP	chr11:89570045-89673722	ctrl	dox	OK	0	0.292924	inf	#NAME?	5e-05	0.000758876	yes	4.92088
TBC1D3P2	TBC1D3P2	TBC1D3P2	chr17:60342066-60353016	ctrl	dox	OK	0	0.29136	inf	#NAME?	5e-05	0.000758876	yes	4.91342
LINC00866	LINC00866	LINC00866	chr10:99588234-99609555	ctrl	dox	OK	0	0.290912	inf	#NAME?	0.0064	0.0420461	yes	4.91127
F7	F7	F7	chr13:113760101-113774995	ctrl	dox	OK	0	0.28967	inf	#NAME?	5e-05	0.000758876	yes	4.9053
SHC2	SHC2	SHC2	chr19:416582-460996	ctrl	dox	OK	0.101316	3.32312	5.0356	4.58775	0.00015	0.001995	yes	4.90414
PXDN	PXDN	PXDN	chr2:1635658-1748291	ctrl	dox	OK	0	0.287219	inf	#NAME?	5e-05	0.000758876	yes	4.89345
IL34	IL34	IL34	chr16:70613797-70694585	ctrl	dox	OK	0.101386	3.29728	5.02335	4.17386	0.00055	0.00600319	yes	4.89201
IL13	IL13	IL13	chr5:131993864-131996801	ctrl	dox	OK	0	0.286264	inf	#NAME?	5e-05	0.000758876	yes	4.88881
SERPINA11	SERPINA11	SERPINA11	chr14:94908800-94919122	ctrl	dox	OK	0	0.281674	inf	#NAME?	5e-05	0.000758876	yes	4.86628
FCRL6	FCRL6	FCRL6	chr1:159770300-159786047	ctrl	dox	OK	0	0.281466	inf	#NAME?	5e-05	0.000758876	yes	4.86526
ABLIM2	ABLIM2	ABLIM2	chr4:7967036-8160559	ctrl	dox	OK	0.144661	4.38948	4.9233	4.97225	5e-05	0.000758876	yes	4.83015
CDH15	CDH15	CDH15	chr16:89238162-89261900	ctrl	dox	OK	0.0656951	2.13002	5.01894	4.37091	0.0002	0.00255224	yes	4.82128
C20orf166-AS1	C20orf166-AS1	C20orf166-AS1	chr20:61141437-61167971	ctrl	dox	OK	0	0.272551	inf	#NAME?	5e-05	0.000758876	yes	4.82044
TTLL10	TTLL10	TTLL10	chr1:1109285-1133313	ctrl	dox	OK	0	0.270139	inf	#NAME?	5e-05	0.000758876	yes	4.80807
CNTFR	CNTFR	CNTFR	chr9:34551429-34590138	ctrl	dox	OK	0.0502678	1.67745	5.06049	2.73211	0.00155	0.0137569	yes	4.80731
EBI3	EBI3	EBI3	chr19:4229539-4237524	ctrl	dox	OK	0.298574	8.59241	4.8469	4.28605	0.00015	0.001995	yes	4.80105
KDR	KDR	KDR	chr4:55944425-55991762	ctrl	dox	OK	1.19875	33.4163	4.80095	9.08667	5e-05	0.000758876	yes	4.7894
GPR142	GPR142	GPR142	chr17:72363644-72368739	ctrl	dox	OK	0	0.265941	inf	#NAME?	5e-05	0.000758876	yes	4.78629
KCNJ11	KCNJ11	KCNJ11	chr11:17406795-17410878	ctrl	dox	OK	0.0712286	2.22732	4.96671	4.16922	5e-05	0.000758876	yes	4.78364
CACNG1	CACNG1	CACNG1	chr17:65040651-65052911	ctrl	dox	OK	0	0.264249	inf	#NAME?	5e-05	0.000758876	yes	4.77741
PRSS22	PRSS22	PRSS22	chr16:2902727-2908171	ctrl	dox	OK	0.110463	3.2466	4.87729	3.5955	0.00285	0.0224536	yes	4.7567
LIMS2	LIMS2	LIMS2	chr2:128395995-128439360	ctrl	dox	OK	0.0497334	1.59878	5.00662	1.85978	0.00255	0.0206147	yes	4.75129
PDGFB	PDGFB	PDGFB	chr22:39619684-39640957	ctrl	dox	OK	0.135992	3.88888	4.83776	4.46248	5e-05	0.000758876	yes	4.7391
NOVA2	NOVA2	NOVA2	chr19:46442770-46476657	ctrl	dox	OK	0	0.255596	inf	#NAME?	5e-05	0.000758876	yes	4.73116
RASGEF1A	RASGEF1A	RASGEF1A	chr10:43689980-43762367	ctrl	dox	OK	0.0913109	2.66931	4.86954	4.56432	5e-05	0.000758876	yes	4.725
KLK11	KLK11	KLK11	chr19:51525486-51531290	ctrl	dox	OK	0	0.25403	inf	#NAME?	5e-05	0.000758876	yes	4.72263
FAM157B	FAM157B	FAM157B	chr9:141106636-141134172	ctrl	dox	OK	0	0.252376	inf	#NAME?	5e-05	0.000758876	yes	4.71356
FFAR1	FFAR1	FFAR1	chr19:35842444-35843367	ctrl	dox	OK	0	0.249834	inf	#NAME?	0.00065	0.00685708	yes	4.69952
C10orf120	C10orf120	C10orf120	chr10:124457224-124459338	ctrl	dox	OK	0	0.244621	inf	#NAME?	5e-05	0.000758876	yes	4.67028
RAET1K	RAET1K	RAET1K	chr6:150319154-150326280	ctrl	dox	OK	0.248415	6.54052	4.71858	4.93522	5e-05	0.000758876	yes	4.66385
CES1P2	CES1P2	CES1P2	chr16:55758836-55784123	ctrl	dox	OK	0	0.241834	inf	#NAME?	5e-05	0.000758876	yes	4.6544
ZNF853	ZNF853	ZNF853	chr7:6655526-6663921	ctrl	dox	OK	0.0337764	1.08753	5.0089	3.9025	0.00145	0.01305	yes	4.64796
TMIE	TMIE	TMIE	chr3:46742822-46752413	ctrl	dox	OK	0.0955913	2.63694	4.78584	4.09639	0.00045	0.00505616	yes	4.64776
PTPN7	PTPN7	PTPN7	chr1:202116140-202130716	ctrl	dox	OK	0.295874	7.65537	4.69342	5.47611	5e-05	0.000758876	yes	4.64735
LCN10	LCN10	LCN10	chr9:139632618-139637411	ctrl	dox	OK	0.0619736	1.79316	4.85471	3.42222	0.0035	0.026261	yes	4.64692
ANO1	ANO1	ANO1	chr11:69924407-70035652	ctrl	dox	OK	0.0242249	0.844523	5.12357	2.96797	0.0021	0.0176772	yes	4.642
PDZD7	PDZD7	PDZD7	chr10:102756863-102790914	ctrl	dox	OK	0.313251	8.05076	4.68373	1.79566	0.00225	0.0185998	yes	4.64019
TBC1D28	TBC1D28	TBC1D28	chr17:18538841-18547740	ctrl	dox	OK	0	0.238969	inf	#NAME?	5e-05	0.000758876	yes	4.63789
SSTR3	SSTR3	SSTR3	chr22:37600276-37608416	ctrl	dox	OK	0	0.23878	inf	#NAME?	5e-05	0.000758876	yes	4.6368
NFATC4	NFATC4	NFATC4	chr14:24836116-24848811	ctrl	dox	OK	0.0643204	1.834	4.83357	4.27698	5e-05	0.000758876	yes	4.63294
SELM	SELM	SELM	chr22:31500762-31503551	ctrl	dox	OK	0.500549	12.6314	4.65737	4.45649	5e-05	0.000758876	yes	4.62996
CST1	CST1	CST1	chr20:23728189-23731574	ctrl	dox	OK	0.313299	7.90775	4.65766	3.39053	0.00105	0.0100871	yes	4.61415
SLC6A3	SLC6A3	SLC6A3	chr5:1392904-1445543	ctrl	dox	OK	0	0.234473	inf	#NAME?	5e-05	0.000758876	yes	4.6116
ATP2B3	ATP2B3	ATP2B3	chrX:152801579-152848387	ctrl	dox	OK	0	0.234381	inf	#NAME?	5e-05	0.000758876	yes	4.61106
CORO2B	CORO2B	CORO2B	chr15:68871307-69020144	ctrl	dox	OK	0.140472	3.66211	4.70432	4.83876	5e-05	0.000758876	yes	4.60904
NPTX1	NPTX1	NPTX1	chr17:78440632-78450404	ctrl	dox	OK	0.044098	1.29502	4.87612	4.61224	5e-05	0.000758876	yes	4.59235
FAM167A	FAM167A	FAM167A	chr8:11197145-11324276	ctrl	dox	OK	0.237105	5.94322	4.64765	5.5567	5e-05	0.000758876	yes	4.59047
IGLL5	IGLL5	IGLL5	chr22:23229959-23238013	ctrl	dox	OK	0	0.229194	inf	#NAME?	5e-05	0.000758876	yes	4.58011
RASL12	RASL12	RASL12	chr15:65337707-65360388	ctrl	dox	OK	0.157925	3.99507	4.66091	4.6244	5e-05	0.000758876	yes	4.57594
NACAD	NACAD	NACAD	chr7:45120035-45128493	ctrl	dox	OK	0.0211284	0.729008	5.10868	4.00586	0.00445	0.0315311	yes	4.56929
KRT86	KRT86	KRT86	chr12:52695648-52702947	ctrl	dox	OK	4.23309	100.414	4.5681	9.42708	5e-05	0.000758876	yes	4.56485
EFCAB12	EFCAB12	EFCAB12	chr3:129120163-129147494	ctrl	dox	OK	0	0.224251	inf	#NAME?	5e-05	0.000758876	yes	4.54998
OPRL1	OPRL1	OPRL1	chr20:62711470-62731996	ctrl	dox	OK	0.625473	14.8116	4.56563	6.5037	5e-05	0.000758876	yes	4.54373
BSND	BSND	BSND	chr1:55464616-55474465	ctrl	dox	OK	0	0.22302	inf	#NAME?	5e-05	0.000758876	yes	4.54238
CHGA	CHGA	CHGA	chr14:93389444-93401638	ctrl	dox	OK	0.0487824	1.35847	4.79947	3.64341	0.00445	0.0315311	yes	4.54104
DES	DES	DES	chr2:220283098-220291461	ctrl	dox	OK	0.0717178	1.88485	4.71598	3.94637	0.0008	0.00807874	yes	4.53529
BHLHA15	BHLHA15	BHLHA15	chr7:97841565-97842271	ctrl	dox	OK	0.20924	5.05251	4.59377	3.6563	0.00215	0.0179634	yes	4.52927
MICALCL	MICALCL	MICALCL	chr11:12308446-12380691	ctrl	dox	OK	0.0524638	1.42678	4.7653	3.96044	0.0008	0.00807874	yes	4.52368
RGCC	RGCC	RGCC	chr13:42031541-42045013	ctrl	dox	OK	0.42043	9.81537	4.54511	4.2714	5e-05	0.000758876	yes	4.51266
OTOG	OTOG	OTOG	chr11:17568919-17667491	ctrl	dox	OK	0	0.217164	inf	#NAME?	5e-05	0.000758876	yes	4.50566
RORC	RORC	RORC	chr1:151778546-151804348	ctrl	dox	OK	0.0882713	2.21943	4.6521	4.51944	5e-05	0.000758876	yes	4.50376
NKX6-2	NKX6-2	NKX6-2	chr10:134598319-134599537	ctrl	dox	OK	0	0.216573	inf	#NAME?	5e-05	0.000758876	yes	4.5019
LINC00494	LINC00494	LINC00494	chr20:46988653-46999381	ctrl	dox	OK	0.0325313	0.947442	4.86414	3.58866	0.00425	0.0304504	yes	4.49259
TCEAL2	TCEAL2	TCEAL2	chrX:101380659-101382684	ctrl	dox	OK	0.101405	2.49116	4.61862	3.01989	0.0073	0.0466945	yes	4.48871
AQP5	AQP5	AQP5	chr12:50344523-50359465	ctrl	dox	OK	0.130734	3.14944	4.59038	4.03028	0.0001	0.00140493	yes	4.48863
GNAT1	GNAT1	GNAT1	chr3:50229042-50235129	ctrl	dox	OK	0	0.214207	inf	#NAME?	5e-05	0.000758876	yes	4.48676
CD19	CD19	CD19	chr16:28943259-28950668	ctrl	dox	OK	0	0.214179	inf	#NAME?	5e-05	0.000758876	yes	4.48658
CRYAA	CRYAA	CRYAA	chr21:44589117-44592920	ctrl	dox	OK	0	0.213752	inf	#NAME?	5e-05	0.000758876	yes	4.48383
C1orf64	C1orf64	C1orf64	chr1:16330730-16333184	ctrl	dox	OK	0	0.213339	inf	#NAME?	0.0002	0.00255224	yes	4.48116
OR5AU1	OR5AU1	OR5AU1	chr14:21623095-21624184	ctrl	dox	OK	0	0.212397	inf	#NAME?	0.00085	0.00846464	yes	4.47507
ARC	ARC	ARC	chr8:143692404-143695833	ctrl	dox	OK	0.357225	8.11944	4.50648	5.77966	5e-05	0.000758876	yes	4.46842
CRYBB1	CRYBB1	CRYBB1	chr22:26995361-27013991	ctrl	dox	OK	0	0.210998	inf	#NAME?	0.00105	0.0100871	yes	4.46596
MPZ	MPZ	MPZ	chr1:161274524-161279762	ctrl	dox	OK	8.80027	193.348	4.45751	10.2914	5e-05	0.000758876	yes	4.45594
BAI1	BAI1	BAI1	chr8:143545376-143626368	ctrl	dox	OK	0.0354766	0.980818	4.78904	3.8757	0.0004	0.00458914	yes	4.44542
CLDN19	CLDN19	CLDN19	chr1:43198763-43205925	ctrl	dox	OK	0	0.207585	inf	#NAME?	5e-05	0.000758876	yes	4.44351
IGFBP4	IGFBP4	IGFBP4	chr17:38599675-38613982	ctrl	dox	OK	0.301552	6.7514	4.48471	4.35322	5e-05	0.000758876	yes	4.43978
CNBD2	CNBD2	CNBD2	chr20:34556528-34618622	ctrl	dox	OK	0	0.205991	inf	#NAME?	5e-05	0.000758876	yes	4.4329
CNPY1	CNPY1	CNPY1	chr7:155293952-155326539	ctrl	dox	OK	0	0.205627	inf	#NAME?	5e-05	0.000758876	yes	4.43047
MYL4	MYL4	MYL4	chr17:45286427-45301045	ctrl	dox	OK	0.163664	3.73077	4.51066	3.03407	0.0009	0.00885452	yes	4.42896
ANKRD65	ANKRD65	ANKRD65	chr1:1353799-1356824	ctrl	dox	OK	0	0.204971	inf	#NAME?	5e-05	0.000758876	yes	4.42607
ST6GALNAC1	ST6GALNAC1	ST6GALNAC1	chr17:74620837-74639920	ctrl	dox	OK	0.349892	7.5966	4.44037	5.34936	5e-05	0.000758876	yes	4.40162
PPP1R16B	PPP1R16B	PPP1R16B	chr20:37434347-37551667	ctrl	dox	OK	0.0429111	1.10755	4.68988	4.11992	5e-05	0.000758876	yes	4.40063
CAMSAP3	CAMSAP3	CAMSAP3	chr19:7660787-7683196	ctrl	dox	OK	0.0261144	0.748996	4.84204	3.15345	0.00135	0.0123418	yes	4.39345
KIR2DL1	KIR2DL1	KIR2DL1	chr19:55280873-55295778	ctrl	dox	OK	0	0.199351	inf	#NAME?	0.0007	0.00729454	yes	4.38785
PROM2	PROM2	PROM2	chr2:95940200-95957055	ctrl	dox	OK	0.0576815	1.39853	4.59966	3.62459	5e-05	0.000758876	yes	4.37928
DHH	DHH	DHH	chr12:49483205-49488602	ctrl	dox	OK	0.153965	3.34562	4.4416	4.17445	5e-05	0.000758876	yes	4.35512
SCUBE3	SCUBE3	SCUBE3	chr6:35182189-35218609	ctrl	dox	OK	0.770703	15.8611	4.36318	7.32942	5e-05	0.000758876	yes	4.34548
ZNF488	ZNF488	ZNF488	chr10:48355088-48373866	ctrl	dox	OK	0.441405	9.16205	4.3755	5.79545	5e-05	0.000758876	yes	4.34475
FAM107A	FAM107A	FAM107A	chr3:58549838-58613337	ctrl	dox	OK	0.0374992	0.94664	4.65789	2.62136	0.0001	0.00140493	yes	4.332
CACNA1I	CACNA1I	CACNA1I	chr22:39966757-40085740	ctrl	dox	OK	0.0141753	0.475988	5.06947	4.03967	0.0003	0.00361996	yes	4.32931
LOC101928416	LOC101928416	LOC101928416	chr12:132906435-132908161	ctrl	dox	OK	0	0.189955	inf	#NAME?	0.0062	0.0410324	yes	4.3216
CMTM5	CMTM5	CMTM5	chr14:23846016-23848981	ctrl	dox	OK	0.6157	12.3253	4.32325	4.61557	5e-05	0.000758876	yes	4.30118
KLK10	KLK10	KLK10	chr19:51515999-51523431	ctrl	dox	OK	0	0.18698	inf	#NAME?	5e-05	0.000758876	yes	4.29998
TMEM8C	TMEM8C	TMEM8C	chr9:136379707-136390068	ctrl	dox	OK	0	0.185815	inf	#NAME?	0.00395	0.0287717	yes	4.29142
OBP2B	OBP2B	OBP2B	chr9:136080665-136084637	ctrl	dox	OK	0	0.184478	inf	#NAME?	5e-05	0.000758876	yes	4.28154
BHLHE23	BHLHE23	BHLHE23	chr20:61637330-61638387	ctrl	dox	OK	0	0.184053	inf	#NAME?	0.0001	0.00140493	yes	4.27838
POU3F1	POU3F1	POU3F1	chr1:38509522-38512450	ctrl	dox	OK	0.244387	4.9119	4.32904	5.24092	5e-05	0.000758876	yes	4.27412
NOS3	NOS3	NOS3	chr7:150688143-150721586	ctrl	dox	OK	0.0171275	0.513507	4.906	1.16833	0.0048	0.0335086	yes	4.27038
ZG16B	ZG16B	ZG16B	chr16:2880172-2882285	ctrl	dox	OK	0.482699	9.4561	4.29205	3.96883	0.00015	0.001995	yes	4.26399
CEACAM21	CEACAM21	CEACAM21	chr19:42055885-42093197	ctrl	dox	OK	0	0.181587	inf	#NAME?	5e-05	0.000758876	yes	4.25993
HNF4A	HNF4A	HNF4A	chr20:42984440-43061485	ctrl	dox	OK	0	0.181476	inf	#NAME?	5e-05	0.000758876	yes	4.25909
PTAFR	PTAFR	PTAFR	chr1:28473676-28520447	ctrl	dox	OK	0.124598	2.56676	4.3646	4.617	5e-05	0.000758876	yes	4.25883
B3GNT7	B3GNT7	B3GNT7	chr2:232260334-232265875	ctrl	dox	OK	2.23802	42.3302	4.24139	8.39017	5e-05	0.000758876	yes	4.2353
CLCNKA	CLCNKA	CLCNKA	chr1:16348485-16360545	ctrl	dox	OK	0	0.173806	inf	#NAME?	5e-05	0.000758876	yes	4.20011
AQP1	AQP1	AQP1	chr7:30951414-30965131	ctrl	dox	OK	1.54569	28.5444	4.20688	6.25456	5e-05	0.000758876	yes	4.19809
CGB7	CGB7	CGB7	chr19:49557530-49558997	ctrl	dox	OK	0	0.172727	inf	#NAME?	0.00165	0.0145011	yes	4.19162
KCNF1	KCNF1	KCNF1	chr2:11052062-11054351	ctrl	dox	OK	0	0.172581	inf	#NAME?	5e-05	0.000758876	yes	4.19046
IFNA17	IFNA17	IFNA17	chr9:21227241-21228221	ctrl	dox	OK	0	0.171759	inf	#NAME?	0.00255	0.0206147	yes	4.18395
MDK	MDK	MDK	chr11:46402333-46405387	ctrl	dox	OK	3.055	55.6743	4.18777	6.38365	5e-05	0.000758876	yes	4.18331
LHX5	LHX5	LHX5	chr12:113900693-113909877	ctrl	dox	OK	0	0.170146	inf	#NAME?	5e-05	0.000758876	yes	4.17109
TRABD2B	TRABD2B	TRABD2B	chr1:48226199-48462562	ctrl	dox	OK	0.0474157	1.02248	4.43057	4.46613	5e-05	0.000758876	yes	4.16852
KLK6	KLK6	KLK6	chr19:51461886-51472929	ctrl	dox	OK	1.26108	22.8375	4.17867	5.86277	5e-05	0.000758876	yes	4.16791
HS3ST6	HS3ST6	HS3ST6	chr16:1961464-1968231	ctrl	dox	OK	0	0.169427	inf	#NAME?	0.00055	0.00600319	yes	4.16533
SLC4A1	SLC4A1	SLC4A1	chr17:42325757-42345502	ctrl	dox	OK	0	0.169404	inf	#NAME?	5e-05	0.000758876	yes	4.16514
LINC00160	LINC00160	LINC00160	chr21:36096104-36109479	ctrl	dox	OK	0	0.169404	inf	#NAME?	0.00645	0.0422355	yes	4.16514
LINC00323	LINC00323	LINC00323	chr21:42513426-42519991	ctrl	dox	OK	0	0.169273	inf	#NAME?	5e-05	0.000758876	yes	4.16409
SCD5	SCD5	SCD5	chr4:83550689-83720010	ctrl	dox	OK	0.374383	6.83799	4.19098	4.80867	5e-05	0.000758876	yes	4.15506
CYP11A1	CYP11A1	CYP11A1	chr15:74630102-74660081	ctrl	dox	OK	0.115411	2.21469	4.26226	3.46963	0.0004	0.00458914	yes	4.14887
OR7E47P	OR7E47P	OR7E47P	chr12:52473479-52502103	ctrl	dox	OK	0	0.166163	inf	#NAME?	0.00015	0.001995	yes	4.13884
TMEM63C	TMEM63C	TMEM63C	chr14:77648101-77725838	ctrl	dox	OK	0	0.166129	inf	#NAME?	5e-05	0.000758876	yes	4.13856
INMT	INMT	INMT	chr7:30791750-30932002	ctrl	dox	OK	9.4884	166.856	4.13629	8.51264	5e-05	0.000758876	yes	4.13486
FZD8	FZD8	FZD8	chr10:35927176-35930362	ctrl	dox	OK	0	0.165599	inf	#NAME?	5e-05	0.000758876	yes	4.13421
JPH3	JPH3	JPH3	chr16:87635440-87731761	ctrl	dox	OK	0.0914858	1.76662	4.2713	2.75102	5e-05	0.000758876	yes	4.12979
SEPT5-GP1BB	SEPT5-GP1BB	SEPT5-GP1BB	chr22:19701986-19712297	ctrl	dox	OK	0.896404	15.816	4.14109	5.59959	5e-05	0.000758876	yes	4.126
FAM157A	FAM157A	FAM157A	chr3:197879236-197907728	ctrl	dox	OK	0	0.164366	inf	#NAME?	5e-05	0.000758876	yes	4.12405
SLC16A3	SLC16A3	SLC16A3	chr17:80186281-80197375	ctrl	dox	OK	10.456	182.399	4.12469	9.77442	5e-05	0.000758876	yes	4.12339
AATK	AATK	AATK	chr17:79008946-79156964	ctrl	dox	OK	0.550628	9.72174	4.14206	3.90741	5e-05	0.000758876	yes	4.11758
LCN6	LCN6	LCN6	chr9:139638468-139644363	ctrl	dox	OK	0	0.163099	inf	#NAME?	0.00765	0.0485699	yes	4.11353
SERPINA4	SERPINA4	SERPINA4	chr14:95027756-95036250	ctrl	dox	OK	0	0.162093	inf	#NAME?	5e-05	0.000758876	yes	4.10512
TMPRSS2	TMPRSS2	TMPRSS2	chr21:42836477-42880085	ctrl	dox	OK	0.154025	2.81205	4.19039	4.33786	5e-05	0.000758876	yes	4.10476
FAAH	FAAH	FAAH	chr1:46859938-46879520	ctrl	dox	OK	0.130318	2.39017	4.19701	3.97661	0.0001	0.00140493	yes	4.09636
GPX7	GPX7	GPX7	chr1:53068042-53074723	ctrl	dox	OK	0.0526609	1.05549	4.32503	2.07073	0.0026	0.0209435	yes	4.08781
FBP1	FBP1	FBP1	chr9:97365420-97402531	ctrl	dox	OK	0	0.159373	inf	#NAME?	5e-05	0.000758876	yes	4.08213
SPATA31A6	SPATA31A6	SPATA31A6	chr9:43624501-43630730	ctrl	dox	OK	0.0326617	0.712247	4.44671	3.64887	0.00065	0.00685708	yes	4.08148
SEZ6L	SEZ6L	SEZ6L	chr22:26565439-26779563	ctrl	dox	OK	0	0.159116	inf	#NAME?	5e-05	0.000758876	yes	4.07994
LINC01107	LINC01107	LINC01107	chr2:239419330-239464140	ctrl	dox	OK	0	0.157099	inf	#NAME?	5e-05	0.000758876	yes	4.06263
CXCL6	CXCL6	CXCL6	chr4:74702272-74704477	ctrl	dox	OK	0	0.154969	inf	#NAME?	0.0015	0.0134059	yes	4.04412
CAMK2A	CAMK2A	CAMK2A	chr5:149599053-149669403	ctrl	dox	OK	0.0265318	0.588048	4.47014	3.42822	0.0018	0.0155529	yes	4.03304
CES5A	CES5A	CES5A	chr16:55880065-55989943	ctrl	dox	OK	0	0.153568	inf	#NAME?	5e-05	0.000758876	yes	4.03182
VILL	VILL	VILL	chr3:38035077-38048676	ctrl	dox	OK	2.34279	38.3606	4.03333	7.73114	5e-05	0.000758876	yes	4.02756
FOXS1	FOXS1	FOXS1	chr20:30432102-30433420	ctrl	dox	OK	0	0.152637	inf	#NAME?	5e-05	0.000758876	yes	4.02358
KHDRBS2	KHDRBS2	KHDRBS2	chr6:62389864-62996100	ctrl	dox	OK	0	0.151995	inf	#NAME?	0.0001	0.00140493	yes	4.01788
FAM83A	FAM83A	FAM83A	chr8:124191286-124222319	ctrl	dox	OK	0	0.151895	inf	#NAME?	5e-05	0.000758876	yes	4.01699
LCN15	LCN15	LCN15	chr9:139654085-139658965	ctrl	dox	OK	0	0.150846	inf	#NAME?	0.00335	0.0254331	yes	4.00761
CLEC17A	CLEC17A	CLEC17A	chr19:14693895-14721956	ctrl	dox	OK	0.0582309	1.0836	4.2179	2.2648	0.00015	0.001995	yes	4.00252
GPX3	GPX3	GPX3	chr5:150399998-150408554	ctrl	dox	OK	0.142741	2.43195	4.09064	3.5774	0.0002	0.00255224	yes	3.99887
CHRM4	CHRM4	CHRM4	chr11:46406639-46408107	ctrl	dox	OK	0.161359	2.6816	4.05475	3.30598	0.0009	0.00885452	yes	3.97337
TNFRSF25	TNFRSF25	TNFRSF25	chr1:6521213-6580121	ctrl	dox	OK	0.103273	1.76909	4.09847	1.39975	0.004	0.0290534	yes	3.97326
KRT16P1	KRT16P1	KRT16P1	chr17:18343221-18346208	ctrl	dox	OK	0	0.146534	inf	#NAME?	0.0001	0.00140493	yes	3.9684
ASB2	ASB2	ASB2	chr14:94400498-94443076	ctrl	dox	OK	1.99283	31.199	3.96861	6.88605	5e-05	0.000758876	yes	3.96185
GYG2P1	GYG2P1	GYG2P1	chrY:14517914-14533389	ctrl	dox	OK	0	0.145695	inf	#NAME?	0.00645	0.0422355	yes	3.96065
PTPN6	PTPN6	PTPN6	chr12:7055739-7070479	ctrl	dox	OK	0.113579	1.9127	4.07385	3.72863	5e-05	0.000758876	yes	3.95963
FGF8	FGF8	FGF8	chr10:103529886-103540126	ctrl	dox	OK	0	0.144943	inf	#NAME?	5e-05	0.000758876	yes	3.95367
RBP4	RBP4	RBP4	chr10:95351592-95360993	ctrl	dox	OK	0	0.143902	inf	#NAME?	0.00195	0.0166092	yes	3.94394
GDF5	GDF5	GDF5	chr20:34021144-34025970	ctrl	dox	OK	0	0.143355	inf	#NAME?	5e-05	0.000758876	yes	3.9388
COL6A2	COL6A2	COL6A2	chr21:47518032-47552763	ctrl	dox	OK	0.84932	13.1573	3.95342	6.28517	5e-05	0.000758876	yes	3.93762
CD300C	CD300C	CD300C	chr17:72537204-72542310	ctrl	dox	OK	0.546818	8.49468	3.95743	4.04327	5e-05	0.000758876	yes	3.93298
SELV	SELV	SELV	chr19:40005752-40011326	ctrl	dox	OK	0	0.142572	inf	#NAME?	5e-05	0.000758876	yes	3.93142
WNT9A	WNT9A	WNT9A	chr1:228109164-228135676	ctrl	dox	OK	3.37598	51.4532	3.92988	6.52831	5e-05	0.000758876	yes	3.9259
GFI1B	GFI1B	GFI1B	chr9:135854097-135867084	ctrl	dox	OK	0	0.14197	inf	#NAME?	5e-05	0.000758876	yes	3.92571
CLDN9	CLDN9	CLDN9	chr16:3062456-3064506	ctrl	dox	OK	0	0.141035	inf	#NAME?	5e-05	0.000758876	yes	3.91681
ACCSL	ACCSL	ACCSL	chr11:44069530-44081527	ctrl	dox	OK	0.147358	2.32967	3.98273	3.36819	0.0004	0.00458914	yes	3.89418
BPIFB2	BPIFB2	BPIFB2	chr20:31595383-31611515	ctrl	dox	OK	0	0.138543	inf	#NAME?	5e-05	0.000758876	yes	3.89281
CHRNB4	CHRNB4	CHRNB4	chr15:78916635-78933587	ctrl	dox	OK	0	0.13792	inf	#NAME?	5e-05	0.000758876	yes	3.88675
RND2	RND2	RND2	chr17:41177257-41184058	ctrl	dox	OK	0.0350635	0.654918	4.22327	2.96348	0.0042	0.0302006	yes	3.88315
GFRA2	GFRA2	GFRA2	chr8:21549529-21646346	ctrl	dox	OK	0	0.136658	inf	#NAME?	5e-05	0.000758876	yes	3.87438
PCP4L1	PCP4L1	PCP4L1	chr1:161228516-161255240	ctrl	dox	OK	0	0.136202	inf	#NAME?	0.00065	0.00685708	yes	3.86989
ITGA9	ITGA9	ITGA9	chr3:37493812-37903271	ctrl	dox	OK	0.181023	2.74255	3.92128	3.14059	0.00045	0.00505616	yes	3.84895
ASPG	ASPG	ASPG	chr14:104552022-104579046	ctrl	dox	OK	0	0.133538	inf	#NAME?	5e-05	0.000758876	yes	3.84336
N4BP3	N4BP3	N4BP3	chr5:177540555-177553107	ctrl	dox	OK	0.0964921	1.50861	3.96666	4.30345	5e-05	0.000758876	yes	3.83393
GIPR	GIPR	GIPR	chr19:46171501-46185717	ctrl	dox	OK	0.135086	2.05292	3.92573	3.631	0.00015	0.001995	yes	3.82971
LOC389641	LOC389641	LOC389641	chr8:23082733-23088439	ctrl	dox	OK	0	0.132049	inf	#NAME?	0.00015	0.001995	yes	3.82832
KRT85	KRT85	KRT85	chr12:52753789-52761309	ctrl	dox	OK	0	0.130351	inf	#NAME?	5e-05	0.000758876	yes	3.81097
C1orf94	C1orf94	C1orf94	chr1:34632483-34684731	ctrl	dox	OK	0	0.130145	inf	#NAME?	5e-05	0.000758876	yes	3.80885
SEMA7A	SEMA7A	SEMA7A	chr15:74701629-74726299	ctrl	dox	OK	4.29875	60.2709	3.80947	8.7043	5e-05	0.000758876	yes	3.80636
GPR31	GPR31	GPR31	chr6:167570359-167571319	ctrl	dox	OK	0	0.129898	inf	#NAME?	0.00345	0.0259618	yes	3.8063
S100P	S100P	S100P	chr4:6695565-6698897	ctrl	dox	OK	0.893266	12.6026	3.81849	3.52144	0.0001	0.00140493	yes	3.80357
ZNF185	ZNF185	ZNF185	chrX:152082985-152142025	ctrl	dox	OK	1.13537	15.9798	3.81501	5.84546	5e-05	0.000758876	yes	3.80327
ADAM20P1	ADAM20P1	ADAM20P1	chr14:70935595-70950473	ctrl	dox	OK	0	0.129328	inf	#NAME?	5e-05	0.000758876	yes	3.80041
ADCY8	ADCY8	ADCY8	chr8:131792546-132052835	ctrl	dox	OK	0	0.129325	inf	#NAME?	5e-05	0.000758876	yes	3.80038
KNDC1	KNDC1	KNDC1	chr10:134973970-135039916	ctrl	dox	OK	0.0122063	0.298635	4.61269	2.97078	0.00795	0.0498402	yes	3.79686
PPP4R4	PPP4R4	PPP4R4	chr14:94640648-94746072	ctrl	dox	OK	2.22493	31.0182	3.80128	4.68348	5e-05	0.000758876	yes	3.79528
LRRC10B	LRRC10B	LRRC10B	chr11:61276271-61278490	ctrl	dox	OK	0	0.128699	inf	#NAME?	5e-05	0.000758876	yes	3.79389
LRRC14B	LRRC14B	LRRC14B	chr5:191625-195468	ctrl	dox	OK	0	0.128524	inf	#NAME?	0.00015	0.001995	yes	3.79206
MEFV	MEFV	MEFV	chr16:3292027-3306627	ctrl	dox	OK	0.0348943	0.599756	4.10331	2.73262	0.00175	0.0152014	yes	3.76363
UBE2E4P	UBE2E4P	UBE2E4P	chrX:14262386-14263545	ctrl	dox	OK	0	0.125434	inf	#NAME?	0.00435	0.0309937	yes	3.75952
2016-09-05	2016-09-05	2016-09-05	chr22:19701986-19712297	ctrl	dox	OK	0.86852	11.8264	3.76731	3.4922	0.00045	0.00505616	yes	3.75201
GCGR	GCGR	GCGR	chr17:79762007-79771889	ctrl	dox	OK	0	0.124682	inf	#NAME?	5e-05	0.000758876	yes	3.75149
TTYH1	TTYH1	TTYH1	chr19:54926604-54947899	ctrl	dox	OK	0.097682	1.42592	3.86766	2.84073	0.00025	0.00312152	yes	3.73713
OR2T1	OR2T1	OR2T1	chr1:248569295-248570405	ctrl	dox	OK	0	0.122881	inf	#NAME?	0.0062	0.0410324	yes	3.73206
ACVRL1	ACVRL1	ACVRL1	chr12:52301201-52317145	ctrl	dox	OK	0.264528	3.63182	3.7792	4.56257	5e-05	0.000758876	yes	3.72963
ADORA3	ADORA3	ADORA3	chr1:112025969-112106597	ctrl	dox	OK	0.192394	2.66372	3.79131	3.00478	0.00035	0.00411812	yes	3.72361
GGTA1P	GGTA1P	GGTA1P	chr9:124217318-124262306	ctrl	dox	OK	0	0.121397	inf	#NAME?	0.00015	0.001995	yes	3.71586
ACTL7B	ACTL7B	ACTL7B	chr9:111616868-111618275	ctrl	dox	OK	0	0.120999	inf	#NAME?	0.00085	0.00846464	yes	3.71148
SFN	SFN	SFN	chr1:27189632-27190947	ctrl	dox	OK	0.332251	4.43589	3.73888	3.38897	0.00025	0.00312152	yes	3.69935
PLEKHG5	PLEKHG5	PLEKHG5	chr1:6521213-6580121	ctrl	dox	OK	0.330757	4.40185	3.73427	4.87608	5e-05	0.000758876	yes	3.69457
FABP3	FABP3	FABP3	chr1:31838099-31845923	ctrl	dox	OK	0.343256	4.55646	3.73056	3.57622	0.0001	0.00140493	yes	3.69229
COX6B2	COX6B2	COX6B2	chr19:55861069-55866182	ctrl	dox	OK	0.122843	1.70371	3.79379	3.26286	0.0002	0.00255224	yes	3.68933
COL11A2	COL11A2	COL11A2	chr6_ssto_hap7:4610635-4637414	ctrl	dox	OK	7.43296	95.8876	3.68934	8.1377	5e-05	0.000758876	yes	3.68755
CDH3	CDH3	CDH3	chr16:68678150-68732957	ctrl	dox	OK	0.115682	1.60767	3.79673	4.1237	5e-05	0.000758876	yes	3.68607
CALML5	CALML5	CALML5	chr10:5540657-5541533	ctrl	dox	OK	0	0.118136	inf	#NAME?	0.00435	0.0309938	yes	3.6796
MRVI1	MRVI1	MRVI1	chr11:10562782-10715535	ctrl	dox	OK	0.036167	0.580439	4.0044	2.90109	5e-05	0.000758876	yes	3.67685
KCNQ1DN	KCNQ1DN	KCNQ1DN	chr11:2891262-2893336	ctrl	dox	OK	0	0.11697	inf	#NAME?	0.00115	0.0108276	yes	3.66642
OLFM1	OLFM1	OLFM1	chr9:137967088-138013030	ctrl	dox	OK	0	0.116556	inf	#NAME?	5e-05	0.000758876	yes	3.6617
SP6	SP6	SP6	chr17:45922279-45933240	ctrl	dox	OK	0.082754	1.16202	3.81167	3.15407	0.00025	0.00312152	yes	3.65944
SLC28A3	SLC28A3	SLC28A3	chr9:86890764-86983413	ctrl	dox	OK	0.1708	2.27441	3.73511	4.18557	5e-05	0.000758876	yes	3.65936
FAM198A	FAM198A	FAM198A	chr3:43020758-43099207	ctrl	dox	OK	0.352843	4.5732	3.69611	4.70116	5e-05	0.000758876	yes	3.65894
LINC01002	LINC01002	LINC01002	chr19:197015-202209	ctrl	dox	OK	0	0.115828	inf	#NAME?	5e-05	0.000758876	yes	3.65338
C1orf210	C1orf210	C1orf210	chr1:43747556-43751288	ctrl	dox	OK	0	0.115604	inf	#NAME?	0.00035	0.00411812	yes	3.65081
MRPL23-AS1	MRPL23-AS1	MRPL23-AS1	chr11:2004438-2011150	ctrl	dox	OK	0	0.114638	inf	#NAME?	5e-05	0.000758876	yes	3.63967
ALDH2	ALDH2	ALDH2	chr12:112204690-112247789	ctrl	dox	OK	0	0.11425	inf	#NAME?	5e-05	0.000758876	yes	3.63517
NRARP	NRARP	NRARP	chr9:140194082-140196703	ctrl	dox	OK	0.0971456	1.31166	3.7551	3.16125	0.0004	0.00458914	yes	3.62471
FCGR1B	FCGR1B	FCGR1B	chr1:120926127-120935944	ctrl	dox	OK	0	0.112938	inf	#NAME?	5e-05	0.000758876	yes	3.61986
PTGES	PTGES	PTGES	chr9:132500614-132515344	ctrl	dox	OK	1.50233	18.5233	3.62407	5.31134	5e-05	0.000758876	yes	3.61527
KRT16	KRT16	KRT16	chr17:39766030-39769079	ctrl	dox	OK	0.221399	2.80092	3.66118	3.8306	5e-05	0.000758876	yes	3.60259
HYAL1	HYAL1	HYAL1	chr3:50337319-50349812	ctrl	dox	OK	0.486424	6.01293	3.62778	4.1641	5e-05	0.000758876	yes	3.60082
LRRC32	LRRC32	LRRC32	chr11:76368567-76381791	ctrl	dox	OK	0	0.110888	inf	#NAME?	5e-05	0.000758876	yes	3.5956
DAO	DAO	DAO	chr12:109273856-109294710	ctrl	dox	OK	0	0.110682	inf	#NAME?	0.0003	0.00361996	yes	3.59314
ADAM8	ADAM8	ADAM8	chr10:135075919-135090407	ctrl	dox	OK	0.192976	2.4395	3.6601	4.20455	5e-05	0.000758876	yes	3.59311
ENTPD2	ENTPD2	ENTPD2	chr9:139942550-139948503	ctrl	dox	OK	0	0.110601	inf	#NAME?	5e-05	0.000758876	yes	3.59217
FAM90A1	FAM90A1	FAM90A1	chr12:8373855-8380214	ctrl	dox	OK	0.0579256	0.804688	3.79616	3.12406	0.00085	0.00846464	yes	3.58422
KIF21B	KIF21B	KIF21B	chr1:200938513-200992828	ctrl	dox	OK	0.14024	1.79087	3.67469	4.76227	5e-05	0.000758876	yes	3.58335
IRGC	IRGC	IRGC	chr19:44220213-44224169	ctrl	dox	OK	0	0.109781	inf	#NAME?	5e-05	0.000758876	yes	3.58233
CHD5	CHD5	CHD5	chr1:6161846-6240194	ctrl	dox	OK	0.0386455	0.570946	3.88498	4.06415	5e-05	0.000758876	yes	3.57803
SLC5A9	SLC5A9	SLC5A9	chr1:48688356-48714316	ctrl	dox	OK	0.33926	4.15979	3.61605	4.43556	5e-05	0.000758876	yes	3.5776
TCEAL6	TCEAL6	TCEAL6	chrX:101394932-101397388	ctrl	dox	OK	0	0.109106	inf	#NAME?	0.00555	0.0375897	yes	3.57417
MYRF	MYRF	MYRF	chr11:61520120-61555989	ctrl	dox	OK	0.252452	3.11365	3.62453	4.69441	5e-05	0.000758876	yes	3.57311
VWA2	VWA2	VWA2	chr10:115999012-116054259	ctrl	dox	OK	0.0534415	0.744078	3.79942	3.43326	0.0001	0.00140493	yes	3.57121
DLL1	DLL1	DLL1	chr6:170591293-170599697	ctrl	dox	OK	0.0736055	0.983721	3.74036	3.23322	0.00025	0.00312152	yes	3.57117
FAM71E2	FAM71E2	FAM71E2	chr19:55866275-55874620	ctrl	dox	OK	0	0.108857	inf	#NAME?	5e-05	0.000758876	yes	3.57115
FLJ26245	FLJ26245	FLJ26245	chr16:34980922-34990995	ctrl	dox	OK	0.0459998	0.655575	3.83306	1.85778	0.00265	0.0212225	yes	3.57111
LINC00163	LINC00163	LINC00163	chr21:46409778-46414001	ctrl	dox	OK	0	0.108853	inf	#NAME?	5e-05	0.000758876	yes	3.57111
FSTL3	FSTL3	FSTL3	chr19:676388-683392	ctrl	dox	OK	8.09918	96.2766	3.57134	8.23095	5e-05	0.000758876	yes	3.56971
SEMA3B	SEMA3B	SEMA3B	chr3:50304989-50314602	ctrl	dox	OK	8.42384	99.8424	3.5671	8.59207	5e-05	0.000758876	yes	3.56554
RAB11FIP4	RAB11FIP4	RAB11FIP4	chr17:29718641-29865232	ctrl	dox	OK	5.72572	67.5906	3.56129	9.09358	5e-05	0.000758876	yes	3.55899
MFNG	MFNG	MFNG	chr22:37865100-37882478	ctrl	dox	OK	0.102395	1.30813	3.67529	2.66374	0.00045	0.00505616	yes	3.55184
MST1R	MST1R	MST1R	chr3:49924435-49941306	ctrl	dox	OK	0.0942099	1.20274	3.67431	3.66913	0.0001	0.00140493	yes	3.54071
CLIC3	CLIC3	CLIC3	chr9:139889059-139891024	ctrl	dox	OK	0.301815	3.61631	3.58278	2.8806	0.0012	0.0112102	yes	3.53974
AMPD3	AMPD3	AMPD3	chr11:10471867-10529126	ctrl	dox	OK	0.267208	3.21237	3.5876	4.29078	5e-05	0.000758876	yes	3.53908
PALD1	PALD1	PALD1	chr10:72238563-72328206	ctrl	dox	OK	0.119136	1.48861	3.64328	3.96416	5e-05	0.000758876	yes	3.53666
FASLG	FASLG	FASLG	chr1:172628184-172636012	ctrl	dox	OK	0.0889423	1.13794	3.67741	2.61738	0.0023	0.0189695	yes	3.53632
SULF2	SULF2	SULF2	chr20:46286149-46415360	ctrl	dox	OK	0.0179567	0.314157	4.12889	1.99377	0.0023	0.0189695	yes	3.53543
LFNG	LFNG	LFNG	chr7:2552162-2568810	ctrl	dox	OK	1.39973	16.3288	3.54419	5.06571	5e-05	0.000758876	yes	3.53481
RPL3L	RPL3L	RPL3L	chr16:1994579-2004679	ctrl	dox	OK	0	0.105686	inf	#NAME?	0.0004	0.00458914	yes	3.53214
SERPINA9	SERPINA9	SERPINA9	chr14:94929057-94942670	ctrl	dox	OK	0	0.105551	inf	#NAME?	5e-05	0.000758876	yes	3.53046
SYT3	SYT3	SYT3	chr19:51125233-51143092	ctrl	dox	OK	0.435103	5.11739	3.55598	4.37644	5e-05	0.000758876	yes	3.52601
GLT1D1	GLT1D1	GLT1D1	chr12:129338080-129469509	ctrl	dox	OK	0	0.105192	inf	#NAME?	5e-05	0.000758876	yes	3.52597
CDC42EP1	CDC42EP1	CDC42EP1	chr22:37956470-37965410	ctrl	dox	OK	0.258597	3.08227	3.57521	3.94995	5e-05	0.000758876	yes	3.52515
TEKT2	TEKT2	TEKT2	chr1:36549675-36553876	ctrl	dox	OK	0	0.105022	inf	#NAME?	5e-05	0.000758876	yes	3.52384
MYLK2	MYLK2	MYLK2	chr20:30407177-30422500	ctrl	dox	OK	0.0769022	0.984524	3.67833	3.46613	0.0004	0.00458914	yes	3.51654
TLE2	TLE2	TLE2	chr19:2997635-3047633	ctrl	dox	OK	0.33166	3.89792	3.55493	4.24327	5e-05	0.000758876	yes	3.51577
DIAPH3-AS1	DIAPH3-AS1	DIAPH3-AS1	chr13:60239720-60738119	ctrl	dox	OK	0	0.104311	inf	#NAME?	0.0039	0.0284884	yes	3.51489
CLCNKB	CLCNKB	CLCNKB	chr1:16370230-16383821	ctrl	dox	OK	0.0931809	1.1673	3.64699	2.98959	0.00055	0.00600319	yes	3.51223
GBGT1	GBGT1	GBGT1	chr9:136028334-136039332	ctrl	dox	OK	0.0511627	0.687319	3.74782	1.70041	0.00015	0.001995	yes	3.51109
REM1	REM1	REM1	chr20:30063090-30072708	ctrl	dox	OK	0.0877971	1.10407	3.65251	3.00975	0.0013	0.0119639	yes	3.5099
H1F0	H1F0	H1F0	chr22:38201113-38203443	ctrl	dox	OK	0.239275	2.82722	3.56264	3.78913	5e-05	0.000758876	yes	3.50867
DUSP13	DUSP13	DUSP13	chr10:76854189-76868970	ctrl	dox	OK	0.571748	6.60974	3.53114	3.42291	5e-05	0.000758876	yes	3.50831
PLCH2	PLCH2	PLCH2	chr1:2407753-2436964	ctrl	dox	OK	0.0535036	0.71125	3.73265	3.44626	0.0004	0.00458914	yes	3.50559
NAGS	NAGS	NAGS	chr17:42082031-42086436	ctrl	dox	OK	0.958433	10.9852	3.51874	4.98271	5e-05	0.000758876	yes	3.50508
KCNN1	KCNN1	KCNN1	chr19:18062110-18109930	ctrl	dox	OK	0.0426786	0.588	3.78423	2.7197	0.00215	0.0179634	yes	3.50486
PRR18	PRR18	PRR18	chr6:166719167-166721871	ctrl	dox	OK	0	0.103386	inf	#NAME?	5e-05	0.000758876	yes	3.50317
DMBX1	DMBX1	DMBX1	chr1:46972667-46979886	ctrl	dox	OK	0	0.103314	inf	#NAME?	5e-05	0.000758876	yes	3.50225
SUSD4	SUSD4	SUSD4	chr1:223394160-223537544	ctrl	dox	OK	0.136577	1.65005	3.59473	3.07137	0.00025	0.00312152	yes	3.5015
NR5A1	NR5A1	NR5A1	chr9:127243514-127269699	ctrl	dox	OK	0	0.103106	inf	#NAME?	5e-05	0.000758876	yes	3.4996
HAPLN4	HAPLN4	HAPLN4	chr19:19366451-19373596	ctrl	dox	OK	0	0.102601	inf	#NAME?	5e-05	0.000758876	yes	3.49315
KCNK17	KCNK17	KCNK17	chr6:39266776-39282237	ctrl	dox	OK	0	0.102339	inf	#NAME?	0.0003	0.00361996	yes	3.48979
KCNQ2	KCNQ2	KCNQ2	chr20:62037541-62103993	ctrl	dox	OK	0	0.102197	inf	#NAME?	5e-05	0.000758876	yes	3.48796
APOC2	APOC2	APOC2	chr19:45445494-45452822	ctrl	dox	OK	0.826591	9.36948	3.50272	2.83672	0.0003	0.00361996	yes	3.48691
C12orf80	C12orf80	C12orf80	chr12:52599364-52604639	ctrl	dox	OK	0	0.102008	inf	#NAME?	0.0025	0.0203111	yes	3.48553
VASN	VASN	VASN	chr16:4390251-4466962	ctrl	dox	OK	1.00073	11.297	3.49682	2.92588	0.0003	0.00361996	yes	3.48375
MPO	MPO	MPO	chr17:56347216-56358296	ctrl	dox	OK	0	0.10153	inf	#NAME?	5e-05	0.000758876	yes	3.47936
TRIM48	TRIM48	TRIM48	chr11:55029657-55038595	ctrl	dox	OK	22.2403	247.985	3.47901	8.52087	5e-05	0.000758876	yes	3.47841
GFAP	GFAP	GFAP	chr17:42982993-42992920	ctrl	dox	OK	0.138457	1.63292	3.55995	3.53119	5e-05	0.000758876	yes	3.46815
CNN1	CNN1	CNN1	chr19:11649578-11661138	ctrl	dox	OK	0.102391	1.23179	3.58859	2.93281	0.00075	0.007695	yes	3.46582
C1QTNF5	C1QTNF5	C1QTNF5	chr11:119209643-119217383	ctrl	dox	OK	0	0.100387	inf	#NAME?	0.001	0.00966882	yes	3.4645
RNF183	RNF183	RNF183	chr9:116059372-116061320	ctrl	dox	OK	0	0.100029	inf	#NAME?	0.0029	0.0227378	yes	3.45981
FGD3	FGD3	FGD3	chr9:95709600-95798518	ctrl	dox	OK	0.266704	3.03227	3.50708	4.41714	5e-05	0.000758876	yes	3.45873
MYOM3	MYOM3	MYOM3	chr1:24382530-24438665	ctrl	dox	OK	0.0136414	0.249756	4.19446	2.61152	0.00775	0.0490314	yes	3.45777
CRB3	CRB3	CRB3	chr19:6464259-6481819	ctrl	dox	OK	0.116784	1.38151	3.56433	2.10454	0.0077	0.0487839	yes	3.45621
MOG	MOG	MOG	chr6_ssto_hap7:965313-980702	ctrl	dox	OK	0.428666	4.79445	3.48344	3.91905	5e-05	0.000758876	yes	3.45318
S100A5	S100A5	S100A5	chr1:153509622-153514241	ctrl	dox	OK	1.06628	11.7596	3.46318	3.66898	5e-05	0.000758876	yes	3.45094
COL23A1	COL23A1	COL23A1	chr5:177664616-178017556	ctrl	dox	OK	0	0.0990578	inf	#NAME?	5e-05	0.000758876	yes	3.44702
PRX	PRX	PRX	chr19:40899670-40919271	ctrl	dox	OK	0.709485	7.81228	3.4609	5.86288	5e-05	0.000758876	yes	3.44255
GPD1	GPD1	GPD1	chr12:50497601-50505103	ctrl	dox	OK	0.289215	3.24023	3.48588	4.20773	5e-05	0.000758876	yes	3.44129
FAM110C	FAM110C	FAM110C	chr2:38813-46588	ctrl	dox	OK	0	0.0982549	inf	#NAME?	5e-05	0.000758876	yes	3.43636
PCK1	PCK1	PCK1	chr20:56136136-56141513	ctrl	dox	OK	0	0.0982176	inf	#NAME?	5e-05	0.000758876	yes	3.43586
SLC12A7	SLC12A7	SLC12A7	chr5:1050488-1112172	ctrl	dox	OK	0.189023	2.14326	3.50318	4.28627	5e-05	0.000758876	yes	3.43552
SH2D1A	SH2D1A	SH2D1A	chrX:123480131-123507010	ctrl	dox	OK	0.0513433	0.651326	3.66513	2.22438	0.00435	0.0309938	yes	3.43038
PEAR1	PEAR1	PEAR1	chr1:156863522-156886226	ctrl	dox	OK	0.155404	1.76618	3.50654	3.52363	5e-05	0.000758876	yes	3.42471
SUSD3	SUSD3	SUSD3	chr9:95820969-95847418	ctrl	dox	OK	0	0.0973649	inf	#NAME?	5e-05	0.000758876	yes	3.42445
GPR17	GPR17	GPR17	chr2:128395995-128439360	ctrl	dox	OK	0.126379	1.44799	3.51822	2.64163	0.00015	0.001995	yes	3.41829
FFAR3	FFAR3	FFAR3	chr19:35849487-35851389	ctrl	dox	OK	0	0.0965066	inf	#NAME?	0.00065	0.00685708	yes	3.41287
ARHGAP9	ARHGAP9	ARHGAP9	chr12:57853917-57873633	ctrl	dox	OK	0.344499	3.75658	3.44685	3.10037	0.0012	0.0112102	yes	3.4094
HEYL	HEYL	HEYL	chr1:40089102-40105348	ctrl	dox	OK	0	0.0961223	inf	#NAME?	5e-05	0.000758876	yes	3.40766
H19	H19	H19	chr11:2016405-2019065	ctrl	dox	OK	3.87815	41.1085	3.406	6.89281	5e-05	0.000758876	yes	3.40263
LOC101927476	LOC101927476	LOC101927476	chrX:40122169-40146974	ctrl	dox	OK	0.233323	2.55571	3.45333	3.80822	5e-05	0.000758876	yes	3.39841
RHBDL3	RHBDL3	RHBDL3	chr17:30593194-30651680	ctrl	dox	OK	0.0495844	0.616124	3.63526	2.91647	0.00145	0.01305	yes	3.39344
CPLX1	CPLX1	CPLX1	chr4:778744-819945	ctrl	dox	OK	0.0726103	0.857496	3.56188	2.52904	0.00195	0.0166092	yes	3.39246
ITLN1	ITLN1	ITLN1	chr1:160846329-160854960	ctrl	dox	OK	0.107933	1.22407	3.50347	2.36877	0.0076	0.0483379	yes	3.38738
GRAMD2	GRAMD2	GRAMD2	chr15:72452146-72490136	ctrl	dox	OK	0.0917769	1.04052	3.50303	3.09819	0.0004	0.00458914	yes	3.36762
ARHGEF16	ARHGEF16	ARHGEF16	chr1:3371146-3397677	ctrl	dox	OK	0.29497	3.12147	3.40358	4.01075	5e-05	0.000758876	yes	3.3601
ZNF503-AS1	ZNF503-AS1	ZNF503-AS1	chr10:77056140-77121436	ctrl	dox	OK	0	0.0926482	inf	#NAME?	0.00015	0.001995	yes	3.35964
ALOXE3	ALOXE3	ALOXE3	chr17:7999217-8022234	ctrl	dox	OK	0	0.0926424	inf	#NAME?	5e-05	0.000758876	yes	3.35955
CDK18	CDK18	CDK18	chr1:205473683-205501921	ctrl	dox	OK	1.68616	17.3849	3.36602	5.79489	5e-05	0.000758876	yes	3.35832
RIPK3	RIPK3	RIPK3	chr14:24805226-24809242	ctrl	dox	OK	0	0.0924788	inf	#NAME?	0.0002	0.00255224	yes	3.35725
LINC00661	LINC00661	LINC00661	chr19:16126443-16138272	ctrl	dox	OK	0	0.0923113	inf	#NAME?	5e-05	0.000758876	yes	3.35489
CILP2	CILP2	CILP2	chr19:19649073-19657468	ctrl	dox	OK	0.0690537	0.798611	3.5317	3.20402	0.0002	0.00255224	yes	3.35454
HSPA6	HSPA6	HSPA6	chr1:161494035-161496687	ctrl	dox	OK	2.24097	22.9885	3.35872	6.06337	5e-05	0.000758876	yes	3.35292
SYNPO2L	SYNPO2L	SYNPO2L	chr10:75404638-75415863	ctrl	dox	OK	0.0755365	0.861327	3.51131	3.28668	5e-05	0.000758876	yes	3.3486
HTRA3	HTRA3	HTRA3	chr4:8271488-8308838	ctrl	dox	OK	0.0592861	0.694631	3.55048	2.46851	0.0044	0.0313003	yes	3.34623
SERPINA2	SERPINA2	SERPINA2	chr14:94829974-94833039	ctrl	dox	OK	0	0.0915768	inf	#NAME?	0.00185	0.0159084	yes	3.3445
IGFBP2	IGFBP2	IGFBP2	chr2:217498126-217529158	ctrl	dox	OK	3.7085	37.4614	3.3365	5.30866	5e-05	0.000758876	yes	3.333
AQP3	AQP3	AQP3	chr9:33441151-33447631	ctrl	dox	OK	0.438083	4.50493	3.36223	3.54702	5e-05	0.000758876	yes	3.33287
CISH	CISH	CISH	chr3:50643884-50649262	ctrl	dox	OK	0.142993	1.53029	3.41978	2.98072	0.0002	0.00255224	yes	3.33166
ANKRD36BP2	ANKRD36BP2	ANKRD36BP2	chr2:89065418-89106109	ctrl	dox	OK	0	0.0904827	inf	#NAME?	0.0013	0.0119639	yes	3.32888
TGM5	TGM5	TGM5	chr15:43524792-43559055	ctrl	dox	OK	0.137049	1.4662	3.41932	3.1408	5e-05	0.000758876	yes	3.32752
SYNGR3	SYNGR3	SYNGR3	chr16:2039945-2044276	ctrl	dox	OK	0.300979	3.1115	3.36988	3.62021	5e-05	0.000758876	yes	3.32735
FGR	FGR	FGR	chr1:27938800-27961727	ctrl	dox	OK	0	0.0903043	inf	#NAME?	5e-05	0.000758876	yes	3.32631
DUOX1	DUOX1	DUOX1	chr15:45422191-45457776	ctrl	dox	OK	0.0596404	0.687409	3.52681	3.26081	0.00035	0.00411812	yes	3.32401
DMKN	DMKN	DMKN	chr19:35988118-36004560	ctrl	dox	OK	0.247522	2.55983	3.37042	2.32746	5e-05	0.000758876	yes	3.31891
SGK2	SGK2	SGK2	chr20:42187634-42214273	ctrl	dox	OK	0.274311	2.82005	3.36184	3.34991	5e-05	0.000758876	yes	3.31529
RNF112	RNF112	RNF112	chr17:19314490-19320589	ctrl	dox	OK	0.0164623	0.253398	3.94417	1.88508	0.0026	0.0209435	yes	3.31523
AJAP1	AJAP1	AJAP1	chr1:4715104-4843851	ctrl	dox	OK	0	0.0895354	inf	#NAME?	5e-05	0.000758876	yes	3.31521
INSC	INSC	INSC	chr11:15133969-15268756	ctrl	dox	OK	0.219388	2.27075	3.37161	3.53408	5e-05	0.000758876	yes	3.31365
LEFTY1	LEFTY1	LEFTY1	chr1:226073981-226076846	ctrl	dox	OK	0	0.0893786	inf	#NAME?	0.0005	0.00552122	yes	3.31294
GHRHR	GHRHR	GHRHR	chr7:31003635-31019146	ctrl	dox	OK	0	0.0884994	inf	#NAME?	0.002	0.0169467	yes	3.30011
FBLN1	FBLN1	FBLN1	chr22:45898718-45997014	ctrl	dox	OK	0.191737	1.97617	3.3655	3.14365	5e-05	0.000758876	yes	3.29944
DCSTAMP	DCSTAMP	DCSTAMP	chr8:105352023-105368917	ctrl	dox	OK	0.289443	2.93368	3.34136	2.86472	0.0005	0.00552122	yes	3.29727
OTUD6A	OTUD6A	OTUD6A	chrX:69282340-69284029	ctrl	dox	OK	0.0809162	0.880881	3.44445	2.7328	0.00315	0.0242012	yes	3.29262
C6orf132	C6orf132	C6orf132	chr6:42068856-42110715	ctrl	dox	OK	0	0.0874567	inf	#NAME?	5e-05	0.000758876	yes	3.28476
PRDM1	PRDM1	PRDM1	chr6:106534194-106557814	ctrl	dox	OK	0.0710365	0.776797	3.45091	3.06162	0.0001	0.00140493	yes	3.27935
NCF2	NCF2	NCF2	chr1:183524696-183560056	ctrl	dox	OK	0.154662	1.57946	3.35224	2.97534	5e-05	0.000758876	yes	3.27096
HHIPL2	HHIPL2	HHIPL2	chr1:222695601-222721444	ctrl	dox	OK	0.573293	5.61865	3.29288	3.85263	5e-05	0.000758876	yes	3.2705
PAQR5	PAQR5	PAQR5	chr15:69591293-69699976	ctrl	dox	OK	0.770027	7.51204	3.28622	4.99345	5e-05	0.000758876	yes	3.26953
ST8SIA5	ST8SIA5	ST8SIA5	chr18:44259080-44337039	ctrl	dox	OK	0	0.0863135	inf	#NAME?	5e-05	0.000758876	yes	3.26774
TUBB2B	TUBB2B	TUBB2B	chr6:3224494-3227968	ctrl	dox	OK	7.52794	72.5112	3.26788	7.56795	5e-05	0.000758876	yes	3.26616
ACAP1	ACAP1	ACAP1	chr17:7239847-7254793	ctrl	dox	OK	0.148452	1.5142	3.35048	3.17194	0.00015	0.001995	yes	3.26593
TNFRSF10A	TNFRSF10A	TNFRSF10A	chr8:23048969-23082680	ctrl	dox	OK	0.203145	2.0359	3.32508	3.21723	0.0001	0.00140493	yes	3.26283
DNAI2	DNAI2	DNAI2	chr17:72270385-72311023	ctrl	dox	OK	0	0.0856263	inf	#NAME?	5e-05	0.000758876	yes	3.25741
RRAD	RRAD	RRAD	chr16:66955581-66959439	ctrl	dox	OK	0.88799	8.54505	3.26647	3.51319	5e-05	0.000758876	yes	3.25201
EMX1	EMX1	EMX1	chr2:73144603-73162020	ctrl	dox	OK	0	0.0850251	inf	#NAME?	5e-05	0.000758876	yes	3.24831
C3	C3	C3	chr19:6677845-6720662	ctrl	dox	OK	0.049574	0.555782	3.48686	2.60974	0.00015	0.001995	yes	3.24749
TRPV4	TRPV4	TRPV4	chr12:110220891-110271241	ctrl	dox	OK	2.79333	26.5345	3.24781	6.49061	5e-05	0.000758876	yes	3.2432
TTBK1	TTBK1	TTBK1	chr6:43211221-43255997	ctrl	dox	OK	0.00616211	0.142929	4.53573	1.93543	0.00265	0.0212225	yes	3.24217
SPARCL1	SPARCL1	SPARCL1	chr4:88394481-88450655	ctrl	dox	OK	0	0.0844649	inf	#NAME?	5e-05	0.000758876	yes	3.23978
TMC6	TMC6	TMC6	chr17:76108998-76139049	ctrl	dox	OK	3.66369	34.6808	3.24277	6.73498	5e-05	0.000758876	yes	3.23925
LOXHD1	LOXHD1	LOXHD1	chr18:44056934-44236996	ctrl	dox	OK	0	0.0842471	inf	#NAME?	5e-05	0.000758876	yes	3.23645
C1QTNF8	C1QTNF8	C1QTNF8	chr16:1138225-1146244	ctrl	dox	OK	0	0.0842255	inf	#NAME?	5e-05	0.000758876	yes	3.23612
KDM6B	KDM6B	KDM6B	chr17:7743234-7758118	ctrl	dox	OK	0.14655	1.46359	3.32005	3.95213	5e-05	0.000758876	yes	3.23464
EGR1	EGR1	EGR1	chr5:137801180-137805004	ctrl	dox	OK	0.640503	6.09034	3.24924	4.50617	5e-05	0.000758876	yes	3.22926
TREM1	TREM1	TREM1	chr6:41242998-41254457	ctrl	dox	OK	0	0.0829445	inf	#NAME?	0.00045	0.00505616	yes	3.21637
GPR133	GPR133	GPR133	chr12:131438451-131626008	ctrl	dox	OK	0.119095	1.1814	3.31031	3.63301	5e-05	0.000758876	yes	3.20615
NEURL3	NEURL3	NEURL3	chr2:97163379-97173846	ctrl	dox	OK	0.217505	2.08942	3.26398	2.92726	0.00015	0.001995	yes	3.20602
LOC389602	LOC389602	LOC389602	chr7:155755325-155759037	ctrl	dox	OK	0.144855	1.41767	3.29084	2.8409	0.0004	0.00458914	yes	3.20467
HAPLN2	HAPLN2	HAPLN2	chr1:156589085-156595517	ctrl	dox	OK	0	0.0820819	inf	#NAME?	0.001	0.00966882	yes	3.20292
LGR6	LGR6	LGR6	chr1:202163117-202288889	ctrl	dox	OK	0.10528	1.05016	3.31831	2.67786	0.0001	0.00140493	yes	3.20107
GAL3ST2	GAL3ST2	GAL3ST2	chr2:242716239-242743702	ctrl	dox	OK	0	0.0819542	inf	#NAME?	0.0012	0.0112102	yes	3.20092
PLB1	PLB1	PLB1	chr2:28718937-28866653	ctrl	dox	OK	0.692018	6.4298	3.21589	5.22451	5e-05	0.000758876	yes	3.19744
WFDC2	WFDC2	WFDC2	chr20:44098393-44110172	ctrl	dox	OK	1.37562	12.6775	3.20411	3.49619	5e-05	0.000758876	yes	3.1948
SMOC1	SMOC1	SMOC1	chr14:70346113-70499083	ctrl	dox	OK	0.461912	4.30951	3.22183	3.26535	0.00015	0.001995	yes	3.19428
MMRN2	MMRN2	MMRN2	chr10:88695297-88717425	ctrl	dox	OK	0.0515965	0.549235	3.41208	2.94382	0.0012	0.0112102	yes	3.18253
MPPED1	MPPED1	MPPED1	chr22:43808019-43902800	ctrl	dox	OK	0	0.080769	inf	#NAME?	0.0001	0.00140493	yes	3.1822
ITIH6	ITIH6	ITIH6	chrX:54775331-54824673	ctrl	dox	OK	2.32948	21.1608	3.18331	6.37157	5e-05	0.000758876	yes	3.17782
LINC00880	LINC00880	LINC00880	chr3:156799455-156840791	ctrl	dox	OK	0.1388	1.33611	3.26696	2.69574	0.00095	0.00928033	yes	3.17735
PERM1	PERM1	PERM1	chr1:910578-917497	ctrl	dox	OK	0.0281217	0.334527	3.57237	2.04944	0.00395	0.0287717	yes	3.17593
SLC6A19	SLC6A19	SLC6A19	chr5:1201709-1225230	ctrl	dox	OK	0	0.0802698	inf	#NAME?	5e-05	0.000758876	yes	3.17424
SLC22A11	SLC22A11	SLC22A11	chr11:64323097-64338999	ctrl	dox	OK	0	0.0801105	inf	#NAME?	5e-05	0.000758876	yes	3.1717
LCNL1	LCNL1	LCNL1	chr9:139877444-139880210	ctrl	dox	OK	0	0.0796885	inf	#NAME?	0.00185	0.0159084	yes	3.16492
EFNA1	EFNA1	EFNA1	chr1:155100348-155107386	ctrl	dox	OK	3.96583	35.6124	3.16668	5.13841	5e-05	0.000758876	yes	3.16346
CLIC6	CLIC6	CLIC6	chr21:36041687-36090519	ctrl	dox	OK	0.0376847	0.417016	3.46805	2.31941	0.0063	0.0415259	yes	3.16269
NUAK2	NUAK2	NUAK2	chr1:205271190-205290883	ctrl	dox	OK	0.358205	3.28028	3.19496	3.8599	5e-05	0.000758876	yes	3.15963
ITGAD	ITGAD	ITGAD	chr16:31404632-31437826	ctrl	dox	OK	0	0.0791634	inf	#NAME?	5e-05	0.000758876	yes	3.15645
RTL1	RTL1	RTL1	chr14:101346991-101351184	ctrl	dox	OK	0	0.0790784	inf	#NAME?	5e-05	0.000758876	yes	3.15508
WNK2	WNK2	WNK2	chr9:95947211-96108696	ctrl	dox	OK	0	0.0790484	inf	#NAME?	5e-05	0.000758876	yes	3.15459
TSKS	TSKS	TSKS	chr19:50243010-50266515	ctrl	dox	OK	0	0.0789559	inf	#NAME?	0.0004	0.00458914	yes	3.15309
LOC100505942	LOC100505942	LOC100505942	chr16:67551608-67562648	ctrl	dox	OK	0.127791	1.21412	3.24805	2.25251	0.0055	0.0373638	yes	3.15119
MYBPC3	MYBPC3	MYBPC3	chr11:47352956-47374253	ctrl	dox	OK	0	0.0788013	inf	#NAME?	5e-05	0.000758876	yes	3.15058
RAX2	RAX2	RAX2	chr19:3769088-3772219	ctrl	dox	OK	0	0.0787101	inf	#NAME?	0.00035	0.00411812	yes	3.1491
NGFR	NGFR	NGFR	chr17:47572654-47651426	ctrl	dox	OK	85.4708	756.511	3.14586	8.01161	5e-05	0.000758876	yes	3.14571
GAB4	GAB4	GAB4	chr22:17442826-17489112	ctrl	dox	OK	0	0.0783046	inf	#NAME?	5e-05	0.000758876	yes	3.14249
CALHM3	CALHM3	CALHM3	chr10:105232560-105238997	ctrl	dox	OK	0.115461	1.095	3.24545	2.5341	0.0033	0.0251279	yes	3.13874
KIAA1045	KIAA1045	KIAA1045	chr9:34958191-34982541	ctrl	dox	OK	0.0713733	0.704983	3.30413	3.35547	5e-05	0.000758876	yes	3.13528
LOC154449	LOC154449	LOC154449	chr6:170563421-170571657	ctrl	dox	OK	0	0.0777834	inf	#NAME?	0.00345	0.0259618	yes	3.13395
PTK6	PTK6	PTK6	chr20:62159775-62168723	ctrl	dox	OK	0.0389587	0.418987	3.42689	2.14571	0.00405	0.0293572	yes	3.1313
COL9A2	COL9A2	COL9A2	chr1:40766162-40782939	ctrl	dox	OK	2.82526	24.7119	3.12875	6.6177	5e-05	0.000758876	yes	3.12424
H1FOO	H1FOO	H1FOO	chr3:129262056-129270204	ctrl	dox	OK	0	0.0766825	inf	#NAME?	0.0027	0.0215556	yes	3.11574
FLNC	FLNC	FLNC	chr7:128470482-128499328	ctrl	dox	OK	1.52775	13.2859	3.12041	6.61188	5e-05	0.000758876	yes	3.11209
OSM	OSM	OSM	chr22:30658818-30662829	ctrl	dox	OK	0	0.0763747	inf	#NAME?	0.001	0.00966882	yes	3.11061
KCNK12	KCNK12	KCNK12	chr2:47747914-47797470	ctrl	dox	OK	0	0.0762954	inf	#NAME?	0.00645	0.0422355	yes	3.10928
KRT19	KRT19	KRT19	chr17:39679868-39684641	ctrl	dox	OK	1.01232	8.80603	3.12083	3.76115	5e-05	0.000758876	yes	3.10828
TINAGL1	TINAGL1	TINAGL1	chr1:32042085-32053287	ctrl	dox	OK	15.2912	131.769	3.10723	8.12941	5e-05	0.000758876	yes	3.1064
PDE4C	PDE4C	PDE4C	chr19:18318770-18359010	ctrl	dox	OK	0.0362631	0.387718	3.41843	2.50825	0.00015	0.001995	yes	3.10381
BIN2	BIN2	BIN2	chr12:51674821-51718464	ctrl	dox	OK	0.112611	1.0432	3.2116	2.3633	0.0003	0.00361996	yes	3.10262
SERPINF2	SERPINF2	SERPINF2	chr17:1646129-1658559	ctrl	dox	OK	0.0704954	0.681077	3.27222	2.03612	0.0006	0.00643164	yes	3.10187
KLHL4	KLHL4	KLHL4	chrX:86772714-86925050	ctrl	dox	OK	0.669942	5.82349	3.11977	3.41716	5e-05	0.000758876	yes	3.10088
MAP1LC3A	MAP1LC3A	MAP1LC3A	chr20:33134687-33148149	ctrl	dox	OK	1.08838	9.38711	3.1085	3.54772	5e-05	0.000758876	yes	3.09684
ZC3H12D	ZC3H12D	ZC3H12D	chr6:149768765-149806148	ctrl	dox	OK	0	0.075545	inf	#NAME?	5e-05	0.000758876	yes	3.09668
DKFZP434A062	DKFZP434A062	DKFZP434A062	chr9:139216997-139221779	ctrl	dox	OK	0	0.0755264	inf	#NAME?	5e-05	0.000758876	yes	3.09637
ALMS1P	ALMS1P	ALMS1P	chr2:73872045-73912694	ctrl	dox	OK	0.138441	1.25885	3.18476	2.69268	0.0008	0.00807874	yes	3.09556
BLK	BLK	BLK	chr8:11351520-11422108	ctrl	dox	OK	0.0991631	0.92055	3.21462	2.74386	0.00065	0.00685708	yes	3.0916
LOC442497	LOC442497	LOC442497	chr7:419390-422845	ctrl	dox	OK	0	0.0752225	inf	#NAME?	5e-05	0.000758876	yes	3.09123
MGAT3	MGAT3	MGAT3	chr22:39853324-39888199	ctrl	dox	OK	0.03799	0.398407	3.39055	2.58503	0.00105	0.0100871	yes	3.0892
P2RY2	P2RY2	P2RY2	chr11:72929342-72953472	ctrl	dox	OK	0.014889	0.201661	3.75961	2.25393	0.0025	0.0203111	yes	3.08818
VAV1	VAV1	VAV1	chr19:6772678-6857377	ctrl	dox	OK	0.0570688	0.559737	3.29397	2.38895	0.00065	0.00685708	yes	3.08658
DLX3	DLX3	DLX3	chr17:48067368-48072588	ctrl	dox	OK	0.105813	0.97334	3.20143	2.29014	0.00475	0.033263	yes	3.08589
PLK5	PLK5	PLK5	chr19:1524072-1535455	ctrl	dox	OK	0	0.0745732	inf	#NAME?	0.00055	0.00600319	yes	3.0802
SEMA3G	SEMA3G	SEMA3G	chr3:52467267-52479043	ctrl	dox	OK	0.319979	2.7798	3.11893	4.1211	5e-05	0.000758876	yes	3.07972
C1orf229	C1orf229	C1orf229	chr1:247273461-247275719	ctrl	dox	OK	0.0953234	0.87835	3.20389	2.6916	0.0016	0.0141308	yes	3.0763
DOK7	DOK7	DOK7	chr4:3465032-3496209	ctrl	dox	OK	0.385156	3.31765	3.10665	3.7565	5e-05	0.000758876	yes	3.07401
SLC5A8	SLC5A8	SLC5A8	chr12:101549993-101604016	ctrl	dox	OK	0	0.0741813	inf	#NAME?	0.005	0.0345954	yes	3.0735
NLRP13	NLRP13	NLRP13	chr19:56407310-56443702	ctrl	dox	OK	0	0.0740678	inf	#NAME?	0.00015	0.001995	yes	3.07155
SPON2	SPON2	SPON2	chr4:1160720-1202750	ctrl	dox	OK	13.4727	113.154	3.07018	5.40598	5e-05	0.000758876	yes	3.06923
LOC643441	LOC643441	LOC643441	chr1:113739403-113748875	ctrl	dox	OK	0	0.0739014	inf	#NAME?	0.00135	0.0123418	yes	3.06869
SPOCK2	SPOCK2	SPOCK2	chr10:73818791-73848790	ctrl	dox	OK	0.0598102	0.575176	3.26554	1.91498	0.00195	0.0166092	yes	3.06736
NINJ2	NINJ2	NINJ2	chr12:673461-772755	ctrl	dox	OK	1.41619	11.9341	3.07501	3.84627	5e-05	0.000758876	yes	3.06606
EPHA10	EPHA10	EPHA10	chr1:38181645-38230824	ctrl	dox	OK	0.0457946	0.456975	3.31887	2.16775	0.0023	0.0189695	yes	3.06515
SCNN1B	SCNN1B	SCNN1B	chr16:23313590-23392620	ctrl	dox	OK	0	0.0735552	inf	#NAME?	5e-05	0.000758876	yes	3.06273
PLLP	PLLP	PLLP	chr16:57290008-57318584	ctrl	dox	OK	4.85693	40.4855	3.05929	5.3399	5e-05	0.000758876	yes	3.05668
TFCP2L1	TFCP2L1	TFCP2L1	chr2:121974163-122042778	ctrl	dox	OK	0.064697	0.607149	3.23028	3.07403	5e-05	0.000758876	yes	3.0465
PNMA5	PNMA5	PNMA5	chrX:152157367-152162671	ctrl	dox	OK	0	0.0725722	inf	#NAME?	5e-05	0.000758876	yes	3.04566
TAS1R1	TAS1R1	TAS1R1	chr1:6615337-6639817	ctrl	dox	OK	0.14216	1.24403	3.12943	2.27194	0.00085	0.00846464	yes	3.04291
PTK7	PTK7	PTK7	chr6:43044005-43129458	ctrl	dox	OK	0.237305	2.01914	3.08893	3.73124	5e-05	0.000758876	yes	3.03651
GRM4	GRM4	GRM4	chr6:33986419-34123399	ctrl	dox	OK	0	0.0719015	inf	#NAME?	5e-05	0.000758876	yes	3.03389
VRTN	VRTN	VRTN	chr14:74815165-74826711	ctrl	dox	OK	0	0.0718581	inf	#NAME?	5e-05	0.000758876	yes	3.03313
COL2A1	COL2A1	COL2A1	chr12:48366747-48398285	ctrl	dox	OK	0.108552	0.958754	3.14277	3.42153	5e-05	0.000758876	yes	3.03061
ABCA1	ABCA1	ABCA1	chr9:107543283-107690527	ctrl	dox	OK	0.139209	1.20846	3.11785	3.86772	5e-05	0.000758876	yes	3.02965
CCDC60	CCDC60	CCDC60	chr12:119772516-119978852	ctrl	dox	OK	0	0.0714834	inf	#NAME?	0.0013	0.0119639	yes	3.02651
PDE6G	PDE6G	PDE6G	chr17:79617488-79623607	ctrl	dox	OK	0.150086	1.29328	3.10718	2.17331	0.0038	0.0279512	yes	3.02523
C15orf48	C15orf48	C15orf48	chr15:45722726-45725647	ctrl	dox	OK	7.49911	61.0557	3.02533	4.88041	5e-05	0.000758876	yes	3.02365
KRT7	KRT7	KRT7	chr12:52626953-52642709	ctrl	dox	OK	1.98637	16.0988	3.01875	4.61648	5e-05	0.000758876	yes	3.0124
FGFBP2	FGFBP2	FGFBP2	chr4:15961862-15964859	ctrl	dox	OK	1.09332	8.88192	3.02215	3.73947	5e-05	0.000758876	yes	3.01064
PKP3	PKP3	PKP3	chr11:394216-404908	ctrl	dox	OK	0.317947	2.62285	3.04428	3.60781	5e-05	0.000758876	yes	3.00509
FGF4	FGF4	FGF4	chr11:69587796-69590171	ctrl	dox	OK	0	0.0702631	inf	#NAME?	0.00645	0.0422355	yes	3.00474
LOC63930	LOC63930	LOC63930	chr20:61640734-61716423	ctrl	dox	OK	0	0.0701712	inf	#NAME?	5e-05	0.000758876	yes	3.00308
IRAK2	IRAK2	IRAK2	chr3:10206562-10285427	ctrl	dox	OK	1.06286	8.54014	3.00631	4.52325	5e-05	0.000758876	yes	2.99449
SCUBE1	SCUBE1	SCUBE1	chr22:43599228-43739394	ctrl	dox	OK	0.0353727	0.351189	3.31154	2.40925	0.00425	0.0304504	yes	2.99286
ADAMTSL2	ADAMTSL2	ADAMTSL2	chr9:136397285-136440641	ctrl	dox	OK	0.162783	1.36251	3.06525	3.25133	5e-05	0.000758876	yes	2.98978
ACHE	ACHE	ACHE	chr7:100487614-100493592	ctrl	dox	OK	0.157169	1.31113	3.06042	2.72532	5e-05	0.000758876	yes	2.98239
C10orf10	C10orf10	C10orf10	chr10:45455218-45490172	ctrl	dox	OK	1.6257	12.8727	2.98518	2.47241	0.0008	0.00807874	yes	2.97745
FBLIM1	FBLIM1	FBLIM1	chr1:16085254-16113084	ctrl	dox	OK	1.14748	9.10034	2.98745	3.92697	5e-05	0.000758876	yes	2.97652
GCKR	GCKR	GCKR	chr2:27719705-27746550	ctrl	dox	OK	0	0.0686471	inf	#NAME?	0.00245	0.0199772	yes	2.97539
KRT81	KRT81	KRT81	chr12:52679696-52685299	ctrl	dox	OK	5.74607	45.2116	2.97605	6.2375	5e-05	0.000758876	yes	2.97386
LAMA5	LAMA5	LAMA5	chr20:60884115-60942368	ctrl	dox	OK	0.113154	0.956571	3.07958	3.7496	5e-05	0.000758876	yes	2.97241
PDGFRB	PDGFRB	PDGFRB	chr5:149493401-149535422	ctrl	dox	OK	0.352985	2.83633	3.00635	4.23486	5e-05	0.000758876	yes	2.97112
CAPN8	CAPN8	CAPN8	chr1:223714971-223853436	ctrl	dox	OK	0	0.0682269	inf	#NAME?	0.0005	0.00552122	yes	2.96766
SOX8	SOX8	SOX8	chr16:1031807-1036979	ctrl	dox	OK	5.03979	39.4278	2.96778	6.79159	5e-05	0.000758876	yes	2.96528
DMRTB1	DMRTB1	DMRTB1	chr1:53925071-53933158	ctrl	dox	OK	0	0.0673946	inf	#NAME?	0.0009	0.00885452	yes	2.95223
TLX1	TLX1	TLX1	chr10:102891060-102897546	ctrl	dox	OK	0	0.0672375	inf	#NAME?	0.00055	0.00600319	yes	2.9493
PROP1	PROP1	PROP1	chr5:177419235-177423243	ctrl	dox	OK	0	0.0671239	inf	#NAME?	0.0029	0.0227378	yes	2.94718
DUSP15	DUSP15	DUSP15	chr20:30448869-30458479	ctrl	dox	OK	1.33076	10.315	2.95443	3.89889	5e-05	0.000758876	yes	2.94502
RXRG	RXRG	RXRG	chr1:165370158-165414592	ctrl	dox	OK	0.322387	2.53937	2.97761	2.41599	0.00025	0.00312152	yes	2.9392
SERPINA12	SERPINA12	SERPINA12	chr14:94953619-94984181	ctrl	dox	OK	0	0.0665341	inf	#NAME?	0.00075	0.007695	yes	2.9361
GAL3ST3	GAL3ST3	GAL3ST3	chr11:65808235-65816651	ctrl	dox	OK	0	0.0663269	inf	#NAME?	0.0006	0.00643164	yes	2.93219
S100A2	S100A2	S100A2	chr1:153533584-153538306	ctrl	dox	OK	18.9729	144.606	2.93011	6.57738	5e-05	0.000758876	yes	2.92945
RASGRP2	RASGRP2	RASGRP2	chr11:64494382-64512928	ctrl	dox	OK	0	0.0661673	inf	#NAME?	0.0004	0.00458914	yes	2.92917
KIAA1644	KIAA1644	KIAA1644	chr22:44639556-44708731	ctrl	dox	OK	0.0833095	0.697195	3.06501	3.15485	5e-05	0.000758876	yes	2.92201
DEGS2	DEGS2	DEGS2	chr14:100612752-100626012	ctrl	dox	OK	0	0.06577	inf	#NAME?	0.00645	0.0422355	yes	2.92163
GNAZ	GNAZ	GNAZ	chr22:23401592-23484241	ctrl	dox	OK	0.972016	7.42747	2.93382	4.30365	5e-05	0.000758876	yes	2.92099
USHBP1	USHBP1	USHBP1	chr19:17360848-17375544	ctrl	dox	OK	0	0.0655971	inf	#NAME?	5e-05	0.000758876	yes	2.91833
NYAP1	NYAP1	NYAP1	chr7:100081549-100092424	ctrl	dox	OK	0.101165	0.830278	3.03689	2.95405	0.00035	0.00411812	yes	2.91816
GPSM1	GPSM1	GPSM1	chr9:139221931-139254057	ctrl	dox	OK	2.45981	18.6582	2.92319	5.63995	5e-05	0.000758876	yes	2.91811
HID1	HID1	HID1	chr17:72946838-72971823	ctrl	dox	OK	0.0974846	0.801121	3.03877	2.28747	0.00315	0.0242012	yes	2.91579
NOTCH3	NOTCH3	NOTCH3	chr19:15270443-15311792	ctrl	dox	OK	0.0696332	0.585411	3.0716	2.92441	0.00025	0.00312152	yes	2.90244
SHANK1	SHANK1	SHANK1	chr19:51165083-51220195	ctrl	dox	OK	0.0447679	0.398294	3.1533	2.92943	0.0002	0.00255224	yes	2.89821
SEC14L4	SEC14L4	SEC14L4	chr22:30884897-30901698	ctrl	dox	OK	0.063378	0.53657	3.08171	2.27962	0.0013	0.0119639	yes	2.89699
MSI1	MSI1	MSI1	chr12:120779132-120806983	ctrl	dox	OK	0.0950712	0.771245	3.02011	2.7081	0.0007	0.00729454	yes	2.89441
PDE4A	PDE4A	PDE4A	chr19:10527448-10580307	ctrl	dox	OK	0.137979	1.08909	2.9806	3.11733	5e-05	0.000758876	yes	2.89285
ZNF629	ZNF629	ZNF629	chr16:30789769-30798523	ctrl	dox	OK	0.51966	3.9082	2.91086	4.33484	5e-05	0.000758876	yes	2.88705
MT1X	MT1X	MT1X	chr16:56716381-56718108	ctrl	dox	OK	55.9681	412.634	2.88219	5.98068	5e-05	0.000758876	yes	2.88196
PGPEP1L	PGPEP1L	PGPEP1L	chr15:99511458-99551024	ctrl	dox	OK	0	0.0636902	inf	#NAME?	0.0022	0.0182875	yes	2.88147
LOC100862671	LOC100862671	LOC100862671	chr16:30751511-30756517	ctrl	dox	OK	0.695971	5.18399	2.89696	3.52952	5e-05	0.000758876	yes	2.87916
TF	TF	TF	chr3:133464976-133497850	ctrl	dox	OK	0.786207	5.84297	2.89372	3.70113	5e-05	0.000758876	yes	2.87795
RIMS3	RIMS3	RIMS3	chr1:41086351-41131324	ctrl	dox	OK	0.558017	4.16001	2.89821	4.52636	5e-05	0.000758876	yes	2.87604
SPINT1	SPINT1	SPINT1	chr15:41136245-41149853	ctrl	dox	OK	1.03298	7.64579	2.88785	3.90062	5e-05	0.000758876	yes	2.87584
SHF	SHF	SHF	chr15:45459411-45493373	ctrl	dox	OK	0.757363	5.61489	2.8902	3.76168	5e-05	0.000758876	yes	2.87384
STAP2	STAP2	STAP2	chr19:4324039-4338847	ctrl	dox	OK	0.264317	1.99974	2.91947	2.47973	0.00085	0.00846464	yes	2.87309
DISP2	DISP2	DISP2	chr15:40650433-40663256	ctrl	dox	OK	0.10584	0.837168	2.98363	3.15915	5e-05	0.000758876	yes	2.87051
ZBTB46	ZBTB46	ZBTB46	chr20:62371210-62436856	ctrl	dox	OK	0.303682	2.28029	2.90858	2.04464	0.00425	0.0304504	yes	2.86816
COL8A2	COL8A2	COL8A2	chr1:36560843-36565850	ctrl	dox	OK	0.126069	0.98132	2.96051	2.97962	5e-05	0.000758876	yes	2.86501
LINGO4	LINGO4	LINGO4	chr1:151772764-151777882	ctrl	dox	OK	0	0.0626794	inf	#NAME?	0.0004	0.00458914	yes	2.86155
KCNJ10	KCNJ10	KCNJ10	chr1:160007256-160040051	ctrl	dox	OK	0.317321	2.36668	2.89885	3.62413	5e-05	0.000758876	yes	2.86017
BPIFB4	BPIFB4	BPIFB4	chr20:31669317-31699557	ctrl	dox	OK	0	0.0622175	inf	#NAME?	0.00115	0.0108276	yes	2.85235
CSF2RB	CSF2RB	CSF2RB	chr22:37309674-37336479	ctrl	dox	OK	0	0.0621157	inf	#NAME?	5e-05	0.000758876	yes	2.85031
CHI3L2	CHI3L2	CHI3L2	chr1:111770280-111786062	ctrl	dox	OK	1.54253	11.1818	2.85779	3.98849	5e-05	0.000758876	yes	2.84975
CSPG4	CSPG4	CSPG4	chr15:75966662-76005189	ctrl	dox	OK	7.82133	56.2504	2.84638	7.78914	5e-05	0.000758876	yes	2.84479
ARHGAP30	ARHGAP30	ARHGAP30	chr1:161016731-161039760	ctrl	dox	OK	1.54431	11.1437	2.85119	5.31681	5e-05	0.000758876	yes	2.84318
GSDMC	GSDMC	GSDMC	chr8:130760441-130799134	ctrl	dox	OK	0	0.0613494	inf	#NAME?	0.0009	0.00885452	yes	2.8349
ISG20	ISG20	ISG20	chr15:89182038-89198879	ctrl	dox	OK	18.4756	131.814	2.83481	5.95086	5e-05	0.000758876	yes	2.83414
MEP1A	MEP1A	MEP1A	chr6:46761093-46807519	ctrl	dox	OK	0	0.0612055	inf	#NAME?	0.00065	0.00685708	yes	2.83199
PGA5	PGA5	PGA5	chr11:61008628-61018929	ctrl	dox	OK	0	0.0611381	inf	#NAME?	0.0062	0.0410324	yes	2.83062
CD300LF	CD300LF	CD300LF	chr17:72667255-72743474	ctrl	dox	OK	0	0.0610447	inf	#NAME?	0.0003	0.00361996	yes	2.82873
PRTFDC1	PRTFDC1	PRTFDC1	chr10:25137535-25241573	ctrl	dox	OK	0.316707	2.31094	2.86726	2.85617	0.0001	0.00140493	yes	2.82864
COL6A1	COL6A1	COL6A1	chr21:47401662-47424963	ctrl	dox	OK	2.7979	19.9372	2.83304	6.25845	5e-05	0.000758876	yes	2.82862
C8orf31	C8orf31	C8orf31	chr8:144120678-144135720	ctrl	dox	OK	0.149794	1.12431	2.90798	2.46851	0.00105	0.0100871	yes	2.82753
DENND2A	DENND2A	DENND2A	chr7:140218219-140302342	ctrl	dox	OK	0.342017	2.48695	2.86224	2.83185	5e-05	0.000758876	yes	2.82645
FAM172BP	FAM172BP	FAM172BP	chr3:101237710-101242731	ctrl	dox	OK	0.163269	1.21818	2.8994	2.53772	0.002	0.0169467	yes	2.82544
FAM181A	FAM181A	FAM181A	chr14:94371075-94395954	ctrl	dox	OK	0	0.0608361	inf	#NAME?	0.00085	0.00846464	yes	2.82448
RBP3	RBP3	RBP3	chr10:48381486-48390991	ctrl	dox	OK	0	0.0607864	inf	#NAME?	5e-05	0.000758876	yes	2.82347
SLC1A6	SLC1A6	SLC1A6	chr19:15060844-15121455	ctrl	dox	OK	0	0.0606886	inf	#NAME?	0.00015	0.001995	yes	2.82148
MAPK15	MAPK15	MAPK15	chr8:144798506-144804633	ctrl	dox	OK	0	0.0606872	inf	#NAME?	0.0015	0.0134059	yes	2.82145
BIN1	BIN1	BIN1	chr2:127805598-127864903	ctrl	dox	OK	3.61498	25.5932	2.8237	5.13278	5e-05	0.000758876	yes	2.82028
PTP4A3	PTP4A3	PTP4A3	chr8:142431487-142442554	ctrl	dox	OK	0.192498	1.42006	2.88304	2.92338	0.0001	0.00140493	yes	2.8201
C20orf203	C20orf203	C20orf203	chr20:31219426-31239783	ctrl	dox	OK	0	0.0605869	inf	#NAME?	5e-05	0.000758876	yes	2.8194
RHOB	RHOB	RHOB	chr2:20646834-20649201	ctrl	dox	OK	53.1177	372.429	2.8097	7.78674	5e-05	0.000758876	yes	2.80947
SYT5	SYT5	SYT5	chr19:55684468-55691720	ctrl	dox	OK	0.160812	1.18697	2.88384	2.57366	0.00055	0.00600319	yes	2.80891
KLHL26	KLHL26	KLHL26	chr19:18747837-18781302	ctrl	dox	OK	0.343373	2.46531	2.84392	3.3008	5e-05	0.000758876	yes	2.80835
PTPRZ1	PTPRZ1	PTPRZ1	chr7:121513158-121702090	ctrl	dox	OK	0.44042	3.13435	2.83121	3.83134	5e-05	0.000758876	yes	2.80342
FOXA3	FOXA3	FOXA3	chr19:46367517-46377055	ctrl	dox	OK	0.949695	6.67489	2.81321	3.54382	5e-05	0.000758876	yes	2.80026
KCNA7	KCNA7	KCNA7	chr19:49570674-49576198	ctrl	dox	OK	0.026168	0.240785	3.20187	2.17162	0.00785	0.049455	yes	2.79367
ARRB1	ARRB1	ARRB1	chr11:74971165-75062875	ctrl	dox	OK	3.39086	23.4896	2.79229	6.79614	5e-05	0.000758876	yes	2.78866
ADAP1	ADAP1	ADAP1	chr7:937536-995043	ctrl	dox	OK	0.629599	4.40851	2.80779	3.46146	5e-05	0.000758876	yes	2.78832
PLEKHG6	PLEKHG6	PLEKHG6	chr12:6419601-6437672	ctrl	dox	OK	0.0883381	0.668852	2.92058	2.48581	0.0003	0.00361996	yes	2.78727
TBX4	TBX4	TBX4	chr17:59533806-59561664	ctrl	dox	OK	0	0.05896	inf	#NAME?	0.001	0.00966882	yes	2.78576
ACSL6	ACSL6	ACSL6	chr5:131285666-131347761	ctrl	dox	OK	0.0370494	0.314114	3.08377	2.04417	0.00015	0.001995	yes	2.78425
SLC4A9	SLC4A9	SLC4A9	chr5:139739786-139754722	ctrl	dox	OK	0	0.0588817	inf	#NAME?	5e-05	0.000758876	yes	2.78412
SEMA3B-AS1	SEMA3B-AS1	SEMA3B-AS1	chr3:50304072-50304803	ctrl	dox	OK	0.25852	1.83957	2.83102	1.31998	0.0069	0.0446127	yes	2.78409
OPRK1	OPRK1	OPRK1	chr8:54138275-54164257	ctrl	dox	OK	0.113965	0.842962	2.88688	2.54078	0.00075	0.007695	yes	2.78255
GDPD5	GDPD5	GDPD5	chr11:75145684-75236599	ctrl	dox	OK	3.48875	24.0105	2.78288	5.64648	5e-05	0.000758876	yes	2.77935
XAF1	XAF1	XAF1	chr17:6659155-6678964	ctrl	dox	OK	0.618686	4.29158	2.79423	3.52137	5e-05	0.000758876	yes	2.77446
CACNA1H	CACNA1H	CACNA1H	chr16:1203240-1275254	ctrl	dox	OK	0.037777	0.314818	3.05894	2.58079	0.0022	0.0182875	yes	2.76524
DAPK2	DAPK2	DAPK2	chr15:64199234-64338521	ctrl	dox	OK	0.0787751	0.591905	2.90955	2.31931	0.0029	0.0227378	yes	2.76131
IGDCC3	IGDCC3	IGDCC3	chr15:65619464-65670378	ctrl	dox	OK	0	0.0577131	inf	#NAME?	5e-05	0.000758876	yes	2.75943
ACE	ACE	ACE	chr17:61554421-61575741	ctrl	dox	OK	0.0124822	0.140681	3.49448	1.06468	0.0028	0.0221471	yes	2.74464
DMPK	DMPK	DMPK	chr19:46272966-46285815	ctrl	dox	OK	4.49086	30.068	2.74317	5.71277	5e-05	0.000758876	yes	2.74044
UNC5B	UNC5B	UNC5B	chr10:72972291-73062635	ctrl	dox	OK	0.0683581	0.513329	2.9087	3.01176	0.0004	0.00458914	yes	2.73956
APOE	APOE	APOE	chr19:45409038-45412650	ctrl	dox	OK	11.9572	79.8219	2.7389	6.0881	5e-05	0.000758876	yes	2.73788
SRCIN1	SRCIN1	SRCIN1	chr17:36686258-36762183	ctrl	dox	OK	0.127126	0.904705	2.83118	3.26206	5e-05	0.000758876	yes	2.7378
DCHS1	DCHS1	DCHS1	chr11:6642554-6677080	ctrl	dox	OK	0.225893	1.56177	2.78947	4.0339	5e-05	0.000758876	yes	2.73619
SNAI1	SNAI1	SNAI1	chr20:48599512-48605420	ctrl	dox	OK	0.950655	6.35308	2.74046	3.62064	5e-05	0.000758876	yes	2.72763
ALPI	ALPI	ALPI	chr2:233320832-233324742	ctrl	dox	OK	0	0.0560359	inf	#NAME?	0.0003	0.00361996	yes	2.72325
NES	NES	NES	chr1:156638555-156647189	ctrl	dox	OK	17.257	113.849	2.72187	7.66196	5e-05	0.000758876	yes	2.72116
ULBP3	ULBP3	ULBP3	chr6:150385742-150390202	ctrl	dox	OK	1.27917	8.49059	2.73066	2.90361	0.0001	0.00140493	yes	2.72112
ISM2	ISM2	ISM2	chr14:77940737-77965210	ctrl	dox	OK	0.0548868	0.415397	2.91996	1.99107	0.00265	0.0212225	yes	2.71281
SLC22A31	SLC22A31	SLC22A31	chr16:89262168-89266529	ctrl	dox	OK	0.0298507	0.250974	3.0717	1.35617	0.00265	0.0212225	yes	2.71123
NBPF22P	NBPF22P	NBPF22P	chr5:85578261-85593365	ctrl	dox	OK	0.102322	0.723149	2.82118	2.2952	0.00115	0.0108276	yes	2.70647
PPL	PPL	PPL	chr16:4932507-4987136	ctrl	dox	OK	0.124254	0.86548	2.80021	3.05998	0.0001	0.00140493	yes	2.70511
KCNK5	KCNK5	KCNK5	chr6:39156746-39197251	ctrl	dox	OK	1.02142	6.71293	2.71636	3.60358	5e-05	0.000758876	yes	2.70446
PPAP2C	PPAP2C	PPAP2C	chr19:281039-291435	ctrl	dox	OK	16.0074	104.151	2.70186	5.7531	5e-05	0.000758876	yes	2.7011
PSTPIP2	PSTPIP2	PSTPIP2	chr18:43563501-43652250	ctrl	dox	OK	0.183167	1.24555	2.76555	2.58498	0.0002	0.00255224	yes	2.7004
TUBA4A	TUBA4A	TUBA4A	chr2:220110191-220136910	ctrl	dox	OK	1.04393	6.81758	2.70723	1.96639	0.00475	0.033263	yes	2.6956
IL20RB	IL20RB	IL20RB	chr3:136676706-136729926	ctrl	dox	OK	0.589042	3.85773	2.71131	3.20615	5e-05	0.000758876	yes	2.69076
FIBCD1	FIBCD1	FIBCD1	chr9:133777824-133814455	ctrl	dox	OK	0.293768	1.93986	2.72321	3.07954	5e-05	0.000758876	yes	2.68233
CCDC109B	CCDC109B	CCDC109B	chr4:110481354-110608872	ctrl	dox	OK	0.446522	2.91476	2.70657	2.66808	0.00065	0.00685708	yes	2.67956
C1orf106	C1orf106	C1orf106	chr1:200860626-200884864	ctrl	dox	OK	0.82821	5.35494	2.6928	4.05116	5e-05	0.000758876	yes	2.67818
LINC00266-1	LINC00266-1	LINC00266-1	chr20:62921737-62934707	ctrl	dox	OK	0.253535	1.66839	2.7182	2.17655	0.00525	0.0360473	yes	2.67101
TCF15	TCF15	TCF15	chr20:584636-590910	ctrl	dox	OK	0.377787	2.45672	2.70109	2.43513	0.0014	0.0126955	yes	2.66926
MMP9	MMP9	MMP9	chr20:44637546-44645200	ctrl	dox	OK	0.11045	0.755429	2.7739	2.18834	0.0037	0.027384	yes	2.66783
RASD1	RASD1	RASD1	chr17:17397752-17399709	ctrl	dox	OK	0.134228	0.90574	2.75441	2.25023	0.0033	0.0251279	yes	2.66659
KCNJ12	KCNJ12,KCNJ18	KCNJ12,KCNJ18	chr17:21279698-21323179	ctrl	dox	OK	0.223418	1.47051	2.7185	2.75621	0.0003	0.00361996	yes	2.66511
FAM19A5	FAM19A5	FAM19A5	chr22:48885271-49147747	ctrl	dox	OK	0.858902	5.48684	2.67541	3.74757	5e-05	0.000758876	yes	2.66134
DUSP8	DUSP8	DUSP8	chr11:1575280-1593150	ctrl	dox	OK	0.150723	1.00232	2.73337	2.94262	5e-05	0.000758876	yes	2.65502
CEBPA	CEBPA	CEBPA	chr19:33790839-33793470	ctrl	dox	OK	0.0860307	0.592293	2.78339	2.1076	0.00345	0.0259618	yes	2.6489
SYTL1	SYTL1	SYTL1	chr1:27668482-27680423	ctrl	dox	OK	0.0889955	0.60862	2.77374	2.17678	0.0053	0.0363351	yes	2.64362
TSPEAR-AS1	TSPEAR-AS1	TSPEAR-AS1	chr21:45917774-46131495	ctrl	dox	OK	1.35978	8.52882	2.64898	3.55664	5e-05	0.000758876	yes	2.64009
ADAMTS7	ADAMTS7	ADAMTS7	chr15:79051544-79103773	ctrl	dox	OK	0.294089	1.88439	2.67977	3.30077	5e-05	0.000758876	yes	2.63917
RHD	RHD	RHD	chr1:25598976-25656936	ctrl	dox	OK	0.121948	0.810459	2.73247	1.96449	5e-05	0.000758876	yes	2.63646
SNCG	SNCG	SNCG	chr10:88718287-88723017	ctrl	dox	OK	0.397624	2.51967	2.66376	2.21603	0.00255	0.0206147	yes	2.63364
EPS8L2	EPS8L2	EPS8L2	chr11:706119-727727	ctrl	dox	OK	0.0792384	0.539733	2.76798	2.33546	0.0018	0.0155529	yes	2.62299
ZNF705D	ZNF705D	ZNF705D	chr8:11946846-11973025	ctrl	dox	OK	0.107159	0.711171	2.73045	2.29332	0.00225	0.0185998	yes	2.62187
NBPF4	NBPF4	NBPF4	chr1:108765962-108786703	ctrl	dox	OK	0.117399	0.774156	2.7212	2.23415	0.00075	0.007695	yes	2.62179
KIAA1024	KIAA1024	KIAA1024	chr15:79724857-79764642	ctrl	dox	OK	0.268844	1.70391	2.66401	3.48317	5e-05	0.000758876	yes	2.61976
IGLON5	IGLON5	IGLON5	chr19:51815101-51834102	ctrl	dox	OK	0.079132	0.535431	2.75837	2.3945	0.0019	0.0162527	yes	2.61338
ABCC11	ABCC11	ABCC11	chr16:48200821-48269088	ctrl	dox	OK	0.0451236	0.326186	2.85374	2.03346	0.0013	0.0119639	yes	2.60852
2016-09-04	2016-09-04	2016-09-04	chr17:56597197-56769416	ctrl	dox	OK	4.78266	29.1192	2.60609	5.11204	5e-05	0.000758876	yes	2.60357
SIRT2	SIRT2	SIRT2	chr19:39369194-39399534	ctrl	dox	OK	9.35258	56.7627	2.60151	4.74943	5e-05	0.000758876	yes	2.60022
CALB2	CALB2	CALB2	chr16:71392615-71424342	ctrl	dox	OK	15.3094	92.6147	2.59683	5.54068	5e-05	0.000758876	yes	2.59604
GPR115	GPR115	GPR115	chr6:47666288-47689757	ctrl	dox	OK	0.0716179	0.483142	2.75405	2.05113	0.00675	0.0438006	yes	2.59505
ANTXR1	ANTXR1	ANTXR1	chr2:69240275-69476459	ctrl	dox	OK	15.4724	93.1729	2.59021	5.75394	5e-05	0.000758876	yes	2.58944
CDSN	CDSN	CDSN	chr6_qbl_hap6:2378425-2403713	ctrl	dox	OK	0.152534	0.96817	2.66613	2.37816	0.0014	0.0126955	yes	2.58934
FGFR3	FGFR3	FGFR3	chr4:1795038-1810599	ctrl	dox	OK	2.86482	17.2744	2.59212	5.57517	5e-05	0.000758876	yes	2.58793
LAMB3	LAMB3	LAMB3	chr1:209788217-209825820	ctrl	dox	OK	16.4756	98.9668	2.58661	6.4583	5e-05	0.000758876	yes	2.58588
TSPAN15	TSPAN15	TSPAN15	chr10:71211225-71267423	ctrl	dox	OK	2.49672	14.9652	2.5835	4.03667	5e-05	0.000758876	yes	2.5787
TNFAIP2	TNFAIP2	TNFAIP2	chr14:103592663-103603776	ctrl	dox	OK	2.43334	14.5552	2.58053	4.98159	5e-05	0.000758876	yes	2.5756
ATP2A3	ATP2A3	ATP2A3	chr17:3827162-3867758	ctrl	dox	OK	0.0833896	0.544354	2.70661	2.42974	5e-05	0.000758876	yes	2.56947
MAFF	MAFF	MAFF	chr22:38597938-38612517	ctrl	dox	OK	71.2109	420.852	2.56314	6.41254	5e-05	0.000758876	yes	2.56297
LOC101928107	LOC101928107	LOC101928107	chr21:34484009-34496006	ctrl	dox	OK	0.686492	4.09911	2.578	2.45558	0.0003	0.00361996	yes	2.56065
PCSK5	PCSK5	PCSK5	chr9:78505559-78977255	ctrl	dox	OK	0.015368	0.139603	3.18334	1.69717	0.00115	0.0108276	yes	2.56006
DNAI1	DNAI1	DNAI1	chr9:34458749-34520987	ctrl	dox	OK	0.0924213	0.593179	2.68217	2.41189	0.0014	0.0126955	yes	2.55807
NXN	NXN	NXN	chr17:702552-882998	ctrl	dox	OK	0.265293	1.60984	2.60126	2.36482	0.0005	0.00552122	yes	2.55681
SPN	SPN	SPN	chr16:29674270-29681823	ctrl	dox	OK	0.196223	1.19945	2.6118	3.18859	5e-05	0.000758876	yes	2.55207
SPTBN4	SPTBN4	SPTBN4	chr19:40973125-41082365	ctrl	dox	OK	0.0738551	0.4812	2.70387	2.06923	0.00035	0.00411812	yes	2.55034
FAM83H	FAM83H	FAM83H	chr8:144806102-144815914	ctrl	dox	OK	0.351443	2.10595	2.58311	3.34986	5e-05	0.000758876	yes	2.54947
SORBS3	SORBS3	SORBS3	chr8:22409250-22433008	ctrl	dox	OK	0.30594	1.83722	2.5862	3.075	5e-05	0.000758876	yes	2.54763
CYTH4	CYTH4	CYTH4	chr22:37678494-37711389	ctrl	dox	OK	0.0647611	0.425305	2.7153	2.04381	0.00155	0.0137569	yes	2.54167
XYLT1	XYLT1	XYLT1	chr16:17196180-17564738	ctrl	dox	OK	1.07473	6.26585	2.54353	5.09305	5e-05	0.000758876	yes	2.53247
DENND6B	DENND6B	DENND6B	chr22:50750391-50765489	ctrl	dox	OK	0.090889	0.571078	2.65151	2.13039	0.00375	0.0276628	yes	2.52596
TNFRSF4	TNFRSF4	TNFRSF4	chr1:1146705-1149548	ctrl	dox	OK	0.190496	1.14473	2.58718	2.16913	0.00205	0.017305	yes	2.52591
ADCY2	ADCY2	ADCY2	chr5:7396342-7830194	ctrl	dox	OK	0.317381	1.87482	2.56246	3.22539	5e-05	0.000758876	yes	2.52538
GJC2	GJC2	GJC2	chr1:228337414-228347527	ctrl	dox	OK	0.19158	1.14863	2.58389	2.53382	0.0002	0.00255224	yes	2.523
PGF	PGF	PGF	chr14:75408532-75422467	ctrl	dox	OK	2.27504	13.0563	2.52079	3.98377	5e-05	0.000758876	yes	2.51556
VWF	VWF	VWF	chr12:6058039-6233836	ctrl	dox	OK	0.2171	1.28593	2.56637	3.50956	5e-05	0.000758876	yes	2.51259
AIM1L	AIM1L	AIM1L	chr1:26648349-26680621	ctrl	dox	OK	0.0455449	0.306243	2.74932	2.21195	0.00125	0.0116048	yes	2.50931
MATN3	MATN3	MATN3	chr2:20189964-20212455	ctrl	dox	OK	0.886246	5.09235	2.52255	3.11299	5e-05	0.000758876	yes	2.5092
CACNA1G	CACNA1G	CACNA1G	chr17:48633567-48704832	ctrl	dox	OK	0.0629905	0.405145	2.68523	1.82605	5e-05	0.000758876	yes	2.50783
S100A3	S100A3	S100A3	chr1:153519808-153521734	ctrl	dox	OK	2.29919	13.0666	2.50669	3.02967	5e-05	0.000758876	yes	2.50153
NOTUM	NOTUM	NOTUM	chr17:79910382-79919057	ctrl	dox	OK	0.434399	2.50636	2.5285	3.02783	5e-05	0.000758876	yes	2.50141
DEF6	DEF6	DEF6	chr6:35265594-35289548	ctrl	dox	OK	0.0648819	0.412831	2.66966	2.0493	0.0048	0.0335086	yes	2.49739
ATP2C2	ATP2C2	ATP2C2	chr16:84402128-84497793	ctrl	dox	OK	0.145727	0.868113	2.57461	2.32532	0.00025	0.00312152	yes	2.49539
LOC102724550	LOC102724550	LOC102724550	chr3:177534652-177617012	ctrl	dox	OK	0.021207	0.165125	2.96094	1.38377	0.00675	0.0438006	yes	2.48844
CDKN1C	CDKN1C	CDKN1C	chr11:2904447-2906995	ctrl	dox	OK	29.4491	164.461	2.48145	6.71591	5e-05	0.000758876	yes	2.48105
PRSS36	PRSS36	PRSS36	chr16:31150246-31161415	ctrl	dox	OK	0.118618	0.704317	2.5699	2.12413	0.00185	0.0159084	yes	2.47347
STRA6	STRA6	STRA6	chr15:74471807-74502046	ctrl	dox	OK	0.217444	1.24795	2.52084	2.31959	0.0002	0.00255224	yes	2.46749
CD79B	CD79B	CD79B	chr17:62006097-62009704	ctrl	dox	OK	0.482378	2.70715	2.48854	2.52395	0.0003	0.00361996	yes	2.46426
TMC4	TMC4	TMC4	chr19:54663832-54676944	ctrl	dox	OK	0.10906	0.643255	2.56028	2.01894	0.0049	0.0340215	yes	2.45596
CIB2	CIB2	CIB2	chr15:78396947-78423877	ctrl	dox	OK	1.06152	5.86239	2.46535	3.11306	5e-05	0.000758876	yes	2.45429
BTG2	BTG2	BTG2	chr1:203274663-203278729	ctrl	dox	OK	0.431636	2.4096	2.48091	2.84742	0.0001	0.00140493	yes	2.45384
CYP2S1	CYP2S1	CYP2S1	chr19:41699114-41713444	ctrl	dox	OK	0.0757808	0.459731	2.60089	1.96414	0.00495	0.0343023	yes	2.45311
PLXNA3	PLXNA3	PLXNA3	chrX:153686620-153701989	ctrl	dox	OK	0.38249	2.13464	2.4805	3.47522	5e-05	0.000758876	yes	2.45001
GLIPR2	GLIPR2	GLIPR2	chr9:36136532-36163910	ctrl	dox	OK	0.857819	4.71919	2.45979	3.03826	5e-05	0.000758876	yes	2.44613
CLSTN3	CLSTN3	CLSTN3	chr12:7282966-7311530	ctrl	dox	OK	0.485954	2.67825	2.4624	3.20885	5e-05	0.000758876	yes	2.43839
PRAP1	PRAP1	PRAP1	chr10:135160843-135166187	ctrl	dox	OK	0.228894	1.28329	2.48709	1.87977	0.0059	0.0394836	yes	2.4366
TNFRSF9	TNFRSF9	TNFRSF9	chr1:7975930-8003225	ctrl	dox	OK	0.0913201	0.537653	2.55767	2.29367	0.0017	0.0148388	yes	2.43434
MYL10	MYL10	MYL10	chr7:101256604-101272576	ctrl	dox	OK	0.414641	2.27802	2.45785	2.30564	0.00155	0.0137569	yes	2.42978
SPATA31D1	SPATA31D1	SPATA31D1	chr9:84603686-84610171	ctrl	dox	OK	0.491781	2.6789	2.44555	3.39411	5e-05	0.000758876	yes	2.42189
RASSF4	RASSF4	RASSF4	chr10:45455218-45490172	ctrl	dox	OK	6.10987	32.7837	2.42377	4.75449	5e-05	0.000758876	yes	2.42185
ANKRD18DP	ANKRD18DP	ANKRD18DP	chr3:197784403-197807542	ctrl	dox	OK	0.119254	0.682439	2.51666	2.13418	0.0015	0.0134059	yes	2.42148
HES2	HES2	HES2	chr1:6475293-6479979	ctrl	dox	OK	0.0607251	0.367537	2.59753	2.14768	0.00275	0.0218382	yes	2.41632
PLXNB1	PLXNB1	PLXNB1	chr3:48445260-48471460	ctrl	dox	OK	1.0146	5.44612	2.42432	4.6055	5e-05	0.000758876	yes	2.41281
GPR162	GPR162	GPR162	chr12:6930962-6936583	ctrl	dox	OK	0.30863	1.68549	2.44922	2.3758	0.00025	0.00312152	yes	2.41175
RASAL1	RASAL1	RASAL1	chr12:113536623-113574044	ctrl	dox	OK	0.173528	0.966527	2.47764	2.64205	0.00015	0.001995	yes	2.41166
TMEM130	TMEM130	TMEM130	chr7:98444110-98467673	ctrl	dox	OK	0.104604	0.597909	2.51499	2.10494	0.0012	0.0112102	yes	2.4072
KIF26A	KIF26A	KIF26A	chr14:104605059-104647235	ctrl	dox	OK	0.0988666	0.566507	2.51854	2.85541	5e-05	0.000758876	yes	2.40478
ST8SIA2	ST8SIA2	ST8SIA2	chr15:92937139-93011958	ctrl	dox	OK	0.0697107	0.412013	2.56324	1.8663	0.00535	0.036594	yes	2.40444
LYNX1	LYNX1	LYNX1	chr8:143845755-143859640	ctrl	dox	OK	0.553083	2.97078	2.42528	2.67874	5e-05	0.000758876	yes	2.40427
NGEF	NGEF	NGEF	chr2:233743395-233877951	ctrl	dox	OK	0.437238	2.34975	2.42601	3.06078	5e-05	0.000758876	yes	2.39952
OLAH	OLAH	OLAH	chr10:15085894-15115851	ctrl	dox	OK	0.142515	0.794372	2.4787	1.81823	0.0065	0.0425009	yes	2.39891
LOC728392	LOC728392	LOC728392	chr17:5402746-5404319	ctrl	dox	OK	0.927386	4.9326	2.41111	2.98439	5e-05	0.000758876	yes	2.39856
EFNB1	EFNB1	EFNB1	chrX:68048839-68062006	ctrl	dox	OK	4.62016	24.2955	2.39468	5.36276	5e-05	0.000758876	yes	2.39215
SALL3	SALL3	SALL3	chr18:76740274-76758969	ctrl	dox	OK	0.0486791	0.296014	2.60429	2.08286	0.0048	0.0335086	yes	2.38268
VWA7	VWA7	VWA7	chr6_ssto_hap7:3064183-3075920	ctrl	dox	OK	0.116991	0.652233	2.47899	2.2769	0.00215	0.0179634	yes	2.38261
NFIA-AS2	NFIA-AS2	NFIA-AS2	chr1:61405915-61436448	ctrl	dox	OK	0.676807	3.55998	2.39505	2.50576	0.00065	0.00685708	yes	2.37794
IGFBP3	IGFBP3	IGFBP3	chr7:45951843-45960871	ctrl	dox	OK	5.93432	30.88	2.37952	5.10429	5e-05	0.000758876	yes	2.37756
PDE1B	PDE1B	PDE1B	chr12:54943176-54973023	ctrl	dox	OK	0.0831623	0.472601	2.50662	2.07092	0.00085	0.00846464	yes	2.37301
CPNE7	CPNE7	CPNE7	chr16:89642175-89663654	ctrl	dox	OK	0.103948	0.580242	2.4808	2.16801	0.0016	0.0141308	yes	2.37293
TNS1	TNS1	TNS1	chr2:218664511-218808796	ctrl	dox	OK	0.24817	1.32694	2.4187	3.16973	5e-05	0.000758876	yes	2.37254
LRRC8E	LRRC8E	LRRC8E	chr19:7953389-7966908	ctrl	dox	OK	1.10276	5.74638	2.38153	3.70908	5e-05	0.000758876	yes	2.37102
LOC646268	LOC646268	LOC646268	chr1:158101833-158110430	ctrl	dox	OK	0.697373	3.62671	2.37866	2.34329	0.0009	0.00885452	yes	2.36209
VASH2	VASH2	VASH2	chr1:213123886-213164927	ctrl	dox	OK	0.0705271	0.40315	2.51507	1.92507	0.0016	0.0141308	yes	2.35912
COPZ2	COPZ2	COPZ2	chr17:46103532-46115168	ctrl	dox	OK	0.56459	2.93781	2.37946	2.23425	0.0008	0.00807874	yes	2.35904
CAMP	CAMP	CAMP	chr3:48264836-48266981	ctrl	dox	OK	0.49833	2.58613	2.37562	2.18655	0.00245	0.0199772	yes	2.35253
ITGB6	ITGB6	ITGB6	chr2:160956176-161056824	ctrl	dox	OK	0.0817892	0.458267	2.48621	1.95826	0.0001	0.00140493	yes	2.35094
CARD10	CARD10	CARD10	chr22:37886399-37915210	ctrl	dox	OK	2.22103	11.328	2.3506	4.48038	5e-05	0.000758876	yes	2.34538
LRP2	LRP2	LRP2	chr2:169983618-170219122	ctrl	dox	OK	0.0170896	0.127569	2.90008	2.29671	0.00355	0.0265474	yes	2.34434
ABAT	ABAT	ABAT	chr16:8768443-8878432	ctrl	dox	OK	1.09218	5.58562	2.35451	3.78064	5e-05	0.000758876	yes	2.34394
TLCD2	TLCD2	TLCD2	chr17:1606083-1613662	ctrl	dox	OK	0.254378	1.32356	2.37938	2.85293	5e-05	0.000758876	yes	2.33461
JAG2	JAG2	JAG2	chr14:105607317-105635161	ctrl	dox	OK	0.346435	1.78174	2.36264	3.27876	5e-05	0.000758876	yes	2.32965
ATF3	ATF3	ATF3	chr1:212738675-212794119	ctrl	dox	OK	4.70847	23.5925	2.325	4.603	5e-05	0.000758876	yes	2.32255
RYR1	RYR1	RYR1	chr19:38924339-39078204	ctrl	dox	OK	0.0107432	0.0936384	3.12367	2.37145	0.0048	0.0335086	yes	2.32085
NR4A1	NR4A1	NR4A1	chr12:52416615-52453291	ctrl	dox	OK	9.41967	47.0701	2.32106	5.71149	5e-05	0.000758876	yes	2.31984
ITGA7	ITGA7	ITGA7	chr12:56075329-56106089	ctrl	dox	OK	4.06928	20.2751	2.31686	5.25989	5e-05	0.000758876	yes	2.31403
MAP7	MAP7	MAP7	chr6:136663418-136871957	ctrl	dox	OK	0.197204	1.01878	2.36909	2.4389	5e-05	0.000758876	yes	2.31181
MAGEC3	MAGEC3	MAGEC3	chrX:140926101-140985618	ctrl	dox	OK	0.294374	1.48939	2.339	2.06573	0.00105	0.0100871	yes	2.30046
CGNL1	CGNL1	CGNL1	chr15:57668702-57842925	ctrl	dox	OK	0.324586	1.63778	2.33507	3.05927	5e-05	0.000758876	yes	2.30007
TSPAN11	TSPAN11	TSPAN11	chr12:31079837-31149537	ctrl	dox	OK	0.0441695	0.255552	2.53249	2.12235	0.0035	0.026261	yes	2.29344
FUT1	FUT1	FUT1	chr19:49251267-49258647	ctrl	dox	OK	0.173409	0.886875	2.35455	2.48332	0.0005	0.00552122	yes	2.28984
MAPK13	MAPK13	MAPK13	chr6:36098260-36112301	ctrl	dox	OK	0.100189	0.52876	2.39989	2.43522	0.0003	0.00361996	yes	2.28966
STC1	STC1	STC1	chr8:23699433-23712320	ctrl	dox	OK	0.731767	3.61039	2.3027	2.92927	5e-05	0.000758876	yes	2.28711
ROBO4	ROBO4	ROBO4	chr11:124754113-124767831	ctrl	dox	OK	0.276382	1.38065	2.32061	2.61378	5e-05	0.000758876	yes	2.27975
MRC2	MRC2	MRC2	chr17:60704761-60770962	ctrl	dox	OK	1.2057	5.87653	2.2851	4.31797	5e-05	0.000758876	yes	2.27563
SLC16A5	SLC16A5	SLC16A5	chr17:73083821-73102255	ctrl	dox	OK	0.254669	1.27108	2.31936	2.13357	0.00255	0.0206147	yes	2.2751
DNAH1	DNAH1	DNAH1	chr3:52350334-52434513	ctrl	dox	OK	0.0698077	0.376268	2.4303	2.85906	5e-05	0.000758876	yes	2.275
ZNF554	ZNF554	ZNF554	chr19:2819871-2836733	ctrl	dox	OK	0.859821	4.18212	2.28213	3.27463	5e-05	0.000758876	yes	2.26889
RASGRP1	RASGRP1	RASGRP1	chr15:38780301-38857007	ctrl	dox	OK	1.26839	6.15032	2.27767	3.87563	5e-05	0.000758876	yes	2.26868
SERPINE1	SERPINE1	SERPINE1	chr7:100770369-100782547	ctrl	dox	OK	15.2702	73.4111	2.26527	5.28505	5e-05	0.000758876	yes	2.26453
TRERF1	TRERF1	TRERF1	chr6:42192668-42419783	ctrl	dox	OK	0.160589	0.808888	2.33256	2.76399	5e-05	0.000758876	yes	2.26314
ANXA9	ANXA9	ANXA9	chr1:150954498-150968114	ctrl	dox	OK	0.508855	2.48025	2.28516	2.62995	0.0003	0.00361996	yes	2.26289
AFAP1L2	AFAP1L2	AFAP1L2	chr10:116054582-116164537	ctrl	dox	OK	2.48755	11.9544	2.26475	4.32478	5e-05	0.000758876	yes	2.26016
ADAMTS15	ADAMTS15	ADAMTS15	chr11:130318868-130346539	ctrl	dox	OK	0.439528	2.13966	2.28335	2.50635	0.00035	0.00411812	yes	2.25763
RORA	RORA	RORA	chr15:60771376-61521502	ctrl	dox	OK	0.423444	2.04971	2.27517	3.17397	5e-05	0.000758876	yes	2.24852
NOL4L	NOL4L	NOL4L	chr20:31030861-31172875	ctrl	dox	OK	0.636808	3.06298	2.26601	3.52305	5e-05	0.000758876	yes	2.24823
ABCB4	ABCB4	ABCB4	chr7:87031360-87105019	ctrl	dox	OK	1.01289	4.84908	2.25924	3.26333	5e-05	0.000758876	yes	2.24803
HMGCL	HMGCL	HMGCL	chr1:24128366-24151949	ctrl	dox	OK	10.2413	48.3835	2.24011	4.96916	5e-05	0.000758876	yes	2.23901
MAL	MAL	MAL	chr2:95691399-95719737	ctrl	dox	OK	9.78713	46.1552	2.23754	4.40371	5e-05	0.000758876	yes	2.23637
GALR2	GALR2	GALR2	chr17:74070881-74073622	ctrl	dox	OK	0.388951	1.86664	2.26278	2.20663	0.00075	0.007695	yes	2.23387
PRKAG2	PRKAG2	PRKAG2	chr7:151253200-151576308	ctrl	dox	OK	0.598067	2.84685	2.25099	2.47628	0.00015	0.001995	yes	2.23212
FGF1	FGF1	FGF1	chr5:141971742-142077635	ctrl	dox	OK	2.00249	9.44171	2.23725	3.96613	5e-05	0.000758876	yes	2.23159
LPIN3	LPIN3	LPIN3	chr20:39969559-39995498	ctrl	dox	OK	0.249656	1.2071	2.27353	2.24486	0.00295	0.0230393	yes	2.22877
PGAM2	PGAM2	PGAM2	chr7:44102325-44105186	ctrl	dox	OK	4.83397	22.6916	2.23088	3.57131	5e-05	0.000758876	yes	2.22853
DUXA	DUXA	DUXA	chr19:57663093-57678856	ctrl	dox	OK	0.101488	0.512238	2.3355	1.98411	0.0019	0.0162527	yes	2.22782
AXIN2	AXIN2	AXIN2	chr17:63524682-63557740	ctrl	dox	OK	0.512422	2.42992	2.2455	3.0546	5e-05	0.000758876	yes	2.22355
METRNL	METRNL	METRNL	chr17:81037566-81052591	ctrl	dox	OK	12.0331	56.0797	2.22047	4.97026	5e-05	0.000758876	yes	2.21953
CAMK2B	CAMK2B	CAMK2B	chr7:44256748-44365230	ctrl	dox	OK	0.0272774	0.163539	2.58386	1.11333	0.0004	0.00458914	yes	2.21889
PDZD4	PDZD4	PDZD4	chrX:153067622-153096003	ctrl	dox	OK	0.772448	3.62851	2.23187	3.33865	5e-05	0.000758876	yes	2.21728
PIGR	PIGR	PIGR	chr1:207101866-207119811	ctrl	dox	OK	0.131527	0.647367	2.29923	2.24079	0.00145	0.01305	yes	2.21562
WNT3	WNT3	WNT3	chr17:44839871-44896126	ctrl	dox	OK	0.29837	1.42181	2.25256	2.4587	0.00015	0.001995	yes	2.21511
SLC6A12	SLC6A12	SLC6A12	chr12:299242-323371	ctrl	dox	OK	1.06496	4.97599	2.22418	3.2318	5e-05	0.000758876	yes	2.2136
TMEM92	TMEM92	TMEM92	chr17:48348766-48358846	ctrl	dox	OK	0.166735	0.809583	2.27962	2.12824	0.0035	0.026261	yes	2.2133
ITGB7	ITGB7	ITGB7	chr12:53585101-53601091	ctrl	dox	OK	0.170499	0.825472	2.27545	1.99853	0.00105	0.0100871	yes	2.2106
VCX3B	VCX3B	VCX3B	chrX:8432870-8434551	ctrl	dox	OK	0.291268	1.38153	2.24585	2.1496	0.00325	0.0248314	yes	2.20755
NFATC1	NFATC1	NFATC1	chr18:77155771-77289323	ctrl	dox	OK	0.44653	2.09673	2.23131	2.59217	0.0003	0.00361996	yes	2.20622
SRC	SRC	SRC	chr20:35973087-36033835	ctrl	dox	OK	5.18056	23.8567	2.20321	5.13387	5e-05	0.000758876	yes	2.20104
FAM65C	FAM65C	FAM65C	chr20:49202644-49308067	ctrl	dox	OK	0.139464	0.676598	2.2784	2.41127	0.0003	0.00361996	yes	2.19967
DBN1	DBN1	DBN1	chr5:176883613-176900694	ctrl	dox	OK	22.763	104.551	2.19944	6.14728	5e-05	0.000758876	yes	2.19895
HDAC11	HDAC11	HDAC11	chr3:13521714-13547924	ctrl	dox	OK	6.37658	29.3098	2.20053	5.15064	5e-05	0.000758876	yes	2.19876
CCDC88C	CCDC88C	CCDC88C	chr14:91737666-91884188	ctrl	dox	OK	0.500291	2.33017	2.2196	3.44436	5e-05	0.000758876	yes	2.19722
ROCK1P1	ROCK1P1	ROCK1P1	chr18:109064-122222	ctrl	dox	OK	0.340636	1.58718	2.22016	2.19183	0.0008	0.00807874	yes	2.18748
CHST3	CHST3	CHST3	chr10:73724119-73773322	ctrl	dox	OK	5.16192	23.5211	2.18797	5.69074	5e-05	0.000758876	yes	2.1858
COL1A1	COL1A1	COL1A1	chr17:48261456-48279000	ctrl	dox	OK	0.140026	0.670757	2.2601	2.44834	0.00015	0.001995	yes	2.18193
FAM43A	FAM43A	FAM43A	chr3:194406621-194409766	ctrl	dox	OK	3.38	15.3231	2.18061	4.15204	5e-05	0.000758876	yes	2.17729
VAMP8	VAMP8	VAMP8	chr2:85804613-85809156	ctrl	dox	OK	3.87033	17.5192	2.17841	3.06266	5e-05	0.000758876	yes	2.17551
C9orf169	C9orf169	C9orf169	chr9:140119086-140120763	ctrl	dox	OK	1.07067	4.86891	2.18508	2.65275	0.0001	0.00140493	yes	2.17463
HBEGF	HBEGF	HBEGF	chr5:139712427-139726188	ctrl	dox	OK	16.4649	74.0974	2.17003	5.59704	5e-05	0.000758876	yes	2.16935
LAPTM5	LAPTM5	LAPTM5	chr1:31205314-31230683	ctrl	dox	OK	7.97838	35.8695	2.16859	4.47006	5e-05	0.000758876	yes	2.16718
ARHGAP23	ARHGAP23	ARHGAP23	chr17:36584719-36668628	ctrl	dox	OK	1.4177	6.39357	2.17307	4.21261	5e-05	0.000758876	yes	2.16518
NDRG1	NDRG1	NDRG1	chr8:134249413-134309547	ctrl	dox	OK	15.641	70.0603	2.16326	5.77962	5e-05	0.000758876	yes	2.16255
IRF7	IRF7	IRF7	chr11:612554-615999	ctrl	dox	OK	4.72953	21.1803	2.16296	4.2088	5e-05	0.000758876	yes	2.16059
PKDCC	PKDCC	PKDCC	chr2:42275160-42285668	ctrl	dox	OK	1.41408	6.35453	2.16792	3.16527	5e-05	0.000758876	yes	2.16002
FAM101B	FAM101B	FAM101B	chr17:289770-295731	ctrl	dox	OK	3.81232	17.064	2.16222	4.45154	5e-05	0.000758876	yes	2.15928
FAM131C	FAM131C	FAM131C	chr1:16384263-16400127	ctrl	dox	OK	0.220088	1.0162	2.20703	2.00146	0.00155	0.0137569	yes	2.15705
GRASP	GRASP	GRASP	chr12:52400728-52409673	ctrl	dox	OK	10.0749	44.9662	2.15807	5.11438	5e-05	0.000758876	yes	2.15696
TMEM139	TMEM139	TMEM139	chr7:142981991-142985142	ctrl	dox	OK	2.72953	12.2074	2.16103	3.39297	5e-05	0.000758876	yes	2.15694
EML1	EML1	EML1	chr14:100259744-100408395	ctrl	dox	OK	0.251515	1.15583	2.20021	2.45487	0.0002	0.00255224	yes	2.15639
FAM3B	FAM3B	FAM3B	chr21:42688660-42729654	ctrl	dox	OK	0.511445	2.31218	2.1766	1.85389	0.0035	0.026261	yes	2.15489
BMP8A	BMP8A	BMP8A	chr1:39957317-40025370	ctrl	dox	OK	0.218467	1.00426	2.20065	2.25887	0.001	0.00966882	yes	2.15037
HSD17B3	HSD17B3	HSD17B3	chr9:98997588-99064434	ctrl	dox	OK	2.32044	10.3118	2.15182	2.90304	5e-05	0.000758876	yes	2.14702
SCN4A	SCN4A	SCN4A	chr17:62015913-62050278	ctrl	dox	OK	0.0369035	0.19761	2.42083	2.14408	0.0018	0.0155529	yes	2.14611
PLXNA2	PLXNA2	PLXNA2	chr1:208195587-208417665	ctrl	dox	OK	0.0493338	0.25244	2.35529	2.13084	0.00145	0.01305	yes	2.14506
ADSSL1	ADSSL1	ADSSL1	chr14:105190533-105213647	ctrl	dox	OK	0.567362	2.54034	2.16268	2.47269	0.0003	0.00361996	yes	2.14314
C11orf96	C11orf96	C11orf96	chr11:43964105-43965433	ctrl	dox	OK	3.91608	17.2879	2.14228	3.27985	5e-05	0.000758876	yes	2.13944
UNC5CL	UNC5CL	UNC5CL	chr6:40994639-41006938	ctrl	dox	OK	0.0930784	0.441443	2.24571	1.89764	0.0065	0.0425009	yes	2.1308
BSPRY	BSPRY	BSPRY	chr9:116111811-116133513	ctrl	dox	OK	0.165389	0.756453	2.19339	1.93237	0.0038	0.0279512	yes	2.12764
PLEKHB1	PLEKHB1	PLEKHB1	chr11:73357222-73373864	ctrl	dox	OK	14.9703	65.4342	2.12794	4.95902	5e-05	0.000758876	yes	2.1272
JUP	JUP	JUP	chr17:39910858-39942964	ctrl	dox	OK	1.81119	7.92736	2.1299	3.77376	5e-05	0.000758876	yes	2.12378
LOC729683	LOC729683	LOC729683	chr17:61777697-61780045	ctrl	dox	OK	0.43265	1.91552	2.14647	2.31071	0.00085	0.00846464	yes	2.12101
CRYAB	CRYAB	CRYAB	chr11:111779343-111797595	ctrl	dox	OK	6.59466	28.7102	2.1222	3.58544	5e-05	0.000758876	yes	2.12051
PPIF	PPIF	PPIF	chr10:81107219-81115089	ctrl	dox	OK	64.364	278.582	2.11378	5.75404	5e-05	0.000758876	yes	2.1136
LAD1	LAD1	LAD1	chr1:201349965-201368669	ctrl	dox	OK	0.67423	2.94909	2.12896	2.75533	0.0003	0.00361996	yes	2.1126
RGS9	RGS9	RGS9	chr17:63133455-63223821	ctrl	dox	OK	0.260269	1.15659	2.15181	2.10964	0.0012	0.0112102	yes	2.10983
OLIG1	OLIG1	OLIG1	chr21:34442449-34444728	ctrl	dox	OK	0.727403	3.17114	2.12418	2.34302	0.0007	0.00729454	yes	2.10902
PGM2L1	PGM2L1	PGM2L1	chr11:74041360-74109502	ctrl	dox	OK	0.377752	1.65999	2.13567	2.89559	5e-05	0.000758876	yes	2.10663
CLU	CLU	CLU	chr8:27454433-27472328	ctrl	dox	OK	5.98007	25.7442	2.10601	4.4615	5e-05	0.000758876	yes	2.10416
FEZ1	FEZ1	FEZ1	chr11:125315640-125366206	ctrl	dox	OK	2.88463	12.4232	2.10658	3.42739	5e-05	0.000758876	yes	2.10275
LMTK3	LMTK3	LMTK3	chr19:48988527-49016446	ctrl	dox	OK	0.171865	0.770844	2.16516	2.27549	0.00055	0.00600319	yes	2.10217
SRSF12	SRSF12	SRSF12	chr6:89805677-89827800	ctrl	dox	OK	0.15862	0.710167	2.16258	1.86466	0.004	0.0290534	yes	2.09456
GFPT2	GFPT2	GFPT2	chr5:179727699-179780315	ctrl	dox	OK	6.40189	27.2633	2.09039	4.78326	5e-05	0.000758876	yes	2.08867
FER1L4	FER1L4	FER1L4	chr20:34146506-34195484	ctrl	dox	OK	0.0441537	0.220118	2.31767	1.91102	0.0036	0.0267874	yes	2.08724
MFAP2	MFAP2	MFAP2	chr1:17300998-17308081	ctrl	dox	OK	9.51438	40.4404	2.08761	4.02321	5e-05	0.000758876	yes	2.08646
ALK	ALK	ALK	chr2:29415639-30144477	ctrl	dox	OK	0.186894	0.81913	2.13187	2.03723	0.00265	0.0212225	yes	2.07418
LDLRAD4	LDLRAD4	LDLRAD4	chr18:13218728-13652753	ctrl	dox	OK	0.964285	4.06412	2.07541	3.69339	5e-05	0.000758876	yes	2.06407
ADAM21	ADAM21	ADAM21	chr14:70918873-70926622	ctrl	dox	OK	0.82167	3.46654	2.07687	2.53473	0.0002	0.00255224	yes	2.06357
TRAF1	TRAF1	TRAF1	chr9:123664670-123691451	ctrl	dox	OK	9.69042	40.4646	2.06203	5.19843	5e-05	0.000758876	yes	2.0609
AGT	AGT	AGT	chr1:230838271-230850336	ctrl	dox	OK	0.265857	1.14035	2.10075	2.06145	0.00135	0.0123418	yes	2.06008
OLFML2A	OLFML2A	OLFML2A	chr9:127539436-127577170	ctrl	dox	OK	0.684126	2.87403	2.07074	3.20188	5e-05	0.000758876	yes	2.05482
IL21R	IL21R	IL21R	chr16:27413482-27464714	ctrl	dox	OK	0.536411	2.25853	2.07397	2.30377	0.0011	0.0104944	yes	2.0537
SLIT3	SLIT3	SLIT3	chr5:168088737-168728133	ctrl	dox	OK	0.365091	1.54605	2.08226	3.10484	5e-05	0.000758876	yes	2.05258
ZNF442	ZNF442	ZNF442	chr19:12460184-12476475	ctrl	dox	OK	0.597647	2.51046	2.07059	2.51235	0.00035	0.00411812	yes	2.05238
BACH2	BACH2	BACH2	chr6:90636246-91006627	ctrl	dox	OK	0.0985365	0.43991	2.15848	2.32611	0.0011	0.0104944	yes	2.05146
KREMEN2	KREMEN2	KREMEN2	chr16:3014216-3018384	ctrl	dox	OK	1.24135	5.17296	2.05908	2.75511	5e-05	0.000758876	yes	2.05029
ATP1A3	ATP1A3	ATP1A3	chr19:42470733-42498428	ctrl	dox	OK	0.0385785	0.191027	2.30791	1.56482	0.0052	0.0357313	yes	2.049
SLC9A3	SLC9A3	SLC9A3	chr5:473333-524549	ctrl	dox	OK	0.161844	0.700696	2.11418	1.9703	0.0022	0.0182875	yes	2.04813
CALCR	CALCR	CALCR	chr7:93053798-93204042	ctrl	dox	OK	0.100935	0.448201	2.15072	1.75474	0.00355	0.0265474	yes	2.04627
TSPYL2	TSPYL2	TSPYL2	chrX:53111541-53117728	ctrl	dox	OK	4.38547	18.0769	2.04335	4.35528	5e-05	0.000758876	yes	2.04086
SYT7	SYT7	SYT7	chr11:61281187-61348344	ctrl	dox	OK	0.0457758	0.21831	2.25372	1.79981	0.00435	0.0309938	yes	2.03328
RAB37	RAB37	RAB37	chr17:72667255-72743474	ctrl	dox	OK	0.0968396	0.4266	2.13921	1.59157	0.0033	0.0251279	yes	2.03087
SLC22A17	SLC22A17	SLC22A17	chr14:23815519-23822121	ctrl	dox	OK	0.569262	2.35361	2.04771	2.49324	0.00015	0.001995	yes	2.0287
SLC9A3R2	SLC9A3R2	SLC9A3R2	chr16:2076868-2089027	ctrl	dox	OK	2.15275	8.80404	2.03198	3.24316	5e-05	0.000758876	yes	2.02694
SLC7A7	SLC7A7	SLC7A7	chr14:23242431-23289020	ctrl	dox	OK	0.431874	1.79075	2.05189	2.08505	0.0012	0.0112102	yes	2.02689
ID4	ID4	ID4	chr6:19837600-19842431	ctrl	dox	OK	14.0745	57.3174	2.02589	5.20608	5e-05	0.000758876	yes	2.02512
FSTL1	FSTL1	FSTL1	chr3:120113060-120169918	ctrl	dox	OK	26.854	109.221	2.02404	5.56404	5e-05	0.000758876	yes	2.02364
FRG1B	FRG1B	FRG1B	chr20:29611878-29634007	ctrl	dox	OK	12.3971	50.386	2.02302	4.14671	5e-05	0.000758876	yes	2.02214
SIDT2	SIDT2	SIDT2	chr11:117049938-117075508	ctrl	dox	OK	2.3944	9.75524	2.02652	3.18186	5e-05	0.000758876	yes	2.02198
GNG7	GNG7	GNG7	chr19:2511217-2702746	ctrl	dox	OK	1.76384	7.19418	2.02811	3.69406	5e-05	0.000758876	yes	2.02196
DRP2	DRP2	DRP2	chrX:100474932-100519485	ctrl	dox	OK	0.119628	0.514884	2.10569	2.12118	0.002	0.0169467	yes	2.01762
INPP5D	INPP5D	INPP5D	chr2:233924676-234116549	ctrl	dox	OK	0.0635388	0.285785	2.16922	1.99775	0.0066	0.0430138	yes	2.00797
IQSEC1	IQSEC1	IQSEC1	chr3:12938541-13114617	ctrl	dox	OK	1.77017	7.11399	2.00677	4.07408	5e-05	0.000758876	yes	2.00067
NRIP3	NRIP3	NRIP3	chr11:9002122-9025596	ctrl	dox	OK	17.5841	70.1598	1.99637	4.93821	5e-05	0.000758876	yes	1.99576
IFI27	IFI27	IFI27	chr14:94577078-94583036	ctrl	dox	OK	2.48457	9.93853	2.00004	1.96472	0.0004	0.00458914	yes	1.99569
NRIP2	NRIP2	NRIP2	chr12:2934513-2944221	ctrl	dox	OK	0.243271	0.998715	2.03751	2.10151	0.00105	0.0100871	yes	1.99376
VANGL2	VANGL2	VANGL2	chr1:160370363-160398468	ctrl	dox	OK	0.277487	1.13277	2.02936	2.17863	0.00135	0.0123418	yes	1.99097
TMEM40	TMEM40	TMEM40	chr3:12775028-12810956	ctrl	dox	OK	0.203768	0.83934	2.04233	1.65876	0.0027	0.0215556	yes	1.9903
CYB5R2	CYB5R2	CYB5R2	chr11:7686325-7694821	ctrl	dox	OK	8.90313	35.3767	1.99041	3.82153	5e-05	0.000758876	yes	1.9892
NRGN	NRGN	NRGN	chr11:124609828-124617102	ctrl	dox	OK	0.599757	2.40872	2.00581	1.89487	0.0024	0.0196498	yes	1.98794
TCF7	TCF7	TCF7	chr5:133450401-133483920	ctrl	dox	OK	0.62242	2.49121	2.00088	2.5934	0.0002	0.00255224	yes	1.98367
CAPN5	CAPN5	CAPN5	chr11:76777991-76837198	ctrl	dox	OK	1.11921	4.42619	1.98359	3.20906	5e-05	0.000758876	yes	1.97401
TIMP4	TIMP4	TIMP4	chr3:12045833-12233532	ctrl	dox	OK	0.645731	2.56523	1.99009	2.02081	0.00395	0.0287717	yes	1.97353
MLXIPL	MLXIPL	MLXIPL	chr7:73007523-73038870	ctrl	dox	OK	0.0810448	0.345468	2.09176	1.73006	0.00335	0.0254331	yes	1.96507
GPR157	GPR157	GPR157	chr1:9164475-9189229	ctrl	dox	OK	6.24308	24.3967	1.96635	3.33611	5e-05	0.000758876	yes	1.96464
COL5A1	COL5A1	COL5A1	chr9:137533650-137764464	ctrl	dox	OK	0.200582	0.811755	2.01685	1.83931	0.0015	0.0134059	yes	1.96433
ADAM19	ADAM19	ADAM19	chr5:156904311-157002831	ctrl	dox	OK	24.7633	96.2387	1.95842	5.65851	5e-05	0.000758876	yes	1.95798
AIF1L	AIF1L	AIF1L	chr9:133971862-133998539	ctrl	dox	OK	7.63555	29.5124	1.95052	4.59579	5e-05	0.000758876	yes	1.94912
CD9	CD9	CD9	chr12:6309481-6347437	ctrl	dox	OK	57.6763	222.733	1.94926	5.1902	5e-05	0.000758876	yes	1.94908
EBF4	EBF4	EBF4	chr20:2673523-2740754	ctrl	dox	OK	0.16146	0.651429	2.01243	2.0165	0.0014	0.0126955	yes	1.94771
ENG	ENG	ENG	chr9:130577290-130617052	ctrl	dox	OK	0.640624	2.49702	1.96265	2.54889	0.0001	0.00140493	yes	1.94608
KIAA0040	KIAA0040	KIAA0040	chr1:175126122-175162229	ctrl	dox	OK	0.97785	3.79528	1.95652	2.90339	0.0001	0.00140493	yes	1.94564
GPR179	GPR179	GPR179	chr17:36481492-36499693	ctrl	dox	OK	0.025178	0.124902	2.31057	1.81076	0.00605	0.0403221	yes	1.93917
TLR5	TLR5	TLR5	chr1:223282747-223316624	ctrl	dox	OK	0.196273	0.78102	1.9925	2.08705	0.001	0.00966882	yes	1.93916
ANGPTL4	ANGPTL4	ANGPTL4	chr19:8429010-8439259	ctrl	dox	OK	10.6043	40.641	1.93828	4.45391	5e-05	0.000758876	yes	1.93728
SLC43A2	SLC43A2	SLC43A2	chr17:1472547-1532180	ctrl	dox	OK	0.303053	1.18834	1.97131	2.64383	5e-05	0.000758876	yes	1.93656
ANGPTL2	ANGPTL2	ANGPTL2	chr9:129677052-129985445	ctrl	dox	OK	4.39421	16.8379	1.93803	3.81829	5e-05	0.000758876	yes	1.93561
IL23R	IL23R	IL23R	chr1:67632168-67725650	ctrl	dox	OK	0.975656	3.75842	1.94568	2.38077	0.00045	0.00505616	yes	1.9348
TMEM71	TMEM71	TMEM71	chr8:133722191-133772914	ctrl	dox	OK	0.214356	0.84728	1.98283	1.75228	0.007	0.0451455	yes	1.93398
ARHGEF10L	ARHGEF10L	ARHGEF10L	chr1:17866329-18024370	ctrl	dox	OK	1.82749	6.98621	1.93465	3.77332	5e-05	0.000758876	yes	1.92884
NOG	NOG	NOG	chr17:54671059-54672951	ctrl	dox	OK	2.94112	11.2126	1.93069	3.12653	5e-05	0.000758876	yes	1.92707
B4GALNT3	B4GALNT3	B4GALNT3	chr12:569542-671058	ctrl	dox	OK	4.41146	16.8013	1.92924	4.39735	5e-05	0.000758876	yes	1.92684
FBLL1	FBLL1	FBLL1	chr5:167956581-167957639	ctrl	dox	OK	0.661901	2.54408	1.94246	2.03757	0.00145	0.01305	yes	1.92648
FOSB	FOSB	FOSB	chr19:45971252-45978437	ctrl	dox	OK	0.350575	1.36011	1.95594	2.31535	0.0005	0.00552122	yes	1.92592
P4HA2	P4HA2	P4HA2	chr5:131520568-131563556	ctrl	dox	OK	30.6028	115.871	1.92078	5.33004	5e-05	0.000758876	yes	1.92044
LYSMD4	LYSMD4	LYSMD4	chr15:100267605-100273649	ctrl	dox	OK	2.62533	9.94171	1.92099	3.18097	5e-05	0.000758876	yes	1.91696
LOC100126784	LOC100126784	LOC100126784	chr11:19372270-20143147	ctrl	dox	OK	1.29258	4.90624	1.92437	1.95046	0.002	0.0169467	yes	1.91618
GATSL3	GATSL3	GATSL3	chr22:30681106-30685616	ctrl	dox	OK	1.5074	5.68278	1.91453	2.55451	0.0002	0.00255224	yes	1.90753
MFSD4	MFSD4	MFSD4	chr1:205538111-205572046	ctrl	dox	OK	0.148068	0.580629	1.97136	1.84423	0.00175	0.0152014	yes	1.90171
SORBS1	SORBS1	SORBS1	chr10:97071529-97321177	ctrl	dox	OK	3.71606	13.8842	1.9016	4.38072	5e-05	0.000758876	yes	1.89876
F11R	F11R	F11R	chr1:160965000-160991133	ctrl	dox	OK	16.806	62.5989	1.89716	5.30182	5e-05	0.000758876	yes	1.89653
ZNF711	ZNF711	ZNF711	chrX:84498996-84528368	ctrl	dox	OK	0.760234	2.85725	1.91011	2.40432	0.0002	0.00255224	yes	1.8963
GAL3ST4	GAL3ST4	GAL3ST4	chr7:99756864-99766373	ctrl	dox	OK	4.27136	15.9258	1.8986	3.79909	5e-05	0.000758876	yes	1.89613
RALGDS	RALGDS	RALGDS	chr9:135973106-136024607	ctrl	dox	OK	3.14531	11.7197	1.89767	3.90751	5e-05	0.000758876	yes	1.89431
CD34	CD34	CD34	chr1:208059882-208084683	ctrl	dox	OK	0.212964	0.815638	1.93732	1.79376	0.0051	0.0351788	yes	1.8887
MXRA7	MXRA7	MXRA7	chr17:74671808-74707056	ctrl	dox	OK	34.9531	129.38	1.88812	5.06103	5e-05	0.000758876	yes	1.88782
PPAPDC3	PPAPDC3	PPAPDC3	chr9:134165080-134184649	ctrl	dox	OK	0.186911	0.717756	1.94114	1.78136	0.00415	0.029925	yes	1.88591
LIF	LIF	LIF	chr22:30636435-30642840	ctrl	dox	OK	2.43316	9.00642	1.88812	3.53772	5e-05	0.000758876	yes	1.88381
TRIM51HP	TRIM51HP	TRIM51HP	chr11:55061178-55065708	ctrl	dox	OK	0.512024	1.91088	1.89995	1.78713	0.00645	0.0422355	yes	1.87958
EFNA3	EFNA3	EFNA3	chr1:155051347-155060014	ctrl	dox	OK	0.858545	3.17011	1.88457	2.18071	0.00115	0.0108276	yes	1.8724
KLHDC8B	KLHDC8B	KLHDC8B	chr3:49209017-49213919	ctrl	dox	OK	12.4848	45.7329	1.87306	4.51516	5e-05	0.000758876	yes	1.87222
COL19A1	COL19A1	COL19A1	chr6:70576447-70922157	ctrl	dox	OK	0.173358	0.661065	1.93104	2.25518	0.00095	0.00928033	yes	1.87179
IGF2BP1	IGF2BP1	IGF2BP1	chr17:47074773-47133507	ctrl	dox	OK	0.165842	0.63177	1.92959	2.18827	0.0013	0.0119639	yes	1.86778
SDC1	SDC1	SDC1	chr2:20400557-20425194	ctrl	dox	OK	8.65941	31.5221	1.86402	3.9642	5e-05	0.000758876	yes	1.86282
GIPC3	GIPC3	GIPC3	chr19:3585568-3593539	ctrl	dox	OK	0.0662771	0.266913	2.00979	1.81777	0.00545	0.0371084	yes	1.86011
NDRG4	NDRG4	NDRG4	chr16:58497548-58547523	ctrl	dox	OK	0.85005	3.10562	1.86926	2.49856	5e-05	0.000758876	yes	1.85703
CORO1A	CORO1A	CORO1A	chr16:30194730-30200575	ctrl	dox	OK	0.617821	2.264	1.87361	2.09881	0.00085	0.00846464	yes	1.85681
FHL3	FHL3	FHL3	chr1:38462441-38471187	ctrl	dox	OK	1.56003	5.6761	1.86332	2.49163	0.00025	0.00312152	yes	1.85665
PITPNM2	PITPNM2	PITPNM2	chr12:123468026-123594975	ctrl	dox	OK	1.1688	4.2583	1.86525	3.47728	5e-05	0.000758876	yes	1.85634
TENC1	TENC1	TENC1	chr12:53436972-53473204	ctrl	dox	OK	1.54792	5.61107	1.85795	2.18761	0.00215	0.0179634	yes	1.85122
MYO7A	MYO7A	MYO7A	chr11:76839309-76926286	ctrl	dox	OK	0.169379	0.63479	1.90602	2.18586	0.00065	0.00685708	yes	1.84582
FBLN2	FBLN2	FBLN2	chr3:13590624-13679922	ctrl	dox	OK	0.602917	2.18761	1.85933	2.43811	0.00035	0.00411812	yes	1.84217
EPCAM	EPCAM	EPCAM	chr2:47596286-47614167	ctrl	dox	OK	0.657688	2.383	1.8573	2.02628	0.00115	0.0108276	yes	1.84157
DNAH10	DNAH10	DNAH10	chr12:124247041-124420267	ctrl	dox	OK	0.109732	0.41867	1.93182	2.28697	0.0003	0.00361996	yes	1.84006
TNFRSF1B	TNFRSF1B	TNFRSF1B	chr1:12226999-12269277	ctrl	dox	OK	3.10192	11.115	1.84127	3.87741	5e-05	0.000758876	yes	1.83793
IL4R	IL4R	IL4R	chr16:27325229-27376099	ctrl	dox	OK	0.411166	1.49561	1.86294	2.15469	0.00045	0.00505616	yes	1.83789
BAIAP2L2	BAIAP2L2	BAIAP2L2	chr22:38480895-38506676	ctrl	dox	OK	0.376382	1.36953	1.86341	1.93484	0.00345	0.0259618	yes	1.83608
P2RX2	P2RX2	P2RX2	chr12:133195365-133198972	ctrl	dox	OK	0.172765	0.641443	1.89251	1.3703	0.00235	0.019302	yes	1.83365
ADAMTS17	ADAMTS17	ADAMTS17	chr15:100511642-100882183	ctrl	dox	OK	0.439486	1.58864	1.8539	2.53978	0.00025	0.00312152	yes	1.8305
SYTL3	SYTL3	SYTL3	chr6:159071045-159185908	ctrl	dox	OK	0.36036	1.30685	1.85858	2.02192	0.0017	0.0148388	yes	1.83009
NKX3-1	NKX3-1	NKX3-1	chr8:23536205-23540450	ctrl	dox	OK	1.14208	4.07409	1.83481	2.43318	0.00035	0.00411812	yes	1.82577
AQP6	AQP6	AQP6	chr12:50366619-50370922	ctrl	dox	OK	0.148994	0.553584	1.89355	1.73666	0.00485	0.0337919	yes	1.82566
TP73	TP73	TP73	chr1:3569128-3663937	ctrl	dox	OK	0.10228	0.387407	1.92132	1.64719	0.0002	0.00255224	yes	1.82352
OAS2	OAS2	OAS2	chr12:113416273-113449528	ctrl	dox	OK	2.18591	7.76071	1.82795	2.83782	5e-05	0.000758876	yes	1.82323
CLDN4	CLDN4	CLDN4	chr7:73245192-73247023	ctrl	dox	OK	9.53096	33.7094	1.82246	3.96394	5e-05	0.000758876	yes	1.82137
ANO7	ANO7	ANO7	chr2:242127923-242164791	ctrl	dox	OK	0.16706	0.615268	1.88085	1.55369	0.00395	0.0287717	yes	1.82024
BTBD16	BTBD16	BTBD16	chr10:124030820-124097676	ctrl	dox	OK	0.526215	1.88015	1.83712	1.91594	0.0041	0.0296001	yes	1.81762
TOR4A	TOR4A	TOR4A	chr9:140172279-140177093	ctrl	dox	OK	0.268444	0.968396	1.85098	1.96019	0.0036	0.0267874	yes	1.81303
ANK1	ANK1	ANK1	chr8:41510743-41754280	ctrl	dox	OK	0.0190317	0.0915177	2.26565	0.764221	0.005	0.0345954	yes	1.80603
FAM102A	FAM102A	FAM102A	chr9:130702860-130742812	ctrl	dox	OK	5.77365	20.174	1.80494	4.26915	5e-05	0.000758876	yes	1.80316
HES4	HES4	HES4	chr1:934341-935552	ctrl	dox	OK	4.19948	14.6772	1.80529	2.71352	0.0001	0.00140493	yes	1.80285
TMEM176B	TMEM176B	TMEM176B	chr7:150488375-150502208	ctrl	dox	OK	0.54157	1.91285	1.8205	1.81957	0.0036	0.0267874	yes	1.80163
ATP6V0A4	ATP6V0A4	ATP6V0A4	chr7:138391038-138490769	ctrl	dox	OK	12.7487	44.4071	1.80044	4.5132	5e-05	0.000758876	yes	1.79963
MYO7B	MYO7B	MYO7B	chr2:128293377-128395303	ctrl	dox	OK	0.178518	0.645516	1.85438	2.1537	0.0005	0.00552122	yes	1.79793
ZNF876P	ZNF876P	ZNF876P	chr4:206388-249773	ctrl	dox	OK	0.305207	1.08397	1.82846	1.83757	0.003	0.0233485	yes	1.7952
ATP2B4	ATP2B4	ATP2B4	chr1:203595914-203713209	ctrl	dox	OK	6.92875	23.9992	1.79232	4.89749	5e-05	0.000758876	yes	1.79084
KCTD11	KCTD11	KCTD11	chr17:7255207-7258262	ctrl	dox	OK	1.75954	6.10611	1.79506	2.93384	5e-05	0.000758876	yes	1.78924
IFITM10	IFITM10	IFITM10	chr11:1753639-1771824	ctrl	dox	OK	4.15356	14.3606	1.78969	3.76003	5e-05	0.000758876	yes	1.78723
SHISA4	SHISA4	SHISA4	chr1:201857796-201861715	ctrl	dox	OK	9.60856	33.1882	1.78828	3.77223	5e-05	0.000758876	yes	1.78721
VPS37D	VPS37D	VPS37D	chr7:73082173-73086440	ctrl	dox	OK	0.9041	3.13847	1.79551	2.19697	0.00045	0.00505616	yes	1.78423
PLAT	PLAT	PLAT	chr8:42032235-42065194	ctrl	dox	OK	50.4806	173.892	1.78439	5.10046	5e-05	0.000758876	yes	1.78419
FBXO36	FBXO36	FBXO36	chr2:230787206-230877825	ctrl	dox	OK	0.422756	1.48029	1.80799	1.86916	0.00405	0.0293572	yes	1.78397
KALRN	KALRN	KALRN	chr3:123813557-124440036	ctrl	dox	OK	0.429048	1.50045	1.80619	1.99564	0.0011	0.0104944	yes	1.78253
TRO	TRO	TRO	chrX:54946995-54957866	ctrl	dox	OK	8.95245	30.7959	1.78238	4.41832	5e-05	0.000758876	yes	1.78124
EPSTI1	EPSTI1	EPSTI1	chr13:43460523-43566407	ctrl	dox	OK	0.491759	1.7128	1.80033	2.07157	0.00115	0.0108276	yes	1.77969
B3GALT4	B3GALT4	B3GALT4	chr6_qbl_hap6:4477155-4478841	ctrl	dox	OK	0.400853	1.39865	1.80289	1.82103	0.0056	0.0378284	yes	1.77762
SHISA8	SHISA8	SHISA8	chr22:42305557-42310671	ctrl	dox	OK	0.276184	0.970075	1.81246	1.61223	0.00695	0.0448552	yes	1.77595
ANPEP	ANPEP	ANPEP	chr15:90328125-90358072	ctrl	dox	OK	0.106489	0.387761	1.86446	1.7075	0.0054	0.0368658	yes	1.77171
LOXL3	LOXL3	LOXL3	chr2:74753774-74784678	ctrl	dox	OK	16.0858	54.7969	1.7683	2.72824	0.0001	0.00140493	yes	1.76767
COL5A3	COL5A3	COL5A3	chr19:10070236-10121147	ctrl	dox	OK	0.320627	1.11225	1.79452	2.23602	0.00065	0.00685708	yes	1.76312
HR	HR	HR	chr8:21971931-21988565	ctrl	dox	OK	13.8518	46.9112	1.75985	4.75767	5e-05	0.000758876	yes	1.75913
LOC729737	LOC729737	LOC729737	chr1:134772-140566	ctrl	dox	OK	0.236276	0.823015	1.80044	2.06712	0.0017	0.0148388	yes	1.75807
CHMP4C	CHMP4C	CHMP4C	chr8:82644687-82671748	ctrl	dox	OK	1.22093	4.15282	1.76611	2.30137	0.00015	0.001995	yes	1.75781
TSPAN9	TSPAN9	TSPAN9	chr12:3186520-3395730	ctrl	dox	OK	4.71159	15.9422	1.75857	3.99512	5e-05	0.000758876	yes	1.75641
SRPK3	SRPK3	SRPK3	chrX:153046455-153051187	ctrl	dox	OK	0.194964	0.682244	1.80708	1.66531	0.0043	0.0307228	yes	1.75591
PTPRN	PTPRN	PTPRN	chr2:220154344-220174295	ctrl	dox	OK	1.34805	4.57522	1.76297	2.5918	0.0001	0.00140493	yes	1.75545
RELT	RELT	RELT	chr11:73087404-73108519	ctrl	dox	OK	4.42743	14.9573	1.75631	3.69075	5e-05	0.000758876	yes	1.75402
BMPER	BMPER	BMPER	chr7:33944522-34195484	ctrl	dox	OK	0.179074	0.627165	1.80829	1.78914	0.0028	0.0221471	yes	1.75272
TACC2	TACC2	TACC2	chr10:123748688-124014060	ctrl	dox	OK	0.347143	1.19273	1.78067	1.97444	0.00145	0.01305	yes	1.75174
MIEF2	MIEF2	MIEF2	chr17:18163847-18169095	ctrl	dox	OK	1.81087	6.12015	1.75688	2.78133	0.00015	0.001995	yes	1.75129
CD82	CD82	CD82	chr11:44587140-44641315	ctrl	dox	OK	4.21753	14.2201	1.75347	3.04187	5e-05	0.000758876	yes	1.75106
SDK2	SDK2	SDK2	chr17:71330522-71640227	ctrl	dox	OK	0.0401129	0.158264	1.9802	1.89038	0.00515	0.035442	yes	1.74747
IFFO2	IFFO2	IFFO2	chr1:19230773-19282826	ctrl	dox	OK	11.1629	37.5029	1.74828	4.8827	5e-05	0.000758876	yes	1.74738
ULBP2	ULBP2	ULBP2	chr6:150263135-150270368	ctrl	dox	OK	2.28127	7.66838	1.74909	2.28997	0.0002	0.00255224	yes	1.74465
KIAA1522	KIAA1522	KIAA1522	chr1:33207511-33240571	ctrl	dox	OK	0.806089	2.72428	1.75686	2.19558	0.0005	0.00552122	yes	1.74436
SCN8A	SCN8A	SCN8A	chr12:51985019-52206648	ctrl	dox	OK	0.416422	1.4173	1.76702	2.75208	5e-05	0.000758876	yes	1.74293
NFE2	NFE2	NFE2	chr12:54685890-54694821	ctrl	dox	OK	1.10556	3.7108	1.74695	2.23479	0.00045	0.00505616	yes	1.73784
SERPINA5	SERPINA5	SERPINA5	chr14:95047705-95059457	ctrl	dox	OK	16.5949	55.294	1.73638	4.52237	5e-05	0.000758876	yes	1.73577
FSCN1	FSCN1	FSCN1	chr7:5632435-5646287	ctrl	dox	OK	18.4884	61.5515	1.73517	4.22757	5e-05	0.000758876	yes	1.73463
TLDC1	TLDC1	TLDC1	chr16:84509965-84538288	ctrl	dox	OK	6.40823	21.3304	1.73492	4.32776	5e-05	0.000758876	yes	1.73334
RAG1	RAG1	RAG1	chr11:36589562-36601310	ctrl	dox	OK	0.214027	0.733094	1.77621	1.9592	0.0023	0.0189695	yes	1.72987
RILP	RILP	RILP	chr17:1549444-1553392	ctrl	dox	OK	0.768064	2.57032	1.74265	1.97288	0.0019	0.0162527	yes	1.72959
BCORL1	BCORL1	BCORL1	chrX:129139163-129192058	ctrl	dox	OK	0.340402	1.15075	1.75727	2.37085	0.00015	0.001995	yes	1.72797
PTPRE	PTPRE	PTPRE	chr10:129705324-129884164	ctrl	dox	OK	4.27982	14.1616	1.72637	3.50143	5e-05	0.000758876	yes	1.72401
HOXA11	HOXA11	HOXA11	chr7:27220775-27224835	ctrl	dox	OK	0.17664	0.605774	1.77797	1.69703	0.00575	0.0386093	yes	1.72214
MMP14	MMP14	MMP14	chr14:23305741-23316808	ctrl	dox	OK	83.1046	273.976	1.72105	4.63668	5e-05	0.000758876	yes	1.72093
PDLIM7	PDLIM7	PDLIM7	chr5:176910394-176924606	ctrl	dox	OK	17.7184	58.3727	1.72004	4.08	5e-05	0.000758876	yes	1.71948
B3GALNT1	B3GALNT1	B3GALNT1	chr3:160801670-160823160	ctrl	dox	OK	0.169086	0.579598	1.77729	1.378	0.0079	0.0497002	yes	1.71908
SEMA6C	SEMA6C	SEMA6C	chr1:151104162-151119140	ctrl	dox	OK	0.314042	1.05624	1.74991	1.86384	0.0036	0.0267874	yes	1.71828
PWWP2B	PWWP2B	PWWP2B	chr10:134210701-134231358	ctrl	dox	OK	1.24873	4.13087	1.72598	2.56185	0.0001	0.00140493	yes	1.71797
S100A1	S100A1	S100A1	chr1:153591275-153618782	ctrl	dox	OK	55.7047	183.068	1.7165	1.91882	0.0025	0.0203111	yes	1.71633
TNKS1BP1	TNKS1BP1	TNKS1BP1	chr11:57067102-57092413	ctrl	dox	OK	3.65992	12.0415	1.71813	4.08215	5e-05	0.000758876	yes	1.71539
PTPRB	PTPRB	PTPRB	chr12:70910631-71031220	ctrl	dox	OK	0.0323991	0.129036	1.99375	1.6391	0.00575	0.0386093	yes	1.71335
PLEKHO1	PLEKHO1	PLEKHO1	chr1:150122169-150131825	ctrl	dox	OK	3.32154	10.9132	1.71616	2.98924	5e-05	0.000758876	yes	1.71313
COL9A3	COL9A3	COL9A3	chr20:61448413-61493115	ctrl	dox	OK	140.208	459.049	1.71107	4.61316	5e-05	0.000758876	yes	1.71101
GMFG	GMFG	GMFG	chr19:39818998-39826726	ctrl	dox	OK	4.48474	14.6645	1.70923	2.24785	0.00035	0.00411812	yes	1.707
SLC2A1	SLC2A1	SLC2A1	chr1:43391045-43449029	ctrl	dox	OK	52.1935	169.829	1.70214	4.99199	5e-05	0.000758876	yes	1.70195
CSRNP1	CSRNP1	CSRNP1	chr3:39183341-39195102	ctrl	dox	OK	13.5376	44.0058	1.70073	4.50765	5e-05	0.000758876	yes	1.69998
SCARF2	SCARF2	SCARF2	chr22:20778873-20792146	ctrl	dox	OK	1.5183	4.93627	1.70097	2.79614	0.0001	0.00140493	yes	1.69441
LIMK2	LIMK2	LIMK2	chr22:31608249-31676066	ctrl	dox	OK	7.92236	25.6623	1.69565	4.19935	5e-05	0.000758876	yes	1.69439
CLCN2	CLCN2	CLCN2	chr3:184053716-184079439	ctrl	dox	OK	6.9362	22.3716	1.68945	3.2122	5e-05	0.000758876	yes	1.68802
ADM2	ADM2	ADM2	chr22:50919984-50924866	ctrl	dox	OK	0.182221	0.60935	1.74158	1.82219	0.0066	0.0430138	yes	1.68799
PRKCZ	PRKCZ	PRKCZ	chr1:1981908-2144159	ctrl	dox	OK	9.89228	31.8806	1.6883	3.42658	5e-05	0.000758876	yes	1.6873
ASS1	ASS1	ASS1	chr9:133320093-133376661	ctrl	dox	OK	1.15411	3.73896	1.69586	2.24323	0.0004	0.00458914	yes	1.68726
ARHGEF3	ARHGEF3	ARHGEF3	chr3:56761445-57113336	ctrl	dox	OK	2.55359	8.23097	1.68853	3.04671	5e-05	0.000758876	yes	1.68465
SLC6A10P	SLC6A10P	SLC6A10P	chr16:32888796-32896463	ctrl	dox	OK	0.12801	0.432438	1.75624	1.66656	0.0045	0.0318226	yes	1.6807
COL7A1	COL7A1	COL7A1	chr3:48601505-48632593	ctrl	dox	OK	0.585633	1.89097	1.69105	2.89956	5e-05	0.000758876	yes	1.67424
BLACAT1	BLACAT1	BLACAT1	chr1:205404013-205425214	ctrl	dox	OK	0.661121	2.12484	1.68436	2.01845	0.00075	0.007695	yes	1.66948
TP53INP1	TP53INP1	TP53INP1	chr8:95938199-95961615	ctrl	dox	OK	1.59908	5.09066	1.67061	2.75387	5e-05	0.000758876	yes	1.66445
TMEM121	TMEM121	TMEM121	chr14:105992952-105996539	ctrl	dox	OK	5.14196	16.3173	1.66601	2.93015	5e-05	0.000758876	yes	1.66409
IKBKE	IKBKE	IKBKE	chr1:206643585-206670223	ctrl	dox	OK	2.21775	7.04681	1.66788	3.05461	5e-05	0.000758876	yes	1.66343
TFEB	TFEB	TFEB	chr6:41651715-41703997	ctrl	dox	OK	0.489738	1.56927	1.68001	1.87795	0.00155	0.0137569	yes	1.66001
SIX4	SIX4	SIX4	chr14:61176255-61190852	ctrl	dox	OK	0.150129	0.49596	1.72402	1.81599	0.00315	0.0242012	yes	1.65979
HPCAL4	HPCAL4	HPCAL4	chr1:40144319-40157382	ctrl	dox	OK	0.885785	2.8147	1.66796	2.36807	0.0001	0.00140493	yes	1.65687
TPPP3	TPPP3	TPPP3	chr16:67423709-67427438	ctrl	dox	OK	0.983437	3.10462	1.65851	1.85527	0.0039	0.0284884	yes	1.64856
SLC31A2	SLC31A2	SLC31A2	chr9:115913237-115926422	ctrl	dox	OK	7.50932	23.4712	1.64414	3.28874	5e-05	0.000758876	yes	1.64283
CX3CL1	CX3CL1	CX3CL1	chr16:57406413-57418956	ctrl	dox	OK	2.25087	7.04969	1.64708	2.82038	5e-05	0.000758876	yes	1.64273
KIAA1614	KIAA1614	KIAA1614	chr1:180882312-180915239	ctrl	dox	OK	0.0871579	0.293264	1.7505	1.64503	0.0077	0.0487839	yes	1.64217
TBKBP1	TBKBP1	TBKBP1	chr17:45772629-45789429	ctrl	dox	OK	0.704396	2.21857	1.65517	2.32996	0.00015	0.001995	yes	1.64132
CDC42EP2	CDC42EP2	CDC42EP2	chr11:65082288-65089900	ctrl	dox	OK	1.89919	5.94008	1.6451	2.34098	0.00025	0.00312152	yes	1.63995
PLAC1	PLAC1	PLAC1	chrX:133699872-133792513	ctrl	dox	OK	3.25475	10.1619	1.64256	2.18306	0.0008	0.00807874	yes	1.63954
GALNT5	GALNT5	GALNT5	chr2:158114339-158167913	ctrl	dox	OK	0.216253	0.693678	1.68154	1.70236	0.00435	0.0309938	yes	1.63698
SESN2	SESN2	SESN2	chr1:28585962-28609002	ctrl	dox	OK	3.62727	11.2833	1.63723	3.43516	5e-05	0.000758876	yes	1.63454
GADD45B	GADD45B	GADD45B	chr19:2476122-2478257	ctrl	dox	OK	13.1797	40.8102	1.63061	3.71597	5e-05	0.000758876	yes	1.62987
ATP10A	ATP10A	ATP10A	chr15:25923859-26108349	ctrl	dox	OK	0.859698	2.68149	1.64114	2.55356	0.0001	0.00140493	yes	1.62982
SRRM3	SRRM3	SRRM3	chr7:75831210-75916609	ctrl	dox	OK	0.724754	2.26125	1.64155	2.25783	0.00035	0.00411812	yes	1.62815
RASGRF1	RASGRF1	RASGRF1	chr15:79252288-79383215	ctrl	dox	OK	1.60033	4.95518	1.63057	2.95598	5e-05	0.000758876	yes	1.62449
PECAM1	PECAM1	PECAM1	chr17:62396776-62407083	ctrl	dox	OK	0.136397	0.441108	1.69332	1.67316	0.00495	0.0343023	yes	1.62359
MXRA8	MXRA8	MXRA8	chr1:1288068-1298921	ctrl	dox	OK	0.680336	2.11566	1.63679	1.9583	0.0006	0.00643164	yes	1.62254
IL6R	IL6R	IL6R	chr1:154377668-154441926	ctrl	dox	OK	4.1191	12.6929	1.62362	3.20021	5e-05	0.000758876	yes	1.62126
IGSF8	IGSF8	IGSF8	chr1:160061128-160068618	ctrl	dox	OK	61.5752	188.318	1.61275	4.80689	5e-05	0.000758876	yes	1.61259
MXD1	MXD1	MXD1	chr2:70142172-70170076	ctrl	dox	OK	0.994025	3.05826	1.62136	2.47565	0.00015	0.001995	yes	1.61163
EFCAB4A	EFCAB4A	EFCAB4A	chr11:828259-831991	ctrl	dox	OK	0.550819	1.70319	1.62859	1.72371	0.0063	0.0415259	yes	1.61108
PHLDB1	PHLDB1	PHLDB1	chr11:118477212-118528748	ctrl	dox	OK	8.7744	26.7856	1.61008	4.25315	5e-05	0.000758876	yes	1.60898
OBSCN	OBSCN	OBSCN	chr1:228391206-228566575	ctrl	dox	OK	0.058137	0.197569	1.76483	1.97393	0.0021	0.0176772	yes	1.60708
ZC3H12A	ZC3H12A	ZC3H12A	chr1:37940118-37949978	ctrl	dox	OK	0.933166	2.8611	1.61636	2.1181	0.00095	0.00928033	yes	1.60602
COL9A1	COL9A1	COL9A1	chr6:70925742-71012786	ctrl	dox	OK	1.4479	4.42507	1.61173	2.3624	0.0002	0.00255224	yes	1.60507
GRB7	GRB7	GRB7	chr17:37894161-37903538	ctrl	dox	OK	0.651562	2.00242	1.61977	1.82708	0.00205	0.017305	yes	1.60498
C19orf26	C19orf26	C19orf26	chr19:1229946-1237990	ctrl	dox	OK	1.07733	3.29021	1.61072	2.27773	0.00015	0.001995	yes	1.60177
MT1F	MT1F	MT1F	chr16:56691854-56693215	ctrl	dox	OK	3.78675	11.5054	1.60328	1.73975	0.00425	0.0304504	yes	1.60073
ANKAR	ANKAR	ANKAR	chr2:190540710-190611376	ctrl	dox	OK	0.367412	1.13119	1.62237	1.84362	0.003	0.0233485	yes	1.59633
KCNN4	KCNN4	KCNN4	chr19:44270684-44285409	ctrl	dox	OK	11.2898	34.124	1.59577	3.70884	5e-05	0.000758876	yes	1.59491
THBS3	THBS3	THBS3	chr1:155165378-155177772	ctrl	dox	OK	2.45147	7.42325	1.5984	2.88835	5e-05	0.000758876	yes	1.59447
KIAA0195	KIAA0195	KIAA0195	chr17:73452663-73511664	ctrl	dox	OK	5.44486	16.4546	1.59552	3.70768	5e-05	0.000758876	yes	1.59375
CYGB	CYGB	CYGB	chr17:74523429-74541458	ctrl	dox	OK	1.20717	3.65224	1.59715	1.96393	0.00355	0.0265474	yes	1.5892
GDF1	GDF1	GDF1	chr19:18979354-19007536	ctrl	dox	OK	2.04091	6.15729	1.59308	1.85938	0.00295	0.0230393	yes	1.58837
RASA4	RASA4	RASA4	chr7:102220092-102257205	ctrl	dox	OK	0.813552	2.46632	1.60005	2.4889	5e-05	0.000758876	yes	1.58827
ELOVL7	ELOVL7	ELOVL7	chr5:60047615-60140101	ctrl	dox	OK	3.56221	10.7167	1.58902	2.97681	5e-05	0.000758876	yes	1.58632
MTMR11	MTMR11	MTMR11	chr1:149900542-149908791	ctrl	dox	OK	0.720658	2.17689	1.59488	1.98711	0.00115	0.0108276	yes	1.58161
LOXL2	LOXL2	LOXL2	chr8:23154409-23261722	ctrl	dox	OK	11.8396	35.4413	1.58181	4.2269	5e-05	0.000758876	yes	1.581
BRSK1	BRSK1	BRSK1	chr19:55795533-55823903	ctrl	dox	OK	7.78797	23.2735	1.57937	3.72812	5e-05	0.000758876	yes	1.57814
DDAH2	DDAH2	DDAH2	chr6_ssto_hap7:3025633-3028856	ctrl	dox	OK	16.5905	49.3778	1.5735	3.69997	5e-05	0.000758876	yes	1.57293
SMO	SMO	SMO	chr7:128828712-128853385	ctrl	dox	OK	0.51908	1.56044	1.58792	1.78934	0.0061	0.04058	yes	1.56961
DIRAS1	DIRAS1	DIRAS1	chr19:2714564-2721390	ctrl	dox	OK	1.87449	5.5814	1.57413	2.72847	5e-05	0.000758876	yes	1.56904
STMN3	STMN3	STMN3	chr20:62271057-62284963	ctrl	dox	OK	1.25529	3.74395	1.57654	2.10372	0.0011	0.0104944	yes	1.56894
SERINC5	SERINC5	SERINC5	chr5:79407049-79551898	ctrl	dox	OK	7.7812	23.0307	1.56549	3.9569	5e-05	0.000758876	yes	1.56427
INADL	INADL	INADL	chr1:62208148-62629591	ctrl	dox	OK	0.558737	1.67175	1.58111	2.4061	5e-05	0.000758876	yes	1.56413
NIPAL4	NIPAL4	NIPAL4	chr5:156887026-156901730	ctrl	dox	OK	0.276854	0.834364	1.59155	1.66428	0.0052	0.0357313	yes	1.55755
PLK3	PLK3	PLK3	chr1:45266035-45272957	ctrl	dox	OK	3.94	11.6146	1.55968	2.88202	5e-05	0.000758876	yes	1.55726
SLC4A3	SLC4A3	SLC4A3	chr2:220492291-220506702	ctrl	dox	OK	0.700363	2.07974	1.57023	2.19865	0.00075	0.007695	yes	1.5567
KRT14	KRT14	KRT14	chr17:39738530-39743147	ctrl	dox	OK	1.60797	4.74913	1.56242	2.1975	0.00065	0.00685708	yes	1.55651
SH3BGR	SH3BGR	SH3BGR	chr21:40817796-40887433	ctrl	dox	OK	1.4437	4.26487	1.56273	1.74463	0.00455	0.0320751	yes	1.55615
ARHGAP31	ARHGAP31	ARHGAP31	chr3:119013219-119138323	ctrl	dox	OK	6.7659	19.8997	1.5564	4.28035	5e-05	0.000758876	yes	1.55499
EMBP1	EMBP1	EMBP1	chr1:121260909-121313686	ctrl	dox	OK	0.34191	1.02393	1.58243	1.72199	0.00445	0.0315311	yes	1.55486
CDC42BPG	CDC42BPG	CDC42BPG	chr11:64591661-64612041	ctrl	dox	OK	0.918944	2.71348	1.56209	2.44936	5e-05	0.000758876	yes	1.55179
ZNF85	ZNF85	ZNF85	chr19:21106058-21133503	ctrl	dox	OK	10.8747	31.897	1.55245	3.05121	5e-05	0.000758876	yes	1.55157
FMNL1	FMNL1	FMNL1	chr17:43299291-43324683	ctrl	dox	OK	0.428944	1.2751	1.57176	1.89544	0.0032	0.0245015	yes	1.54977
NAV2	NAV2	NAV2	chr11:19372270-20143147	ctrl	dox	OK	1.74624	5.11726	1.55112	3.30791	5e-05	0.000758876	yes	1.5457
TGFB1I1	TGFB1I1	TGFB1I1	chr16:31483475-31489281	ctrl	dox	OK	1.33739	3.91952	1.55126	1.99841	0.00125	0.0116048	yes	1.54419
TUBA8	TUBA8	TUBA8	chr22:18593452-18614498	ctrl	dox	OK	0.3245	0.964669	1.57182	1.6215	0.00695	0.0448552	yes	1.54291
PLEC	PLEC	PLEC	chr8:144989314-145050913	ctrl	dox	OK	39.8452	115.754	1.53858	3.99639	5e-05	0.000758876	yes	1.53835
PLCD1	PLCD1	PLCD1	chr3:38048986-38071154	ctrl	dox	OK	2.41451	7.01497	1.53871	2.7596	5e-05	0.000758876	yes	1.5348
CDH24	CDH24	CDH24	chr14:23516269-23526747	ctrl	dox	OK	1.06597	3.10549	1.54266	2.23072	0.0004	0.00458914	yes	1.53382
KLHDC1	KLHDC1	KLHDC1	chr14:50159822-50219870	ctrl	dox	OK	0.537981	1.57644	1.55104	1.66085	0.00765	0.0485699	yes	1.5336
POLE	POLE	POLE	chr12:133200347-133264110	ctrl	dox	OK	15.0981	43.693	1.53304	4.3486	5e-05	0.000758876	yes	1.53241
MAPKBP1	MAPKBP1	MAPKBP1	chr15:42066631-42120053	ctrl	dox	OK	3.60058	10.4207	1.53315	3.60105	5e-05	0.000758876	yes	1.53053
GPSM3	GPSM3	GPSM3	chr6_ssto_hap7:3506268-3539573	ctrl	dox	OK	5.43361	15.706	1.53134	2.62458	5e-05	0.000758876	yes	1.5296
ELN	ELN	ELN	chr7:73442118-73484236	ctrl	dox	OK	0.103398	0.317376	1.61798	1.18763	0.0029	0.0227378	yes	1.52955
RAPGEF3	RAPGEF3	RAPGEF3	chr12:48128452-48152889	ctrl	dox	OK	0.42565	1.2449	1.54829	2.14093	0.00045	0.00505616	yes	1.52633
YPEL2	YPEL2	YPEL2	chr17:57409052-57479095	ctrl	dox	OK	1.31659	3.80029	1.5293	2.49009	5e-05	0.000758876	yes	1.52218
ITPK1	ITPK1	ITPK1	chr14:93403258-93582263	ctrl	dox	OK	20.4603	58.7065	1.52069	4.20135	5e-05	0.000758876	yes	1.52023
GRIN2D	GRIN2D	GRIN2D	chr19:48898131-48948188	ctrl	dox	OK	0.163728	0.487598	1.57439	1.66478	0.0079	0.0497002	yes	1.51815
WTIP	WTIP	WTIP	chr19:34972879-34992085	ctrl	dox	OK	2.54105	7.29637	1.52176	2.3135	0.00045	0.00505616	yes	1.51806
LMF1	LMF1	LMF1	chr16:903634-1031318	ctrl	dox	OK	1.36084	3.91234	1.52353	2.00818	0.0015	0.0134059	yes	1.51665
CREG1	CREG1	CREG1	chr1:167510250-167523056	ctrl	dox	OK	32.5577	93.1079	1.51591	4.08465	5e-05	0.000758876	yes	1.51562
SPPL3	SPPL3	SPPL3	chr12:121200312-121342155	ctrl	dox	OK	6.52258	18.6335	1.51439	3.54216	5e-05	0.000758876	yes	1.51295
CPN1	CPN1	CPN1	chr10:101802064-101841642	ctrl	dox	OK	5.63872	16.1079	1.51433	2.85194	5e-05	0.000758876	yes	1.51267
MROH6	MROH6	MROH6	chr8:144648362-144654928	ctrl	dox	OK	0.874393	2.51293	1.52302	2.04524	0.0004	0.00458914	yes	1.51234
DGKA	DGKA	DGKA	chr12:56324945-56347807	ctrl	dox	OK	0.660341	1.90071	1.52526	1.85676	0.00215	0.0179634	yes	1.51114
MIDN	MIDN	MIDN	chr19:1248551-1259142	ctrl	dox	OK	2.69171	7.67787	1.51218	2.8378	5e-05	0.000758876	yes	1.50871
ITPRIP	ITPRIP	ITPRIP	chr10:106069453-106098251	ctrl	dox	OK	2.76156	7.87349	1.51152	3.41438	5e-05	0.000758876	yes	1.50814
SLC25A37	SLC25A37	SLC25A37	chr8:23386362-23430063	ctrl	dox	OK	8.56707	24.3193	1.50523	3.18933	5e-05	0.000758876	yes	1.50414
ARSI	ARSI	ARSI	chr5:149675908-149682525	ctrl	dox	OK	0.491963	1.40866	1.5177	1.75232	0.00445	0.0315311	yes	1.49888
CSRP2	CSRP2	CSRP2	chr12:77252495-77272799	ctrl	dox	OK	13.9729	39.4995	1.4992	2.94723	5e-05	0.000758876	yes	1.49854
RPS6KA1	RPS6KA1	RPS6KA1	chr1:26856248-26901520	ctrl	dox	OK	19.3359	54.6389	1.49864	4.21909	5e-05	0.000758876	yes	1.49816
ROPN1L	ROPN1L	ROPN1L	chr5:10441973-10465138	ctrl	dox	OK	3.51389	9.93946	1.5001	2.02853	0.00115	0.0108276	yes	1.49745
AEBP1	AEBP1	AEBP1	chr7:44143959-44154164	ctrl	dox	OK	1.68568	4.77014	1.5007	2.68578	5e-05	0.000758876	yes	1.49519
LRRC73	LRRC73	LRRC73	chr6:43474702-43478081	ctrl	dox	OK	0.871107	2.46497	1.50065	1.80536	0.0055	0.0373638	yes	1.49002
ZSWIM4	ZSWIM4	ZSWIM4	chr19:13906273-13943044	ctrl	dox	OK	1.18474	3.33981	1.49519	2.41676	0.00015	0.001995	yes	1.48738
TCP11L2	TCP11L2	TCP11L2	chr12:106696568-106740792	ctrl	dox	OK	1.66964	4.69076	1.49028	2.02176	0.0012	0.0112102	yes	1.48474
SCUBE2	SCUBE2	SCUBE2	chr11:9041046-9113150	ctrl	dox	OK	0.910367	2.56509	1.49449	2.14389	0.00075	0.007695	yes	1.48434
MYH14	MYH14	MYH14	chr19:50706884-50813801	ctrl	dox	OK	4.27665	11.9822	1.48635	3.84826	5e-05	0.000758876	yes	1.48417
MARCKSL1	MARCKSL1	MARCKSL1	chr1:32799429-32801840	ctrl	dox	OK	49.5053	137.308	1.47176	4.20502	5e-05	0.000758876	yes	1.47157
LOC440300	LOC440300	LOC440300	chr15:84860599-84898920	ctrl	dox	OK	0.792143	2.21358	1.48255	1.85917	0.006	0.0400334	yes	1.47095
FAM83G	FAM83G	FAM83G	chr17:18853988-18950336	ctrl	dox	OK	1.97477	5.49074	1.47532	2.4939	5e-05	0.000758876	yes	1.47065
LTBP3	LTBP3	LTBP3	chr11:65292547-65325699	ctrl	dox	OK	4.37524	12.1202	1.46997	2.32505	0.0001	0.00140493	yes	1.46788
SPAG4	SPAG4	SPAG4	chr20:34203808-34208965	ctrl	dox	OK	1.15817	3.21576	1.47331	1.7783	0.0029	0.0227378	yes	1.46539
PODXL	PODXL	PODXL	chr7:131185020-131241376	ctrl	dox	OK	4.18332	11.5494	1.4651	3.45188	5e-05	0.000758876	yes	1.4629
CERCAM	CERCAM	CERCAM	chr9:131181438-131199630	ctrl	dox	OK	6.29829	17.3776	1.4642	3.09725	5e-05	0.000758876	yes	1.46274
HAPLN3	HAPLN3	HAPLN3	chr15:89420518-89438770	ctrl	dox	OK	4.43957	12.2512	1.46443	2.56514	5e-05	0.000758876	yes	1.46236
TSC22D3	TSC22D3	TSC22D3	chrX:106956451-107019017	ctrl	dox	OK	11.892	32.7391	1.46102	3.36116	5e-05	0.000758876	yes	1.46025
BTBD19	BTBD19	BTBD19	chr1:45274153-45279801	ctrl	dox	OK	2.57172	7.08648	1.46234	2.10834	0.00055	0.00600319	yes	1.45877
S100A13	S100A13	S100A13	chr1:153591275-153618782	ctrl	dox	OK	273.616	751.518	1.45765	3.4159	5e-05	0.000758876	yes	1.45762
CYLD	CYLD	CYLD	chr16:50775960-50835846	ctrl	dox	OK	6.21532	17.0869	1.45899	3.86421	5e-05	0.000758876	yes	1.45751
CDC42EP4	CDC42EP4	CDC42EP4	chr17:71279762-71308143	ctrl	dox	OK	10.687	29.3613	1.45806	3.66749	5e-05	0.000758876	yes	1.4572
FOSL2	FOSL2	FOSL2	chr2:28607275-28637516	ctrl	dox	OK	7.35837	20.1583	1.45392	3.57656	5e-05	0.000758876	yes	1.45267
ARHGEF40	ARHGEF40	ARHGEF40	chr14:21484921-21572863	ctrl	dox	OK	7.37838	20.1509	1.44947	3.43124	5e-05	0.000758876	yes	1.44823
FAHD2B	FAHD2B	FAHD2B	chr2:97749322-97760582	ctrl	dox	OK	1.89475	5.18494	1.45232	1.7689	0.0073	0.0466945	yes	1.44751
PROB1	PROB1	PROB1	chr5:138727634-138730885	ctrl	dox	OK	1.69274	4.62513	1.45013	2.35908	0.0004	0.00458914	yes	1.44475
2016-09-09	2016-09-09	2016-09-09	chr17:75277491-75496678	ctrl	dox	OK	82.4362	224.417	1.44483	4.13254	5e-05	0.000758876	yes	1.44472
ROPN1	ROPN1	ROPN1	chr3:123687878-123710199	ctrl	dox	OK	9.21499	25.0584	1.44324	2.62684	5e-05	0.000758876	yes	1.44225
CHST1	CHST1	CHST1	chr11:45669238-45687206	ctrl	dox	OK	1.43793	3.92404	1.44834	2.20801	0.00025	0.00312152	yes	1.44202
SLC2A10	SLC2A10	SLC2A10	chr20:45338278-45364985	ctrl	dox	OK	2.95569	8.04686	1.44493	2.75457	5e-05	0.000758876	yes	1.44185
NFE2L3	NFE2L3	NFE2L3	chr7:26191846-26226756	ctrl	dox	OK	39.8776	108.3	1.44138	4.18763	5e-05	0.000758876	yes	1.44115
PPP1R18	PPP1R18	PPP1R18	chr6_ssto_hap7:1976469-1979473	ctrl	dox	OK	9.80227	26.62	1.44132	3.67941	5e-05	0.000758876	yes	1.44039
SULT1A1	SULT1A1	SULT1A1	chr16:28616907-28634907	ctrl	dox	OK	0.911826	2.48999	1.44931	1.64099	0.0068	0.0440455	yes	1.43936
CTSB	CTSB	CTSB	chr8:11700033-11725646	ctrl	dox	OK	86.8994	235.484	1.43821	3.99034	5e-05	0.000758876	yes	1.43811
CPNE5	CPNE5	CPNE5	chr6:36708554-36807220	ctrl	dox	OK	0.434131	1.19316	1.45858	1.6687	0.00655	0.04275	yes	1.43777
IRF9	IRF9	IRF9	chr14:24630421-24635774	ctrl	dox	OK	8.62775	23.3643	1.43725	2.96261	5e-05	0.000758876	yes	1.4362
SERPINA1	SERPINA1	SERPINA1	chr14:94843083-94857029	ctrl	dox	OK	3.64643	9.88028	1.43807	2.90399	5e-05	0.000758876	yes	1.43558
CNTNAP1	CNTNAP1	CNTNAP1	chr17:40834631-40852011	ctrl	dox	OK	0.741294	2.02151	1.44732	2.05647	0.00125	0.0116048	yes	1.4351
UBN1	UBN1	UBN1	chr16:4897631-4932402	ctrl	dox	OK	16.3477	44.1862	1.43451	4.09558	5e-05	0.000758876	yes	1.43395
ST6GALNAC2	ST6GALNAC2	ST6GALNAC2	chr17:74561460-74582145	ctrl	dox	OK	7.64344	20.6443	1.43345	3.0029	5e-05	0.000758876	yes	1.43226
PCBP4	PCBP4	PCBP4	chr3:51989329-52001482	ctrl	dox	OK	38.1978	102.681	1.42661	3.99465	5e-05	0.000758876	yes	1.42637
RHBDF1	RHBDF1	RHBDF1	chr16:108057-122629	ctrl	dox	OK	12.0551	32.3974	1.42624	3.713	5e-05	0.000758876	yes	1.42548
AFAP1L1	AFAP1L1	AFAP1L1	chr5:148651400-148721367	ctrl	dox	OK	14.4509	38.8035	1.42503	3.93387	5e-05	0.000758876	yes	1.4244
CERS1	CERS1	CERS1	chr19:18979354-19007536	ctrl	dox	OK	4.47216	12.0191	1.42628	2.37053	0.0002	0.00255224	yes	1.42426
OR4A16	OR4A16	OR4A16	chr11:55110676-55111663	ctrl	dox	OK	5.07237	13.6062	1.42354	1.88021	0.0036	0.0267874	yes	1.42175
PLXNB3	PLXNB3	PLXNB3	chrX:153029650-153044801	ctrl	dox	OK	2.26742	6.07791	1.42252	2.97419	5e-05	0.000758876	yes	1.41855
PC	PC	PC	chr11:66615996-66725847	ctrl	dox	OK	8.4491	22.5744	1.41782	2.90721	5e-05	0.000758876	yes	1.41675
MAP1B	MAP1B	MAP1B	chr5:71403117-71505397	ctrl	dox	OK	0.999005	2.67634	1.4217	2.81718	5e-05	0.000758876	yes	1.41271
CDKN1A	CDKN1A	CDKN1A	chr6:36644236-36655116	ctrl	dox	OK	11.1223	29.6276	1.41348	3.20326	5e-05	0.000758876	yes	1.41268
NFKBIE	NFKBIE	NFKBIE	chr6:44225902-44233525	ctrl	dox	OK	6.83158	18.1719	1.41142	3.10692	5e-05	0.000758876	yes	1.4101
HTRA1	HTRA1	HTRA1	chr10:124221040-124274424	ctrl	dox	OK	4.67574	12.4326	1.41086	2.65006	5e-05	0.000758876	yes	1.40894
C1QL4	C1QL4	C1QL4	chr12:49726199-49730971	ctrl	dox	OK	1.32763	3.5365	1.41347	1.8818	0.0034	0.0257365	yes	1.40672
STARD8	STARD8	STARD8	chrX:67867510-67945684	ctrl	dox	OK	2.19032	5.82075	1.41007	2.76667	5e-05	0.000758876	yes	1.40597
CCND1	CCND1	CCND1	chr11:69455872-69469242	ctrl	dox	OK	370.237	980.501	1.40507	3.16895	5e-05	0.000758876	yes	1.40505
SERTAD1	SERTAD1	SERTAD1	chr19:40928408-40931932	ctrl	dox	OK	14.3978	38.0498	1.40204	3.08698	5e-05	0.000758876	yes	1.40142
ALDH1A3	ALDH1A3	ALDH1A3	chr15:101420008-101456830	ctrl	dox	OK	35.9589	94.9409	1.40068	3.99055	5e-05	0.000758876	yes	1.40043
ZCCHC24	ZCCHC24	ZCCHC24	chr10:81142082-81205383	ctrl	dox	OK	8.96475	23.5827	1.3954	3.55583	5e-05	0.000758876	yes	1.3944
MCF2L	MCF2L	MCF2L	chr13:113623534-113754053	ctrl	dox	OK	1.41433	3.73349	1.4004	2.54232	5e-05	0.000758876	yes	1.3941
ABR	ABR	ABR	chr17:906757-1090616	ctrl	dox	OK	1.73214	4.55302	1.39426	2.51642	5e-05	0.000758876	yes	1.38913
EPHA2	EPHA2	EPHA2	chr1:16450831-16482582	ctrl	dox	OK	36.5947	95.8204	1.3887	3.98724	5e-05	0.000758876	yes	1.38845
LGMN	LGMN	LGMN	chr14:93170151-93215047	ctrl	dox	OK	26.5865	69.5758	1.38789	3.73749	5e-05	0.000758876	yes	1.38756
ITGA5	ITGA5	ITGA5	chr12:54747474-54867386	ctrl	dox	OK	17.7502	46.4219	1.38697	2.84362	5e-05	0.000758876	yes	1.38647
NUAK1	NUAK1	NUAK1	chr12:106457124-106533811	ctrl	dox	OK	3.63787	9.50334	1.38534	3.29429	5e-05	0.000758876	yes	1.3829
F12	F12	F12	chr5:176829138-176836577	ctrl	dox	OK	3.3533	8.73305	1.3809	2.39905	0.00025	0.00312152	yes	1.37826
SIK1	SIK1	SIK1	chr21:44834397-44847002	ctrl	dox	OK	2.30794	6.00069	1.37852	2.64399	5e-05	0.000758876	yes	1.37469
EHD1	EHD1	EHD1	chr11:64620198-64647185	ctrl	dox	OK	18.599	48.2435	1.37511	3.57798	5e-05	0.000758876	yes	1.37463
APOL2	APOL2	APOL2	chr22:36622254-36636000	ctrl	dox	OK	8.33085	21.5534	1.37138	3.21711	5e-05	0.000758876	yes	1.37032
HSPA1L	HSPA1L	HSPA1L	chr6_qbl_hap6:3071043-3076482	ctrl	dox	OK	0.688962	1.79535	1.38177	1.68482	0.0037	0.027384	yes	1.36899
SMARCD3	SMARCD3	SMARCD3	chr7:150936058-150974231	ctrl	dox	OK	1.28935	3.33295	1.37016	1.77483	0.00345	0.0259618	yes	1.36333
ANKRD20A8P	ANKRD20A8P	ANKRD20A8P	chr2:95421070-95522820	ctrl	dox	OK	0.937227	2.42272	1.37016	1.65654	0.00575	0.0386093	yes	1.36079
ABCA2	ABCA2	ABCA2	chr9:139901685-139931234	ctrl	dox	OK	0.699002	1.80359	1.36751	2.16309	0.0005	0.00552122	yes	1.35499
SEC14L2	SEC14L2	SEC14L2	chr22:30792929-30821291	ctrl	dox	OK	5.95911	15.2574	1.35634	2.77	5e-05	0.000758876	yes	1.35487
JAK3	JAK3	JAK3	chr19:17935592-17958841	ctrl	dox	OK	0.83153	2.13905	1.36313	2.05915	0.0014	0.0126955	yes	1.35261
SLC26A11	SLC26A11	SLC26A11	chr17:78194199-78227308	ctrl	dox	OK	2.37519	6.07933	1.35587	2.30137	0.0003	0.00361996	yes	1.35218
LYPD6	LYPD6	LYPD6	chr2:150186498-150330659	ctrl	dox	OK	1.5587	3.9862	1.35467	1.94361	0.00185	0.0159084	yes	1.34906
FAT2	FAT2	FAT2	chr5:150883652-150948505	ctrl	dox	OK	0.205197	0.537262	1.38862	1.92004	0.0015	0.0134059	yes	1.34657
S100A4	S100A4	S100A4	chr1:153516094-153518282	ctrl	dox	OK	105.582	267.657	1.34202	3.26619	5e-05	0.000758876	yes	1.34194
POLD4	POLD4	POLD4	chr11:67085309-67159158	ctrl	dox	OK	5.59321	14.1768	1.34179	2.35393	0.0001	0.00140493	yes	1.34022
FGFRL1	FGFRL1	FGFRL1	chr4:1005609-1020686	ctrl	dox	OK	13.9641	35.3643	1.34057	3.6351	5e-05	0.000758876	yes	1.33995
LINC00511	LINC00511	LINC00511	chr17:70594179-70636611	ctrl	dox	OK	8.36166	21.1811	1.34091	2.88238	5e-05	0.000758876	yes	1.33987
PPFIBP2	PPFIBP2	PPFIBP2	chr11:7534995-7674996	ctrl	dox	OK	5.97238	15.1222	1.34029	3.03869	5e-05	0.000758876	yes	1.33883
OLFML3	OLFML3	OLFML3	chr1:114522012-114524876	ctrl	dox	OK	2.59754	6.56638	1.33795	2.02992	0.0009	0.00885452	yes	1.3346
MCAM	MCAM	MCAM	chr11:119179233-119187840	ctrl	dox	OK	166.316	418.529	1.3314	2.57585	5e-05	0.000758876	yes	1.33135
RAB31	RAB31	RAB31	chr18:9708227-9862553	ctrl	dox	OK	7.6662	19.2913	1.33137	3.18446	5e-05	0.000758876	yes	1.33023
OPTN	OPTN	OPTN	chr10:13142081-13180276	ctrl	dox	OK	7.83962	19.6862	1.32833	3.22263	5e-05	0.000758876	yes	1.32722
TNIP1	TNIP1	TNIP1	chr5:150409503-150467221	ctrl	dox	OK	12.8294	32.1636	1.32598	3.3606	5e-05	0.000758876	yes	1.3253
EHD2	EHD2	EHD2	chr19:48216600-48246391	ctrl	dox	OK	1.05955	2.66649	1.33149	1.94621	0.0017	0.0148388	yes	1.32334
COL27A1	COL27A1	COL27A1	chr9:116918230-117072975	ctrl	dox	OK	0.682787	1.72298	1.3354	1.88769	0.0006	0.00643164	yes	1.32277
HDAC5	HDAC5	HDAC5	chr17:42154120-42201014	ctrl	dox	OK	10.7978	26.999	1.32217	3.68905	5e-05	0.000758876	yes	1.32137
TMEM8A	TMEM8A	TMEM8A	chr16:420775-431950	ctrl	dox	OK	34.7307	86.6795	1.31948	3.90081	5e-05	0.000758876	yes	1.31923
SAMD9L	SAMD9L	SAMD9L	chr7:92759367-92777680	ctrl	dox	OK	2.61381	6.52563	1.31997	2.85269	5e-05	0.000758876	yes	1.31666
MMP15	MMP15	MMP15	chr16:58059281-58080804	ctrl	dox	OK	9.43071	23.4992	1.31717	3.48564	5e-05	0.000758876	yes	1.31626
AGPAT1	AGPAT1	AGPAT1	chr6_ssto_hap7:3468303-3493616	ctrl	dox	OK	21.8684	54.4592	1.31633	2.23627	0.0001	0.00140493	yes	1.31593
PXMP2	PXMP2	PXMP2	chr12:133264191-133281577	ctrl	dox	OK	32.4389	80.7089	1.315	3.20198	5e-05	0.000758876	yes	1.31474
CTSV	CTSV	CTSV	chr9:99791958-99801925	ctrl	dox	OK	1.5348	3.81983	1.31546	2.1304	0.00085	0.00846464	yes	1.30986
SOCS3	SOCS3	SOCS3	chr17:76352857-76356160	ctrl	dox	OK	4.79072	11.8892	1.31133	2.6641	5e-05	0.000758876	yes	1.30954
MIER2	MIER2	MIER2	chr19:305574-344791	ctrl	dox	OK	2.9767	7.38686	1.31125	2.27497	0.0002	0.00255224	yes	1.30836
ANKRD33B	ANKRD33B	ANKRD33B	chr5:10564434-10657928	ctrl	dox	OK	0.557473	1.39117	1.31933	1.99896	0.00155	0.0137569	yes	1.30401
ZDBF2	ZDBF2	ZDBF2	chr2:207139364-207179150	ctrl	dox	OK	0.354595	0.889327	1.32654	1.72525	0.0049	0.0340215	yes	1.30255
GABBR1	GABBR1	GABBR1	chr6_qbl_hap6:873335-904294	ctrl	dox	OK	0.937217	2.32583	1.31129	1.85703	0.00305	0.0236148	yes	1.30217
MYEOV	MYEOV	MYEOV	chr11:69061621-69064754	ctrl	dox	OK	11.8842	29.3078	1.30224	2.77145	5e-05	0.000758876	yes	1.30152
SLC29A4	SLC29A4	SLC29A4	chr7:5322560-5343704	ctrl	dox	OK	0.822081	2.04002	1.31123	1.68965	0.0057	0.0384317	yes	1.30084
FGFR1	FGFR1	FGFR1	chr8:38268655-38326352	ctrl	dox	OK	1.81115	4.46614	1.30213	2.14953	5e-05	0.000758876	yes	1.29741
SLC25A36	SLC25A36	SLC25A36	chr3:140660661-140698785	ctrl	dox	OK	16.2263	39.8693	1.29695	3.48979	5e-05	0.000758876	yes	1.29642
MT2A	MT2A	MT2A	chr16:56642477-56643409	ctrl	dox	OK	272.077	667.367	1.29447	3.45808	5e-05	0.000758876	yes	1.29443
THBS2	THBS2	THBS2	chr6:169615874-169654209	ctrl	dox	OK	0.381586	0.949893	1.31576	1.63751	0.0049	0.0340215	yes	1.29354
JUN	JUN	JUN	chr1:59246462-59249785	ctrl	dox	OK	19.2743	47.2485	1.29359	3.49704	5e-05	0.000758876	yes	1.29315
KIAA1755	KIAA1755	KIAA1755	chr20:36838906-36917348	ctrl	dox	OK	1.79278	4.40572	1.29718	2.60686	0.0001	0.00140493	yes	1.29243
PER2	PER2	PER2	chr2:239152678-239197207	ctrl	dox	OK	0.642302	1.58053	1.29909	1.94909	0.00125	0.0116048	yes	1.2859
CYP7B1	CYP7B1	CYP7B1	chr8:65508528-65711348	ctrl	dox	OK	3.88459	9.47794	1.28681	2.23862	0.0004	0.00458914	yes	1.28462
MAPK8IP1	MAPK8IP1	MAPK8IP1	chr11:45907046-45928016	ctrl	dox	OK	5.08291	12.3879	1.28521	2.83515	5e-05	0.000758876	yes	1.28353
TRIM47	TRIM47	TRIM47	chr17:73870244-73874656	ctrl	dox	OK	18.0327	43.9002	1.28361	3.40909	5e-05	0.000758876	yes	1.28314
MARK4	MARK4	MARK4	chr19:45754515-45808541	ctrl	dox	OK	0.611319	1.50124	1.29616	1.86179	0.00275	0.0218382	yes	1.28233
RIT1	RIT1	RIT1	chr1:155867598-155881193	ctrl	dox	OK	10.4765	25.4923	1.2829	3.06917	5e-05	0.000758876	yes	1.28209
TP53INP2	TP53INP2	TP53INP2	chr20:33292147-33301237	ctrl	dox	OK	1.56134	3.80738	1.28601	2.06869	0.0006	0.00643164	yes	1.28059
FOXO3B	FOXO3B	FOXO3B	chr17:18561741-18585572	ctrl	dox	OK	0.42564	1.04718	1.29881	1.65122	0.0056	0.0378284	yes	1.27901
CELSR2	CELSR2	CELSR2	chr1:109792640-109818378	ctrl	dox	OK	2.03632	4.95389	1.2826	2.97239	5e-05	0.000758876	yes	1.27844
FAM222A	FAM222A	FAM222A	chr12:110152186-110211292	ctrl	dox	OK	2.8735	6.98314	1.28106	2.48962	0.00015	0.001995	yes	1.27812
FURIN	FURIN	FURIN	chr15:91411821-91426688	ctrl	dox	OK	15.2827	36.9346	1.27308	3.63792	5e-05	0.000758876	yes	1.27252
GALNT10	GALNT10	GALNT10	chr5:153570294-153825382	ctrl	dox	OK	5.809	14.0229	1.27143	3.17983	5e-05	0.000758876	yes	1.26997
SLCO2B1	SLCO2B1	SLCO2B1	chr11:74862031-74917445	ctrl	dox	OK	0.475226	1.15977	1.28716	1.56345	0.00785	0.049455	yes	1.2695
SLC35D1	SLC35D1	SLC35D1	chr1:67465014-67520080	ctrl	dox	OK	6.43911	15.5202	1.26922	3.13324	5e-05	0.000758876	yes	1.2679
TNFSF4	TNFSF4	TNFSF4	chr1:173152869-173176471	ctrl	dox	OK	1.36644	3.30448	1.274	1.78467	0.00405	0.0293572	yes	1.26784
TRAF4	TRAF4	TRAF4	chr17:27071022-27077976	ctrl	dox	OK	21.5411	51.786	1.26547	3.50557	5e-05	0.000758876	yes	1.26508
KIAA0513	KIAA0513	KIAA0513	chr16:85061356-85127828	ctrl	dox	OK	1.69199	4.0804	1.26999	2.53918	5e-05	0.000758876	yes	1.26502
BMF	BMF	BMF	chr15:40380090-40401085	ctrl	dox	OK	2.2871	5.50772	1.26794	2.39839	5e-05	0.000758876	yes	1.26426
TIMP3	TIMP3	TIMP3	chr22:32908539-33454377	ctrl	dox	OK	26.3631	63.2899	1.26345	3.5928	5e-05	0.000758876	yes	1.26314
TBC1D10A	TBC1D10A	TBC1D10A	chr22:30687978-30722955	ctrl	dox	OK	5.88112	14.1295	1.26455	2.59932	5e-05	0.000758876	yes	1.26312
PARP3	PARP3	PARP3	chr3:51976360-51982883	ctrl	dox	OK	5.23446	12.5565	1.26233	2.65432	5e-05	0.000758876	yes	1.26072
DYSF	DYSF	DYSF	chr2:71680752-71913893	ctrl	dox	OK	0.652102	1.57585	1.27296	1.95717	0.00085	0.00846464	yes	1.26013
ABHD2	ABHD2	ABHD2	chr15:89631380-89745591	ctrl	dox	OK	12.2966	29.4429	1.25966	3.5519	5e-05	0.000758876	yes	1.25898
NPTXR	NPTXR	NPTXR	chr22:39214455-39240017	ctrl	dox	OK	0.667387	1.61001	1.27048	1.78203	0.00385	0.0282496	yes	1.25795
PCDH1	PCDH1	PCDH1	chr5:141232675-141257975	ctrl	dox	OK	20.0869	48.037	1.25789	3.62397	5e-05	0.000758876	yes	1.25747
AMOTL2	AMOTL2	AMOTL2	chr3:134074186-134094259	ctrl	dox	OK	29.6004	70.7757	1.25764	3.55791	5e-05	0.000758876	yes	1.25735
C10orf118	C10orf118	C10orf118	chr10:115881973-115934364	ctrl	dox	OK	3.33439	7.98453	1.25978	2.79734	5e-05	0.000758876	yes	1.25727
MAGED2	MAGED2	MAGED2	chrX:54834031-54842448	ctrl	dox	OK	133.743	319.658	1.25707	3.62538	5e-05	0.000758876	yes	1.257
RNFT1	RNFT1	RNFT1	chr17:58029722-58042117	ctrl	dox	OK	10.3593	24.7632	1.25727	2.63632	5e-05	0.000758876	yes	1.25646
SLC45A3	SLC45A3	SLC45A3	chr1:205626980-205649630	ctrl	dox	OK	3.63975	8.6927	1.25596	2.48743	0.0001	0.00140493	yes	1.25367
DDR1	DDR1	DDR1	chr6_qbl_hap6:2144847-2160922	ctrl	dox	OK	26.0628	62.1462	1.25367	3.59186	5e-05	0.000758876	yes	1.25335
YPEL5	YPEL5	YPEL5	chr2:30369749-30383399	ctrl	dox	OK	23.7355	56.5797	1.25324	3.22632	5e-05	0.000758876	yes	1.25289
MTSS1L	MTSS1L	MTSS1L	chr16:70695106-70719954	ctrl	dox	OK	2.67565	6.38189	1.25409	2.54457	5e-05	0.000758876	yes	1.25097
SH3PXD2A	SH3PXD2A	SH3PXD2A	chr10:105353783-105615164	ctrl	dox	OK	3.22264	7.681	1.25305	3.08277	5e-05	0.000758876	yes	1.25046
ZNF471	ZNF471	ZNF471	chr19:57019211-57040269	ctrl	dox	OK	0.510746	1.22575	1.26299	1.60787	0.00605	0.0403221	yes	1.24674
ENOX1	ENOX1	ENOX1	chr13:43787665-44361116	ctrl	dox	OK	1.46538	3.48783	1.25105	1.842	0.00345	0.0259618	yes	1.24537
LOC100288069	LOC100288069	LOC100288069	chr1:700244-714068	ctrl	dox	OK	3.97482	9.43554	1.24722	1.90436	0.0025	0.0203111	yes	1.24512
MKNK2	MKNK2	MKNK2	chr19:2037469-2051243	ctrl	dox	OK	13.8127	32.74	1.24506	2.9512	5e-05	0.000758876	yes	1.24446
KSR1	KSR1	KSR1	chr17:25799035-25950718	ctrl	dox	OK	0.517903	1.24035	1.25999	1.61518	0.0056	0.0378284	yes	1.24399
LINC00176	LINC00176	LINC00176	chr20:62665696-62671315	ctrl	dox	OK	0.69629	1.65923	1.25276	1.73186	0.0039	0.0284884	yes	1.24085
CCDC167	CCDC167	CCDC167	chr6:37450696-37467700	ctrl	dox	OK	26.0808	61.6216	1.24045	2.64604	5e-05	0.000758876	yes	1.24013
ECM1	ECM1	ECM1	chr1:150480486-150486265	ctrl	dox	OK	5.02366	11.8694	1.24044	2.43154	0.0001	0.00140493	yes	1.23878
TMEM198	TMEM198	TMEM198	chr2:220408744-220415317	ctrl	dox	OK	2.19064	5.18292	1.24241	1.88643	0.0022	0.0182875	yes	1.23862
C17orf103	C17orf103	C17orf103	chr17:21142183-21156578	ctrl	dox	OK	0.598826	1.42661	1.25238	1.67132	0.0034	0.0257365	yes	1.23857
LRP1	LRP1	LRP1	chr12:57522281-57607125	ctrl	dox	OK	0.780738	1.8552	1.24866	2.60403	5e-05	0.000758876	yes	1.23806
NECAB3	NECAB3	NECAB3	chr20:32244892-32262264	ctrl	dox	OK	14.9478	35.22	1.23646	2.94314	5e-05	0.000758876	yes	1.23591
IL16	IL16	IL16	chr15:81489218-81616524	ctrl	dox	OK	0.598091	1.4213	1.24878	1.89884	0.0021	0.0176772	yes	1.23497
EPAS1	EPAS1	EPAS1	chr2:46524540-46613842	ctrl	dox	OK	0.662521	1.57131	1.24593	1.75268	0.00425	0.0304504	yes	1.23347
SIPA1L1	SIPA1L1	SIPA1L1	chr14:71996028-72207946	ctrl	dox	OK	4.5312	10.6644	1.23484	3.08856	5e-05	0.000758876	yes	1.23301
ANKDD1A	ANKDD1A	ANKDD1A	chr15:65204100-65251041	ctrl	dox	OK	0.683893	1.61914	1.24338	1.50295	0.0078	0.0492264	yes	1.23133
MCC	MCC	MCC	chr5:112312406-112824527	ctrl	dox	OK	26.6697	62.4457	1.2274	2.72202	5e-05	0.000758876	yes	1.22709
HSPA1A	HSPA1A	HSPA1A	chr6_qbl_hap6:3076937-3079366	ctrl	dox	OK	18.3278	42.9123	1.22736	3.197	5e-05	0.000758876	yes	1.22691
MICALL2	MICALL2	MICALL2	chr7:1473994-1499109	ctrl	dox	OK	7.02323	16.4461	1.22754	2.90548	5e-05	0.000758876	yes	1.22636
SUV420H1	SUV420H1	SUV420H1	chr11:67923506-67980784	ctrl	dox	OK	1.43138	3.35392	1.22844	1.73239	0.0047	0.0329771	yes	1.22269
ARL10	ARL10	ARL10	chr5:175792501-175800503	ctrl	dox	OK	1.40837	3.29837	1.22773	1.70424	0.00395	0.0287717	yes	1.22189
RCN3	RCN3	RCN3	chr19:50030874-50046890	ctrl	dox	OK	3.1283	7.30794	1.22408	2.08454	0.0006	0.00643164	yes	1.22145
INSIG2	INSIG2	INSIG2	chr2:118846049-118867597	ctrl	dox	OK	6.03794	14.0884	1.22238	2.31495	0.0002	0.00255224	yes	1.22102
YPEL3	YPEL3	YPEL3	chr16:30103634-30107537	ctrl	dox	OK	4.33278	10.1025	1.22135	1.76837	0.0046	0.0323894	yes	1.21945
PAEP	PAEP	PAEP	chr9:138453603-138458622	ctrl	dox	OK	6.05126	14.0925	1.21962	1.78778	0.0032	0.0245015	yes	1.21826
AXL	AXL	AXL	chr19:41725103-41767672	ctrl	dox	OK	29.8334	69.3998	1.218	3.2725	5e-05	0.000758876	yes	1.21773
ZNF433	ZNF433	ZNF433	chr19:12125531-12146525	ctrl	dox	OK	1.81382	4.22838	1.22107	1.80579	0.0025	0.0203111	yes	1.21655
TMEM86A	TMEM86A	TMEM86A	chr11:18720350-18747777	ctrl	dox	OK	1.41034	3.29073	1.22236	1.84286	0.00255	0.0206147	yes	1.21655
NLRC5	NLRC5	NLRC5	chr16:57050985-57117436	ctrl	dox	OK	0.621072	1.45636	1.22953	1.78455	0.00315	0.0242012	yes	1.21636
ZNF844	ZNF844	ZNF844	chr19:12175545-12188626	ctrl	dox	OK	2.69939	6.28334	1.2189	2.13054	0.00035	0.00411812	yes	1.21586
ANKEF1	ANKEF1	ANKEF1	chr20:10004459-10288066	ctrl	dox	OK	3.34985	7.78693	1.21696	2.32952	0.00015	0.001995	yes	1.21451
DIXDC1	DIXDC1	DIXDC1	chr11:111797867-111893374	ctrl	dox	OK	2.10049	4.8835	1.21719	2.15566	0.00055	0.00600319	yes	1.21329
GLTP	GLTP	GLTP	chr12:110288747-110318293	ctrl	dox	OK	21.3388	49.4541	1.21261	3.2211	5e-05	0.000758876	yes	1.21223
LSR	LSR	LSR	chr19:35739558-35758867	ctrl	dox	OK	6.26928	14.5068	1.21036	2.50994	5e-05	0.000758876	yes	1.20905
PLCD3	PLCD3	PLCD3	chr17:43189007-43209900	ctrl	dox	OK	4.53236	10.4862	1.21015	2.60393	5e-05	0.000758876	yes	1.20835
CTDSPL	CTDSPL	CTDSPL	chr3:37903668-38025960	ctrl	dox	OK	22.1191	51.0561	1.20679	3.42566	5e-05	0.000758876	yes	1.20642
ZNF275	ZNF275	ZNF275	chrX:152599612-152618384	ctrl	dox	OK	3.18687	7.36702	1.20894	2.62968	5e-05	0.000758876	yes	1.20638
FAM214A	FAM214A	FAM214A	chr15:52873517-52970831	ctrl	dox	OK	1.70113	3.93722	1.21068	1.94903	0.00145	0.01305	yes	1.20589
ZSCAN30	ZSCAN30	ZSCAN30	chr18:32820993-32870209	ctrl	dox	OK	1.41552	3.27825	1.2116	1.64355	0.00785	0.049455	yes	1.20583
SUV420H2	SUV420H2	SUV420H2	chr19:55851220-55859489	ctrl	dox	OK	1.69901	3.93214	1.21062	1.75259	0.00185	0.0159084	yes	1.20582
NINL	NINL	NINL	chr20:25433337-25566153	ctrl	dox	OK	1.62874	3.76128	1.20747	2.19982	0.00035	0.00411812	yes	1.20247
PNPLA2	PNPLA2	PNPLA2	chr11:818900-825571	ctrl	dox	OK	8.51495	19.6075	1.20333	2.71169	5e-05	0.000758876	yes	1.20238
SLC37A2	SLC37A2	SLC37A2	chr11:124933012-124960412	ctrl	dox	OK	4.98468	11.4723	1.20258	2.71224	5e-05	0.000758876	yes	1.20095
ACSF2	ACSF2	ACSF2	chr17:48503518-48552206	ctrl	dox	OK	7.40382	17.0296	1.2017	2.57467	5e-05	0.000758876	yes	1.2006
KDM7A	KDM7A	KDM7A	chr7:139784545-139876741	ctrl	dox	OK	1.16648	2.69055	1.20574	2.13476	0.00055	0.00600319	yes	1.19878
MC1R	MC1R	MC1R	chr16:89984286-89987385	ctrl	dox	OK	13.4266	30.8053	1.19808	3.21823	5e-05	0.000758876	yes	1.19748
DIP2C	DIP2C	DIP2C	chr10:320129-735608	ctrl	dox	OK	3.72884	8.56375	1.19952	2.91464	5e-05	0.000758876	yes	1.19734
DUSP2	DUSP2	DUSP2	chr2:96808907-96811179	ctrl	dox	OK	3.99933	9.17677	1.19823	1.97662	0.00205	0.017305	yes	1.1962
BCAR1	BCAR1	BCAR1	chr16:75262927-75301951	ctrl	dox	OK	17.5978	40.3304	1.19647	3.32374	5e-05	0.000758876	yes	1.19601
PPAPDC1B	PPAPDC1B	PPAPDC1B	chr8:38120649-38126738	ctrl	dox	OK	6.01459	13.7745	1.19546	1.70933	0.00555	0.0375897	yes	1.19411
IPO5P1	IPO5P1	IPO5P1	chr19:23437855-23457053	ctrl	dox	OK	3.53828	8.10842	1.19637	2.57361	5e-05	0.000758876	yes	1.19408
SERINC2	SERINC2	SERINC2	chr1:31882411-31907527	ctrl	dox	OK	1.53348	3.50925	1.19436	1.62705	0.00735	0.0469474	yes	1.18908
CTIF	CTIF	CTIF	chr18:46065426-46389586	ctrl	dox	OK	2.52026	5.75785	1.19195	2.52824	5e-05	0.000758876	yes	1.18875
LOC442028	LOC442028	LOC442028	chr2:95534429-95613087	ctrl	dox	OK	2.30416	5.25142	1.18847	1.96835	0.0008	0.00807874	yes	1.18496
BACE1	BACE1	BACE1	chr11:117103340-117186972	ctrl	dox	OK	2.65215	6.02079	1.18279	2.17865	0.0003	0.00361996	yes	1.17976
JUNB	JUNB	JUNB	chr19:12902309-12904125	ctrl	dox	OK	19.8957	45.0474	1.17899	2.98082	5e-05	0.000758876	yes	1.17858
KRBA1	KRBA1	KRBA1	chr7:149412101-149431664	ctrl	dox	OK	1.93157	4.37982	1.1811	2.15025	0.0002	0.00255224	yes	1.17694
ZNF267	ZNF267	ZNF267	chr16:31885078-31928629	ctrl	dox	OK	10.0154	22.652	1.17742	2.91011	5e-05	0.000758876	yes	1.17662
ST5	ST5	ST5	chr11:8714898-8932498	ctrl	dox	OK	3.28288	7.42533	1.1775	2.26244	0.0001	0.00140493	yes	1.17505
FAXDC2	FAXDC2	FAXDC2	chr5:154198051-154230213	ctrl	dox	OK	2.93606	6.64146	1.17762	2.09759	0.0003	0.00361996	yes	1.17488
SPARC	SPARC	SPARC	chr5:151040656-151067468	ctrl	dox	OK	440.586	993.962	1.17377	2.7695	5e-05	0.000758876	yes	1.17375
CHAC1	CHAC1	CHAC1	chr15:41245635-41248717	ctrl	dox	OK	1.94802	4.40088	1.17579	1.58996	0.0073	0.0466945	yes	1.17167
DUSP1	DUSP1	DUSP1	chr5:172195092-172198203	ctrl	dox	OK	11.0862	24.9662	1.17121	2.66677	5e-05	0.000758876	yes	1.17049
NANOS1	NANOS1	NANOS1	chr10:120789227-120793854	ctrl	dox	OK	5.4454	12.2564	1.17043	2.62625	5e-05	0.000758876	yes	1.16896
PDGFA	PDGFA	PDGFA	chr7:536896-559481	ctrl	dox	OK	1.58984	3.58188	1.17184	1.61179	0.00725	0.046474	yes	1.16681
PWAR5	PWAR5	PWAR5	chr15:25230006-25233379	ctrl	dox	OK	2.19051	4.92943	1.17015	1.76043	0.004	0.0290534	yes	1.16651
P4HTM	P4HTM	P4HTM	chr3:49027340-49044581	ctrl	dox	OK	2.17538	4.88838	1.16809	1.72837	0.00685	0.0443373	yes	1.16442
SEC24D	SEC24D	SEC24D	chr4:119643977-119757326	ctrl	dox	OK	5.389	12.0732	1.16372	2.60969	5e-05	0.000758876	yes	1.16224
TLE3	TLE3	TLE3	chr15:70340129-70390256	ctrl	dox	OK	6.33046	14.148	1.16021	2.90115	5e-05	0.000758876	yes	1.15896
CD74	CD74	CD74	chr5:149781199-149792499	ctrl	dox	OK	78.071	174.337	1.15902	3.22887	5e-05	0.000758876	yes	1.15892
PHYHIP	PHYHIP	PHYHIP	chr8:22077215-22089851	ctrl	dox	OK	1.71826	3.84547	1.16221	1.88862	0.00215	0.0179634	yes	1.15759
APOL1	APOL1	APOL1	chr22:36649116-36663577	ctrl	dox	OK	4.69428	10.484	1.15922	2.39886	5e-05	0.000758876	yes	1.15752
B4GALT4	B4GALT4	B4GALT4	chr3:118930588-118959752	ctrl	dox	OK	21.526	47.994	1.15678	3.04649	5e-05	0.000758876	yes	1.1564
SCN5A	SCN5A	SCN5A	chr3:38589552-38691164	ctrl	dox	OK	0.52858	1.18992	1.17067	1.71646	0.0036	0.0267874	yes	1.15571
TEAD3	TEAD3	TEAD3	chr6:35441373-35464861	ctrl	dox	OK	1.82089	4.06907	1.16005	1.86579	0.00205	0.017305	yes	1.1557
SMOX	SMOX	SMOX	chr20:4129425-4168394	ctrl	dox	OK	4.4218	9.84788	1.15518	2.19084	0.0006	0.00643164	yes	1.15338
DUSP5	DUSP5	DUSP5	chr10:112257624-112271302	ctrl	dox	OK	19.1492	42.5099	1.15052	2.91186	5e-05	0.000758876	yes	1.1501
RARG	RARG	RARG	chr12:53604349-53626040	ctrl	dox	OK	3.63468	8.07847	1.15225	2.20265	0.00045	0.00505616	yes	1.15007
ELTD1	ELTD1	ELTD1	chr1:79355448-79472495	ctrl	dox	OK	1.58885	3.53762	1.1548	1.65066	0.00735	0.0469474	yes	1.14982
GDF11	GDF11	GDF11	chr12:56137063-56211540	ctrl	dox	OK	3.18732	7.05115	1.14551	1.67846	0.00545	0.0371084	yes	1.14304
TUBB2A	TUBB2A	TUBB2A	chr6:3153901-3157783	ctrl	dox	OK	37.8156	83.4072	1.14119	3.21759	5e-05	0.000758876	yes	1.14098
PPP2R5B	PPP2R5B	PPP2R5B	chr11:64692142-64703360	ctrl	dox	OK	1.78872	3.95286	1.14397	1.73313	0.00355	0.0265474	yes	1.13957
LTBP2	LTBP2	LTBP2	chr14:74964885-75079034	ctrl	dox	OK	1.09849	2.42935	1.14505	2.13166	0.0005	0.00552122	yes	1.1379
PLAU	PLAU	PLAU	chr10:75669726-75682535	ctrl	dox	OK	5.62419	12.3678	1.13687	2.05044	0.0008	0.00807874	yes	1.13547
MSRB1	MSRB1	MSRB1	chr16:1988233-1993294	ctrl	dox	OK	8.63965	18.9825	1.13562	2.18863	0.0003	0.00361996	yes	1.13472
KIAA1161	KIAA1161	KIAA1161	chr9:34366663-34376894	ctrl	dox	OK	3.42012	7.51743	1.13619	2.58063	5e-05	0.000758876	yes	1.1339
PLEK2	PLEK2	PLEK2	chr14:67853699-67878828	ctrl	dox	OK	14.2323	31.1505	1.13008	2.54203	5e-05	0.000758876	yes	1.12954
CREB3L2	CREB3L2	CREB3L2	chr7:137559724-137686847	ctrl	dox	OK	12.6086	27.5406	1.12715	2.34447	0.00035	0.00411812	yes	1.12653
KLHL21	KLHL21	KLHL21	chr1:6650783-6662929	ctrl	dox	OK	64.8025	141.439	1.12606	3.3249	5e-05	0.000758876	yes	1.12594
RBM20	RBM20	RBM20	chr10:112404154-112599229	ctrl	dox	OK	0.702917	1.54426	1.13549	1.81005	0.00275	0.0218382	yes	1.12442
POFUT2	POFUT2	POFUT2	chr21:46683842-46707811	ctrl	dox	OK	9.84367	21.4573	1.1242	2.7151	5e-05	0.000758876	yes	1.12341
QPRT	QPRT	QPRT	chr16:29690440-29709314	ctrl	dox	OK	3.10862	6.78281	1.12561	1.70628	0.00595	0.0397441	yes	1.1231
ARHGEF19	ARHGEF19	ARHGEF19	chr1:16524598-16539104	ctrl	dox	OK	2.63281	5.74246	1.12506	2.02416	0.0007	0.00729454	yes	1.12211
KIFC2	KIFC2	KIFC2	chr8:145691737-145701718	ctrl	dox	OK	3.73741	8.14615	1.12408	2.16894	0.00015	0.001995	yes	1.12199
ZNF799	ZNF799	ZNF799	chr19:12500827-12512088	ctrl	dox	OK	2.1125	4.57591	1.11511	1.73334	0.00235	0.019302	yes	1.11144
FRMD8	FRMD8	FRMD8	chr11:65154040-65180995	ctrl	dox	OK	9.39489	20.2972	1.11133	2.70813	5e-05	0.000758876	yes	1.11051
B3GNTL1	B3GNTL1	B3GNTL1	chr17:80901666-81009686	ctrl	dox	OK	7.59253	16.3891	1.11009	2.14298	0.00085	0.00846464	yes	1.10907
HSPA1B	HSPA1B	HSPA1B	chr6_qbl_hap6:3089162-3091686	ctrl	dox	OK	23.9277	51.6214	1.10928	2.98046	5e-05	0.000758876	yes	1.10896
AIM1	AIM1	AIM1	chr6:106959729-107018334	ctrl	dox	OK	6.69587	14.4426	1.10898	2.93764	5e-05	0.000758876	yes	1.10783
SLC2A6	SLC2A6	SLC2A6	chr9:136336215-136344276	ctrl	dox	OK	1.967	4.25038	1.1116	1.7147	0.0045	0.0318226	yes	1.10767
SUFU	SUFU	SUFU	chr10:104263718-104393214	ctrl	dox	OK	3.42837	7.39853	1.10972	1.92893	0.0015	0.0134059	yes	1.10746
RAB17	RAB17	RAB17	chr2:238482964-238499769	ctrl	dox	OK	13.7616	29.6473	1.10725	2.41147	5e-05	0.000758876	yes	1.10669
UBR1	UBR1	UBR1	chr15:43235097-43398286	ctrl	dox	OK	12.3107	26.5065	1.10644	3.14164	5e-05	0.000758876	yes	1.10581
HSPG2	HSPG2	HSPG2	chr1:22138757-22263790	ctrl	dox	OK	7.66181	16.4934	1.10613	3.20799	5e-05	0.000758876	yes	1.10512
TULP3	TULP3	TULP3	chr12:3000032-3050306	ctrl	dox	OK	6.38828	13.7528	1.10622	2.45784	5e-05	0.000758876	yes	1.10502
CXXC5	CXXC5	CXXC5	chr5:139028300-139062680	ctrl	dox	OK	12.9069	27.7706	1.10542	2.50697	5e-05	0.000758876	yes	1.10482
IER5L	IER5L	IER5L	chr9:131937830-131940540	ctrl	dox	OK	7.40593	15.939	1.1058	2.4686	5e-05	0.000758876	yes	1.10477
ABCA7	ABCA7	ABCA7	chr19:1040101-1065570	ctrl	dox	OK	0.651125	1.41182	1.11655	1.69741	0.0055	0.0373638	yes	1.10474
ERBB2	ERBB2	ERBB2	chr17:37844336-37884915	ctrl	dox	OK	4.17843	8.99576	1.10628	2.42029	5e-05	0.000758876	yes	1.10444
ARRDC4	ARRDC4	ARRDC4	chr15:98503932-98517068	ctrl	dox	OK	3.01042	6.48023	1.10608	2.05105	0.0009	0.00885452	yes	1.10352
MB21D2	MB21D2	MB21D2	chr3:192514604-192635950	ctrl	dox	OK	4.15657	8.93908	1.10473	2.16317	0.0004	0.00458914	yes	1.10288
WFS1	WFS1	WFS1	chr4:6271576-6304992	ctrl	dox	OK	5.65433	12.1059	1.09828	2.5456	5e-05	0.000758876	yes	1.09692
KCNC4	KCNC4	KCNC4	chr1:110753335-110776674	ctrl	dox	OK	2.33472	5.00228	1.09934	2.01577	0.0012	0.0112102	yes	1.09605
HRH1	HRH1	HRH1	chr3:11178778-11304939	ctrl	dox	OK	5.72521	12.2279	1.09478	2.48444	5e-05	0.000758876	yes	1.09344
PLEKHO2	PLEKHO2	PLEKHO2	chr15:65134081-65160201	ctrl	dox	OK	20.0995	42.7834	1.08989	3.08562	5e-05	0.000758876	yes	1.08951
TANC2	TANC2	TANC2	chr17:60778674-61505067	ctrl	dox	OK	0.72824	1.55999	1.09905	1.90977	0.0015	0.0134059	yes	1.08859
NR4A3	NR4A3	NR4A3	chr9:102584136-102629173	ctrl	dox	OK	1.28226	2.73791	1.09438	1.73831	0.004	0.0290534	yes	1.08844
GLUL	GLUL	GLUL	chr1:182350838-182361341	ctrl	dox	OK	41.2572	87.5548	1.08554	3.20011	5e-05	0.000758876	yes	1.08536
GPT2	GPT2	GPT2	chr16:46918307-46965201	ctrl	dox	OK	9.00174	19.1118	1.08619	2.7406	5e-05	0.000758876	yes	1.08534
GABPB1	GABPB1	GABPB1	chr15:50569388-50650503	ctrl	dox	OK	16.0569	34.0597	1.08487	2.02312	0.0018	0.0155529	yes	1.0844
PSD4	PSD4	PSD4	chr2:113931559-113960677	ctrl	dox	OK	1.24937	2.65927	1.08983	1.66225	0.0045	0.0318226	yes	1.08374
TNK2	TNK2	TNK2	chr3:195590235-195635880	ctrl	dox	OK	5.9243	12.5509	1.08307	2.71772	5e-05	0.000758876	yes	1.08179
AES	AES	AES	chr19:3052907-3062964	ctrl	dox	OK	18.6806	39.5469	1.08202	2.71464	5e-05	0.000758876	yes	1.08162
ECE1	ECE1	ECE1	chr1:21543739-21672034	ctrl	dox	OK	11.0686	23.4348	1.08218	2.98775	5e-05	0.000758876	yes	1.08149
MOB3C	MOB3C	MOB3C	chr1:47073386-47082563	ctrl	dox	OK	3.18395	6.74786	1.08361	1.98668	0.0009	0.00885452	yes	1.08122
LRIF1	LRIF1	LRIF1	chr1:111489811-111506566	ctrl	dox	OK	28.2307	59.7389	1.08141	2.77904	5e-05	0.000758876	yes	1.08114
DTX3	DTX3	DTX3	chr12:57998404-58003587	ctrl	dox	OK	3.25238	6.88013	1.08094	1.87395	0.00245	0.0199772	yes	1.07861
SLC2A4RG	SLC2A4RG	SLC2A4RG	chr20:62371210-62436856	ctrl	dox	OK	5.63947	11.8942	1.07663	1.98761	0.001	0.00966882	yes	1.07528
ZMIZ1	ZMIZ1	ZMIZ1	chr10:80828791-81076285	ctrl	dox	OK	2.09229	4.41596	1.07765	2.32804	0.00015	0.001995	yes	1.07403
KCNQ1OT1	KCNQ1OT1	KCNQ1OT1	chr11:2466220-2870340	ctrl	dox	OK	0.37832	0.807113	1.09316	2.7134	5e-05	0.000758876	yes	1.07329
CSF1	CSF1	CSF1	chr1:110453232-110473616	ctrl	dox	OK	1.73286	3.65674	1.0774	1.75929	0.00305	0.0236148	yes	1.07304
LINC01347	LINC01347	LINC01347	chr1:243219615-243265046	ctrl	dox	OK	1.33464	2.81693	1.07767	1.61891	0.0072	0.046203	yes	1.07202
ZNF44	ZNF44	ZNF44	chr19:12382624-12405714	ctrl	dox	OK	1.84652	3.88914	1.07464	1.62035	0.00645	0.0422355	yes	1.07056
KIAA1841	KIAA1841	KIAA1841	chr2:61293005-61365169	ctrl	dox	OK	1.45693	3.06987	1.07524	1.63025	0.00635	0.0417482	yes	1.07007
MYADM	MYADM	MYADM	chr19:54368837-54379689	ctrl	dox	OK	2.10157	4.42167	1.07313	1.5121	0.00705	0.0453702	yes	1.06953
CALCOCO1	CALCOCO1	CALCOCO1	chr12:54104901-54121307	ctrl	dox	OK	4.5913	9.64686	1.07116	2.24831	0.0002	0.00255224	yes	1.06951
STAT5A	STAT5A	STAT5A	chr17:40439564-40463960	ctrl	dox	OK	2.13206	4.46501	1.06642	1.99792	0.0009	0.00885452	yes	1.06289
MAPK8IP3	MAPK8IP3	MAPK8IP3	chr16:1756220-1820318	ctrl	dox	OK	2.64342	5.52682	1.06404	2.20981	0.00035	0.00411812	yes	1.0612
ACADVL	ACADVL	ACADVL	chr17:7093209-7128586	ctrl	dox	OK	35.8686	74.6066	1.05658	2.68923	5e-05	0.000758876	yes	1.05637
RNF19A	RNF19A	RNF19A	chr8:101269286-101348446	ctrl	dox	OK	15.9738	33.2005	1.0555	2.8519	5e-05	0.000758876	yes	1.05503
ARID3B	ARID3B	ARID3B	chr15:74833547-74890472	ctrl	dox	OK	1.63195	3.40121	1.05945	1.80034	0.00365	0.0270697	yes	1.05487
MVP	MVP	MVP	chr16:29827527-29859360	ctrl	dox	OK	15.2991	31.7944	1.05533	2.0749	0.00065	0.00685708	yes	1.05484
MPP2	MPP2	MPP2	chr17:41952726-41987079	ctrl	dox	OK	1.94155	4.04384	1.05852	1.85839	0.0019	0.0162527	yes	1.05467
PBXIP1	PBXIP1	PBXIP1	chr1:154916558-154928567	ctrl	dox	OK	8.73373	18.1493	1.05524	2.57496	5e-05	0.000758876	yes	1.05439
FADS3	FADS3	FADS3	chr11:61640994-61659017	ctrl	dox	OK	6.91568	14.3438	1.05249	1.96828	0.00095	0.00928033	yes	1.05141
GTPBP2	GTPBP2	GTPBP2	chr6:43543877-43596983	ctrl	dox	OK	20.822	43.1418	1.05098	2.35074	0.0001	0.00140493	yes	1.05062
TNFRSF1A	TNFRSF1A	TNFRSF1A	chr12:6437922-6451283	ctrl	dox	OK	21.9245	45.1323	1.04161	2.7189	5e-05	0.000758876	yes	1.04128
ZDHHC23	ZDHHC23	ZDHHC23	chr3:113666747-113681827	ctrl	dox	OK	5.39814	11.1177	1.04233	2.21377	0.0002	0.00255224	yes	1.04095
CTSZ	CTSZ	CTSZ	chr20:57570241-57582309	ctrl	dox	OK	36.0549	74.0237	1.03779	2.83371	5e-05	0.000758876	yes	1.03759
RASSF5	RASSF5	RASSF5	chr1:206680862-206762616	ctrl	dox	OK	1.98241	4.0745	1.03937	1.73535	0.004	0.0290534	yes	1.03564
CCNG2	CCNG2	CCNG2	chr4:78078356-78091213	ctrl	dox	OK	2.33568	4.79016	1.03623	1.84634	0.0008	0.00807874	yes	1.03308
VGLL4	VGLL4	VGLL4	chr3:11314009-11762242	ctrl	dox	OK	22.8576	46.6785	1.03009	2.49658	5e-05	0.000758876	yes	1.02976
HECTD2	HECTD2	HECTD2	chr10:93066718-93371217	ctrl	dox	OK	3.52805	7.20756	1.03064	1.68859	0.0054	0.0368658	yes	1.02856
RGL2	RGL2	RGL2	chr6_qbl_hap6:4491673-4499405	ctrl	dox	OK	15.9152	32.4723	1.0288	2.77309	5e-05	0.000758876	yes	1.02834
DAB2IP	DAB2IP	DAB2IP	chr9:124329380-124547809	ctrl	dox	OK	4.18392	8.53946	1.02929	2.37013	0.0001	0.00140493	yes	1.02753
CHKA	CHKA	CHKA	chr11:67820325-67888858	ctrl	dox	OK	8.17986	16.6853	1.02843	2.24959	0.0002	0.00255224	yes	1.02753
GPCPD1	GPCPD1	GPCPD1	chr20:5525079-5591672	ctrl	dox	OK	2.94915	6.01093	1.02729	2.02048	0.00065	0.00685708	yes	1.0248
BBC3	BBC3	BBC3	chr19:47724078-47736023	ctrl	dox	OK	3.00279	6.11663	1.02643	1.6214	0.00695	0.0448552	yes	1.02399
KIAA0232	KIAA0232	KIAA0232	chr4:6784458-6885899	ctrl	dox	OK	8.88817	18.0798	1.02442	2.81308	5e-05	0.000758876	yes	1.0236
STX5	STX5	STX5	chr11:62574331-62599563	ctrl	dox	OK	7.76013	15.7621	1.0223	2.07438	0.0003	0.00361996	yes	1.02136
KDM5B	KDM5B	KDM5B	chr1:202696531-202777549	ctrl	dox	OK	10.6491	21.6204	1.02166	2.81745	5e-05	0.000758876	yes	1.02097
ERVK13-1	ERVK13-1	ERVK13-1	chr16:2708389-2723440	ctrl	dox	OK	0.864495	1.7645	1.02933	1.63964	0.0067	0.0435549	yes	1.02089
RGS3	RGS3	RGS3	chr9:116207008-116360023	ctrl	dox	OK	12.0087	24.3708	1.02108	2.2721	5e-05	0.000758876	yes	1.02046
ZNF77	ZNF77	ZNF77	chr19:2933215-2944969	ctrl	dox	OK	2.87145	5.82488	1.02045	1.6167	0.00555	0.0375897	yes	1.01791
XBP1	XBP1	XBP1	chr22:29190547-29196560	ctrl	dox	OK	22.9078	46.3738	1.01747	2.59832	5e-05	0.000758876	yes	1.01715
SUOX	SUOX	SUOX	chr12:56391042-56399309	ctrl	dox	OK	4.83721	9.7982	1.01834	1.9434	0.00125	0.0116048	yes	1.01683
SPHK1	SPHK1	SPHK1	chr17:74380689-74383941	ctrl	dox	OK	54.4981	110.272	1.01679	2.92652	5e-05	0.000758876	yes	1.01665
FAM210B	FAM210B	FAM210B	chr20:54933982-54943718	ctrl	dox	OK	44.809	90.6217	1.01607	2.93686	5e-05	0.000758876	yes	1.01591
NT5E	NT5E	NT5E	chr6:86159301-86205509	ctrl	dox	OK	70.042	141.264	1.0121	2.95581	5e-05	0.000758876	yes	1.012
PLEKHF1	PLEKHF1	PLEKHF1	chr19:30156326-30166383	ctrl	dox	OK	8.22548	16.5386	1.00767	2.06648	0.00025	0.00312152	yes	1.00678
PPM1M	PPM1M	PPM1M	chr3:52279808-52284615	ctrl	dox	OK	2.51512	5.06316	1.00941	1.58632	0.0076	0.0483379	yes	1.00653
CRIP2	CRIP2	CRIP2	chr14:105939274-105946507	ctrl	dox	OK	42.3627	85.1119	1.00657	2.69042	5e-05	0.000758876	yes	1.0064
ZNF583	ZNF583	ZNF583	chr19:56915382-56936400	ctrl	dox	OK	3.41016	6.85503	1.00733	1.74084	0.0038	0.0279512	yes	1.0052
FAM214B	FAM214B	FAM214B	chr9:35104117-35115893	ctrl	dox	OK	10.276	20.6103	1.00409	2.47539	5e-05	0.000758876	yes	1.00338
ZBTB43	ZBTB43	ZBTB43	chr9:129567284-129600487	ctrl	dox	OK	5.5523	11.1404	1.00464	2.4029	5e-05	0.000758876	yes	1.00334
SHB	SHB	SHB	chr9:37915894-38069210	ctrl	dox	OK	4.27507	8.57962	1.00497	2.4175	5e-05	0.000758876	yes	1.00328
IRF1	IRF1	IRF1	chr5:131817300-131826465	ctrl	dox	OK	3.8114	7.6341	1.00214	2.01651	0.0006	0.00643164	yes	1.00025
TWSG1	TWSG1	TWSG1	chr18:9334764-9402418	ctrl	dox	OK	22.0106	44.0339	1.00042	2.71962	5e-05	0.000758876	yes	1.00009
UBE2E1	UBE2E1	UBE2E1	chr3:23847383-23933131	ctrl	dox	OK	84.6789	42.3309	-1.00029	-2.54868	5e-05	0.000758876	yes	-1.00012
LGALS3	LGALS3	LGALS3	chr14:55595934-55612148	ctrl	dox	OK	206.989	103.415	-1.00111	-2.85154	5e-05	0.000758876	yes	-1.00104
C5orf30	C5orf30	C5orf30	chr5:102594441-102614361	ctrl	dox	OK	28.1456	14.0543	-1.0019	-2.45128	5e-05	0.000758876	yes	-1.00138
THAP11	THAP11	THAP11	chr16:67862059-67905219	ctrl	dox	OK	49.6134	24.7278	-1.00459	-1.69848	0.0059	0.0394836	yes	-1.0043
TGFBR3	TGFBR3	TGFBR3	chr1:92145899-92371559	ctrl	dox	OK	2.93385	1.45746	-1.00934	-1.74699	0.0033	0.0251279	yes	-1.00438
TOP1MT	TOP1MT	TOP1MT	chr8:144391496-144442147	ctrl	dox	OK	10.5567	5.25309	-1.00692	-2.01488	0.00025	0.00312152	yes	-1.00554
SLC19A2	SLC19A2	SLC19A2	chr1:169433148-169455208	ctrl	dox	OK	24.764	12.299	-1.00971	-2.46008	0.0001	0.00140493	yes	-1.00911
TBC1D4	TBC1D4	TBC1D4	chr13:75858799-76056250	ctrl	dox	OK	6.76533	3.35282	-1.01279	-2.21877	5e-05	0.000758876	yes	-1.01062
LZTS1	LZTS1	LZTS1	chr8:20103675-20112803	ctrl	dox	OK	6.58848	3.26215	-1.01412	-2.22484	0.00035	0.00411812	yes	-1.01189
TRIM16L	TRIM16L	TRIM16L	chr17:18625401-18639431	ctrl	dox	OK	7.35166	3.63385	-1.01657	-1.67327	0.005	0.0345954	yes	-1.01457
LIPA	LIPA	LIPA	chr10:90973325-91011796	ctrl	dox	OK	38.9873	19.283	-1.01567	-2.46767	5e-05	0.000758876	yes	-1.0153
RASAL2	RASAL2	RASAL2	chr1:178060642-178448648	ctrl	dox	OK	7.26099	3.58388	-1.01864	-2.49731	5e-05	0.000758876	yes	-1.01661
PTPRM	PTPRM	PTPRM	chr18:7567313-8406859	ctrl	dox	OK	9.9413	4.89871	-1.02103	-2.45745	5e-05	0.000758876	yes	-1.01954
ATP10B	ATP10B	ATP10B	chr5:159990126-160279219	ctrl	dox	OK	2.55818	1.25542	-1.02695	-1.84168	0.00225	0.0185998	yes	-1.02113
NEDD4L	NEDD4L	NEDD4L	chr18:55711609-56068772	ctrl	dox	OK	18.2005	8.95724	-1.02285	-2.80925	5e-05	0.000758876	yes	-1.02203
NQO1	NQO1	NQO1	chr16:69743303-69760571	ctrl	dox	OK	192.86	94.8814	-1.02336	-2.69113	5e-05	0.000758876	yes	-1.02328
LINC00152	LINC00152	LINC00152	chr2:87754973-87821030	ctrl	dox	OK	115.979	57.0266	-1.02416	-2.31876	0.0002	0.00255224	yes	-1.02403
ABCC2	ABCC2	ABCC2	chr10:101542354-101611949	ctrl	dox	OK	4.21043	2.06284	-1.02933	-1.91267	0.0016	0.0141308	yes	-1.02578
GMPR	GMPR	GMPR	chr6:16238810-16295780	ctrl	dox	OK	17.4879	8.58255	-1.02688	-2.0609	0.0004	0.00458914	yes	-1.02602
ELK3	ELK3	ELK3	chr12:96588206-96661606	ctrl	dox	OK	10.8429	5.31764	-1.02789	-1.92957	0.0011	0.0104944	yes	-1.02651
CCDC115	CCDC115	CCDC115	chr2:131095505-131100254	ctrl	dox	OK	7.71953	3.78415	-1.02855	-1.69229	0.0053	0.0363351	yes	-1.0266
ANK2	ANK2	ANK2	chr4:113739238-114304896	ctrl	dox	OK	4.90729	2.39496	-1.03493	-2.19338	0.00015	0.001995	yes	-1.03185
TMEM109	TMEM109	TMEM109	chr11:60681370-60690915	ctrl	dox	OK	21.7619	10.6189	-1.03517	-2.34739	0.0001	0.00140493	yes	-1.03448
AKAP1	AKAP1	AKAP1	chr17:55162552-55198710	ctrl	dox	OK	13.2708	6.47119	-1.03615	-2.49255	5e-05	0.000758876	yes	-1.03501
ASAH1	ASAH1	ASAH1	chr8:17913924-17942507	ctrl	dox	OK	113.285	55.2621	-1.0356	-2.74201	5e-05	0.000758876	yes	-1.03546
GPD1L	GPD1L	GPD1L	chr3:32148002-32210207	ctrl	dox	OK	18.1272	8.8324	-1.03728	-2.51587	0.0001	0.00140493	yes	-1.03644
EMR1	EMR1	EMR1	chr19:6887559-6940464	ctrl	dox	OK	11.58	5.63563	-1.03899	-2.00285	0.0006	0.00643164	yes	-1.03767
RSU1	RSU1	RSU1	chr10:16632616-16859453	ctrl	dox	OK	16.523	8.03121	-1.04078	-2.44946	5e-05	0.000758876	yes	-1.03986
MTFP1	MTFP1	MTFP1	chr22:30821610-30825041	ctrl	dox	OK	22.8953	11.125	-1.04125	-2.14685	0.0006	0.00643164	yes	-1.04058
WIBG	WIBG	WIBG	chr12:56295196-56321697	ctrl	dox	OK	12.1402	5.88046	-1.04579	-1.74621	0.0045	0.0318226	yes	-1.04453
PIK3R3	PIK3R3	PIK3R3	chr1:46505811-46598708	ctrl	dox	OK	30.6898	14.868	-1.04555	-2.85797	5e-05	0.000758876	yes	-1.04505
LGR4	LGR4	LGR4	chr11:27387507-27494334	ctrl	dox	OK	6.66001	3.22166	-1.04772	-2.03281	0.0007	0.00729454	yes	-1.04541
MYO1E	MYO1E	MYO1E	chr15:59428167-59665071	ctrl	dox	OK	16.1823	7.82653	-1.04798	-2.6934	5e-05	0.000758876	yes	-1.04702
ETHE1	ETHE1	ETHE1	chr19:44010870-44031396	ctrl	dox	OK	28.3485	13.7064	-1.04842	-2.07801	0.00075	0.007695	yes	-1.04788
EEA1	EEA1	EEA1	chr12:93166284-93323107	ctrl	dox	OK	14.5241	7.0139	-1.05016	-2.78238	5e-05	0.000758876	yes	-1.0491
BMX	BMX	BMX	chrX:15518899-15574652	ctrl	dox	OK	28.4436	13.7398	-1.04974	-2.52335	5e-05	0.000758876	yes	-1.0492
DCTPP1	DCTPP1	DCTPP1	chr16:30435018-30441373	ctrl	dox	OK	49.5171	23.9205	-1.04968	-2.46694	5e-05	0.000758876	yes	-1.04937
BOP1	BOP1	BOP1	chr8:145486055-145515120	ctrl	dox	OK	39.29	18.9618	-1.05107	-2.79328	5e-05	0.000758876	yes	-1.05067
PRMT3	PRMT3	PRMT3	chr11:20409075-20530879	ctrl	dox	OK	22.3357	10.7575	-1.05401	-2.42761	5e-05	0.000758876	yes	-1.05331
FOXD3	FOXD3	FOXD3	chr1:63788729-63790797	ctrl	dox	OK	7.65056	3.66544	-1.06158	-1.86406	0.0013	0.0119639	yes	-1.05953
BCAT1	BCAT1	BCAT1	chr12:24962957-25102393	ctrl	dox	OK	6.92027	3.31231	-1.06299	-2.11199	0.0009	0.00885452	yes	-1.06072
SIGMAR1	SIGMAR1	SIGMAR1	chr9:34634718-34637823	ctrl	dox	OK	63.1867	30.2654	-1.06195	-2.88068	5e-05	0.000758876	yes	-1.0617
HPS4	HPS4	HPS4	chr22:26846848-26879829	ctrl	dox	OK	26.4725	12.6581	-1.06443	-2.89791	5e-05	0.000758876	yes	-1.06384
IFI44	IFI44	IFI44	chr1:79115476-79129763	ctrl	dox	OK	17.1279	8.18737	-1.06487	-2.0352	0.0007	0.00729454	yes	-1.06396
ACP6	ACP6	ACP6	chr1:147119167-147142634	ctrl	dox	OK	7.95344	3.79657	-1.06688	-1.79542	0.00215	0.0179634	yes	-1.0649
LRIG3	LRIG3	LRIG3	chr12:59265936-59314319	ctrl	dox	OK	3.08233	1.46397	-1.07414	-1.70578	0.0038	0.0279512	yes	-1.06899
ZCCHC9	ZCCHC9	ZCCHC9	chr5:80243511-81047072	ctrl	dox	OK	47.6346	22.6997	-1.06933	-2.21499	0.00015	0.001995	yes	-1.069
KATNB1	KATNB1	KATNB1	chr16:57769659-57791162	ctrl	dox	OK	19.1809	9.12954	-1.07106	-2.64778	5e-05	0.000758876	yes	-1.07023
DMD	DMD	DMD	chrX:31137344-33357726	ctrl	dox	OK	3.38659	1.60752	-1.07499	-1.612	0.00495	0.0343023	yes	-1.0703
PIM1	PIM1	PIM1	chr6:37137921-37143204	ctrl	dox	OK	6.08192	2.89053	-1.07319	-1.81285	0.00335	0.0254331	yes	-1.07058
PDLIM5	PDLIM5	PDLIM5	chr4:95373007-95589378	ctrl	dox	OK	17.9038	8.51923	-1.07147	-1.82921	0.00215	0.0179634	yes	-1.07058
GK	GK	GK	chrX:30671475-30749577	ctrl	dox	OK	9.84126	4.6799	-1.07237	-2.24603	0.0004	0.00458914	yes	-1.07075
BFSP1	BFSP1	BFSP1	chr20:17474549-17549865	ctrl	dox	OK	6.76783	3.20906	-1.07654	-1.78988	0.0042	0.0302006	yes	-1.07418
SCFD2	SCFD2	SCFD2	chr4:53739150-54232242	ctrl	dox	OK	11.1261	5.27311	-1.07723	-2.27087	0.0002	0.00255224	yes	-1.07578
KCNQ5	KCNQ5	KCNQ5	chr6:73331570-73908573	ctrl	dox	OK	2.15453	1.01491	-1.08603	-1.73716	0.00365	0.0270697	yes	-1.07856
CADM1	CADM1	CADM1	chr11:115044344-115375241	ctrl	dox	OK	72.8053	34.4482	-1.07962	-3.04082	5e-05	0.000758876	yes	-1.07939
CDH13	CDH13	CDH13	chr16:82660398-83830215	ctrl	dox	OK	11.3656	5.37233	-1.08105	-1.5055	0.00785	0.049455	yes	-1.07964
TIAM1	TIAM1	TIAM1	chr21:32490735-32931290	ctrl	dox	OK	3.49295	1.64566	-1.08579	-1.87851	0.0018	0.0155529	yes	-1.08116
SLC19A1	SLC19A1	SLC19A1	chr21:46934628-46962385	ctrl	dox	OK	8.96014	4.22528	-1.08448	-2.08626	0.0003	0.00361996	yes	-1.08267
POPDC3	POPDC3	POPDC3	chr6:105585561-105627858	ctrl	dox	OK	24.3835	11.4863	-1.08598	-2.2247	0.0003	0.00361996	yes	-1.08533
CDCA7L	CDCA7L	CDCA7L	chr7:21582832-21985542	ctrl	dox	OK	15.2266	7.17054	-1.08644	-2.35003	0.00015	0.001995	yes	-1.08538
CIT	CIT	CIT	chr12:120123594-120315095	ctrl	dox	OK	8.21105	3.8605	-1.08878	-2.78191	5e-05	0.000758876	yes	-1.0868
PITPNC1	PITPNC1	PITPNC1	chr17:65373396-65693379	ctrl	dox	OK	2.89321	1.35618	-1.09312	-1.84078	0.0028	0.0221471	yes	-1.0875
LDHA	LDHA	LDHA	chr11:18415935-18429765	ctrl	dox	OK	448.851	210.95	-1.08933	-3.10225	5e-05	0.000758876	yes	-1.0893
DAAM1	DAAM1	DAAM1	chr14:59655380-59838123	ctrl	dox	OK	7.87293	3.69424	-1.09162	-2.36504	0.0001	0.00140493	yes	-1.08955
NHSL1	NHSL1	NHSL1	chr6:138743180-138893668	ctrl	dox	OK	4.46894	2.09468	-1.0932	-2.28083	0.0001	0.00140493	yes	-1.08956
ELF1	ELF1	ELF1	chr13:41506054-41593508	ctrl	dox	OK	7.10156	3.32975	-1.09272	-2.00043	0.00055	0.00600319	yes	-1.09043
NCOA7	NCOA7	NCOA7	chr6:126102306-126253176	ctrl	dox	OK	7.40625	3.46903	-1.09421	-2.33708	0.0001	0.00140493	yes	-1.092
RPS6KA5	RPS6KA5	RPS6KA5	chr14:91337166-91526993	ctrl	dox	OK	11.0644	5.17123	-1.09735	-2.30029	0.0001	0.00140493	yes	-1.09586
B4GALT6	B4GALT6	B4GALT6	chr18:29202208-29264686	ctrl	dox	OK	10.605	4.94652	-1.10026	-2.28032	0.0002	0.00255224	yes	-1.0987
NUDT4P2	NUDT4P2	NUDT4P2	chr12:93771700-93797024	ctrl	dox	OK	86.8853	40.5613	-1.09901	-2.55947	5e-05	0.000758876	yes	-1.09882
DUSP10	DUSP10	DUSP10	chr1:221874761-221915518	ctrl	dox	OK	42.1816	19.6479	-1.10224	-2.79419	5e-05	0.000758876	yes	-1.10185
GAS2L3	GAS2L3	GAS2L3	chr12:100967488-101018685	ctrl	dox	OK	24.3272	11.3224	-1.1034	-2.51427	5e-05	0.000758876	yes	-1.10271
CTGF	CTGF	CTGF	chr6:132269316-132272518	ctrl	dox	OK	37.2981	17.3503	-1.10414	-2.79961	5e-05	0.000758876	yes	-1.1037
RAP2B	RAP2B	RAP2B	chr3:152880000-152888413	ctrl	dox	OK	15.2505	7.06837	-1.1094	-2.82335	5e-05	0.000758876	yes	-1.10831
ZNF365	ZNF365	ZNF365	chr10:64099346-64431771	ctrl	dox	OK	3.60804	1.66813	-1.11298	-1.73985	0.00315	0.0242012	yes	-1.10835
PDCD2L	PDCD2L	PDCD2L	chr19:34895302-34917072	ctrl	dox	OK	20.0518	9.28073	-1.11142	-2.05234	0.0006	0.00643164	yes	-1.11059
METTL8	METTL8	METTL8	chr2:172173912-172341562	ctrl	dox	OK	4.50049	2.07715	-1.11548	-1.7277	0.0049	0.0340215	yes	-1.11175
SH3BGRL	SH3BGRL	SH3BGRL	chrX:80369199-80554046	ctrl	dox	OK	57.1146	26.4213	-1.11216	-2.72707	5e-05	0.000758876	yes	-1.11186
C20orf27	C20orf27	C20orf27	chr20:3734145-3749035	ctrl	dox	OK	40.9009	18.9122	-1.11281	-2.64184	5e-05	0.000758876	yes	-1.11241
UTRN	UTRN	UTRN	chr6:144612872-145174170	ctrl	dox	OK	8.41467	3.88638	-1.11448	-2.96625	5e-05	0.000758876	yes	-1.11249
SORD	SORD	SORD	chr15:45315301-45367287	ctrl	dox	OK	21.8075	10.0778	-1.11364	-2.63148	5e-05	0.000758876	yes	-1.11287
DUSP19	DUSP19	DUSP19	chr2:183943286-183964722	ctrl	dox	OK	3.01399	1.38753	-1.11916	-1.67369	0.0049	0.0340215	yes	-1.11357
RAB32	RAB32	RAB32	chr6:146864827-146876086	ctrl	dox	OK	101.384	46.7937	-1.11544	-3.01988	5e-05	0.000758876	yes	-1.11528
COL13A1	COL13A1	COL13A1	chr10:71561643-71718904	ctrl	dox	OK	2.84618	1.30815	-1.12149	-1.59435	0.0067	0.0435548	yes	-1.11557
OSBP2	OSBP2	OSBP2	chr22:31089768-31303811	ctrl	dox	OK	2.70217	1.23848	-1.12554	-1.69512	0.00675	0.0438006	yes	-1.11927
LRRC8D	LRRC8D	LRRC8D	chr1:90286572-90401989	ctrl	dox	OK	12.9358	5.93763	-1.12341	-2.51181	5e-05	0.000758876	yes	-1.1221
EEF2K	EEF2K	EEF2K	chr16:22217591-22300066	ctrl	dox	OK	8.01744	3.67765	-1.12436	-2.66745	5e-05	0.000758876	yes	-1.12224
SYTL4	SYTL4	SYTL4	chrX:99929488-99987135	ctrl	dox	OK	10.0669	4.60718	-1.12766	-2.39966	0.0001	0.00140493	yes	-1.12597
RHOBTB1	RHOBTB1	RHOBTB1	chr10:62629197-62761198	ctrl	dox	OK	3.6167	1.64987	-1.13232	-1.81807	0.0029	0.0227378	yes	-1.12759
CD96	CD96	CD96	chr3:111260925-111371206	ctrl	dox	OK	13.9743	6.38805	-1.12933	-2.62415	5e-05	0.000758876	yes	-1.1281
SLC25A19	SLC25A19	SLC25A19	chr17:73267379-73285530	ctrl	dox	OK	9.99933	4.5692	-1.12989	-1.79146	0.00325	0.0248314	yes	-1.12818
EVA1A	EVA1A	EVA1A	chr2:75719443-75796848	ctrl	dox	OK	13.7622	6.28701	-1.13027	-2.15534	0.0004	0.00458914	yes	-1.12902
NTHL1	NTHL1	NTHL1	chr16:2089815-2097867	ctrl	dox	OK	25.3858	11.5898	-1.13116	-2.36789	5e-05	0.000758876	yes	-1.13049
DOPEY2	DOPEY2	DOPEY2	chr21:37536838-37666572	ctrl	dox	OK	1.06247	0.479611	-1.14748	-1.61708	0.0077	0.0487839	yes	-1.13123
PRNP	PRNP	PRNP	chr20:4666796-4682234	ctrl	dox	OK	110.815	50.505	-1.13365	-3.25138	5e-05	0.000758876	yes	-1.1335
GPR143	GPR143	GPR143	chrX:9693452-9734005	ctrl	dox	OK	15.085	6.86724	-1.13531	-2.1614	0.0005	0.00552122	yes	-1.13417
LMO4	LMO4	LMO4	chr1:87794150-87814607	ctrl	dox	OK	19.6484	8.89996	-1.14254	-2.84438	5e-05	0.000758876	yes	-1.14166
APOLD1	APOLD1	APOLD1	chr12:12878850-12944399	ctrl	dox	OK	16.8794	7.63755	-1.14408	-2.74787	5e-05	0.000758876	yes	-1.14305
PIP4K2A	PIP4K2A	PIP4K2A	chr10:22823765-23003503	ctrl	dox	OK	29.0617	13.1533	-1.14369	-2.86734	5e-05	0.000758876	yes	-1.14309
MAPRE2	MAPRE2	MAPRE2	chr18:32556891-32723432	ctrl	dox	OK	8.09473	3.65915	-1.14548	-2.29958	0.0002	0.00255224	yes	-1.14332
MEF2C	MEF2C	MEF2C	chr5:88014057-88328193	ctrl	dox	OK	7.11454	3.21302	-1.14684	-2.22924	0.00015	0.001995	yes	-1.14438
MEGF9	MEGF9	MEGF9	chr9:123363195-123476765	ctrl	dox	OK	4.96557	2.24016	-1.14836	-2.23149	0.0004	0.00458914	yes	-1.14483
ITGA4	ITGA4	ITGA4	chr2:182321618-182521834	ctrl	dox	OK	15.7587	7.11504	-1.14721	-2.66067	5e-05	0.000758876	yes	-1.14609
MAP3K5	MAP3K5	MAP3K5	chr6:136878186-137113656	ctrl	dox	OK	2.90402	1.30568	-1.15325	-1.90872	0.0014	0.0126955	yes	-1.1472
GTF2IRD1	GTF2IRD1	GTF2IRD1	chr7:73868119-74016920	ctrl	dox	OK	4.35519	1.9602	-1.15173	-2.01828	0.0014	0.0126955	yes	-1.1477
TMTC2	TMTC2	TMTC2	chr12:83080933-83528067	ctrl	dox	OK	21.8478	9.85216	-1.14897	-2.84653	5e-05	0.000758876	yes	-1.14817
NLN	NLN	NLN	chr5:65018022-65125111	ctrl	dox	OK	4.12172	1.85354	-1.15296	-2.31763	0.00015	0.001995	yes	-1.1487
ZFAND6	ZFAND6	ZFAND6	chr15:80351909-80430735	ctrl	dox	OK	70.9886	32.007	-1.1492	-2.90933	5e-05	0.000758876	yes	-1.14895
TDRD3	TDRD3	TDRD3	chr13:60970590-61148013	ctrl	dox	OK	7.97537	3.58909	-1.15193	-2.09326	0.00075	0.007695	yes	-1.14973
JAG1	JAG1	JAG1	chr20:10618331-10654694	ctrl	dox	OK	15.1461	6.81577	-1.152	-2.94666	5e-05	0.000758876	yes	-1.15083
EXT1	EXT1	EXT1	chr8:118811601-119124058	ctrl	dox	OK	23.4544	10.5527	-1.15224	-2.90761	5e-05	0.000758876	yes	-1.15149
ADA	ADA	ADA	chr20:43248162-43280376	ctrl	dox	OK	5.60921	2.51827	-1.15536	-1.69816	0.00375	0.0276628	yes	-1.15222
DTWD2	DTWD2	DTWD2	chr5:118172568-118324240	ctrl	dox	OK	11.1559	4.99973	-1.15788	-2.44341	5e-05	0.000758876	yes	-1.15629
TPD52L1	TPD52L1	TPD52L1	chr6:125474878-125584644	ctrl	dox	OK	29.8482	13.3761	-1.15798	-2.37608	0.0001	0.00140493	yes	-1.15739
ALX1	ALX1	ALX1	chr12:85674035-85695561	ctrl	dox	OK	9.07678	4.05998	-1.16071	-1.70225	0.00355	0.0265474	yes	-1.15875
DPYSL3	DPYSL3	DPYSL3	chr5:146770370-146889619	ctrl	dox	OK	20.8369	9.32386	-1.16014	-3.07535	5e-05	0.000758876	yes	-1.15929
DYNC2LI1	DYNC2LI1	DYNC2LI1	chr2:44001177-44037149	ctrl	dox	OK	17.1076	7.64038	-1.16292	-2.06118	0.0013	0.0119639	yes	-1.16188
SETDB2	SETDB2	SETDB2	chr13:50018428-50069139	ctrl	dox	OK	4.45541	1.975	-1.1737	-2.16184	0.0005	0.00552122	yes	-1.16965
GIMAP2	GIMAP2	GIMAP2	chr7:150382793-150390728	ctrl	dox	OK	17.1103	7.60043	-1.17071	-2.09279	0.0007	0.00729454	yes	-1.16966
ADAT2	ADAT2	ADAT2	chr6:143743968-143771841	ctrl	dox	OK	1.84261	0.812545	-1.18123	-1.69664	0.006	0.0400334	yes	-1.17139
SRRD	SRRD	SRRD	chr22:26879849-26908437	ctrl	dox	OK	46.6526	20.6691	-1.17448	-1.60106	0.00745	0.0475017	yes	-1.17409
ARHGAP5-AS1	ARHGAP5-AS1	ARHGAP5-AS1	chr14:32544624-32545905	ctrl	dox	OK	10.8894	4.79619	-1.18296	-1.80905	0.00285	0.0224536	yes	-1.18128
TRIM58	TRIM58	TRIM58	chr1:248020500-248043438	ctrl	dox	OK	2.46881	1.08283	-1.18902	-1.69352	0.00625	0.0412873	yes	-1.18158
SRM	SRM	SRM	chr1:11114648-11120091	ctrl	dox	OK	20.0225	8.82163	-1.1825	-2.39043	0.0001	0.00140493	yes	-1.18159
LOC730102	LOC730102	LOC730102	chr1:177975274-178007142	ctrl	dox	OK	4.3838	1.92607	-1.18652	-1.8082	0.00345	0.0259618	yes	-1.18234
THEM6	THEM6	THEM6	chr8:143808620-143818350	ctrl	dox	OK	20.179	8.88241	-1.18383	-2.6657	5e-05	0.000758876	yes	-1.18292
SHROOM3	SHROOM3	SHROOM3	chr4:77356252-77704405	ctrl	dox	OK	1.46011	0.637133	-1.19641	-2.01843	0.0009	0.00885452	yes	-1.18379
SGK3	SGK3	SGK3	chr8:67579786-67774257	ctrl	dox	OK	13.4056	5.88645	-1.18736	-2.55957	0.0001	0.00140493	yes	-1.18599
FSTL5	FSTL5	FSTL5	chr4:162305043-163085186	ctrl	dox	OK	25.1402	11.0201	-1.18986	-3.12115	5e-05	0.000758876	yes	-1.18912
DHCR7	DHCR7	DHCR7	chr11:71145456-71159477	ctrl	dox	OK	3.87728	1.69177	-1.19651	-1.69104	0.00405	0.0293572	yes	-1.19172
ARHGEF28	ARHGEF28	ARHGEF28	chr5:72921982-73237818	ctrl	dox	OK	2.90664	1.26562	-1.1995	-2.0916	0.0009	0.00885452	yes	-1.19311
SLC45A2	SLC45A2	SLC45A2	chr5:33944720-33984780	ctrl	dox	OK	6.96852	3.03739	-1.19802	-1.72686	0.00555	0.0375897	yes	-1.19535
PDE3B	PDE3B	PDE3B	chr11:14665268-14893604	ctrl	dox	OK	5.31779	2.31557	-1.19946	-2.3224	0.0001	0.00140493	yes	-1.19595
SLC1A4	SLC1A4	SLC1A4	chr2:65215578-65251000	ctrl	dox	OK	76.8994	33.5497	-1.19667	-3.26085	5e-05	0.000758876	yes	-1.19643
CHEK2	CHEK2	CHEK2	chr22:29083730-29137822	ctrl	dox	OK	6.61761	2.87743	-1.20153	-1.84866	0.0041	0.0296001	yes	-1.1987
LYZ	LYZ	LYZ	chr12:69742133-69748013	ctrl	dox	OK	27.5145	11.975	-1.20017	-2.39998	0.0003	0.00361996	yes	-1.19949
FOXP1	FOXP1	FOXP1	chr3:71003864-71633140	ctrl	dox	OK	3.6797	1.59346	-1.20743	-1.48756	0.0031	0.02394	yes	-1.20232
MOXD1	MOXD1	MOXD1	chr6:132617193-132722673	ctrl	dox	OK	23.7615	10.2774	-1.20915	-2.86567	5e-05	0.000758876	yes	-1.20835
CYP1A1	CYP1A1	CYP1A1	chr15:75011882-75017877	ctrl	dox	OK	4.9622	2.13973	-1.21355	-1.87957	0.00145	0.01305	yes	-1.20973
ARMC9	ARMC9	ARMC9	chr2:232063259-232240590	ctrl	dox	OK	30.5841	13.2104	-1.21111	-2.81521	5e-05	0.000758876	yes	-1.21049
SMYD3	SMYD3	SMYD3	chr1:245912641-246670644	ctrl	dox	OK	33.4632	14.4386	-1.21264	-2.69999	5e-05	0.000758876	yes	-1.21208
FAM81A	FAM81A	FAM81A	chr15:59730371-59815751	ctrl	dox	OK	3.24203	1.39256	-1.21915	-1.74137	0.00475	0.033263	yes	-1.21328
CAMK2D	CAMK2D	CAMK2D	chr4:114372187-114683083	ctrl	dox	OK	10.0511	4.32234	-1.21747	-2.44854	0.0001	0.00140493	yes	-1.21557
NCALD	NCALD	NCALD	chr8:102698769-103137135	ctrl	dox	OK	3.3346	1.42489	-1.22667	-1.80109	0.00255	0.0206147	yes	-1.22089
KITLG	KITLG	KITLG	chr12:88886569-88974250	ctrl	dox	OK	6.78547	2.90204	-1.22538	-2.33156	0.0001	0.00140493	yes	-1.22254
DACT1	DACT1	DACT1	chr14:59100785-59115038	ctrl	dox	OK	2.81293	1.19831	-1.23107	-1.75999	0.00705	0.0453702	yes	-1.2242
RAB27A	RAB27A	RAB27A	chr15:55495163-55582013	ctrl	dox	OK	11.3471	4.83092	-1.23195	-2.46197	0.00015	0.001995	yes	-1.23024
NMI	NMI	NMI	chr2:152126981-152146430	ctrl	dox	OK	7.65505	3.25636	-1.23315	-1.77449	0.00455	0.0320751	yes	-1.23061
ELOVL6	ELOVL6	ELOVL6	chr4:110970228-111119820	ctrl	dox	OK	6.00842	2.55275	-1.23493	-2.12863	0.0007	0.00729454	yes	-1.23169
ST3GAL6	ST3GAL6	ST3GAL6	chr3:98433176-98514689	ctrl	dox	OK	30.3627	12.9129	-1.23348	-3.07278	5e-05	0.000758876	yes	-1.23285
AKAP12	AKAP12	AKAP12	chr6:151561133-151679694	ctrl	dox	OK	12.3496	5.23233	-1.23893	-3.26203	5e-05	0.000758876	yes	-1.23735
RHOBTB3	RHOBTB3	RHOBTB3	chr5:95066849-95132071	ctrl	dox	OK	108.8	46.0638	-1.23997	-3.56852	5e-05	0.000758876	yes	-1.23979
POLR3G	POLR3G	POLR3G	chr5:89770680-89810369	ctrl	dox	OK	25.4644	10.7649	-1.24215	-2.90852	5e-05	0.000758876	yes	-1.24137
TFAP4	TFAP4	TFAP4	chr16:4307186-4323001	ctrl	dox	OK	8.16339	3.44695	-1.24385	-2.23089	0.0003	0.00361996	yes	-1.24143
KHDRBS3	KHDRBS3	KHDRBS3	chr8:136469715-136659848	ctrl	dox	OK	53.9678	22.8091	-1.24249	-3.25462	5e-05	0.000758876	yes	-1.24212
TRIM63	TRIM63	TRIM63	chr1:26377795-26394125	ctrl	dox	OK	6.50873	2.73339	-1.25168	-1.92157	0.00135	0.0123418	yes	-1.24863
CLIP4	CLIP4	CLIP4	chr2:29320541-29406679	ctrl	dox	OK	30.5832	12.8409	-1.252	-3.18177	5e-05	0.000758876	yes	-1.25134
HLA-DRA	HLA-DRA	HLA-DRA	chr6_ssto_hap7:3754282-3759493	ctrl	dox	OK	38.1046	15.9759	-1.25406	-2.5628	0.0001	0.00140493	yes	-1.25354
PRKCDBP	PRKCDBP	PRKCDBP	chr11:6340175-6341740	ctrl	dox	OK	94.4794	39.5467	-1.25644	-3.39882	5e-05	0.000758876	yes	-1.25623
ZNF689	ZNF689	ZNF689	chr16:30613878-30622096	ctrl	dox	OK	15.4145	6.43575	-1.26011	-2.86104	5e-05	0.000758876	yes	-1.2588
XK	XK	XK	chrX:37545132-37591383	ctrl	dox	OK	2.57722	1.0701	-1.26807	-1.83328	0.0032	0.0245015	yes	-1.26024
TAOK3	TAOK3	TAOK3	chr12:118587605-118810750	ctrl	dox	OK	9.04953	3.77095	-1.26292	-2.73972	5e-05	0.000758876	yes	-1.26069
ENPP1	ENPP1	ENPP1	chr6:132129155-132216295	ctrl	dox	OK	4.58038	1.90436	-1.26616	-2.37285	5e-05	0.000758876	yes	-1.26175
HSPB1	HSPB1	HSPB1	chr7:75931874-75933614	ctrl	dox	OK	75.6038	31.4362	-1.26603	-3.18401	5e-05	0.000758876	yes	-1.26576
MBLAC2	MBLAC2	MBLAC2	chr5:89754019-89770585	ctrl	dox	OK	5.66021	2.34081	-1.27385	-2.17291	0.00035	0.00411812	yes	-1.27024
TFPI2	TFPI2	TFPI2	chr7:93514708-93520303	ctrl	dox	OK	79.173	32.7443	-1.27376	-3.50741	5e-05	0.000758876	yes	-1.27351
IFI16	IFI16	IFI16	chr1:158979681-159024945	ctrl	dox	OK	24.6798	10.1762	-1.27813	-3.01338	5e-05	0.000758876	yes	-1.2773
CPED1	CPED1	CPED1	chr7:120628750-120937498	ctrl	dox	OK	19.7571	8.12895	-1.28123	-2.99309	5e-05	0.000758876	yes	-1.28019
CHN1	CHN1	CHN1	chr2:175664041-175870107	ctrl	dox	OK	7.65021	3.13634	-1.28642	-2.07343	0.0007	0.00729454	yes	-1.28371
GPR37	GPR37	GPR37	chr7:124385654-124406079	ctrl	dox	OK	1.17685	0.477274	-1.30204	-1.52687	0.0078	0.0492264	yes	-1.28433
SLAIN1	SLAIN1	SLAIN1	chr13:78271988-78338377	ctrl	dox	OK	6.29315	2.5766	-1.28832	-2.06773	0.00105	0.0100871	yes	-1.28502
SCN2A	SCN2A	SCN2A	chr2:166095911-166248820	ctrl	dox	OK	1.41923	0.576467	-1.2998	-1.8669	0.00265	0.0212225	yes	-1.28512
VWA5A	VWA5A	VWA5A	chr11:123986110-124017618	ctrl	dox	OK	9.07125	3.71567	-1.28768	-2.0497	0.00095	0.00928033	yes	-1.28539
STEAP1	STEAP1	STEAP1	chr7:89511666-89840949	ctrl	dox	OK	11.0745	4.52984	-1.28971	-1.91484	0.0013	0.0119639	yes	-1.28783
FHL2	FHL2	FHL2	chr2:105977282-106055230	ctrl	dox	OK	25.3496	10.3726	-1.28919	-2.66187	5e-05	0.000758876	yes	-1.28836
PARD6G	PARD6G	PARD6G	chr18:77905806-78005397	ctrl	dox	OK	10.4144	4.24417	-1.29503	-2.75085	5e-05	0.000758876	yes	-1.29301
MXI1	MXI1	MXI1	chr10:111967362-112047123	ctrl	dox	OK	39.5957	16.1263	-1.29592	-3.39023	5e-05	0.000758876	yes	-1.2954
GBP2	GBP2	GBP2	chr1:89571815-89591842	ctrl	dox	OK	2.90931	1.17846	-1.30378	-1.8755	0.00205	0.017305	yes	-1.29653
IRF4	IRF4	IRF4	chr6:391738-411443	ctrl	dox	OK	7.39359	3.00177	-1.30046	-2.615	5e-05	0.000758876	yes	-1.29761
BZW2	BZW2	BZW2	chr7:16685758-16746148	ctrl	dox	OK	94.9284	38.5018	-1.30191	-3.56373	5e-05	0.000758876	yes	-1.30169
LOC494127	LOC494127	LOC494127	chr9:89698800-89700140	ctrl	dox	OK	4.35047	1.75836	-1.30694	-1.68645	0.00515	0.035442	yes	-1.30207
XYLB	XYLB	XYLB	chr3:38388250-38456467	ctrl	dox	OK	5.45958	2.20796	-1.30607	-2.29748	0.0002	0.00255224	yes	-1.3022
SMIM10	SMIM10	SMIM10	chrX:134124967-134126503	ctrl	dox	OK	14.6001	5.91131	-1.30443	-2.33358	0.00015	0.001995	yes	-1.30298
AP1S2	AP1S2	AP1S2	chrX:15843928-15873137	ctrl	dox	OK	132.267	53.5446	-1.30464	-3.55555	5e-05	0.000758876	yes	-1.30448
KIAA1549L	KIAA1549L	KIAA1549L	chr11:33563876-33695646	ctrl	dox	OK	1.62377	0.650517	-1.31969	-2.2678	0.00035	0.00411812	yes	-1.30654
PRKD1	PRKD1	PRKD1	chr14:29896116-30396899	ctrl	dox	OK	6.46256	2.60558	-1.3105	-2.37281	5e-05	0.000758876	yes	-1.30721
MTUS1	MTUS1	MTUS1	chr8:17501302-17658426	ctrl	dox	OK	7.86902	3.1678	-1.3127	-2.44888	0.0001	0.00140493	yes	-1.30999
CRIM1	CRIM1	CRIM1	chr2:36583369-36778278	ctrl	dox	OK	41.3685	16.5769	-1.31936	-3.64768	5e-05	0.000758876	yes	-1.31884
FZD2	FZD2	FZD2	chr17:42634811-42638630	ctrl	dox	OK	3.60117	1.43742	-1.32499	-2.04981	0.0018	0.0155529	yes	-1.31898
GPR137B	GPR137B	GPR137B	chr1:236305831-236372209	ctrl	dox	OK	35.8081	14.326	-1.32165	-3.00255	5e-05	0.000758876	yes	-1.32105
SNX10	SNX10	SNX10	chr7:26331514-26413949	ctrl	dox	OK	42.0903	16.8067	-1.32446	-3.16069	5e-05	0.000758876	yes	-1.32394
L3HYPDH	L3HYPDH	L3HYPDH	chr14:59939405-59951073	ctrl	dox	OK	21.4078	8.54329	-1.32528	-2.54275	0.0001	0.00140493	yes	-1.32426
ITGA2	ITGA2	ITGA2	chr5:52285155-52390609	ctrl	dox	OK	5.24219	2.0866	-1.32902	-2.72195	5e-05	0.000758876	yes	-1.32487
SHROOM2	SHROOM2	SHROOM2	chrX:9754495-9917481	ctrl	dox	OK	3.78499	1.50389	-1.33159	-2.68617	0.0001	0.00140493	yes	-1.32584
LINC00461	LINC00461	LINC00461	chr5:87836596-87980620	ctrl	dox	OK	2.45277	0.971916	-1.33551	-1.63735	0.00475	0.033263	yes	-1.32661
HMGA2	HMGA2	HMGA2	chr12:66151799-66360071	ctrl	dox	OK	24.2641	9.6665	-1.32776	-3.23571	5e-05	0.000758876	yes	-1.32686
MSC	MSC	MSC	chr8:72753776-72987819	ctrl	dox	OK	11.6291	4.62564	-1.33002	-2.30181	0.0004	0.00458914	yes	-1.32814
ZNF311	ZNF311	ZNF311	chr6_ssto_hap7:303579-313918	ctrl	dox	OK	1.45402	0.571663	-1.34681	-1.60283	0.0054	0.0368658	yes	-1.33168
MME	MME	MME	chr3:154797435-154901518	ctrl	dox	OK	24.7796	9.83497	-1.33316	-3.46722	5e-05	0.000758876	yes	-1.33228
GAS1	GAS1	GAS1	chr9:89559276-89562104	ctrl	dox	OK	6.98328	2.76437	-1.33695	-2.30485	0.0004	0.00458914	yes	-1.33381
PHLDA1	PHLDA1	PHLDA1	chr12:76419226-76425556	ctrl	dox	OK	37.7604	14.9436	-1.33734	-3.69098	5e-05	0.000758876	yes	-1.33676
TNFRSF19	TNFRSF19	TNFRSF19	chr13:24144508-24250244	ctrl	dox	OK	4.66383	1.83905	-1.34255	-2.1383	0.00085	0.00846464	yes	-1.33782
IGF2BP3	IGF2BP3	IGF2BP3	chr7:23349827-23509995	ctrl	dox	OK	22.3239	8.77778	-1.34666	-3.26506	5e-05	0.000758876	yes	-1.34566
ANKRD44	ANKRD44	ANKRD44	chr2:197851385-198175521	ctrl	dox	OK	8.22696	3.22665	-1.35032	-2.4696	5e-05	0.000758876	yes	-1.34761
HLA-DMB	HLA-DMB	HLA-DMB	chr6_ssto_hap7:4333159-4339601	ctrl	dox	OK	5.60725	2.19678	-1.35191	-1.78028	0.0042	0.0302006	yes	-1.34792
CRYL1	CRYL1	CRYL1	chr13:20977805-21100012	ctrl	dox	OK	8.01514	3.14015	-1.35189	-2.02551	0.00075	0.007695	yes	-1.34911
KAT2B	KAT2B	KAT2B	chr3:20081523-20195896	ctrl	dox	OK	16.945	6.63826	-1.35198	-3.25485	5e-05	0.000758876	yes	-1.35066
ACTL8	ACTL8	ACTL8	chr1:18081807-18153558	ctrl	dox	OK	4.72728	1.84676	-1.35602	-1.75721	0.0042	0.0302006	yes	-1.35127
CUBN	CUBN	CUBN	chr10:16865964-17171816	ctrl	dox	OK	1.57235	0.61019	-1.36559	-2.25023	0.0006	0.00643164	yes	-1.35129
RNF144A	RNF144A	RNF144A	chr2:7052406-7184309	ctrl	dox	OK	16.1658	6.32551	-1.3537	-3.19345	5e-05	0.000758876	yes	-1.3523
ACN9	ACN9	ACN9	chr7:96745904-96811075	ctrl	dox	OK	17.8396	6.97797	-1.35421	-2.68245	5e-05	0.000758876	yes	-1.35295
MMP16	MMP16	MMP16	chr8:89049459-89339717	ctrl	dox	OK	16.0179	6.26377	-1.35459	-3.27937	5e-05	0.000758876	yes	-1.35318
IFIT3	IFIT3	IFIT3	chr10:91087575-91100725	ctrl	dox	OK	17.3873	6.78969	-1.35661	-2.86861	5e-05	0.000758876	yes	-1.35532
LINC00920	LINC00920	LINC00920	chr16:66442426-66444803	ctrl	dox	OK	14.5331	5.67189	-1.35744	-1.97327	0.0018	0.0155529	yes	-1.35589
MAT1A	MAT1A	MAT1A	chr10:82031575-82049434	ctrl	dox	OK	12.5757	4.88366	-1.36461	-2.9334	5e-05	0.000758876	yes	-1.3628
AOX1	AOX1	AOX1	chr2:201450730-201536217	ctrl	dox	OK	1.64772	0.634424	-1.37695	-1.86969	0.0014	0.0126955	yes	-1.36312
SOHLH2	SOHLH2	SOHLH2	chr13:36742344-36871992	ctrl	dox	OK	14.9728	5.80754	-1.36635	-2.63456	5e-05	0.000758876	yes	-1.36483
FN1	FN1	FN1	chr2:216225178-216300791	ctrl	dox	OK	85.9825	33.352	-1.36627	-3.74299	5e-05	0.000758876	yes	-1.36601
CDC16	CDC16	CDC16	chr13:115000361-115038150	ctrl	dox	OK	22.113	8.55729	-1.36967	-2.997	5e-05	0.000758876	yes	-1.36864
AHR	AHR	AHR	chr7:17338275-17385775	ctrl	dox	OK	28.6892	11.0935	-1.37079	-3.73619	5e-05	0.000758876	yes	-1.37
DST	DST	DST	chr6:56137688-56819426	ctrl	dox	OK	9.21844	3.55947	-1.37286	-3.58192	5e-05	0.000758876	yes	-1.37038
SPP1	SPP1	SPP1	chr4:88896801-88904563	ctrl	dox	OK	13.2727	5.11275	-1.37629	-2.25182	0.0003	0.00361996	yes	-1.37456
LRAT	LRAT	LRAT	chr4:155665162-155674270	ctrl	dox	OK	2.81252	1.07194	-1.39164	-2.00824	0.0011	0.0104944	yes	-1.38336
TM7SF3	TM7SF3	TM7SF3	chr12:27124505-27167339	ctrl	dox	OK	39.8034	15.2487	-1.3842	-3.73077	5e-05	0.000758876	yes	-1.38362
LOC100505549	LOC100505549	LOC100505549	chr18:55297533-55470327	ctrl	dox	OK	4.87444	1.85839	-1.39118	-1.73492	0.00455	0.0320751	yes	-1.3864
PSAT1	PSAT1	PSAT1	chr9:80911990-80945009	ctrl	dox	OK	27.9599	10.6709	-1.38968	-2.9543	5e-05	0.000758876	yes	-1.38884
CDH7	CDH7	CDH7	chr18:63417487-63548175	ctrl	dox	OK	1.97393	0.747069	-1.40175	-1.67416	0.00775	0.0490314	yes	-1.38986
SLC19A3	SLC19A3	SLC19A3	chr2:228549925-228582745	ctrl	dox	OK	3.17524	1.20279	-1.40048	-1.98576	0.00095	0.00928033	yes	-1.39307
CFD	CFD	CFD	chr19:859664-863610	ctrl	dox	OK	3.63014	1.37398	-1.40166	-1.69319	0.0036	0.0267874	yes	-1.39517
PLSCR4	PLSCR4	PLSCR4	chr3:145910123-145968966	ctrl	dox	OK	2.7263	1.02749	-1.40783	-1.6969	0.00535	0.036594	yes	-1.39913
RNF150	RNF150	RNF150	chr4:141786724-142054616	ctrl	dox	OK	1.37785	0.51499	-1.4198	-1.76326	0.00225	0.0185998	yes	-1.40249
CNKSR2	CNKSR2	CNKSR2	chrX:21392535-21672813	ctrl	dox	OK	2.75791	1.03628	-1.41216	-2.23087	0.0001	0.00140493	yes	-1.40353
LDLRAD3	LDLRAD3	LDLRAD3	chr11:35965611-36252841	ctrl	dox	OK	16.0992	6.04991	-1.41201	-2.9731	5e-05	0.000758876	yes	-1.41052
SAMD5	SAMD5	SAMD5	chr6:147829827-147891157	ctrl	dox	OK	2.8932	1.08033	-1.42119	-2.13477	0.0003	0.00361996	yes	-1.41288
DTWD1	DTWD1	DTWD1	chr15:49913225-49937333	ctrl	dox	OK	9.87853	3.70128	-1.41627	-2.4215	5e-05	0.000758876	yes	-1.41384
KCNS3	KCNS3	KCNS3	chr2:18059113-18114225	ctrl	dox	OK	23.612	8.84472	-1.41663	-3.10257	5e-05	0.000758876	yes	-1.41561
RASSF3	RASSF3	RASSF3	chr12:65004292-65091347	ctrl	dox	OK	44.9135	16.755	-1.42256	-3.7677	5e-05	0.000758876	yes	-1.42202
DTNA	DTNA	DTNA	chr18:32073253-32471808	ctrl	dox	OK	6.19842	2.30677	-1.42603	-2.34363	0.0001	0.00140493	yes	-1.42211
TXNRD1	TXNRD1	TXNRD1	chr12:104609556-104744085	ctrl	dox	OK	193.867	72.3349	-1.4223	-3.81471	5e-05	0.000758876	yes	-1.42218
FRMD3	FRMD3	FRMD3	chr9:85857904-86153348	ctrl	dox	OK	5.35523	1.99113	-1.42736	-1.82206	0.0007	0.00729454	yes	-1.42283
OCA2	OCA2	OCA2	chr15:28000022-28344458	ctrl	dox	OK	2.25161	0.830871	-1.43826	-1.77261	0.0043	0.0307228	yes	-1.42739
LOC146481	LOC146481	LOC146481	chr16:34711784-34714967	ctrl	dox	OK	47.7357	17.7241	-1.42935	-3.32884	5e-05	0.000758876	yes	-1.42884
TNFRSF14	TNFRSF14	TNFRSF14	chr1:2487207-2495267	ctrl	dox	OK	21.2403	7.87673	-1.43113	-2.87724	5e-05	0.000758876	yes	-1.42998
ALDH1B1	ALDH1B1	ALDH1B1	chr9:38392660-38398662	ctrl	dox	OK	20.5823	7.6246	-1.43267	-3.39069	5e-05	0.000758876	yes	-1.43148
EPHA3	EPHA3	EPHA3	chr3:89156673-89531284	ctrl	dox	OK	2.8743	1.05658	-1.4438	-2.08577	0.0007	0.00729454	yes	-1.43523
OASL	OASL	OASL	chr12:121458094-121477045	ctrl	dox	OK	4.53454	1.66722	-1.44351	-2.04447	0.0015	0.0134059	yes	-1.43806
TFPI	TFPI	TFPI	chr2:188328957-188419219	ctrl	dox	OK	11.0432	4.05592	-1.44505	-2.07931	0.0007	0.00729454	yes	-1.44281
UGT2B7	UGT2B7	UGT2B7	chr4:69962192-69978705	ctrl	dox	OK	4.1345	1.51246	-1.45081	-1.70374	0.00545	0.0371084	yes	-1.44479
MREG	MREG	MREG	chr2:216807313-216878346	ctrl	dox	OK	16.7444	6.13761	-1.44793	-3.03727	5e-05	0.000758876	yes	-1.44644
GNG11	GNG11	GNG11	chr7:93551015-93555826	ctrl	dox	OK	110.07	40.3788	-1.44675	-3.62955	5e-05	0.000758876	yes	-1.44653
STC2	STC2	STC2	chr5:172741725-172756506	ctrl	dox	OK	5.57367	2.03807	-1.45142	-2.84748	5e-05	0.000758876	yes	-1.44695
CELF2	CELF2	CELF2	chr10:11047258-11378672	ctrl	dox	OK	9.31313	3.40551	-1.4514	-3.28248	5e-05	0.000758876	yes	-1.44871
ETV1	ETV1	ETV1	chr7:13930855-14031050	ctrl	dox	OK	15.9373	5.81751	-1.45394	-3.31377	5e-05	0.000758876	yes	-1.45236
ATP8A1	ATP8A1	ATP8A1	chr4:42410391-42659122	ctrl	dox	OK	1.22785	0.441005	-1.47727	-1.92409	0.00255	0.0206147	yes	-1.45662
KCNH1	KCNH1	KCNH1	chr1:210851656-211307457	ctrl	dox	OK	1.14846	0.411956	-1.47913	-2.06589	0.0006	0.00643164	yes	-1.45704
CTLA4	CTLA4	CTLA4	chr2:204732510-204738683	ctrl	dox	OK	3.84854	1.38707	-1.47227	-1.80694	0.00185	0.0159084	yes	-1.46565
WIPF1	WIPF1	WIPF1	chr2:175424301-175547627	ctrl	dox	OK	7.25963	2.62185	-1.46931	-2.85291	5e-05	0.000758876	yes	-1.4658
MCTP2	MCTP2	MCTP2	chr15:94841429-95027181	ctrl	dox	OK	3.83362	1.38046	-1.47356	-2.09322	0.0003	0.00361996	yes	-1.4669
ALCAM	ALCAM	ALCAM	chr3:105085556-105295757	ctrl	dox	OK	83.0511	29.9182	-1.47298	-3.7754	5e-05	0.000758876	yes	-1.47267
COL4A5	COL4A5	COL4A5	chrX:107683073-107940775	ctrl	dox	OK	0.407589	0.140296	-1.53865	-1.67116	0.00695	0.0448552	yes	-1.47428
EYA1	EYA1	EYA1	chr8:72109667-72274467	ctrl	dox	OK	3.94148	1.41009	-1.48294	-2.17569	0.00065	0.00685708	yes	-1.47641
KIAA1211	KIAA1211	KIAA1211	chr4:57036360-57196890	ctrl	dox	OK	4.02367	1.43579	-1.48667	-2.89542	5e-05	0.000758876	yes	-1.48024
LINC00883	LINC00883	LINC00883	chr3:106959538-107045811	ctrl	dox	OK	5.72351	2.04491	-1.48486	-2.39419	5e-05	0.000758876	yes	-1.48034
BMPR1B	BMPR1B	BMPR1B	chr4:95679127-96079601	ctrl	dox	OK	2.41393	0.857717	-1.49281	-2.11165	0.00065	0.00685708	yes	-1.48205
ANKRD1	ANKRD1	ANKRD1	chr10:92671856-92681032	ctrl	dox	OK	82.6892	29.4885	-1.48755	-3.83296	5e-05	0.000758876	yes	-1.48723
RCHY1	RCHY1	RCHY1	chr4:76404246-76439640	ctrl	dox	OK	25.997	9.23062	-1.49385	-3.57544	5e-05	0.000758876	yes	-1.49284
LINC00622	LINC00622	LINC00622	chr1:120140324-120141914	ctrl	dox	OK	4.37472	1.54674	-1.49996	-1.70988	0.0078	0.0492264	yes	-1.49396
GJA3	GJA3	GJA3	chr13:20712394-20735183	ctrl	dox	OK	2.39483	0.843638	-1.50523	-2.15774	0.00065	0.00685708	yes	-1.49424
TNIK	TNIK	TNIK	chr3:170780291-171178197	ctrl	dox	OK	16.1506	5.69909	-1.50278	-1.82457	0.00225	0.0185998	yes	-1.50115
CDH19	CDH19	CDH19	chr18:64168423-64271375	ctrl	dox	OK	10.1678	3.58225	-1.50507	-3.09705	5e-05	0.000758876	yes	-1.50247
AKAP6	AKAP6	AKAP6	chr14:32798478-33302268	ctrl	dox	OK	0.585902	0.200259	-1.54879	-1.90561	0.0014	0.0126955	yes	-1.50291
NFIA	NFIA	NFIA	chr1:61542945-61928460	ctrl	dox	OK	0.930214	0.321326	-1.53352	-1.9321	0.00175	0.0152014	yes	-1.50474
PPM1H	PPM1H	PPM1H	chr12:63037762-63328665	ctrl	dox	OK	4.42988	1.54298	-1.52155	-2.75271	5e-05	0.000758876	yes	-1.51548
WWTR1	WWTR1	WWTR1	chr3:149235021-149421060	ctrl	dox	OK	37.4456	13.0462	-1.52117	-4.07559	5e-05	0.000758876	yes	-1.52045
ADAMTS1	ADAMTS1	ADAMTS1	chr21:28208605-28217728	ctrl	dox	OK	6.7895	2.35434	-1.52798	-2.99115	5e-05	0.000758876	yes	-1.52399
MARCKS	MARCKS	MARCKS	chr6:114178526-114184652	ctrl	dox	OK	58.9389	20.4137	-1.52968	-4.14234	5e-05	0.000758876	yes	-1.52922
RNF144B	RNF144B	RNF144B	chr6:18387580-18469105	ctrl	dox	OK	6.27709	2.1676	-1.534	-2.78769	5e-05	0.000758876	yes	-1.52965
DNER	DNER	DNER	chr2:230222344-230579286	ctrl	dox	OK	7.3897	2.55075	-1.53459	-2.70576	5e-05	0.000758876	yes	-1.5309
SLC27A5	SLC27A5	SLC27A5	chr19:59009699-59023432	ctrl	dox	OK	4.13012	1.42131	-1.53897	-2.25774	0.00075	0.007695	yes	-1.53234
ZNF280A	ZNF280A	ZNF280A	chr22:22868060-22874624	ctrl	dox	OK	1.51696	0.517185	-1.55243	-1.67991	0.00415	0.029925	yes	-1.53428
SERTAD4	SERTAD4	SERTAD4	chr1:210404803-210416440	ctrl	dox	OK	15.707	5.40911	-1.53795	-2.68995	5e-05	0.000758876	yes	-1.5362
NRN1	NRN1	NRN1	chr6:5998232-6007838	ctrl	dox	OK	19.2804	6.63793	-1.53833	-2.87796	5e-05	0.000758876	yes	-1.53691
SLC18B1	SLC18B1	SLC18B1	chr6:133090506-133119747	ctrl	dox	OK	14.9591	5.14767	-1.53903	-2.79335	5e-05	0.000758876	yes	-1.5372
ADAMTS6	ADAMTS6	ADAMTS6	chr5:64444562-64777704	ctrl	dox	OK	0.797079	0.267766	-1.57375	-1.8127	0.00355	0.0265474	yes	-1.53884
CD44	CD44	CD44	chr11:35160416-35253949	ctrl	dox	OK	51.6813	17.693	-1.54647	-4.15163	5e-05	0.000758876	yes	-1.54593
MDGA2	MDGA2	MDGA2	chr14:47308825-48144157	ctrl	dox	OK	0.862639	0.288782	-1.57878	-1.68535	0.00385	0.0282496	yes	-1.54629
CTSC	CTSC	CTSC	chr11:88026759-88070941	ctrl	dox	OK	78.7872	26.9225	-1.54915	-3.75565	5e-05	0.000758876	yes	-1.5488
CGN	CGN	CGN	chr1:151483861-151511167	ctrl	dox	OK	1.63767	0.552586	-1.56737	-2.26411	0.0005	0.00552122	yes	-1.55028
LAMA1	LAMA1	LAMA1	chr18:6941742-7117813	ctrl	dox	OK	6.44415	2.19289	-1.55516	-3.49498	5e-05	0.000758876	yes	-1.55083
CASP1	CASP1	CASP1	chr11:104896236-104905884	ctrl	dox	OK	8.21812	2.79298	-1.557	-2.17597	0.00065	0.00685708	yes	-1.5536
SMS	SMS	SMS	chrX:21958690-22012955	ctrl	dox	OK	189.491	64.4946	-1.55488	-4.51351	5e-05	0.000758876	yes	-1.55473
A2M	A2M	A2M	chr12:9217772-9268558	ctrl	dox	OK	15.9381	5.4005	-1.56131	-3.48492	5e-05	0.000758876	yes	-1.55955
FAM162A	FAM162A	FAM162A	chr3:122103022-122128961	ctrl	dox	OK	14.4319	4.88485	-1.56287	-2.2793	0.00075	0.007695	yes	-1.56092
DCBLD2	DCBLD2	DCBLD2	chr3:98514813-98620533	ctrl	dox	OK	112.014	37.9103	-1.56302	-4.24641	5e-05	0.000758876	yes	-1.56277
FZD4	FZD4	FZD4	chr11:86656716-86666440	ctrl	dox	OK	1.85829	0.621891	-1.57925	-2.29982	0.0004	0.00458914	yes	-1.56397
IMMP2L	IMMP2L	IMMP2L	chr7:110303105-111202573	ctrl	dox	OK	34.7307	11.7165	-1.56767	-3.02988	5e-05	0.000758876	yes	-1.56685
TM4SF1	TM4SF1	TM4SF1	chr3:149086804-149104370	ctrl	dox	OK	208.284	69.7913	-1.57744	-4.36523	5e-05	0.000758876	yes	-1.5773
BEX5	BEX5	BEX5	chrX:101408678-101410986	ctrl	dox	OK	6.29024	2.09504	-1.58614	-1.82487	0.0039	0.0284884	yes	-1.58156
ENPP2	ENPP2	ENPP2	chr8:120569316-120651106	ctrl	dox	OK	4.77547	1.58224	-1.59367	-2.27753	0.00045	0.00505616	yes	-1.5876
BEND6	BEND6	BEND6	chr6:56819772-56892142	ctrl	dox	OK	1.66141	0.544453	-1.60953	-1.80888	0.0039	0.0284884	yes	-1.59193
IRS1	IRS1	IRS1	chr2:227596032-227663506	ctrl	dox	OK	2.70091	0.888482	-1.60403	-2.80346	5e-05	0.000758876	yes	-1.59322
HDAC9	HDAC9	HDAC9	chr7:18126571-19036992	ctrl	dox	OK	29.6737	9.82451	-1.59473	-3.83969	5e-05	0.000758876	yes	-1.59375
EFNA5	EFNA5	EFNA5	chr5:106712589-107006596	ctrl	dox	OK	4.58795	1.51162	-1.60175	-2.67366	5e-05	0.000758876	yes	-1.59538
PCSK1	PCSK1	PCSK1	chr5:95726039-95768985	ctrl	dox	OK	2.11098	0.691751	-1.60959	-2.15216	0.0011	0.0104944	yes	-1.5957
ARSJ	ARSJ	ARSJ	chr4:114821439-114900878	ctrl	dox	OK	2.00055	0.65436	-1.61224	-2.15588	0.00095	0.00928033	yes	-1.59755
LIMA1	LIMA1	LIMA1	chr12:50569562-50677353	ctrl	dox	OK	33.6034	11.0938	-1.59885	-4.15357	5e-05	0.000758876	yes	-1.59798
AZGP1	AZGP1	AZGP1	chr7:99564349-99573735	ctrl	dox	OK	23.535	7.76344	-1.60004	-3.14684	5e-05	0.000758876	yes	-1.5988
LOC285000	LOC285000	LOC285000	chr2:106209553-106227016	ctrl	dox	OK	5.75006	1.88786	-1.60682	-1.98865	0.00215	0.0179634	yes	-1.60171
2016-09-11	2016-09-11	2016-09-11	chr4:77870894-77959768	ctrl	dox	OK	18.7915	6.17127	-1.60644	-3.94147	5e-05	0.000758876	yes	-1.60487
SLCO4A1	SLCO4A1	SLCO4A1	chr20:61273796-61303647	ctrl	dox	OK	15.6137	5.11669	-1.60953	-2.37199	5e-05	0.000758876	yes	-1.60764
LINC00472	LINC00472	LINC00472	chr6:72124148-72130448	ctrl	dox	OK	1.70611	0.551555	-1.62913	-1.80293	0.00405	0.0293572	yes	-1.61164
CARD16	CARD16	CARD16	chr11:104912052-104916051	ctrl	dox	OK	8.68853	2.83456	-1.61599	-1.96733	0.00175	0.0152014	yes	-1.61257
BHLHE41	BHLHE41	BHLHE41	chr12:26272958-26278003	ctrl	dox	OK	3.29506	1.06238	-1.63301	-2.37368	0.00035	0.00411812	yes	-1.62386
CITED2	CITED2	CITED2	chr6:139693391-139695787	ctrl	dox	OK	22.7183	7.32266	-1.63342	-3.35602	5e-05	0.000758876	yes	-1.63208
MOK	MOK	MOK	chr14:102690833-102771537	ctrl	dox	OK	52.9612	17.0462	-1.63549	-3.72933	5e-05	0.000758876	yes	-1.63491
F2R	F2R	F2R	chr5:76011867-76031595	ctrl	dox	OK	9.70066	3.11627	-1.63826	-3.08101	5e-05	0.000758876	yes	-1.63513
ESR1	ESR1	ESR1	chr6:152011630-152424408	ctrl	dox	OK	0.800161	0.250042	-1.67812	-1.73008	0.0037	0.027384	yes	-1.63946
CPM	CPM	CPM	chr12:69244955-69357020	ctrl	dox	OK	3.19196	1.01052	-1.65935	-2.65214	5e-05	0.000758876	yes	-1.64965
BCHE	BCHE	BCHE	chr3:165490691-165555253	ctrl	dox	OK	57.6282	18.203	-1.6626	-3.96963	5e-05	0.000758876	yes	-1.66206
STK32B	STK32B	STK32B	chr4:5053526-5502725	ctrl	dox	OK	8.62335	2.69775	-1.67649	-3.04612	5e-05	0.000758876	yes	-1.67283
MAP2K6	MAP2K6	MAP2K6	chr17:67410837-67538470	ctrl	dox	OK	5.47624	1.71026	-1.67897	-2.09116	0.0008	0.00807874	yes	-1.67319
MIR100HG	MIR100HG	MIR100HG	chr11:121959810-122073770	ctrl	dox	OK	4.08708	1.27297	-1.68287	-2.2832	0.0008	0.00807874	yes	-1.67511
FRK	FRK	FRK	chr6:116262692-116381921	ctrl	dox	OK	1.75467	0.54213	-1.69449	-1.88694	0.0029	0.0227378	yes	-1.67632
MATN2	MATN2	MATN2	chr8:98881310-99048946	ctrl	dox	OK	14.689	4.57969	-1.68142	-3.7766	5e-05	0.000758876	yes	-1.67925
DPYD	DPYD	DPYD	chr1:97543299-98386615	ctrl	dox	OK	17.5146	5.43986	-1.68691	-2.60057	5e-05	0.000758876	yes	-1.68509
FRMPD4	FRMPD4	FRMPD4	chrX:12156584-12742642	ctrl	dox	OK	0.384267	0.112255	-1.77534	-1.79271	0.00505	0.0348876	yes	-1.68928
COL6A3	COL6A3	COL6A3	chr2:238232654-238322850	ctrl	dox	OK	2.2044	0.674351	-1.70881	-2.55508	5e-05	0.000758876	yes	-1.69411
ARHGDIB	ARHGDIB	ARHGDIB	chr12:15094949-15114562	ctrl	dox	OK	10.1141	3.11189	-1.7005	-2.4015	0.00015	0.001995	yes	-1.6973
FCGR2A	FCGR2A	FCGR2A	chr1:161475204-161489360	ctrl	dox	OK	6.9369	2.12503	-1.70681	-2.67738	5e-05	0.000758876	yes	-1.70211
DLGAP1-AS2	DLGAP1-AS2	DLGAP1-AS2	chr18:3496029-4455266	ctrl	dox	OK	15.1531	4.64407	-1.70616	-2.08447	0.0009	0.00885452	yes	-1.704
SLC26A4	SLC26A4	SLC26A4	chr7:107296960-107358252	ctrl	dox	OK	1.24226	0.374351	-1.7305	-1.97767	0.0017	0.0148388	yes	-1.70404
SLC35F1	SLC35F1	SLC35F1	chr6:118228688-118638839	ctrl	dox	OK	4.18445	1.27705	-1.71222	-2.63798	5e-05	0.000758876	yes	-1.70441
FAM167B	FAM167B	FAM167B	chr1:32712817-32714461	ctrl	dox	OK	17.7184	5.41463	-1.71032	-2.58422	5e-05	0.000758876	yes	-1.70847
HIVEP3	HIVEP3	HIVEP3	chr1:41972035-42501596	ctrl	dox	OK	4.63187	1.40975	-1.71615	-1.94027	0.0029	0.0227378	yes	-1.70907
PAG1	PAG1	PAG1	chr8:81880045-82024303	ctrl	dox	OK	5.06933	1.54254	-1.71649	-3.56182	5e-05	0.000758876	yes	-1.71001
IL1RAPL1	IL1RAPL1	IL1RAPL1	chrX:28605680-29974017	ctrl	dox	OK	10.7435	3.27604	-1.71344	-2.97246	5e-05	0.000758876	yes	-1.71038
PPP2R2B	PPP2R2B	PPP2R2B	chr5:145969066-146461083	ctrl	dox	OK	0.790198	0.233699	-1.75756	-1.51885	0.00125	0.0116048	yes	-1.71526
2016-03-03	2016-03-03	2016-03-03	chr5:126203405-126366500	ctrl	dox	OK	12.7255	3.85818	-1.72173	-3.62745	5e-05	0.000758876	yes	-1.71913
MYB	MYB	MYB	chr6:135502452-135540311	ctrl	dox	OK	1.23989	0.369622	-1.74609	-1.87803	0.00125	0.0116048	yes	-1.71917
KHK	KHK	KHK	chr2:27309610-27341995	ctrl	dox	OK	2.0527	0.614598	-1.73981	-1.82131	0.00335	0.0254331	yes	-1.72353
RGS20	RGS20	RGS20	chr8:54764367-54871864	ctrl	dox	OK	20.1081	6.07519	-1.72677	-2.81031	5e-05	0.000758876	yes	-1.72512
RPLP0P2	RPLP0P2	RPLP0P2	chr11:61382507-61406921	ctrl	dox	OK	1.5382	0.457008	-1.75096	-2.05422	0.00175	0.0152014	yes	-1.72907
LOX	LOX	LOX	chr5:121398889-121414055	ctrl	dox	OK	4.4557	1.33291	-1.74108	-2.50495	0.0003	0.00361996	yes	-1.73352
RAB27B	RAB27B	RAB27B	chr18:52495707-52562747	ctrl	dox	OK	1.23803	0.363555	-1.7678	-1.86016	0.0057	0.0384317	yes	-1.74026
TRIM2	TRIM2	TRIM2	chr4:154074269-154260474	ctrl	dox	OK	70.5992	21.1005	-1.74237	-4.19047	5e-05	0.000758876	yes	-1.7419
LOC650368	LOC650368	LOC650368	chr11:3402190-3430378	ctrl	dox	OK	8.79153	2.61962	-1.74676	-2.31301	0.0003	0.00361996	yes	-1.7429
FJX1	FJX1	FJX1	chr11:35639734-35642421	ctrl	dox	OK	18.7237	5.57462	-1.74792	-3.81717	5e-05	0.000758876	yes	-1.7461
ADRA1B	ADRA1B	ADRA1B	chr5:159343739-159400017	ctrl	dox	OK	1.2221	0.356633	-1.77685	-1.91351	0.00245	0.0199772	yes	-1.74871
FAP	FAP	FAP	chr2:162970950-163100045	ctrl	dox	OK	2.36827	0.697628	-1.7633	-2.0311	0.00135	0.0123418	yes	-1.74885
PDE4B	PDE4B	PDE4B	chr1:66258192-66840262	ctrl	dox	OK	14.5947	4.32989	-1.75304	-3.71133	5e-05	0.000758876	yes	-1.7507
FLT1	FLT1	FLT1	chr13:28874482-29069265	ctrl	dox	OK	1.79733	0.526917	-1.77021	-1.90149	0.0033	0.0251279	yes	-1.75109
MYC	MYC	MYC	chr8:128748314-128753680	ctrl	dox	OK	13.4341	3.9685	-1.75923	-3.40594	5e-05	0.000758876	yes	-1.75668
AIM2	AIM2	AIM2	chr1:159032274-159046647	ctrl	dox	OK	4.66983	1.37245	-1.76662	-2.13933	0.00115	0.0108276	yes	-1.75923
FABP6	FABP6	FABP6	chr5:159614373-159665729	ctrl	dox	OK	10.1762	2.99138	-1.76631	-2.06005	0.00175	0.0152014	yes	-1.76292
CASC10	CASC10	CASC10	chr10:21783420-21786213	ctrl	dox	OK	4.41298	1.28628	-1.77855	-2.39765	0.0004	0.00458914	yes	-1.77064
AMPH	AMPH	AMPH	chr7:38423296-38671167	ctrl	dox	OK	2.25126	0.651537	-1.78881	-2.29817	0.00035	0.00411812	yes	-1.77323
CBR3	CBR3	CBR3	chr21:37504064-37528606	ctrl	dox	OK	15.3977	4.48967	-1.77803	-2.74109	0.0001	0.00140493	yes	-1.77576
AKR1C3	AKR1C3	AKR1C3	chr10:5090957-5149878	ctrl	dox	OK	3.66168	1.06194	-1.7858	-1.88278	0.00315	0.0242012	yes	-1.77622
ITIH5	ITIH5	ITIH5	chr10:7601231-7708961	ctrl	dox	OK	21.7694	6.336	-1.78066	-3.15371	5e-05	0.000758876	yes	-1.77904
SEMA5A	SEMA5A	SEMA5A	chr5:9035137-9546233	ctrl	dox	OK	0.424576	0.11649	-1.86582	-2.11346	0.001	0.00966882	yes	-1.78059
EPS8	EPS8	EPS8	chr12:15773074-15942510	ctrl	dox	OK	46.8038	13.6157	-1.78135	-4.78789	5e-05	0.000758876	yes	-1.7806
CD70	CD70	CD70	chr19:6585849-6591163	ctrl	dox	OK	20.0864	5.82588	-1.78567	-2.42342	5e-05	0.000758876	yes	-1.78391
PDE1C	PDE1C	PDE1C	chr7:31790792-32339016	ctrl	dox	OK	0.993749	0.280992	-1.82235	-1.83186	0.00365	0.0270697	yes	-1.78635
GAD1	GAD1	GAD1	chr2:171673199-171717659	ctrl	dox	OK	3.99482	1.14652	-1.80086	-2.05595	0.0017	0.0148388	yes	-1.79195
SOX5	SOX5	SOX5	chr12:23685230-24715383	ctrl	dox	OK	4.67348	1.34202	-1.80009	-2.87207	0.0001	0.00140493	yes	-1.79246
KIAA1598	KIAA1598	KIAA1598	chr10:118642887-118886097	ctrl	dox	OK	10.9988	3.16188	-1.79849	-3.78639	5e-05	0.000758876	yes	-1.79525
NRROS	NRROS	NRROS	chr3:196366655-196388874	ctrl	dox	OK	1.25355	0.353521	-1.82615	-1.95986	0.0015	0.0134059	yes	-1.79737
GPR65	GPR65	GPR65	chr14:88471467-88481155	ctrl	dox	OK	10.3544	2.97089	-1.80127	-3.38254	5e-05	0.000758876	yes	-1.79782
PHEX	PHEX	PHEX	chrX:22050561-22269427	ctrl	dox	OK	0.513824	0.139857	-1.87732	-1.81414	0.00305	0.0236148	yes	-1.8055
OSBPL10	OSBPL10	OSBPL10	chr3:31702316-32033228	ctrl	dox	OK	13.4971	3.83907	-1.81382	-3.93875	5e-05	0.000758876	yes	-1.81114
TMEM173	TMEM173	TMEM173	chr5:138855112-138862343	ctrl	dox	OK	4.26179	1.20204	-1.82598	-2.45256	0.00035	0.00411812	yes	-1.8174
AGMO	AGMO	AGMO	chr7:15239942-15601640	ctrl	dox	OK	1.12937	0.312819	-1.85212	-1.77002	0.00625	0.0412873	yes	-1.81944
SEMA6A	SEMA6A	SEMA6A	chr5:115779250-115910551	ctrl	dox	OK	4.1816	1.17271	-1.83421	-3.24271	5e-05	0.000758876	yes	-1.8254
SLC7A11	SLC7A11	SLC7A11	chr4:138948576-139163503	ctrl	dox	OK	21.1844	5.96834	-1.8276	-4.41181	5e-05	0.000758876	yes	-1.82587
PCBD1	PCBD1	PCBD1	chr10:72643264-72648543	ctrl	dox	OK	19.0958	5.37108	-1.82997	-2.92071	5e-05	0.000758876	yes	-1.82804
SRGN	SRGN	SRGN	chr10:70847827-70864567	ctrl	dox	OK	9.96108	2.79824	-1.83178	-2.40515	0.0002	0.00255224	yes	-1.82808
LSAMP	LSAMP	LSAMP	chr3:115521209-116164385	ctrl	dox	OK	3.27347	0.914527	-1.83972	-3.13284	5e-05	0.000758876	yes	-1.82843
FRAS1	FRAS1	FRAS1	chr4:78978723-79465423	ctrl	dox	OK	0.16813	0.0400823	-2.06854	-1.93312	0.00165	0.0145011	yes	-1.83056
FAM184B	FAM184B	FAM184B	chr4:17633708-17783135	ctrl	dox	OK	1.42241	0.388815	-1.87118	-2.4253	0.00015	0.001995	yes	-1.84465
LINC00520	LINC00520	LINC00520	chr14:56247852-56263392	ctrl	dox	OK	32.5472	9.00212	-1.8542	-3.95481	5e-05	0.000758876	yes	-1.85304
RGS17	RGS17	RGS17	chr6:153332031-153452389	ctrl	dox	OK	3.31095	0.90359	-1.8735	-2.0623	0.0019	0.0162527	yes	-1.86198
TFAP2A	TFAP2A	TFAP2A	chr6:10396915-10419797	ctrl	dox	OK	3.45999	0.942305	-1.8765	-2.43235	0.0004	0.00458914	yes	-1.86544
PLXDC2	PLXDC2	PLXDC2	chr10:20105371-20578784	ctrl	dox	OK	0.733755	0.193279	-1.92461	-2.32994	0.0002	0.00255224	yes	-1.87137
KCNN2	KCNN2	KCNN2	chr5:113698015-113832197	ctrl	dox	OK	35.1769	9.5543	-1.88041	-3.85308	5e-05	0.000758876	yes	-1.87931
BTN3A3	BTN3A3	BTN3A3	chr6:26440699-26453643	ctrl	dox	OK	2.0193	0.541316	-1.89931	-2.12563	0.0011	0.0104944	yes	-1.88003
XIRP2	XIRP2	XIRP2	chr2:167744996-168116261	ctrl	dox	OK	1.07446	0.28452	-1.91701	-1.83546	0.0042	0.0302006	yes	-1.88054
INPP4B	INPP4B	INPP4B	chr4:142949181-143767604	ctrl	dox	OK	47.9508	13.0119	-1.88172	-4.87647	5e-05	0.000758876	yes	-1.88092
ACP5	ACP5	ACP5	chr19:11685474-11689801	ctrl	dox	OK	26.4476	7.15694	-1.88572	-3.70777	5e-05	0.000758876	yes	-1.88425
SAT1	SAT1	SAT1	chrX:23801274-23804327	ctrl	dox	OK	159.622	43.1914	-1.88584	-4.84488	5e-05	0.000758876	yes	-1.8856
TNFSF15	TNFSF15	TNFSF15	chr9:117546914-117568408	ctrl	dox	OK	0.212636	0.0501969	-2.08272	-1.57421	0.0057	0.0384317	yes	-1.88693
NLGN1	NLGN1	NLGN1	chr3:173116237-174001139	ctrl	dox	OK	13.4487	3.62435	-1.89168	-3.78252	5e-05	0.000758876	yes	-1.88877
RND3	RND3	RND3	chr2:151324706-151344209	ctrl	dox	OK	44.0326	11.8773	-1.89037	-4.55733	5e-05	0.000758876	yes	-1.88948
RASEF	RASEF	RASEF	chr9:85594499-85678043	ctrl	dox	OK	27.4346	7.34102	-1.90194	-4.75408	5e-05	0.000758876	yes	-1.90051
IL18	IL18	IL18	chr11:112013973-112034840	ctrl	dox	OK	3.94236	1.04829	-1.91102	-2.04307	0.0007	0.00729454	yes	-1.90098
CARD6	CARD6	CARD6	chr5:40841409-40855456	ctrl	dox	OK	1.22384	0.319879	-1.93582	-2.18329	0.0004	0.00458914	yes	-1.90315
EPHA4	EPHA4	EPHA4	chr2:222282746-222437010	ctrl	dox	OK	4.50838	1.19789	-1.91212	-3.32781	5e-05	0.000758876	yes	-1.90332
ICOS	ICOS	ICOS	chr2:204801470-204826298	ctrl	dox	OK	2.94216	0.777508	-1.91995	-2.19157	0.0005	0.00552122	yes	-1.9064
LOC100287072	LOC100287072	LOC100287072	chr17:20615758-20641178	ctrl	dox	OK	0.716892	0.183517	-1.96585	-1.73027	0.00675	0.0438006	yes	-1.90928
TMTC1	TMTC1	TMTC1	chr12:29653745-29937692	ctrl	dox	OK	5.10862	1.35255	-1.91725	-3.45856	5e-05	0.000758876	yes	-1.90945
PHLDB2	PHLDB2	PHLDB2	chr3:111393522-111695364	ctrl	dox	OK	6.15056	1.62741	-1.91814	-3.52414	5e-05	0.000758876	yes	-1.91165
ZNF804A	ZNF804A	ZNF804A	chr2:185463092-185804214	ctrl	dox	OK	0.891902	0.22788	-1.96861	-2.02547	0.0022	0.0182875	yes	-1.92274
LPXN	LPXN	LPXN	chr11:58294343-58345639	ctrl	dox	OK	59.0824	15.5481	-1.92599	-4.5369	5e-05	0.000758876	yes	-1.92531
2016-03-04	2016-03-04	2016-03-04	chr2:217122584-217236750	ctrl	dox	OK	0.442905	0.109222	-2.01973	-1.9135	0.0033	0.0251279	yes	-1.92556
FRMD5	FRMD5	FRMD5	chr15:44162958-44487492	ctrl	dox	OK	12.3722	3.2348	-1.93535	-4.17856	5e-05	0.000758876	yes	-1.93207
GPM6B	GPM6B	GPM6B	chrX:13789061-13956831	ctrl	dox	OK	21.8816	5.71714	-1.93635	-3.44007	5e-05	0.000758876	yes	-1.93449
FAM84B	FAM84B	FAM84B	chr8:127564682-127570711	ctrl	dox	OK	18.8306	4.90725	-1.94009	-4.46458	5e-05	0.000758876	yes	-1.93792
LOC100288911	LOC100288911	LOC100288911	chr2:36581891-36582713	ctrl	dox	OK	2.9543	0.762321	-1.95435	-1.96143	0.00145	0.01305	yes	-1.94042
FAM198B	FAM198B	FAM198B	chr4:159045731-159094202	ctrl	dox	OK	3.50905	0.905927	-1.95361	-2.83222	5e-05	0.000758876	yes	-1.94188
PPARGC1B	PPARGC1B	PPARGC1B	chr5:149109814-149234585	ctrl	dox	OK	0.529991	0.130144	-2.02586	-2.39541	0.00045	0.00505616	yes	-1.94603
ARHGAP29	ARHGAP29	ARHGAP29	chr1:94634462-94703307	ctrl	dox	OK	5.75181	1.48509	-1.95347	-3.87428	5e-05	0.000758876	yes	-1.94629
CABLES1	CABLES1	CABLES1	chr18:20714527-20840434	ctrl	dox	OK	18.5968	4.80277	-1.95312	-4.55898	5e-05	0.000758876	yes	-1.95089
RXFP1	RXFP1	RXFP1	chr4:159442865-159574521	ctrl	dox	OK	5.78405	1.48831	-1.95841	-2.66334	0.00015	0.001995	yes	-1.95124
KYNU	KYNU	KYNU	chr2:143635194-143799885	ctrl	dox	OK	67.4479	17.3958	-1.95504	-4.64408	5e-05	0.000758876	yes	-1.95442
WDR72	WDR72	WDR72	chr15:53805937-54055075	ctrl	dox	OK	2.92952	0.745803	-1.9738	-2.59219	0.0003	0.00361996	yes	-1.9595
PEX5L	PEX5L	PEX5L	chr3:179512746-179754841	ctrl	dox	OK	2.2756	0.573595	-1.98814	-2.61715	5e-05	0.000758876	yes	-1.96953
PRUNE2	PRUNE2	PRUNE2	chr9:79226291-79521003	ctrl	dox	OK	1.141	0.282664	-2.01314	-2.95488	5e-05	0.000758876	yes	-1.97557
CPA4	CPA4	CPA4	chr7:129932973-129964020	ctrl	dox	OK	1.7029	0.422043	-2.01253	-2.19037	0.0006	0.00643164	yes	-1.98719
LOC101930452	LOC101930452	LOC101930452	chr12:9520059-9550213	ctrl	dox	OK	5.09763	1.27552	-1.99874	-3.10548	5e-05	0.000758876	yes	-1.9903
LIMCH1	LIMCH1	LIMCH1	chr4:41361623-41702061	ctrl	dox	OK	7.55311	1.89255	-1.99674	-3.54789	5e-05	0.000758876	yes	-1.99105
HKDC1	HKDC1	HKDC1	chr10:70980058-71027315	ctrl	dox	OK	0.681927	0.163417	-2.06106	-2.08828	0.0015	0.0134059	yes	-1.99637
MID1	MID1	MID1	chrX:10413349-10851809	ctrl	dox	OK	14.1151	3.50903	-2.0081	-4.24848	5e-05	0.000758876	yes	-2.00501
MGST1	MGST1	MGST1	chr12:16500075-16530123	ctrl	dox	OK	16.0982	3.97743	-2.01699	-2.47863	5e-05	0.000758876	yes	-2.01426
VGLL3	VGLL3	VGLL3	chr3:86987122-87040257	ctrl	dox	OK	1.04458	0.250122	-2.06222	-2.28004	0.0027	0.0215556	yes	-2.01941
PRRG4	PRRG4	PRRG4	chr11:32851480-32879669	ctrl	dox	OK	4.85242	1.18686	-2.03156	-3.15077	5e-05	0.000758876	yes	-2.02242
DYNC1I1	DYNC1I1	DYNC1I1	chr7:95401817-95739634	ctrl	dox	OK	4.42674	1.08159	-2.03308	-2.6095	0.0002	0.00255224	yes	-2.02307
MCTP1	MCTP1	MCTP1	chr5:94042288-94620279	ctrl	dox	OK	8.7095	2.13244	-2.03008	-3.3799	5e-05	0.000758876	yes	-2.02499
RP1	RP1	RP1	chr8:55528626-55543394	ctrl	dox	OK	1.69225	0.40798	-2.05237	-2.46439	0.0003	0.00361996	yes	-2.02594
SGCD	SGCD	SGCD	chr5:155753766-156194798	ctrl	dox	OK	7.01607	1.7083	-2.03811	-2.36973	0.00025	0.00312152	yes	-2.03174
FAM19A2	FAM19A2	FAM19A2	chr12:62102028-62586620	ctrl	dox	OK	2.29426	0.552793	-2.05322	-2.50943	0.0002	0.00255224	yes	-2.03363
PEG10	PEG10	PEG10	chr7:94285636-94299006	ctrl	dox	OK	12.8811	3.11293	-2.04891	-4.64608	5e-05	0.000758876	yes	-2.0454
B3GALT1	B3GALT1	B3GALT1	chr2:168675181-168727366	ctrl	dox	OK	1.09223	0.256754	-2.08882	-1.78236	0.0077	0.0487839	yes	-2.04684
TNFSF13B	TNFSF13B	TNFSF13B	chr13:108921976-108960832	ctrl	dox	OK	1.10299	0.258777	-2.09164	-2.05558	0.0012	0.0112102	yes	-2.04996
AGPAT9	AGPAT9	AGPAT9	chr4:84457066-84527027	ctrl	dox	OK	54.3276	13.0873	-2.05352	-5.01683	5e-05	0.000758876	yes	-2.05268
ALDH16A1	ALDH16A1	ALDH16A1	chr19:49956472-49974305	ctrl	dox	OK	16.3163	3.90928	-2.06134	-4.39289	5e-05	0.000758876	yes	-2.05854
STK32A	STK32A	STK32A	chr5:146614578-146767418	ctrl	dox	OK	4.39885	1.04495	-2.07369	-1.95112	0.00225	0.0185998	yes	-2.06323
ARID5B	ARID5B	ARID5B	chr10:63661012-63856707	ctrl	dox	OK	2.40389	0.566797	-2.08447	-3.08714	5e-05	0.000758876	yes	-2.06522
TEX41	TEX41	TEX41	chr2:145425533-145834291	ctrl	dox	OK	1.72224	0.403237	-2.09459	-2.34245	0.0002	0.00255224	yes	-2.0676
SLC6A15	SLC6A15	SLC6A15	chr12:85253266-85306608	ctrl	dox	OK	28.1826	6.66765	-2.07956	-4.5565	5e-05	0.000758876	yes	-2.0779
ALPK1	ALPK1	ALPK1	chr4:113218498-113363764	ctrl	dox	OK	2.46833	0.575924	-2.09958	-2.71762	0.0001	0.00140493	yes	-2.08058
VEGFC	VEGFC	VEGFC	chr4:177604684-177713899	ctrl	dox	OK	1.4176	0.325869	-2.12108	-2.24675	0.00075	0.007695	yes	-2.08762
STAMBPL1	STAMBPL1	STAMBPL1	chr10:90639943-90683259	ctrl	dox	OK	12.2136	2.8595	-2.09466	-3.58013	5e-05	0.000758876	yes	-2.0908
ST6GALNAC3	ST6GALNAC3	ST6GALNAC3	chr1:76540388-77096669	ctrl	dox	OK	3.20926	0.742228	-2.11231	-2.16582	0.00115	0.0108276	yes	-2.09749
KRT27	KRT27	KRT27	chr17:38933059-38938786	ctrl	dox	OK	2.4197	0.556823	-2.11954	-2.21954	0.00055	0.00600319	yes	-2.09981
CYP39A1	CYP39A1	CYP39A1	chr6:46517316-46620567	ctrl	dox	OK	1.11064	0.250888	-2.14627	-1.79126	0.00305	0.0236148	yes	-2.10282
ARHGAP15	ARHGAP15	ARHGAP15	chr2:143886898-144525921	ctrl	dox	OK	1.12296	0.252802	-2.15122	-2.02198	0.0034	0.0257365	yes	-2.10805
ANKRD30B	ANKRD30B	ANKRD30B	chr18:14748238-14852737	ctrl	dox	OK	1.83344	0.41745	-2.13488	-2.79149	5e-05	0.000758876	yes	-2.10857
ARMCX1	ARMCX1	ARMCX1	chrX:100805513-100809675	ctrl	dox	OK	24.4858	5.6495	-2.11575	-4.29716	5e-05	0.000758876	yes	-2.11379
TMEM27	TMEM27	TMEM27	chrX:15645438-15683154	ctrl	dox	OK	1.44041	0.322779	-2.15786	-1.95528	0.00615	0.0408219	yes	-2.12382
PCDH18	PCDH18	PCDH18	chr4:138440073-138453629	ctrl	dox	OK	0.302601	0.0617083	-2.29388	-1.89021	0.00335	0.0254331	yes	-2.12411
ZNF114	ZNF114	ZNF114	chr19:48774653-48790863	ctrl	dox	OK	18.2695	4.18301	-2.12682	-4.08442	5e-05	0.000758876	yes	-2.12417
RGS4	RGS4	RGS4	chr1:163038395-163046592	ctrl	dox	OK	4.00278	0.909892	-2.13723	-2.61555	0.0003	0.00361996	yes	-2.12507
ST8SIA1	ST8SIA1	ST8SIA1	chr12:22346324-22487648	ctrl	dox	OK	3.87091	0.877387	-2.14139	-3.6409	5e-05	0.000758876	yes	-2.12876
USP43	USP43	USP43	chr17:9548853-9633003	ctrl	dox	OK	0.911457	0.200677	-2.1833	-2.24868	0.0009	0.00885452	yes	-2.12888
LOC101928567	LOC101928567	LOC101928567	chr17:15709555-15721056	ctrl	dox	OK	2.04442	0.458754	-2.1559	-1.91866	0.0036	0.0267874	yes	-2.13183
LYST	LYST	LYST	chr1:235824330-236047008	ctrl	dox	OK	10.3121	2.32065	-2.15174	-3.52954	5e-05	0.000758876	yes	-2.14693
SEMA3A	SEMA3A	SEMA3A	chr7:83587658-83824217	ctrl	dox	OK	5.04906	1.11915	-2.17361	-3.50427	5e-05	0.000758876	yes	-2.16363
PTPRN2	PTPRN2	PTPRN2	chr7:157331749-158380482	ctrl	dox	OK	3.8833	0.857213	-2.17956	-3.13607	5e-05	0.000758876	yes	-2.16654
GEM	GEM	GEM	chr8:95261484-95274547	ctrl	dox	OK	6.44075	1.41026	-2.19127	-3.01635	0.0001	0.00140493	yes	-2.18331
SH2D5	SH2D5	SH2D5	chr1:21046224-21059133	ctrl	dox	OK	2.01395	0.435145	-2.21046	-2.87611	5e-05	0.000758876	yes	-2.18483
SYTL2	SYTL2	SYTL2	chr11:85405264-85522202	ctrl	dox	OK	15.9428	3.49842	-2.18813	-4.04068	5e-05	0.000758876	yes	-2.18492
FLRT2	FLRT2	FLRT2	chr14:85996487-86094270	ctrl	dox	OK	7.55784	1.6505	-2.19507	-4.22605	5e-05	0.000758876	yes	-2.18826
MYOF	MYOF	MYOF	chr10:95066185-95242074	ctrl	dox	OK	20.8067	4.54885	-2.19348	-5.40558	5e-05	0.000758876	yes	-2.191
SOCS2	SOCS2	SOCS2	chr12:93959403-93970521	ctrl	dox	OK	2.32232	0.495049	-2.22993	-2.368	0.0002	0.00255224	yes	-2.20727
AKR1D1	AKR1D1	AKR1D1	chr7:137761177-137803050	ctrl	dox	OK	0.411052	0.08039	-2.35423	-1.59565	0.00455	0.0320751	yes	-2.21976
MYPN	MYPN	MYPN	chr10:69865873-69971773	ctrl	dox	OK	0.307515	0.0579267	-2.40835	-1.87896	0.0005	0.00552122	yes	-2.22477
PRR16	PRR16	PRR16	chr5:119800018-120022964	ctrl	dox	OK	1.13543	0.232263	-2.28941	-2.11393	0.00285	0.0224536	yes	-2.24124
LOC731424	LOC731424	LOC731424	chr4:185764449-185768200	ctrl	dox	OK	0.699175	0.139852	-2.32175	-2.19224	0.00165	0.0145011	yes	-2.2426
RAB38	RAB38	RAB38	chr11:87846414-87908635	ctrl	dox	OK	38.7706	8.17092	-2.24639	-4.29016	5e-05	0.000758876	yes	-2.245
F13A1	F13A1	F13A1	chr6:6144310-6320924	ctrl	dox	OK	3.06987	0.639684	-2.26275	-2.30199	0.00105	0.0100871	yes	-2.24506
SLC1A1	SLC1A1	SLC1A1	chr9:4490426-4587469	ctrl	dox	OK	0.715878	0.14305	-2.32319	-2.09839	0.0016	0.0141308	yes	-2.24572
CD36	CD36	CD36	chr7:80231503-80308593	ctrl	dox	OK	2.25473	0.467219	-2.27078	-1.63341	0.0008	0.00807874	yes	-2.24662
MRGPRX4	MRGPRX4	MRGPRX4	chr11:18194383-18195827	ctrl	dox	OK	6.27855	1.31154	-2.25917	-2.61424	0.00025	0.00312152	yes	-2.25051
PCDH7	PCDH7	PCDH7	chr4:30722029-31148423	ctrl	dox	OK	5.60949	1.16726	-2.26474	-3.84808	5e-05	0.000758876	yes	-2.25501
KIAA1210	KIAA1210	KIAA1210	chrX:118212597-118284542	ctrl	dox	OK	0.222974	0.0384741	-2.53492	-2.18511	0.00215	0.0179634	yes	-2.26488
CASP4	CASP4	CASP4	chr11:104813593-104839325	ctrl	dox	OK	23.4602	4.82302	-2.28221	-4.04224	5e-05	0.000758876	yes	-2.27983
TLR4	TLR4	TLR4	chr9:120466452-120479769	ctrl	dox	OK	8.71919	1.78286	-2.29	-4.16629	5e-05	0.000758876	yes	-2.28358
LINC00518	LINC00518	LINC00518	chr6:10428017-10435055	ctrl	dox	OK	11.7667	2.33538	-2.33298	-3.69074	5e-05	0.000758876	yes	-2.32804
EXPH5	EXPH5	EXPH5	chr11:108376157-108464374	ctrl	dox	OK	0.201656	0.0318123	-2.66424	-2.35699	0.00135	0.0123418	yes	-2.33972
HIST1H2BD	HIST1H2BD	HIST1H2BD	chr6:26158348-26171576	ctrl	dox	OK	793.054	156.416	-2.34203	-6.33301	5e-05	0.000758876	yes	-2.34196
FLRT3	FLRT3	FLRT3	chr20:13976145-16033841	ctrl	dox	OK	4.71067	0.915325	-2.36358	-2.73729	0.0006	0.00643164	yes	-2.35096
DUSP6	DUSP6	DUSP6	chr12:89741601-89746636	ctrl	dox	OK	56.5441	11.0205	-2.35919	-5.97651	5e-05	0.000758876	yes	-2.35813
GRIK2	GRIK2	GRIK2	chr6:101846860-102517958	ctrl	dox	OK	3.42201	0.651684	-2.3926	-3.01465	0.0001	0.00140493	yes	-2.37484
NAV3	NAV3	NAV3	chr12:78225068-78606792	ctrl	dox	OK	2.36892	0.446064	-2.40891	-3.61218	5e-05	0.000758876	yes	-2.383
PLEKHS1	PLEKHS1	PLEKHS1	chr10:115511212-115542192	ctrl	dox	OK	1.15024	0.212312	-2.43768	-2.31694	0.0002	0.00255224	yes	-2.38377
IFLTD1	IFLTD1	IFLTD1	chr12:25629015-25801496	ctrl	dox	OK	1.30303	0.24151	-2.43172	-2.11589	0.0001	0.00140493	yes	-2.38421
PPARGC1A	PPARGC1A	PPARGC1A	chr4:23793643-23891700	ctrl	dox	OK	1.02439	0.18813	-2.44497	-2.08173	0.00575	0.0386093	yes	-2.38426
CA3	CA3	CA3	chr8:86351055-86361267	ctrl	dox	OK	1.54741	0.287357	-2.42893	-2.15	0.00275	0.0218382	yes	-2.38888
PNLIPRP3	PNLIPRP3	PNLIPRP3	chr10:118187423-118237468	ctrl	dox	OK	0.70218	0.12547	-2.4845	-1.95509	0.00735	0.0469474	yes	-2.39427
HTR7	HTR7	HTR7	chr10:92500575-92617671	ctrl	dox	OK	14.4417	2.72354	-2.40668	-4.51475	5e-05	0.000758876	yes	-2.4024
TM4SF18	TM4SF18	TM4SF18	chr3:149036284-149051548	ctrl	dox	OK	12.7371	2.39818	-2.40902	-4.18905	5e-05	0.000758876	yes	-2.40415
GPNMB	GPNMB	GPNMB	chr7:23286315-23314729	ctrl	dox	OK	160.305	30.0196	-2.41684	-6.27794	5e-05	0.000758876	yes	-2.41645
TMEM255A	TMEM255A	TMEM255A	chrX:119392504-119445391	ctrl	dox	OK	8.08831	1.50352	-2.4275	-3.59626	5e-05	0.000758876	yes	-2.41971
GALNT3	GALNT3	GALNT3	chr2:166604312-166650803	ctrl	dox	OK	3.36408	0.61054	-2.46205	-2.77957	5e-05	0.000758876	yes	-2.4429
EDIL3	EDIL3	EDIL3	chr5:83236413-83680685	ctrl	dox	OK	0.784799	0.134532	-2.54438	-2.4132	0.0006	0.00643164	yes	-2.4592
TYR	TYR	TYR	chr11:88911039-89028927	ctrl	dox	OK	75.4728	13.3443	-2.49973	-5.6645	5e-05	0.000758876	yes	-2.49884
GPR85	GPR85	GPR85	chr7:112720467-112727833	ctrl	dox	OK	2.74817	0.474676	-2.53345	-2.8402	0.0001	0.00140493	yes	-2.50862
NEGR1	NEGR1	NEGR1	chr1:71868624-72748277	ctrl	dox	OK	2.84318	0.489912	-2.53691	-3.1191	5e-05	0.000758876	yes	-2.51282
UNC13C	UNC13C	UNC13C	chr15:54305100-54920806	ctrl	dox	OK	2.05324	0.350123	-2.55197	-3.23139	5e-05	0.000758876	yes	-2.51835
HAS2	HAS2	HAS2	chr8:122625270-122657564	ctrl	dox	OK	3.77267	0.649185	-2.53888	-2.74887	0.00025	0.00312152	yes	-2.52065
DNAJC12	DNAJC12	DNAJC12	chr10:69556426-69597937	ctrl	dox	OK	5.32433	0.913412	-2.54326	-2.35294	0.002	0.0169467	yes	-2.53026
LOC152225	LOC152225	LOC152225	chr3:101659702-101716770	ctrl	dox	OK	4.42029	0.756093	-2.54751	-2.7511	0.00015	0.001995	yes	-2.53181
LURAP1L	LURAP1L	LURAP1L	chr9:12775011-12823059	ctrl	dox	OK	0.664645	0.10663	-2.63997	-2.11596	0.00425	0.0304504	yes	-2.53219
RNF125	RNF125	RNF125	chr18:29598444-29653154	ctrl	dox	OK	10.296	1.73065	-2.57269	-4.69513	5e-05	0.000758876	yes	-2.56579
LOC101927821	LOC101927821	LOC101927821	chr21:23119304-23169735	ctrl	dox	OK	85.2023	14.3784	-2.56699	-4.7138	5e-05	0.000758876	yes	-2.56616
ARHGAP18	ARHGAP18	ARHGAP18	chr6:129898239-130031370	ctrl	dox	OK	40.1516	6.71816	-2.57932	-6.03354	5e-05	0.000758876	yes	-2.57753
RGS1	RGS1	RGS1	chr1:192544856-192549159	ctrl	dox	OK	23.7952	3.97654	-2.58108	-3.94015	5e-05	0.000758876	yes	-2.57807
EDNRB	EDNRB	EDNRB	chr13:78393071-78549664	ctrl	dox	OK	32.0235	5.33631	-2.58522	-5.193	5e-05	0.000758876	yes	-2.58297
MAP7D2	MAP7D2	MAP7D2	chrX:20024830-20135114	ctrl	dox	OK	0.524865	0.0791823	-2.7287	-2.17189	0.00095	0.00928033	yes	-2.58435
SEMA3C	SEMA3C	SEMA3C	chr7:80371853-80548667	ctrl	dox	OK	12.4638	2.027	-2.62032	-4.80415	5e-05	0.000758876	yes	-2.61438
LINC00326	LINC00326	LINC00326	chr6:133409218-133427717	ctrl	dox	OK	3.18851	0.509406	-2.64599	-2.57236	0.00025	0.00312152	yes	-2.62247
LOC100506258	LOC100506258	LOC100506258	chr11:7273180-7490276	ctrl	dox	OK	11.0267	1.78034	-2.63078	-4.50771	5e-05	0.000758876	yes	-2.624
ST6GALNAC5	ST6GALNAC5	ST6GALNAC5	chr1:77333185-77529737	ctrl	dox	OK	1.6958	0.262814	-2.68985	-2.65875	0.00045	0.00505616	yes	-2.64446
CITED1	CITED1	CITED1	chrX:71521487-71527037	ctrl	dox	OK	27.8313	4.43953	-2.64823	-3.91909	5e-05	0.000758876	yes	-2.6455
CCL20	CCL20	CCL20	chr2:228678557-228682280	ctrl	dox	OK	4.25325	0.670628	-2.66498	-2.52159	0.0011	0.0104944	yes	-2.64702
LOC100128682	LOC100128682	LOC100128682	chr19:35896508-35907742	ctrl	dox	OK	2.93635	0.458944	-2.67763	-3.28459	5e-05	0.000758876	yes	-2.65144
POU3F2	POU3F2	POU3F2	chr6:99282579-99286666	ctrl	dox	OK	10.1758	1.61116	-2.65896	-4.71075	5e-05	0.000758876	yes	-2.65146
IGSF11	IGSF11	IGSF11	chr3:118619478-118864898	ctrl	dox	OK	3.73247	0.583472	-2.67739	-3.26873	5e-05	0.000758876	yes	-2.65674
DNAH6	DNAH6	DNAH6	chr2:84743578-85046713	ctrl	dox	OK	2.29939	0.353647	-2.70087	-4.18367	5e-05	0.000758876	yes	-2.6669
PCLO	PCLO	PCLO	chr7:82383320-82792197	ctrl	dox	OK	16.3137	2.55888	-2.67249	-6.72778	5e-05	0.000758876	yes	-2.66776
LYPD1	LYPD1	LYPD1	chr2:133174146-133429070	ctrl	dox	OK	39.1066	6.09465	-2.6818	-5.58776	5e-05	0.000758876	yes	-2.6798
NOV	NOV	NOV	chr8:120428551-120436678	ctrl	dox	OK	52.7691	8.03631	-2.71509	-5.96337	5e-05	0.000758876	yes	-2.71357
TNC	TNC	TNC	chr9:117781853-117880536	ctrl	dox	OK	113.558	16.9904	-2.74064	-7.34513	5e-05	0.000758876	yes	-2.73992
ALDH1A1	ALDH1A1	ALDH1A1	chr9:75515577-75568233	ctrl	dox	OK	6.92888	1.0161	-2.76959	-3.2873	5e-05	0.000758876	yes	-2.75753
AKR1B10	AKR1B10	AKR1B10	chr7:134212343-134226166	ctrl	dox	OK	2.19277	0.309924	-2.82277	-2.5032	0.0008	0.00807874	yes	-2.78352
GBP3	GBP3	GBP3	chr1:89472359-89488549	ctrl	dox	OK	0.406245	0.0497671	-3.02909	-2.11173	0.0063	0.0415259	yes	-2.80001
[truncated: 84 more rows]

## Sheet: SKMEL2_unfiltered 
test_id	gene_id	gene	locus	sample_1	sample_2	status	value_1	value_2	log2(fold_change)	test_stat	p_value	q_value	significant	Adjust log2FC
SNORD87	SNORD87	SNORD87	chr8:67782983-67837777	ctrl	dox	OK	0	1260.13	inf	#NAME?	0.1684	0.421117	no	16.9432
SNORD47	SNORD47	SNORD47	chr1:173832385-173837125	ctrl	dox	OK	0	1113.81	inf	#NAME?	0.1958	0.457459	no	16.7652
SNORD28	SNORD28	SNORD28	chr11:62619459-62623360	ctrl	dox	OK	0	697.985	inf	#NAME?	0.20215	0.466641	no	16.0909
MIR6723	MIR6723	MIR6723	chr1:567704-567793	ctrl	dox	OK	0	401.655	inf	#NAME?	0.02935	0.133176	no	15.2937
MIR4307	MIR4307	MIR4307	chr14:27342338-27383949	ctrl	dox	OK	0	192.624	inf	#NAME?	0.19695	0.459192	no	14.2336
SNORD92	SNORD92	SNORD92	chr2:29117532-29171080	ctrl	dox	OK	0	111.919	inf	#NAME?	0.2119	0.478996	no	13.4503
MIR3960	MIR3960	MIR3960	chr9:130548111-130548286	ctrl	dox	OK	0	110.895	inf	#NAME?	0.04145	0.171049	no	13.437
MIR1282	MIR1282	MIR1282	chr15:44038589-44094769	ctrl	dox	OK	0	45.8591	inf	#NAME?	0.18495	0.442888	no	12.1633
SNORD116-2	SNORD116-2	SNORD116-2	chr15:25310171-25310269	ctrl	dox	OK	0	42.2451	inf	#NAME?	0.0787	0.265712	no	12.0449
MIR5047	MIR5047	MIR5047	chr17:62494373-62502484	ctrl	dox	OK	0	34.0722	inf	#NAME?	0.21665	0.485394	no	11.7348
MIR1248	MIR1248	MIR1248	chr3:186501360-186524484	ctrl	dox	OK	0	27.9665	inf	#NAME?	0.12045	0.348763	no	11.45
SNORD90	SNORD90	SNORD90	chr9:125611731-125667562	ctrl	dox	OK	0	21.0008	inf	#NAME?	0.2066	0.471707	no	11.0369
MIR6084	MIR6084	MIR6084	chr1:20959947-20988037	ctrl	dox	OK	0	14.4966	inf	#NAME?	0.2203	0.489844	no	10.5025
MIR212	MIR212	MIR212	chr17:1953564-1953674	ctrl	dox	OK	0	10.7017	inf	#NAME?	0.0768	0.261213	no	10.065
LCK	LCK	LCK	chr1:32716839-32751768	ctrl	dox	OK	0.0073783	16.4726	11.1245	1.51695	0.21705	0.485806	no	9.88944
SNAR-F	SNAR-F	SNAR-F	chr19:51108219-51108342	ctrl	dox	OK	0	9.34014	inf	#NAME?	0.12335	0.352274	no	9.86884
LCN2	LCN2	LCN2	chr9:130911731-130915734	ctrl	dox	OK	0	7.94223	inf	#NAME?	5e-05	0.000758876	yes	9.63522
MIR5188	MIR5188	MIR5188	chr12:125400092-125400205	ctrl	dox	OK	0	7.43666	inf	#NAME?	0.0768	0.261213	no	9.54045
FAM25A	FAM25A	FAM25A	chr10:88780045-88784487	ctrl	dox	OK	0	7.35705	inf	#NAME?	5e-05	0.000758876	yes	9.52494
CIDEA	CIDEA	CIDEA	chr18:12254317-12277594	ctrl	dox	OK	0	6.57166	inf	#NAME?	5e-05	0.000758876	yes	9.36231
MIR499A	MIR499A	MIR499A	chr20:33543637-33680618	ctrl	dox	OK	0	6.57162	inf	#NAME?	0.2341	0.505443	no	9.3623
PDCD1	PDCD1	PDCD1	chr2:242792032-242801058	ctrl	dox	OK	0	6.54438	inf	#NAME?	5e-05	0.000758876	yes	9.35632
LILRA3	LILRA3	LILRA3	chr19:54799849-54804265	ctrl	dox	OK	0.0103747	12.6002	10.2461	1.31272	0.2127	0.479898	no	9.2736
LOC102546229	LOC102546229	LOC102546229	chr5:133764741-133770738	ctrl	dox	OK	0	6.12794	inf	#NAME?	5e-05	0.000758876	yes	9.26161
WNT11	WNT11	WNT11	chr11:75897369-75917574	ctrl	dox	OK	0	4.6765	inf	#NAME?	5e-05	0.000758876	yes	8.87237
FRG2C	FRG2C	FRG2C	chrUn_gl000222:86422-89310	ctrl	dox	OK	0.0368854	21.0543	9.15685	5.22637	0.0569	0.213108	no	8.81145
SNORA36B	SNORA36B	SNORA36B	chr1:220321609-220445843	ctrl	dox	OK	0	3.70544	inf	#NAME?	0.2076	0.473208	no	8.53739
RNF223	RNF223	RNF223	chr1:1007125-1009687	ctrl	dox	OK	0.0181696	9.73029	9.06481	2.25257	0.17165	0.42469	no	8.43368
SNORA41	SNORA41	SNORA41	chr2:207024317-207027653	ctrl	dox	OK	0	3.43986	inf	#NAME?	0.20455	0.469054	no	8.43039
MOBP	MOBP	MOBP	chr3:39509063-39570988	ctrl	dox	OK	0.0345398	15.0773	8.7699	2.13521	0.06385	0.230484	no	8.40402
CHST13	CHST13	CHST13	chr3:126243130-126262134	ctrl	dox	OK	0	3.17727	inf	#NAME?	5e-05	0.000758876	yes	8.31618
FAM132A	FAM132A	FAM132A	chr1:1177825-1182102	ctrl	dox	OK	0	3.14991	inf	#NAME?	5e-05	0.000758876	yes	8.30374
SNORA29	SNORA29	SNORA29	chr6:160181290-160210735	ctrl	dox	OK	0	3.1352	inf	#NAME?	0.1728	0.425951	no	8.29701
CLVS1	CLVS1	CLVS1	chr8:62200524-62627199	ctrl	dox	OK	0	2.86421	inf	#NAME?	0.1392	0.378573	no	8.16702
CYBA	CYBA	CYBA	chr16:88709696-88717492	ctrl	dox	OK	0.0342061	12.5105	8.51467	2.31036	0.15555	0.402765	no	8.14583
INHBB	INHBB	INHBB	chr2:121103718-121109383	ctrl	dox	OK	0.00988322	5.58928	9.14347	3.51545	0.24545	0.517365	no	8.13755
C5orf27	C5orf27	C5orf27	chr5:95187935-95195836	ctrl	dox	OK	0.00887371	5.00899	9.14077	1.85894	0.1404	0.37988	no	8.05488
CEBPE	CEBPE	CEBPE	chr14:23586514-23588820	ctrl	dox	OK	0.0116079	5.61314	8.91756	2.04756	0.17165	0.42469	no	8.02367
NCMAP	NCMAP	NCMAP	chr1:24882566-24935818	ctrl	dox	OK	0	2.55217	inf	#NAME?	5e-05	0.000758876	yes	8.00122
SBK3	SBK3	SBK3	chr19:56052022-56056909	ctrl	dox	OK	0	2.47938	inf	#NAME?	5e-05	0.000758876	yes	7.95964
PGC	PGC	PGC	chr6:41704448-41715139	ctrl	dox	OK	0	2.46749	inf	#NAME?	5e-05	0.000758876	yes	7.95274
P2RX3	P2RX3	P2RX3	chr11:57105840-57137549	ctrl	dox	OK	0	2.3826	inf	#NAME?	5e-05	0.000758876	yes	7.90244
SBK2	SBK2	SBK2	chr19:56041099-56048435	ctrl	dox	OK	0	2.35909	inf	#NAME?	5e-05	0.000758876	yes	7.88819
TRIM29	TRIM29	TRIM29	chr11:119981993-120008863	ctrl	dox	OK	0.0526589	14.4486	8.10004	7.4425	0.00055	0.00600319	yes	7.85019
GPR37L1	GPR37L1	GPR37L1	chr1:202092028-202098634	ctrl	dox	OK	0.0179579	6.28392	8.45091	4.22943	0.24795	0.518496	no	7.81456
CCR3	CCR3	CCR3	chr3:46283871-46308197	ctrl	dox	OK	0	2.12942	inf	#NAME?	5e-05	0.000758876	yes	7.74108
EDN2	EDN2	EDN2	chr1:41944445-41950344	ctrl	dox	OK	0	2.09645	inf	#NAME?	5e-05	0.000758876	yes	7.71867
PSG11	PSG11	PSG11	chr19:43511808-43530631	ctrl	dox	OK	0	1.86211	inf	#NAME?	5e-05	0.000758876	yes	7.54852
ARHGDIG	ARHGDIG	ARHGDIG	chr16:330605-333003	ctrl	dox	OK	0	1.75229	inf	#NAME?	5e-05	0.000758876	yes	7.46131
TRPV6	TRPV6	TRPV6	chr7:142568955-142583490	ctrl	dox	OK	0	1.67044	inf	#NAME?	5e-05	0.000758876	yes	7.3927
PSG1	PSG1	PSG1	chr19:43370612-43383871	ctrl	dox	OK	0	1.65345	inf	#NAME?	5e-05	0.000758876	yes	7.37803
LY6H	LY6H	LY6H	chr8:144239330-144242053	ctrl	dox	OK	0	1.65044	inf	#NAME?	5e-05	0.000758876	yes	7.37542
LCN1	LCN1	LCN1	chr9:138413283-138418386	ctrl	dox	OK	0	1.6084	inf	#NAME?	5e-05	0.000758876	yes	7.33842
KCNK9	KCNK9	KCNK9	chr8:140613080-140715299	ctrl	dox	OK	0.0687694	12.7091	7.52988	6.53947	0.00035	0.00411812	yes	7.33515
GSDMA	GSDMA	GSDMA	chr17:38119225-38134019	ctrl	dox	OK	0	1.52909	inf	#NAME?	5e-05	0.000758876	yes	7.26593
LILRB2	LILRB2	LILRB2	chr19:54777674-54785033	ctrl	dox	OK	0	1.5207	inf	#NAME?	5e-05	0.000758876	yes	7.25805
TIE1	TIE1	TIE1	chr1:43766565-43788781	ctrl	dox	OK	0.0938501	15.8309	7.39817	5.96438	5e-05	0.000758876	yes	7.25301
ULBP1	ULBP1	ULBP1	chr6:150285142-150294846	ctrl	dox	OK	0.018711	4.21826	7.81662	3.91682	0.0464	0.185466	no	7.20232
TNNI2	TNNI2	TNNI2	chr11:1860232-1862910	ctrl	dox	OK	0	1.44472	inf	#NAME?	5e-05	0.000758876	yes	7.1846
APOA4	APOA4	APOA4	chr11:116691417-116694011	ctrl	dox	OK	0	1.44424	inf	#NAME?	5e-05	0.000758876	yes	7.18412
LSP1	LSP1	LSP1	chr11:1874199-1913493	ctrl	dox	OK	0.0491633	8.41153	7.41864	2.61027	0.0861	0.282	no	7.15324
MT4	MT4	MT4	chr16:56598960-56602869	ctrl	dox	OK	0	1.38758	inf	#NAME?	0.0003	0.00361996	yes	7.12679
GATA5	GATA5	GATA5	chr20:61038552-61051026	ctrl	dox	OK	0	1.38191	inf	#NAME?	5e-05	0.000758876	yes	7.12092
PAK6	PAK6	PAK6	chr15:40453209-40569688	ctrl	dox	OK	0.0223695	4.4689	7.64224	0.750558	0.0024	0.0196498	yes	7.11237
GAL	GAL	GAL	chr11:68451982-68458643	ctrl	dox	OK	0	1.34966	inf	#NAME?	5e-05	0.000758876	yes	7.0871
SERPINH1	SERPINH1	SERPINH1	chr11:75273100-75283849	ctrl	dox	OK	0.0538155	8.48254	7.30033	5.30155	0.00125	0.0116048	yes	7.05615
THEG	THEG	THEG	chr19:362056-376013	ctrl	dox	OK	0	1.2983	inf	#NAME?	5e-05	0.000758876	yes	7.03155
KLK7	KLK7	KLK7	chr19:51479734-51487320	ctrl	dox	OK	0	1.25921	inf	#NAME?	5e-05	0.000758876	yes	6.98779
PSTPIP1	PSTPIP1	PSTPIP1	chr15:77287464-77329671	ctrl	dox	OK	0	1.1681	inf	#NAME?	5e-05	0.000758876	yes	6.88032
RAET1L	RAET1L	RAET1L	chr6:150341265-150346668	ctrl	dox	OK	0	1.15482	inf	#NAME?	5e-05	0.000758876	yes	6.86396
DEFB124	DEFB124	DEFB124	chr20:30053308-30060816	ctrl	dox	OK	0	1.12789	inf	#NAME?	0.01015	0.0605862	no	6.83022
FNDC4	FNDC4	FNDC4	chr2:27714749-27718126	ctrl	dox	OK	0.00888734	2.10973	7.89109	1.46914	0.1404	0.37988	no	6.81032
KRT16P3	KRT16P3	KRT16P3	chr17:20404826-20407811	ctrl	dox	OK	0	1.10732	inf	#NAME?	5e-05	0.000758876	yes	6.8039
KCNH2	KCNH2	KCNH2	chr7:150642043-150675402	ctrl	dox	OK	0.014563	2.6494	7.50721	2.08705	0.11035	0.33105	no	6.75847
TMEM88B	TMEM88B	TMEM88B	chr1:1361507-1363167	ctrl	dox	OK	0	1.06097	inf	#NAME?	5e-05	0.000758876	yes	6.74277
SOX18	SOX18	SOX18	chr20:62679078-62680979	ctrl	dox	OK	0.00972415	2.0892	7.74717	1.54595	0.1404	0.37988	no	6.73373
AQP7P3	AQP7P3	AQP7P3	chr9:42844369-42893137	ctrl	dox	OK	0	1.05159	inf	#NAME?	0.10925	0.329623	no	6.73008
NKAIN4	NKAIN4	NKAIN4	chr20:61872135-61892967	ctrl	dox	OK	0.124055	14.1271	6.83135	6.08787	0.00075	0.007695	yes	6.72052
CA6	CA6	CA6	chr1:9005892-9035148	ctrl	dox	OK	0.0347653	4.64899	7.06313	1.5454	0.24725	0.518496	no	6.70149
PRF1	PRF1	PRF1	chr10:72357103-72362531	ctrl	dox	OK	0.0297102	4.09631	7.10722	3.22259	0.2499	0.519849	no	6.69219
PVRL4	PVRL4	PVRL4	chr1:161040780-161059385	ctrl	dox	OK	0.0423546	5.21943	6.94523	5.26093	0.00285	0.0224536	yes	6.64219
LY6D	LY6D	LY6D	chr8:143866297-143868008	ctrl	dox	OK	0	0.963733	inf	#NAME?	5e-05	0.000758876	yes	6.60545
GABRP	GABRP	GABRP	chr5:170210722-170241050	ctrl	dox	OK	0.00718426	1.65385	7.84678	1.39384	0.2277	0.498762	no	6.59729
TBC1D10C	TBC1D10C	TBC1D10C	chr11:67171383-67177561	ctrl	dox	OK	0	0.953112	inf	#NAME?	5e-05	0.000758876	yes	6.58963
CDHR2	CDHR2	CDHR2	chr5:175969511-176022769	ctrl	dox	OK	0.0165019	2.53967	7.26586	3.31225	0.25055	0.520417	no	6.58807
EPHB3	EPHB3	EPHB3	chr3:184279586-184300196	ctrl	dox	OK	0.836098	79.652	6.57389	10.554	5e-05	0.000758876	yes	6.55692
SATB2	SATB2	SATB2	chr2:200134222-200337481	ctrl	dox	OK	12.7172	1183.9	6.54062	11.6377	5e-05	0.000758876	yes	6.5395
ALPPL2	ALPPL2	ALPPL2	chr2:233271551-233275424	ctrl	dox	OK	0	0.914405	inf	#NAME?	5e-05	0.000758876	yes	6.53045
SNORA36A	SNORA36A	SNORA36A	chrX:153991016-154005964	ctrl	dox	OK	0	0.910148	inf	#NAME?	0.22725	0.498616	no	6.52379
NTF4	NTF4	NTF4	chr19:49564396-49567124	ctrl	dox	OK	0	0.896119	inf	#NAME?	5e-05	0.000758876	yes	6.50163
C1QTNF4	C1QTNF4	C1QTNF4	chr11:47611215-47615961	ctrl	dox	OK	0	0.894961	inf	#NAME?	5e-05	0.000758876	yes	6.49978
NKX2-8	NKX2-8	NKX2-8	chr14:37049215-37051786	ctrl	dox	OK	0	0.888259	inf	#NAME?	5e-05	0.000758876	yes	6.48906
C11orf86	C11orf86	C11orf86	chr11:66742753-66744479	ctrl	dox	OK	0.345357	31.7385	6.52201	6.80136	5e-05	0.000758876	yes	6.48128
SRMS	SRMS	SRMS	chr20:62171276-62178857	ctrl	dox	OK	0	0.869669	inf	#NAME?	5e-05	0.000758876	yes	6.45889
KRT13	KRT13	KRT13	chr17:39657232-39661865	ctrl	dox	OK	0.0213567	2.67873	6.97072	2.24594	0.21425	0.481761	no	6.42201
ODF3L2	ODF3L2	ODF3L2	chr19:463345-474983	ctrl	dox	OK	0	0.845779	inf	#NAME?	5e-05	0.000758876	yes	6.41917
LYPD2	LYPD2	LYPD2	chr8:143831627-143833952	ctrl	dox	OK	0	0.840681	inf	#NAME?	5e-05	0.000758876	yes	6.41055
GALNT9	GALNT9	GALNT9	chr12:132680916-132905905	ctrl	dox	OK	0	0.830919	inf	#NAME?	0.1219	0.35025	no	6.39389
USH1C	USH1C	USH1C	chr11:17515441-17565963	ctrl	dox	OK	0.0505049	5.06439	6.64782	4.81023	0.00075	0.007695	yes	6.39004
KIF19	KIF19	KIF19	chr17:72322350-72351959	ctrl	dox	OK	0	0.81542	inf	#NAME?	5e-05	0.000758876	yes	6.36706
LOXL4	LOXL4	LOXL4	chr10:100007442-100028007	ctrl	dox	OK	0.020226	2.48061	6.93834	3.8104	0.0255	0.121029	no	6.36457
BMP7	BMP7	BMP7	chr20:55743808-55841707	ctrl	dox	OK	0.00404225	1.14387	8.14454	1.60413	0.0792	0.266999	no	6.36056
AQP7	AQP7	AQP7	chr9:33384947-33402517	ctrl	dox	OK	0	0.770751	inf	#NAME?	5e-05	0.000758876	yes	6.28679
MYT1	MYT1	MYT1	chr20:62795826-62873606	ctrl	dox	OK	0.118	9.97741	6.4018	7.30164	5e-05	0.000758876	yes	6.28589
LOC100240735	LOC100240735	LOC100240735	chr12:54452037-54516018	ctrl	dox	OK	0	0.765619	inf	#NAME?	0.1162	0.34165	no	6.27728
HIST1H4I	HIST1H4I	HIST1H4I	chr6:27106071-27114637	ctrl	dox	OK	0	0.750144	inf	#NAME?	0.1256	0.354918	no	6.2482
NTRK1	NTRK1	NTRK1	chr1:156776034-156851642	ctrl	dox	OK	0.0434325	4.03511	6.53769	2.18505	0.0062	0.0410324	yes	6.24232
DUSP27	DUSP27	DUSP27	chr1:167064086-167098402	ctrl	dox	OK	0.03019	2.9985	6.63402	5.18107	0.00115	0.0108276	yes	6.22606
TNF	TNF	TNF	chr6_ssto_hap7:2874144-2876913	ctrl	dox	OK	0	0.737617	inf	#NAME?	5e-05	0.000758876	yes	6.22423
EVPL	EVPL	EVPL	chr17:74002926-74023507	ctrl	dox	OK	0.00255433	0.905082	8.46896	1.78216	0.15555	0.402765	no	6.18764
RBP1	RBP1	RBP1	chr3:139236275-139258671	ctrl	dox	OK	0	0.718811	inf	#NAME?	5e-05	0.000758876	yes	6.18747
TMEM151A	TMEM151A	TMEM151A	chr11:66059372-66064135	ctrl	dox	OK	0	0.714431	inf	#NAME?	5e-05	0.000758876	yes	6.17878
PTGDS	PTGDS	PTGDS	chr9:139871955-139876194	ctrl	dox	OK	0	0.711805	inf	#NAME?	5e-05	0.000758876	yes	6.17354
MZB1	MZB1	MZB1	chr5:138723256-138725605	ctrl	dox	OK	0.0488794	4.17945	6.41794	3.04608	0.24795	0.518496	no	6.15285
VPREB3	VPREB3	VPREB3	chr22:24094929-24096630	ctrl	dox	OK	0	0.689994	inf	#NAME?	5e-05	0.000758876	yes	6.12927
VWA1	VWA1	VWA1	chr1:1370902-1378262	ctrl	dox	OK	0.0362663	3.16395	6.44695	5.50464	0.00015	0.001995	yes	6.10017
HCN4	HCN4	HCN4	chr15:73612199-73661605	ctrl	dox	OK	0	0.669647	inf	#NAME?	5e-05	0.000758876	yes	6.08671
SLC7A10	SLC7A10	SLC7A10	chr19:33685598-33716756	ctrl	dox	OK	0	0.664733	inf	#NAME?	0.12025	0.348296	no	6.07624
AQP7P1	AQP7P1	AQP7P1	chr9:67270214-67289492	ctrl	dox	OK	0.0261717	2.40408	6.52134	4.35648	0.02725	0.126952	no	6.06047
DMBT1	DMBT1	DMBT1	chr10:124320180-124403252	ctrl	dox	OK	0.218199	14.6894	6.07298	5.44005	5e-05	0.000758876	yes	6.00932
SYP-AS1	SYP-AS1	SYP-AS1	chrX:49044264-49058913	ctrl	dox	OK	0	0.626009	inf	#NAME?	0.13145	0.36592	no	5.99098
DNMT3L	DNMT3L	DNMT3L	chr21:45666221-45682099	ctrl	dox	OK	0	0.621734	inf	#NAME?	0.0816	0.271874	no	5.98125
GNG8	GNG8	GNG8	chr19:47137332-47137939	ctrl	dox	OK	0	0.607637	inf	#NAME?	0.05475	0.207042	no	5.94869
MYLK3	MYLK3	MYLK3	chr16:46736193-46782221	ctrl	dox	OK	0.167767	10.4133	5.95583	7.88226	5e-05	0.000758876	yes	5.87368
PRSS8	PRSS8	PRSS8	chr16:31142753-31147151	ctrl	dox	OK	0.0517172	3.60004	6.12123	4.16067	0.00795	0.0498402	yes	5.8702
BGN	BGN	BGN	chrX:152713122-152775004	ctrl	dox	OK	0	0.558894	inf	#NAME?	0.1098	0.330283	no	5.83009
MAFA	MAFA	MAFA	chr8:144510229-144512602	ctrl	dox	OK	0.176761	10.5951	5.90545	6.20071	5e-05	0.000758876	yes	5.82742
ADRA2B	ADRA2B	ADRA2B	chr2:96778622-96781984	ctrl	dox	OK	0.00495135	0.824143	7.37893	1.47444	0.1404	0.37988	no	5.80195
NCR3	NCR3	NCR3	chr6_ssto_hap7:2884757-2891563	ctrl	dox	OK	0	0.546869	inf	#NAME?	0.11905	0.346385	no	5.79927
S100A14	S100A14	S100A14	chr1:153586731-153588808	ctrl	dox	OK	0.0625627	4.02792	6.00859	3.08775	0.051	0.196799	no	5.79824
BPIFB3	BPIFB3	BPIFB3	chr20:31643229-31661434	ctrl	dox	OK	0	0.5422	inf	#NAME?	5e-05	0.000758876	yes	5.78712
GPRIN2	GPRIN2	GPRIN2	chr10:46993545-47000568	ctrl	dox	OK	0	0.540975	inf	#NAME?	5e-05	0.000758876	yes	5.78391
LOC101929427	LOC101929427	LOC101929427	chr11:126293395-126870766	ctrl	dox	OK	0	0.539057	inf	#NAME?	0.11625	0.34165	no	5.77888
CCL22	CCL22	CCL22	chr16:57392694-57400102	ctrl	dox	OK	0	0.539048	inf	#NAME?	5e-05	0.000758876	yes	5.77886
PRR5L	PRR5L	PRR5L	chr11:36317724-36486754	ctrl	dox	OK	0.299923	16.8935	5.81573	7.48136	5e-05	0.000758876	yes	5.76927
CHRNA4	CHRNA4	CHRNA4	chr20:61974661-62002529	ctrl	dox	OK	0	0.533678	inf	#NAME?	5e-05	0.000758876	yes	5.76468
LOC400558	LOC400558	LOC400558	chr16:89232790-89235555	ctrl	dox	OK	0	0.53235	inf	#NAME?	5e-05	0.000758876	yes	5.76115
ITGB4	ITGB4	ITGB4	chr17:73717515-73753899	ctrl	dox	OK	0.108002	6.29853	5.86589	6.94649	5e-05	0.000758876	yes	5.74042
KCNE3	KCNE3	KCNE3	chr11:74165885-74178600	ctrl	dox	OK	0	0.52208	inf	#NAME?	5e-05	0.000758876	yes	5.73357
FRG2B	FRG2B	FRG2B	chr10:135438602-135440299	ctrl	dox	OK	0.109245	6.3015	5.85006	3.90349	0.00795	0.0498402	yes	5.72598
PKP1	PKP1	PKP1	chr1:201252579-201302121	ctrl	dox	OK	0	0.518292	inf	#NAME?	5e-05	0.000758876	yes	5.72326
SMIM22	SMIM22	SMIM22	chr16:4827614-4846492	ctrl	dox	OK	0	0.516685	inf	#NAME?	0.12125	0.349389	no	5.71887
GZMM	GZMM	GZMM	chr19:544033-549920	ctrl	dox	OK	0.201655	11.0857	5.78066	5.4262	0.0001	0.00140493	yes	5.71214
ECSCR	ECSCR	ECSCR	chr5:138784244-138842320	ctrl	dox	OK	1.59957	83.99	5.71446	6.69611	5e-05	0.000758876	yes	5.70564
GDPD2	GDPD2	GDPD2	chrX:69642880-69653241	ctrl	dox	OK	0.0305272	2.08813	6.09597	1.98522	0.09055	0.291576	no	5.69407
SEMA3F	SEMA3F	SEMA3F	chr3:50192847-50226508	ctrl	dox	OK	0.348862	18.5042	5.72905	7.34142	5e-05	0.000758876	yes	5.68906
SLC13A5	SLC13A5	SLC13A5	chr17:6588031-6616740	ctrl	dox	OK	0.387185	20.4439	5.7225	6.38699	5e-05	0.000758876	yes	5.68642
RGS8	RGS8	RGS8	chr1:182615791-182642067	ctrl	dox	OK	0	0.497436	inf	#NAME?	5e-05	0.000758876	yes	5.66515
IFNA4	IFNA4	IFNA4	chr9:21186617-21187598	ctrl	dox	OK	0	0.496448	inf	#NAME?	5e-05	0.000758876	yes	5.66234
CGB	CGB	CGB	chr19:49526125-49527632	ctrl	dox	OK	0	0.495372	inf	#NAME?	5e-05	0.000758876	yes	5.65927
PRSS21	PRSS21	PRSS21	chr16:2867163-2871723	ctrl	dox	OK	0	0.494978	inf	#NAME?	5e-05	0.000758876	yes	5.65815
PDLIM4	PDLIM4	PDLIM4	chr5:131593350-131609147	ctrl	dox	OK	0.0777915	4.41984	5.82824	4.78866	0.0005	0.00552122	yes	5.65703
GATA1	GATA1	GATA1	chrX:48644981-48652717	ctrl	dox	OK	0	0.49457	inf	#NAME?	5e-05	0.000758876	yes	5.65698
HBA1	HBA1	HBA1	chr16:226678-227520	ctrl	dox	OK	0	0.494303	inf	#NAME?	5e-05	0.000758876	yes	5.65622
TMEM59L	TMEM59L	TMEM59L	chr19:18723681-18731849	ctrl	dox	OK	0.0917551	5.09866	5.79619	4.80729	0.002	0.0169467	yes	5.64977
MDFI	MDFI	MDFI	chr6:41606194-41621982	ctrl	dox	OK	0.469563	24.0144	5.67644	6.95978	5e-05	0.000758876	yes	5.64664
ZNF469	ZNF469	ZNF469	chr16:88493878-88507165	ctrl	dox	OK	0.0012916	0.551749	8.73871	1.85451	0.15555	0.402765	no	5.6366
FAM170A	FAM170A	FAM170A	chr5:118965253-118971517	ctrl	dox	OK	0	0.486069	inf	#NAME?	5e-05	0.000758876	yes	5.63247
PDZD3	PDZD3	PDZD3	chr11:119056165-119060932	ctrl	dox	OK	0	0.482924	inf	#NAME?	5e-05	0.000758876	yes	5.62329
PLA2G4D	PLA2G4D	PLA2G4D	chr15:42359880-42386752	ctrl	dox	OK	0.005757	0.765878	7.05565	1.75537	0.17165	0.42469	no	5.62177
CD8A	CD8A	CD8A	chr2:87011727-87035519	ctrl	dox	OK	0	0.48083	inf	#NAME?	5e-05	0.000758876	yes	5.61715
INMT-FAM188B	INMT-FAM188B	INMT-FAM188B	chr7:30791750-30932002	ctrl	dox	OK	0	0.470892	inf	#NAME?	0.10865	0.328419	no	5.58764
GGT1	GGT1	GGT1	chr22:24979717-25024972	ctrl	dox	OK	0.0954362	5.01744	5.71627	4.44285	5e-05	0.000758876	yes	5.57538
VSIG2	VSIG2	VSIG2	chr11:124617369-124622109	ctrl	dox	OK	0	0.466593	inf	#NAME?	5e-05	0.000758876	yes	5.57469
DLL4	DLL4	DLL4	chr15:41221530-41231258	ctrl	dox	OK	0.024588	1.63647	6.05649	3.69901	0.0113	0.0658311	no	5.57296
TGIF2-C20orf24	TGIF2-C20orf24	TGIF2-C20orf24	chr20:35201875-35274619	ctrl	dox	OK	0	0.465602	inf	#NAME?	0.2179	0.48698	no	5.57168
RHOD	RHOD	RHOD	chr11:66824288-66839488	ctrl	dox	OK	0	0.459116	inf	#NAME?	5e-05	0.000758876	yes	5.55187
ICOSLG	ICOSLG	ICOSLG	chr21:45642877-45660887	ctrl	dox	OK	0.086462	4.47064	5.69227	3.94895	5e-05	0.000758876	yes	5.5376
SMCR9	SMCR9	SMCR9	chr17:17322657-17326728	ctrl	dox	OK	0	0.452328	inf	#NAME?	0.0003	0.00361996	yes	5.53084
GPIHBP1	GPIHBP1	GPIHBP1	chr8:144295067-144299044	ctrl	dox	OK	0.0256067	1.62256	5.98561	2.99253	0.0473	0.18756	no	5.51884
C2orf82	C2orf82	C2orf82	chr2:233734993-233741107	ctrl	dox	OK	0.333752	15.5887	5.54558	3.74189	0.0086	0.0530811	no	5.50391
RBBP8NL	RBBP8NL	RBBP8NL	chr20:60985292-61002629	ctrl	dox	OK	0	0.439394	inf	#NAME?	5e-05	0.000758876	yes	5.48991
IP6K3	IP6K3	IP6K3	chr6:33689442-33714762	ctrl	dox	OK	0.00684888	0.744246	6.76377	1.05842	0.21415	0.481596	no	5.48431
C2CD4C	C2CD4C	C2CD4C	chr19:405442-409170	ctrl	dox	OK	0.0286032	1.7044	5.89694	4.5796	0.00975	0.0587257	no	5.47284
CRIP1	CRIP1	CRIP1	chr14:105953256-105955124	ctrl	dox	OK	0.102739	4.99594	5.6037	2.7788	0.24795	0.518496	no	5.47258
MLC1	MLC1	MLC1	chr22:50497819-50524358	ctrl	dox	OK	0.0305611	1.78029	5.86427	3.91798	0.00135	0.0123418	yes	5.46395
LINC01101	LINC01101	LINC01101	chr2:121221910-121223925	ctrl	dox	OK	0	0.42974	inf	#NAME?	5e-05	0.000758876	yes	5.45858
SLC9A9-AS1	SLC9A9-AS1	SLC9A9-AS1	chr3:142984063-143567373	ctrl	dox	OK	0	0.429575	inf	#NAME?	0.1272	0.357891	no	5.45804
WNT6	WNT6	WNT6	chr2:219724545-219738954	ctrl	dox	OK	0.11275	5.37155	5.57413	4.87228	0.0024	0.0196498	yes	5.45423
VIL1	VIL1	VIL1	chr2:219283837-219314248	ctrl	dox	OK	0	0.426177	inf	#NAME?	5e-05	0.000758876	yes	5.44684
EGFL8	EGFL8	EGFL8	chr6_ssto_hap7:3468303-3493616	ctrl	dox	OK	1.90392	83.2875	5.45105	3.65241	0.0353	0.152542	no	5.44367
FLJ16779	FLJ16779	FLJ16779	chr20:61872135-61892967	ctrl	dox	OK	0	0.424747	inf	#NAME?	0.12225	0.350807	no	5.4421
ALS2CL	ALS2CL	ALS2CL	chr3:46710484-46735194	ctrl	dox	OK	0.183204	8.31473	5.50415	5.93562	5e-05	0.000758876	yes	5.42921
TRPV3	TRPV3	TRPV3	chr17:3413795-3461289	ctrl	dox	OK	0.0165006	1.12529	6.09163	3.61373	0.253	0.52154	no	5.42089
AOC1	AOC1	AOC1	chr7:150549564-150558379	ctrl	dox	OK	0.0117505	0.92039	6.29145	1.61244	0.226	0.496979	no	5.41872
PTGIR	PTGIR	PTGIR	chr19:47123724-47128354	ctrl	dox	OK	0	0.417325	inf	#NAME?	5e-05	0.000758876	yes	5.41726
LOC101928292	LOC101928292	LOC101928292	chr11:69300328-69308311	ctrl	dox	OK	0.0838786	3.96916	5.56439	4.73311	5e-05	0.000758876	yes	5.40552
MYO1G	MYO1G	MYO1G	chr7:45002259-45018704	ctrl	dox	OK	0	0.408351	inf	#NAME?	5e-05	0.000758876	yes	5.38664
CRYGC	CRYGC	CRYGC	chr2:208983852-209021486	ctrl	dox	OK	0	0.398139	inf	#NAME?	0.0003	0.00361996	yes	5.35099
DOC2B	DOC2B	DOC2B	chr17:6010-31421	ctrl	dox	OK	0	0.396351	inf	#NAME?	5e-05	0.000758876	yes	5.34465
SLC38A3	SLC38A3	SLC38A3	chr3:50242678-50258411	ctrl	dox	OK	0	0.394631	inf	#NAME?	5e-05	0.000758876	yes	5.33853
ATP12A	ATP12A	ATP12A	chr13:25254548-25285923	ctrl	dox	OK	0	0.394508	inf	#NAME?	5e-05	0.000758876	yes	5.3381
GRAP	GRAP	GRAP	chr17:18853988-18950336	ctrl	dox	OK	0.00962926	0.774228	6.32919	0.653578	0.20225	0.466641	no	5.3202
FTCD	FTCD	FTCD	chr21:47556175-47575481	ctrl	dox	OK	0.0111489	0.832482	6.22245	1.0704	0.22105	0.490297	no	5.31599
C2orf54	C2orf54	C2orf54	chr2:241825464-241835573	ctrl	dox	OK	0.0113032	0.834582	6.20626	0.997855	0.25215	0.521294	no	5.3091
FMOD	FMOD	FMOD	chr1:203309748-203320557	ctrl	dox	OK	0.020069	1.17974	5.87735	2.18786	0.23435	0.505726	no	5.30623
RASL10A	RASL10A	RASL10A	chr22:29708921-29711745	ctrl	dox	OK	0.0429739	2.08588	5.60105	2.85662	0.051	0.196799	no	5.30613
CALCB	CALCB	CALCB	chr11:15095145-15100177	ctrl	dox	OK	0.0893151	3.9168	5.45463	3.50205	0.01845	0.0951378	no	5.3052
SERPINA13P	SERPINA13P	SERPINA13P	chr14:95107061-95113331	ctrl	dox	OK	0	0.38528	inf	#NAME?	5e-05	0.000758876	yes	5.3048
EFS	EFS	EFS	chr14:23825608-23834842	ctrl	dox	OK	0	0.384501	inf	#NAME?	5e-05	0.000758876	yes	5.30196
MAG	MAG	MAG	chr19:35782988-35804709	ctrl	dox	OK	0.00793761	0.696924	6.45615	0.826368	0.2491	0.519448	no	5.3005
CRABP2	CRABP2	CRABP2	chr1:156669399-156675608	ctrl	dox	OK	0.714536	28.5083	5.31823	6.23054	5e-05	0.000758876	yes	5.29869
LTC4S	LTC4S	LTC4S	chr5:179220985-179223513	ctrl	dox	OK	0	0.380049	inf	#NAME?	0.0001	0.00140493	yes	5.28558
PDE6B	PDE6B	PDE6B	chr4:619362-664681	ctrl	dox	OK	0.0548099	2.51708	5.52117	3.56117	0.0694	0.243184	no	5.28511
NKD2	NKD2	NKD2	chr5:1009076-1038927	ctrl	dox	OK	0.00700499	0.651466	6.53916	0.831618	0.2286	0.499952	no	5.28164
KRT16P2	KRT16P2	KRT16P2	chr17:16733796-16736147	ctrl	dox	OK	0	0.378186	inf	#NAME?	5e-05	0.000758876	yes	5.27868
CD247	CD247	CD247	chr1:167399876-167487847	ctrl	dox	OK	0.108367	4.55956	5.3949	4.21373	0.0012	0.0112102	yes	5.27072
OTOF	OTOF	OTOF	chr2:26680070-26781566	ctrl	dox	OK	0	0.373592	inf	#NAME?	5e-05	0.000758876	yes	5.2615
C11orf94	C11orf94	C11orf94	chr11:45928085-45928833	ctrl	dox	OK	0	0.372259	inf	#NAME?	0.01295	0.0730956	no	5.25648
TMEM190	TMEM190	TMEM190	chr19:55888203-55889612	ctrl	dox	OK	0.0421485	1.98276	5.55589	1.55084	0.17165	0.42469	no	5.256
SLURP1	SLURP1	SLURP1	chr8:143822361-143823829	ctrl	dox	OK	0	0.369514	inf	#NAME?	0.0004	0.00458914	yes	5.24608
CD7	CD7	CD7	chr17:80272745-80275480	ctrl	dox	OK	0.016149	0.98152	5.9255	1.41405	0.15555	0.402765	no	5.24481
KRT79	KRT79	KRT79	chr12:53215230-53228077	ctrl	dox	OK	0.306221	11.9761	5.28944	5.93004	5e-05	0.000758876	yes	5.24429
SYP	SYP	SYP	chrX:49044264-49058913	ctrl	dox	OK	1.06554	40.6629	5.25405	7.93722	5e-05	0.000758876	yes	5.24093
C1orf127	C1orf127	C1orf127	chr1:11006529-11042094	ctrl	dox	OK	0	0.368143	inf	#NAME?	5e-05	0.000758876	yes	5.24086
SPDEF	SPDEF	SPDEF	chr6:34505578-34524110	ctrl	dox	OK	0.0154125	0.949417	5.94487	1.52034	0.24255	0.514652	no	5.23855
TBC1D26	TBC1D26	TBC1D26	chr17:15635590-15648098	ctrl	dox	OK	0	0.365857	inf	#NAME?	5e-05	0.000758876	yes	5.23211
MYL3	MYL3	MYL3	chr3:46899356-46904973	ctrl	dox	OK	0	0.365135	inf	#NAME?	5e-05	0.000758876	yes	5.22934
LINC00521	LINC00521	LINC00521	chr14:94463615-94478041	ctrl	dox	OK	0	0.364556	inf	#NAME?	5e-05	0.000758876	yes	5.22711
CRLF1	CRLF1	CRLF1	chr19:18704034-18717660	ctrl	dox	OK	0.458095	17.4442	5.25096	6.8754	5e-05	0.000758876	yes	5.22063
IFNA10	IFNA10	IFNA10	chr9:21206179-21207142	ctrl	dox	OK	0.0295975	1.46161	5.62594	1.72218	0.17165	0.42469	no	5.21584
ADAMTS4	ADAMTS4	ADAMTS4	chr1:161159537-161168845	ctrl	dox	OK	0.12522	4.99412	5.31769	6.28301	5e-05	0.000758876	yes	5.20974
ST14	ST14	ST14	chr11:130029681-130080257	ctrl	dox	OK	0.266466	10.1738	5.25477	5.37335	5e-05	0.000758876	yes	5.20303
SPEG	SPEG	SPEG	chr2:220299699-220358354	ctrl	dox	OK	0.229045	8.79084	5.2623	4.15158	5e-05	0.000758876	yes	5.20229
EPPK1	EPPK1	EPPK1	chr8:144939491-144952632	ctrl	dox	OK	0.0382509	1.76591	5.52878	5.08024	5e-05	0.000758876	yes	5.20186
GPR75-ASB3	GPR75-ASB3	GPR75-ASB3	chr2:53897116-54087170	ctrl	dox	OK	0	0.354159	inf	#NAME?	0.21875	0.487968	no	5.1865
MISP	MISP	MISP	chr19:751145-764318	ctrl	dox	OK	0.147393	5.71251	5.27639	5.98784	5e-05	0.000758876	yes	5.1842
TBX1	TBX1	TBX1	chr22:19744225-19771112	ctrl	dox	OK	0.0135022	0.844247	5.96639	0.889558	0.25175	0.521177	no	5.18379
NYNRIN	NYNRIN	NYNRIN	chr14:24867991-24888494	ctrl	dox	OK	0.00422108	0.506281	6.90618	2.90777	0.25285	0.521454	no	5.18205
PAX4	PAX4	PAX4	chr7:127250345-127255780	ctrl	dox	OK	0	0.352	inf	#NAME?	5e-05	0.000758876	yes	5.17792
KIF1A	KIF1A	KIF1A	chr2:241653180-241759725	ctrl	dox	OK	0.0143973	0.866603	5.9115	4.12671	0.0013	0.0119639	yes	5.16713
SLC30A2	SLC30A2	SLC30A2	chr1:26364513-26372604	ctrl	dox	OK	0.0743967	3.01985	5.34309	3.78832	0.07955	0.267676	no	5.16592
DNASE1L3	DNASE1L3	DNASE1L3	chr3:58178352-58196730	ctrl	dox	OK	0	0.345999	inf	#NAME?	5e-05	0.000758876	yes	5.1538
COL15A1	COL15A1	COL15A1	chr9:101705994-101833074	ctrl	dox	OK	0.330336	12.0745	5.19189	7.63912	5e-05	0.000758876	yes	5.15005
TNNT3	TNNT3	TNNT3	chr11:1940798-1959936	ctrl	dox	OK	0	0.344972	inf	#NAME?	5e-05	0.000758876	yes	5.14963
C15orf56	C15orf56	C15orf56	chr15:40453209-40569688	ctrl	dox	OK	0.0388935	1.70069	5.45044	0.593252	0.15835	0.406168	no	5.12879
ALPP	ALPP	ALPP	chr2:233243347-233247599	ctrl	dox	OK	0	0.337549	inf	#NAME?	5e-05	0.000758876	yes	5.11914
LOC389033	LOC389033	LOC389033	chr2:130680434-130704276	ctrl	dox	OK	0	0.336884	inf	#NAME?	0.12615	0.3558	no	5.11638
PTH2	PTH2	PTH2	chr19:49925670-49926698	ctrl	dox	OK	0	0.329618	inf	#NAME?	0.00635	0.0417482	yes	5.08584
CREB3L3	CREB3L3	CREB3L3	chr19:4153597-4173051	ctrl	dox	OK	0.0604257	2.3811	5.30032	3.61512	0.00025	0.00312152	yes	5.08543
PRSS30P	PRSS30P	PRSS30P	chr16:2889573-2892752	ctrl	dox	OK	0.00652114	0.54223	6.37764	1.51972	0.17165	0.42469	no	5.06288
FUT7	FUT7	FUT7	chr9:139901685-139931234	ctrl	dox	OK	0	0.323706	inf	#NAME?	0.1301	0.363458	no	5.06051
FAM131B	FAM131B	FAM131B	chr7:143050492-143059840	ctrl	dox	OK	0.0656565	2.5043	5.25333	4.05232	0.0615	0.22462	no	5.05455
SPNS2	SPNS2	SPNS2	chr17:4402128-4458681	ctrl	dox	OK	0.146528	5.16883	5.14059	1.53515	0.02595	0.12242	no	5.04813
HSPB7	HSPB7	HSPB7	chr1:16340522-16345285	ctrl	dox	OK	0.00533292	0.49586	6.53886	1.24232	0.1404	0.37988	no	5.04403
TAGLN3	TAGLN3	TAGLN3	chr3:111717585-111732735	ctrl	dox	OK	0.0494555	1.95011	5.30128	1.9228	0.19585	0.457459	no	5.04298
GNLY	GNLY	GNLY	chr2:85921413-85925875	ctrl	dox	OK	0.372776	12.5894	5.07775	4.95604	5e-05	0.000758876	yes	5.04071
SCARF1	SCARF1	SCARF1	chr17:1537151-1549083	ctrl	dox	OK	0.0329052	1.39706	5.40793	2.93369	0.0008	0.00807874	yes	5.03539
EXOC3L2	EXOC3L2	EXOC3L2	chr19:45715878-45737469	ctrl	dox	OK	0.124106	4.37746	5.14045	4.69457	0.0001	0.00140493	yes	5.03194
ZFR2	ZFR2	ZFR2	chr19:3804021-3869027	ctrl	dox	OK	0.00376907	0.440374	6.86838	0.194151	0.25005	0.519876	no	5.03162
ACAN	ACAN	ACAN	chr15:89346673-89418585	ctrl	dox	OK	1.26342	41.1475	5.0254	10.5847	5e-05	0.000758876	yes	5.01438
SLAMF8	SLAMF8	SLAMF8	chr1:159796478-159832447	ctrl	dox	OK	0.0118601	0.692774	5.8682	1.89698	0.2488	0.51902	no	5.00669
RHBG	RHBG	RHBG	chr1:156338979-156355013	ctrl	dox	OK	0.0244532	1.09561	5.48556	1.39617	0.12075	0.348788	no	5.00406
MUC20	MUC20	MUC20	chr3:195447752-195460424	ctrl	dox	OK	0.0350213	1.43062	5.35227	2.49952	0.1707	0.424445	no	4.99994
OR1F1	OR1F1	OR1F1	chr16:3254246-3255185	ctrl	dox	OK	0	0.307736	inf	#NAME?	0.0001	0.00140493	yes	4.98976
IL17B	IL17B	IL17B	chr5:148753829-148758838	ctrl	dox	OK	0.304491	9.9205	5.02594	4.47055	0.00045	0.00505616	yes	4.98078
FIGNL2	FIGNL2	FIGNL2	chr12:52211675-52225701	ctrl	dox	OK	0	0.305452	inf	#NAME?	5e-05	0.000758876	yes	4.97935
IL23A	IL23A	IL23A	chr12:56732662-56734194	ctrl	dox	OK	0.293047	9.5328	5.0237	4.85165	5e-05	0.000758876	yes	4.9768
TNFSF14	TNFSF14	TNFSF14	chr19:6663147-6670599	ctrl	dox	OK	0.0222097	1.00258	5.49638	2.50165	0.2462	0.517698	no	4.9744
PYY	PYY	PYY	chr17:42030106-42081837	ctrl	dox	OK	0	0.303821	inf	#NAME?	5e-05	0.000758876	yes	4.97187
SSTR5	SSTR5	SSTR5	chr16:1114081-1131454	ctrl	dox	OK	0.0188073	0.89353	5.57015	2.4771	0.24155	0.513167	no	4.97107
IL32	IL32	IL32	chr16:3115312-3119668	ctrl	dox	OK	0.233008	7.53135	5.01446	3.12309	5e-05	0.000758876	yes	4.95575
FAM3D	FAM3D	FAM3D	chr3:58619669-58652561	ctrl	dox	OK	0	0.300161	inf	#NAME?	5e-05	0.000758876	yes	4.95495
LBH	LBH	LBH	chr2:30454396-30482899	ctrl	dox	OK	0.726187	22.8101	4.97319	7.14616	5e-05	0.000758876	yes	4.95409
ESPNL	ESPNL	ESPNL	chr2:239008950-239041928	ctrl	dox	OK	0.0184836	0.872317	5.56054	3.76338	0.00795	0.0498402	yes	4.95309
MARVELD3	MARVELD3	MARVELD3	chr16:71660055-71675868	ctrl	dox	OK	0.0140584	0.730338	5.69906	1.2334	0.15725	0.40485	no	4.94357
PDE2A	PDE2A	PDE2A	chr11:72287183-72385497	ctrl	dox	OK	0.160744	5.23338	5.0249	5.93478	5e-05	0.000758876	yes	4.94059
TNFRSF18	TNFRSF18	TNFRSF18	chr1:1138887-1142089	ctrl	dox	OK	0.0669903	2.34315	5.12836	2.01488	0.2515	0.521141	no	4.93377
KRT6A	KRT6A	KRT6A	chr12:52880957-52887181	ctrl	dox	OK	0	0.295572	inf	#NAME?	5e-05	0.000758876	yes	4.93344
CCR7	CCR7	CCR7	chr17:38710021-38721736	ctrl	dox	OK	0.0276896	1.14137	5.36528	2.67195	0.051	0.196799	no	4.93304
IL11	IL11	IL11	chr19:55875749-55881831	ctrl	dox	OK	3.24496	98.8968	4.92965	9.33996	5e-05	0.000758876	yes	4.92536
TRIM53AP	TRIM53AP	TRIM53AP	chr11:89570045-89673722	ctrl	dox	OK	0	0.292924	inf	#NAME?	5e-05	0.000758876	yes	4.92088
DEFB136	DEFB136	DEFB136	chr8:11831445-11832108	ctrl	dox	OK	0	0.291427	inf	#NAME?	0.0768	0.261213	no	4.91374
TBC1D3P2	TBC1D3P2	TBC1D3P2	chr17:60342066-60353016	ctrl	dox	OK	0	0.29136	inf	#NAME?	5e-05	0.000758876	yes	4.91342
LINC00866	LINC00866	LINC00866	chr10:99588234-99609555	ctrl	dox	OK	0	0.290912	inf	#NAME?	0.0064	0.0420461	yes	4.91127
F7	F7	F7	chr13:113760101-113774995	ctrl	dox	OK	0	0.28967	inf	#NAME?	5e-05	0.000758876	yes	4.9053
SHC2	SHC2	SHC2	chr19:416582-460996	ctrl	dox	OK	0.101316	3.32312	5.0356	4.58775	0.00015	0.001995	yes	4.90414
ZNF664-FAM101A	ZNF664-FAM101A	ZNF664-FAM101A	chr12:124457761-124800570	ctrl	dox	OK	0	0.288611	inf	#NAME?	0.17625	0.430847	no	4.9002
PXDN	PXDN	PXDN	chr2:1635658-1748291	ctrl	dox	OK	0	0.287219	inf	#NAME?	5e-05	0.000758876	yes	4.89345
IL34	IL34	IL34	chr16:70613797-70694585	ctrl	dox	OK	0.101386	3.29728	5.02335	4.17386	0.00055	0.00600319	yes	4.89201
IL13	IL13	IL13	chr5:131993864-131996801	ctrl	dox	OK	0	0.286264	inf	#NAME?	5e-05	0.000758876	yes	4.88881
INSM1	INSM1	INSM1	chr20:20348764-20351592	ctrl	dox	OK	0.00863814	0.536891	5.95776	1.64258	0.17165	0.42469	no	4.87492
SLC22A1	SLC22A1	SLC22A1	chr6:160542862-160579750	ctrl	dox	OK	0.0261204	1.044	5.32081	1.98675	0.21005	0.476674	no	4.86692
SERPINA11	SERPINA11	SERPINA11	chr14:94908800-94919122	ctrl	dox	OK	0	0.281674	inf	#NAME?	5e-05	0.000758876	yes	4.86628
HS1BP3-IT1	HS1BP3-IT1	HS1BP3-IT1	chr2:20790534-20792308	ctrl	dox	OK	0.0428995	1.53219	5.15849	1.41576	0.15555	0.402765	no	4.86558
FCRL6	FCRL6	FCRL6	chr1:159770300-159786047	ctrl	dox	OK	0	0.281466	inf	#NAME?	5e-05	0.000758876	yes	4.86526
TMC8	TMC8	TMC8	chr17:76108998-76139049	ctrl	dox	OK	0.0206539	0.882658	5.41737	1.24784	0.17305	0.426391	no	4.86397
GPAT2	GPAT2	GPAT2	chr2:96676298-96700727	ctrl	dox	OK	0.0726337	2.36684	5.02618	2.20745	0.1882	0.447804	no	4.84617
WNT7B	WNT7B	WNT7B	chr22:46316247-46373008	ctrl	dox	OK	0.0192927	0.83142	5.42945	2.57136	0.0519	0.199671	no	4.84421
PSAPL1	PSAPL1	PSAPL1	chr4:7194373-7744564	ctrl	dox	OK	0.00400121	0.391252	6.61152	0.609107	0.24085	0.512468	no	4.84089
GPR132	GPR132	GPR132	chr14:105515725-105531887	ctrl	dox	OK	0.0131749	0.651848	5.62867	1.447	0.1266	0.356789	no	4.83586
ABLIM2	ABLIM2	ABLIM2	chr4:7967036-8160559	ctrl	dox	OK	0.144661	4.38948	4.9233	4.97225	5e-05	0.000758876	yes	4.83015
MRVI1-AS1	MRVI1-AS1	MRVI1-AS1	chr11:10562782-10715535	ctrl	dox	OK	0	0.273744	inf	#NAME?	0.0173	0.0908781	no	4.82652
LRTM2	LRTM2	LRTM2	chr12:1901122-2027870	ctrl	dox	OK	0.00518916	0.419968	6.33863	0.504289	0.0478	0.188585	no	4.82312
CDH15	CDH15	CDH15	chr16:89238162-89261900	ctrl	dox	OK	0.0656951	2.13002	5.01894	4.37091	0.0002	0.00255224	yes	4.82128
C20orf166-AS1	C20orf166-AS1	C20orf166-AS1	chr20:61141437-61167971	ctrl	dox	OK	0	0.272551	inf	#NAME?	5e-05	0.000758876	yes	4.82044
PSG3	PSG3	PSG3	chr19:43225793-43244668	ctrl	dox	OK	0.0218141	0.88837	5.34782	2.31105	0.2488	0.51902	no	4.81957
TTLL10	TTLL10	TTLL10	chr1:1109285-1133313	ctrl	dox	OK	0	0.270139	inf	#NAME?	5e-05	0.000758876	yes	4.80807
CNTFR	CNTFR	CNTFR	chr9:34551429-34590138	ctrl	dox	OK	0.0502678	1.67745	5.06049	2.73211	0.00155	0.0137569	yes	4.80731
EBI3	EBI3	EBI3	chr19:4229539-4237524	ctrl	dox	OK	0.298574	8.59241	4.8469	4.28605	0.00015	0.001995	yes	4.80105
KDR	KDR	KDR	chr4:55944425-55991762	ctrl	dox	OK	1.19875	33.4163	4.80095	9.08667	5e-05	0.000758876	yes	4.7894
GPR142	GPR142	GPR142	chr17:72363644-72368739	ctrl	dox	OK	0	0.265941	inf	#NAME?	5e-05	0.000758876	yes	4.78629
KCNJ11	KCNJ11	KCNJ11	chr11:17406795-17410878	ctrl	dox	OK	0.0712286	2.22732	4.96671	4.16922	5e-05	0.000758876	yes	4.78364
CACNG1	CACNG1	CACNG1	chr17:65040651-65052911	ctrl	dox	OK	0	0.264249	inf	#NAME?	5e-05	0.000758876	yes	4.77741
BAGE5	BAGE5	BAGE5	chr21:11020841-11098937	ctrl	dox	OK	0.015054	0.674379	5.48534	0.793267	0.24765	0.518496	no	4.77168
PRSS22	PRSS22	PRSS22	chr16:2902727-2908171	ctrl	dox	OK	0.110463	3.2466	4.87729	3.5955	0.00285	0.0224536	yes	4.7567
LIMS2	LIMS2	LIMS2	chr2:128395995-128439360	ctrl	dox	OK	0.0497334	1.59878	5.00662	1.85978	0.00255	0.0206147	yes	4.75129
ADRA2C	ADRA2C	ADRA2C	chr4:3768295-3770253	ctrl	dox	OK	0.0339275	1.17188	5.11023	2.53459	0.05985	0.220885	no	4.74982
ETV3L	ETV3L	ETV3L	chr1:157061834-157069600	ctrl	dox	OK	0.011059	0.554451	5.64777	1.44714	0.17165	0.42469	no	4.74434
PDGFB	PDGFB	PDGFB	chr22:39619684-39640957	ctrl	dox	OK	0.135992	3.88888	4.83776	4.46248	5e-05	0.000758876	yes	4.7391
CRB2	CRB2	CRB2	chr9:126118445-126692417	ctrl	dox	OK	0.0285246	1.01506	5.15321	1.30241	0.0347	0.150747	no	4.73378
NOVA2	NOVA2	NOVA2	chr19:46442770-46476657	ctrl	dox	OK	0	0.255596	inf	#NAME?	5e-05	0.000758876	yes	4.73116
OTOS	OTOS	OTOS	chr2:241078445-241080073	ctrl	dox	OK	0.0406304	1.33429	5.03737	1.3298	0.17165	0.42469	no	4.7307
RASGEF1A	RASGEF1A	RASGEF1A	chr10:43689980-43762367	ctrl	dox	OK	0.0913109	2.66931	4.86954	4.56432	5e-05	0.000758876	yes	4.725
KLK11	KLK11	KLK11	chr19:51525486-51531290	ctrl	dox	OK	0	0.25403	inf	#NAME?	5e-05	0.000758876	yes	4.72263
FAM157B	FAM157B	FAM157B	chr9:141106636-141134172	ctrl	dox	OK	0	0.252376	inf	#NAME?	5e-05	0.000758876	yes	4.71356
PRSS56	PRSS56	PRSS56	chr2:233385172-233390425	ctrl	dox	OK	0.00890749	0.482875	5.76049	1.36554	0.17165	0.42469	no	4.70419
ASGR1	ASGR1	ASGR1	chr17:7076750-7082883	ctrl	dox	OK	0.034847	1.15602	5.05199	1.8218	0.1632	0.413644	no	4.70044
FFAR1	FFAR1	FFAR1	chr19:35842444-35843367	ctrl	dox	OK	0	0.249834	inf	#NAME?	0.00065	0.00685708	yes	4.69952
VENTX	VENTX	VENTX	chr10:135051407-135055434	ctrl	dox	OK	0.0142539	0.617203	5.43632	2.12695	0.24545	0.517365	no	4.69264
CACNG4	CACNG4	CACNG4	chr17:64960979-65029518	ctrl	dox	OK	0.00612801	0.403593	6.04134	1.51656	0.17165	0.42469	no	4.68057
CD24	CD24	CD24	chrY:21094584-21438350	ctrl	dox	OK	0.0116055	0.541787	5.54485	0.588519	0.0715	0.24865	no	4.67464
C10orf120	C10orf120	C10orf120	chr10:124457224-124459338	ctrl	dox	OK	0	0.244621	inf	#NAME?	5e-05	0.000758876	yes	4.67028
RAET1K	RAET1K	RAET1K	chr6:150319154-150326280	ctrl	dox	OK	0.248415	6.54052	4.71858	4.93522	5e-05	0.000758876	yes	4.66385
TRIM49B	TRIM49B	TRIM49B	chr11:49053151-49059529	ctrl	dox	OK	0.0138371	0.591219	5.41708	1.16716	0.1404	0.37988	no	4.65661
CES1P2	CES1P2	CES1P2	chr16:55758836-55784123	ctrl	dox	OK	0	0.241834	inf	#NAME?	5e-05	0.000758876	yes	4.6544
ROR2	ROR2	ROR2	chr9:94484877-94712444	ctrl	dox	OK	0.00479173	0.361973	6.23919	1.43757	0.15555	0.402765	no	4.65234
ZNF853	ZNF853	ZNF853	chr7:6655526-6663921	ctrl	dox	OK	0.0337764	1.08753	5.0089	3.9025	0.00145	0.01305	yes	4.64796
TMIE	TMIE	TMIE	chr3:46742822-46752413	ctrl	dox	OK	0.0955913	2.63694	4.78584	4.09639	0.00045	0.00505616	yes	4.64776
PTPN7	PTPN7	PTPN7	chr1:202116140-202130716	ctrl	dox	OK	0.295874	7.65537	4.69342	5.47611	5e-05	0.000758876	yes	4.64735
LCN10	LCN10	LCN10	chr9:139632618-139637411	ctrl	dox	OK	0.0619736	1.79316	4.85471	3.42222	0.0035	0.026261	yes	4.64692
ANO1	ANO1	ANO1	chr11:69924407-70035652	ctrl	dox	OK	0.0242249	0.844523	5.12357	2.96797	0.0021	0.0176772	yes	4.642
PDZD7	PDZD7	PDZD7	chr10:102756863-102790914	ctrl	dox	OK	0.313251	8.05076	4.68373	1.79566	0.00225	0.0185998	yes	4.64019
TBC1D28	TBC1D28	TBC1D28	chr17:18538841-18547740	ctrl	dox	OK	0	0.238969	inf	#NAME?	5e-05	0.000758876	yes	4.63789
SSTR3	SSTR3	SSTR3	chr22:37600276-37608416	ctrl	dox	OK	0	0.23878	inf	#NAME?	5e-05	0.000758876	yes	4.6368
NFATC4	NFATC4	NFATC4	chr14:24836116-24848811	ctrl	dox	OK	0.0643204	1.834	4.83357	4.27698	5e-05	0.000758876	yes	4.63294
SELM	SELM	SELM	chr22:31500762-31503551	ctrl	dox	OK	0.500549	12.6314	4.65737	4.45649	5e-05	0.000758876	yes	4.62996
C1orf61	C1orf61	C1orf61	chr1:156374054-156399184	ctrl	dox	OK	0.128204	3.40742	4.73217	3.02435	0.0092	0.0561475	no	4.62804
GP1BB	GP1BB	GP1BB	chr22:19701986-19712297	ctrl	dox	OK	0.184582	4.79852	4.70026	1.42675	0.26045	0.530202	no	4.62714
CST1	CST1	CST1	chr20:23728189-23731574	ctrl	dox	OK	0.313299	7.90775	4.65766	3.39053	0.00105	0.0100871	yes	4.61415
SLC6A3	SLC6A3	SLC6A3	chr5:1392904-1445543	ctrl	dox	OK	0	0.234473	inf	#NAME?	5e-05	0.000758876	yes	4.6116
ATP2B3	ATP2B3	ATP2B3	chrX:152801579-152848387	ctrl	dox	OK	0	0.234381	inf	#NAME?	5e-05	0.000758876	yes	4.61106
CORO2B	CORO2B	CORO2B	chr15:68871307-69020144	ctrl	dox	OK	0.140472	3.66211	4.70432	4.83876	5e-05	0.000758876	yes	4.60904
C1orf234	C1orf234	C1orf234	chr1:23337326-23342343	ctrl	dox	OK	0	0.23307	inf	#NAME?	0.0197	0.0999473	no	4.6033
NPTX1	NPTX1	NPTX1	chr17:78440632-78450404	ctrl	dox	OK	0.044098	1.29502	4.87612	4.61224	5e-05	0.000758876	yes	4.59235
CCDC172	CCDC172	CCDC172	chr10:118083939-118139541	ctrl	dox	OK	0.0317878	0.996969	4.971	2.70489	0.1237	0.352657	no	4.59079
FAM167A	FAM167A	FAM167A	chr8:11197145-11324276	ctrl	dox	OK	0.237105	5.94322	4.64765	5.5567	5e-05	0.000758876	yes	4.59047
ARL17B	ARL17B	ARL17B	chr17_ctg5_hap1:195720-462618	ctrl	dox	OK	0	0.230639	inf	#NAME?	0.07085	0.246964	no	4.5888
IGLL5	IGLL5	IGLL5	chr22:23229959-23238013	ctrl	dox	OK	0	0.229194	inf	#NAME?	5e-05	0.000758876	yes	4.58011
RASL12	RASL12	RASL12	chr15:65337707-65360388	ctrl	dox	OK	0.157925	3.99507	4.66091	4.6244	5e-05	0.000758876	yes	4.57594
NACAD	NACAD	NACAD	chr7:45120035-45128493	ctrl	dox	OK	0.0211284	0.729008	5.10868	4.00586	0.00445	0.0315311	yes	4.56929
KRT86	KRT86	KRT86	chr12:52695648-52702947	ctrl	dox	OK	4.23309	100.414	4.5681	9.42708	5e-05	0.000758876	yes	4.56485
COBL	COBL	COBL	chr7:51083908-51384515	ctrl	dox	OK	0.0145075	0.569767	5.2955	2.2897	0.1448	0.386945	no	4.56418
KRTAP5-AS1	KRTAP5-AS1	KRTAP5-AS1	chr11:1593970-1620414	ctrl	dox	OK	0.00791058	0.412807	5.70554	1.28082	0.17765	0.433031	no	4.56112
SYT12	SYT12	SYT12	chr11:66790189-66818334	ctrl	dox	OK	0.0191951	0.675579	5.13732	2.74767	0.0086	0.0530811	no	4.55352
EFCAB12	EFCAB12	EFCAB12	chr3:129120163-129147494	ctrl	dox	OK	0	0.224251	inf	#NAME?	5e-05	0.000758876	yes	4.54998
OPRL1	OPRL1	OPRL1	chr20:62711470-62731996	ctrl	dox	OK	0.625473	14.8116	4.56563	6.5037	5e-05	0.000758876	yes	4.54373
BSND	BSND	BSND	chr1:55464616-55474465	ctrl	dox	OK	0	0.22302	inf	#NAME?	5e-05	0.000758876	yes	4.54238
CHGA	CHGA	CHGA	chr14:93389444-93401638	ctrl	dox	OK	0.0487824	1.35847	4.79947	3.64341	0.00445	0.0315311	yes	4.54104
DES	DES	DES	chr2:220283098-220291461	ctrl	dox	OK	0.0717178	1.88485	4.71598	3.94637	0.0008	0.00807874	yes	4.53529
BHLHA15	BHLHA15	BHLHA15	chr7:97841565-97842271	ctrl	dox	OK	0.20924	5.05251	4.59377	3.6563	0.00215	0.0179634	yes	4.52927
SLC1A7	SLC1A7	SLC1A7	chr1:53552850-53608304	ctrl	dox	OK	0.00797923	0.404691	5.66443	0.467032	0.23115	0.502336	no	4.52763
LOC100130872	LOC100130872,SPON2	LOC100130872,SPON2	chr4:1160720-1202750	ctrl	dox	OK	0.00503493	0.336635	6.06307	0.142452	0.2562	0.525122	no	4.52703
MICALCL	MICALCL	MICALCL	chr11:12308446-12380691	ctrl	dox	OK	0.0524638	1.42678	4.7653	3.96044	0.0008	0.00807874	yes	4.52368
RGCC	RGCC	RGCC	chr13:42031541-42045013	ctrl	dox	OK	0.42043	9.81537	4.54511	4.2714	5e-05	0.000758876	yes	4.51266
LYVE1	LYVE1	LYVE1	chr11:10562782-10715535	ctrl	dox	OK	0	0.217494	inf	#NAME?	0.2263	0.497273	no	4.50776
OTOG	OTOG	OTOG	chr11:17568919-17667491	ctrl	dox	OK	0	0.217164	inf	#NAME?	5e-05	0.000758876	yes	4.50566
RORC	RORC	RORC	chr1:151778546-151804348	ctrl	dox	OK	0.0882713	2.21943	4.6521	4.51944	5e-05	0.000758876	yes	4.50376
NKX6-2	NKX6-2	NKX6-2	chr10:134598319-134599537	ctrl	dox	OK	0	0.216573	inf	#NAME?	5e-05	0.000758876	yes	4.5019
LOC338963	LOC338963	LOC338963	chr15:83379222-83382745	ctrl	dox	OK	0.0157057	0.569917	5.18139	1.26047	0.15555	0.402765	no	4.49569
SPRR2D	SPRR2D	SPRR2D	chr1:153012200-153013594	ctrl	dox	OK	0.0305707	0.905076	4.88781	1.12372	0.1404	0.37988	no	4.49538
LINC00494	LINC00494	LINC00494	chr20:46988653-46999381	ctrl	dox	OK	0.0325313	0.947442	4.86414	3.58866	0.00425	0.0304504	yes	4.49259
TCEAL2	TCEAL2	TCEAL2	chrX:101380659-101382684	ctrl	dox	OK	0.101405	2.49116	4.61862	3.01989	0.0073	0.0466945	yes	4.48871
AQP5	AQP5	AQP5	chr12:50344523-50359465	ctrl	dox	OK	0.130734	3.14944	4.59038	4.03028	0.0001	0.00140493	yes	4.48863
GNAT1	GNAT1	GNAT1	chr3:50229042-50235129	ctrl	dox	OK	0	0.214207	inf	#NAME?	5e-05	0.000758876	yes	4.48676
CD19	CD19	CD19	chr16:28943259-28950668	ctrl	dox	OK	0	0.214179	inf	#NAME?	5e-05	0.000758876	yes	4.48658
CRYAA	CRYAA	CRYAA	chr21:44589117-44592920	ctrl	dox	OK	0	0.213752	inf	#NAME?	5e-05	0.000758876	yes	4.48383
C1orf64	C1orf64	C1orf64	chr1:16330730-16333184	ctrl	dox	OK	0	0.213339	inf	#NAME?	0.0002	0.00255224	yes	4.48116
OR5AU1	OR5AU1	OR5AU1	chr14:21623095-21624184	ctrl	dox	OK	0	0.212397	inf	#NAME?	0.00085	0.00846464	yes	4.47507
ARC	ARC	ARC	chr8:143692404-143695833	ctrl	dox	OK	0.357225	8.11944	4.50648	5.77966	5e-05	0.000758876	yes	4.46842
CRYBB1	CRYBB1	CRYBB1	chr22:26995361-27013991	ctrl	dox	OK	0	0.210998	inf	#NAME?	0.00105	0.0100871	yes	4.46596
MPZ	MPZ	MPZ	chr1:161274524-161279762	ctrl	dox	OK	8.80027	193.348	4.45751	10.2914	5e-05	0.000758876	yes	4.45594
PRKCG	PRKCG	PRKCG	chr19:54385466-54410901	ctrl	dox	OK	0.0266717	0.789865	4.88823	2.66959	0.0215	0.106492	no	4.44702
BAI1	BAI1	BAI1	chr8:143545376-143626368	ctrl	dox	OK	0.0354766	0.980818	4.78904	3.8757	0.0004	0.00458914	yes	4.44542
CLDN19	CLDN19	CLDN19	chr1:43198763-43205925	ctrl	dox	OK	0	0.207585	inf	#NAME?	5e-05	0.000758876	yes	4.44351
IGFBP4	IGFBP4	IGFBP4	chr17:38599675-38613982	ctrl	dox	OK	0.301552	6.7514	4.48471	4.35322	5e-05	0.000758876	yes	4.43978
CNBD2	CNBD2	CNBD2	chr20:34556528-34618622	ctrl	dox	OK	0	0.205991	inf	#NAME?	5e-05	0.000758876	yes	4.4329
CNPY1	CNPY1	CNPY1	chr7:155293952-155326539	ctrl	dox	OK	0	0.205627	inf	#NAME?	5e-05	0.000758876	yes	4.43047
MYL4	MYL4	MYL4	chr17:45286427-45301045	ctrl	dox	OK	0.163664	3.73077	4.51066	3.03407	0.0009	0.00885452	yes	4.42896
C20orf173	C20orf173	C20orf173	chr20:34108569-34117481	ctrl	dox	OK	0	0.20509	inf	#NAME?	0.11245	0.335166	no	4.42687
ANKRD65	ANKRD65	ANKRD65	chr1:1353799-1356824	ctrl	dox	OK	0	0.204971	inf	#NAME?	5e-05	0.000758876	yes	4.42607
PPP2R2C	PPP2R2C	PPP2R2C	chr4:6322304-6565327	ctrl	dox	OK	0.0101916	0.419485	5.36317	1.30239	0.118	0.344671	no	4.41078
TAGLN	TAGLN	TAGLN	chr11:117049938-117075508	ctrl	dox	OK	0.663043	14.3047	4.43124	2.62032	0.0285	0.130407	no	4.41065
ST6GALNAC1	ST6GALNAC1	ST6GALNAC1	chr17:74620837-74639920	ctrl	dox	OK	0.349892	7.5966	4.44037	5.34936	5e-05	0.000758876	yes	4.40162
CD79A	CD79A	CD79A	chr19:42381189-42385439	ctrl	dox	OK	0.0604164	1.47802	4.61258	2.20041	0.1506	0.395846	no	4.40134
PPP1R16B	PPP1R16B	PPP1R16B	chr20:37434347-37551667	ctrl	dox	OK	0.0429111	1.10755	4.68988	4.11992	5e-05	0.000758876	yes	4.40063
GREB1L	GREB1L	GREB1L	chr18:18822202-19102791	ctrl	dox	OK	0.00318215	0.268046	6.39633	1.45231	0.15555	0.402765	no	4.39867
CAMSAP3	CAMSAP3	CAMSAP3	chr19:7660787-7683196	ctrl	dox	OK	0.0261144	0.748996	4.84204	3.15345	0.00135	0.0123418	yes	4.39345
SCARA3	SCARA3	SCARA3	chr8:27491576-27534286	ctrl	dox	OK	0.00966758	0.403334	5.38268	0.94158	0.2268	0.497945	no	4.39342
KIR2DL1	KIR2DL1	KIR2DL1	chr19:55280873-55295778	ctrl	dox	OK	0	0.199351	inf	#NAME?	0.0007	0.00729454	yes	4.38785
ZNF556	ZNF556	ZNF556	chr19:2867332-2878501	ctrl	dox	OK	0.0634946	1.52238	4.58355	3.01944	0.0122	0.0699397	no	4.38199
PROM2	PROM2	PROM2	chr2:95940200-95957055	ctrl	dox	OK	0.0576815	1.39853	4.59966	3.62459	5e-05	0.000758876	yes	4.37928
GALNT6	GALNT6	GALNT6	chr12:51745832-51909547	ctrl	dox	OK	0.386827	8.22172	4.40968	2.76438	0.0255	0.121029	no	4.37461
DHH	DHH	DHH	chr12:49483205-49488602	ctrl	dox	OK	0.153965	3.34562	4.4416	4.17445	5e-05	0.000758876	yes	4.35512
FAM25BP	FAM25BP	FAM25BP	chr10:47740303-47744822	ctrl	dox	OK	0	0.193483	inf	#NAME?	0.05475	0.207042	no	4.34684
SCUBE3	SCUBE3	SCUBE3	chr6:35182189-35218609	ctrl	dox	OK	0.770703	15.8611	4.36318	7.32942	5e-05	0.000758876	yes	4.34548
ZNF488	ZNF488	ZNF488	chr10:48355088-48373866	ctrl	dox	OK	0.441405	9.16205	4.3755	5.79545	5e-05	0.000758876	yes	4.34475
GPR97	GPR97	GPR97	chr16:57702156-57723290	ctrl	dox	OK	0.0247091	0.694023	4.81187	2.55965	0.0461	0.184967	no	4.34224
MSLN	MSLN	MSLN	chr16:810764-818865	ctrl	dox	OK	0.00708059	0.336099	5.56887	0.579635	0.2484	0.518832	no	4.34076
FAM90A25P	FAM90A25P	FAM90A25P	chr8:12272029-12275541	ctrl	dox	OK	0.0185638	0.568033	4.93541	2.19837	0.24795	0.518496	no	4.33889
TMX2-CTNND1	TMX2-CTNND1	TMX2-CTNND1	chr11:57479994-57586652	ctrl	dox	OK	0	0.191582	inf	#NAME?	0.153	0.399871	no	4.33329
CARNS1	CARNS1	CARNS1	chr11:67183148-67193078	ctrl	dox	OK	0.033308	0.862831	4.69514	2.94443	0.2419	0.513516	no	4.333
PSG5	PSG5	PSG5	chr19:43671894-43690688	ctrl	dox	OK	0.0406839	1.01089	4.63502	1.85787	0.24305	0.515348	no	4.33216
FAM107A	FAM107A	FAM107A	chr3:58549838-58613337	ctrl	dox	OK	0.0374992	0.94664	4.65789	2.62136	0.0001	0.00140493	yes	4.332
CACNA1I	CACNA1I	CACNA1I	chr22:39966757-40085740	ctrl	dox	OK	0.0141753	0.475988	5.06947	4.03967	0.0003	0.00361996	yes	4.32931
LOC101928416	LOC101928416	LOC101928416	chr12:132906435-132908161	ctrl	dox	OK	0	0.189955	inf	#NAME?	0.0062	0.0410324	yes	4.3216
GABBR2	GABBR2	GABBR2	chr9:101050363-101471479	ctrl	dox	OK	0.0123492	0.43575	5.14101	2.76189	0.03515	0.15226	no	4.31794
LOC102723854	LOC102723854	LOC102723854	chr2:43254991-43266682	ctrl	dox	OK	0.00947779	0.378052	5.31789	1.29728	0.17165	0.42469	no	4.31635
GNGT1	GNGT1	GNGT1	chr7:93535819-93540485	ctrl	dox	OK	0	0.188616	inf	#NAME?	0.0267	0.124908	no	4.31191
CMTM5	CMTM5	CMTM5	chr14:23846016-23848981	ctrl	dox	OK	0.6157	12.3253	4.32325	4.61557	5e-05	0.000758876	yes	4.30118
KLK10	KLK10	KLK10	chr19:51515999-51523431	ctrl	dox	OK	0	0.18698	inf	#NAME?	5e-05	0.000758876	yes	4.29998
TMEM8C	TMEM8C	TMEM8C	chr9:136379707-136390068	ctrl	dox	OK	0	0.185815	inf	#NAME?	0.00395	0.0287717	yes	4.29142
PALM	PALM	PALM	chr19:708952-748330	ctrl	dox	OK	0.0128104	0.436129	5.08937	1.74135	0.2069	0.472146	no	4.2897
SLC51B	SLC51B	SLC51B	chr15:65337707-65360388	ctrl	dox	OK	0.0221686	0.61592	4.79615	0.816929	0.24425	0.516412	no	4.28225
OBP2B	OBP2B	OBP2B	chr9:136080665-136084637	ctrl	dox	OK	0	0.184478	inf	#NAME?	5e-05	0.000758876	yes	4.28154
BHLHE23	BHLHE23	BHLHE23	chr20:61637330-61638387	ctrl	dox	OK	0	0.184053	inf	#NAME?	0.0001	0.00140493	yes	4.27838
LRRC75B	LRRC75B	LRRC75B	chr22:24979717-25024972	ctrl	dox	OK	0.0400096	0.95858	4.58248	1.49722	0.30795	0.5835	no	4.27559
SPDYE8P	SPDYE8P	SPDYE8P	chr7:74601103-74988276	ctrl	dox	OK	0	0.183618	inf	#NAME?	0.11545	0.340043	no	4.27514
POU3F1	POU3F1	POU3F1	chr1:38509522-38512450	ctrl	dox	OK	0.244387	4.9119	4.32904	5.24092	5e-05	0.000758876	yes	4.27412
TTTY19	TTTY19	TTTY19	chrY:8572512-8573324	ctrl	dox	OK	0	0.183478	inf	#NAME?	0.0768	0.261213	no	4.2741
NOS3	NOS3	NOS3	chr7:150688143-150721586	ctrl	dox	OK	0.0171275	0.513507	4.906	1.16833	0.0048	0.0335086	yes	4.27038
ZG16B	ZG16B	ZG16B	chr16:2880172-2882285	ctrl	dox	OK	0.482699	9.4561	4.29205	3.96883	0.00015	0.001995	yes	4.26399
LINC00905	LINC00905	LINC00905	chr19:16144522-16152945	ctrl	dox	OK	0	0.181926	inf	#NAME?	0.0617	0.225076	no	4.26248
CEACAM21	CEACAM21	CEACAM21	chr19:42055885-42093197	ctrl	dox	OK	0	0.181587	inf	#NAME?	5e-05	0.000758876	yes	4.25993
HNF4A	HNF4A	HNF4A	chr20:42984440-43061485	ctrl	dox	OK	0	0.181476	inf	#NAME?	5e-05	0.000758876	yes	4.25909
PTAFR	PTAFR	PTAFR	chr1:28473676-28520447	ctrl	dox	OK	0.124598	2.56676	4.3646	4.617	5e-05	0.000758876	yes	4.25883
SBSN	SBSN	SBSN	chr19:36014268-36019253	ctrl	dox	OK	0.0526523	1.18205	4.48865	1.42222	0.1978	0.460277	no	4.24993
LOC101927718	LOC101927718	LOC101927718	chr18:28898051-29006951	ctrl	dox	OK	0	0.178891	inf	#NAME?	0.2283	0.499528	no	4.23948
B3GNT7	B3GNT7	B3GNT7	chr2:232260334-232265875	ctrl	dox	OK	2.23802	42.3302	4.24139	8.39017	5e-05	0.000758876	yes	4.2353
PRM3	PRM3	PRM3	chr16:11367055-11367452	ctrl	dox	OK	0	0.177321	inf	#NAME?	0.0278	0.128316	no	4.22744
AGBL5-AS1	AGBL5-AS1	AGBL5-AS1	chr2:27272550-27273132	ctrl	dox	OK	0	0.176735	inf	#NAME?	0.0326	0.143923	no	4.22292
KCND3-IT1	KCND3-IT1	KCND3-IT1	chr1:112318453-112531777	ctrl	dox	OK	0	0.176393	inf	#NAME?	0.2064	0.47167	no	4.22028
LOC100129697	LOC100129697	LOC100129697	chr16:88941262-89043504	ctrl	dox	OK	0	0.176201	inf	#NAME?	0.1594	0.40787	no	4.21879
CALCA	CALCA	CALCA	chr11:14988214-14993832	ctrl	dox	OK	0	0.176033	inf	#NAME?	0.0645	0.231851	no	4.21749
KRTAP22-2	KRTAP22-2	KRTAP22-2	chr21:31962423-31962716	ctrl	dox	OK	0	0.17426	inf	#NAME?	0.0787	0.265712	no	4.20367
LOC286297	LOC286297	LOC286297	chr9:67017374-67032072	ctrl	dox	OK	0.0210718	0.56246	4.73837	2.55424	0.1421	0.382119	no	4.2035
CLCNKA	CLCNKA	CLCNKA	chr1:16348485-16360545	ctrl	dox	OK	0	0.173806	inf	#NAME?	5e-05	0.000758876	yes	4.20011
PLA2G5	PLA2G5	PLA2G5	chr1:20396700-20418394	ctrl	dox	OK	0.0572382	1.22511	4.41979	2.65353	0.01135	0.066101	no	4.19921
AQP1	AQP1	AQP1	chr7:30951414-30965131	ctrl	dox	OK	1.54569	28.5444	4.20688	6.25456	5e-05	0.000758876	yes	4.19809
CGB7	CGB7	CGB7	chr19:49557530-49558997	ctrl	dox	OK	0	0.172727	inf	#NAME?	0.00165	0.0145011	yes	4.19162
KCNF1	KCNF1	KCNF1	chr2:11052062-11054351	ctrl	dox	OK	0	0.172581	inf	#NAME?	5e-05	0.000758876	yes	4.19046
GM140	GM140	GM140	chr1:181205523-181207740	ctrl	dox	OK	0	0.171769	inf	#NAME?	0.0716	0.24895	no	4.18403
IFNA17	IFNA17	IFNA17	chr9:21227241-21228221	ctrl	dox	OK	0	0.171759	inf	#NAME?	0.00255	0.0206147	yes	4.18395
CGB8	CGB8	CGB8	chr19:49550894-49552368	ctrl	dox	OK	0.0270462	0.663184	4.61591	1.24338	0.17165	0.42469	no	4.1836
MDK	MDK	MDK	chr11:46402333-46405387	ctrl	dox	OK	3.055	55.6743	4.18777	6.38365	5e-05	0.000758876	yes	4.18331
PRDM12	PRDM12	PRDM12	chr9:133539980-133558384	ctrl	dox	OK	0.0184718	0.503212	4.76777	1.83708	0.09	0.290586	no	4.17195
LHX5	LHX5	LHX5	chr12:113900693-113909877	ctrl	dox	OK	0	0.170146	inf	#NAME?	5e-05	0.000758876	yes	4.17109
TRABD2B	TRABD2B	TRABD2B	chr1:48226199-48462562	ctrl	dox	OK	0.0474157	1.02248	4.43057	4.46613	5e-05	0.000758876	yes	4.16852
KLK6	KLK6	KLK6	chr19:51461886-51472929	ctrl	dox	OK	1.26108	22.8375	4.17867	5.86277	5e-05	0.000758876	yes	4.16791
HS3ST6	HS3ST6	HS3ST6	chr16:1961464-1968231	ctrl	dox	OK	0	0.169427	inf	#NAME?	0.00055	0.00600319	yes	4.16533
LINC00160	LINC00160	LINC00160	chr21:36096104-36109479	ctrl	dox	OK	0	0.169404	inf	#NAME?	0.00645	0.0422355	yes	4.16514
SLC4A1	SLC4A1	SLC4A1	chr17:42325757-42345502	ctrl	dox	OK	0	0.169404	inf	#NAME?	5e-05	0.000758876	yes	4.16514
LINC00323	LINC00323	LINC00323	chr21:42513426-42519991	ctrl	dox	OK	0	0.169273	inf	#NAME?	5e-05	0.000758876	yes	4.16409
KLK5	KLK5	KLK5	chr19:51446558-51456344	ctrl	dox	OK	0.0271145	0.652265	4.58832	1.14071	0.25035	0.520138	no	4.15735
SCD5	SCD5	SCD5	chr4:83550689-83720010	ctrl	dox	OK	0.374383	6.83799	4.19098	4.80867	5e-05	0.000758876	yes	4.15506
OXT	OXT	OXT	chr20:3052265-3053163	ctrl	dox	OK	0	0.167701	inf	#NAME?	0.01015	0.0605862	no	4.15138
CYP11A1	CYP11A1	CYP11A1	chr15:74630102-74660081	ctrl	dox	OK	0.115411	2.21469	4.26226	3.46963	0.0004	0.00458914	yes	4.14887
OR7E47P	OR7E47P	OR7E47P	chr12:52473479-52502103	ctrl	dox	OK	0	0.166163	inf	#NAME?	0.00015	0.001995	yes	4.13884
TMEM63C	TMEM63C	TMEM63C	chr14:77648101-77725838	ctrl	dox	OK	0	0.166129	inf	#NAME?	5e-05	0.000758876	yes	4.13856
INMT	INMT	INMT	chr7:30791750-30932002	ctrl	dox	OK	9.4884	166.856	4.13629	8.51264	5e-05	0.000758876	yes	4.13486
FZD8	FZD8	FZD8	chr10:35927176-35930362	ctrl	dox	OK	0	0.165599	inf	#NAME?	5e-05	0.000758876	yes	4.13421
TUBA4B	TUBA4B	TUBA4B	chr2:220110191-220136910	ctrl	dox	OK	0	0.165328	inf	#NAME?	0.11275	0.335837	no	4.13198
JPH3	JPH3	JPH3	chr16:87635440-87731761	ctrl	dox	OK	0.0914858	1.76662	4.2713	2.75102	5e-05	0.000758876	yes	4.12979
NEU4	NEU4	NEU4	chr2:242750159-242758739	ctrl	dox	OK	0.343476	6.17579	4.16834	3.26937	0.0612	0.224071	no	4.12927
SEPT5-GP1BB	SEPT5-GP1BB	SEPT5-GP1BB	chr22:19701986-19712297	ctrl	dox	OK	0.896404	15.816	4.14109	5.59959	5e-05	0.000758876	yes	4.126
FAM157A	FAM157A	FAM157A	chr3:197879236-197907728	ctrl	dox	OK	0	0.164366	inf	#NAME?	5e-05	0.000758876	yes	4.12405
SLC16A3	SLC16A3	SLC16A3	chr17:80186281-80197375	ctrl	dox	OK	10.456	182.399	4.12469	9.77442	5e-05	0.000758876	yes	4.12339
AATK	AATK	AATK	chr17:79008946-79156964	ctrl	dox	OK	0.550628	9.72174	4.14206	3.90741	5e-05	0.000758876	yes	4.11758
LCN6	LCN6	LCN6	chr9:139638468-139644363	ctrl	dox	OK	0	0.163099	inf	#NAME?	0.00765	0.0485699	yes	4.11353
MAGOH2	MAGOH2	MAGOH2	chr17:10616638-10718481	ctrl	dox	OK	0	0.162465	inf	#NAME?	0.22785	0.498969	no	4.10823
SERPINA4	SERPINA4	SERPINA4	chr14:95027756-95036250	ctrl	dox	OK	0	0.162093	inf	#NAME?	5e-05	0.000758876	yes	4.10512
TMPRSS2	TMPRSS2	TMPRSS2	chr21:42836477-42880085	ctrl	dox	OK	0.154025	2.81205	4.19039	4.33786	5e-05	0.000758876	yes	4.10476
FAAH	FAAH	FAAH	chr1:46859938-46879520	ctrl	dox	OK	0.130318	2.39017	4.19701	3.97661	0.0001	0.00140493	yes	4.09636
NKD1	NKD1	NKD1	chr16:50582240-50674771	ctrl	dox	OK	0.00946302	0.321423	5.08603	3.25984	0.0216	0.106751	no	4.08987
GPX7	GPX7	GPX7	chr1:53068042-53074723	ctrl	dox	OK	0.0526609	1.05549	4.32503	2.07073	0.0026	0.0209435	yes	4.08781
SCNN1A	SCNN1A	SCNN1A	chr12:6456008-6500737	ctrl	dox	OK	0.0295017	0.660509	4.48471	0.515805	0.06615	0.2358	no	4.08527
FBP1	FBP1	FBP1	chr9:97365420-97402531	ctrl	dox	OK	0	0.159373	inf	#NAME?	5e-05	0.000758876	yes	4.08213
SPATA31A6	SPATA31A6	SPATA31A6	chr9:43624501-43630730	ctrl	dox	OK	0.0326617	0.712247	4.44671	3.64887	0.00065	0.00685708	yes	4.08148
SEZ6L	SEZ6L	SEZ6L	chr22:26565439-26779563	ctrl	dox	OK	0	0.159116	inf	#NAME?	5e-05	0.000758876	yes	4.07994
CD52	CD52	CD52	chr1:26608772-26647014	ctrl	dox	OK	0.168344	3.00132	4.15611	0.935226	0.16635	0.417853	no	4.07766
TMEM213	TMEM213	TMEM213	chr7:138391038-138490769	ctrl	dox	OK	0.0123756	0.367393	4.89175	0.551284	0.1936	0.454746	no	4.07607
DPYSL4	DPYSL4	DPYSL4	chr10:134000413-134019280	ctrl	dox	OK	0.0068666	0.272474	5.31038	1.23127	0.17165	0.42469	no	4.06588
LINC01107	LINC01107	LINC01107	chr2:239419330-239464140	ctrl	dox	OK	0	0.157099	inf	#NAME?	5e-05	0.000758876	yes	4.06263
C20orf195	C20orf195	C20orf195	chr20:62184372-62188035	ctrl	dox	OK	0.0891613	1.63353	4.19543	2.69853	0.01245	0.0711004	no	4.05088
DDX26B-AS1	DDX26B-AS1	DDX26B-AS1	chrX:134654007-134716460	ctrl	dox	OK	0	0.155719	inf	#NAME?	0.20405	0.468441	no	4.05067
LRRC52	LRRC52	LRRC52	chr1:165446078-165551341	ctrl	dox	OK	0	0.155245	inf	#NAME?	0.1142	0.338248	no	4.04653
CXCL6	CXCL6	CXCL6	chr4:74702272-74704477	ctrl	dox	OK	0	0.154969	inf	#NAME?	0.0015	0.0134059	yes	4.04412
ADAMTS14	ADAMTS14	ADAMTS14	chr10:72432558-72522195	ctrl	dox	OK	0.00598776	0.252308	5.39703	1.66574	0.24435	0.516457	no	4.03622
CTSW	CTSW	CTSW	chr11:65647283-65656010	ctrl	dox	OK	0.517796	8.64756	4.06184	1.65079	0.14065	0.380155	no	4.03591
HSPB2-C11orf52	HSPB2-C11orf52	HSPB2-C11orf52	chr11:111779343-111797595	ctrl	dox	OK	0	0.153835	inf	#NAME?	0.17185	0.424834	no	4.03417
TEX29	TEX29	TEX29	chr13:111973014-111996594	ctrl	dox	OK	0.0292608	0.632835	4.43479	1.01352	0.1404	0.37988	no	4.03329
CAMK2A	CAMK2A	CAMK2A	chr5:149599053-149669403	ctrl	dox	OK	0.0265318	0.588048	4.47014	3.42822	0.0018	0.0155529	yes	4.03304
CES5A	CES5A	CES5A	chr16:55880065-55989943	ctrl	dox	OK	0	0.153568	inf	#NAME?	5e-05	0.000758876	yes	4.03182
VILL	VILL	VILL	chr3:38035077-38048676	ctrl	dox	OK	2.34279	38.3606	4.03333	7.73114	5e-05	0.000758876	yes	4.02756
FOXS1	FOXS1	FOXS1	chr20:30432102-30433420	ctrl	dox	OK	0	0.152637	inf	#NAME?	5e-05	0.000758876	yes	4.02358
DSP	DSP	DSP	chr6:7541869-7586946	ctrl	dox	OK	0.0022498	0.188853	6.39132	1.07807	0.2333	0.504748	no	4.02087
KHDRBS2	KHDRBS2	KHDRBS2	chr6:62389864-62996100	ctrl	dox	OK	0	0.151995	inf	#NAME?	0.0001	0.00140493	yes	4.01788
FAM83A	FAM83A	FAM83A	chr8:124191286-124222319	ctrl	dox	OK	0	0.151895	inf	#NAME?	5e-05	0.000758876	yes	4.01699
HAP1	HAP1	HAP1	chr17:39878890-39890898	ctrl	dox	OK	0.0147509	0.388643	4.71957	1.84058	0.1441	0.385821	no	4.00954
LCN15	LCN15	LCN15	chr9:139654085-139658965	ctrl	dox	OK	0	0.150846	inf	#NAME?	0.00335	0.0254331	yes	4.00761
DOK2	DOK2	DOK2	chr8:21766383-21771205	ctrl	dox	OK	0.0517201	0.981976	4.24689	3.1655	0.00975	0.0587257	no	4.00649
ELF3	ELF3	ELF3	chr1:201979689-201986315	ctrl	dox	OK	0.0241836	0.539313	4.47902	2.22408	0.13305	0.367865	no	4.00625
CLEC17A	CLEC17A	CLEC17A	chr19:14693895-14721956	ctrl	dox	OK	0.0582309	1.0836	4.2179	2.2648	0.00015	0.001995	yes	4.00252
GPX3	GPX3	GPX3	chr5:150399998-150408554	ctrl	dox	OK	0.142741	2.43195	4.09064	3.5774	0.0002	0.00255224	yes	3.99887
LOC102723513	LOC102723513	LOC102723513	chr19:35413918-35417730	ctrl	dox	OK	0	0.149699	inf	#NAME?	0.12495	0.35414	no	3.99728
CCDC169-SOHLH2	CCDC169-SOHLH2	CCDC169-SOHLH2	chr13:36742344-36871992	ctrl	dox	OK	0	0.149481	inf	#NAME?	0.2204	0.489945	no	3.99531
GATA3-AS1	GATA3-AS1	GATA3-AS1	chr10:8092412-8095447	ctrl	dox	OK	0	0.148317	inf	#NAME?	0.0461	0.184967	no	3.98474
TRIM54	TRIM54	TRIM54	chr2:27505296-27531130	ctrl	dox	OK	0.0277767	0.583851	4.39365	1.05742	0.1509	0.39617	no	3.97453
CHRM4	CHRM4	CHRM4	chr11:46406639-46408107	ctrl	dox	OK	0.161359	2.6816	4.05475	3.30598	0.0009	0.00885452	yes	3.97337
TNFRSF25	TNFRSF25	TNFRSF25	chr1:6521213-6580121	ctrl	dox	OK	0.103273	1.76909	4.09847	1.39975	0.004	0.0290534	yes	3.97326
KRT16P1	KRT16P1	KRT16P1	chr17:18343221-18346208	ctrl	dox	OK	0	0.146534	inf	#NAME?	0.0001	0.00140493	yes	3.9684
RARRES2	RARRES2	RARRES2	chr7:150035406-150038763	ctrl	dox	OK	0	0.146076	inf	#NAME?	0.0136	0.0758583	no	3.96418
ASB2	ASB2	ASB2	chr14:94400498-94443076	ctrl	dox	OK	1.99283	31.199	3.96861	6.88605	5e-05	0.000758876	yes	3.96185
GYG2P1	GYG2P1	GYG2P1	chrY:14517914-14533389	ctrl	dox	OK	0	0.145695	inf	#NAME?	0.00645	0.0422355	yes	3.96065
PTPN6	PTPN6	PTPN6	chr12:7055739-7070479	ctrl	dox	OK	0.113579	1.9127	4.07385	3.72863	5e-05	0.000758876	yes	3.95963
FGF8	FGF8	FGF8	chr10:103529886-103540126	ctrl	dox	OK	0	0.144943	inf	#NAME?	5e-05	0.000758876	yes	3.95367
APOA2	APOA2	APOA2	chr1:161192082-161193418	ctrl	dox	OK	0	0.144902	inf	#NAME?	0.0489	0.191577	no	3.95328
SRL	SRL	SRL	chr16:4239374-4292081	ctrl	dox	OK	0.0103938	0.305834	4.87896	2.3138	0.24795	0.518496	no	3.95296
SPACA4	SPACA4	SPACA4	chr19:49103856-49116694	ctrl	dox	OK	0	0.144333	inf	#NAME?	0.1513	0.397046	no	3.94797
NXPH3	NXPH3	NXPH3	chr17:47653297-47661171	ctrl	dox	OK	0.0176153	0.415497	4.55994	2.94543	0.01245	0.0711004	no	3.94561
RBP4	RBP4	RBP4	chr10:95351592-95360993	ctrl	dox	OK	0	0.143902	inf	#NAME?	0.00195	0.0166092	yes	3.94394
CLDN7	CLDN7	CLDN7	chr17:7155371-7166512	ctrl	dox	OK	0.0998946	1.6803	4.07217	0.89241	0.05115	0.197335	no	3.94309
TM4SF5	TM4SF5	TM4SF5	chr17:4675186-4686506	ctrl	dox	OK	0	0.143579	inf	#NAME?	0.0126	0.0717062	no	3.94091
SAMD14	SAMD14	SAMD14	chr17:48172100-48207246	ctrl	dox	OK	0.0355261	0.688982	4.27752	1.08035	0.0843	0.278185	no	3.94049
GDF5	GDF5	GDF5	chr20:34021144-34025970	ctrl	dox	OK	0	0.143355	inf	#NAME?	5e-05	0.000758876	yes	3.9388
COL6A2	COL6A2	COL6A2	chr21:47518032-47552763	ctrl	dox	OK	0.84932	13.1573	3.95342	6.28517	5e-05	0.000758876	yes	3.93762
ALOX12P2	ALOX12P2	ALOX12P2	chr17:6756894-6803668	ctrl	dox	OK	0.0172957	0.408165	4.56067	1.35144	0.2463	0.517698	no	3.93733
COMP	COMP	COMP	chr19:18893582-18902114	ctrl	dox	OK	0.00550274	0.226864	5.36554	0.937798	0.1404	0.37988	no	3.93346
CD300C	CD300C	CD300C	chr17:72537204-72542310	ctrl	dox	OK	0.546818	8.49468	3.95743	4.04327	5e-05	0.000758876	yes	3.93298
SELV	SELV	SELV	chr19:40005752-40011326	ctrl	dox	OK	0	0.142572	inf	#NAME?	5e-05	0.000758876	yes	3.93142
LOC101928436	LOC101928436	LOC101928436	chr1:103960700-104068105	ctrl	dox	OK	0	0.142007	inf	#NAME?	0.0304	0.136492	no	3.92607
WNT9A	WNT9A	WNT9A	chr1:228109164-228135676	ctrl	dox	OK	3.37598	51.4532	3.92988	6.52831	5e-05	0.000758876	yes	3.9259
GFI1B	GFI1B	GFI1B	chr9:135854097-135867084	ctrl	dox	OK	0	0.14197	inf	#NAME?	5e-05	0.000758876	yes	3.92571
NAT8	NAT8	NAT8	chr2:73867849-73869537	ctrl	dox	OK	0.0840611	1.41125	4.0694	2.1831	0.03515	0.15226	no	3.91742
CLDN9	CLDN9	CLDN9	chr16:3062456-3064506	ctrl	dox	OK	0	0.141035	inf	#NAME?	5e-05	0.000758876	yes	3.91681
COL26A1	COL26A1	COL26A1	chr7:101006100-101202304	ctrl	dox	OK	0.00942094	0.281158	4.89936	1.224	0.2273	0.498616	no	3.90612
ACCSL	ACCSL	ACCSL	chr11:44069530-44081527	ctrl	dox	OK	0.147358	2.32967	3.98273	3.36819	0.0004	0.00458914	yes	3.89418
BPIFB2	BPIFB2	BPIFB2	chr20:31595383-31611515	ctrl	dox	OK	0	0.138543	inf	#NAME?	5e-05	0.000758876	yes	3.89281
IL1RN	IL1RN	IL1RN	chr2:113875469-113891593	ctrl	dox	OK	0.0114744	0.30881	4.75023	0.530816	0.4848	0.741636	no	3.89201
PIK3IP1	PIK3IP1	PIK3IP1	chr22:31677578-31688520	ctrl	dox	OK	0.0532509	0.928147	4.12348	2.57136	0.1129	0.336061	no	3.89066
CHRNB4	CHRNB4	CHRNB4	chr15:78916635-78933587	ctrl	dox	OK	0	0.13792	inf	#NAME?	5e-05	0.000758876	yes	3.88675
RND2	RND2	RND2	chr17:41177257-41184058	ctrl	dox	OK	0.0350635	0.654918	4.22327	2.96348	0.0042	0.0302006	yes	3.88315
OR52E4	OR52E4	OR52E4	chr11:5905522-5906461	ctrl	dox	OK	0	0.13714	inf	#NAME?	0.01855	0.0954615	no	3.87912
GFRA2	GFRA2	GFRA2	chr8:21549529-21646346	ctrl	dox	OK	0	0.136658	inf	#NAME?	5e-05	0.000758876	yes	3.87438
PCP4L1	PCP4L1	PCP4L1	chr1:161228516-161255240	ctrl	dox	OK	0	0.136202	inf	#NAME?	0.00065	0.00685708	yes	3.86989
IPO11-LRRC70	IPO11-LRRC70,LRRC70	IPO11-LRRC70,LRRC70	chr5:61708572-61924416	ctrl	dox	OK	0	0.135786	inf	#NAME?	0.1523	0.398564	no	3.86578
ITGA9	ITGA9	ITGA9	chr3:37493812-37903271	ctrl	dox	OK	0.181023	2.74255	3.92128	3.14059	0.00045	0.00505616	yes	3.84895
ASPG	ASPG	ASPG	chr14:104552022-104579046	ctrl	dox	OK	0	0.133538	inf	#NAME?	5e-05	0.000758876	yes	3.84336
N4BP3	N4BP3	N4BP3	chr5:177540555-177553107	ctrl	dox	OK	0.0964921	1.50861	3.96666	4.30345	5e-05	0.000758876	yes	3.83393
GIPR	GIPR	GIPR	chr19:46171501-46185717	ctrl	dox	OK	0.135086	2.05292	3.92573	3.631	0.00015	0.001995	yes	3.82971
PTGDR2	PTGDR2	PTGDR2	chr11:60609428-60623444	ctrl	dox	OK	0.18298	2.73236	3.90039	1.7805	0.18565	0.443913	no	3.82889
LOC389641	LOC389641	LOC389641	chr8:23082733-23088439	ctrl	dox	OK	0	0.132049	inf	#NAME?	0.00015	0.001995	yes	3.82832
ZBP1	ZBP1	ZBP1	chr20:56178901-56195632	ctrl	dox	OK	0.00690387	0.228828	5.05072	0.361016	0.24935	0.519684	no	3.82055
RAB4B-EGLN2	RAB4B-EGLN2	RAB4B-EGLN2	chr19:41281081-41314346	ctrl	dox	OK	0.094861	1.46645	3.95037	0.746192	0.3829	0.65764	no	3.81558
TP53I11	TP53I11	TP53I11	chr11:44785975-44972857	ctrl	dox	OK	0	0.130747	inf	#NAME?	0.0335	0.146634	no	3.81503
DEFB1	DEFB1	DEFB1	chr8:6728096-6735529	ctrl	dox	OK	0	0.130637	inf	#NAME?	0.1226	0.35097	no	3.8139
KRT85	KRT85	KRT85	chr12:52753789-52761309	ctrl	dox	OK	0	0.130351	inf	#NAME?	5e-05	0.000758876	yes	3.81097
C1orf94	C1orf94	C1orf94	chr1:34632483-34684731	ctrl	dox	OK	0	0.130145	inf	#NAME?	5e-05	0.000758876	yes	3.80885
CHST8	CHST8	CHST8	chr19:34112860-34264414	ctrl	dox	OK	0	0.130131	inf	#NAME?	0.0499	0.193972	no	3.8087
SEMA7A	SEMA7A	SEMA7A	chr15:74701629-74726299	ctrl	dox	OK	4.29875	60.2709	3.80947	8.7043	5e-05	0.000758876	yes	3.80636
GPR31	GPR31	GPR31	chr6:167570359-167571319	ctrl	dox	OK	0	0.129898	inf	#NAME?	0.00345	0.0259618	yes	3.8063
BHLHE40-AS1	BHLHE40-AS1	BHLHE40-AS1	chr3:4939909-4940620	ctrl	dox	OK	0	0.129831	inf	#NAME?	0.01855	0.0954615	no	3.80561
S100P	S100P	S100P	chr4:6695565-6698897	ctrl	dox	OK	0.893266	12.6026	3.81849	3.52144	0.0001	0.00140493	yes	3.80357
ZNF185	ZNF185	ZNF185	chrX:152082985-152142025	ctrl	dox	OK	1.13537	15.9798	3.81501	5.84546	5e-05	0.000758876	yes	3.80327
TM6SF2	TM6SF2	TM6SF2	chr19:19375173-19384074	ctrl	dox	OK	0.0159303	0.351844	4.46509	1.15148	0.15555	0.402765	no	3.80266
ADAM20P1	ADAM20P1	ADAM20P1	chr14:70935595-70950473	ctrl	dox	OK	0	0.129328	inf	#NAME?	5e-05	0.000758876	yes	3.80041
ADCY8	ADCY8	ADCY8	chr8:131792546-132052835	ctrl	dox	OK	0	0.129325	inf	#NAME?	5e-05	0.000758876	yes	3.80038
MASP1	MASP1	MASP1	chr3:186933872-187009810	ctrl	dox	OK	0.00479946	0.19598	5.35169	0.52887	0.24725	0.518496	no	3.79889
KNDC1	KNDC1	KNDC1	chr10:134973970-135039916	ctrl	dox	OK	0.0122063	0.298635	4.61269	2.97078	0.00795	0.0498402	yes	3.79686
HCRT	HCRT	HCRT	chr17:40336077-40337470	ctrl	dox	OK	0	0.128961	inf	#NAME?	0.0489	0.191577	no	3.79661
PPP4R4	PPP4R4	PPP4R4	chr14:94640648-94746072	ctrl	dox	OK	2.22493	31.0182	3.80128	4.68348	5e-05	0.000758876	yes	3.79528
LRRC10B	LRRC10B	LRRC10B	chr11:61276271-61278490	ctrl	dox	OK	0	0.128699	inf	#NAME?	5e-05	0.000758876	yes	3.79389
LRRC14B	LRRC14B	LRRC14B	chr5:191625-195468	ctrl	dox	OK	0	0.128524	inf	#NAME?	0.00015	0.001995	yes	3.79206
LINGO1	LINGO1	LINGO1	chr15:77905368-77924709	ctrl	dox	OK	0.0248201	0.469271	4.24084	2.257	0.03515	0.15226	no	3.78285
TNNT2	TNNT2	TNNT2	chr1:201328135-201346828	ctrl	dox	OK	0	0.127032	inf	#NAME?	0.0322	0.142718	no	3.77644
FAM83H-AS1	FAM83H-AS1	FAM83H-AS1	chr8:144816309-144828507	ctrl	dox	OK	0.00816342	0.23843	4.86825	1.21374	0.15555	0.402765	no	3.77373
LOC101927911	LOC101927911	LOC101927911	chr17:2699731-2941035	ctrl	dox	OK	0.017595	0.366677	4.38127	0.482325	0.36525	0.641375	no	3.77085
IL1RAPL2	IL1RAPL2	IL1RAPL2	chrX:103810995-105011822	ctrl	dox	OK	0	0.126477	inf	#NAME?	0.101	0.313089	no	3.77059
DGAT2L6	DGAT2L6	DGAT2L6	chrX:69397335-69425553	ctrl	dox	OK	0.0125034	0.297039	4.57025	1.06209	0.1404	0.37988	no	3.77021
KNCN	KNCN	KNCN	chr1:47004367-47069966	ctrl	dox	OK	0	0.126173	inf	#NAME?	0.2179	0.48698	no	3.76737
MEFV	MEFV	MEFV	chr16:3292027-3306627	ctrl	dox	OK	0.0348943	0.599756	4.10331	2.73262	0.00175	0.0152014	yes	3.76363
UBE2E4P	UBE2E4P	UBE2E4P	chrX:14262386-14263545	ctrl	dox	OK	0	0.125434	inf	#NAME?	0.00435	0.0309937	yes	3.75952
DUOXA1	DUOXA1	DUOXA1	chr15:45406522-45422075	ctrl	dox	OK	0.0128092	0.298904	4.54443	0.447589	0.2339	0.505396	no	3.75947
2016-09-05	2016-09-05	2016-09-05	chr22:19701986-19712297	ctrl	dox	OK	0.86852	11.8264	3.76731	3.4922	0.00045	0.00505616	yes	3.75201
SPINT2	SPINT2	SPINT2	chr19:38755097-38783254	ctrl	dox	OK	0.0732644	1.11168	3.92349	2.18668	0.23435	0.505726	no	3.75182
GCGR	GCGR	GCGR	chr17:79762007-79771889	ctrl	dox	OK	0	0.124682	inf	#NAME?	5e-05	0.000758876	yes	3.75149
BANF2	BANF2	BANF2	chr20:17674319-17716517	ctrl	dox	OK	0	0.124141	inf	#NAME?	0.09955	0.31037	no	3.74568
LOC101927457	LOC101927457	LOC101927457	chr20:46608836-46618861	ctrl	dox	OK	0	0.124139	inf	#NAME?	0.1189	0.346173	no	3.74566
AIRE	AIRE	AIRE	chr21:45705720-45718102	ctrl	dox	OK	0.00583339	0.202325	5.11619	0.881325	0.1404	0.37988	no	3.74523
MIR202HG	MIR202HG	MIR202HG	chr10:135059982-135061389	ctrl	dox	OK	0	0.123854	inf	#NAME?	0.1225	0.35097	no	3.74259
NOD2	NOD2	NOD2	chr16:50731049-50766987	ctrl	dox	OK	0.0165235	0.344914	4.38365	2.34085	0.03515	0.15226	no	3.74213
MT1L	MT1L	MT1L	chr16:56651372-56652730	ctrl	dox	OK	0	0.123608	inf	#NAME?	0.12685	0.357157	no	3.73993
TTYH1	TTYH1	TTYH1	chr19:54926604-54947899	ctrl	dox	OK	0.097682	1.42592	3.86766	2.84073	0.00025	0.00312152	yes	3.73713
OR2T1	OR2T1	OR2T1	chr1:248569295-248570405	ctrl	dox	OK	0	0.122881	inf	#NAME?	0.0062	0.0410324	yes	3.73206
ACVRL1	ACVRL1	ACVRL1	chr12:52301201-52317145	ctrl	dox	OK	0.264528	3.63182	3.7792	4.56257	5e-05	0.000758876	yes	3.72963
FLT4	FLT4	FLT4	chr5:180028505-180076624	ctrl	dox	OK	0.0141758	0.310377	4.45252	2.24008	0.1501	0.394994	no	3.72814
MIR7-3HG	MIR7-3HG	MIR7-3HG	chr19:4769116-4772568	ctrl	dox	OK	0	0.122313	inf	#NAME?	0.0587	0.218075	no	3.72588
C19orf33	C19orf33	C19orf33	chr19:38794199-38806606	ctrl	dox	OK	0.0579957	0.889117	3.93835	0.315935	0.24175	0.513319	no	3.72499
ADORA3	ADORA3	ADORA3	chr1:112025969-112106597	ctrl	dox	OK	0.192394	2.66372	3.79131	3.00478	0.00035	0.00411812	yes	3.72361
NALCN-AS1	NALCN-AS1	NALCN-AS1	chr13:101360578-102068813	ctrl	dox	OK	0	0.121959	inf	#NAME?	0.11345	0.33686	no	3.72202
PYDC2	PYDC2	PYDC2	chr3:191178951-191179245	ctrl	dox	OK	0	0.121893	inf	#NAME?	0.0787	0.265712	no	3.7213
VSIG8	VSIG8	VSIG8	chr1:159796478-159832447	ctrl	dox	OK	0.0446077	0.710049	3.99256	1.60857	0.1899	0.450417	no	3.72092
SMIM5	SMIM5	SMIM5	chr17:73584138-73663269	ctrl	dox	OK	0.340327	4.59356	3.75462	2.04885	0.0133	0.0744858	no	3.71598
GGTA1P	GGTA1P	GGTA1P	chr9:124217318-124262306	ctrl	dox	OK	0	0.121397	inf	#NAME?	0.00015	0.001995	yes	3.71586
FXYD4	FXYD4	FXYD4	chr10:43867091-43871783	ctrl	dox	OK	0	0.121011	inf	#NAME?	0.1228	0.351318	no	3.71162
ACTL7B	ACTL7B	ACTL7B	chr9:111616868-111618275	ctrl	dox	OK	0	0.120999	inf	#NAME?	0.00085	0.00846464	yes	3.71148
LOC100506585	LOC100506585	LOC100506585	chr7:157331749-158380482	ctrl	dox	OK	0	0.120669	inf	#NAME?	0.16835	0.421051	no	3.70785
SFN	SFN	SFN	chr1:27189632-27190947	ctrl	dox	OK	0.332251	4.43589	3.73888	3.38897	0.00025	0.00312152	yes	3.69935
SHISA7	SHISA7	SHISA7	chr19:55940104-55954230	ctrl	dox	OK	0.00534973	0.189395	5.14579	1.9427	0.24545	0.517365	no	3.69934
PLEKHG5	PLEKHG5	PLEKHG5	chr1:6521213-6580121	ctrl	dox	OK	0.330757	4.40185	3.73427	4.87608	5e-05	0.000758876	yes	3.69457
FABP3	FABP3	FABP3	chr1:31838099-31845923	ctrl	dox	OK	0.343256	4.55646	3.73056	3.57622	0.0001	0.00140493	yes	3.69229
COX6B2	COX6B2	COX6B2	chr19:55861069-55866182	ctrl	dox	OK	0.122843	1.70371	3.79379	3.26286	0.0002	0.00255224	yes	3.68933
AMZ1	AMZ1	AMZ1	chr7:2719155-2755070	ctrl	dox	OK	0.0804877	1.15696	3.84542	2.89327	0.06475	0.232424	no	3.68889
COL11A2	COL11A2	COL11A2	chr6_ssto_hap7:4610635-4637414	ctrl	dox	OK	7.43296	95.8876	3.68934	8.1377	5e-05	0.000758876	yes	3.68755
CDH3	CDH3	CDH3	chr16:68678150-68732957	ctrl	dox	OK	0.115682	1.60767	3.79673	4.1237	5e-05	0.000758876	yes	3.68607
RNASE7	RNASE7	RNASE7	chr14:21484921-21572863	ctrl	dox	OK	0	0.118688	inf	#NAME?	0.13245	0.367073	no	3.68581
CALML5	CALML5	CALML5	chr10:5540657-5541533	ctrl	dox	OK	0	0.118136	inf	#NAME?	0.00435	0.0309938	yes	3.6796
MRVI1	MRVI1	MRVI1	chr11:10562782-10715535	ctrl	dox	OK	0.036167	0.580439	4.0044	2.90109	5e-05	0.000758876	yes	3.67685
WDR86-AS1	WDR86-AS1	WDR86-AS1	chr7:151078206-151110440	ctrl	dox	OK	0	0.117848	inf	#NAME?	0.13705	0.37494	no	3.67636
SHH	SHH	SHH	chr7:155595557-155604967	ctrl	dox	OK	0.0236011	0.417485	4.1448	1.74554	0.25285	0.521454	no	3.66929
TMEM125	TMEM125	TMEM125	chr1:43735664-43739673	ctrl	dox	OK	0.0461899	0.704026	3.92998	2.42721	0.0219	0.107967	no	3.66759
KCNQ1DN	KCNQ1DN	KCNQ1DN	chr11:2891262-2893336	ctrl	dox	OK	0	0.11697	inf	#NAME?	0.00115	0.0108276	yes	3.66642
OLFM1	OLFM1	OLFM1	chr9:137967088-138013030	ctrl	dox	OK	0	0.116556	inf	#NAME?	5e-05	0.000758876	yes	3.6617
SP6	SP6	SP6	chr17:45922279-45933240	ctrl	dox	OK	0.082754	1.16202	3.81167	3.15407	0.00025	0.00312152	yes	3.65944
SLC28A3	SLC28A3	SLC28A3	chr9:86890764-86983413	ctrl	dox	OK	0.1708	2.27441	3.73511	4.18557	5e-05	0.000758876	yes	3.65936
FAM198A	FAM198A	FAM198A	chr3:43020758-43099207	ctrl	dox	OK	0.352843	4.5732	3.69611	4.70116	5e-05	0.000758876	yes	3.65894
LINC01002	LINC01002	LINC01002	chr19:197015-202209	ctrl	dox	OK	0	0.115828	inf	#NAME?	5e-05	0.000758876	yes	3.65338
C1orf210	C1orf210	C1orf210	chr1:43747556-43751288	ctrl	dox	OK	0	0.115604	inf	#NAME?	0.00035	0.00411812	yes	3.65081
CRYBA1	CRYBA1	CRYBA1	chr17:27573874-27581502	ctrl	dox	OK	0	0.115382	inf	#NAME?	0.0126	0.0717062	no	3.64826
TSGA10IP	TSGA10IP	TSGA10IP	chr11:65713114-65727434	ctrl	dox	OK	0.0274249	0.458727	4.06408	1.83843	0.051	0.196799	no	3.64668
SSTR5-AS1	SSTR5-AS1	SSTR5-AS1	chr16:1114081-1131454	ctrl	dox	OK	0	0.114746	inf	#NAME?	0.165	0.415917	no	3.64092
MRPL23-AS1	MRPL23-AS1	MRPL23-AS1	chr11:2004438-2011150	ctrl	dox	OK	0	0.114638	inf	#NAME?	5e-05	0.000758876	yes	3.63967
ALDH2	ALDH2	ALDH2	chr12:112204690-112247789	ctrl	dox	OK	0	0.11425	inf	#NAME?	5e-05	0.000758876	yes	3.63517
MYOZ3	MYOZ3	MYOZ3	chr5:150040402-150058930	ctrl	dox	OK	0.00625269	0.191684	4.93811	0.931005	0.23735	0.508486	no	3.63335
LINC01213	LINC01213	LINC01213	chr3:149956305-149957992	ctrl	dox	OK	0	0.113483	inf	#NAME?	0.1192	0.346541	no	3.62624
NRARP	NRARP	NRARP	chr9:140194082-140196703	ctrl	dox	OK	0.0971456	1.31166	3.7551	3.16125	0.0004	0.00458914	yes	3.62471
LOC102723344	LOC102723344	LOC102723344	chr15:63682428-63729735	ctrl	dox	OK	0.0136835	0.281678	4.36353	0.85446	0.14045	0.379901	no	3.62242
FCGR1B	FCGR1B	FCGR1B	chr1:120926127-120935944	ctrl	dox	OK	0	0.112938	inf	#NAME?	5e-05	0.000758876	yes	3.61986
FGD2	FGD2	FGD2	chr6:36973422-36996845	ctrl	dox	OK	0.0188148	0.343793	4.1916	2.03547	0.0473	0.18756	no	3.61802
CA9	CA9	CA9	chr9:35673914-35681154	ctrl	dox	OK	0.0274278	0.448782	4.03231	1.84149	0.1237	0.352657	no	3.61563
PTGES	PTGES	PTGES	chr9:132500614-132515344	ctrl	dox	OK	1.50233	18.5233	3.62407	5.31134	5e-05	0.000758876	yes	3.61527
FAM92B	FAM92B	FAM92B	chr16:85131964-85146114	ctrl	dox	OK	0.0222717	0.385412	4.11312	1.88709	0.24795	0.518496	no	3.61502
KRTAP5-1	KRTAP5-1	KRTAP5-1	chr11:1593970-1620414	ctrl	dox	OK	0	0.111978	inf	#NAME?	0.19535	0.457243	no	3.60855
SLC22A14	SLC22A14	SLC22A14	chr3:38347444-38359859	ctrl	dox	OK	0.0204215	0.361036	4.14398	1.79572	0.25285	0.521454	no	3.6084
CBFA2T3	CBFA2T3	CBFA2T3	chr16:88941262-89043504	ctrl	dox	OK	0.00344225	0.153812	5.48167	0.670068	0.21615	0.485	no	3.60719
OR2M1P	OR2M1P	OR2M1P	chr1:248285437-248286082	ctrl	dox	OK	0	0.111755	inf	#NAME?	0.06825	0.240516	no	3.60591
KRT16	KRT16	KRT16	chr17:39766030-39769079	ctrl	dox	OK	0.221399	2.80092	3.66118	3.8306	5e-05	0.000758876	yes	3.60259
GGT3P	GGT3P	GGT3P	chr22:18761201-18779474	ctrl	dox	OK	0.00983455	0.230872	4.55309	1.09598	0.17165	0.42469	no	3.60218
HYAL1	HYAL1	HYAL1	chr3:50337319-50349812	ctrl	dox	OK	0.486424	6.01293	3.62778	4.1641	5e-05	0.000758876	yes	3.60082
LRRC32	LRRC32	LRRC32	chr11:76368567-76381791	ctrl	dox	OK	0	0.110888	inf	#NAME?	5e-05	0.000758876	yes	3.5956
MUC2	MUC2	MUC2	chr11:1074874-1104416	ctrl	dox	OK	0.00205464	0.13568	6.04518	1.36057	0.17165	0.42469	no	3.59514
DAO	DAO	DAO	chr12:109273856-109294710	ctrl	dox	OK	0	0.110682	inf	#NAME?	0.0003	0.00361996	yes	3.59314
ADAM8	ADAM8	ADAM8	chr10:135075919-135090407	ctrl	dox	OK	0.192976	2.4395	3.6601	4.20455	5e-05	0.000758876	yes	3.59311
ENTPD2	ENTPD2	ENTPD2	chr9:139942550-139948503	ctrl	dox	OK	0	0.110601	inf	#NAME?	5e-05	0.000758876	yes	3.59217
LOC101927196	LOC101927196	LOC101927196	chr2:186584600-186698016	ctrl	dox	OK	0	0.110063	inf	#NAME?	0.02215	0.108841	no	3.58572
CTD-2258A20.5	CTD-2258A20.5	CTD-2258A20.5	chr16:66461199-66527432	ctrl	dox	OK	0	0.109987	inf	#NAME?	0.17545	0.429769	no	3.58481
FAM90A1	FAM90A1	FAM90A1	chr12:8373855-8380214	ctrl	dox	OK	0.0579256	0.804688	3.79616	3.12406	0.00085	0.00846464	yes	3.58422
KIF21B	KIF21B	KIF21B	chr1:200938513-200992828	ctrl	dox	OK	0.14024	1.79087	3.67469	4.76227	5e-05	0.000758876	yes	3.58335
IRGC	IRGC	IRGC	chr19:44220213-44224169	ctrl	dox	OK	0	0.109781	inf	#NAME?	5e-05	0.000758876	yes	3.58233
CHD5	CHD5	CHD5	chr1:6161846-6240194	ctrl	dox	OK	0.0386455	0.570946	3.88498	4.06415	5e-05	0.000758876	yes	3.57803
SLC5A9	SLC5A9	SLC5A9	chr1:48688356-48714316	ctrl	dox	OK	0.33926	4.15979	3.61605	4.43556	5e-05	0.000758876	yes	3.5776
TCEAL6	TCEAL6	TCEAL6	chrX:101394932-101397388	ctrl	dox	OK	0	0.109106	inf	#NAME?	0.00555	0.0375897	yes	3.57417
MYRF	MYRF	MYRF	chr11:61520120-61555989	ctrl	dox	OK	0.252452	3.11365	3.62453	4.69441	5e-05	0.000758876	yes	3.57311
VWA2	VWA2	VWA2	chr10:115999012-116054259	ctrl	dox	OK	0.0534415	0.744078	3.79942	3.43326	0.0001	0.00140493	yes	3.57121
DLL1	DLL1	DLL1	chr6:170591293-170599697	ctrl	dox	OK	0.0736055	0.983721	3.74036	3.23322	0.00025	0.00312152	yes	3.57117
FAM71E2	FAM71E2	FAM71E2	chr19:55866275-55874620	ctrl	dox	OK	0	0.108857	inf	#NAME?	5e-05	0.000758876	yes	3.57115
FLJ26245	FLJ26245	FLJ26245	chr16:34980922-34990995	ctrl	dox	OK	0.0459998	0.655575	3.83306	1.85778	0.00265	0.0212225	yes	3.57111
LINC00163	LINC00163	LINC00163	chr21:46409778-46414001	ctrl	dox	OK	0	0.108853	inf	#NAME?	5e-05	0.000758876	yes	3.57111
LOC101927318	LOC101927318	LOC101927318	chr12:50344523-50359465	ctrl	dox	OK	0	0.108741	inf	#NAME?	0.04695	0.186625	no	3.56975
FSTL3	FSTL3	FSTL3	chr19:676388-683392	ctrl	dox	OK	8.09918	96.2766	3.57134	8.23095	5e-05	0.000758876	yes	3.56971
SEMA3B	SEMA3B	SEMA3B	chr3:50304989-50314602	ctrl	dox	OK	8.42384	99.8424	3.5671	8.59207	5e-05	0.000758876	yes	3.56554
LOC100129083	LOC100129083	LOC100129083	chr19:51913274-51921057	ctrl	dox	OK	0	0.108272	inf	#NAME?	0.0142	0.0784737	no	3.56404
TNK1	TNK1	TNK1	chr17:7284292-7307450	ctrl	dox	OK	0.0284572	0.444659	3.96583	0.743595	0.0598	0.220837	no	3.56346
LOC101929613	LOC101929613	LOC101929613	chr16:3048955-3050814	ctrl	dox	OK	0	0.107961	inf	#NAME?	0.1039	0.319002	no	3.56024
LINC00574	LINC00574	LINC00574	chr6:170188885-170202969	ctrl	dox	OK	0.00823195	0.204891	4.63748	0.643086	0.2448	0.5168	no	3.55906
RAB11FIP4	RAB11FIP4	RAB11FIP4	chr17:29718641-29865232	ctrl	dox	OK	5.72572	67.5906	3.56129	9.09358	5e-05	0.000758876	yes	3.55899
ENTPD8	ENTPD8	ENTPD8	chr9:140317846-140335901	ctrl	dox	OK	0.0360986	0.533153	3.88454	1.16693	0.12225	0.350807	no	3.55856
IL31	IL31	IL31	chr12:122652265-122688018	ctrl	dox	OK	0	0.107657	inf	#NAME?	0.22415	0.49428	no	3.55652
LOC101927230	LOC101927230	LOC101927230	chr17:48292054-48292781	ctrl	dox	OK	0	0.10755	inf	#NAME?	0.1226	0.35097	no	3.5552
PSG2	PSG2	PSG2	chr19:43568361-43586893	ctrl	dox	OK	0.0126695	0.25609	4.33721	1.00379	0.1557	0.402765	no	3.55309
ZAP70	ZAP70	ZAP70	chr2:98330030-98356323	ctrl	dox	OK	0.00800175	0.201224	4.65234	0.539835	0.21225	0.479425	no	3.55256
MFNG	MFNG	MFNG	chr22:37865100-37882478	ctrl	dox	OK	0.102395	1.30813	3.67529	2.66374	0.00045	0.00505616	yes	3.55184
LOC101927865	LOC101927865	LOC101927865	chr2:208051413-208119040	ctrl	dox	OK	0	0.106967	inf	#NAME?	0.0312	0.139283	no	3.54803
TPRG1-AS2	TPRG1-AS2	TPRG1-AS2	chr3:188889762-189041271	ctrl	dox	OK	0	0.106813	inf	#NAME?	0.1846	0.442404	no	3.54613
MST1R	MST1R	MST1R	chr3:49924435-49941306	ctrl	dox	OK	0.0942099	1.20274	3.67431	3.66913	0.0001	0.00140493	yes	3.54071
CLIC3	CLIC3	CLIC3	chr9:139889059-139891024	ctrl	dox	OK	0.301815	3.61631	3.58278	2.8806	0.0012	0.0112102	yes	3.53974
AMPD3	AMPD3	AMPD3	chr11:10471867-10529126	ctrl	dox	OK	0.267208	3.21237	3.5876	4.29078	5e-05	0.000758876	yes	3.53908
PALD1	PALD1	PALD1	chr10:72238563-72328206	ctrl	dox	OK	0.119136	1.48861	3.64328	3.96416	5e-05	0.000758876	yes	3.53666
FASLG	FASLG	FASLG	chr1:172628184-172636012	ctrl	dox	OK	0.0889423	1.13794	3.67741	2.61738	0.0023	0.0189695	yes	3.53632
CHADL	CHADL	CHADL	chr22:41601312-41636935	ctrl	dox	OK	1.04291	12.2005	3.54826	2.09691	0.14765	0.391647	no	3.53567
SULF2	SULF2	SULF2	chr20:46286149-46415360	ctrl	dox	OK	0.0179567	0.314157	4.12889	1.99377	0.0023	0.0189695	yes	3.53543
LFNG	LFNG	LFNG	chr7:2552162-2568810	ctrl	dox	OK	1.39973	16.3288	3.54419	5.06571	5e-05	0.000758876	yes	3.53481
RPL3L	RPL3L	RPL3L	chr16:1994579-2004679	ctrl	dox	OK	0	0.105686	inf	#NAME?	0.0004	0.00458914	yes	3.53214
SERPINA9	SERPINA9	SERPINA9	chr14:94929057-94942670	ctrl	dox	OK	0	0.105551	inf	#NAME?	5e-05	0.000758876	yes	3.53046
SYT3	SYT3	SYT3	chr19:51125233-51143092	ctrl	dox	OK	0.435103	5.11739	3.55598	4.37644	5e-05	0.000758876	yes	3.52601
GLT1D1	GLT1D1	GLT1D1	chr12:129338080-129469509	ctrl	dox	OK	0	0.105192	inf	#NAME?	5e-05	0.000758876	yes	3.52597
CDC42EP1	CDC42EP1	CDC42EP1	chr22:37956470-37965410	ctrl	dox	OK	0.258597	3.08227	3.57521	3.94995	5e-05	0.000758876	yes	3.52515
TTC16	TTC16	TTC16	chr9:130478357-130497628	ctrl	dox	OK	0.116342	1.44385	3.63348	1.72089	0.21355	0.480909	no	3.52447
TEKT2	TEKT2	TEKT2	chr1:36549675-36553876	ctrl	dox	OK	0	0.105022	inf	#NAME?	5e-05	0.000758876	yes	3.52384
SPATA31A3	SPATA31A3	SPATA31A3	chr9:40700290-40706537	ctrl	dox	OK	0.0107956	0.228724	4.40509	1.70678	0.09	0.290586	no	3.52099
MYLK2	MYLK2	MYLK2	chr20:30407177-30422500	ctrl	dox	OK	0.0769022	0.984524	3.67833	3.46613	0.0004	0.00458914	yes	3.51654
TLE2	TLE2	TLE2	chr19:2997635-3047633	ctrl	dox	OK	0.33166	3.89792	3.55493	4.24327	5e-05	0.000758876	yes	3.51577
DIAPH3-AS1	DIAPH3-AS1	DIAPH3-AS1	chr13:60239720-60738119	ctrl	dox	OK	0	0.104311	inf	#NAME?	0.0039	0.0284884	yes	3.51489
TMIGD2	TMIGD2	TMIGD2	chr19:4292224-4302428	ctrl	dox	OK	0.0293892	0.440103	3.90448	1.251	0.2052	0.470125	no	3.51438
HSD3B2	HSD3B2	HSD3B2	chr1:119957553-119965662	ctrl	dox	OK	0	0.104155	inf	#NAME?	0.0468	0.186401	no	3.51292
CLCNKB	CLCNKB	CLCNKB	chr1:16370230-16383821	ctrl	dox	OK	0.0931809	1.1673	3.64699	2.98959	0.00055	0.00600319	yes	3.51223
GBGT1	GBGT1	GBGT1	chr9:136028334-136039332	ctrl	dox	OK	0.0511627	0.687319	3.74782	1.70041	0.00015	0.001995	yes	3.51109
REM1	REM1	REM1	chr20:30063090-30072708	ctrl	dox	OK	0.0877971	1.10407	3.65251	3.00975	0.0013	0.0119639	yes	3.5099
H1F0	H1F0	H1F0	chr22:38201113-38203443	ctrl	dox	OK	0.239275	2.82722	3.56264	3.78913	5e-05	0.000758876	yes	3.50867
DUSP13	DUSP13	DUSP13	chr10:76854189-76868970	ctrl	dox	OK	0.571748	6.60974	3.53114	3.42291	5e-05	0.000758876	yes	3.50831
SMIM24	SMIM24	SMIM24	chr19:3474404-3480540	ctrl	dox	OK	0.0628618	0.818648	3.70299	1.78235	0.0473	0.18756	no	3.50752
PLCH2	PLCH2	PLCH2	chr1:2407753-2436964	ctrl	dox	OK	0.0535036	0.71125	3.73265	3.44626	0.0004	0.00458914	yes	3.50559
NAGS	NAGS	NAGS	chr17:42082031-42086436	ctrl	dox	OK	0.958433	10.9852	3.51874	4.98271	5e-05	0.000758876	yes	3.50508
KCNN1	KCNN1	KCNN1	chr19:18062110-18109930	ctrl	dox	OK	0.0426786	0.588	3.78423	2.7197	0.00215	0.0179634	yes	3.50486
PRR18	PRR18	PRR18	chr6:166719167-166721871	ctrl	dox	OK	0	0.103386	inf	#NAME?	5e-05	0.000758876	yes	3.50317
DMBX1	DMBX1	DMBX1	chr1:46972667-46979886	ctrl	dox	OK	0	0.103314	inf	#NAME?	5e-05	0.000758876	yes	3.50225
SUSD4	SUSD4	SUSD4	chr1:223394160-223537544	ctrl	dox	OK	0.136577	1.65005	3.59473	3.07137	0.00025	0.00312152	yes	3.5015
LINC00994	LINC00994	LINC00994	chr3:64053639-64211131	ctrl	dox	OK	0	0.103245	inf	#NAME?	0.1551	0.402765	no	3.50138
NR5A1	NR5A1	NR5A1	chr9:127243514-127269699	ctrl	dox	OK	0	0.103106	inf	#NAME?	5e-05	0.000758876	yes	3.4996
HAPLN4	HAPLN4	HAPLN4	chr19:19366451-19373596	ctrl	dox	OK	0	0.102601	inf	#NAME?	5e-05	0.000758876	yes	3.49315
VHLL	VHLL	VHLL	chr1:156268414-156269428	ctrl	dox	OK	0	0.102589	inf	#NAME?	0.00885	0.0543254	no	3.49299
KCNK17	KCNK17	KCNK17	chr6:39266776-39282237	ctrl	dox	OK	0	0.102339	inf	#NAME?	0.0003	0.00361996	yes	3.48979
KCNQ2	KCNQ2	KCNQ2	chr20:62037541-62103993	ctrl	dox	OK	0	0.102197	inf	#NAME?	5e-05	0.000758876	yes	3.48796
APOC2	APOC2	APOC2	chr19:45445494-45452822	ctrl	dox	OK	0.826591	9.36948	3.50272	2.83672	0.0003	0.00361996	yes	3.48691
CD8B	CD8B	CD8B	chr2:87042459-87122165	ctrl	dox	OK	0.0397197	0.546961	3.78351	0.747369	0.01255	0.0715804	no	3.48569
C12orf80	C12orf80	C12orf80	chr12:52599364-52604639	ctrl	dox	OK	0	0.102008	inf	#NAME?	0.0025	0.0203111	yes	3.48553
VASN	VASN	VASN	chr16:4390251-4466962	ctrl	dox	OK	1.00073	11.297	3.49682	2.92588	0.0003	0.00361996	yes	3.48375
WNT1	WNT1	WNT1	chr12:49372235-49376396	ctrl	dox	OK	0.0098528	0.212001	4.42739	1.10396	0.15555	0.402765	no	3.48315
OPN5	OPN5	OPN5	chr6:47749774-47794116	ctrl	dox	OK	0.0231778	0.360887	3.96073	2.16531	0.25255	0.521454	no	3.48269
LEFTY2	LEFTY2	LEFTY2	chr1:226124297-226129083	ctrl	dox	OK	0	0.101753	inf	#NAME?	0.03565	0.153684	no	3.48224
MPO	MPO	MPO	chr17:56347216-56358296	ctrl	dox	OK	0	0.10153	inf	#NAME?	5e-05	0.000758876	yes	3.47936
TRIM48	TRIM48	TRIM48	chr11:55029657-55038595	ctrl	dox	OK	22.2403	247.985	3.47901	8.52087	5e-05	0.000758876	yes	3.47841
GFAP	GFAP	GFAP	chr17:42982993-42992920	ctrl	dox	OK	0.138457	1.63292	3.55995	3.53119	5e-05	0.000758876	yes	3.46815
CNN1	CNN1	CNN1	chr19:11649578-11661138	ctrl	dox	OK	0.102391	1.23179	3.58859	2.93281	0.00075	0.007695	yes	3.46582
C1QTNF5	C1QTNF5	C1QTNF5	chr11:119209643-119217383	ctrl	dox	OK	0	0.100387	inf	#NAME?	0.001	0.00966882	yes	3.4645
FCGRT	FCGRT	FCGRT	chr19:50015535-50029685	ctrl	dox	OK	0.0310844	0.44292	3.83278	1.74981	0.25175	0.521177	no	3.46259
RNF183	RNF183	RNF183	chr9:116059372-116061320	ctrl	dox	OK	0	0.100029	inf	#NAME?	0.0029	0.0227378	yes	3.45981
FGD3	FGD3	FGD3	chr9:95709600-95798518	ctrl	dox	OK	0.266704	3.03227	3.50708	4.41714	5e-05	0.000758876	yes	3.45873
MYOM3	MYOM3	MYOM3	chr1:24382530-24438665	ctrl	dox	OK	0.0136414	0.249756	4.19446	2.61152	0.00775	0.0490314	yes	3.45777
CRB3	CRB3	CRB3	chr19:6464259-6481819	ctrl	dox	OK	0.116784	1.38151	3.56433	2.10454	0.0077	0.0487839	yes	3.45621
GPER1	GPER1	GPER1	chr7:1036622-1177893	ctrl	dox	OK	0.187973	2.16081	3.52298	1.12866	0.0495	0.193002	no	3.45486
SLA	SLA	SLA	chr8:133879204-134147143	ctrl	dox	OK	0	0.0995875	inf	#NAME?	0.04985	0.193819	no	3.45401
MOG	MOG	MOG	chr6_ssto_hap7:965313-980702	ctrl	dox	OK	0.428666	4.79445	3.48344	3.91905	5e-05	0.000758876	yes	3.45318
S100A5	S100A5	S100A5	chr1:153509622-153514241	ctrl	dox	OK	1.06628	11.7596	3.46318	3.66898	5e-05	0.000758876	yes	3.45094
COL23A1	COL23A1	COL23A1	chr5:177664616-178017556	ctrl	dox	OK	0	0.0990578	inf	#NAME?	5e-05	0.000758876	yes	3.44702
LZTS1-AS1	LZTS1-AS1	LZTS1-AS1	chr8:20133283-20147969	ctrl	dox	OK	0	0.0989463	inf	#NAME?	0.0332	0.145747	no	3.44555
TRERNA1	TRERNA1	TRERNA1	chr20:48657243-48658166	ctrl	dox	OK	0	0.0987897	inf	#NAME?	0.05475	0.207042	no	3.44347
PRX	PRX	PRX	chr19:40899670-40919271	ctrl	dox	OK	0.709485	7.81228	3.4609	5.86288	5e-05	0.000758876	yes	3.44255
OR8B12	OR8B12	OR8B12	chr11:124412617-124413550	ctrl	dox	OK	0	0.0986602	inf	#NAME?	0.0489	0.191577	no	3.44175
GPD1	GPD1	GPD1	chr12:50497601-50505103	ctrl	dox	OK	0.289215	3.24023	3.48588	4.20773	5e-05	0.000758876	yes	3.44129
PTPLA	PTPLA	PTPLA	chr10:17631957-17659373	ctrl	dox	OK	0	0.0985318	inf	#NAME?	0.0124	0.0709051	no	3.44005
PPIC	PPIC	PPIC	chr5:122359077-122372425	ctrl	dox	OK	0	0.0983116	inf	#NAME?	0.0147	0.0804691	no	3.43712
FAM110C	FAM110C	FAM110C	chr2:38813-46588	ctrl	dox	OK	0	0.0982549	inf	#NAME?	5e-05	0.000758876	yes	3.43636
PCK1	PCK1	PCK1	chr20:56136136-56141513	ctrl	dox	OK	0	0.0982176	inf	#NAME?	5e-05	0.000758876	yes	3.43586
SLC12A7	SLC12A7	SLC12A7	chr5:1050488-1112172	ctrl	dox	OK	0.189023	2.14326	3.50318	4.28627	5e-05	0.000758876	yes	3.43552
ITGB2	ITGB2	ITGB2	chr21:46305867-46349595	ctrl	dox	OK	0.0324151	0.448796	3.79132	1.93584	0.02095	0.104401	no	3.4352
SH2D1A	SH2D1A	SH2D1A	chrX:123480131-123507010	ctrl	dox	OK	0.0513433	0.651326	3.66513	2.22438	0.00435	0.0309938	yes	3.43038
PEAR1	PEAR1	PEAR1	chr1:156863522-156886226	ctrl	dox	OK	0.155404	1.76618	3.50654	3.52363	5e-05	0.000758876	yes	3.42471
SUSD3	SUSD3	SUSD3	chr9:95820969-95847418	ctrl	dox	OK	0	0.0973649	inf	#NAME?	5e-05	0.000758876	yes	3.42445
EFNA2	EFNA2	EFNA2	chr19:1286152-1301429	ctrl	dox	OK	0.0217501	0.330544	3.92575	1.87947	0.24795	0.518496	no	3.42301
SLC6A7	SLC6A7	SLC6A7	chr5:149569519-149590635	ctrl	dox	OK	0.00549016	0.156104	4.82951	1.13714	0.15555	0.402765	no	3.42266
GPR17	GPR17	GPR17	chr2:128395995-128439360	ctrl	dox	OK	0.126379	1.44799	3.51822	2.64163	0.00015	0.001995	yes	3.41829
CYP4F12	CYP4F12	CYP4F12	chr19:15783827-15807984	ctrl	dox	OK	0	0.0968444	inf	#NAME?	0.12095	0.349029	no	3.41744
FFAR3	FFAR3	FFAR3	chr19:35849487-35851389	ctrl	dox	OK	0	0.0965066	inf	#NAME?	0.00065	0.00685708	yes	3.41287
ARHGAP9	ARHGAP9	ARHGAP9	chr12:57853917-57873633	ctrl	dox	OK	0.344499	3.75658	3.44685	3.10037	0.0012	0.0112102	yes	3.4094
HEYL	HEYL	HEYL	chr1:40089102-40105348	ctrl	dox	OK	0	0.0961223	inf	#NAME?	5e-05	0.000758876	yes	3.40766
RLTPR	RLTPR	RLTPR	chr16:67679029-67694718	ctrl	dox	OK	0.0528503	0.656503	3.63482	1.08321	0.0743	0.255615	no	3.40662
C10orf91	C10orf91	C10orf91	chr10:134258713-134261825	ctrl	dox	OK	0	0.0960399	inf	#NAME?	0.01505	0.0819105	no	3.40654
H19	H19	H19	chr11:2016405-2019065	ctrl	dox	OK	3.87815	41.1085	3.406	6.89281	5e-05	0.000758876	yes	3.40263
MORN5	MORN5	MORN5	chr9:124922186-124962367	ctrl	dox	OK	0	0.0956162	inf	#NAME?	0.12165	0.34998	no	3.40076
NCRUPAR	NCRUPAR	NCRUPAR	chr5:76008227-76008713	ctrl	dox	OK	0	0.095604	inf	#NAME?	0.12495	0.35414	no	3.40059
LOC101927476	LOC101927476	LOC101927476	chrX:40122169-40146974	ctrl	dox	OK	0.233323	2.55571	3.45333	3.80822	5e-05	0.000758876	yes	3.39841
RIPPLY1	RIPPLY1	RIPPLY1	chrX:106143292-106174091	ctrl	dox	OK	0	0.0950832	inf	#NAME?	0.06775	0.239082	no	3.39346
RHBDL3	RHBDL3	RHBDL3	chr17:30593194-30651680	ctrl	dox	OK	0.0495844	0.616124	3.63526	2.91647	0.00145	0.01305	yes	3.39344
CPLX1	CPLX1	CPLX1	chr4:778744-819945	ctrl	dox	OK	0.0726103	0.857496	3.56188	2.52904	0.00195	0.0166092	yes	3.39246
BPIFA2	BPIFA2	BPIFA2	chr20:31755959-31769223	ctrl	dox	OK	0	0.094827	inf	#NAME?	0.02095	0.104401	no	3.38994
TNRC6C-AS1	TNRC6C-AS1	TNRC6C-AS1	chr17:76000317-76107880	ctrl	dox	OK	0.425276	4.54886	3.41903	1.83163	0.03515	0.15226	no	3.38867
ITLN1	ITLN1	ITLN1	chr1:160846329-160854960	ctrl	dox	OK	0.107933	1.22407	3.50347	2.36877	0.0076	0.0483379	yes	3.38738
ZNF467	ZNF467	ZNF467	chr7:149461452-149470295	ctrl	dox	OK	0.0316728	0.424998	3.74614	1.97685	0.03515	0.15226	no	3.38383
CGB5	CGB5	CGB5	chr19:49547101-49548568	ctrl	dox	OK	0.109737	1.23938	3.4975	2.2026	0.02205	0.108498	no	3.38327
HAMP	HAMP	HAMP	chr19:35773409-35776045	ctrl	dox	OK	0	0.0942822	inf	#NAME?	0.1226	0.35097	no	3.38242
SHANK2-AS1	SHANK2-AS1	SHANK2-AS1	chr11:70313960-70935842	ctrl	dox	OK	0	0.0941911	inf	#NAME?	0.12425	0.35347	no	3.38116
DACT3	DACT3	DACT3	chr19:47150868-47220384	ctrl	dox	OK	0.37027	3.94933	3.41496	2.08676	0.0553	0.208463	no	3.38016
ECEL1	ECEL1	ECEL1	chr2:233344536-233352569	ctrl	dox	OK	0.0072009	0.168822	4.55118	0.769939	0.2323	0.503373	no	3.37797
LOC649352	LOC649352	LOC649352	chr8:12219527-12268510	ctrl	dox	OK	0	0.0937573	inf	#NAME?	0.24425	0.516412	no	3.37514
SRGAP3	SRGAP3	SRGAP3	chr3:9022275-9291369	ctrl	dox	OK	0.0201382	0.302602	3.90942	2.74481	0.1539	0.401056	no	3.37466
LOC101927478	LOC101927478	LOC101927478	chr1:229644176-229649834	ctrl	dox	OK	0	0.0936599	inf	#NAME?	0.12495	0.35414	no	3.37379
WFDC5	WFDC5	WFDC5	chr20:43738092-43743813	ctrl	dox	OK	0	0.0935858	inf	#NAME?	0.02095	0.104401	no	3.37275
GRAMD2	GRAMD2	GRAMD2	chr15:72452146-72490136	ctrl	dox	OK	0.0917769	1.04052	3.50303	3.09819	0.0004	0.00458914	yes	3.36762
KDF1	KDF1	KDF1	chr1:27276046-27286901	ctrl	dox	OK	0.0190211	0.288411	3.92245	1.62379	0.25285	0.521454	no	3.36213
ARHGEF16	ARHGEF16	ARHGEF16	chr1:3371146-3397677	ctrl	dox	OK	0.29497	3.12147	3.40358	4.01075	5e-05	0.000758876	yes	3.3601
ZNF503-AS1	ZNF503-AS1	ZNF503-AS1	chr10:77056140-77121436	ctrl	dox	OK	0	0.0926482	inf	#NAME?	0.00015	0.001995	yes	3.35964
ALOXE3	ALOXE3	ALOXE3	chr17:7999217-8022234	ctrl	dox	OK	0	0.0926424	inf	#NAME?	5e-05	0.000758876	yes	3.35955
DTX1	DTX1	DTX1	chr12:113495661-113535833	ctrl	dox	OK	0.0102698	0.197877	4.26812	1.77815	0.25285	0.521454	no	3.35833
CDK18	CDK18	CDK18	chr1:205473683-205501921	ctrl	dox	OK	1.68616	17.3849	3.36602	5.79489	5e-05	0.000758876	yes	3.35832
RIPK3	RIPK3	RIPK3	chr14:24805226-24809242	ctrl	dox	OK	0	0.0924788	inf	#NAME?	0.0002	0.00255224	yes	3.35725
LINC00661	LINC00661	LINC00661	chr19:16126443-16138272	ctrl	dox	OK	0	0.0923113	inf	#NAME?	5e-05	0.000758876	yes	3.35489
CILP2	CILP2	CILP2	chr19:19649073-19657468	ctrl	dox	OK	0.0690537	0.798611	3.5317	3.20402	0.0002	0.00255224	yes	3.35454
HSPA6	HSPA6	HSPA6	chr1:161494035-161496687	ctrl	dox	OK	2.24097	22.9885	3.35872	6.06337	5e-05	0.000758876	yes	3.35292
OR2L8	OR2L8	OR2L8	chr1:248100492-248264224	ctrl	dox	OK	0	0.0919553	inf	#NAME?	0.2318	0.503182	no	3.34986
FOXJ1	FOXJ1	FOXJ1	chr17:74132414-74236390	ctrl	dox	OK	0.0261944	0.358855	3.77607	0.675879	0.2814	0.552854	no	3.34922
ECRP	ECRP	ECRP	chr14:21387499-21388335	ctrl	dox	OK	0	0.0918905	inf	#NAME?	0.12685	0.357157	no	3.34895
SYNPO2L	SYNPO2L	SYNPO2L	chr10:75404638-75415863	ctrl	dox	OK	0.0755365	0.861327	3.51131	3.28668	5e-05	0.000758876	yes	3.3486
HTRA3	HTRA3	HTRA3	chr4:8271488-8308838	ctrl	dox	OK	0.0592861	0.694631	3.55048	2.46851	0.0044	0.0313003	yes	3.34623
SERPINA2	SERPINA2	SERPINA2	chr14:94829974-94833039	ctrl	dox	OK	0	0.0915768	inf	#NAME?	0.00185	0.0159084	yes	3.3445
MATN1	MATN1	MATN1	chr1:31184123-31199593	ctrl	dox	OK	0.0743407	0.846417	3.50914	1.81436	0.12015	0.348175	no	3.34401
SYCE3	SYCE3	SYCE3	chr22:50989540-51001328	ctrl	dox	OK	0	0.0914674	inf	#NAME?	0.1226	0.35097	no	3.34294
NPR2	NPR2	NPR2	chr9:35792405-35812259	ctrl	dox	OK	0.0324769	0.420039	3.69304	1.8638	0.0459	0.18437	no	3.33972
IGFBP2	IGFBP2	IGFBP2	chr2:217498126-217529158	ctrl	dox	OK	3.7085	37.4614	3.3365	5.30866	5e-05	0.000758876	yes	3.333
AQP3	AQP3	AQP3	chr9:33441151-33447631	ctrl	dox	OK	0.438083	4.50493	3.36223	3.54702	5e-05	0.000758876	yes	3.33287
CISH	CISH	CISH	chr3:50643884-50649262	ctrl	dox	OK	0.142993	1.53029	3.41978	2.98072	0.0002	0.00255224	yes	3.33166
ANKRD36BP2	ANKRD36BP2	ANKRD36BP2	chr2:89065418-89106109	ctrl	dox	OK	0	0.0904827	inf	#NAME?	0.0013	0.0119639	yes	3.32888
TGM5	TGM5	TGM5	chr15:43524792-43559055	ctrl	dox	OK	0.137049	1.4662	3.41932	3.1408	5e-05	0.000758876	yes	3.32752
SYNGR3	SYNGR3	SYNGR3	chr16:2039945-2044276	ctrl	dox	OK	0.300979	3.1115	3.36988	3.62021	5e-05	0.000758876	yes	3.32735
HMCN2	HMCN2	HMCN2	chr9:133028157-133309510	ctrl	dox	OK	0.00124385	0.10283	6.36931	1.42543	0.17165	0.42469	no	3.32694
FGR	FGR	FGR	chr1:27938800-27961727	ctrl	dox	OK	0	0.0903043	inf	#NAME?	5e-05	0.000758876	yes	3.32631
DUOX1	DUOX1	DUOX1	chr15:45422191-45457776	ctrl	dox	OK	0.0596404	0.687409	3.52681	3.26081	0.00035	0.00411812	yes	3.32401
DMKN	DMKN	DMKN	chr19:35988118-36004560	ctrl	dox	OK	0.247522	2.55983	3.37042	2.32746	5e-05	0.000758876	yes	3.31891
C7orf61	C7orf61	C7orf61	chr7:100054237-100061894	ctrl	dox	OK	0.0794093	0.881578	3.47271	2.0734	0.0226	0.110357	no	3.31786
FRRS1L	FRRS1L	FRRS1L	chr9:111899580-111929571	ctrl	dox	OK	0	0.0896984	inf	#NAME?	0.0082	0.0510687	no	3.31757
LINC01353	LINC01353	LINC01353	chr1:203256279-203257924	ctrl	dox	OK	0	0.0896444	inf	#NAME?	0.12465	0.35399	no	3.31679
SGK2	SGK2	SGK2	chr20:42187634-42214273	ctrl	dox	OK	0.274311	2.82005	3.36184	3.34991	5e-05	0.000758876	yes	3.31529
RNF112	RNF112	RNF112	chr17:19314490-19320589	ctrl	dox	OK	0.0164623	0.253398	3.94417	1.88508	0.0026	0.0209435	yes	3.31523
AJAP1	AJAP1	AJAP1	chr1:4715104-4843851	ctrl	dox	OK	0	0.0895354	inf	#NAME?	5e-05	0.000758876	yes	3.31521
LOC149373	LOC149373	LOC149373	chr1:231298673-231357314	ctrl	dox	OK	0	0.0895231	inf	#NAME?	0.2419	0.513516	no	3.31503
INSC	INSC	INSC	chr11:15133969-15268756	ctrl	dox	OK	0.219388	2.27075	3.37161	3.53408	5e-05	0.000758876	yes	3.31365
LEFTY1	LEFTY1	LEFTY1	chr1:226073981-226076846	ctrl	dox	OK	0	0.0893786	inf	#NAME?	0.0005	0.00552122	yes	3.31294
CYP2W1	CYP2W1	CYP2W1	chr7:1022834-1029276	ctrl	dox	OK	0.00888514	0.177655	4.32154	1.0538	0.1718	0.424769	no	3.31276
LOC100288866	LOC100288866	LOC100288866	chr17:47572654-47651426	ctrl	dox	OK	5.91448	58.6551	3.30993	1.21621	0.39955	0.672282	no	3.30774
LINC00609	LINC00609	LINC00609	chr14:36539632-36645857	ctrl	dox	OK	0	0.0886283	inf	#NAME?	0.23515	0.506007	no	3.302
FCN2	FCN2	FCN2	chr9:137772657-137779366	ctrl	dox	OK	0	0.0885141	inf	#NAME?	0.1216	0.349892	no	3.30033
GHRHR	GHRHR	GHRHR	chr7:31003635-31019146	ctrl	dox	OK	0	0.0884994	inf	#NAME?	0.002	0.0169467	yes	3.30011
FBLN1	FBLN1	FBLN1	chr22:45898718-45997014	ctrl	dox	OK	0.191737	1.97617	3.3655	3.14365	5e-05	0.000758876	yes	3.29944
HLA-DOB	HLA-DOB	HLA-DOB	chr6_ssto_hap7:4211472-4215758	ctrl	dox	OK	0.0881844	0.955773	3.43807	1.99461	0.0231	0.112007	no	3.29812
KLK12	KLK12	KLK12	chr19:51532347-51538148	ctrl	dox	OK	0	0.0883095	inf	#NAME?	0.0812	0.270994	no	3.29733
DCSTAMP	DCSTAMP	DCSTAMP	chr8:105352023-105368917	ctrl	dox	OK	0.289443	2.93368	3.34136	2.86472	0.0005	0.00552122	yes	3.29727
ZMIZ1-AS1	ZMIZ1-AS1	ZMIZ1-AS1	chr10:80703082-80827205	ctrl	dox	OK	0.102264	1.09324	3.41824	2.4066	0.0759	0.259183	no	3.29678
AS3MT	AS3MT	AS3MT	chr10:104613966-104661655	ctrl	dox	OK	0.191558	1.97014	3.36245	1.11752	0.2596	0.529552	no	3.29634
OTUD6A	OTUD6A	OTUD6A	chrX:69282340-69284029	ctrl	dox	OK	0.0809162	0.880881	3.44445	2.7328	0.00315	0.0242012	yes	3.29262
PNMT	PNMT	PNMT	chr17:37824233-37826728	ctrl	dox	OK	0.0648516	0.723439	3.47966	1.29936	0.24965	0.51975	no	3.29257
LOC149950	LOC149950	LOC149950	chr20:31175280-31196694	ctrl	dox	OK	0	0.0876913	inf	#NAME?	0.0143	0.0787597	no	3.28823
C6orf132	C6orf132	C6orf132	chr6:42068856-42110715	ctrl	dox	OK	0	0.0874567	inf	#NAME?	5e-05	0.000758876	yes	3.28476
SMTNL2	SMTNL2	SMTNL2	chr17:4487275-4511614	ctrl	dox	OK	0	0.0874544	inf	#NAME?	0.1179	0.344491	no	3.28473
PRDM1	PRDM1	PRDM1	chr6:106534194-106557814	ctrl	dox	OK	0.0710365	0.776797	3.45091	3.06162	0.0001	0.00140493	yes	3.27935
FGF3	FGF3	FGF3	chr11:69624735-69634192	ctrl	dox	OK	0.014559	0.228135	3.9699	1.01966	0.17175	0.424703	no	3.27746
CELP	CELP	CELP	chr9:135957925-135962478	ctrl	dox	OK	0	0.0866977	inf	#NAME?	0.0081	0.0506039	no	3.27348
NCF2	NCF2	NCF2	chr1:183524696-183560056	ctrl	dox	OK	0.154662	1.57946	3.35224	2.97534	5e-05	0.000758876	yes	3.27096
HHIPL2	HHIPL2	HHIPL2	chr1:222695601-222721444	ctrl	dox	OK	0.573293	5.61865	3.29288	3.85263	5e-05	0.000758876	yes	3.2705
PAQR5	PAQR5	PAQR5	chr15:69591293-69699976	ctrl	dox	OK	0.770027	7.51204	3.28622	4.99345	5e-05	0.000758876	yes	3.26953
ST8SIA5	ST8SIA5	ST8SIA5	chr18:44259080-44337039	ctrl	dox	OK	0	0.0863135	inf	#NAME?	5e-05	0.000758876	yes	3.26774
TMEM210	TMEM210	TMEM210	chr9:140065379-140066498	ctrl	dox	OK	0	0.0862206	inf	#NAME?	0.07235	0.250587	no	3.26635
TUBB2B	TUBB2B	TUBB2B	chr6:3224494-3227968	ctrl	dox	OK	7.52794	72.5112	3.26788	7.56795	5e-05	0.000758876	yes	3.26616
ACAP1	ACAP1	ACAP1	chr17:7239847-7254793	ctrl	dox	OK	0.148452	1.5142	3.35048	3.17194	0.00015	0.001995	yes	3.26593
TNFRSF10A	TNFRSF10A	TNFRSF10A	chr8:23048969-23082680	ctrl	dox	OK	0.203145	2.0359	3.32508	3.21723	0.0001	0.00140493	yes	3.26283
PDIA2	PDIA2	PDIA2	chr16:333117-337209	ctrl	dox	OK	0.0126137	0.206395	4.03234	0.983565	0.1556	0.402765	no	3.2584
DNAI2	DNAI2	DNAI2	chr17:72270385-72311023	ctrl	dox	OK	0	0.0856263	inf	#NAME?	5e-05	0.000758876	yes	3.25741
LYPD4	LYPD4	LYPD4	chr19:42341147-42348736	ctrl	dox	OK	0	0.0855544	inf	#NAME?	0.10355	0.3182	no	3.25632
NPC1L1	NPC1L1	NPC1L1	chr7:44552134-44580914	ctrl	dox	OK	0.00448922	0.12834	4.83736	0.896617	0.23345	0.504937	no	3.25517
LOC101928737	LOC101928737	LOC101928737	chr16:87527792-87549236	ctrl	dox	OK	0	0.0854323	inf	#NAME?	0.07235	0.250587	no	3.25448
RRAD	RRAD	RRAD	chr16:66955581-66959439	ctrl	dox	OK	0.88799	8.54505	3.26647	3.51319	5e-05	0.000758876	yes	3.25201
CYS1	CYS1	CYS1	chr2:10196925-10220538	ctrl	dox	OK	0.0131134	0.210191	4.00258	1.70979	0.2488	0.51902	no	3.25195
EMX1	EMX1	EMX1	chr2:73144603-73162020	ctrl	dox	OK	0	0.0850251	inf	#NAME?	5e-05	0.000758876	yes	3.24831
KRTAP5-2	KRTAP5-2	KRTAP5-2	chr11:1593970-1620414	ctrl	dox	OK	0.0883866	0.924719	3.38712	1.87305	0.0222	0.108997	no	3.248
C3	C3	C3	chr19:6677845-6720662	ctrl	dox	OK	0.049574	0.555782	3.48686	2.60974	0.00015	0.001995	yes	3.24749
APOBR	APOBR	APOBR	chr16:28505969-28510291	ctrl	dox	OK	0.0121572	0.200262	4.042	1.84217	0.0473	0.18756	no	3.24634
GPR35	GPR35	GPR35	chr2:241544824-241570676	ctrl	dox	OK	0.0618135	0.671184	3.44072	1.71732	0.18545	0.443672	no	3.24572
TRPV4	TRPV4	TRPV4	chr12:110220891-110271241	ctrl	dox	OK	2.79333	26.5345	3.24781	6.49061	5e-05	0.000758876	yes	3.2432
SPIB	SPIB	SPIB	chr19:50922194-50934309	ctrl	dox	OK	0.0420645	0.482881	3.52099	1.90397	0.12895	0.36137	no	3.24287
TTBK1	TTBK1	TTBK1	chr6:43211221-43255997	ctrl	dox	OK	0.00616211	0.142929	4.53573	1.93543	0.00265	0.0212225	yes	3.24217
SPARCL1	SPARCL1	SPARCL1	chr4:88394481-88450655	ctrl	dox	OK	0	0.0844649	inf	#NAME?	5e-05	0.000758876	yes	3.23978
RBP7	RBP7	RBP7	chr1:10057254-10076078	ctrl	dox	OK	0	0.0844643	inf	#NAME?	0.0478	0.188585	no	3.23977
TMC6	TMC6	TMC6	chr17:76108998-76139049	ctrl	dox	OK	3.66369	34.6808	3.24277	6.73498	5e-05	0.000758876	yes	3.23925
CACNA1B	CACNA1B	CACNA1B	chr9:140772240-141019076	ctrl	dox	OK	0.00826292	0.162407	4.29682	2.02653	0.2478	0.518496	no	3.23883
LOXHD1	LOXHD1	LOXHD1	chr18:44056934-44236996	ctrl	dox	OK	0	0.0842471	inf	#NAME?	5e-05	0.000758876	yes	3.23645
C1QTNF8	C1QTNF8	C1QTNF8	chr16:1138225-1146244	ctrl	dox	OK	0	0.0842255	inf	#NAME?	5e-05	0.000758876	yes	3.23612
2016-03-10	2016-03-10	2016-03-10	chr17:60778674-61505067	ctrl	dox	OK	0.0221948	0.293329	3.72423	0.732106	0.0615	0.22462	no	3.23598
SH2D3C	SH2D3C	SH2D3C	chr9:130500595-130541048	ctrl	dox	OK	0.115631	1.17305	3.34267	2.09733	0.054	0.205461	no	3.23525
KDM6B	KDM6B	KDM6B	chr17:7743234-7758118	ctrl	dox	OK	0.14655	1.46359	3.32005	3.95213	5e-05	0.000758876	yes	3.23464
SPATA22	SPATA22	SPATA22	chr17:3343305-3375142	ctrl	dox	OK	0	0.0839279	inf	#NAME?	0.02795	0.128678	no	3.23155
EGR1	EGR1	EGR1	chr5:137801180-137805004	ctrl	dox	OK	0.640503	6.09034	3.24924	4.50617	5e-05	0.000758876	yes	3.22926
TMEM61	TMEM61	TMEM61	chr1:55446464-55457966	ctrl	dox	OK	0.041312	0.470602	3.50987	1.64985	0.1318	0.36627	no	3.22747
PADI2	PADI2	PADI2	chr1:17393255-17445948	ctrl	dox	OK	0.00755099	0.154175	4.35176	1.63006	0.24545	0.517365	no	3.22561
LOC101929698	LOC101929698	LOC101929698	chr20:31030861-31172875	ctrl	dox	OK	0	0.0833749	inf	#NAME?	0.15415	0.401416	no	3.22303
LOC400794	LOC400794	LOC400794	chr1:165446078-165551341	ctrl	dox	OK	0.0203314	0.272556	3.74477	1.45	0.1238	0.35283	no	3.21965
TREM1	TREM1	TREM1	chr6:41242998-41254457	ctrl	dox	OK	0	0.0829445	inf	#NAME?	0.00045	0.00505616	yes	3.21637
SERPINB9P1	SERPINB9P1	SERPINB9P1	chr6:2854890-2876744	ctrl	dox	OK	0.0153237	0.225258	3.87774	0.83924	0.1407	0.380233	no	3.21568
B4GALNT2	B4GALNT2	B4GALNT2	chr17:47209821-47247351	ctrl	dox	OK	0.0110022	0.184685	4.0692	0.550914	0.4921	0.746759	no	3.21253
CCDC135	CCDC135	CCDC135	chr16:57728712-57765367	ctrl	dox	OK	0.0450968	0.499204	3.46853	1.98237	0.07715	0.262205	no	3.2082
PLXNA4	PLXNA4	PLXNA4	chr7:131808090-132333447	ctrl	dox	OK	0.00156664	0.0967893	5.9491	0.182179	0.25005	0.519876	no	3.20673
GPR133	GPR133	GPR133	chr12:131438451-131626008	ctrl	dox	OK	0.119095	1.1814	3.31031	3.63301	5e-05	0.000758876	yes	3.20615
NEURL3	NEURL3	NEURL3	chr2:97163379-97173846	ctrl	dox	OK	0.217505	2.08942	3.26398	2.92726	0.00015	0.001995	yes	3.20602
LOC389602	LOC389602	LOC389602	chr7:155755325-155759037	ctrl	dox	OK	0.144855	1.41767	3.29084	2.8409	0.0004	0.00458914	yes	3.20467
HAPLN2	HAPLN2	HAPLN2	chr1:156589085-156595517	ctrl	dox	OK	0	0.0820819	inf	#NAME?	0.001	0.00966882	yes	3.20292
LGR6	LGR6	LGR6	chr1:202163117-202288889	ctrl	dox	OK	0.10528	1.05016	3.31831	2.67786	0.0001	0.00140493	yes	3.20107
GAL3ST2	GAL3ST2	GAL3ST2	chr2:242716239-242743702	ctrl	dox	OK	0	0.0819542	inf	#NAME?	0.0012	0.0112102	yes	3.20092
TH	TH	TH	chr11:2185158-2193035	ctrl	dox	OK	0.0117544	0.18989	4.01389	0.570214	0.24905	0.519421	no	3.19983
PLB1	PLB1	PLB1	chr2:28718937-28866653	ctrl	dox	OK	0.692018	6.4298	3.21589	5.22451	5e-05	0.000758876	yes	3.19744
LOC101926975	LOC101926975	LOC101926975	chr5:142125164-142140558	ctrl	dox	OK	0.0285782	0.343783	3.58851	1.89038	0.24795	0.518496	no	3.19701
FOXC2	FOXC2	FOXC2	chr16:86600856-86602537	ctrl	dox	OK	0.0088964	0.163132	4.19667	0.767609	0.1406	0.380077	no	3.19569
WFDC2	WFDC2	WFDC2	chr20:44098393-44110172	ctrl	dox	OK	1.37562	12.6775	3.20411	3.49619	5e-05	0.000758876	yes	3.1948
SMOC1	SMOC1	SMOC1	chr14:70346113-70499083	ctrl	dox	OK	0.461912	4.30951	3.22183	3.26535	0.00015	0.001995	yes	3.19428
PSORS1C2	PSORS1C2	PSORS1C2	chr6_qbl_hap6:2378425-2403713	ctrl	dox	OK	0	0.0813902	inf	#NAME?	0.20445	0.468945	no	3.19204
LINC01273	LINC01273	LINC01273	chr20:48789106-48793208	ctrl	dox	OK	0	0.0808941	inf	#NAME?	0.0478	0.188585	no	3.18419
LOC101929633	LOC101929633	LOC101929633	chr2:165536694-165705906	ctrl	dox	OK	0	0.0808212	inf	#NAME?	0.22325	0.493409	no	3.18303
MMRN2	MMRN2	MMRN2	chr10:88695297-88717425	ctrl	dox	OK	0.0515965	0.549235	3.41208	2.94382	0.0012	0.0112102	yes	3.18253
MPPED1	MPPED1	MPPED1	chr22:43808019-43902800	ctrl	dox	OK	0	0.080769	inf	#NAME?	0.0001	0.00140493	yes	3.1822
TNS4	TNS4	TNS4	chr17:38632079-38657854	ctrl	dox	OK	0.00352615	0.112433	4.99483	0.903779	0.1404	0.37988	no	3.17817
ITIH6	ITIH6	ITIH6	chrX:54775331-54824673	ctrl	dox	OK	2.32948	21.1608	3.18331	6.37157	5e-05	0.000758876	yes	3.17782
LINC00880	LINC00880	LINC00880	chr3:156799455-156840791	ctrl	dox	OK	0.1388	1.33611	3.26696	2.69574	0.00095	0.00928033	yes	3.17735
PERM1	PERM1	PERM1	chr1:910578-917497	ctrl	dox	OK	0.0281217	0.334527	3.57237	2.04944	0.00395	0.0287717	yes	3.17593
SLC6A19	SLC6A19	SLC6A19	chr5:1201709-1225230	ctrl	dox	OK	0	0.0802698	inf	#NAME?	5e-05	0.000758876	yes	3.17424
ATP1A2	ATP1A2	ATP1A2	chr1:160085519-160113374	ctrl	dox	OK	0.00997582	0.170232	4.09293	1.93572	0.051	0.196799	no	3.17353
OR13C3	OR13C3	OR13C3	chr9:107298050-107299094	ctrl	dox	NOTEST	0	0.0801872	inf	0	1	1	no	3.17292
SLC22A11	SLC22A11	SLC22A11	chr11:64323097-64338999	ctrl	dox	OK	0	0.0801105	inf	#NAME?	5e-05	0.000758876	yes	3.1717
LKAAEAR1	LKAAEAR1	LKAAEAR1	chr20:62711470-62731996	ctrl	dox	OK	0.323287	2.98207	3.20543	1.42992	0.10345	0.318056	no	3.16631
TLDC2	TLDC2	TLDC2	chr20:35504569-35580246	ctrl	dox	OK	0.0308576	0.356672	3.5309	0.547175	0.2528	0.521454	no	3.16581
LCNL1	LCNL1	LCNL1	chr9:139877444-139880210	ctrl	dox	OK	0	0.0796885	inf	#NAME?	0.00185	0.0159084	yes	3.16492
EFNA1	EFNA1	EFNA1	chr1:155100348-155107386	ctrl	dox	OK	3.96583	35.6124	3.16668	5.13841	5e-05	0.000758876	yes	3.16346
CLIC6	CLIC6	CLIC6	chr21:36041687-36090519	ctrl	dox	OK	0.0376847	0.417016	3.46805	2.31941	0.0063	0.0415259	yes	3.16269
NUAK2	NUAK2	NUAK2	chr1:205271190-205290883	ctrl	dox	OK	0.358205	3.28028	3.19496	3.8599	5e-05	0.000758876	yes	3.15963
CD300LB	CD300LB	CD300LB	chr17:72517312-72527613	ctrl	dox	OK	0.00705063	0.142284	4.33488	0.843738	0.1404	0.37988	no	3.15887
BTBD11	BTBD11	BTBD11	chr12:107712196-108053419	ctrl	dox	OK	0.0118883	0.185342	3.96258	1.67772	0.2173	0.486183	no	3.15777
ITGAD	ITGAD	ITGAD	chr16:31404632-31437826	ctrl	dox	OK	0	0.0791634	inf	#NAME?	5e-05	0.000758876	yes	3.15645
KIR2DL4	KIR2DL4	KIR2DL4	chr19_gl000209_random:21904-129563	ctrl	dox	OK	0	0.079107	inf	#NAME?	0.1247	0.35399	no	3.15554
RTL1	RTL1	RTL1	chr14:101346991-101351184	ctrl	dox	OK	0	0.0790784	inf	#NAME?	5e-05	0.000758876	yes	3.15508
WNK2	WNK2	WNK2	chr9:95947211-96108696	ctrl	dox	OK	0	0.0790484	inf	#NAME?	5e-05	0.000758876	yes	3.15459
IGF2-AS	IGF2-AS	IGF2-AS	chr11:2150341-2182439	ctrl	dox	OK	0	0.0790182	inf	#NAME?	0.1098	0.330283	no	3.1541
TSKS	TSKS	TSKS	chr19:50243010-50266515	ctrl	dox	OK	0	0.0789559	inf	#NAME?	0.0004	0.00458914	yes	3.15309
LINC00304	LINC00304	LINC00304	chr16:89225627-89230083	ctrl	dox	OK	0.0175827	0.235322	3.74241	1.61957	0.13175	0.366244	no	3.15284
LOC100505942	LOC100505942	LOC100505942	chr16:67551608-67562648	ctrl	dox	OK	0.127791	1.21412	3.24805	2.25251	0.0055	0.0373638	yes	3.15119
MYBPC3	MYBPC3	MYBPC3	chr11:47352956-47374253	ctrl	dox	OK	0	0.0788013	inf	#NAME?	5e-05	0.000758876	yes	3.15058
RAX2	RAX2	RAX2	chr19:3769088-3772219	ctrl	dox	OK	0	0.0787101	inf	#NAME?	0.00035	0.00411812	yes	3.1491
LOC101928597	LOC101928597	LOC101928597	chrUn_gl000223:68856-73418	ctrl	dox	OK	0	0.0786352	inf	#NAME?	0.01295	0.0730956	no	3.14788
NGFR	NGFR	NGFR	chr17:47572654-47651426	ctrl	dox	OK	85.4708	756.511	3.14586	8.01161	5e-05	0.000758876	yes	3.14571
GAB4	GAB4	GAB4	chr22:17442826-17489112	ctrl	dox	OK	0	0.0783046	inf	#NAME?	5e-05	0.000758876	yes	3.14249
DGCR5	DGCR5	DGCR5	chr22:18958010-19018755	ctrl	dox	OK	0.012132	0.185431	3.93399	0.632845	0.0325	0.143693	no	3.14245
NAT8B	NAT8B	NAT8B	chr2:73927635-73928467	ctrl	dox	OK	0	0.0781693	inf	#NAME?	0.02935	0.133176	no	3.14028
C1orf194	C1orf194	C1orf194	chr1:109648572-109656479	ctrl	dox	OK	0	0.0781413	inf	#NAME?	0.0304	0.136492	no	3.13982
ODF3L1	ODF3L1	ODF3L1	chr15:76016318-76032418	ctrl	dox	OK	0.0533139	0.547858	3.36122	1.37773	0.111	0.332206	no	3.1393
CALHM3	CALHM3	CALHM3	chr10:105232560-105238997	ctrl	dox	OK	0.115461	1.095	3.24545	2.5341	0.0033	0.0251279	yes	3.13874
TNNI1	TNNI1	TNNI1	chr1:201372894-201390874	ctrl	dox	OK	0.0123286	0.186538	3.91938	2.35384	0.0223	0.109338	no	3.13784
CABP4	CABP4	CABP4	chr11:67222817-67229245	ctrl	dox	OK	0.0128887	0.191328	3.89187	1.81812	0.051	0.196799	no	3.13684
KIAA1045	KIAA1045	KIAA1045	chr9:34958191-34982541	ctrl	dox	OK	0.0713733	0.704983	3.30413	3.35547	5e-05	0.000758876	yes	3.13528
SIRPG	SIRPG	SIRPG	chr20:1609797-1638425	ctrl	dox	OK	0	0.077786	inf	#NAME?	0.19435	0.455555	no	3.13399
LOC154449	LOC154449	LOC154449	chr6:170563421-170571657	ctrl	dox	OK	0	0.0777834	inf	#NAME?	0.00345	0.0259618	yes	3.13395
C8orf12	C8orf12	C8orf12	chr8:11197145-11324276	ctrl	dox	OK	0	0.0777307	inf	#NAME?	0.16135	0.411044	no	3.13308
ATP11A-AS1	ATP11A-AS1	ATP11A-AS1	chr13:113344642-113541482	ctrl	dox	OK	0	0.0776224	inf	#NAME?	0.0496	0.19314	no	3.1313
PTK6	PTK6	PTK6	chr20:62159775-62168723	ctrl	dox	OK	0.0389587	0.418987	3.42689	2.14571	0.00405	0.0293572	yes	3.1313
PITX1	PITX1	PITX1	chr5:134363423-134735577	ctrl	dox	OK	0.0400011	0.427022	3.4162	0.232876	0.2166	0.485343	no	3.12767
LST1	LST1	LST1	chr6_ssto_hap7:2884757-2891563	ctrl	dox	OK	0.0406508	0.432561	3.41155	0.322426	0.2268	0.497945	no	3.12722
COL9A2	COL9A2	COL9A2	chr1:40766162-40782939	ctrl	dox	OK	2.82526	24.7119	3.12875	6.6177	5e-05	0.000758876	yes	3.12424
STRA8	STRA8	STRA8	chr7:134916730-134943244	ctrl	dox	OK	0	0.0767181	inf	#NAME?	0.0332	0.145747	no	3.11633
H1FOO	H1FOO	H1FOO	chr3:129262056-129270204	ctrl	dox	OK	0	0.0766825	inf	#NAME?	0.0027	0.0215556	yes	3.11574
LINC00935	LINC00935	LINC00935	chr12:49121217-49159569	ctrl	dox	OK	0	0.0766217	inf	#NAME?	0.1211	0.349237	no	3.11473
FLNC	FLNC	FLNC	chr7:128470482-128499328	ctrl	dox	OK	1.52775	13.2859	3.12041	6.61188	5e-05	0.000758876	yes	3.11209
OSM	OSM	OSM	chr22:30658818-30662829	ctrl	dox	OK	0	0.0763747	inf	#NAME?	0.001	0.00966882	yes	3.11061
ADIG	ADIG	ADIG	chr20:37209837-37217104	ctrl	dox	OK	0.0760225	0.732658	3.26864	1.44094	0.0849	0.27919	no	3.10991
KCNK12	KCNK12	KCNK12	chr2:47747914-47797470	ctrl	dox	OK	0	0.0762954	inf	#NAME?	0.00645	0.0422355	yes	3.10928
KRT19	KRT19	KRT19	chr17:39679868-39684641	ctrl	dox	OK	1.01232	8.80603	3.12083	3.76115	5e-05	0.000758876	yes	3.10828
LTA	LTA	LTA	chr6_ssto_hap7:2870676-2872901	ctrl	dox	OK	0	0.0761852	inf	#NAME?	0.1272	0.357891	no	3.10744
TINAGL1	TINAGL1	TINAGL1	chr1:32042085-32053287	ctrl	dox	OK	15.2912	131.769	3.10723	8.12941	5e-05	0.000758876	yes	3.1064
PDE4C	PDE4C	PDE4C	chr19:18318770-18359010	ctrl	dox	OK	0.0362631	0.387718	3.41843	2.50825	0.00015	0.001995	yes	3.10381
BIN2	BIN2	BIN2	chr12:51674821-51718464	ctrl	dox	OK	0.112611	1.0432	3.2116	2.3633	0.0003	0.00361996	yes	3.10262
SERPINF2	SERPINF2	SERPINF2	chr17:1646129-1658559	ctrl	dox	OK	0.0704954	0.681077	3.27222	2.03612	0.0006	0.00643164	yes	3.10187
CCR10	CCR10	CCR10	chr17:40831419-40833845	ctrl	dox	OK	0.0902647	0.850468	3.23602	2.23661	0.0114	0.0663276	no	3.10131
KLHL4	KLHL4	KLHL4	chrX:86772714-86925050	ctrl	dox	OK	0.669942	5.82349	3.11977	3.41716	5e-05	0.000758876	yes	3.10088
MAP1LC3A	MAP1LC3A	MAP1LC3A	chr20:33134687-33148149	ctrl	dox	OK	1.08838	9.38711	3.1085	3.54772	5e-05	0.000758876	yes	3.09684
ZC3H12D	ZC3H12D	ZC3H12D	chr6:149768765-149806148	ctrl	dox	OK	0	0.075545	inf	#NAME?	5e-05	0.000758876	yes	3.09668
DKFZP434A062	DKFZP434A062	DKFZP434A062	chr9:139216997-139221779	ctrl	dox	OK	0	0.0755264	inf	#NAME?	5e-05	0.000758876	yes	3.09637
ALMS1P	ALMS1P	ALMS1P	chr2:73872045-73912694	ctrl	dox	OK	0.138441	1.25885	3.18476	2.69268	0.0008	0.00807874	yes	3.09556
EFCC1	EFCC1	EFCC1	chr3:128720471-128759585	ctrl	dox	OK	0.00726384	0.137305	4.2405	0.969577	0.15555	0.402765	no	3.09298
UNC5A	UNC5A	UNC5A	chr5:176237559-176326333	ctrl	dox	OK	0	0.0753069	inf	#NAME?	0.092	0.294292	no	3.09266
CLC	CLC	CLC	chr19:40221892-40228669	ctrl	dox	OK	0	0.075273	inf	#NAME?	0.07235	0.250587	no	3.09209
BLK	BLK	BLK	chr8:11351520-11422108	ctrl	dox	OK	0.0991631	0.92055	3.21462	2.74386	0.00065	0.00685708	yes	3.0916
LOC442497	LOC442497	LOC442497	chr7:419390-422845	ctrl	dox	OK	0	0.0752225	inf	#NAME?	5e-05	0.000758876	yes	3.09123
OVOL1-AS1	OVOL1-AS1	OVOL1-AS1	chr11:65554504-65564690	ctrl	dox	OK	0	0.0752183	inf	#NAME?	0.1215	0.349717	no	3.09116
MGAT3	MGAT3	MGAT3	chr22:39853324-39888199	ctrl	dox	OK	0.03799	0.398407	3.39055	2.58503	0.00105	0.0100871	yes	3.0892
TNNC2	TNNC2	TNNC2	chr20:44451854-44455953	ctrl	dox	OK	0.134034	1.21516	3.18047	2.01158	0.0167	0.0885815	no	3.08849
P2RY2	P2RY2	P2RY2	chr11:72929342-72953472	ctrl	dox	OK	0.014889	0.201661	3.75961	2.25393	0.0025	0.0203111	yes	3.08818
VAV1	VAV1	VAV1	chr19:6772678-6857377	ctrl	dox	OK	0.0570688	0.559737	3.29397	2.38895	0.00065	0.00685708	yes	3.08658
DLX3	DLX3	DLX3	chr17:48067368-48072588	ctrl	dox	OK	0.105813	0.97334	3.20143	2.29014	0.00475	0.033263	yes	3.08589
CCL25	CCL25	CCL25	chr19:8117645-8127547	ctrl	dox	OK	0	0.0748374	inf	#NAME?	0.1209	0.348997	no	3.0847
FAM212B-AS1	FAM212B-AS1	FAM212B-AS1	chr1:112264685-112310199	ctrl	dox	OK	0.143139	1.28828	3.16996	0.601334	0.09295	0.296222	no	3.08369
GALNT16	GALNT16	GALNT16	chr14:69726680-69821190	ctrl	dox	OK	0.00484052	0.115794	4.58026	0.692167	0.2157	0.484345	no	3.08345
AADACL2-AS1	AADACL2-AS1	AADACL2-AS1	chr3:151347319-151645963	ctrl	dox	OK	0	0.0747188	inf	#NAME?	0.0905	0.291519	no	3.08268
THEM5	THEM5	THEM5	chr1:151819576-151826173	ctrl	dox	OK	0.057673	0.562405	3.28564	1.61355	0.047	0.1867	no	3.08038
PLK5	PLK5	PLK5	chr19:1524072-1535455	ctrl	dox	OK	0	0.0745732	inf	#NAME?	0.00055	0.00600319	yes	3.0802
SEMA3G	SEMA3G	SEMA3G	chr3:52467267-52479043	ctrl	dox	OK	0.319979	2.7798	3.11893	4.1211	5e-05	0.000758876	yes	3.07972
MORN3	MORN3	MORN3	chr12:122089292-122107560	ctrl	dox	OK	0.0358127	0.377002	3.39603	1.53763	0.1239	0.352947	no	3.07852
C1orf229	C1orf229	C1orf229	chr1:247273461-247275719	ctrl	dox	OK	0.0953234	0.87835	3.20389	2.6916	0.0016	0.0141308	yes	3.0763
GJA4	GJA4	GJA4	chr1:35258598-35261348	ctrl	dox	OK	0.012787	0.18199	3.83112	0.906175	0.1556	0.402765	no	3.07475
DOK7	DOK7	DOK7	chr4:3465032-3496209	ctrl	dox	OK	0.385156	3.31765	3.10665	3.7565	5e-05	0.000758876	yes	3.07401
SLC5A8	SLC5A8	SLC5A8	chr12:101549993-101604016	ctrl	dox	OK	0	0.0741813	inf	#NAME?	0.005	0.0345954	yes	3.0735
CMA1	CMA1	CMA1	chr14:24974711-24977471	ctrl	dox	OK	0.0276151	0.306509	3.4724	0.83708	0.1563	0.403561	no	3.07286
NLRP13	NLRP13	NLRP13	chr19:56407310-56443702	ctrl	dox	OK	0	0.0740678	inf	#NAME?	0.00015	0.001995	yes	3.07155
OR8B3	OR8B3	OR8B3	chr11:124266305-124267247	ctrl	dox	NOTEST	0	0.0739405	inf	0	1	1	no	3.06937
SPON2	SPON2	SPON2	chr4:1160720-1202750	ctrl	dox	OK	13.4727	113.154	3.07018	5.40598	5e-05	0.000758876	yes	3.06923
LOC643441	LOC643441	LOC643441	chr1:113739403-113748875	ctrl	dox	OK	0	0.0739014	inf	#NAME?	0.00135	0.0123418	yes	3.06869
SPOCK2	SPOCK2	SPOCK2	chr10:73818791-73848790	ctrl	dox	OK	0.0598102	0.575176	3.26554	1.91498	0.00195	0.0166092	yes	3.06736
NINJ2	NINJ2	NINJ2	chr12:673461-772755	ctrl	dox	OK	1.41619	11.9341	3.07501	3.84627	5e-05	0.000758876	yes	3.06606
HBB	HBB	HBB	chr11:5246695-5248301	ctrl	dox	OK	0	0.0737428	inf	#NAME?	0.12335	0.352274	no	3.06597
C9orf92	C9orf92	C9orf92	chr9:16203932-16276311	ctrl	dox	NOTEST	0	0.0737361	inf	0	1	1	no	3.06585
ALPK3	ALPK3	ALPK3	chr15:85359910-85416713	ctrl	dox	OK	0.00514419	0.116801	4.50496	2.17323	0.0464	0.185466	no	3.06573
EPHA10	EPHA10	EPHA10	chr1:38181645-38230824	ctrl	dox	OK	0.0457946	0.456975	3.31887	2.16775	0.0023	0.0189695	yes	3.06515
SCNN1B	SCNN1B	SCNN1B	chr16:23313590-23392620	ctrl	dox	OK	0	0.0735552	inf	#NAME?	5e-05	0.000758876	yes	3.06273
PLLP	PLLP	PLLP	chr16:57290008-57318584	ctrl	dox	OK	4.85693	40.4855	3.05929	5.3399	5e-05	0.000758876	yes	3.05668
RAMP1	RAMP1	RAMP1	chr2:238768186-238820755	ctrl	dox	OK	0.186333	1.62344	3.1231	1.96841	0.00915	0.0558804	no	3.05654
GUCA2A	GUCA2A	GUCA2A	chr1:42628361-42630395	ctrl	dox	OK	0	0.0731722	inf	#NAME?	0.07235	0.250587	no	3.0561
CAV3	CAV3	CAV3	chr3:8775485-8788451	ctrl	dox	OK	0	0.072945	inf	#NAME?	0.12135	0.349397	no	3.05216
LOC100500773	LOC100500773	LOC100500773	chr8:96959212-96960576	ctrl	dox	OK	0	0.0729308	inf	#NAME?	0.0197	0.0999473	no	3.05191
NEK3	NEK3	NEK3	chr13:52638899-52733996	ctrl	dox	OK	0	0.0727974	inf	#NAME?	0.0098	0.0589675	no	3.04959
LOC103312105	LOC103312105	LOC103312105	chr11:38639813-38667906	ctrl	dox	NOTEST	0	0.0726713	inf	0	1	1	no	3.04739
ARHGAP8	ARHGAP8	ARHGAP8	chr22:45064426-45258664	ctrl	dox	OK	0.0130248	0.180342	3.7914	0.502555	0.0421	0.172897	no	3.04733
TFCP2L1	TFCP2L1	TFCP2L1	chr2:121974163-122042778	ctrl	dox	OK	0.064697	0.607149	3.23028	3.07403	5e-05	0.000758876	yes	3.0465
PNMA5	PNMA5	PNMA5	chrX:152157367-152162671	ctrl	dox	OK	0	0.0725722	inf	#NAME?	5e-05	0.000758876	yes	3.04566
TEX101	TEX101	TEX101	chr19:43892762-43922767	ctrl	dox	OK	0.0131888	0.181365	3.78151	0.538941	0.2126	0.479793	no	3.04483
TAS1R1	TAS1R1	TAS1R1	chr1:6615337-6639817	ctrl	dox	OK	0.14216	1.24403	3.12943	2.27194	0.00085	0.00846464	yes	3.04291
CES1	CES1	CES1	chr16:55836763-55867075	ctrl	dox	OK	0.0191838	0.230303	3.58557	0.90881	0.24605	0.517613	no	3.04162
ABCC3	ABCC3	ABCC3	chr17:48712217-48769063	ctrl	dox	OK	0.121909	1.07581	3.14154	2.49994	0.1034	0.318056	no	3.04116
MYCBPAP	MYCBPAP	MYCBPAP	chr17:48585744-48608862	ctrl	dox	OK	0.0115893	0.167348	3.85199	1.65122	0.1237	0.352657	no	3.03819
LINC00242	LINC00242	LINC00242	chr6:170188885-170202969	ctrl	dox	OK	0.0546198	0.520509	3.25243	1.75504	0.23125	0.502371	no	3.03733
ANP32D	ANP32D	ANP32D	chr12:48866447-48866843	ctrl	dox	NOTEST	0	0.0720725	inf	0	1	1	no	3.0369
PTK7	PTK7	PTK7	chr6:43044005-43129458	ctrl	dox	OK	0.237305	2.01914	3.08893	3.73124	5e-05	0.000758876	yes	3.03651
FAM209B	FAM209B	FAM209B	chr20:55108301-55111574	ctrl	dox	OK	0.0351103	0.359554	3.35624	0.86983	0.1575	0.405029	no	3.03426
GRM4	GRM4	GRM4	chr6:33986419-34123399	ctrl	dox	OK	0	0.0719015	inf	#NAME?	5e-05	0.000758876	yes	3.03389
VRTN	VRTN	VRTN	chr14:74815165-74826711	ctrl	dox	OK	0	0.0718581	inf	#NAME?	5e-05	0.000758876	yes	3.03313
CTB-174D11.1	CTB-174D11.1	CTB-174D11.1	chr5:168088737-168728133	ctrl	dox	OK	0	0.0718535	inf	#NAME?	0.17455	0.428734	no	3.03304
COL2A1	COL2A1	COL2A1	chr12:48366747-48398285	ctrl	dox	OK	0.108552	0.958754	3.14277	3.42153	5e-05	0.000758876	yes	3.03061
ABCA1	ABCA1	ABCA1	chr9:107543283-107690527	ctrl	dox	OK	0.139209	1.20846	3.11785	3.86772	5e-05	0.000758876	yes	3.02965
CCDC60	CCDC60	CCDC60	chr12:119772516-119978852	ctrl	dox	OK	0	0.0714834	inf	#NAME?	0.0013	0.0119639	yes	3.02651
PDE6G	PDE6G	PDE6G	chr17:79617488-79623607	ctrl	dox	OK	0.150086	1.29328	3.10718	2.17331	0.0038	0.0279512	yes	3.02523
C15orf48	C15orf48	C15orf48	chr15:45722726-45725647	ctrl	dox	OK	7.49911	61.0557	3.02533	4.88041	5e-05	0.000758876	yes	3.02365
LCE2A	LCE2A	LCE2A	chr1:152670839-152671918	ctrl	dox	OK	0	0.0713172	inf	#NAME?	0.12685	0.357157	no	3.02356
RTDR1	RTDR1	RTDR1	chr22:23401592-23484241	ctrl	dox	OK	0	0.0711061	inf	#NAME?	0.1711	0.42469	no	3.01981
LOC101926963	LOC101926963	LOC101926963	chr7:588833-826116	ctrl	dox	OK	0.41688	3.44458	3.04663	0.902447	0.0545	0.206532	no	3.01661
KRT7	KRT7	KRT7	chr12:52626953-52642709	ctrl	dox	OK	1.98637	16.0988	3.01875	4.61648	5e-05	0.000758876	yes	3.0124
FGFBP2	FGFBP2	FGFBP2	chr4:15961862-15964859	ctrl	dox	OK	1.09332	8.88192	3.02215	3.73947	5e-05	0.000758876	yes	3.01064
DKKL1	DKKL1	DKKL1	chr19:49866986-49891338	ctrl	dox	OK	0	0.0705707	inf	#NAME?	0.049	0.191802	no	3.01026
RNF175	RNF175	RNF175	chr4:154631311-154681387	ctrl	dox	OK	0.119738	1.03476	3.11134	2.11247	0.01315	0.07383	no	3.0095
LOC102724190	LOC102724190	LOC102724190	chr14:77507391-77542534	ctrl	dox	OK	0.0447704	0.431039	3.2672	1.29821	0.13815	0.37663	no	3.00944
BOC	BOC	BOC	chr3:112931374-113160361	ctrl	dox	OK	0.0515527	0.485193	3.23444	1.18789	0.17865	0.434289	no	3.0081
PKP3	PKP3	PKP3	chr11:394216-404908	ctrl	dox	OK	0.317947	2.62285	3.04428	3.60781	5e-05	0.000758876	yes	3.00509
FGF4	FGF4	FGF4	chr11:69587796-69590171	ctrl	dox	OK	0	0.0702631	inf	#NAME?	0.00645	0.0422355	yes	3.00474
LOC63930	LOC63930	LOC63930	chr20:61640734-61716423	ctrl	dox	OK	0	0.0701712	inf	#NAME?	5e-05	0.000758876	yes	3.00308
LOC151484	LOC151484	LOC151484	chr2:231751260-231769232	ctrl	dox	OK	0.011127	0.159362	3.84017	0.915528	0.15565	0.402765	no	3.00295
FREM3	FREM3	FREM3	chr4:144498560-144621828	ctrl	dox	OK	0.00245177	0.0896614	5.19259	1.0156	0.1404	0.37988	no	3.00068
HOXC-AS3	HOXC-AS3	HOXC-AS3	chr12:54377734-54384062	ctrl	dox	NOTEST	0	0.0698237	inf	0	1	1	no	2.99682
IRAK2	IRAK2	IRAK2	chr3:10206562-10285427	ctrl	dox	OK	1.06286	8.54014	3.00631	4.52325	5e-05	0.000758876	yes	2.99449
LINC00857	LINC00857	LINC00857	chr10:81967465-81979413	ctrl	dox	OK	0.0191747	0.222247	3.53489	1.52109	0.25285	0.521454	no	2.99287
SCUBE1	SCUBE1	SCUBE1	chr22:43599228-43739394	ctrl	dox	OK	0.0353727	0.351189	3.31154	2.40925	0.00425	0.0304504	yes	2.99286
IZUMO1	IZUMO1	IZUMO1	chr19:49244144-49250166	ctrl	dox	OK	0	0.0695755	inf	#NAME?	0.00985	0.0592088	no	2.99232
LINC00672	LINC00672	LINC00672	chr17:37081420-37085637	ctrl	dox	OK	0.00583868	0.116026	4.31266	1.04509	0.1556	0.402765	no	2.9922
ADAMTSL2	ADAMTSL2	ADAMTSL2	chr9:136397285-136440641	ctrl	dox	OK	0.162783	1.36251	3.06525	3.25133	5e-05	0.000758876	yes	2.98978
XKR5	XKR5	XKR5	chr8:6666040-6699975	ctrl	dox	OK	0.0605388	0.549857	3.18313	2.39724	0.1978	0.460277	no	2.98857
C9orf50	C9orf50	C9orf50	chr9:132371162-132404448	ctrl	dox	OK	0.0294575	0.303133	3.36325	0.258428	0.2214	0.490649	no	2.9884
TEX38	TEX38	TEX38	chr1:47137496-47139256	ctrl	dox	OK	0	0.0693522	inf	#NAME?	0.0304	0.136492	no	2.98827
CLDN6	CLDN6	CLDN6	chr16:3064712-3068188	ctrl	dox	OK	0.0282365	0.293237	3.37643	1.38477	0.2458	0.517496	no	2.98742
LOC286059	LOC286059	LOC286059	chr8:22844929-22941132	ctrl	dox	OK	0.0194635	0.223607	3.52212	0.267952	0.22595	0.496929	no	2.98708
TSPO2	TSPO2	TSPO2	chr6:41010236-41012076	ctrl	dox	OK	0.0313481	0.317541	3.34049	0.712092	0.21895	0.488051	no	2.98578
ANXA8	ANXA8	ANXA8	chr10:48255203-48271368	ctrl	dox	OK	0.0211884	0.237	3.48354	1.00224	0.25205	0.521258	no	2.98543
ACHE	ACHE	ACHE	chr7:100487614-100493592	ctrl	dox	OK	0.157169	1.31113	3.06042	2.72532	5e-05	0.000758876	yes	2.98239
MAGEB5	MAGEB5	MAGEB5	chrX:26234285-26236387	ctrl	dox	OK	0	0.0688911	inf	#NAME?	0.0126	0.0717062	no	2.97986
FAM182B	FAM182B	FAM182B	chr20:25744101-25781927	ctrl	dox	OK	0	0.0688591	inf	#NAME?	0.1233	0.352244	no	2.97928
C15orf59	C15orf59	C15orf59	chr15:74032140-74043816	ctrl	dox	OK	0.0146927	0.18462	3.65138	0.833687	0.15575	0.402837	no	2.9785
ODF1	ODF1	ODF1	chr8:103563847-103573245	ctrl	dox	OK	0	0.068799	inf	#NAME?	0.0326	0.143923	no	2.97818
ADAMTSL4	ADAMTSL4	ADAMTSL4	chr1:150521844-150552214	ctrl	dox	OK	0.0821834	0.716284	3.12361	0.419294	0.0677	0.239082	no	2.97795
LOC100507091	LOC100507091	LOC100507091	chr12:123468026-123594975	ctrl	dox	OK	0.0159619	0.194538	3.60735	0.485185	0.23975	0.511006	no	2.9779
C10orf10	C10orf10	C10orf10	chr10:45455218-45490172	ctrl	dox	OK	1.6257	12.8727	2.98518	2.47241	0.0008	0.00807874	yes	2.97745
FBLIM1	FBLIM1	FBLIM1	chr1:16085254-16113084	ctrl	dox	OK	1.14748	9.10034	2.98745	3.92697	5e-05	0.000758876	yes	2.97652
GCKR	GCKR	GCKR	chr2:27719705-27746550	ctrl	dox	OK	0	0.0686471	inf	#NAME?	0.00245	0.0199772	yes	2.97539
KRT81	KRT81	KRT81	chr12:52679696-52685299	ctrl	dox	OK	5.74607	45.2116	2.97605	6.2375	5e-05	0.000758876	yes	2.97386
TNFSF12-TNFSF13	TNFSF12-TNFSF13	TNFSF12-TNFSF13	chr17:7452374-7464925	ctrl	dox	OK	0	0.0685029	inf	#NAME?	0.2276	0.498762	no	2.97275
LAMA5	LAMA5	LAMA5	chr20:60884115-60942368	ctrl	dox	OK	0.113154	0.956571	3.07958	3.7496	5e-05	0.000758876	yes	2.97241
GRIK1-AS2	GRIK1-AS2	GRIK1-AS2	chr21:30909253-31312282	ctrl	dox	OK	0	0.0684207	inf	#NAME?	0.0315	0.140204	no	2.97123
PDGFRB	PDGFRB	PDGFRB	chr5:149493401-149535422	ctrl	dox	OK	0.352985	2.83633	3.00635	4.23486	5e-05	0.000758876	yes	2.97112
UBXN10	UBXN10	UBXN10	chr1:20510735-20519942	ctrl	dox	OK	0.0232762	0.250867	3.42999	1.80945	0.17155	0.42469	no	2.97075
REC114	REC114	REC114	chr15:73735498-73925753	ctrl	dox	OK	0.0690318	0.609361	3.14196	0.293172	0.23865	0.509993	no	2.97028
CAPN8	CAPN8	CAPN8	chr1:223714971-223853436	ctrl	dox	OK	0	0.0682269	inf	#NAME?	0.0005	0.00552122	yes	2.96766
LOC100130238	LOC100130238	LOC100130238	chr12:132680916-132905905	ctrl	dox	OK	0.0151194	0.186364	3.62365	1.43812	0.1721	0.4251	no	2.96666
SOX8	SOX8	SOX8	chr16:1031807-1036979	ctrl	dox	OK	5.03979	39.4278	2.96778	6.79159	5e-05	0.000758876	yes	2.96528
ADAD2	ADAD2	ADAD2	chr16:84224722-84230772	ctrl	dox	OK	0.0100309	0.146396	3.86735	0.678014	0.2978	0.572729	no	2.9649
CELA1	CELA1	CELA1	chr12:51722226-51740463	ctrl	dox	OK	0.0257137	0.268564	3.38466	0.895975	0.1767	0.431477	no	2.96346
TMEM88	TMEM88	TMEM88	chr17:7758383-7759417	ctrl	dox	OK	0.120107	1.00361	3.06281	1.83723	0.01145	0.0665108	no	2.96173
RARRES1	RARRES1	RARRES1	chr3:158414896-158450275	ctrl	dox	OK	0.0422973	0.396391	3.22829	1.01081	0.23305	0.504328	no	2.95806
ADD3-AS1	ADD3-AS1	ADD3-AS1	chr10:111705316-111895323	ctrl	dox	OK	0	0.067707	inf	#NAME?	0.16665	0.418197	no	2.95804
LINC00307	LINC00307	LINC00307	chr21:31581468-31584101	ctrl	dox	NOTEST	0	0.0676579	inf	0	1	1	no	2.95713
CATIP	CATIP	CATIP	chr2:219221578-219232817	ctrl	dox	OK	0	0.0675272	inf	#NAME?	0.1801	0.436161	no	2.9547
DMRTB1	DMRTB1	DMRTB1	chr1:53925071-53933158	ctrl	dox	OK	0	0.0673946	inf	#NAME?	0.0009	0.00885452	yes	2.95223
HRH3	HRH3	HRH3	chr20:60790016-60795323	ctrl	dox	OK	0.00840832	0.132408	3.97703	0.992551	0.15555	0.402765	no	2.9516
SH2D6	SH2D6	SH2D6	chr2:85661917-85664152	ctrl	dox	OK	0.116805	0.969849	3.05366	1.83588	0.0227	0.110725	no	2.94995
TLX1	TLX1	TLX1	chr10:102891060-102897546	ctrl	dox	OK	0	0.0672375	inf	#NAME?	0.00055	0.00600319	yes	2.9493
PROP1	PROP1	PROP1	chr5:177419235-177423243	ctrl	dox	OK	0	0.0671239	inf	#NAME?	0.0029	0.0227378	yes	2.94718
LSMEM2	LSMEM2	LSMEM2	chr3:50316517-50330026	ctrl	dox	OK	0.297051	2.35644	2.98783	0.615969	0.094	0.298456	no	2.94617
LINC00592	LINC00592	LINC00592	chr12:52604713-52617597	ctrl	dox	OK	0.0873208	0.739941	3.08301	1.95201	0.02585	0.122206	no	2.94596
NGB	NGB	NGB	chr14:77731833-77737655	ctrl	dox	OK	0	0.0670491	inf	#NAME?	0.07385	0.254653	no	2.94578
DUSP15	DUSP15	DUSP15	chr20:30448869-30458479	ctrl	dox	OK	1.33076	10.315	2.95443	3.89889	5e-05	0.000758876	yes	2.94502
CD37	CD37	CD37	chr19:49838676-49865714	ctrl	dox	OK	0	0.0669857	inf	#NAME?	0.1072	0.325736	no	2.94459
LOC285593	LOC285593	LOC285593	chr5:173006636-173012071	ctrl	dox	OK	0	0.0667989	inf	#NAME?	0.0566	0.212206	no	2.94109
FCGR1A	FCGR1A	FCGR1A	chr1:149754244-149783928	ctrl	dox	OK	0	0.0667262	inf	#NAME?	0.14765	0.391647	no	2.93972
RXRG	RXRG	RXRG	chr1:165370158-165414592	ctrl	dox	OK	0.322387	2.53937	2.97761	2.41599	0.00025	0.00312152	yes	2.9392
HAS1	HAS1	HAS1	chr19:52216364-52227221	ctrl	dox	OK	0.0172431	0.198912	3.52804	1.39573	0.24555	0.517394	no	2.93893
THPO	THPO	THPO	chr3:184089722-184097476	ctrl	dox	OK	0.0124515	0.161979	3.70142	0.3109	0.2241	0.49428	no	2.93735
SKOR2	SKOR2	SKOR2	chr18:44738459-44775554	ctrl	dox	OK	0	0.066548	inf	#NAME?	0.12585	0.355233	no	2.93636
SERPINA12	SERPINA12	SERPINA12	chr14:94953619-94984181	ctrl	dox	OK	0	0.0665341	inf	#NAME?	0.00075	0.007695	yes	2.9361
FAM223B	FAM223B	FAM223B	chrX:153799478-153800188	ctrl	dox	NOTEST	0	0.0664423	inf	0	1	1	no	2.93437
ADCYAP1R1	ADCYAP1R1	ADCYAP1R1	chr7:31092075-31151093	ctrl	dox	OK	0.00973809	0.140748	3.85334	1.22915	0.138	0.376507	no	2.93308
GAL3ST3	GAL3ST3	GAL3ST3	chr11:65808235-65816651	ctrl	dox	OK	0	0.0663269	inf	#NAME?	0.0006	0.00643164	yes	2.93219
SYT8	SYT8	SYT8	chr11:1855539-1858751	ctrl	dox	OK	0.126965	1.03467	3.02667	1.97922	0.10985	0.330323	no	2.93117
BBOX1	BBOX1	BBOX1	chr11:27062508-27149354	ctrl	dox	OK	0.0492787	0.441781	3.1643	1.68222	0.0302	0.135934	no	2.93004
S100A2	S100A2	S100A2	chr1:153533584-153538306	ctrl	dox	OK	18.9729	144.606	2.93011	6.57738	5e-05	0.000758876	yes	2.92945
RASGRP2	RASGRP2	RASGRP2	chr11:64494382-64512928	ctrl	dox	OK	0	0.0661673	inf	#NAME?	0.0004	0.00458914	yes	2.92917
C1orf177	C1orf177	C1orf177	chr1:55271735-55307937	ctrl	dox	OK	0.0107672	0.148176	3.7826	0.600463	0.2283	0.499528	no	2.92915
INTS4L2	INTS4L2	INTS4L2	chr7:64600748-65235797	ctrl	dox	OK	0.0109586	0.149499	3.77001	0.28665	0.2598	0.529719	no	2.92793
LOC101928861	LOC101928861	LOC101928861	chr7:132937822-133750513	ctrl	dox	OK	0	0.0660555	inf	#NAME?	0.1482	0.392005	no	2.92705
C10orf105	C10orf105	C10orf105	chr10:73156690-73575704	ctrl	dox	OK	0	0.0660418	inf	#NAME?	0.0865	0.282743	no	2.92679
C1orf189	C1orf189	C1orf189	chr1:154171561-154178841	ctrl	dox	OK	0	0.0659217	inf	#NAME?	0.12685	0.357157	no	2.92451
KIAA1644	KIAA1644	KIAA1644	chr22:44639556-44708731	ctrl	dox	OK	0.0833095	0.697195	3.06501	3.15485	5e-05	0.000758876	yes	2.92201
DEGS2	DEGS2	DEGS2	chr14:100612752-100626012	ctrl	dox	OK	0	0.06577	inf	#NAME?	0.00645	0.0422355	yes	2.92163
GNAZ	GNAZ	GNAZ	chr22:23401592-23484241	ctrl	dox	OK	0.972016	7.42747	2.93382	4.30365	5e-05	0.000758876	yes	2.92099
TULP1	TULP1	TULP1	chr6:35465650-35480679	ctrl	dox	OK	0.00851804	0.130136	3.93336	0.62183	0.2384	0.50958	no	2.91982
GPR25	GPR25	GPR25	chr1:200842082-200843306	ctrl	dox	OK	0	0.0656355	inf	#NAME?	0.0143	0.0787597	no	2.91906
USHBP1	USHBP1	USHBP1	chr19:17360848-17375544	ctrl	dox	OK	0	0.0655971	inf	#NAME?	5e-05	0.000758876	yes	2.91833
NYAP1	NYAP1	NYAP1	chr7:100081549-100092424	ctrl	dox	OK	0.101165	0.830278	3.03689	2.95405	0.00035	0.00411812	yes	2.91816
GPSM1	GPSM1	GPSM1	chr9:139221931-139254057	ctrl	dox	OK	2.45981	18.6582	2.92319	5.63995	5e-05	0.000758876	yes	2.91811
GRM2	GRM2	GRM2	chr3:51741080-51752625	ctrl	dox	OK	0.0247448	0.252362	3.3503	1.49684	0.25195	0.521258	no	2.91669
FAM159A	FAM159A	FAM159A	chr1:53099065-53122737	ctrl	dox	OK	0	0.0654802	inf	#NAME?	0.12495	0.35414	no	2.9161
HID1	HID1	HID1	chr17:72946838-72971823	ctrl	dox	OK	0.0974846	0.801121	3.03877	2.28747	0.00315	0.0242012	yes	2.91579
DPEP2	DPEP2	DPEP2	chr16:68021292-68033421	ctrl	dox	OK	0.0124411	0.159224	3.67787	0.931723	0.17215	0.425107	no	2.91472
LGALS4	LGALS4	LGALS4	chr19:39292310-39303740	ctrl	dox	OK	0	0.065402	inf	#NAME?	0.0267	0.124908	no	2.9146
STAB1	STAB1	STAB1	chr3:52529355-52569093	ctrl	dox	OK	0.00174014	0.0784859	5.49516	0.367224	0.28865	0.56169	no	2.914
ITPRIPL1	ITPRIPL1	ITPRIPL1	chr2:96991061-96994091	ctrl	dox	OK	0.0207771	0.221956	3.41721	0.758921	0.1386	0.377513	no	2.91392
OR9G9	OR9G9	OR9G9	chr11:56467863-56468781	ctrl	dox	NOTEST	0	0.0651494	inf	0	1	1	no	2.90976
SOHLH1	SOHLH1	SOHLH1	chr9:138585254-138591374	ctrl	dox	OK	0.0897336	0.738354	3.04059	1.88827	0.1218	0.350187	no	2.90757
SLC22A20	SLC22A20	SLC22A20	chr11:64981310-65010228	ctrl	dox	OK	0.0386638	0.355055	3.19899	1.66109	0.24995	0.519849	no	2.90719
CCND2	CCND2	CCND2	chr12:4382901-4414522	ctrl	dox	OK	0.0361622	0.335633	3.21433	2.33416	0.00815	0.0508102	no	2.90446
LINC00605	LINC00605	LINC00605	chr14:103653557-103655365	ctrl	dox	OK	0	0.0647901	inf	#NAME?	0.0143	0.0787597	no	2.90285
OSTN	OSTN	OSTN	chr3:190930321-190967910	ctrl	dox	NOTEST	0	0.064787	inf	0	1	1	no	2.90279
NOTCH3	NOTCH3	NOTCH3	chr19:15270443-15311792	ctrl	dox	OK	0.0696332	0.585411	3.0716	2.92441	0.00025	0.00312152	yes	2.90244
SHANK1	SHANK1	SHANK1	chr19:51165083-51220195	ctrl	dox	OK	0.0447679	0.398294	3.1533	2.92943	0.0002	0.00255224	yes	2.89821
SEC14L4	SEC14L4	SEC14L4	chr22:30884897-30901698	ctrl	dox	OK	0.063378	0.53657	3.08171	2.27962	0.0013	0.0119639	yes	2.89699
MSI1	MSI1	MSI1	chr12:120779132-120806983	ctrl	dox	OK	0.0950712	0.771245	3.02011	2.7081	0.0007	0.00729454	yes	2.89441
PDE4A	PDE4A	PDE4A	chr19:10527448-10580307	ctrl	dox	OK	0.137979	1.08909	2.9806	3.11733	5e-05	0.000758876	yes	2.89285
C16orf89	C16orf89	C16orf89	chr16:5094122-5116146	ctrl	dox	OK	0.0233179	0.237327	3.34736	1.11562	0.15735	0.404946	no	2.89205
ZNF629	ZNF629	ZNF629	chr16:30789769-30798523	ctrl	dox	OK	0.51966	3.9082	2.91086	4.33484	5e-05	0.000758876	yes	2.88705
KRTDAP	KRTDAP	KRTDAP	chr19:35978225-35981433	ctrl	dox	NOTEST	0	0.0638898	inf	0	1	1	no	2.88538
MT1X	MT1X	MT1X	chr16:56716381-56718108	ctrl	dox	OK	55.9681	412.634	2.88219	5.98068	5e-05	0.000758876	yes	2.88196
PGPEP1L	PGPEP1L	PGPEP1L	chr15:99511458-99551024	ctrl	dox	OK	0	0.0636902	inf	#NAME?	0.0022	0.0182875	yes	2.88147
ALX4	ALX4	ALX4	chr11:44282277-44331716	ctrl	dox	OK	0.00362505	0.0903644	4.63968	1.11384	0.17165	0.42469	no	2.88091
KLHDC8A	KLHDC8A	KLHDC8A	chr1:205305192-205326218	ctrl	dox	OK	0.00770816	0.120292	3.96401	0.501599	0.2479	0.518496	no	2.87926
LOC100862671	LOC100862671	LOC100862671	chr16:30751511-30756517	ctrl	dox	OK	0.695971	5.18399	2.89696	3.52952	5e-05	0.000758876	yes	2.87916
TF	TF	TF	chr3:133464976-133497850	ctrl	dox	OK	0.786207	5.84297	2.89372	3.70113	5e-05	0.000758876	yes	2.87795
LOC100128531	LOC100128531	LOC100128531	chr22:25423940-25593415	ctrl	dox	OK	0.0390446	0.350069	3.16445	0.382638	0.2992	0.574192	no	2.87611
RIMS3	RIMS3	RIMS3	chr1:41086351-41131324	ctrl	dox	OK	0.558017	4.16001	2.89821	4.52636	5e-05	0.000758876	yes	2.87604
SPINT1	SPINT1	SPINT1	chr15:41136245-41149853	ctrl	dox	OK	1.03298	7.64579	2.88785	3.90062	5e-05	0.000758876	yes	2.87584
BCRP3	BCRP3	BCRP3	chr22:25028881-25055114	ctrl	dox	OK	0.0127365	0.156852	3.62237	0.706568	0.2536	0.521921	no	2.87549
SHF	SHF	SHF	chr15:45459411-45493373	ctrl	dox	OK	0.757363	5.61489	2.8902	3.76168	5e-05	0.000758876	yes	2.87384
FAM83A-AS1	FAM83A-AS1	FAM83A-AS1	chr8:124191286-124222319	ctrl	dox	OK	0	0.0632686	inf	#NAME?	0.11705	0.3429	no	2.8732
STAP2	STAP2	STAP2	chr19:4324039-4338847	ctrl	dox	OK	0.264317	1.99974	2.91947	2.47973	0.00085	0.00846464	yes	2.87309
PLIN4	PLIN4	PLIN4	chr19:4472192-4517716	ctrl	dox	OK	0.0707274	0.580737	3.03755	1.02916	0.10505	0.321105	no	2.87139
DISP2	DISP2	DISP2	chr15:40650433-40663256	ctrl	dox	OK	0.10584	0.837168	2.98363	3.15915	5e-05	0.000758876	yes	2.87051
PTF1A	PTF1A	PTF1A	chr10:23481459-23483181	ctrl	dox	OK	0	0.0630799	inf	#NAME?	0.0179	0.0932389	no	2.86947
JMJD7-PLA2G4B	JMJD7-PLA2G4B	JMJD7-PLA2G4B	chr15:42120282-42186275	ctrl	dox	OK	0.0844841	0.68032	3.00946	0.832475	0.2626	0.531726	no	2.86912
NLRP10	NLRP10	NLRP10	chr11:7981155-7985059	ctrl	dox	OK	0.0591044	0.49464	3.06504	2.07484	0.00835	0.0518231	no	2.86841
ZBTB46	ZBTB46	ZBTB46	chr20:62371210-62436856	ctrl	dox	OK	0.303682	2.28029	2.90858	2.04464	0.00425	0.0304504	yes	2.86816
TMEM150B	TMEM150B	TMEM150B	chr19:55824168-55836708	ctrl	dox	OK	0.0310902	0.289823	3.22064	0.469221	0.2471	0.518496	no	2.86724
PNPLA5	PNPLA5	PNPLA5	chr22:44275557-44287893	ctrl	dox	OK	0	0.0629006	inf	#NAME?	0.04375	0.178085	no	2.86593
WISP1	WISP1	WISP1	chr8:134203281-134243932	ctrl	dox	OK	0.00891162	0.127841	3.84252	0.766629	0.10815	0.327846	no	2.86566
COL8A2	COL8A2	COL8A2	chr1:36560843-36565850	ctrl	dox	OK	0.126069	0.98132	2.96051	2.97962	5e-05	0.000758876	yes	2.86501
ALDH8A1	ALDH8A1	ALDH8A1	chr6:135238527-135271260	ctrl	dox	OK	0.0164038	0.182237	3.47372	0.884167	0.1813	0.43818	no	2.86407
LINGO4	LINGO4	LINGO4	chr1:151772764-151777882	ctrl	dox	OK	0	0.0626794	inf	#NAME?	0.0004	0.00458914	yes	2.86155
KCNJ10	KCNJ10	KCNJ10	chr1:160007256-160040051	ctrl	dox	OK	0.317321	2.36668	2.89885	3.62413	5e-05	0.000758876	yes	2.86017
SLC6A13	SLC6A13	SLC6A13	chr12:329786-372039	ctrl	dox	OK	0.0231301	0.230029	3.31397	0.734257	0.2472	0.518496	no	2.85699
TDRG1	TDRG1	TDRG1	chr6:40346162-40347631	ctrl	dox	OK	0	0.0624339	inf	#NAME?	0.0278	0.128316	no	2.85667
ZNF415	ZNF415	ZNF415	chr19:53611131-53636173	ctrl	dox	OK	0.0524058	0.441227	3.07372	1.52574	0.13875	0.377749	no	2.8541
BPIFB4	BPIFB4	BPIFB4	chr20:31669317-31699557	ctrl	dox	OK	0	0.0622175	inf	#NAME?	0.00115	0.0108276	yes	2.85235
CSF2RB	CSF2RB	CSF2RB	chr22:37309674-37336479	ctrl	dox	OK	0	0.0621157	inf	#NAME?	5e-05	0.000758876	yes	2.85031
OR52E6	OR52E6	OR52E6	chr11:5862185-5863127	ctrl	dox	NOTEST	0	0.0621055	inf	0	1	1	no	2.85011
CHI3L2	CHI3L2	CHI3L2	chr1:111770280-111786062	ctrl	dox	OK	1.54253	11.1818	2.85779	3.98849	5e-05	0.000758876	yes	2.84975
ZBBX	ZBBX	ZBBX	chr3:166958076-167098085	ctrl	dox	OK	0.0392282	0.344525	3.13465	1.77469	0.1814	0.438363	no	2.84833
SPATA31D3	SPATA31D3	SPATA31D3	chr9:84558414-84565009	ctrl	dox	OK	0.0196871	0.203728	3.37133	2.357	0.01025	0.0610816	no	2.84787
CSPG4	CSPG4	CSPG4	chr15:75966662-76005189	ctrl	dox	OK	7.82133	56.2504	2.84638	7.78914	5e-05	0.000758876	yes	2.84479
CD200	CD200	CD200	chr3:112051915-112081658	ctrl	dox	OK	0.0239691	0.23398	3.28714	1.31132	0.2269	0.498104	no	2.84447
AP3B2	AP3B2	AP3B2	chr15:83211950-83378660	ctrl	dox	OK	0.0451893	0.386359	3.09589	0.787906	0.05755	0.214959	no	2.84435
ARHGAP30	ARHGAP30	ARHGAP30	chr1:161016731-161039760	ctrl	dox	OK	1.54431	11.1437	2.85119	5.31681	5e-05	0.000758876	yes	2.84318
LOC100130964	LOC100130964	LOC100130964	chr8:39420630-39437653	ctrl	dox	NOTEST	0	0.0617464	inf	0	1	1	no	2.84291
CLPSL1	CLPSL1	CLPSL1	chr6:35748830-35755841	ctrl	dox	NOTEST	0	0.061735	inf	0	1	1	no	2.84268
LOC392196	LOC392196	LOC392196	chr8:11973290-12008698	ctrl	dox	OK	0.017231	0.185056	3.42489	0.651386	0.2651	0.534577	no	2.84057
PLEKHA6	PLEKHA6	PLEKHA6	chr1:204187978-204329057	ctrl	dox	OK	0.00765825	0.116462	3.92671	1.87548	0.0464	0.185466	no	2.84029
NKX1-1	NKX1-1	NKX1-1	chr4:1396719-1400230	ctrl	dox	OK	0	0.0614832	inf	#NAME?	0.0081	0.0506039	no	2.8376
RUFY4	RUFY4	RUFY4	chr2:218899656-218955304	ctrl	dox	OK	0.00653755	0.108147	4.0481	0.733962	0.22625	0.497224	no	2.83677
S100A9	S100A9	S100A9	chr1:153330329-153333503	ctrl	dox	OK	0	0.0614367	inf	#NAME?	0.07235	0.250587	no	2.83667
CXCR5	CXCR5	CXCR5	chr11:118754474-118781613	ctrl	dox	OK	0.00545474	0.100338	4.20121	0.355905	0.2439	0.516114	no	2.83581
TNP1	TNP1	TNP1	chr2:217724181-217724782	ctrl	dox	OK	0.0615003	0.500322	3.02419	0.76665	0.1458	0.388346	no	2.83539
GSDMC	GSDMC	GSDMC	chr8:130760441-130799134	ctrl	dox	OK	0	0.0613494	inf	#NAME?	0.0009	0.00885452	yes	2.8349
ISG20	ISG20	ISG20	chr15:89182038-89198879	ctrl	dox	OK	18.4756	131.814	2.83481	5.95086	5e-05	0.000758876	yes	2.83414
PSD2	PSD2	PSD2	chr5:139175405-139224048	ctrl	dox	OK	0.0202264	0.205257	3.34312	2.06131	0.0086	0.0530811	no	2.83218
MEP1A	MEP1A	MEP1A	chr6:46761093-46807519	ctrl	dox	OK	0	0.0612055	inf	#NAME?	0.00065	0.00685708	yes	2.83199
KLK13	KLK13	KLK13	chr19:51559462-51568367	ctrl	dox	OK	0	0.0611389	inf	#NAME?	0.01295	0.0730956	no	2.83064
PGA5	PGA5	PGA5	chr11:61008628-61018929	ctrl	dox	OK	0	0.0611381	inf	#NAME?	0.0062	0.0410324	yes	2.83062
EMR3	EMR3	EMR3	chr19:14729928-14785730	ctrl	dox	NOTEST	0	0.0610515	inf	0	1	1	no	2.82887
CD300LF	CD300LF	CD300LF	chr17:72667255-72743474	ctrl	dox	OK	0	0.0610447	inf	#NAME?	0.0003	0.00361996	yes	2.82873
PRTFDC1	PRTFDC1	PRTFDC1	chr10:25137535-25241573	ctrl	dox	OK	0.316707	2.31094	2.86726	2.85617	0.0001	0.00140493	yes	2.82864
COL6A1	COL6A1	COL6A1	chr21:47401662-47424963	ctrl	dox	OK	2.7979	19.9372	2.83304	6.25845	5e-05	0.000758876	yes	2.82862
RASA4CP	RASA4CP	RASA4CP	chr7:44068485-44083895	ctrl	dox	OK	0.196483	1.45652	2.89005	1.88767	0.0109	0.064125	no	2.8283
C8orf31	C8orf31	C8orf31	chr8:144120678-144135720	ctrl	dox	OK	0.149794	1.12431	2.90798	2.46851	0.00105	0.0100871	yes	2.82753
FAM19A4	FAM19A4	FAM19A4	chr3:68780914-68981761	ctrl	dox	OK	0.010939	0.138565	3.66301	0.6917	0.304	0.579255	no	2.82683
DENND2A	DENND2A	DENND2A	chr7:140218219-140302342	ctrl	dox	OK	0.342017	2.48695	2.86224	2.83185	5e-05	0.000758876	yes	2.82645
KLK14	KLK14	KLK14	chr19:51581153-51587502	ctrl	dox	OK	0	0.0609205	inf	#NAME?	0.01505	0.0819105	no	2.8262
FAM172BP	FAM172BP	FAM172BP	chr3:101237710-101242731	ctrl	dox	OK	0.163269	1.21818	2.8994	2.53772	0.002	0.0169467	yes	2.82544
FAM181A	FAM181A	FAM181A	chr14:94371075-94395954	ctrl	dox	OK	0	0.0608361	inf	#NAME?	0.00085	0.00846464	yes	2.82448
RBP3	RBP3	RBP3	chr10:48381486-48390991	ctrl	dox	OK	0	0.0607864	inf	#NAME?	5e-05	0.000758876	yes	2.82347
DNAH17	DNAH17	DNAH17	chr17:76374698-76573476	ctrl	dox	OK	0.0734249	0.580364	2.98262	1.69423	0.1903	0.450829	no	2.82305
KLK9	KLK9	KLK9	chr19:51505768-51512890	ctrl	dox	OK	0	0.0607143	inf	#NAME?	0.01245	0.0711004	no	2.822
TRPC2	TRPC2	TRPC2	chr11:3647689-3658789	ctrl	dox	OK	0	0.0606959	inf	#NAME?	0.02135	0.1061	no	2.82163
SLC1A6	SLC1A6	SLC1A6	chr19:15060844-15121455	ctrl	dox	OK	0	0.0606886	inf	#NAME?	0.00015	0.001995	yes	2.82148
MAPK15	MAPK15	MAPK15	chr8:144798506-144804633	ctrl	dox	OK	0	0.0606872	inf	#NAME?	0.0015	0.0134059	yes	2.82145
SLC26A9	SLC26A9	SLC26A9	chr1:205882176-205912588	ctrl	dox	OK	0.00454662	0.0927885	4.35108	0.78322	0.22385	0.494066	no	2.82092
BIN1	BIN1	BIN1	chr2:127805598-127864903	ctrl	dox	OK	3.61498	25.5932	2.8237	5.13278	5e-05	0.000758876	yes	2.82028
PTP4A3	PTP4A3	PTP4A3	chr8:142431487-142442554	ctrl	dox	OK	0.192498	1.42006	2.88304	2.92338	0.0001	0.00140493	yes	2.8201
C20orf203	C20orf203	C20orf203	chr20:31219426-31239783	ctrl	dox	OK	0	0.0605869	inf	#NAME?	5e-05	0.000758876	yes	2.8194
CLPSL2	CLPSL2	CLPSL2	chr6:35744370-35747329	ctrl	dox	NOTEST	0	0.0604543	inf	0	1	1	no	2.81669
C5orf58	C5orf58	C5orf58	chr5:169659949-169673235	ctrl	dox	OK	0.0529172	0.432942	3.03237	0.81494	0.1478	0.391813	no	2.81559
S100A7	S100A7	S100A7	chr1:153430219-153433137	ctrl	dox	NOTEST	0	0.0603935	inf	0	1	1	no	2.81544
UTF1	UTF1	UTF1	chr10:135043777-135045062	ctrl	dox	OK	0	0.0603347	inf	#NAME?	0.0179	0.0932389	no	2.81424
RHOB	RHOB	RHOB	chr2:20646834-20649201	ctrl	dox	OK	53.1177	372.429	2.8097	7.78674	5e-05	0.000758876	yes	2.80947
OR1L8	OR1L8	OR1L8	chr9:125329826-125330756	ctrl	dox	NOTEST	0	0.0601021	inf	0	1	1	no	2.80946
SYT5	SYT5	SYT5	chr19:55684468-55691720	ctrl	dox	OK	0.160812	1.18697	2.88384	2.57366	0.00055	0.00600319	yes	2.80891
KLHL26	KLHL26	KLHL26	chr19:18747837-18781302	ctrl	dox	OK	0.343373	2.46531	2.84392	3.3008	5e-05	0.000758876	yes	2.80835
KCNJ9	KCNJ9	KCNJ9	chr1:160051359-160059212	ctrl	dox	NOTEST	0	0.060048	inf	0	1	1	no	2.80834
ODF3	ODF3	ODF3	chr11:196760-200258	ctrl	dox	OK	0.0188776	0.191946	3.34596	0.631184	0.2348	0.505832	no	2.80595
SLC12A3	SLC12A3	SLC12A3	chr16:56899118-56949762	ctrl	dox	OK	0	0.0599268	inf	#NAME?	0.05345	0.20419	no	2.80585
PCBP3	PCBP3	PCBP3	chr21:47269874-47362368	ctrl	dox	OK	0.0643854	0.510121	2.98603	1.61583	0.25165	0.521151	no	2.80576
KRT83	KRT83	KRT83	chr12:52708084-52715182	ctrl	dox	OK	0.0200669	0.199907	3.31644	1.37332	0.13185	0.366352	no	2.8035
PTPRZ1	PTPRZ1	PTPRZ1	chr7:121513158-121702090	ctrl	dox	OK	0.44042	3.13435	2.83121	3.83134	5e-05	0.000758876	yes	2.80342
TTTY6B	TTTY6B	TTTY6B	chrY:24585086-24630861	ctrl	dox	NOTEST	0	0.0597818	inf	0	1	1	no	2.80285
LRCOL1	LRCOL1	LRCOL1	chr12:133179735-133187037	ctrl	dox	OK	0	0.0596567	inf	#NAME?	0.05475	0.207042	no	2.80026
FOXA3	FOXA3	FOXA3	chr19:46367517-46377055	ctrl	dox	OK	0.949695	6.67489	2.81321	3.54382	5e-05	0.000758876	yes	2.80026
MIR143HG	MIR143HG	MIR143HG	chr5:148786407-148812399	ctrl	dox	OK	0	0.0595322	inf	#NAME?	0.1224	0.350957	no	2.79768
SPTBN5	SPTBN5	SPTBN5	chr15:42120282-42186275	ctrl	dox	OK	0.0357896	0.308366	3.10703	1.46116	0.26085	0.530683	no	2.79759
HIST1H2BH	HIST1H2BH	HIST1H2BH	chr6:26251878-26252303	ctrl	dox	NOTEST	0	0.0594954	inf	0	1	1	no	2.79692
KCNA7	KCNA7	KCNA7	chr19:49570674-49576198	ctrl	dox	OK	0.026168	0.240785	3.20187	2.17162	0.00785	0.049455	yes	2.79367
HS3ST3B1	HS3ST3B1	HS3ST3B1	chr17:14204505-14249492	ctrl	dox	OK	0	0.059219	inf	#NAME?	0.1258	0.355203	no	2.79117
MRGPRG	MRGPRG	MRGPRG	chr11:3239173-3244361	ctrl	dox	NOTEST	0	0.0591978	inf	0	1	1	no	2.79073
ARRB1	ARRB1	ARRB1	chr11:74971165-75062875	ctrl	dox	OK	3.39086	23.4896	2.79229	6.79614	5e-05	0.000758876	yes	2.78866
ADAP1	ADAP1	ADAP1	chr7:937536-995043	ctrl	dox	OK	0.629599	4.40851	2.80779	3.46146	5e-05	0.000758876	yes	2.78832
PLEKHG6	PLEKHG6	PLEKHG6	chr12:6419601-6437672	ctrl	dox	OK	0.0883381	0.668852	2.92058	2.48581	0.0003	0.00361996	yes	2.78727
TBX4	TBX4	TBX4	chr17:59533806-59561664	ctrl	dox	OK	0	0.05896	inf	#NAME?	0.001	0.00966882	yes	2.78576
ASTL	ASTL	ASTL	chr2:96789588-96804175	ctrl	dox	OK	0.0166559	0.173702	3.38251	0.847352	0.17255	0.425802	no	2.78484
ACSL6	ACSL6	ACSL6	chr5:131285666-131347761	ctrl	dox	OK	0.0370494	0.314114	3.08377	2.04417	0.00015	0.001995	yes	2.78425
SLC4A9	SLC4A9	SLC4A9	chr5:139739786-139754722	ctrl	dox	OK	0	0.0588817	inf	#NAME?	5e-05	0.000758876	yes	2.78412
SEMA3B-AS1	SEMA3B-AS1	SEMA3B-AS1	chr3:50304072-50304803	ctrl	dox	OK	0.25852	1.83957	2.83102	1.31998	0.0069	0.0446127	yes	2.78409
OPRK1	OPRK1	OPRK1	chr8:54138275-54164257	ctrl	dox	OK	0.113965	0.842962	2.88688	2.54078	0.00075	0.007695	yes	2.78255
LOC101927347	LOC101927347	LOC101927347	chr3:6674044-6847136	ctrl	dox	NOTEST	0	0.0587196	inf	0	1	1	no	2.78072
PPP1R3G	PPP1R3G	PPP1R3G	chr6:5085719-5087455	ctrl	dox	OK	0.0584172	0.459936	2.97697	1.45902	0.06315	0.228739	no	2.78003
GDPD5	GDPD5	GDPD5	chr11:75145684-75236599	ctrl	dox	OK	3.48875	24.0105	2.78288	5.64648	5e-05	0.000758876	yes	2.77935
FGF19	FGF19	FGF19	chr11:69513005-69519106	ctrl	dox	OK	0.0102257	0.128739	3.65418	0.892053	0.15565	0.402765	no	2.77811
MBD3L1	MBD3L1	MBD3L1	chr19:8953268-8954016	ctrl	dox	NOTEST	0	0.0585527	inf	0	1	1	no	2.77721
TAS2R19	TAS2R19	TAS2R19	chr12:10998447-11328619	ctrl	dox	OK	0.0715976	0.548889	2.93853	0.313475	0.23765	0.508643	no	2.77596
CYP21A1P	CYP21A1P	CYP21A1P	chr6_ssto_hap7:3306068-3368931	ctrl	dox	OK	0	0.0584807	inf	#NAME?	0.0221	0.108654	no	2.7757
SP7	SP7	SP7	chr12:53720359-53730004	ctrl	dox	OK	0.0215819	0.206238	3.25642	1.52302	0.0298	0.134606	no	2.77545
XAF1	XAF1	XAF1	chr17:6659155-6678964	ctrl	dox	OK	0.618686	4.29158	2.79423	3.52137	5e-05	0.000758876	yes	2.77446
C20orf166	C20orf166	C20orf166	chr20:61141437-61167971	ctrl	dox	OK	0	0.0583702	inf	#NAME?	0.10105	0.313089	no	2.77337
SETSIP	SETSIP	SETSIP	chr1:92539992-92541029	ctrl	dox	NOTEST	0	0.0583115	inf	0	1	1	no	2.77213
SIGLEC7	SIGLEC7	SIGLEC7	chr19:51645557-51685222	ctrl	dox	NOTEST	0	0.0579909	inf	0	1	1	no	2.76534
CACNA1H	CACNA1H	CACNA1H	chr16:1203240-1275254	ctrl	dox	OK	0.037777	0.314818	3.05894	2.58079	0.0022	0.0182875	yes	2.76524
IZUMO4	IZUMO4	IZUMO4	chr19:2096867-2099583	ctrl	dox	OK	0.142557	1.02597	2.84738	1.81242	0.1134	0.336823	no	2.76356
FOXN1	FOXN1	FOXN1	chr17:26850958-26865175	ctrl	dox	NOTEST	0	0.0578633	inf	0	1	1	no	2.76263
DAPK2	DAPK2	DAPK2	chr15:64199234-64338521	ctrl	dox	OK	0.0787751	0.591905	2.90955	2.31931	0.0029	0.0227378	yes	2.76131
OCM	OCM	OCM	chr7:5920428-5925994	ctrl	dox	NOTEST	0	0.0577321	inf	0	1	1	no	2.75984
IGDCC3	IGDCC3	IGDCC3	chr15:65619464-65670378	ctrl	dox	OK	0	0.0577131	inf	#NAME?	5e-05	0.000758876	yes	2.75943
TBX21	TBX21	TBX21	chr17:45810609-45823485	ctrl	dox	NOTEST	0	0.0576892	inf	0	1	1	no	2.75893
MT1M	MT1M	MT1M	chr16:56666533-56667898	ctrl	dox	NOTEST	0	0.0575675	inf	0	1	1	no	2.75633
ACER1	ACER1	ACER1	chr19:6306509-6333640	ctrl	dox	NOTEST	0	0.0575535	inf	0	1	1	no	2.75603
MYO15B	MYO15B	MYO15B	chr17:73584138-73663269	ctrl	dox	OK	0.0383508	0.316278	3.04387	1.08863	0.17625	0.430847	no	2.75449
MEG8	MEG8	MEG8	chr14:101361106-101373305	ctrl	dox	NOTEST	0	0.0574429	inf	0	1	1	no	2.75367
SUSD2	SUSD2	SUSD2	chr22:24577443-24585074	ctrl	dox	OK	0.021781	0.203838	3.22628	1.97834	0.01995	0.100874	no	2.75028
PTPN5	PTPN5	PTPN5	chr11:18749474-18814268	ctrl	dox	OK	0.00656774	0.101393	3.94842	0.361484	0.2258	0.49666	no	2.74921
SASH3	SASH3	SASH3	chrX:128913891-128929176	ctrl	dox	OK	0.0120773	0.138249	3.51691	1.41083	0.2529	0.521454	no	2.74739
LY6G6D	LY6G6D	LY6G6D	chr6_ssto_hap7:3013949-3016398	ctrl	dox	NOTEST	0	0.0570873	inf	0	1	1	no	2.74604
ACE	ACE	ACE	chr17:61554421-61575741	ctrl	dox	OK	0.0124822	0.140681	3.49448	1.06468	0.0028	0.0221471	yes	2.74464
ABCC6P2	ABCC6P2	ABCC6P2	chr16:14916288-14918559	ctrl	dox	NOTEST	0	0.0569272	inf	0	1	1	no	2.74259
DMPK	DMPK	DMPK	chr19:46272966-46285815	ctrl	dox	OK	4.49086	30.068	2.74317	5.71277	5e-05	0.000758876	yes	2.74044
UNC5B	UNC5B	UNC5B	chr10:72972291-73062635	ctrl	dox	OK	0.0683581	0.513329	2.9087	3.01176	0.0004	0.00458914	yes	2.73956
ALDOC	ALDOC	ALDOC	chr17:26900132-26903951	ctrl	dox	OK	0.115226	0.825372	2.84057	2.07028	0.00825	0.0513445	no	2.73788
APOE	APOE	APOE	chr19:45409038-45412650	ctrl	dox	OK	11.9572	79.8219	2.7389	6.0881	5e-05	0.000758876	yes	2.73788
SRCIN1	SRCIN1	SRCIN1	chr17:36686258-36762183	ctrl	dox	OK	0.127126	0.904705	2.83118	3.26206	5e-05	0.000758876	yes	2.7378
C1orf185	C1orf185	C1orf185	chr1:51567905-51613754	ctrl	dox	NOTEST	0	0.0566334	inf	0	1	1	no	2.73625
DCHS1	DCHS1	DCHS1	chr11:6642554-6677080	ctrl	dox	OK	0.225893	1.56177	2.78947	4.0339	5e-05	0.000758876	yes	2.73619
WFIKKN2	WFIKKN2	WFIKKN2	chr17:48912604-48919709	ctrl	dox	OK	0.0052059	0.0913034	4.13245	0.974914	0.1719	0.42484	no	2.73598
NUCB1-AS1	NUCB1-AS1	NUCB1-AS1	chr19:49403306-49426540	ctrl	dox	NOTEST	0	0.056601	inf	0	1	1	no	2.73554
SNAI1	SNAI1	SNAI1	chr20:48599512-48605420	ctrl	dox	OK	0.950655	6.35308	2.74046	3.62064	5e-05	0.000758876	yes	2.72763
LOC102577426	LOC102577426	LOC102577426	chr5:180618045-180618908	ctrl	dox	NOTEST	0	0.0561016	inf	0	1	1	no	2.72469
TTTY10	TTTY10	TTTY10	chrY:22627553-22681114	ctrl	dox	NOTEST	0	0.0560492	inf	0	1	1	no	2.72354
ALPI	ALPI	ALPI	chr2:233320832-233324742	ctrl	dox	OK	0	0.0560359	inf	#NAME?	0.0003	0.00361996	yes	2.72325
NES	NES	NES	chr1:156638555-156647189	ctrl	dox	OK	17.257	113.849	2.72187	7.66196	5e-05	0.000758876	yes	2.72116
ULBP3	ULBP3	ULBP3	chr6:150385742-150390202	ctrl	dox	OK	1.27917	8.49059	2.73066	2.90361	0.0001	0.00140493	yes	2.72112
LOC286359	LOC286359	LOC286359	chr9:100153118-100158973	ctrl	dox	OK	0.00835192	0.111002	3.73233	0.74106	0.1409	0.380373	no	2.72103
RIPPLY3	RIPPLY3	RIPPLY3	chr21:38378862-38391958	ctrl	dox	NOTEST	0	0.055867	inf	0	1	1	no	2.71956
STMN4	STMN4	STMN4	chr8:27092839-27115956	ctrl	dox	NOTEST	0	0.0558653	inf	0	1	1	no	2.71952
ALDH1L1-AS1	ALDH1L1-AS1	ALDH1L1-AS1	chr3:125822403-125929011	ctrl	dox	NOTEST	0	0.0556301	inf	0	1	1	no	2.71436
TAL1	TAL1	TAL1	chr1:47681961-47698007	ctrl	dox	NOTEST	0	0.0556128	inf	0	1	1	no	2.71398
LINC00486	LINC00486	LINC00486	chr2:33050509-33171202	ctrl	dox	NOTEST	0	0.0555692	inf	0	1	1	no	2.71302
ISM2	ISM2	ISM2	chr14:77940737-77965210	ctrl	dox	OK	0.0548868	0.415397	2.91996	1.99107	0.00265	0.0212225	yes	2.71281
SLC22A31	SLC22A31	SLC22A31	chr16:89262168-89266529	ctrl	dox	OK	0.0298507	0.250974	3.0717	1.35617	0.00265	0.0212225	yes	2.71123
SPNS3	SPNS3	SPNS3	chr17:4337218-4391499	ctrl	dox	OK	0.0498117	0.381388	2.9367	1.55274	0.0207	0.103442	no	2.7101
SPANXD	SPANXD	SPANXD	chrX:140785557-140786896	ctrl	dox	NOTEST	0	0.0553235	inf	0	1	1	no	2.7076
LINC00260	LINC00260	LINC00260	chr1:203595914-203713209	ctrl	dox	OK	0.0364088	0.293035	3.00871	0.249528	0.21265	0.479846	no	2.70701
DPEP1	DPEP1	DPEP1	chr16:89679715-89704839	ctrl	dox	NOTEST	0	0.0552941	inf	0	1	1	no	2.70695
NBPF22P	NBPF22P	NBPF22P	chr5:85578261-85593365	ctrl	dox	OK	0.102322	0.723149	2.82118	2.2952	0.00115	0.0108276	yes	2.70647
PPL	PPL	PPL	chr16:4932507-4987136	ctrl	dox	OK	0.124254	0.86548	2.80021	3.05998	0.0001	0.00140493	yes	2.70511
TULP2	TULP2	TULP2	chr19:49384221-49401996	ctrl	dox	OK	0.00918996	0.115091	3.64657	0.706108	0.1412	0.38061	no	2.70455
KCNK5	KCNK5	KCNK5	chr6:39156746-39197251	ctrl	dox	OK	1.02142	6.71293	2.71636	3.60358	5e-05	0.000758876	yes	2.70446
C6orf15	C6orf15	C6orf15	chr6_qbl_hap6:2374817-2376150	ctrl	dox	NOTEST	0	0.0551592	inf	0	1	1	no	2.70397
PPAP2C	PPAP2C	PPAP2C	chr19:281039-291435	ctrl	dox	OK	16.0074	104.151	2.70186	5.7531	5e-05	0.000758876	yes	2.7011
PSTPIP2	PSTPIP2	PSTPIP2	chr18:43563501-43652250	ctrl	dox	OK	0.183167	1.24555	2.76555	2.58498	0.0002	0.00255224	yes	2.7004
ISLR2	ISLR2	ISLR2	chr15:74421714-74429143	ctrl	dox	NOTEST	0	0.0549768	inf	0	1	1	no	2.69992
CARD11	CARD11	CARD11	chr7:2945709-3083579	ctrl	dox	OK	0.00375666	0.0792843	4.39951	0.952669	0.17175	0.424703	no	2.69828
TRIM43	TRIM43	TRIM43	chr2:96257765-96265469	ctrl	dox	OK	0.159367	1.0892	2.77284	1.84922	0.01275	0.0721937	no	2.69823
TUBA4A	TUBA4A	TUBA4A	chr2:220110191-220136910	ctrl	dox	OK	1.04393	6.81758	2.70723	1.96639	0.00475	0.033263	yes	2.6956
CST5	CST5	CST5	chr20:23856571-23860380	ctrl	dox	OK	0.0337958	0.273716	3.01776	0.828435	0.1744	0.428483	no	2.69558
RBAK-RBAKDN	RBAK-RBAKDN	RBAK-RBAKDN	chr7:5085451-5112854	ctrl	dox	OK	0	0.0547802	inf	#NAME?	0.19005	0.450653	no	2.69555
RNASE8	RNASE8	RNASE8	chr14:21484921-21572863	ctrl	dox	NOTEST	0	0.0547602	inf	0	1	1	no	2.69511
CNR2	CNR2	CNR2	chr1:24200459-24239817	ctrl	dox	NOTEST	0	0.0547196	inf	0	1	1	no	2.6942
UBE2F-SCLY	UBE2F-SCLY	UBE2F-SCLY	chr2:238875586-239008054	ctrl	dox	OK	0.0605829	0.446055	2.88024	0.486037	0.4586	0.720084	no	2.69182
IL20RB	IL20RB	IL20RB	chr3:136676706-136729926	ctrl	dox	OK	0.589042	3.85773	2.71131	3.20615	5e-05	0.000758876	yes	2.69076
PRKX-AS1	PRKX-AS1	PRKX-AS1	chrX:3522383-3631675	ctrl	dox	NOTEST	0	0.054529	inf	0	1	1	no	2.68995
ARHGEF4	ARHGEF4	ARHGEF4	chr2:131674223-131804826	ctrl	dox	OK	0.0447123	0.342977	2.93937	2.04251	0.20385	0.468227	no	2.68964
LINC00620	LINC00620	LINC00620	chr3:13692220-13788132	ctrl	dox	NOTEST	0	0.0544859	inf	0	1	1	no	2.68898
TMEM72	TMEM72	TMEM72	chr10:45306471-45455137	ctrl	dox	NOTEST	0	0.0542038	inf	0	1	1	no	2.68266
FIBCD1	FIBCD1	FIBCD1	chr9:133777824-133814455	ctrl	dox	OK	0.293768	1.93986	2.72321	3.07954	5e-05	0.000758876	yes	2.68233
BEAN1	BEAN1	BEAN1	chr16:66461199-66527432	ctrl	dox	OK	0.00689697	0.0984194	3.83491	0.226062	0.248	0.518496	no	2.68179
CCDC109B	CCDC109B	CCDC109B	chr4:110481354-110608872	ctrl	dox	OK	0.446522	2.91476	2.70657	2.66808	0.00065	0.00685708	yes	2.67956
LOC100505782	LOC100505782	LOC100505782	chr17:39558667-39568840	ctrl	dox	OK	0.00934757	0.113939	3.60753	0.835411	0.15635	0.403601	no	2.67941
C1orf106	C1orf106	C1orf106	chr1:200860626-200884864	ctrl	dox	OK	0.82821	5.35494	2.6928	4.05116	5e-05	0.000758876	yes	2.67818
HFE	HFE	HFE	chr6:26087508-26095469	ctrl	dox	NOTEST	0	0.0539791	inf	0	1	1	no	2.6776
CTAG1B	CTAG1B	CTAG1B	chrX:153845864-153847522	ctrl	dox	NOTEST	0	0.0539718	inf	0	1	1	no	2.67744
INSRR	INSRR	INSRR	chr1:156776034-156851642	ctrl	dox	NOTEST	0	0.053819	inf	0	1	1	no	2.67399
ADCY4	ADCY4	ADCY4	chr14:24787554-24804277	ctrl	dox	OK	0.0124132	0.133032	3.42183	0.985743	0.1575	0.405029	no	2.67392
LINC00266-1	LINC00266-1	LINC00266-1	chr20:62921737-62934707	ctrl	dox	OK	0.253535	1.66839	2.7182	2.17655	0.00525	0.0360473	yes	2.67101
RASAL3	RASAL3	RASAL3	chr19:15562437-15575382	ctrl	dox	OK	0.025223	0.214268	3.0866	1.80187	0.0226	0.110357	no	2.67063
DHRS7C	DHRS7C	DHRS7C	chr17:9674750-9694614	ctrl	dox	NOTEST	0	0.0536522	inf	0	1	1	no	2.67021
MACROD2-AS1	MACROD2-AS1	MACROD2-AS1	chr20:13976145-16033841	ctrl	dox	NOTEST	0	0.0536278	inf	0	1	1	no	2.66966
TCF15	TCF15	TCF15	chr20:584636-590910	ctrl	dox	OK	0.377787	2.45672	2.70109	2.43513	0.0014	0.0126955	yes	2.66926
LOC100506125	LOC100506125	LOC100506125	chr12:49182929-49184318	ctrl	dox	NOTEST	0	0.0535648	inf	0	1	1	no	2.66823
MMP9	MMP9	MMP9	chr20:44637546-44645200	ctrl	dox	OK	0.11045	0.755429	2.7739	2.18834	0.0037	0.027384	yes	2.66783
RASD1	RASD1	RASD1	chr17:17397752-17399709	ctrl	dox	OK	0.134228	0.90574	2.75441	2.25023	0.0033	0.0251279	yes	2.66659
KCNJ12	KCNJ12,KCNJ18	KCNJ12,KCNJ18	chr17:21279698-21323179	ctrl	dox	OK	0.223418	1.47051	2.7185	2.75621	0.0003	0.00361996	yes	2.66511
KLHL30	KLHL30	KLHL30	chr2:239047362-239061547	ctrl	dox	OK	0.0152438	0.149937	3.29807	1.51153	0.0602	0.22163	no	2.6635
CTRB1	CTRB1	CTRB1	chr16:75252883-75258822	ctrl	dox	OK	0	0.0533489	inf	#NAME?	0.0388	0.163495	no	2.66332
OBP2A	OBP2A	OBP2A	chr9:138437984-138441815	ctrl	dox	NOTEST	0	0.0533407	inf	0	1	1	no	2.66313
SPATA13-AS1	SPATA13-AS1	SPATA13-AS1	chr13:24553764-24881212	ctrl	dox	NOTEST	0	0.0532713	inf	0	1	1	no	2.66155
FAM19A5	FAM19A5	FAM19A5	chr22:48885271-49147747	ctrl	dox	OK	0.858902	5.48684	2.67541	3.74757	5e-05	0.000758876	yes	2.66134
EFEMP2	EFEMP2	EFEMP2	chr11:65627871-65640405	ctrl	dox	OK	0.238351	1.55907	2.70952	0.932481	0.0822	0.273264	no	2.65946
CASC14	CASC14	CASC14	chr6:21666674-22194616	ctrl	dox	OK	0.0102195	0.117676	3.52543	0.821511	0.4296	0.69742	no	2.65867
TPBGL	TPBGL	TPBGL	chr11:74951949-74954749	ctrl	dox	OK	0.0138356	0.140508	3.34419	1.47019	0.24915	0.519448	no	2.65865
PRG1	PRG1	PRG1	chr19:43853207-43853700	ctrl	dox	NOTEST	0	0.0531012	inf	0	1	1	no	2.65767
LINC01136	LINC01136	LINC01136	chr1:203267885-203274453	ctrl	dox	NOTEST	0	0.0530795	inf	0	1	1	no	2.65717
TPTE2	TPTE2	TPTE2	chr13:19997018-20135714	ctrl	dox	NOTEST	0	0.0530666	inf	0	1	1	no	2.65688
AMHR2	AMHR2	AMHR2	chr12:53817638-53825318	ctrl	dox	NOTEST	0	0.0530429	inf	0	1	1	no	2.65633
DYNLRB2	DYNLRB2	DYNLRB2	chr16:80189854-80597032	ctrl	dox	NOTEST	0	0.0530247	inf	0	1	1	no	2.65592
OGFR-AS1	OGFR-AS1	OGFR-AS1	chr20:61431978-61445352	ctrl	dox	OK	0.125593	0.844314	2.74902	0.268859	0.19315	0.454344	no	2.65548
VSTM2B	VSTM2B	VSTM2B	chr19:30017490-30055226	ctrl	dox	OK	0.0133194	0.136893	3.36145	0.657472	0.1429	0.383753	no	2.65516
DUSP8	DUSP8	DUSP8	chr11:1575280-1593150	ctrl	dox	OK	0.150723	1.00232	2.73337	2.94262	5e-05	0.000758876	yes	2.65502
GJA9	GJA9	GJA9	chr1:39328161-39347298	ctrl	dox	NOTEST	0	0.0529449	inf	0	1	1	no	2.65409
GSTA1	GSTA1	GSTA1	chr6:52656177-52668664	ctrl	dox	NOTEST	0	0.0527267	inf	0	1	1	no	2.64908
LOC101927948	LOC101927948	LOC101927948	chr2:77970821-78517857	ctrl	dox	NOTEST	0	0.0527237	inf	0	1	1	no	2.64901
CEBPA	CEBPA	CEBPA	chr19:33790839-33793470	ctrl	dox	OK	0.0860307	0.592293	2.78339	2.1076	0.00345	0.0259618	yes	2.6489
GOLGA6L17P	GOLGA6L17P	GOLGA6L17P	chr15:82632349-83195272	ctrl	dox	NOTEST	0	0.0525089	inf	0	1	1	no	2.64406
CD72	CD72	CD72	chr9:35605280-35618424	ctrl	dox	OK	0.0519462	0.377104	2.85987	0.541785	0.34125	0.617096	no	2.64363
SYTL1	SYTL1	SYTL1	chr1:27668482-27680423	ctrl	dox	OK	0.0889955	0.60862	2.77374	2.17678	0.0053	0.0363351	yes	2.64362
SH2D2A	SH2D2A	SH2D2A	chr1:156776034-156851642	ctrl	dox	OK	0.176009	1.15187	2.71026	1.37062	0.04585	0.184252	no	2.643
CHODL	CHODL	CHODL	chr21:19289656-19639687	ctrl	dox	OK	0.0229592	0.195722	3.09166	0.64157	0.22865	0.499952	no	2.64194
TSPEAR-AS1	TSPEAR-AS1	TSPEAR-AS1	chr21:45917774-46131495	ctrl	dox	OK	1.35978	8.52882	2.64898	3.55664	5e-05	0.000758876	yes	2.64009
ADAMTS7	ADAMTS7	ADAMTS7	chr15:79051544-79103773	ctrl	dox	OK	0.294089	1.88439	2.67977	3.30077	5e-05	0.000758876	yes	2.63917
MIR381HG	MIR381HG	MIR381HG	chr14:101511493-101518132	ctrl	dox	NOTEST	0	0.0522931	inf	0	1	1	no	2.63907
IL36A	IL36A	IL36A	chr2:113763448-113765621	ctrl	dox	NOTEST	0	0.0522365	inf	0	1	1	no	2.63776
RHD	RHD	RHD	chr1:25598976-25656936	ctrl	dox	OK	0.121948	0.810459	2.73247	1.96449	5e-05	0.000758876	yes	2.63646
TECRL	TECRL	TECRL	chr4:65144176-65275178	ctrl	dox	NOTEST	0	0.052178	inf	0	1	1	no	2.6364
SNCG	SNCG	SNCG	chr10:88718287-88723017	ctrl	dox	OK	0.397624	2.51967	2.66376	2.21603	0.00255	0.0206147	yes	2.63364
VTCN1	VTCN1	VTCN1	chr1:117686208-117753582	ctrl	dox	OK	0.0161361	0.152152	3.23715	0.638039	0.1142	0.338248	no	2.63323
FRG2	FRG2	FRG2	chrUn_gl000228:29338-32226	ctrl	dox	OK	0.447143	2.81918	2.65647	2.55446	0.094	0.298456	no	2.62967
LINC01344	LINC01344	LINC01344	chr1:182173079-182283196	ctrl	dox	NOTEST	0	0.0517202	inf	0	1	1	no	2.62574
PSG6	PSG6	PSG6	chr19:43406233-43422076	ctrl	dox	NOTEST	0	0.0517161	inf	0	1	1	no	2.62565
GCK	GCK	GCK	chr7:44183869-44229022	ctrl	dox	OK	0.00794736	0.100732	3.6639	0.521025	0.24585	0.517496	no	2.62523
DDX11L9	DDX11L9	DDX11L9	chr15:102501015-102519296	ctrl	dox	NOTEST	0	0.0516606	inf	0	1	1	no	2.62435
DOK4	DOK4	DOK4	chr16:57496550-57520385	ctrl	dox	OK	1.03244	6.41498	2.63538	1.50289	0.1546	0.402354	no	2.62373
EPS8L2	EPS8L2	EPS8L2	chr11:706119-727727	ctrl	dox	OK	0.0792384	0.539733	2.76798	2.33546	0.0018	0.0155529	yes	2.62299
ZNF705D	ZNF705D	ZNF705D	chr8:11946846-11973025	ctrl	dox	OK	0.107159	0.711171	2.73045	2.29332	0.00225	0.0185998	yes	2.62187
NBPF4	NBPF4	NBPF4	chr1:108765962-108786703	ctrl	dox	OK	0.117399	0.774156	2.7212	2.23415	0.00075	0.007695	yes	2.62179
PRR35	PRR35	PRR35	chr16:610421-615529	ctrl	dox	OK	0.0175069	0.159226	3.18508	1.36722	0.13175	0.366244	no	2.62109
TRIM50	TRIM50	TRIM50	chr7:72726531-72742085	ctrl	dox	OK	0.0164718	0.152823	3.21379	0.815021	0.1895	0.449884	no	2.62078
IL25	IL25	IL25	chr14:23842017-23845612	ctrl	dox	NOTEST	0	0.0514843	inf	0	1	1	no	2.62022
KIAA1024	KIAA1024	KIAA1024	chr15:79724857-79764642	ctrl	dox	OK	0.268844	1.70391	2.66401	3.48317	5e-05	0.000758876	yes	2.61976
CYP3A7	CYP3A7	CYP3A7	chr7:99282301-99332823	ctrl	dox	OK	0.0099861	0.112741	3.49694	0.803527	0.09005	0.290643	no	2.61855
FRMD1	FRMD1	FRMD1	chr6:168456463-168482237	ctrl	dox	NOTEST	0	0.0513047	inf	0	1	1	no	2.616
DLK1	DLK1	DLK1	chr14:101193201-101201467	ctrl	dox	OK	0.0095444	0.109701	3.52278	0.653958	0.1413	0.380823	no	2.61461
CALY	CALY	CALY	chr10:135138927-135150475	ctrl	dox	OK	0.0303368	0.236902	2.96515	1.03614	0.24845	0.518832	no	2.61377
CTSG	CTSG	CTSG	chr14:25042723-25045466	ctrl	dox	OK	0.0441915	0.321705	2.8639	1.25319	0.2542	0.522574	no	2.61376
IGLON5	IGLON5	IGLON5	chr19:51815101-51834102	ctrl	dox	OK	0.079132	0.535431	2.75837	2.3945	0.0019	0.0162527	yes	2.61338
LINC00571	LINC00571	LINC00571	chr13:38624953-38717369	ctrl	dox	NOTEST	0	0.0511773	inf	0	1	1	no	2.613
ATG9B	ATG9B	ATG9B	chr7:150688143-150721586	ctrl	dox	OK	0.0197231	0.171312	3.11866	1.27503	0.041	0.169817	no	2.60882
HCAR1	HCAR1	HCAR1	chr12:123212152-123215129	ctrl	dox	NOTEST	0	0.050999	inf	0	1	1	no	2.60879
ABCC11	ABCC11	ABCC11	chr16:48200821-48269088	ctrl	dox	OK	0.0451236	0.326186	2.85374	2.03346	0.0013	0.0119639	yes	2.60852
FAM150B	FAM150B	FAM150B	chr2:279560-288308	ctrl	dox	OK	0.0852056	0.569649	2.74105	1.66742	0.02885	0.131439	no	2.60606
2016-09-04	2016-09-04	2016-09-04	chr17:56597197-56769416	ctrl	dox	OK	4.78266	29.1192	2.60609	5.11204	5e-05	0.000758876	yes	2.60357
TOPAZ1	TOPAZ1	TOPAZ1	chr3:44283377-44373590	ctrl	dox	OK	0.0163743	0.150111	3.19653	1.91741	0.0236	0.114061	no	2.60187
SIRT2	SIRT2	SIRT2	chr19:39369194-39399534	ctrl	dox	OK	9.35258	56.7627	2.60151	4.74943	5e-05	0.000758876	yes	2.60022
HIST1H3F	HIST1H3F	HIST1H3F	chr6:26250369-26250835	ctrl	dox	NOTEST	0	0.0506291	inf	0	1	1	no	2.60001
KC6	KC6	KC6	chr18:39060235-39100561	ctrl	dox	NOTEST	0	0.0506284	inf	0	1	1	no	2.59999
KCNQ1	KCNQ1	KCNQ1	chr11:2466220-2870340	ctrl	dox	OK	0.0285824	0.2236	2.96773	0.471932	0.1495	0.393819	no	2.59803
LYZL6	LYZL6	LYZL6	chr17:34261522-34270703	ctrl	dox	NOTEST	0	0.0505416	inf	0	1	1	no	2.59793
GUCA1C	GUCA1C	GUCA1C	chr3:108626641-108672677	ctrl	dox	NOTEST	0	0.0505088	inf	0	1	1	no	2.59714
CALB2	CALB2	CALB2	chr16:71392615-71424342	ctrl	dox	OK	15.3094	92.6147	2.59683	5.54068	5e-05	0.000758876	yes	2.59604
CST6	CST6	CST6	chr11:65779461-65780976	ctrl	dox	OK	0.123216	0.79537	2.69044	1.38851	0.0402	0.167624	no	2.59588
GPR115	GPR115	GPR115	chr6:47666288-47689757	ctrl	dox	OK	0.0716179	0.483142	2.75405	2.05113	0.00675	0.0438006	yes	2.59505
NTNG2	NTNG2	NTNG2	chr9:135037333-135118220	ctrl	dox	OK	0.0514422	0.36059	2.80934	1.49941	0.03805	0.161205	no	2.59252
LEMD1	LEMD1	LEMD1	chr1:205342379-205391214	ctrl	dox	OK	0.0648058	0.440687	2.76556	0.616364	0.11915	0.346508	no	2.5909
ANTXR1	ANTXR1	ANTXR1	chr2:69240275-69476459	ctrl	dox	OK	15.4724	93.1729	2.59021	5.75394	5e-05	0.000758876	yes	2.58944
[truncated: 23,822 more rows]
