# Supplementary material for: SATB2 induction of a neural crest mesenchyme-like program drives melanoma invasion and drug resistance
Source: eLife. 2021 Feb 2;10:e64370. doi: 10.7554/eLife.64370 (PMC7880683; doi:10.7554/eLife.64370)
Supplement: Supplementary file 5. [file elife-64370-supp5.xlsx]

## Sheet: qPCR primer sequences
Gene	Species	Forward primer sequence	Reverse primer sequence
BETA ACTIN	human	TCCCTGGAGAAGAGCTACGA	AGCACTGTGTTGGCGTACAG
SOX10	human	AGCTCAGCAAGACGCTGG	CTTTCTTGTGCTGCATACGG
SATB2	human	CCACCTTCCCAGCTTGATT	TTAGCCAGCTGGTGGAGACT
SNAI1	human	AGGTTGGAGCGGTCAGC	CCTTCTCTAGGCCCTGGCT
SNAI2	human	TGACCTGTCTGCAAATGCTC	CAGACCCTGGTTGCTTCAA
PDGFA	human	CACACCTCCTCGCTGTAGTATTTA	GTTATCGGTGTAAATGTCATCCAA
PDGFB	human	TCCCGAGGAGCTTTATGAGA	ACTGCACGTTGCGGTTGT
SEMA3F	human	TCCTCGTCCTTGAGCAAGAT	GGTCCGGCTCTCATTCAAA
snai2	zebrafish	TTATAGTGAACTGGAGAGTCCAACA	TCCATACTGTTATGGGATTGTACG
sox10	zebrafish	ATATCCGCACCTGCACAA	CGTTCAGCAGTCTCCACAG
fgfr4	zebrafish	CCCAATGCTGGCTGGAGTTA	GACCAAAGCAACCCTCTCCA
klf13	zebrafish	CCCATCTCAAAGCCCACCTAA	AGCTCATCAGAGCGAGCAA
rhobtb2a	zebrafish	GCTACGCTGATCTGGATGCT	CTTTAGCAACCTCGTGGCCT
sox2	zebrafish	GAGGAGGGAAACCGAGTTTGT	TGGAGGTAACTTTGCTGGGG
vim	zebrafish	ATCGAGACCAGAGACGGACA	GATCTTCAGTGCCTCGGGTT
beta actin	zebrafish	TCTCTTCCAGCCTTCCTTCCT	CTCATCGTACTCCTGCTTGCT
lifra	zebrafish	AATGGAAGGGTCTGTGGTG	ATTTCGAGCGACCAGAGTC
chd7	zebrafish	CACATGCTGCATTCTCCAC	TCCTTCTGCTGTAGGTCAC
igf2bp3	zebrafish	AAGCCAGAGAAGCAATGGA	TCTCATCTGGGATATAGGAAACC
pdgfab	zebrafish	GAGGAGCGTTGTAGAGGAG	AGTGGGATCCACTTGACTG
sema3aa	zebrafish	TCTTGAAAGCCAAGCTGAC	GAAACACATCCTGCAGCTC
c6	zebrafish	AGGAAAGAGTCTGTCATCCT	TACATCTTCCAGTGTCACAG
fbn2b	zebrafish	CCGAGTATAAGACTCTGTGTCC	ACTCGTCAATGTCCTCCAG
fn1b	zebrafish	GTATCATCTGTGTCACAAGATGG	CAGATAAATGCGCTCCCAC
gsnb	zebrafish	ATTGAAGAGGTGCCAGGAG	AACAAAGACCTGATCCCAGG
itga6b	zebrafish	GAAACACAGTTGACTGCCT	GCTGATCTGTTTATCACCAGAC
krt15	zebrafish	AGATCCGTGAGCAGTATGAG	CAATGTTTCTGACTTGGTTTGG
mao	zebrafish	GAGGAAGAAGGGATACTGTG	GGCTTAGTGTCGTCTAGTG
runx2a	zebrafish	AAACGCAGATCTCAGACCC	TTTGGCTCAGGTATGGAGG
ADAM28	zebrafish	AATGCAAATGTGAACCTGGA	TTGTCACACCTTTAGACAAACC
nrp2a	zebrafish	AAGGAGTACATACAGGTGGA	GGTCTCTTTGGAAATGGCT
cited2	zebrafish	AAGCACACTGGTGCAAAGC	AGAGGTGCCTCTTCATGTGC
fezf2	zebrafish	GTAAAGTATGCGGGAAAGGT	TTGTGAGGTTTCTCCTGTG
hdac1	zebrafish	ACGACTACATCAAGTTCCTC	CTACGTTAAATCTCTGCATCTG
camk2n1a	zebrafish	ACCAACTCGTTCTTCGGAG	GTCCTCGATGACCACTCTC
figf	zebrafish	CCCTCCAGTAAACAAGAACC	TGGAATACATTCACATCGCT
sema3fa	zebrafish	AAAGTGATTGTCCTGCCCA	AGTTGGAACTCTGAAGACCTC
